# Supplementary material for: Centromere protein N may be a novel malignant prognostic biomarker for hepatocellular carcinoma
Source: PeerJ. 2021 May 3;9:e11342. doi: 10.7717/peerj.11342 (PMC8101454; doi:10.7717/peerj.11342)
Supplement: File S1 [file peerj-09-11342-s011.xlsx]

## Sheet: Sheet1
ID	adj.P.Val	P.Value	t	B	logFC	Gene.symbol	Gene.title	Disease	Label
ILMN_1677497	3.75e-47	9.91e-52	-31.1073	105.949	-3.12712	STAB2	stabilin 2	Down	STAB2_Down
ILMN_2193817	2.32e-46	1.23e-50	-30.2168	103.58	-3.95382	CLEC4G	C-type lectin domain family 4 member G	Down	CLEC4G_Down
ILMN_1745103	2.52e-46	2e-50	-30.0465	103.119	-4.76593	CLEC1B	C-type lectin domain family 1 member B	Down	CLEC1B_Down
ILMN_1658333	1.19e-44	1.26e-48	-28.6339	99.2027	-1.72375	ECM1	extracellular matrix protein 1	Down	ECM1_Down
ILMN_1746220	1.24e-40	1.64e-44	-25.5963	90.1649	-3.19621	DBH	dopamine beta-hydroxylase	Down	DBH_Down
ILMN_2223561	4.22e-37	6.7e-41	-23.1351	82.1596	-3.07353	CRHBP	corticotropin releasing hormone binding protein	Down	CRHBP_Down
ILMN_1809364	1.75e-35	3.25e-39	-22.0463	78.4045	-1.53129	NTF3	neurotrophin 3	Down	NTF3_Down
ILMN_1784630	6.87e-35	1.45e-38	-21.6352	76.951	-2.77656	KBTBD11	kelch repeat and BTB domain containing 11	Down	KBTBD11_Down
ILMN_2322131	1.02e-34	2.43e-38	-21.4959	76.4538	-2.63339	CLEC4M	C-type lectin domain family 4 member M	Down	CLEC4M_Down
ILMN_1714057	1.32e-32	3.49e-36	-20.1753	71.6237	-2.51957	FCN2	ficolin 2	Down	FCN2_Down
ILMN_2125395	4.11e-32	1.25e-35	-19.844	70.3781	-1.73849	ADGRG7	adhesion G protein-coupled receptor G7	Down	ADGRG7_Down
ILMN_1781149	4.11e-32	1.3e-35	-19.8335	70.3384	-2.68153	INMT	indolethylamine N-methyltransferase	Down	INMT_Down
ILMN_1669523	4.75e-32	1.63e-35	-19.7756	70.1193	-3.74617	FOS	Fos proto-oncogene, AP-1 transcription factor subunit	Down	FOS_Down
ILMN_1658121	6.46e-32	2.39e-35	-19.6775	69.7468	-1.51647	CFP	complement factor properdin	Down	CFP_Down
ILMN_1731503	1e-31	3.97e-35	-19.5477	69.2523	-3.51282	MARCO	macrophage receptor with collagenous structure	Down	MARCO_Down
ILMN_1748323	1.35e-31	5.71e-35	-19.4551	68.8985	-1.95245	CXCL14	C-X-C motif chemokine ligand 14	Down	CXCL14_Down
ILMN_2149164	4.99e-31	2.24e-34	-19.1085	67.5633	-1.47972	SFRP1	secreted frizzled related protein 1	Down	SFRP1_Down
ILMN_1687848	6.03e-31	2.87e-34	-19.0464	67.3224	-2.61115	C7	complement component 7	Down	C7_Down
ILMN_1807745	9.16e-31	4.66e-34	-18.925	66.85	-1.75083	GYS2	glycogen synthase 2	Down	GYS2_Down
ILMN_1662962	3.56e-30	1.98e-33	-18.5646	65.4367	-1.37906	COLEC10	collectin subfamily member 10	Down	COLEC10_Down
ILMN_2339294	4.11e-30	2.39e-33	-18.5175	65.2506	-1.43685	LILRB5	leukocyte immunoglobulin like receptor B5	Down	LILRB5_Down
ILMN_2280960	4.35e-30	2.64e-33	-18.4928	65.1531	-1.2963	DEPDC7	DEP domain containing 7	Down	DEPDC7_Down
ILMN_1709486	6.36e-30	4.04e-33	-18.3881	64.7384	-2.60467	SRPX	sushi repeat containing protein, X-linked	Down	SRPX_Down
ILMN_1808114	7.64e-30	5.05e-33	-18.3331	64.5199	-2.77244	LYVE1	lymphatic vessel endothelial hyaluronan receptor 1	Down	LYVE1_Down
ILMN_1670903	3.19e-29	2.28e-32	-17.9645	63.0458	-2.46967	NAT2	N-acetyltransferase 2	Down	NAT2_Down
ILMN_2093343	5.04e-29	3.73e-32	-17.8447	62.563	-2.43715	PLAC8	placenta specific 8	Down	PLAC8_Down
ILMN_1693939	6.01e-29	4.61e-32	-17.7934	62.3554	-1.65074	OIT3	oncoprotein induced transcript 3	Down	OIT3_Down
ILMN_1728934	3.09e-28	2.46e-31	17.3913	60.7177	2.73991	PRC1	protein regulator of cytokinesis 1	Up	PRC1_Up
ILMN_1725518	5.46e-28	4.47e-31	-17.2481	60.1296	-2.23293	ANGPTL6	angiopoietin like 6	Down	ANGPTL6_Down
ILMN_1736412	6.47e-28	5.48e-31	-17.1999	59.931	-1.19667	AMHR2	anti-Mullerian hormone receptor type 2	Down	AMHR2_Down
ILMN_1686097	1.07e-27	9.37e-31	17.0727	59.4051	3.15128	TOP2A	topoisomerase (DNA) II alpha	Up	TOP2A_Up
ILMN_2349771	2.86e-27	2.57e-30	-16.8344	58.4142	-4.26052	FCN3	ficolin 3	Down	FCN3_Down
ILMN_2042771	4.58e-27	4.24e-30	16.7173	57.9248	2.52347	PTTG1	pituitary tumor-transforming 1	Up	PTTG1_Up
ILMN_1798947	3.35e-26	3.27e-29	-16.2415	55.9168	-1.10486	ANKRD55	ankyrin repeat domain 55	Down	ANKRD55_Down
ILMN_2199389	3.9e-26	3.92e-29	-16.1997	55.739	-2.41995	VIPR1	vasoactive intestinal peptide receptor 1	Down	VIPR1_Down
ILMN_2259467	5.36e-26	5.53e-29	-16.1208	55.4028	-1.59515	N4BP2L1	NEDD4 binding protein 2 like 1	Down	N4BP2L1_Down
ILMN_1682636	1.21e-25	1.28e-28	-15.9282	54.5783	-2.82113	CXCL2	C-X-C motif chemokine ligand 2	Down	CXCL2_Down
ILMN_1795166	1.27e-25	1.38e-28	-15.9106	54.5027	-2.17994	PTH1R	parathyroid hormone 1 receptor	Down	PTH1R_Down
ILMN_1775814	1.6e-25	1.77e-28	-15.8534	54.2569	-3.3867	GHR	growth hormone receptor	Down	GHR_Down
ILMN_1781700	2.76e-25	3.29e-28	-15.7129	53.6513	-1.20559	IL18R1	interleukin 18 receptor 1	Down	IL18R1_Down
ILMN_1657435	3.02e-25	3.67e-28	-15.6875	53.5412	-4.01285	MT1M	metallothionein 1M	Down	MT1M_Down
ILMN_2131861	3.04e-25	3.78e-28	-15.6813	53.5145	-2.91456	SOCS2	suppressor of cytokine signaling 2	Down	SOCS2_Down
ILMN_1803825	3.71e-25	4.7e-28	-15.6313	53.2982	-2.65993	CXCL12	C-X-C motif chemokine ligand 12	Down	CXCL12_Down
ILMN_1687319	7.62e-25	9.87e-28	-15.4635	52.5693	-3.01825	SLCO1B3	solute carrier organic anion transporter family member 1B3	Down	SLCO1B3_Down
ILMN_1759513	8.88e-25	1.17e-27	-15.4244	52.3989	-2.7486	RND3	Rho family GTPase 3	Down	RND3_Down
ILMN_2049184	9.63e-25	1.3e-27	-15.4016	52.2998	-3.34268	DNASE1L3	deoxyribonuclease 1 like 3	Down	DNASE1L3_Down
ILMN_2165993	1.21e-24	1.66e-27	-15.3458	52.0562	-2.07333	ITLN1	intelectin 1	Down	ITLN1_Down
ILMN_1751400	1.44e-24	2.02e-27	-15.3026	51.8674	-1.76865	SKAP1	src kinase associated phosphoprotein 1	Down	SKAP1_Down
ILMN_1718173	1.44e-24	2.05e-27	-15.2984	51.849	-1.78261	CDHR2	cadherin related family member 2	Down	CDHR2_Down
ILMN_1794890	2.2e-24	3.2e-27	-15.1991	51.4137	-2.04207	SLC38A4	solute carrier family 38 member 4	Down	SLC38A4_Down
ILMN_2067408	2.97e-24	4.41e-27	-15.1272	51.0979	-2.70025	CLRN3	clarin 3	Down	CLRN3_Down
ILMN_2105441	3.13e-24	4.71e-27	-15.1121	51.0313	-2.11035	JCHAIN	joining chain of multimeric IgA and IgM	Down	JCHAIN_Down
ILMN_1730917	6.29e-24	9.81e-27	-14.9486	50.3105	-2.37887	KMO	kynurenine 3-monooxygenase (kynurenine 3-hydroxylase)	Down	KMO_Down
ILMN_1811330	7e-24	1.11e-26	-14.921	50.1884	-2.14627	FAM134B	family with sequence similarity 134 member B	Down	FAM134B_Down
ILMN_1681882	8.08e-24	1.3e-26	-14.8854	50.0308	-2.3386	CETP	cholesteryl ester transfer protein	Down	CETP_Down
ILMN_1673566	9.71e-24	1.59e-26	-14.8409	49.8338	-1.59703	ADAMTS1	ADAM metallopeptidase with thrombospondin type 1 motif 1	Down	ADAMTS1_Down
ILMN_1695658	1.15e-23	1.92e-26	14.7998	49.6514	2.22194	KIF20A	kinesin family member 20A	Up	KIF20A_Up
ILMN_1663390	1.76e-23	3.02e-26	14.6991	49.2036	3.01398	CDC20	cell division cycle 20	Up	CDC20_Up
ILMN_1788895	1.79e-23	3.13e-26	-14.6911	49.1682	-2.22187	SRD5A2	steroid 5 alpha-reductase 2	Down	SRD5A2_Down
ILMN_1718766	2.03e-23	3.6e-26	-14.6601	49.0301	-4.04948	MT1F	metallothionein 1F	Down	MT1F_Down
ILMN_1743199	3.48e-23	6.25e-26	-14.5384	48.4865	-1.29105	EGR2	early growth response 2	Down	EGR2_Down
ILMN_1683607	6.4e-23	1.18e-25	-14.3981	47.8579	-5.01122	CYP1A2	cytochrome P450 family 1 subfamily A member 2	Down	CYP1A2_Down
ILMN_1720048	7.11e-23	1.34e-25	-14.3718	47.7398	-2.74399	CCL2	C-C motif chemokine ligand 2	Down	CCL2_Down
ILMN_1768662	7.32e-23	1.41e-25	14.3592	47.6831	1.61505	UCK2	uridine-cytidine kinase 2	Up	UCK2_Up
ILMN_2194577	7.45e-23	1.46e-25	14.3525	47.6532	1.71764	PLVAP	plasmalemma vesicle associated protein	Up	PLVAP_Up
ILMN_1751607	7.65e-23	1.52e-25	-14.3436	47.613	-3.16959	FOSB	FosB proto-oncogene, AP-1 transcription factor subunit	Down	FOSB_Down
ILMN_1677511	7.85e-23	1.58e-25	-14.3352	47.5754	-1.2184	PTGS2	prostaglandin-endoperoxide synthase 2	Down	PTGS2_Down
ILMN_1737862	1.17e-22	2.38e-25	14.2455	47.1714	1.21295	PSMB4	proteasome subunit beta 4	Up	PSMB4_Up
ILMN_1803197	2.02e-22	4.22e-25	14.1204	46.6065	1.31239	RAB3IP	RAB3A interacting protein	Up	RAB3IP_Up
ILMN_1709294	2.02e-22	4.23e-25	14.1198	46.6038	1.96085	CDCA8	cell division cycle associated 8	Up	CDCA8_Up
ILMN_1658802	2.6e-22	5.5e-25	14.0628	46.3459	1.44855	KRTCAP2	keratinocyte associated protein 2	Up	KRTCAP2_Up
ILMN_1712112	3.76e-22	8.06e-25	-13.9796	45.9684	-1.70271	RCAN1	regulator of calcineurin 1	Down	RCAN1_Down
ILMN_2289623	4.07e-22	8.83e-25	-13.9598	45.8784	-1.50979	TTC36	tetratricopeptide repeat domain 36	Down	TTC36_Down
ILMN_1683923	5.41e-22	1.2e-24	-13.8931	45.5753	-3.58339	MT1H	metallothionein 1H	Down	MT1H_Down
ILMN_1780667	6.33e-22	1.42e-24	13.8563	45.4077	1.50475	POC1A	POC1 centriolar protein A	Up	POC1A_Up
ILMN_1678535	7.76e-22	1.77e-24	-13.8097	45.1952	-1.94261	ESR1	estrogen receptor 1	Down	ESR1_Down
ILMN_1683450	8.17e-22	1.88e-24	13.7962	45.1333	2.27673	CDCA5	cell division cycle associated 5	Up	CDCA5_Up
ILMN_2086470	1.07e-21	2.5e-24	-13.735	44.8542	-1.78485	PDGFRA	platelet derived growth factor receptor alpha	Down	PDGFRA_Down
ILMN_1731184	1.69e-21	3.99e-24	13.6342	44.393	2.0876	MELK	maternal embryonic leucine zipper kinase	Up	MELK_Up
ILMN_2391512	2.37e-21	5.63e-24	-13.5599	44.0522	-1.19884	NAAA	N-acylethanolamine acid amidase	Down	NAAA_Down
ILMN_1658356	2.44e-21	5.88e-24	-13.5507	44.0097	-1.5795	PAMR1	peptidase domain containing associated with muscle regeneration 1	Down	PAMR1_Down
ILMN_2222008	2.68e-21	6.52e-24	13.5285	43.908	2.59745	KIFC1	kinesin family member C1	Up	KIFC1_Up
ILMN_2176592	2.79e-21	6.88e-24	-13.5171	43.8554	-2.63397	BCHE	butyrylcholinesterase	Down	BCHE_Down
ILMN_1751776	3.24e-21	8.15e-24	13.4806	43.6878	2.01118	CKAP2L	cytoskeleton associated protein 2 like	Up	CKAP2L_Up
ILMN_1684585	3.25e-21	8.33e-24	-13.476	43.6665	-2.23673	ACSL1	acyl-CoA synthetase long-chain family member 1	Down	ACSL1_Down
ILMN_1735180	3.25e-21	8.34e-24	13.4757	43.665	1.32346	NCSTN	nicastrin	Up	NCSTN_Up
ILMN_2077550	3.66e-21	9.49e-24	13.4479	43.5374	1.23844	RACGAP1	Rac GTPase activating protein 1	Up	RACGAP1_Up
ILMN_1676191	3.81e-21	9.99e-24	13.437	43.4871	1.37385	DARS2	aspartyl-tRNA synthetase 2, mitochondrial	Up	DARS2_Up
ILMN_2079655	5.43e-21	1.44e-23	-13.3593	43.1291	-2.15144	KLRB1	killer cell lectin like receptor B1	Down	KLRB1_Down
ILMN_2364110	6.15e-21	1.64e-23	13.3306	42.9963	1.44493	GBA	glucosylceramidase beta	Up	GBA_Up
ILMN_1767831	6.92e-21	1.87e-23	-13.3033	42.8704	-2.36015	C9	complement component 9	Down	C9_Down
ILMN_2399208	7.18e-21	1.96e-23	13.2932	42.8236	1.61109	SCAMP3	secretory carrier membrane protein 3	Up	SCAMP3_Up
ILMN_2225709	7.85e-21	2.16e-23	13.2723	42.7269	1.15126	PTCD1	pentatricopeptide repeat domain 1	Up	PTCD1_Up
ILMN_1680955	1.43e-20	3.98e-23	13.1419	42.1236	2.03658	AURKA	aurora kinase A	Up	AURKA_Up
ILMN_1740292	1.7e-20	4.76e-23	-13.1039	41.9469	-1.88801	PANK1	pantothenate kinase 1	Down	PANK1_Down
ILMN_1727284	3.42e-20	9.84e-23	-12.9499	41.231	-1.29405	CD4	CD4 molecule	Down	CD4_Down
ILMN_1708107	3.42e-20	9.86e-23	-12.9495	41.2291	-2.65428	DPT	dermatopontin	Down	DPT_Down
ILMN_1664350	3.68e-20	1.07e-22	-12.932	41.1476	-3.14225	GBA3	glucosylceramidase beta 3 (gene/pseudogene)	Down	GBA3_Down
ILMN_1744240	4.32e-20	1.27e-22	12.896	40.9796	1.19863	TBC1D31	TBC1 domain family member 31	Up	TBC1D31_Up
ILMN_2188966	4.38e-20	1.3e-22	-12.8912	40.9571	-3.12865	IGFALS	insulin like growth factor binding protein acid labile subunit	Down	IGFALS_Down
ILMN_1797731	6.33e-20	1.89e-22	-12.8115	40.585	-2.38384	MS4A6A	membrane spanning 4-domains A6A	Down	MS4A6A_Down
ILMN_1675448	6.62e-20	2e-22	-12.8002	40.5323	-1.51672	ZFP36L1	ZFP36 ring finger protein like 1	Down	ZFP36L1_Down
ILMN_1727073	9.31e-20	2.83e-22	12.7266	40.1882	1.07315	MEA1	male-enhanced antigen 1	Up	MEA1_Up
ILMN_1678998	1.01e-19	3.1e-22	12.7072	40.097	1.17666	LRRC14	leucine rich repeat containing 14	Up	LRRC14_Up
ILMN_1801939	1.02e-19	3.15e-22	12.7038	40.0815	2.26552	CCNB2	cyclin B2	Up	CCNB2_Up
ILMN_2357260	1.11e-19	3.47e-22	12.6838	39.9874	1.12665	CPSF4	cleavage and polyadenylation specific factor 4	Up	CPSF4_Up
ILMN_1677038	1.16e-19	3.65e-22	-12.6731	39.9375	-2.21702	CPED1	cadherin like and PC-esterase domain containing 1	Down	CPED1_Down
ILMN_1746085	1.68e-19	5.32e-22	-12.5938	39.5654	-2.56098	IGFBP3	insulin like growth factor binding protein 3	Down	IGFBP3_Down
ILMN_2365176	1.93e-19	6.29e-22	-12.5587	39.4004	-2.00941	ALDH8A1	aldehyde dehydrogenase 8 family member A1	Down	ALDH8A1_Down
ILMN_1683475	1.97e-19	6.45e-22	12.5534	39.3756	1.35752	TOMM40	translocase of outer mitochondrial membrane 40	Up	TOMM40_Up
ILMN_1703906	2e-19	6.61e-22	12.5481	39.3508	1.88766	HJURP	Holliday junction recognition protein	Up	HJURP_Up
ILMN_1657838	2.16e-19	7.21e-22	-12.5301	39.2662	-2.14344	KDM8	lysine demethylase 8	Down	KDM8_Down
ILMN_2357031	2.19e-19	7.36e-22	-12.5257	39.2455	-1.49922	AADAT	aminoadipate aminotransferase	Down	AADAT_Down
ILMN_1784967	2.4e-19	8.19e-22	-12.5033	39.1401	-1.26895	EPB41L4B	erythrocyte membrane protein band 4.1 like 4B	Down	EPB41L4B_Down
ILMN_1777190	2.62e-19	9.01e-22	-12.4834	39.0462	-2.10815	CFD	complement factor D	Down	CFD_Down
ILMN_1736112	2.69e-19	9.31e-22	-12.4763	39.013	-1.46297	ARHGAP10	Rho GTPase activating protein 10	Down	ARHGAP10_Down
ILMN_1782633	3.87e-19	1.37e-21	12.3954	38.632	1.30821	BOLA2	bolA family member 2	Up	BOLA2_Up
ILMN_1747366	5.63e-19	2.03e-21	-12.3137	38.2462	-1.77344	C11orf96	chromosome 11 open reading frame 96	Down	C11orf96_Down
ILMN_1714401	6.39e-19	2.32e-21	12.2856	38.1133	1.26938	SNX27	sorting nexin family member 27	Up	SNX27_Up
ILMN_1755834	6.48e-19	2.36e-21	12.2814	38.0934	1.67963	FEN1	flap structure-specific endonuclease 1	Up	FEN1_Up
ILMN_2211546	6.69e-19	2.46e-21	-12.2731	38.0541	-2.60548	HAO1	hydroxyacid oxidase 1	Down	HAO1_Down
ILMN_1738681	7.23e-19	2.7e-21	12.254	37.964	1.056	NUP62	nucleoporin 62	Up	NUP62_Up
ILMN_1704672	7.78e-19	2.92e-21	12.2371	37.8843	1.12942	NABP2	nucleic acid binding protein 2	Up	NABP2_Up
ILMN_2409298	7.85e-19	2.97e-21	12.2339	37.869	1.82266	NUSAP1	nucleolar and spindle associated protein 1	Up	NUSAP1_Up
ILMN_1772910	7.99e-19	3.04e-21	-12.2286	37.844	-1.10178	GAS1	growth arrest specific 1	Down	GAS1_Down
ILMN_1771118	9.27e-19	3.56e-21	-12.1962	37.6908	-1.67845	SLCO1B1	solute carrier organic anion transporter family member 1B1	Down	SLCO1B1_Down
ILMN_1651799	9.56e-19	3.69e-21	-12.1883	37.6532	-2.31368	SLC38A2	solute carrier family 38 member 2	Down	SLC38A2_Down
ILMN_1769032	1.09e-18	4.26e-21	-12.1585	37.5119	-1.70903	GLYATL1	glycine-N-acyltransferase like 1	Down	GLYATL1_Down
ILMN_1664516	1.32e-18	5.22e-21	12.1161	37.3113	1.99913	CENPF	centromere protein F	Up	CENPF_Up
ILMN_1737205	1.61e-18	6.38e-21	12.0744	37.1134	1.84299	MCM4	minichromosome maintenance complex component 4	Up	MCM4_Up
ILMN_1675398	1.74e-18	6.93e-21	-12.0572	37.0314	-1.3917	ALDH1B1	aldehyde dehydrogenase 1 family member B1	Down	ALDH1B1_Down
ILMN_1705774	1.79e-18	7.21e-21	12.049	36.9928	1.38851	TIGD5	tigger transposable element derived 5	Up	TIGD5_Up
ILMN_1682176	1.93e-18	7.81e-21	-12.0324	36.9137	-1.2141	CLEC3B	C-type lectin domain family 3 member B	Down	CLEC3B_Down
ILMN_2154654	1.99e-18	8.11e-21	-12.0245	36.8765	-1.79111	PTP4A1	protein tyrosine phosphatase type IVA, member 1	Down	PTP4A1_Down
ILMN_1661490	2.22e-18	9.1e-21	12.0006	36.763	1.21924	PFDN6	prefoldin subunit 6	Up	PFDN6_Up
ILMN_1715994	2.53e-18	1.04e-20	11.9722	36.6278	1.49666	HGS	hepatocyte growth factor-regulated tyrosine kinase substrate	Up	HGS_Up
ILMN_1656713	2.9e-18	1.22e-20	-11.9399	36.4741	-3.21536	IGLL1	immunoglobulin lambda like polypeptide 1	Down	IGLL1_Down
ILMN_1783963	3.44e-18	1.46e-20	-11.903	36.2986	-2.18645	AGXT2	alanine--glyoxylate aminotransferase 2	Down	AGXT2_Down
ILMN_2301083	3.76e-18	1.6e-20	11.8832	36.2043	1.88052	UBE2C	ubiquitin conjugating enzyme E2 C	Up	UBE2C_Up
ILMN_1779404	4.91e-18	2.1e-20	11.8269	35.936	1.07876	PUF60	poly(U) binding splicing factor 60	Up	PUF60_Up
ILMN_2367743	5.01e-18	2.16e-20	11.8213	35.9092	1.28183	TUBG1	tubulin gamma 1	Up	TUBG1_Up
ILMN_1802205	5.93e-18	2.59e-20	-11.7838	35.7306	-2.21139	RHOB	ras homolog family member B	Down	RHOB_Down
ILMN_1670099	6.62e-18	2.92e-20	-11.7586	35.6104	-1.12208	NOSTRIN	nitric oxide synthase trafficking	Down	NOSTRIN_Down
ILMN_1803300	6.75e-18	3e-20	-11.7533	35.5849	-2.95845	SLC25A47	solute carrier family 25 member 47	Down	SLC25A47_Down
ILMN_1720829	6.91e-18	3.09e-20	-11.7473	35.5563	-1.71545	ZFP36	ZFP36 ring finger protein	Down	ZFP36_Down
ILMN_1750678	8.41e-18	3.78e-20	-11.7054	35.3565	-1.65599	TIMD4	T-cell immunoglobulin and mucin domain containing 4	Down	TIMD4_Down
ILMN_1707312	9.96e-18	4.52e-20	-11.6687	35.1809	-1.64897	NFIL3	nuclear factor, interleukin 3 regulated	Down	NFIL3_Down
ILMN_1730325	9.96e-18	4.53e-20	11.6681	35.1781	1.12951	FLAD1	flavin adenine dinucleotide synthetase 1	Up	FLAD1_Up
ILMN_1740764	1.19e-17	5.48e-20	-11.6288	34.9902	-1.03224	CHD3	chromodomain helicase DNA binding protein 3	Down	CHD3_Down
ILMN_1656369	1.48e-17	6.97e-20	-11.5791	34.7524	-2.46035	C8orf4	chromosome 8 open reading frame 4	Down	C8orf4_Down
ILMN_2226324	1.48e-17	7e-20	-11.5783	34.7485	-1.63072	MPC1	mitochondrial pyruvate carrier 1	Down	MPC1_Down
ILMN_1745607	1.55e-17	7.41e-20	-11.5667	34.6928	-2.52398	A2M	alpha-2-macroglobulin	Down	A2M_Down
ILMN_2100437	1.72e-17	8.35e-20	-11.542	34.5747	-2.65501	HBB	hemoglobin subunit beta	Down	HBB_Down
ILMN_1729188	1.73e-17	8.43e-20	-11.5401	34.5654	-4.73981	HAMP	hepcidin antimicrobial peptide	Down	HAMP_Down
ILMN_1658472	2.06e-17	1.01e-19	11.5034	34.39	1.46571	APH1A	aph-1 homolog A, gamma-secretase subunit	Up	APH1A_Up
ILMN_1815102	2.06e-17	1.01e-19	-11.502	34.3831	-2.23234	LCAT	lecithin-cholesterol acyltransferase	Down	LCAT_Down
ILMN_2347145	2.2e-17	1.09e-19	-11.4876	34.3138	-3.42543	DCN	decorin	Down	DCN_Down
ILMN_2346769	2.5e-17	1.25e-19	11.4591	34.1775	1.30219	FAM189B	family with sequence similarity 189 member B	Up	FAM189B_Up
ILMN_1810651	2.65e-17	1.33e-19	-11.446	34.1145	-3.21758	F9	coagulation factor IX	Down	F9_Down
ILMN_1806037	2.83e-17	1.43e-19	11.4312	34.0437	1.71253	TK1	thymidine kinase 1	Up	TK1_Up
ILMN_1749996	3.45e-17	1.76e-19	-11.3883	33.8377	-1.67404	KCNN2	potassium calcium-activated channel subfamily N member 2	Down	KCNN2_Down
ILMN_1793990	3.78e-17	1.94e-19	-11.3686	33.7431	-1.73855	ID2	inhibitor of DNA binding 2, HLH protein	Down	ID2_Down
ILMN_1738819	3.78e-17	1.95e-19	11.3674	33.7372	1.00513	EFTUD2	elongation factor Tu GTP binding domain containing 2	Up	EFTUD2_Up
ILMN_2116714	3.83e-17	1.99e-19	11.3636	33.7192	1.32412	SLC39A1	solute carrier family 39 member 1	Up	SLC39A1_Up
ILMN_1772894	5.43e-17	2.87e-19	-11.2876	33.3538	-2.3532	TMEM27	transmembrane protein 27	Down	TMEM27_Down
ILMN_2391900	5.64e-17	3.01e-19	11.2778	33.3066	1.40209	SLC26A6	solute carrier family 26 member 6	Up	SLC26A6_Up
ILMN_1796589	5.66e-17	3.04e-19	11.2761	33.2985	1.98143	TRIP13	thyroid hormone receptor interactor 13	Up	TRIP13_Up
ILMN_2089329	5.85e-17	3.16e-19	-11.2684	33.2617	-1.32184	SPRY2	sprouty RTK signaling antagonist 2	Down	SPRY2_Down
ILMN_1760778	5.87e-17	3.19e-19	-11.2663	33.2512	-1.46967	ENG	endoglin	Down	ENG_Down
ILMN_1813975	5.87e-17	3.2e-19	-11.2657	33.2483	-1.20983	ADI1	acireductone dioxygenase 1	Down	ADI1_Down
ILMN_1812926	6.37e-17	3.49e-19	-11.2477	33.1621	-1.66952	ANTXR2	anthrax toxin receptor 2	Down	ANTXR2_Down
ILMN_1781207	6.75e-17	3.75e-19	-11.2331	33.0915	-1.01012	FYN	FYN proto-oncogene, Src family tyrosine kinase	Down	FYN_Down
ILMN_1735093	7.79e-17	4.35e-19	11.2024	32.9438	1.1536	TIMELESS	timeless circadian clock	Up	TIMELESS_Up
ILMN_1688722	7.79e-17	4.37e-19	-11.2018	32.9408	-1.34239	IL13RA2	interleukin 13 receptor subunit alpha 2	Down	IL13RA2_Down
ILMN_1670117	8.42e-17	4.74e-19	-11.1847	32.8589	-1.11991	ABAT	4-aminobutyrate aminotransferase	Down	ABAT_Down
ILMN_1657547	8.43e-17	4.77e-19	11.1835	32.853	1.59644	CCDC34	coiled-coil domain containing 34	Up	CCDC34_Up
ILMN_1743911	9.21e-17	5.24e-19	11.1645	32.7616	1.25477	SLC25A39	solute carrier family 25 member 39	Up	SLC25A39_Up
ILMN_1741841	9.32e-17	5.32e-19	11.1611	32.745	1.07621	KIAA1429	KIAA1429	Up	KIAA1429_Up
ILMN_1773119	1.01e-16	5.81e-19	11.1431	32.6583	1.56861	CCNF	cyclin F	Up	CCNF_Up
ILMN_1656285	1.01e-16	5.84e-19	-11.1422	32.654	-1.41762	METTL7A	methyltransferase like 7A	Down	METTL7A_Down
ILMN_2119692	1.14e-16	6.61e-19	-11.1166	32.5306	-1.482	CSAD	cysteine sulfinic acid decarboxylase	Down	CSAD_Down
ILMN_1685952	1.15e-16	6.7e-19	-11.1141	32.5186	-1.93641	ACSM3	acyl-CoA synthetase medium-chain family member 3	Down	ACSM3_Down
ILMN_2168217	1.16e-16	6.83e-19	-11.1101	32.4993	-1.22322	GPR183	G protein-coupled receptor 183	Down	GPR183_Down
ILMN_1693879	1.33e-16	7.87e-19	-11.081	32.3589	-1.05785	RANBP3L	RAN binding protein 3 like	Down	RANBP3L_Down
ILMN_1722774	1.33e-16	7.91e-19	11.08	32.3543	1.13641	VPS72	vacuolar protein sorting 72 homolog	Up	VPS72_Up
ILMN_2188333	1.33e-16	7.96e-19	-11.0788	32.3482	-1.10782	CD69	CD69 molecule	Down	CD69_Down
ILMN_1747305	1.34e-16	8.04e-19	-11.0765	32.3376	-1.31281	GIMAP8	GTPase, IMAP family member 8	Down	GIMAP8_Down
ILMN_1757338	1.37e-16	8.24e-19	-11.0717	32.3143	-1.5269	PLSCR4	phospholipid scramblase 4	Down	PLSCR4_Down
ILMN_2379599	1.56e-16	9.45e-19	-11.0435	32.1783	-2.2225	CD163	CD163 molecule	Down	CD163_Down
ILMN_1686884	1.77e-16	1.08e-18	-11.0161	32.0461	-1.21951	IL1RAP	interleukin 1 receptor accessory protein	Down	IL1RAP_Down
ILMN_1717853	2.04e-16	1.25e-18	-10.9859	31.9001	-2.01231	DMGDH	dimethylglycine dehydrogenase	Down	DMGDH_Down
ILMN_1715636	2.19e-16	1.35e-18	10.9702	31.8245	1.06942	EIF3B	eukaryotic translation initiation factor 3 subunit B	Up	EIF3B_Up
ILMN_1716336	2.23e-16	1.38e-18	10.9656	31.8022	1.06749	CKAP5	cytoskeleton associated protein 5	Up	CKAP5_Up
ILMN_1799667	2.34e-16	1.45e-18	10.9556	31.7539	1.39137	KIF4A	kinesin family member 4A	Up	KIF4A_Up
ILMN_1768062	2.34e-16	1.46e-18	-10.9543	31.7479	-1.17572	ADK	adenosine kinase	Down	ADK_Down
ILMN_1672419	2.38e-16	1.49e-18	-10.9503	31.7281	-1.54746	SMARCA2	SWI/SNF related, matrix associated, actin dependent regulator of chromatin, subfamily a, member 2	Down	SMARCA2_Down
ILMN_1675325	2.53e-16	1.59e-18	-10.9365	31.6617	-1.11911	ENPEP	glutamyl aminopeptidase	Down	ENPEP_Down
ILMN_1754491	2.72e-16	1.72e-18	-10.9211	31.5874	-1.43593	IYD	iodotyrosine deiodinase	Down	IYD_Down
ILMN_1694653	2.72e-16	1.73e-18	-10.92	31.5821	-1.94007	CNDP1	carnosine dipeptidase 1	Down	CNDP1_Down
ILMN_1694075	2.83e-16	1.81e-18	-10.911	31.5383	-1.88028	GADD45A	growth arrest and DNA damage inducible alpha	Down	GADD45A_Down
ILMN_1727815	2.96e-16	1.9e-18	-10.9006	31.4882	-1.9392	CFI	complement factor I	Down	CFI_Down
ILMN_1711617	2.96e-16	1.9e-18	-10.9003	31.4866	-1.22784	GMFG	glia maturation factor gamma	Down	GMFG_Down
ILMN_1738784	3.09e-16	2e-18	10.8898	31.436	1.38696	PPP2R5A	protein phosphatase 2 regulatory subunit B'alpha	Up	PPP2R5A_Up
ILMN_1756920	3.14e-16	2.04e-18	10.8858	31.4165	1.34426	ADAM15	ADAM metallopeptidase domain 15	Up	ADAM15_Up
ILMN_1708778	3.24e-16	2.12e-18	-10.8778	31.3782	-2.07337	ASS1	argininosuccinate synthase 1	Down	ASS1_Down
ILMN_2204576	3.24e-16	2.13e-18	-10.8777	31.3777	-3.15704	HSD17B13	hydroxysteroid 17-beta dehydrogenase 13	Down	HSD17B13_Down
ILMN_1660114	3.35e-16	2.23e-18	-10.8683	31.332	-1.13377	MMRN1	multimerin 1	Down	MMRN1_Down
ILMN_1702389	3.39e-16	2.26e-18	10.8652	31.3174	1.21371	ZC3H3	zinc finger CCCH-type containing 3	Up	ZC3H3_Up
ILMN_2103024	3.5e-16	2.35e-18	-10.8573	31.2789	-1.85716	RBP5	retinol binding protein 5	Down	RBP5_Down
ILMN_1660199	3.54e-16	2.39e-18	-10.8542	31.264	-2.40835	ACAA2	acetyl-CoA acyltransferase 2	Down	ACAA2_Down
ILMN_1683755	3.54e-16	2.39e-18	10.8535	31.2604	1.33929	SOX13	SRY-box 13	Up	SOX13_Up
ILMN_1684217	3.88e-16	2.64e-18	10.8337	31.1649	1.6649	AURKB	aurora kinase B	Up	AURKB_Up
ILMN_1694240	3.96e-16	2.7e-18	-10.8286	31.1401	-1.06244	MAP2K1	mitogen-activated protein kinase kinase 1	Down	MAP2K1_Down
ILMN_1718207	4.11e-16	2.82e-18	10.8202	31.0995	1.18757	SETDB1	SET domain bifurcated 1	Up	SETDB1_Up
ILMN_1698770	4.42e-16	3.04e-18	-10.8048	31.0251	-1.28786	NADK2	NAD kinase 2, mitochondrial	Down	NADK2_Down
ILMN_1774836	4.69e-16	3.24e-18	10.7919	30.9629	1.25822	PLOD3	procollagen-lysine,2-oxoglutarate 5-dioxygenase 3	Up	PLOD3_Up
ILMN_2334989	4.7e-16	3.26e-18	10.7904	30.9554	1.35033	CCT3	chaperonin containing TCP1 subunit 3	Up	CCT3_Up
ILMN_2146657	4.77e-16	3.33e-18	-10.7862	30.935	-1.21895	FAHD2B	fumarylacetoacetate hydrolase domain containing 2B	Down	FAHD2B_Down
ILMN_1729294	4.93e-16	3.46e-18	-10.7784	30.8971	-1.62802	RNF130	ring finger protein 130	Down	RNF130_Down
ILMN_1696590	5.03e-16	3.54e-18	-10.7737	30.8744	-2.51231	CHST4	carbohydrate sulfotransferase 4	Down	CHST4_Down
ILMN_2129234	5.28e-16	3.73e-18	-10.763	30.8226	-1.48493	TMEM47	transmembrane protein 47	Down	TMEM47_Down
ILMN_2167805	5.67e-16	4.02e-18	-10.7476	30.7481	-2.27988	LUM	lumican	Down	LUM_Down
ILMN_1715508	6.02e-16	4.29e-18	-10.7345	30.685	-2.54908	NNMT	nicotinamide N-methyltransferase	Down	NNMT_Down
ILMN_1760121	6.21e-16	4.44e-18	10.7276	30.6514	1.25461	RRAGC	Ras related GTP binding C	Up	RRAGC_Up
ILMN_1691237	6.52e-16	4.67e-18	10.717	30.6003	2.12433	CAP2	CAP, adenylate cyclase-associated protein, 2 (yeast)	Up	CAP2_Up
ILMN_1681503	6.75e-16	4.87e-18	10.7084	30.5585	2.12744	MCM2	minichromosome maintenance complex component 2	Up	MCM2_Up
ILMN_1775008	6.76e-16	4.9e-18	10.7072	30.5529	1.1502	NCAPD2	non-SMC condensin I complex subunit D2	Up	NCAPD2_Up
ILMN_2175220	6.78e-16	4.93e-18	-10.7059	30.5461	-1.94485	CYP39A1	cytochrome P450 family 39 subfamily A member 1	Down	CYP39A1_Down
ILMN_1781479	6.84e-16	5e-18	10.7034	30.5341	1.18633	SUV39H1	suppressor of variegation 3-9 homolog 1	Up	SUV39H1_Up
ILMN_1788099	7.47e-16	5.48e-18	10.6846	30.4434	1.33223	LSM4	LSM4 homolog, U6 small nuclear RNA and mRNA degradation associated	Up	LSM4_Up
ILMN_2066060	7.49e-16	5.51e-18	-10.6835	30.4379	-1.36693	HLA-DRB6	major histocompatibility complex, class II, DR beta 6 (pseudogene)	Down	HLA-DRB6_Down
ILMN_1729417	7.67e-16	5.68e-18	-10.677	30.4064	-2.36298	GNE	glucosamine (UDP-N-acetyl)-2-epimerase/N-acetylmannosamine kinase	Down	GNE_Down
ILMN_1716359	8.11e-16	6.03e-18	-10.6651	30.3486	-1.71494	SLC19A3	solute carrier family 19 member 3	Down	SLC19A3_Down
ILMN_2188264	8.22e-16	6.13e-18	-10.6615	30.3311	-2.10392	CYR61	cysteine rich angiogenic inducer 61	Down	CYR61_Down
ILMN_1709747	8.45e-16	6.32e-18	-10.6552	30.301	-2.41177	EXOG	endo/exonuclease (5'-3'), endonuclease G-like	Down	EXOG_Down
ILMN_2380237	9.22e-16	6.95e-18	-10.6359	30.2074	-1.62222	C1QTNF1	C1q and tumor necrosis factor related protein 1	Down	C1QTNF1_Down
ILMN_1716733	9.49e-16	7.18e-18	-10.6295	30.1761	-1.66074	MYOM2	myomesin 2	Down	MYOM2_Down
ILMN_2401253	9.65e-16	7.32e-18	-10.6253	30.156	-1.16656	FAM13A	family with sequence similarity 13 member A	Down	FAM13A_Down
ILMN_1701877	1.01e-15	7.76e-18	-10.6137	30.0995	-1.37218	AXL	AXL receptor tyrosine kinase	Down	AXL_Down
ILMN_1745573	1.06e-15	8.1e-18	10.6049	30.0571	1.01945	TTC13	tetratricopeptide repeat domain 13	Up	TTC13_Up
ILMN_2127842	1.17e-15	9.01e-18	-10.5831	29.9513	-2.15677	HBA2	hemoglobin subunit alpha 2	Down	HBA2_Down
ILMN_1661109	1.24e-15	9.64e-18	-10.5694	29.8849	-1.38519	ATF3	activating transcription factor 3	Down	ATF3_Down
ILMN_1685916	1.3e-15	1.02e-17	10.5575	29.8275	1.51258	KIF2C	kinesin family member 2C	Up	KIF2C_Up
ILMN_1781942	1.42e-15	1.12e-17	10.539	29.7374	1.34934	HMMR	hyaluronan mediated motility receptor	Up	HMMR_Up
ILMN_1772206	1.48e-15	1.17e-17	-10.5301	29.6941	-4.24396	CYP3A4	cytochrome P450 family 3 subfamily A member 4	Down	CYP3A4_Down
ILMN_1701468	1.48e-15	1.18e-17	-10.5291	29.6893	-3.47832	HGFAC	HGF activator	Down	HGFAC_Down
ILMN_2093027	1.56e-15	1.25e-17	-10.5165	29.6283	-1.61025	MYO1B	myosin IB	Down	MYO1B_Down
ILMN_1692896	1.56e-15	1.25e-17	10.5162	29.627	1.10913	JMJD4	jumonji domain containing 4	Up	JMJD4_Up
ILMN_1805131	1.57e-15	1.26e-17	10.5141	29.6165	1.09005	OXLD1	oxidoreductase like domain containing 1	Up	OXLD1_Up
ILMN_1652580	1.6e-15	1.29e-17	10.5095	29.5945	1.10447	POLD1	DAN polymerase delta 1, catalytic subunit	Up	POLD1_Up
ILMN_1665832	1.76e-15	1.44e-17	-10.4881	29.4906	-1.98381	ID1	inhibitor of DNA binding 1, HLH protein	Down	ID1_Down
ILMN_1673711	1.83e-15	1.5e-17	10.4793	29.4477	1.11941	HSP90AB1	heat shock protein 90 alpha family class B member 1	Up	HSP90AB1_Up
ILMN_1691090	1.86e-15	1.54e-17	10.4743	29.4236	1.01123	MPV17	MPV17, mitochondrial inner membrane protein	Up	MPV17_Up
ILMN_2305116	1.86e-15	1.54e-17	-10.4738	29.4213	-2.22409	CTH	cystathionine gamma-lyase	Down	CTH_Down
ILMN_1790202	1.94e-15	1.62e-17	10.4639	29.3732	1.03191	C1orf35	chromosome 1 open reading frame 35	Up	C1orf35_Up
ILMN_1788131	2.06e-15	1.73e-17	-10.4508	29.3096	-1.43817	CYP26A1	cytochrome P450 family 26 subfamily A member 1	Down	CYP26A1_Down
ILMN_1753243	2.06e-15	1.73e-17	10.4504	29.3075	1.12834	DNAJB11	DnaJ heat shock protein family (Hsp40) member B11	Up	DNAJB11_Up
ILMN_1665205	2.11e-15	1.78e-17	10.4446	29.2796	1.04008	ZNF260	zinc finger protein 260	Up	ZNF260_Up
ILMN_1776993	2.33e-15	1.97e-17	10.4238	29.1786	1.18884	COG2	component of oligomeric golgi complex 2	Up	COG2_Up
ILMN_1791106	2.49e-15	2.12e-17	10.4092	29.1078	1.07472	HEATR6	HEAT repeat containing 6	Up	HEATR6_Up
ILMN_1664798	2.65e-15	2.27e-17	-10.3953	29.0401	-1.93205	GRHPR	glyoxylate and hydroxypyruvate reductase	Down	GRHPR_Down
ILMN_2345292	2.72e-15	2.33e-17	-10.3896	29.0124	-1.80541	FXYD1	FXYD domain containing ion transport regulator 1	Down	FXYD1_Down
ILMN_1673798	2.73e-15	2.35e-17	10.3883	29.0063	1.24889	PPOX	protoporphyrinogen oxidase	Up	PPOX_Up
ILMN_2218648	3.09e-15	2.67e-17	10.3619	28.8778	1.38991	SLC50A1	solute carrier family 50 member 1	Up	SLC50A1_Up
ILMN_1758034	3.67e-15	3.22e-17	-10.3241	28.6945	-1.6441	ETFDH	electron transfer flavoprotein dehydrogenase	Down	ETFDH_Down
ILMN_1721818	3.97e-15	3.49e-17	-10.3078	28.615	-1.45546	CLDN10	claudin 10	Down	CLDN10_Down
ILMN_1721495	3.99e-15	3.51e-17	-10.3062	28.6075	-2.30178	ADAMTSL2	ADAMTS like 2	Down	ADAMTSL2_Down
ILMN_1789510	4.16e-15	3.67e-17	10.2972	28.5637	1.35711	STIP1	stress induced phosphoprotein 1	Up	STIP1_Up
ILMN_2404385	4.38e-15	3.9e-17	10.2853	28.5057	1.07032	REPIN1	replication initiator 1	Up	REPIN1_Up
ILMN_1788802	4.72e-15	4.21e-17	-10.2696	28.4297	-1.12932	GCH1	GTP cyclohydrolase 1	Down	GCH1_Down
ILMN_1713807	5.65e-15	5.07e-17	-10.2319	28.2464	-1.75651	MAN1C1	mannosidase alpha class 1C member 1	Down	MAN1C1_Down
ILMN_1757627	6.1e-15	5.49e-17	10.2157	28.1675	1.07037	ZMYND19	zinc finger MYND-type containing 19	Up	ZMYND19_Up
ILMN_1657796	6.53e-15	5.89e-17	10.2012	28.097	1.18096	STMN1	stathmin 1	Up	STMN1_Up
ILMN_1696713	7.11e-15	6.43e-17	10.1834	28.0107	1.2852	POLA2	DNA polymerase alpha 2, accessory subunit	Up	POLA2_Up
ILMN_1695719	7.26e-15	6.59e-17	10.1786	27.987	1.77265	AGO2	argonaute 2, RISC catalytic component	Up	AGO2_Up
ILMN_1677439	7.32e-15	6.67e-17	-10.1761	27.9748	-2.40386	GLS2	glutaminase 2	Down	GLS2_Down
ILMN_1806533	7.32e-15	6.68e-17	-10.1758	27.9737	-1.3871	PDE7B	phosphodiesterase 7B	Down	PDE7B_Down
ILMN_1798654	7.42e-15	6.79e-17	10.1724	27.9571	1.55832	MCM6	minichromosome maintenance complex component 6	Up	MCM6_Up
ILMN_2082244	7.89e-15	7.26e-17	10.1588	27.8909	1.0295	FOXK1	forkhead box K1	Up	FOXK1_Up
ILMN_2389155	8.46e-15	7.83e-17	-10.1435	27.8163	-1.54174	UGP2	UDP-glucose pyrophosphorylase 2	Down	UGP2_Down
ILMN_1736597	8.47e-15	7.86e-17	10.1426	27.8122	1.67546	TKT	transketolase	Up	TKT_Up
ILMN_1756806	8.53e-15	7.94e-17	-10.1407	27.8027	-1.31042	MCL1	BCL2 family apoptosis regulator	Down	MCL1_Down
ILMN_1718853	8.8e-15	8.26e-17	-10.1325	27.7631	-1.50182	UQCRC2	ubiquinol-cytochrome c reductase core protein II	Down	UQCRC2_Down
ILMN_2341343	8.8e-15	8.29e-17	-10.1319	27.7601	-2.16973	AGTR1	angiotensin II receptor type 1	Down	AGTR1_Down
ILMN_1724897	8.92e-15	8.42e-17	10.1287	27.7445	1.10094	C14orf93	chromosome 14 open reading frame 93	Up	C14orf93_Up
ILMN_1769633	9.29e-15	8.8e-17	-10.1197	27.7009	-1.42882	CTSO	cathepsin O	Down	CTSO_Down
ILMN_2091310	9.66e-15	9.2e-17	-10.1107	27.6571	-1.73714	ANO1	anoctamin 1	Down	ANO1_Down
ILMN_1693210	9.76e-15	9.32e-17	10.1081	27.6443	1.58788	NSMCE2	NSE2/MMS21 homolog, SMC5-SMC6 complex SUMO ligase	Up	NSMCE2_Up
ILMN_2052924	1.01e-14	9.63e-17	-10.1015	27.612	-1.28237	IL33	interleukin 33	Down	IL33_Down
ILMN_1719403	1.2e-14	1.17e-16	10.0622	27.4208	1.00912	MTX1	metaxin 1	Up	MTX1_Up
ILMN_1703743	1.21e-14	1.19e-16	10.0588	27.4043	1.12375	AATF	apoptosis antagonizing transcription factor	Up	AATF_Up
ILMN_1727540	1.24e-14	1.22e-16	10.0535	27.3786	1.36481	C1orf112	chromosome 1 open reading frame 112	Up	C1orf112_Up
ILMN_2339955	1.26e-14	1.24e-16	-10.0497	27.3602	-1.10764	NR4A2	nuclear receptor subfamily 4 group A member 2	Down	NR4A2_Down
ILMN_1689116	1.31e-14	1.3e-16	-10.0404	27.315	-1.32761	PEMT	phosphatidylethanolamine N-methyltransferase	Down	PEMT_Down
ILMN_2066151	1.44e-14	1.44e-16	-10.0197	27.2143	-1.49736	TEK	TEK receptor tyrosine kinase	Down	TEK_Down
ILMN_1739050	1.5e-14	1.52e-16	-10.0093	27.1635	-2.38173	PIPOX	pipecolic acid and sarcosine oxidase	Down	PIPOX_Down
ILMN_2388272	1.52e-14	1.53e-16	10.007	27.1524	1.05174	MED24	mediator complex subunit 24	Up	MED24_Up
ILMN_1811997	1.6e-14	1.62e-16	9.9953	27.0955	1.32521	RNF115	ring finger protein 115	Up	RNF115_Up
ILMN_2103591	1.7e-14	1.75e-16	9.98045	27.0232	1.01266	MORC2	MORC family CW-type zinc finger 2	Up	MORC2_Up
ILMN_1670572	1.74e-14	1.8e-16	-9.97502	26.9968	-1.9418	IDO2	indoleamine 2,3-dioxygenase 2	Down	IDO2_Down
ILMN_1670652	1.75e-14	1.81e-16	-9.97347	26.9892	-3.29625	CYP2C9	cytochrome P450 family 2 subfamily C member 9	Down	CYP2C9_Down
ILMN_1699421	1.77e-14	1.83e-16	-9.97102	26.9773	-2.62981	ANXA10	annexin A10	Down	ANXA10_Down
ILMN_1813766	1.78e-14	1.85e-16	-9.96852	26.9651	-2.04435	RCL1	RNA terminal phosphate cyclase like 1	Down	RCL1_Down
ILMN_1675594	1.82e-14	1.9e-16	9.96363	26.9413	1.05816	YY1AP1	YY1 associated protein 1	Up	YY1AP1_Up
ILMN_1766914	1.92e-14	2.01e-16	-9.95242	26.8868	-2.32687	MFAP4	microfibrillar associated protein 4	Down	MFAP4_Down
ILMN_1723087	1.95e-14	2.04e-16	9.94898	26.8701	1.9924	MDK	midkine (neurite growth-promoting factor 2)	Up	MDK_Up
ILMN_1740957	1.97e-14	2.07e-16	9.94652	26.8581	1.05225	NVL	nuclear VCP-like	Up	NVL_Up
ILMN_1651826	2.12e-14	2.24e-16	-9.93044	26.7798	-1.75642	BASP1	brain abundant membrane attached signal protein 1	Down	BASP1_Down
ILMN_1739001	2.2e-14	2.34e-16	-9.92168	26.7371	-1.73086	TACSTD2	tumor-associated calcium signal transducer 2	Down	TACSTD2_Down
ILMN_1697694	2.2e-14	2.34e-16	9.92103	26.734	1.23486	ATP6AP1	ATPase H+ transporting accessory protein 1	Up	ATP6AP1_Up
ILMN_1778161	2.46e-14	2.64e-16	-9.8971	26.6175	-1.64681	DNAJC25	DnaJ heat shock protein family (Hsp40) member C25	Down	DNAJC25_Down
ILMN_1695404	2.5e-14	2.69e-16	-9.89296	26.5973	-2.55901	LY6E	lymphocyte antigen 6 complex, locus E	Down	LY6E_Down
ILMN_1771224	2.52e-14	2.72e-16	9.89088	26.5872	1.13922	SKA1	spindle and kinetochore associated complex subunit 1	Up	SKA1_Up
ILMN_1777233	2.6e-14	2.81e-16	9.88434	26.5554	1.88629	E2F2	E2F transcription factor 2	Up	E2F2_Up
ILMN_1719286	2.62e-14	2.85e-16	9.88107	26.5395	1.32842	CTSA	cathepsin A	Up	CTSA_Up
ILMN_2181432	2.68e-14	2.92e-16	9.87606	26.5151	1.89439	SPC24	SPC24, NDC80 kinetochore complex component	Up	SPC24_Up
ILMN_2354140	2.77e-14	3.03e-16	9.86865	26.479	1.05929	NAA20	N(alpha)-acetyltransferase 20, NatB catalytic subunit	Up	NAA20_Up
ILMN_1708414	2.8e-14	3.08e-16	9.86551	26.4637	1.23554	GNL3L	G protein nucleolar 3 like	Up	GNL3L_Up
ILMN_1651237	3.3e-14	3.63e-16	9.83199	26.3005	1.72573	CDT1	chromatin licensing and DNA replication factor 1	Up	CDT1_Up
ILMN_1799103	3.3e-14	3.65e-16	9.83112	26.2963	1.16852	SNRPB	small nuclear ribonucleoprotein polypeptides B and B1	Up	SNRPB_Up
ILMN_1651498	3.32e-14	3.69e-16	-9.82907	26.2863	-2.35618	GADD45G	growth arrest and DNA damage inducible gamma	Down	GADD45G_Down
ILMN_2228180	3.43e-14	3.83e-16	-9.8213	26.2485	-1.47214	MSRA	methionine sulfoxide reductase A	Down	MSRA_Down
ILMN_1668814	3.51e-14	3.93e-16	9.81597	26.2225	1.51937	CENPM	centromere protein M	Up	CENPM_Up
ILMN_1713124	3.58e-14	4.04e-16	9.81072	26.1969	1.20556	AKR1C3	aldo-keto reductase family 1, member C3	Up	AKR1C3_Up
ILMN_1716400	4.01e-14	4.55e-16	9.78653	26.0791	1.24548	FOXM1	forkhead box M1	Up	FOXM1_Up
ILMN_2215194	4.04e-14	4.61e-16	-9.78376	26.0657	-1.04478	GCLC	glutamate-cysteine ligase catalytic subunit	Down	GCLC_Down
ILMN_2334693	4.13e-14	4.71e-16	9.77924	26.0437	1.417	NARF	nuclear prelamin A recognition factor	Up	NARF_Up
ILMN_1747442	4.15e-14	4.75e-16	-9.7777	26.0362	-1.16962	P4HA1	prolyl 4-hydroxylase subunit alpha 1	Down	P4HA1_Down
ILMN_1776325	4.29e-14	4.93e-16	9.77007	25.999	1.01604	UBE2Q1	ubiquitin conjugating enzyme E2 Q1	Up	UBE2Q1_Up
ILMN_1696749	4.35e-14	5.03e-16	9.766	25.9792	1.62984	LMNA	lamin A/C	Up	LMNA_Up
ILMN_2375651	4.42e-14	5.12e-16	9.76234	25.9613	1.11029	SCNM1	sodium channel modifier 1	Up	SCNM1_Up
ILMN_1671295	4.54e-14	5.28e-16	-9.75615	25.9313	-1.54186	CCDC3	coiled-coil domain containing 3	Down	CCDC3_Down
ILMN_1701361	4.57e-14	5.33e-16	-9.75432	25.9223	-1.1265	LURAP1L	leucine rich adaptor protein 1 like	Down	LURAP1L_Down
ILMN_1665909	4.65e-14	5.43e-16	9.75053	25.9038	1.01116	LASP1	LIM and SH3 protein 1	Up	LASP1_Up
ILMN_1769129	4.67e-14	5.47e-16	-9.749	25.8964	-2.08747	CCL19	C-C motif chemokine ligand 19	Down	CCL19_Down
ILMN_2139816	4.7e-14	5.52e-16	9.74742	25.8887	1.15427	GPSM2	G-protein signaling modulator 2	Up	GPSM2_Up
ILMN_1712487	4.7e-14	5.53e-16	9.74675	25.8854	1.05755	EIF2D	eukaryotic translation initiation factor 2D	Up	EIF2D_Up
ILMN_2089752	5.36e-14	6.35e-16	-9.71884	25.7496	-1.40256	FAM150B	family with sequence similarity 150 member B	Down	FAM150B_Down
ILMN_1776674	5.48e-14	6.51e-16	9.71374	25.7247	1.18175	SAC3D1	SAC3 domain containing 1	Up	SAC3D1_Up
ILMN_1708340	6.05e-14	7.22e-16	-9.69276	25.6226	-1.14581	DAPK1	death associated protein kinase 1	Down	DAPK1_Down
ILMN_1796949	6.39e-14	7.67e-16	9.68051	25.5629	1.31396	TPX2	TPX2, microtubule nucleation factor	Up	TPX2_Up
ILMN_1795639	6.43e-14	7.74e-16	-9.67886	25.5549	-1.98885	MGMT	O-6-methylguanine-DNA methyltransferase	Down	MGMT_Down
ILMN_1655930	6.74e-14	8.14e-16	-9.66865	25.5051	-1.51605	ELL2	elongation factor for RNA polymerase II 2	Down	ELL2_Down
ILMN_1801257	7.4e-14	8.94e-16	9.64948	25.4118	1.00064	CENPA	centromere protein A	Up	CENPA_Up
ILMN_1776490	7.67e-14	9.31e-16	9.64135	25.3722	1.42672	C17orf53	chromosome 17 open reading frame 53	Up	C17orf53_Up
ILMN_1751328	7.71e-14	9.38e-16	9.6398	25.3647	1.80796	FAM83H	family with sequence similarity 83 member H	Up	FAM83H_Up
ILMN_1653028	8e-14	9.75e-16	9.63193	25.3263	1.55027	COL4A1	collagen type IV alpha 1 chain	Up	COL4A1_Up
ILMN_2196984	8.67e-14	1.06e-15	9.61424	25.2402	1.32249	OIP5	Opa interacting protein 5	Up	OIP5_Up
ILMN_1727532	8.67e-14	1.07e-15	-9.61387	25.2384	-1.39689	OLFML3	olfactomedin like 3	Down	OLFML3_Down
ILMN_1709237	9.14e-14	1.13e-15	-9.60185	25.1798	-1.85406	EPHX2	epoxide hydrolase 2	Down	EPHX2_Down
ILMN_2092118	9.18e-14	1.14e-15	-9.6005	25.1733	-1.25265	FPR1	formyl peptide receptor 1	Down	FPR1_Down
ILMN_1656452	9.63e-14	1.2e-15	9.59031	25.1236	1.28855	C16orf59	chromosome 16 open reading frame 59	Up	C16orf59_Up
ILMN_1698243	9.85e-14	1.23e-15	9.58541	25.0998	1.23298	GLMP	glycosylated lysosomal membrane protein	Up	GLMP_Up
ILMN_1771376	9.95e-14	1.24e-15	9.58279	25.087	1.18345	PEA15	phosphoprotein enriched in astrocytes 15	Up	PEA15_Up
ILMN_2331087	9.97e-14	1.25e-15	-9.5819	25.0827	-1.46883	MS4A7	membrane spanning 4-domains A7	Down	MS4A7_Down
ILMN_1735930	1.01e-13	1.26e-15	-9.57982	25.0726	-1.69098	KLF2	Kruppel like factor 2	Down	KLF2_Down
ILMN_1678643	1.01e-13	1.27e-15	-9.57797	25.0635	-1.47842	FHL2	four and a half LIM domains 2	Down	FHL2_Down
ILMN_1751811	1.02e-13	1.29e-15	-9.57478	25.048	-2.07597	PLGLB1	plasminogen-like B1	Down	PLGLB1_Down
ILMN_1775501	1.1e-13	1.4e-15	-9.55894	24.9709	-1.52472	IL1B	interleukin 1 beta	Down	IL1B_Down
ILMN_1777591	1.16e-13	1.48e-15	-9.54772	24.9162	-1.82799	HOGA1	4-hydroxy-2-oxoglutarate aldolase 1	Down	HOGA1_Down
ILMN_1813206	1.16e-13	1.48e-15	-9.54747	24.915	-1.87205	CP	ceruloplasmin (ferroxidase)	Down	CP_Down
ILMN_1703092	1.16e-13	1.48e-15	9.54679	24.9117	1.50101	RECQL4	RecQ like helicase 4	Up	RECQL4_Up
ILMN_1727360	1.21e-13	1.54e-15	-9.53926	24.875	-1.61294	MAOB	monoamine oxidase B	Down	MAOB_Down
ILMN_1736568	1.22e-13	1.56e-15	9.53649	24.8616	1.04515	CASP2	caspase 2	Up	CASP2_Up
ILMN_1790026	1.23e-13	1.58e-15	-9.53385	24.8487	-1.19601	SFRP5	secreted frizzled related protein 5	Down	SFRP5_Down
ILMN_1663541	1.25e-13	1.61e-15	9.53023	24.8311	1.09267	B4GALT7	beta-1,4-galactosyltransferase 7	Up	B4GALT7_Up
ILMN_1735192	1.27e-13	1.64e-15	-9.52683	24.8145	-1.89893	COLEC11	collectin subfamily member 11	Down	COLEC11_Down
ILMN_2122420	1.29e-13	1.67e-15	-9.52235	24.7927	-1.17645	HMGCL	3-hydroxymethyl-3-methylglutaryl-CoA lyase	Down	HMGCL_Down
ILMN_1806867	1.32e-13	1.73e-15	9.51614	24.7625	1.05696	PPM1G	protein phosphatase, Mg2+/Mn2+ dependent 1G	Up	PPM1G_Up
ILMN_1657509	1.33e-13	1.74e-15	9.51495	24.7567	1.20349	TSEN54	tRNA splicing endonuclease subunit 54	Up	TSEN54_Up
ILMN_1676946	1.34e-13	1.76e-15	9.51256	24.745	1.1287	AP3M2	adaptor related protein complex 3 mu 2 subunit	Up	AP3M2_Up
ILMN_1774375	1.37e-13	1.8e-15	-9.50806	24.7231	-2.32307	SMIM24	small integral membrane protein 24	Down	SMIM24_Down
ILMN_1722648	1.49e-13	1.96e-15	9.4905	24.6376	1.17455	SF3B4	splicing factor 3b subunit 4	Up	SF3B4_Up
ILMN_1658015	1.59e-13	2.11e-15	-9.47506	24.5624	-1.28756	MBNL2	muscleblind like splicing regulator 2	Down	MBNL2_Down
ILMN_1807016	1.66e-13	2.21e-15	-9.46576	24.5172	-1.39787	LHX2	LIM homeobox 2	Down	LHX2_Down
ILMN_1784655	1.91e-13	2.58e-15	9.43476	24.3662	1.50727	TLCD1	TLC domain containing 1	Up	TLCD1_Up
ILMN_1789003	1.91e-13	2.58e-15	-9.4345	24.365	-2.05592	CPB2	carboxypeptidase B2	Down	CPB2_Down
ILMN_1753342	1.96e-13	2.65e-15	-9.4292	24.3392	-1.36788	SAT1	spermidine/spermine N1-acetyltransferase 1	Down	SAT1_Down
ILMN_1893846	2.21e-13	3.02e-15	-9.40293	24.2113	-1.46474	A1CF	APOBEC1 complementation factor	Down	A1CF_Down
ILMN_1740402	2.25e-13	3.08e-15	-9.39858	24.1901	-2.00864	HAO2	hydroxyacid oxidase 2	Down	HAO2_Down
ILMN_1708906	2.58e-13	3.6e-15	9.3674	24.0383	1.13798	CNOT11	CCR4-NOT transcription complex subunit 11	Up	CNOT11_Up
ILMN_1753467	2.77e-13	3.87e-15	9.35224	23.9645	1.01999	SAMD4B	sterile alpha motif domain containing 4B	Up	SAMD4B_Up
ILMN_1781560	3.14e-13	4.42e-15	-9.32567	23.8352	-1.41804	ST3GAL6	ST3 beta-galactoside alpha-2,3-sialyltransferase 6	Down	ST3GAL6_Down
ILMN_1665384	3.45e-13	4.89e-15	9.305	23.7346	1.41777	SH3BP5L	SH3 binding domain protein 5 like	Up	SH3BP5L_Up
ILMN_1718968	3.47e-13	4.93e-15	-9.30321	23.7259	-2.89321	MT1E	metallothionein 1E	Down	MT1E_Down
ILMN_2197365	3.51e-13	5e-15	-9.30052	23.7128	-2.26432	RGS2	regulator of G-protein signaling 2	Down	RGS2_Down
ILMN_1789123	3.79e-13	5.41e-15	9.28463	23.6355	1.06523	PLK4	polo like kinase 4	Up	PLK4_Up
ILMN_1715991	4.04e-13	5.8e-15	-9.27033	23.5659	-1.15321	SDPR	serum deprivation response	Down	SDPR_Down
ILMN_1763144	4.19e-13	6.03e-15	9.2624	23.5273	1.12949	NEU1	neuraminidase 1 (lysosomal sialidase)	Up	NEU1_Up
ILMN_1749432	4.61e-13	6.69e-15	-9.24133	23.4248	-1.32814	MRPL32	mitochondrial ribosomal protein L32	Down	MRPL32_Down
ILMN_2172174	5.1e-13	7.45e-15	-9.21961	23.3191	-1.24504	PNP	purine nucleoside phosphorylase	Down	PNP_Down
ILMN_1720771	5.13e-13	7.51e-15	-9.21803	23.3114	-1.11179	STX11	syntaxin 11	Down	STX11_Down
ILMN_2183510	5.15e-13	7.55e-15	9.21693	23.3061	1.20052	MANF	mesencephalic astrocyte derived neurotrophic factor	Up	MANF_Up
ILMN_1695181	5.17e-13	7.59e-15	9.21598	23.3014	1.00483	SCRIB	scribbled planar cell polarity protein	Up	SCRIB_Up
ILMN_2192683	5.34e-13	7.86e-15	9.20873	23.2662	1.15703	DHX37	DEAH-box helicase 37	Up	DHX37_Up
ILMN_1790891	5.5e-13	8.12e-15	9.20213	23.2341	1.16822	CKAP4	cytoskeleton associated protein 4	Up	CKAP4_Up
ILMN_2066858	5.98e-13	8.97e-15	-9.18202	23.1362	-1.0747	TNFSF13B	tumor necrosis factor superfamily member 13b	Down	TNFSF13B_Down
ILMN_2141482	6.22e-13	9.35e-15	-9.17361	23.0953	-1.70746	SERPINF1	serpin family F member 1	Down	SERPINF1_Down
ILMN_1785635	6.32e-13	9.52e-15	9.1699	23.0773	1.33168	BRD3	bromodomain containing 3	Up	BRD3_Up
ILMN_1670238	6.72e-13	1.02e-14	9.15542	23.0069	1.46511	CDC45	cell division cycle 45	Up	CDC45_Up
ILMN_1695446	6.72e-13	1.02e-14	-9.15514	23.0055	-1.28777	AMBP	alpha-1-microglobulin/bikunin precursor	Down	AMBP_Down
ILMN_1704353	6.75e-13	1.03e-14	9.1532	22.9961	1.5079	IGSF3	immunoglobulin superfamily member 3	Up	IGSF3_Up
ILMN_1732516	6.83e-13	1.05e-14	9.14972	22.9792	1.60075	KNTC1	kinetochore associated 1	Up	KNTC1_Up
ILMN_2090802	6.94e-13	1.07e-14	9.14613	22.9617	1.28178	TMEM79	transmembrane protein 79	Up	TMEM79_Up
ILMN_1810228	7.06e-13	1.1e-14	9.1415	22.9392	1.08955	TTF2	transcription termination factor 2	Up	TTF2_Up
ILMN_1764361	7.1e-13	1.1e-14	-9.14014	22.9326	-1.11082	DUSP16	dual specificity phosphatase 16	Down	DUSP16_Down
ILMN_2199439	7.41e-13	1.15e-14	-9.13117	22.889	-2.23426	CA2	carbonic anhydrase 2	Down	CA2_Down
ILMN_1693009	7.41e-13	1.16e-14	-9.13068	22.8866	-1.57146	FGL2	fibrinogen like 2	Down	FGL2_Down
ILMN_1669281	7.51e-13	1.17e-14	9.12766	22.8719	1.2373	CLN3	CLN3, battenin	Up	CLN3_Up
ILMN_1791306	7.53e-13	1.18e-14	-9.12677	22.8676	-1.2755	IDNK	IDNK, gluconokinase	Down	IDNK_Down
ILMN_1815169	7.72e-13	1.21e-14	9.12137	22.8413	1.36649	MCM5	minichromosome maintenance complex component 5	Up	MCM5_Up
ILMN_2401352	7.91e-13	1.24e-14	9.11571	22.8138	1.47392	UHRF1	ubiquitin like with PHD and ring finger domains 1	Up	UHRF1_Up
ILMN_1740291	8.41e-13	1.32e-14	9.10294	22.7517	1.29309	POLQ	DNA polymerase theta	Up	POLQ_Up
ILMN_1680424	8.66e-13	1.36e-14	-9.0968	22.7219	-1.05772	CTSG	cathepsin G	Down	CTSG_Down
ILMN_1761058	8.81e-13	1.39e-14	-9.09265	22.7017	-1.37366	ACAD11	acyl-CoA dehydrogenase family member 11	Down	ACAD11_Down
ILMN_1719165	8.81e-13	1.39e-14	9.09257	22.7013	1.02972	BRMS1	breast cancer metastasis suppressor 1	Up	BRMS1_Up
ILMN_1762735	8.85e-13	1.4e-14	-9.09136	22.6954	-1.3838	EVC2	EvC ciliary complex subunit 2	Down	EVC2_Down
ILMN_1786125	8.96e-13	1.42e-14	9.08853	22.6816	1.56404	CCNA2	cyclin A2	Up	CCNA2_Up
ILMN_1781943	9.16e-13	1.46e-14	9.08269	22.6533	1.44028	FAM83D	family with sequence similarity 83 member D	Up	FAM83D_Up
ILMN_1742147	9.22e-13	1.48e-14	9.08076	22.6439	1.46682	UBL4A	ubiquitin like 4A	Up	UBL4A_Up
ILMN_2409167	9.72e-13	1.57e-14	9.06862	22.5849	1.29457	ANXA2	annexin A2	Up	ANXA2_Up
ILMN_1807600	9.82e-13	1.59e-14	9.06614	22.5728	1.30349	NPLOC4	NPL4 homolog, ubiquitin recognition factor	Up	NPLOC4_Up
ILMN_1762899	1e-12	1.62e-14	-9.06161	22.5508	-2.10831	EGR1	early growth response 1	Down	EGR1_Down
ILMN_1737514	1.07e-12	1.75e-14	-9.04639	22.4769	-1.69402	KYNU	kynureninase	Down	KYNU_Down
ILMN_1666924	1.09e-12	1.78e-14	-9.04302	22.4605	-1.07153	PINK1	PTEN induced putative kinase 1	Down	PINK1_Down
ILMN_1718336	1.11e-12	1.82e-14	9.03791	22.4357	1.05118	C7orf50	chromosome 7 open reading frame 50	Up	C7orf50_Up
ILMN_1812678	1.14e-12	1.89e-14	-9.03097	22.4019	-1.17579	AGMO	alkylglycerol monooxygenase	Down	AGMO_Down
ILMN_1738656	1.17e-12	1.94e-14	-9.02591	22.3773	-1.63244	GLOD4	glyoxalase domain containing 4	Down	GLOD4_Down
ILMN_1749738	1.22e-12	2.03e-14	9.01625	22.3304	1.32094	NECAB3	N-terminal EF-hand calcium binding protein 3	Up	NECAB3_Up
ILMN_2363165	1.23e-12	2.06e-14	9.01291	22.3142	1.02147	TACC2	transforming acidic coiled-coil containing protein 2	Up	TACC2_Up
ILMN_2053415	1.3e-12	2.18e-14	-9.00166	22.2595	-1.19171	LDLR	low density lipoprotein receptor	Down	LDLR_Down
ILMN_1742262	1.35e-12	2.27e-14	8.99393	22.222	1.42859	CEP131	centrosomal protein 131	Up	CEP131_Up
ILMN_2186369	1.49e-12	2.51e-14	-8.97306	22.1206	-1.34043	NCOR1	nuclear receptor corepressor 1	Down	NCOR1_Down
ILMN_1808789	1.52e-12	2.56e-14	8.96922	22.1019	1.1587	MYO5C	myosin VC	Up	MYO5C_Up
ILMN_1710937	1.57e-12	2.66e-14	-8.96124	22.0632	-1.2306	IFI16	interferon gamma inducible protein 16	Down	IFI16_Down
ILMN_2075334	1.61e-12	2.73e-14	8.95571	22.0363	1.34478	HIST1H4C	histone cluster 1, H4c	Up	HIST1H4C_Up
ILMN_2048700	1.65e-12	2.82e-14	8.94957	22.0065	1.40407	ATAD2	ATPase family, AAA domain containing 2	Up	ATAD2_Up
ILMN_1802843	1.7e-12	2.92e-14	8.9426	21.9726	1.0991	PRCC	papillary renal cell carcinoma (translocation-associated)	Up	PRCC_Up
ILMN_1715401	1.74e-12	2.99e-14	-8.93755	21.9482	-3.83905	MT1G	metallothionein 1G	Down	MT1G_Down
ILMN_1726565	1.78e-12	3.06e-14	8.93289	21.9255	1.41843	PIK3R2	phosphoinositide-3-kinase regulatory subunit 2	Up	PIK3R2_Up
ILMN_1761511	1.8e-12	3.1e-14	-8.93055	21.9141	-2.30039	APOH	apolipoprotein H	Down	APOH_Down
ILMN_1689800	2.11e-12	3.66e-14	8.89636	21.7482	1.10061	MRTO4	MRT4 homolog, ribosome maturation factor	Up	MRTO4_Up
ILMN_1776516	2.14e-12	3.72e-14	8.89297	21.7317	2.06834	ITPKA	inositol-trisphosphate 3-kinase A	Up	ITPKA_Up
ILMN_1735347	2.38e-12	4.17e-14	-8.87022	21.6213	-1.19821	MCEE	methylmalonyl-CoA epimerase	Down	MCEE_Down
ILMN_1769702	2.43e-12	4.27e-14	8.86511	21.5965	1.26256	GPAA1	glycosylphosphatidylinositol anchor attachment 1	Up	GPAA1_Up
ILMN_1769658	2.44e-12	4.28e-14	8.86446	21.5934	1.00157	LYSMD4	LysM domain containing 4	Up	LYSMD4_Up
ILMN_1781536	2.46e-12	4.33e-14	-8.86218	21.5823	-1.25482	FAH	fumarylacetoacetate hydrolase	Down	FAH_Down
ILMN_1722829	2.49e-12	4.38e-14	-8.85979	21.5707	-1.71671	HLF	HLF, PAR bZIP transcription factor	Down	HLF_Down
ILMN_1779401	2.52e-12	4.45e-14	-8.85683	21.5563	-1.51957	CHP1	calcineurin like EF-hand protein 1	Down	CHP1_Down
ILMN_1708016	2.6e-12	4.6e-14	-8.84996	21.523	-1.74264	FAM210B	family with sequence similarity 210 member B	Down	FAM210B_Down
ILMN_2081162	2.6e-12	4.62e-14	-8.84897	21.5182	-1.1084	SH3BGRL	SH3 domain binding glutamate rich protein like	Down	SH3BGRL_Down
ILMN_1694731	2.63e-12	4.68e-14	8.84668	21.5071	1.03846	CLCN7	chloride voltage-gated channel 7	Up	CLCN7_Up
ILMN_1733288	2.68e-12	4.79e-14	-8.84187	21.4837	-1.26452	C1RL	complement C1r subcomponent like	Down	C1RL_Down
ILMN_1668910	2.73e-12	4.88e-14	-8.83818	21.4659	-1.75901	CIDEB	cell death-inducing DFFA-like effector b	Down	CIDEB_Down
ILMN_2041577	2.75e-12	4.92e-14	8.83626	21.4565	1.1625	SLC52A2	solute carrier family 52 member 2	Up	SLC52A2_Up
ILMN_2086077	2.87e-12	5.15e-14	-8.827	21.4116	-1.3473	JUNB	JunB proto-oncogene, AP-1 transcription factor subunit	Down	JUNB_Down
ILMN_1810901	2.91e-12	5.24e-14	8.82345	21.3944	1.37553	RNASEH2A	ribonuclease H2 subunit A	Up	RNASEH2A_Up
ILMN_1791576	2.96e-12	5.33e-14	-8.82018	21.3785	-1.1982	CHSY1	chondroitin sulfate synthase 1	Down	CHSY1_Down
ILMN_1766637	3.1e-12	5.62e-14	8.8093	21.3258	1.28253	GLA	galactosidase alpha	Up	GLA_Up
ILMN_1806403	3.11e-12	5.65e-14	8.80832	21.3211	1.15185	RASL12	RAS like family 12	Up	RASL12_Up
ILMN_1772446	3.21e-12	5.83e-14	8.80185	21.2897	1.02946	FAM222A	family with sequence similarity 222 member A	Up	FAM222A_Up
ILMN_1718558	3.33e-12	6.06e-14	8.79387	21.251	1.23845	PARP12	poly(ADP-ribose) polymerase family member 12	Up	PARP12_Up
ILMN_1797482	3.39e-12	6.21e-14	-8.78889	21.2268	-1.33932	GCDH	glutaryl-CoA dehydrogenase	Down	GCDH_Down
ILMN_1743747	3.45e-12	6.33e-14	8.78517	21.2088	1.13213	RUSC1	RUN and SH3 domain containing 1	Up	RUSC1_Up
ILMN_1687978	3.49e-12	6.42e-14	-8.78226	21.1947	-2.04477	PHLDA1	pleckstrin homology like domain family A member 1	Down	PHLDA1_Down
ILMN_1734929	3.52e-12	6.5e-14	-8.77972	21.1824	-2.13175	BBOX1	gamma-butyrobetaine hydroxylase 1	Down	BBOX1_Down
ILMN_1738816	3.82e-12	7.09e-14	-8.76207	21.0968	-1.28122	FOXO1	forkhead box O1	Down	FOXO1_Down
ILMN_1684982	3.91e-12	7.28e-14	-8.75664	21.0705	-2.50461	PDK4	pyruvate dehydrogenase kinase 4	Down	PDK4_Down
ILMN_1764175	4.15e-12	7.75e-14	-8.74387	21.0086	-1.14271	GPD1	glycerol-3-phosphate dehydrogenase 1	Down	GPD1_Down
ILMN_1683792	4.28e-12	8.01e-14	-8.73731	20.9768	-1.82559	LAP3	leucine aminopeptidase 3	Down	LAP3_Down
ILMN_1778104	4.34e-12	8.13e-14	-8.73418	20.9616	-1.81927	ACADM	acyl-CoA dehydrogenase, C-4 to C-12 straight chain	Down	ACADM_Down
ILMN_1807283	4.4e-12	8.26e-14	8.73094	20.9459	1.49851	NDST1	N-deacetylase and N-sulfotransferase 1	Up	NDST1_Up
ILMN_1767111	4.42e-12	8.32e-14	8.7296	20.9394	1.24624	ANO10	anoctamin 10	Up	ANO10_Up
ILMN_1811598	4.53e-12	8.56e-14	-8.72369	20.9108	-2.87919	ADH1B	alcohol dehydrogenase 1B (class I), beta polypeptide	Down	ADH1B_Down
ILMN_2074258	4.53e-12	8.56e-14	8.72359	20.9103	1.2858	BARD1	BRCA1 associated RING domain 1	Up	BARD1_Up
ILMN_1790136	5.28e-12	1e-13	8.69104	20.7526	1.2473	MRGBP	MRG/MORF4L binding protein	Up	MRGBP_Up
ILMN_2289849	5.35e-12	1.02e-13	-8.68795	20.7377	-1.11988	FCGR2A	Fc fragment of IgG receptor IIa	Down	FCGR2A_Down
ILMN_1695334	5.37e-12	1.03e-13	8.68694	20.7328	1.03929	PYGO2	pygopus family PHD finger 2	Up	PYGO2_Up
ILMN_1666594	5.49e-12	1.05e-13	-8.68226	20.7101	-1.57096	IRF8	interferon regulatory factor 8	Down	IRF8_Down
ILMN_1698487	5.51e-12	1.05e-13	-8.68116	20.7048	-1.78855	SDHD	succinate dehydrogenase complex subunit D	Down	SDHD_Down
ILMN_1704452	5.57e-12	1.07e-13	8.67821	20.6905	1.29009	BCL9	B-cell CLL/lymphoma 9	Up	BCL9_Up
ILMN_1678619	5.61e-12	1.08e-13	-8.67648	20.6821	-1.45693	TKFC	triokinase and FMN cyclase	Down	TKFC_Down
ILMN_1790689	5.61e-12	1.08e-13	-8.67634	20.6815	-1.88863	CRISPLD2	cysteine rich secretory protein LCCL domain containing 2	Down	CRISPLD2_Down
ILMN_1760347	6.01e-12	1.17e-13	-8.65971	20.6009	-2.0608	SRGN	serglycin	Down	SRGN_Down
ILMN_1665117	6.1e-12	1.19e-13	8.65641	20.585	1.01513	C6orf89	chromosome 6 open reading frame 89	Up	C6orf89_Up
ILMN_1699357	6.22e-12	1.22e-13	8.65154	20.5614	1.02519	SLC22A5	solute carrier family 22 member 5	Up	SLC22A5_Up
ILMN_1695316	6.35e-12	1.25e-13	-8.6469	20.539	-1.1097	SLC39A8	solute carrier family 39 member 8	Down	SLC39A8_Down
ILMN_2381697	7.36e-12	1.47e-13	8.61413	20.3804	1.23827	P4HA2	prolyl 4-hydroxylase subunit alpha 2	Up	P4HA2_Up
ILMN_1715583	7.5e-12	1.5e-13	8.60977	20.3592	1.31469	BOP1	block of proliferation 1	Up	BOP1_Up
ILMN_1746883	7.68e-12	1.54e-13	-8.60407	20.3317	-2.13871	SAT2	spermidine/spermine N1-acetyltransferase family member 2	Down	SAT2_Down
ILMN_1795325	7.68e-12	1.54e-13	8.60377	20.3302	1.47829	ACTG2	actin, gamma 2, smooth muscle, enteric	Up	ACTG2_Up
ILMN_2074748	8.16e-12	1.65e-13	-8.58979	20.2626	-1.80211	HAL	histidine ammonia-lyase	Down	HAL_Down
ILMN_1800468	8.51e-12	1.73e-13	-8.5809	20.2196	-1.98862	KLKB1	kallikrein B1	Down	KLKB1_Down
ILMN_2393169	8.72e-12	1.77e-13	8.57539	20.1929	1.10156	THOC5	THO complex 5	Up	THOC5_Up
ILMN_1678579	9.19e-12	1.88e-13	-8.56303	20.1332	-1.09206	CPT2	carnitine palmitoyltransferase 2	Down	CPT2_Down
ILMN_2051972	9.64e-12	1.98e-13	8.55276	20.0835	2.9393	GPC3	glypican 3	Up	GPC3_Up
ILMN_1654068	9.76e-12	2.01e-13	8.54966	20.0685	1.01752	NUDT1	nudix hydrolase 1	Up	NUDT1_Up
ILMN_1672443	1e-11	2.07e-13	-8.54401	20.0412	-1.70268	QDPR	quinoid dihydropteridine reductase	Down	QDPR_Down
ILMN_1652379	1.06e-11	2.19e-13	-8.53247	19.9855	-1.7889	SUCLG2	succinate-CoA ligase GDP-forming beta subunit	Down	SUCLG2_Down
ILMN_1686748	1.08e-11	2.25e-13	8.52634	19.9559	1.15659	TMEM9	transmembrane protein 9	Up	TMEM9_Up
ILMN_1696339	1.09e-11	2.28e-13	8.52431	19.9461	1.93572	ZIC2	Zic family member 2	Up	ZIC2_Up
ILMN_2104877	1.11e-11	2.31e-13	-8.52103	19.9302	-1.39431	CMPK1	cytidine/uridine monophosphate kinase 1	Down	CMPK1_Down
ILMN_1708101	1.11e-11	2.32e-13	8.52065	19.9283	1.2445	LMNB2	lamin B2	Up	LMNB2_Up
ILMN_1773073	1.11e-11	2.33e-13	-8.51985	19.9245	-1.44904	PHYH	phytanoyl-CoA 2-hydroxylase	Down	PHYH_Down
ILMN_1729191	1.21e-11	2.57e-13	-8.49979	19.8276	-1.15332	CYP2C19	cytochrome P450 family 2 subfamily C member 19	Down	CYP2C19_Down
ILMN_1669409	1.22e-11	2.61e-13	-8.49665	19.8124	-1.34572	VSIG4	V-set and immunoglobulin domain containing 4	Down	VSIG4_Down
ILMN_2203271	1.27e-11	2.72e-13	-8.48826	19.7719	-1.02789	FPR3	formyl peptide receptor 3	Down	FPR3_Down
ILMN_1801077	1.28e-11	2.75e-13	-8.486	19.761	-1.55828	PLIN2	perilipin 2	Down	PLIN2_Down
ILMN_1715742	1.37e-11	2.98e-13	-8.46959	19.6817	-2.85399	SLC22A1	solute carrier family 22 member 1	Down	SLC22A1_Down
ILMN_1782084	1.41e-11	3.06e-13	8.46382	19.6538	1.91475	ALG1L	ALG1, chitobiosyldiphosphodolichol beta-mannosyltransferase like	Up	ALG1L_Up
ILMN_2184184	1.46e-11	3.19e-13	-8.45558	19.6141	-1.67691	ANXA1	annexin A1	Down	ANXA1_Down
ILMN_1779875	1.47e-11	3.22e-13	8.45375	19.6052	1.42735	THY1	Thy-1 cell surface antigen	Up	THY1_Up
ILMN_1672843	1.5e-11	3.29e-13	-8.44912	19.5829	-1.18849	FBXO8	F-box protein 8	Down	FBXO8_Down
ILMN_1777797	1.54e-11	3.38e-13	-8.44364	19.5564	-2.46128	AFM	afamin	Down	AFM_Down
ILMN_1787266	1.6e-11	3.53e-13	8.43482	19.5139	4.21366	SPINK1	serine peptidase inhibitor, Kazal type 1	Up	SPINK1_Up
ILMN_2136010	1.77e-11	3.93e-13	-8.41296	19.4084	-3.35107	ADH4	alcohol dehydrogenase 4 (class II), pi polypeptide	Down	ADH4_Down
ILMN_1730777	1.8e-11	4.02e-13	-8.40842	19.3865	-1.41014	KRT19	keratin 19	Down	KRT19_Down
ILMN_1912737	1.88e-11	4.19e-13	8.39967	19.3443	1.15745	HIPK2	homeodomain interacting protein kinase 2	Up	HIPK2_Up
ILMN_1804656	1.95e-11	4.37e-13	-8.39134	19.3041	-1.27289	COX14	COX14, cytochrome c oxidase assembly factor	Down	COX14_Down
ILMN_1656011	2e-11	4.49e-13	-8.38566	19.2768	-1.79423	RGS1	regulator of G-protein signaling 1	Down	RGS1_Down
ILMN_1659564	2.01e-11	4.53e-13	8.38393	19.2684	1.09945	SEC61A1	Sec61 translocon alpha 1 subunit	Up	SEC61A1_Up
ILMN_2208413	2.02e-11	4.55e-13	-8.38299	19.2639	-1.05484	ARHGAP15	Rho GTPase activating protein 15	Down	ARHGAP15_Down
ILMN_1754894	2.06e-11	4.65e-13	-8.37852	19.2423	-1.30952	C1orf162	chromosome 1 open reading frame 162	Down	C1orf162_Down
ILMN_2121774	2.16e-11	4.89e-13	-8.36824	19.1928	-1.59469	ZG16	zymogen granule protein 16	Down	ZG16_Down
ILMN_1800697	2.35e-11	5.37e-13	-8.34895	19.0998	-1.23685	LDB2	LIM domain binding 2	Down	LDB2_Down
ILMN_1711470	2.43e-11	5.59e-13	8.34087	19.0609	1.2846	UBE2T	ubiquitin conjugating enzyme E2 T	Up	UBE2T_Up
ILMN_1680618	2.49e-11	5.74e-13	-8.33558	19.0354	-1.77613	MYC	v-myc avian myelocytomatosis viral oncogene homolog	Down	MYC_Down
ILMN_1716859	2.91e-11	6.81e-13	-8.30036	18.8658	-2.33059	TDO2	tryptophan 2,3-dioxygenase	Down	TDO2_Down
ILMN_1746763	2.97e-11	6.97e-13	-8.29582	18.8439	-1.0703	ECM2	extracellular matrix protein 2	Down	ECM2_Down
ILMN_1809311	2.97e-11	6.98e-13	-8.29549	18.8423	-2.51435	APOF	apolipoprotein F	Down	APOF_Down
ILMN_1815530	2.97e-11	6.99e-13	-8.29512	18.8405	-1.27808	GCKR	glucokinase (hexokinase 4) regulator	Down	GCKR_Down
ILMN_1659072	3.15e-11	7.43e-13	-8.28264	18.7805	-2.75249	SPP2	secreted phosphoprotein 2	Down	SPP2_Down
ILMN_1793859	3.16e-11	7.46e-13	-8.28175	18.7762	-1.67596	ALDH2	aldehyde dehydrogenase 2 family (mitochondrial)	Down	ALDH2_Down
ILMN_1699665	3.19e-11	7.54e-13	-8.27976	18.7666	-1.19887	CLIC6	chloride intracellular channel 6	Down	CLIC6_Down
ILMN_1812856	3.19e-11	7.56e-13	8.27919	18.7639	1.09032	ZSWIM1	zinc finger SWIM-type containing 1	Up	ZSWIM1_Up
ILMN_1710734	3.47e-11	8.31e-13	-8.25986	18.6709	-1.6602	GZMK	granzyme K	Down	GZMK_Down
ILMN_1784299	3.79e-11	9.08e-13	-8.24154	18.5827	-1.43851	C19orf43	chromosome 19 open reading frame 43	Down	C19orf43_Down
ILMN_1695110	3.87e-11	9.34e-13	8.23585	18.5554	1.65282	BCAT2	branched chain amino acid transaminase 2	Up	BCAT2_Up
ILMN_1788122	3.87e-11	9.34e-13	-8.23576	18.5549	-1.26881	GSTA5	glutathione S-transferase alpha 5	Down	GSTA5_Down
ILMN_1775170	3.87e-11	9.35e-13	-8.23557	18.554	-2.61886	MT1X	metallothionein 1X	Down	MT1X_Down
ILMN_1734696	3.89e-11	9.41e-13	-8.23425	18.5477	-1.03215	FRG1	FSHD region gene 1	Down	FRG1_Down
ILMN_1697448	3.93e-11	9.52e-13	-8.23201	18.5369	-1.51423	TXNIP	thioredoxin interacting protein	Down	TXNIP_Down
ILMN_1757747	4.26e-11	1.04e-12	-8.21375	18.4491	-1.54541	ASPDH	aspartate dehydrogenase domain containing	Down	ASPDH_Down
ILMN_2361603	4.51e-11	1.1e-12	-8.20149	18.3902	-1.12714	NDRG2	NDRG family member 2	Down	NDRG2_Down
ILMN_1755954	4.63e-11	1.14e-12	-8.19587	18.3632	-1.19882	CPEB3	cytoplasmic polyadenylation element binding protein 3	Down	CPEB3_Down
ILMN_1660793	4.64e-11	1.14e-12	8.19522	18.3601	1.74284	PAQR4	progestin and adipoQ receptor family member 4	Up	PAQR4_Up
ILMN_1674236	4.71e-11	1.16e-12	8.19098	18.3397	1.00142	HSPB1	heat shock protein family B (small) member 1	Up	HSPB1_Up
ILMN_1765532	4.8e-11	1.19e-12	8.18697	18.3204	1.41922	NELFE	negative elongation factor complex member E	Up	NELFE_Up
ILMN_1802557	5.23e-11	1.3e-12	-8.16847	18.2316	-1.32625	HEBP1	heme binding protein 1	Down	HEBP1_Down
ILMN_1737308	5.32e-11	1.32e-12	-8.16474	18.2137	-1.37024	GLRX	glutaredoxin	Down	GLRX_Down
ILMN_1742461	5.44e-11	1.35e-12	-8.1598	18.19	-1.15157	UAP1	UDP-N-acetylglucosamine pyrophosphorylase 1	Down	UAP1_Down
ILMN_1695962	5.55e-11	1.39e-12	8.15454	18.1647	1.17068	SLC12A9	solute carrier family 12 member 9	Up	SLC12A9_Up
ILMN_1665686	5.68e-11	1.42e-12	8.14928	18.1395	1.21393	PIEZO2	piezo type mechanosensitive ion channel component 2	Up	PIEZO2_Up
ILMN_1774742	5.75e-11	1.45e-12	-8.14599	18.1237	-2.10082	MTTP	microsomal triglyceride transfer protein	Down	MTTP_Down
ILMN_1692511	5.9e-11	1.49e-12	8.13939	18.092	1.13784	TMEM106C	transmembrane protein 106C	Up	TMEM106C_Up
ILMN_1734631	6.01e-11	1.52e-12	-8.13538	18.0727	-1.38198	CLYBL	citrate lyase beta like	Down	CLYBL_Down
ILMN_1657550	6.05e-11	1.54e-12	8.13383	18.0653	1.16779	MVD	mevalonate diphosphate decarboxylase	Up	MVD_Up
ILMN_2384536	6.22e-11	1.58e-12	-8.12781	18.0364	-1.4849	ECI2	enoyl-CoA delta isomerase 2	Down	ECI2_Down
ILMN_2317463	6.29e-11	1.6e-12	8.12525	18.0241	1.01693	INTS1	integrator complex subunit 1	Up	INTS1_Up
ILMN_1754137	6.41e-11	1.64e-12	-8.12072	18.0024	-1.84947	CFHR1	complement factor H related 1	Down	CFHR1_Down
ILMN_1691892	7.36e-11	1.9e-12	8.09037	17.8568	1.10863	TAGLN2	transgelin 2	Up	TAGLN2_Up
ILMN_1686116	7.38e-11	1.91e-12	-8.08936	17.852	-1.97748	THBS1	thrombospondin 1	Down	THBS1_Down
ILMN_1668510	7.42e-11	1.92e-12	-8.0877	17.844	-2.18545	GLYAT	glycine-N-acyltransferase	Down	GLYAT_Down
ILMN_1651967	7.55e-11	1.96e-12	8.08408	17.8267	1.21209	TP53I3	tumor protein p53 inducible protein 3	Up	TP53I3_Up
ILMN_1791328	7.55e-11	1.96e-12	8.08378	17.8252	1.53597	STK39	serine/threonine kinase 39	Up	STK39_Up
ILMN_1777061	7.66e-11	1.99e-12	-8.08021	17.8081	-1.02396	ZSWIM6	zinc finger SWIM-type containing 6	Down	ZSWIM6_Down
ILMN_1764861	7.74e-11	2.02e-12	-8.07786	17.7969	-1.48492	ISOC1	isochorismatase domain containing 1	Down	ISOC1_Down
ILMN_2148913	8.07e-11	2.11e-12	-8.06891	17.754	-1.52742	TMEM45A	transmembrane protein 45A	Down	TMEM45A_Down
ILMN_1673638	8.07e-11	2.11e-12	-8.06876	17.7532	-1.71124	RPS3A	ribosomal protein S3A	Down	RPS3A_Down
ILMN_1800654	8.45e-11	2.22e-12	8.05806	17.702	1.02569	MCM7	minichromosome maintenance complex component 7	Up	MCM7_Up
ILMN_1765557	8.45e-11	2.22e-12	8.05787	17.7011	1.16894	OLFML2B	olfactomedin like 2B	Up	OLFML2B_Up
ILMN_1821176	8.58e-11	2.26e-12	-8.05418	17.6834	-1.37676	RNF125	ring finger protein 125	Down	RNF125_Down
ILMN_1665775	8.84e-11	2.34e-12	-8.04716	17.6498	-1.24424	MARC2	mitochondrial amidoxime reducing component 2	Down	MARC2_Down
ILMN_2302716	9.09e-11	2.41e-12	8.04086	17.6196	1.30259	ALDH18A1	aldehyde dehydrogenase 18 family member A1	Up	ALDH18A1_Up
ILMN_1806818	9.52e-11	2.55e-12	8.02954	17.5654	1.16356	MCM3	minichromosome maintenance complex component 3	Up	MCM3_Up
ILMN_1696391	9.53e-11	2.55e-12	-8.02925	17.564	-1.51522	LEPR	leptin receptor	Down	LEPR_Down
ILMN_1725427	9.73e-11	2.62e-12	-8.02439	17.5408	-1.63614	B2M	beta-2-microglobulin	Down	B2M_Down
ILMN_2134801	9.74e-11	2.62e-12	-8.02416	17.5397	-1.8636	ETNPPL	ethanolamine-phosphate phospho-lyase	Down	ETNPPL_Down
ILMN_1757631	9.8e-11	2.64e-12	8.02241	17.5313	1.20932	DBNDD1	dysbindin domain containing 1	Up	DBNDD1_Up
ILMN_1690252	1.01e-10	2.74e-12	8.01517	17.4966	1.1397	ALKBH2	alkB homolog 2, alpha-ketoglutarate dependent dioxygenase	Up	ALKBH2_Up
ILMN_1720526	1.05e-10	2.86e-12	8.00594	17.4524	1.18084	CENPN	centromere protein N	Up	CENPN_Up
ILMN_1664565	1.1e-10	2.99e-12	-7.99702	17.4098	-1.88588	PROZ	protein Z, vitamin K dependent plasma glycoprotein	Down	PROZ_Down
ILMN_2197846	1.15e-10	3.14e-12	-7.9866	17.3599	-1.20132	HADHB	hydroxyacyl-CoA dehydrogenase/3-ketoacyl-CoA thiolase/enoyl-CoA hydratase (trifunctional protein), beta subunit	Down	HADHB_Down
ILMN_1711451	1.17e-10	3.21e-12	-7.98215	17.3386	-1.54526	SLC7A2	solute carrier family 7 member 2	Down	SLC7A2_Down
ILMN_2129886	1.3e-10	3.58e-12	-7.95962	17.2309	-1.67016	ABCA8	ATP binding cassette subfamily A member 8	Down	ABCA8_Down
ILMN_1796900	1.34e-10	3.7e-12	7.95297	17.1991	1.02364	NUDCD3	NudC domain containing 3	Up	NUDCD3_Up
ILMN_1664176	1.4e-10	3.9e-12	-7.94201	17.1468	-1.09853	FBLN5	fibulin 5	Down	FBLN5_Down
ILMN_1779252	1.42e-10	3.97e-12	-7.93833	17.1292	-1.44423	TRIM22	tripartite motif containing 22	Down	TRIM22_Down
ILMN_1696187	1.43e-10	3.99e-12	-7.93742	17.1248	-1.5096	PYGL	phosphorylase, glycogen, liver	Down	PYGL_Down
ILMN_1686664	1.45e-10	4.05e-12	-7.93415	17.1092	-1.89562	MT2A	metallothionein 2A	Down	MT2A_Down
ILMN_1666305	1.45e-10	4.07e-12	7.93317	17.1045	1.3707	CDKN3	cyclin dependent kinase inhibitor 3	Up	CDKN3_Up
ILMN_1749213	1.46e-10	4.1e-12	7.9318	17.098	1.10435	SDF2L1	stromal cell derived factor 2 like 1	Up	SDF2L1_Up
ILMN_1778064	1.54e-10	4.36e-12	7.91902	17.0369	1.02133	FICD	FIC domain containing	Up	FICD_Up
ILMN_1683811	1.62e-10	4.59e-12	7.9084	16.9863	1.11571	TNPO3	transportin 3	Up	TNPO3_Up
ILMN_1691175	1.86e-10	5.32e-12	-7.87809	16.8416	-1.99628	ADH6	alcohol dehydrogenase 6 (class V)	Down	ADH6_Down
ILMN_1795104	1.9e-10	5.45e-12	-7.87308	16.8177	-1.2219	ACADS	acyl-CoA dehydrogenase, C-2 to C-3 short chain	Down	ACADS_Down
ILMN_2284744	1.92e-10	5.51e-12	-7.87089	16.8073	-1.0006	HNMT	histamine N-methyltransferase	Down	HNMT_Down
ILMN_1769634	1.95e-10	5.62e-12	7.86664	16.787	1.12737	STRA13	stimulated by retinoic acid 13	Up	STRA13_Up
ILMN_2189815	2e-10	5.77e-12	-7.86144	16.7622	-1.2909	SLC22A10	solute carrier family 22 member 10	Down	SLC22A10_Down
ILMN_1681016	2.03e-10	5.89e-12	7.85704	16.7413	1.2308	SPNS1	sphingolipid transporter 1 (putative)	Up	SPNS1_Up
ILMN_1727348	2.04e-10	5.9e-12	-7.85675	16.7398	-1.07177	NMD3	NMD3 ribosome export adaptor	Down	NMD3_Down
ILMN_1904578	2.06e-10	6e-12	-7.85345	16.7241	-1.15087	TENM1	teneurin transmembrane protein 1	Down	TENM1_Down
ILMN_2151281	2.09e-10	6.07e-12	-7.85078	16.7114	-1.36412	GABARAPL1	GABA type A receptor associated protein like 1	Down	GABARAPL1_Down
ILMN_1785071	2.12e-10	6.18e-12	-7.84732	16.6949	-2.03048	SEPP1	selenoprotein P, plasma, 1	Down	SEPP1_Down
ILMN_2121389	2.15e-10	6.27e-12	-7.84427	16.6803	-1.18377	ACOT1	acyl-CoA thioesterase 1	Down	ACOT1_Down
ILMN_1789638	2.21e-10	6.48e-12	-7.83744	16.6478	-1.83315	MFSD2A	major facilitator superfamily domain containing 2A	Down	MFSD2A_Down
ILMN_1678841	2.31e-10	6.8e-12	7.82758	16.6008	2.01381	UBD	ubiquitin D	Up	UBD_Up
ILMN_1740717	2.4e-10	7.08e-12	-7.81908	16.5604	-2.97131	ADH1C	alcohol dehydrogenase 1C (class I), gamma polypeptide	Down	ADH1C_Down
ILMN_1691156	2.4e-10	7.09e-12	-7.81882	16.5591	-1.90229	MT1A	metallothionein 1A	Down	MT1A_Down
ILMN_1773262	2.55e-10	7.57e-12	7.80533	16.4949	1.09305	ESM1	endothelial cell specific molecule 1	Up	ESM1_Up
ILMN_2065745	2.64e-10	7.87e-12	-7.79718	16.4561	-1.16835	RAMP3	receptor (G protein-coupled) activity modifying protein 3	Down	RAMP3_Down
ILMN_1694268	2.71e-10	8.07e-12	7.792	16.4314	1.01874	HES6	hes family bHLH transcription factor 6	Up	HES6_Up
ILMN_1768480	2.87e-10	8.58e-12	7.77929	16.3709	1.06983	VGLL4	vestigial like family member 4	Up	VGLL4_Up
ILMN_2109416	2.9e-10	8.68e-12	-7.77698	16.36	-1.17564	NAPSB	napsin B aspartic peptidase, pseudogene	Down	NAPSB_Down
ILMN_1712305	3e-10	9.01e-12	-7.76919	16.3229	-1.3539	CYBRD1	cytochrome b reductase 1	Down	CYBRD1_Down
ILMN_1800540	3.02e-10	9.1e-12	-7.76717	16.3133	-1.24562	CD55	CD55 molecule (Cromer blood group)	Down	CD55_Down
ILMN_2069224	3.14e-10	9.49e-12	-7.75852	16.2721	-1.05856	PVALB	parvalbumin	Down	PVALB_Down
ILMN_1862909	3.19e-10	9.69e-12	-7.75432	16.2522	-1.24986	RORA	RAR related orphan receptor A	Down	RORA_Down
ILMN_2365383	3.39e-10	1.03e-11	-7.74089	16.1883	-2.19767	ENO3	enolase 3	Down	ENO3_Down
ILMN_1781285	3.47e-10	1.06e-11	-7.73533	16.1619	-1.71099	DUSP1	dual specificity phosphatase 1	Down	DUSP1_Down
ILMN_1774336	3.48e-10	1.07e-11	7.73463	16.1586	1.19064	POLE2	DNA polymerase epsilon 2, accessory subunit	Up	POLE2_Up
ILMN_1701114	3.84e-10	1.18e-11	-7.71306	16.0562	-1.35413	GBP1	guanylate binding protein 1	Down	GBP1_Down
ILMN_1769388	3.88e-10	1.2e-11	-7.71067	16.0448	-1.76062	GJB2	gap junction protein beta 2	Down	GJB2_Down
ILMN_2130635	3.91e-10	1.21e-11	7.70861	16.035	1.03421	FOXRED2	FAD dependent oxidoreductase domain containing 2	Up	FOXRED2_Up
ILMN_1786353	3.95e-10	1.22e-11	-7.70642	16.0246	-1.30539	CNGA1	cyclic nucleotide gated channel alpha 1	Down	CNGA1_Down
ILMN_1803036	4.2e-10	1.31e-11	7.69247	15.9584	1.05141	TARBP1	TAR (HIV-1) RNA binding protein 1	Up	TARBP1_Up
ILMN_1658926	4.21e-10	1.31e-11	7.69211	15.9567	1.05559	NOTCH3	notch 3	Up	NOTCH3_Up
ILMN_2377288	4.21e-10	1.31e-11	-7.69173	15.9549	-1.49995	CYP3A43	cytochrome P450 family 3 subfamily A member 43	Down	CYP3A43_Down
ILMN_2071598	4.26e-10	1.33e-11	-7.68899	15.9419	-1.78688	CFHR3	complement factor H related 3	Down	CFHR3_Down
ILMN_2185845	4.36e-10	1.37e-11	7.68288	15.9129	1.34082	BRSK1	BR serine/threonine kinase 1	Up	BRSK1_Up
ILMN_1681467	4.44e-10	1.39e-11	7.67901	15.8946	1.04628	RAB11FIP4	RAB11 family interacting protein 4	Up	RAB11FIP4_Up
ILMN_1761450	4.44e-10	1.4e-11	-7.6786	15.8926	-1.13312	DHRS4L2	dehydrogenase/reductase 4 like 2	Down	DHRS4L2_Down
ILMN_1700337	4.54e-10	1.43e-11	7.67317	15.8668	1.20534	TROAP	trophinin associated protein	Up	TROAP_Up
ILMN_1815719	4.92e-10	1.56e-11	-7.65563	15.7837	-1.24282	PLCG2	phospholipase C gamma 2	Down	PLCG2_Down
ILMN_1718977	5e-10	1.59e-11	-7.65176	15.7653	-1.59603	GADD45B	growth arrest and DNA damage inducible beta	Down	GADD45B_Down
ILMN_1688423	5.24e-10	1.67e-11	-7.64161	15.7172	-1.07828	FCER1A	Fc fragment of IgE receptor Ia	Down	FCER1A_Down
ILMN_1651228	5.48e-10	1.75e-11	-7.63147	15.6692	-1.13096	RPS28	ribosomal protein S28	Down	RPS28_Down
ILMN_1748093	5.61e-10	1.8e-11	7.62618	15.6441	1.7053	PAFAH1B3	platelet activating factor acetylhydrolase 1b catalytic subunit 3	Up	PAFAH1B3_Up
ILMN_1685551	6.09e-10	1.97e-11	7.60745	15.5554	1.05248	CHD4	chromodomain helicase DNA binding protein 4	Up	CHD4_Up
ILMN_1711078	6.96e-10	2.28e-11	7.57702	15.4114	1.00498	CDK11A	cyclin dependent kinase 11A	Up	CDK11A_Up
ILMN_1812700	7.01e-10	2.3e-11	-7.575	15.4019	-1.62939	LIPC	lipase C, hepatic type	Down	LIPC_Down
ILMN_1812726	7.16e-10	2.35e-11	-7.57035	15.3799	-1.19736	MORF4L1	mortality factor 4 like 1	Down	MORF4L1_Down
ILMN_1661637	7.22e-10	2.37e-11	-7.56844	15.3709	-1.53063	TRPM8	transient receptor potential cation channel subfamily M member 8	Down	TRPM8_Down
ILMN_1763196	7.32e-10	2.41e-11	-7.5648	15.3537	-2.08353	WDR72	WD repeat domain 72	Down	WDR72_Down
ILMN_1762464	7.4e-10	2.45e-11	-7.56196	15.3403	-2.09834	MBL2	mannose binding lectin 2	Down	MBL2_Down
ILMN_2372398	7.45e-10	2.47e-11	-7.56024	15.3321	-1.11156	ALDH5A1	aldehyde dehydrogenase 5 family member A1	Down	ALDH5A1_Down
ILMN_1703123	7.45e-10	2.47e-11	-7.56008	15.3314	-1.34008	CSRNP1	cysteine and serine rich nuclear protein 1	Down	CSRNP1_Down
ILMN_1742444	7.55e-10	2.51e-11	-7.55692	15.3164	-2.44141	UGT2B10	UDP glucuronosyltransferase family 2 member B10	Down	UGT2B10_Down
ILMN_1677505	7.64e-10	2.54e-11	-7.55426	15.3038	-1.83482	CCL21	C-C motif chemokine ligand 21	Down	CCL21_Down
ILMN_1691487	7.82e-10	2.6e-11	7.5492	15.28	1.07655	TRAF2	TNF receptor associated factor 2	Up	TRAF2_Up
ILMN_1791678	8.16e-10	2.72e-11	-7.53986	15.2358	-3.1561	TAT	tyrosine aminotransferase	Down	TAT_Down
ILMN_1688089	8.19e-10	2.73e-11	-7.53887	15.2311	-1.59978	PEBP1	phosphatidylethanolamine binding protein 1	Down	PEBP1_Down
ILMN_2218104	8.43e-10	2.83e-11	-7.53201	15.1988	-1.92996	PAH	phenylalanine hydroxylase	Down	PAH_Down
ILMN_1737157	8.75e-10	2.95e-11	7.52339	15.1581	1.27436	GRAMD1A	GRAM domain containing 1A	Up	GRAMD1A_Up
ILMN_1664010	8.86e-10	2.99e-11	-7.52012	15.1426	-1.21025	ELF1	E74 like ETS transcription factor 1	Down	ELF1_Down
ILMN_1699651	8.94e-10	3.02e-11	-7.51792	15.1322	-1.30663	IL6	interleukin 6	Down	IL6_Down
ILMN_1741204	9.83e-10	3.35e-11	-7.49662	15.0317	-1.5773	KLHDC2	kelch domain containing 2	Down	KLHDC2_Down
ILMN_1795007	9.94e-10	3.39e-11	-7.49385	15.0187	-1.46272	C2orf47	chromosome 2 open reading frame 47	Down	C2orf47_Down
ILMN_2388547	1.1e-09	3.77e-11	-7.47169	14.9142	-1.59073	EPSTI1	epithelial stromal interaction 1 (breast)	Down	EPSTI1_Down
ILMN_1758731	1.2e-09	4.15e-11	-7.45179	14.8205	-1.44518	CYP2J2	cytochrome P450 family 2 subfamily J member 2	Down	CYP2J2_Down
ILMN_1682783	1.21e-09	4.18e-11	7.45054	14.8146	1.09627	TUG1	taurine up-regulated 1 (non-protein coding)	Up	TUG1_Up
ILMN_1657529	1.22e-09	4.22e-11	-7.44828	14.8039	-1.0899	CYP2B6	cytochrome P450 family 2 subfamily B member 6	Down	CYP2B6_Down
ILMN_1767658	1.24e-09	4.31e-11	7.44417	14.7846	1.18841	RRS1	ribosome biogenesis regulator homolog	Up	RRS1_Up
ILMN_1801616	1.3e-09	4.54e-11	-7.43313	14.7326	-1.45095	EMP1	epithelial membrane protein 1	Down	EMP1_Down
ILMN_1741613	1.31e-09	4.59e-11	-7.43103	14.7227	-1.33058	SERINC1	serine incorporator 1	Down	SERINC1_Down
ILMN_1790909	1.31e-09	4.59e-11	-7.43092	14.7222	-1.60271	NFE2L2	nuclear factor, erythroid 2 like 2	Down	NFE2L2_Down
ILMN_1744534	1.32e-09	4.63e-11	-7.42888	14.7126	-1.66518	LYRM5	LYR motif containing 5	Down	LYRM5_Down
ILMN_1791095	1.38e-09	4.83e-11	-7.42003	14.671	-2.18222	SERPINA11	serpin family A member 11	Down	SERPINA11_Down
ILMN_1769155	1.39e-09	4.87e-11	-7.4184	14.6633	-2.34457	CYP2C8	cytochrome P450 family 2 subfamily C member 8	Down	CYP2C8_Down
ILMN_1663092	1.44e-09	5.09e-11	-7.40926	14.6203	-1.37489	CITED2	Cbp/p300 interacting transactivator with Glu/Asp rich carboxy-terminal domain 2	Down	CITED2_Down
ILMN_1738955	1.56e-09	5.52e-11	-7.39209	14.5396	-1.06342	ANAPC16	anaphase promoting complex subunit 16	Down	ANAPC16_Down
ILMN_1675656	1.62e-09	5.75e-11	-7.38388	14.501	-1.08392	PPFIBP2	PPFIA binding protein 2	Down	PPFIBP2_Down
ILMN_1761999	1.63e-09	5.81e-11	-7.38153	14.49	-1.04923	C1orf168	chromosome 1 open reading frame 168	Down	C1orf168_Down
ILMN_2115125	1.67e-09	5.97e-11	-7.37584	14.4632	-1.61344	CTGF	connective tissue growth factor	Down	CTGF_Down
ILMN_1669094	1.71e-09	6.13e-11	7.37047	14.438	1.09049	ZNF672	zinc finger protein 672	Up	ZNF672_Up
ILMN_1800750	1.71e-09	6.13e-11	7.37044	14.4379	1.08552	ZNF692	zinc finger protein 692	Up	ZNF692_Up
ILMN_2054607	1.77e-09	6.36e-11	-7.36264	14.4013	-1.58142	CYP4V2	cytochrome P450 family 4 subfamily V member 2	Down	CYP4V2_Down
ILMN_1761425	1.78e-09	6.4e-11	7.36142	14.3955	1.00591	OLFML2A	olfactomedin like 2A	Up	OLFML2A_Up
ILMN_1800008	1.79e-09	6.46e-11	-7.35944	14.3862	-1.25532	ACAT1	acetyl-CoA acetyltransferase 1	Down	ACAT1_Down
ILMN_1677466	1.91e-09	6.96e-11	-7.34385	14.3131	-1.04676	DUSP6	dual specificity phosphatase 6	Down	DUSP6_Down
ILMN_1797974	1.95e-09	7.09e-11	-7.33996	14.2948	-1.53324	AIG1	androgen induced 1	Down	AIG1_Down
ILMN_1730625	1.97e-09	7.18e-11	-7.33735	14.2826	-1.92025	AHSG	alpha 2-HS glycoprotein	Down	AHSG_Down
ILMN_1714384	2.05e-09	7.48e-11	-7.32852	14.2412	-1.059	PCCA	propionyl-CoA carboxylase alpha subunit	Down	PCCA_Down
ILMN_2109197	2.19e-09	8.07e-11	-7.31262	14.1667	-1.01782	EPB41L3	erythrocyte membrane protein band 4.1 like 3	Down	EPB41L3_Down
ILMN_2124361	2.24e-09	8.23e-11	-7.30852	14.1474	-1.79857	LEAP2	liver enriched antimicrobial peptide 2	Down	LEAP2_Down
ILMN_1807101	2.26e-09	8.34e-11	-7.30579	14.1347	-1.05834	F11	coagulation factor XI	Down	F11_Down
ILMN_1802905	2.26e-09	8.36e-11	7.30539	14.1327	1.19448	PIAS4	protein inhibitor of activated STAT 4	Up	PIAS4_Up
ILMN_2195236	2.42e-09	8.97e-11	-7.29049	14.063	-1.52572	PGRMC2	progesterone receptor membrane component 2	Down	PGRMC2_Down
ILMN_1685763	2.55e-09	9.51e-11	7.27836	14.0062	1.00965	WDR45B	WD repeat domain 45B	Up	WDR45B_Up
ILMN_1728799	2.57e-09	9.63e-11	-7.27567	13.9936	-1.90632	FBP1	fructose-bisphosphatase 1	Down	FBP1_Down
ILMN_1697559	2.63e-09	9.86e-11	7.27062	13.97	1.41088	G6PD	glucose-6-phosphate dehydrogenase	Up	G6PD_Up
ILMN_1788239	2.65e-09	9.95e-11	-7.26879	13.9614	-1.48463	AMDHD1	amidohydrolase domain containing 1	Down	AMDHD1_Down
ILMN_2068747	2.69e-09	1.01e-10	-7.26593	13.9481	-2.1387	OAT	ornithine aminotransferase	Down	OAT_Down
ILMN_1712632	2.72e-09	1.02e-10	-7.26282	13.9335	-1.24503	XDH	xanthine dehydrogenase	Down	XDH_Down
ILMN_1721580	2.87e-09	1.08e-10	-7.25064	13.8765	-1.53243	TBX15	T-box 15	Down	TBX15_Down
ILMN_1705151	2.87e-09	1.09e-10	7.25052	13.876	1.15833	SF3A3	splicing factor 3a subunit 3	Up	SF3A3_Up
ILMN_1725773	3.12e-09	1.19e-10	-7.2317	13.7881	-1.6072	DNAJC12	DnaJ heat shock protein family (Hsp40) member C12	Down	DNAJC12_Down
ILMN_1768181	3.17e-09	1.21e-10	7.22801	13.7708	1.13723	TOR3A	torsin family 3 member A	Up	TOR3A_Up
ILMN_1811754	3.25e-09	1.24e-10	-7.22222	13.7438	-1.53398	NDUFB10	NADH:ubiquinone oxidoreductase subunit B10	Down	NDUFB10_Down
ILMN_2384241	3.35e-09	1.29e-10	-7.21469	13.7086	-1.06061	TGFBR2	transforming growth factor beta receptor 2	Down	TGFBR2_Down
ILMN_1782538	3.36e-09	1.29e-10	-7.2139	13.7049	-1.64172	VIM	vimentin	Down	VIM_Down
ILMN_1729439	3.44e-09	1.33e-10	-7.20856	13.68	-1.27381	CYP4F2	cytochrome P450 family 4 subfamily F member 2	Down	CYP4F2_Down
ILMN_1759023	3.46e-09	1.34e-10	7.20647	13.6702	1.11366	WFS1	wolframin ER transmembrane glycoprotein	Up	WFS1_Up
ILMN_1790637	3.6e-09	1.39e-10	7.19789	13.6302	1.01933	C11orf80	chromosome 11 open reading frame 80	Up	C11orf80_Up
ILMN_1700183	3.62e-09	1.4e-10	-7.19642	13.6233	-1.29066	APLNR	apelin receptor	Down	APLNR_Down
ILMN_1742069	3.67e-09	1.42e-10	7.19327	13.6087	1.26832	ZSWIM5	zinc finger SWIM-type containing 5	Up	ZSWIM5_Up
ILMN_1794875	3.92e-09	1.53e-10	-7.17767	13.5359	-1.19977	GPAT3	glycerol-3-phosphate acyltransferase 3	Down	GPAT3_Down
ILMN_1717261	4.05e-09	1.58e-10	-7.17084	13.5041	-1.4556	HLA-DRB3	major histocompatibility complex, class II, DR beta 3	Down	HLA-DRB3_Down
ILMN_2342579	4.06e-09	1.59e-10	-7.16999	13.5001	-1.40306	IL7R	interleukin 7 receptor	Down	IL7R_Down
ILMN_1651336	4.1e-09	1.61e-10	-7.16699	13.4861	-1.00232	MLYCD	malonyl-CoA decarboxylase	Down	MLYCD_Down
ILMN_1808713	4.65e-09	1.84e-10	-7.13923	13.3569	-1.73413	HSD17B2	hydroxysteroid 17-beta dehydrogenase 2	Down	HSD17B2_Down
ILMN_1690979	4.73e-09	1.88e-10	-7.13532	13.3387	-1.47182	SLC17A3	solute carrier family 17 member 3	Down	SLC17A3_Down
ILMN_1769158	4.85e-09	1.93e-10	-7.12943	13.3112	-1.14847	ISOC2	isochorismatase domain containing 2	Down	ISOC2_Down
ILMN_1665428	5.11e-09	2.04e-10	7.11714	13.2541	1.03461	GSDMD	gasdermin D	Up	GSDMD_Up
ILMN_1760062	5.11e-09	2.04e-10	-7.11711	13.254	-1.48662	IFI44	interferon induced protein 44	Down	IFI44_Down
ILMN_1761577	5.25e-09	2.11e-10	-7.11072	13.2243	-1.16966	STEAP3	STEAP3 metalloreductase	Down	STEAP3_Down
ILMN_2159694	5.27e-09	2.12e-10	-7.10975	13.2198	-1.49243	HLA-DRB4	major histocompatibility complex, class II, DR beta 4	Down	HLA-DRB4_Down
ILMN_1776158	5.37e-09	2.16e-10	-7.10539	13.1995	-1.08607	CDV3	CDV3 homolog	Down	CDV3_Down
ILMN_2359907	5.37e-09	2.16e-10	-7.1053	13.1991	-1.11826	CD68	CD68 molecule	Down	CD68_Down
ILMN_1685483	5.44e-09	2.19e-10	-7.10231	13.1852	-2.02886	FETUB	fetuin B	Down	FETUB_Down
ILMN_1778561	5.53e-09	2.23e-10	-7.09874	13.1686	-1.15716	WEE1	WEE1 G2 checkpoint kinase	Down	WEE1_Down
ILMN_1782429	5.85e-09	2.37e-10	-7.08586	13.1087	-1.11787	TMEM56	transmembrane protein 56	Down	TMEM56_Down
ILMN_1755138	5.89e-09	2.39e-10	7.08413	13.1007	1.16749	NEK8	NIMA related kinase 8	Up	NEK8_Up
ILMN_1673649	6e-09	2.44e-10	7.0801	13.082	1.05833	HYOU1	hypoxia up-regulated 1	Up	HYOU1_Up
ILMN_1692121	6.15e-09	2.5e-10	-7.07483	13.0575	-1.37806	USO1	USO1 vesicle transport factor	Down	USO1_Down
ILMN_1787345	6.49e-09	2.66e-10	7.06141	12.9953	1.11792	FKBP11	FK506 binding protein 11	Up	FKBP11_Up
ILMN_2282641	6.92e-09	2.85e-10	-7.04657	12.9264	-1.03791	TBXAS1	thromboxane A synthase 1	Down	TBXAS1_Down
ILMN_1770800	6.96e-09	2.87e-10	-7.04511	12.9197	-1.35799	PODN	podocan	Down	PODN_Down
ILMN_2085012	7.29e-09	3.02e-10	-7.03473	12.8716	-1.02959	TMEM176B	transmembrane protein 176B	Down	TMEM176B_Down
ILMN_1751444	7.36e-09	3.05e-10	7.03257	12.8616	1.31421	NCAPG	non-SMC condensin I complex subunit G	Up	NCAPG_Up
ILMN_1727402	7.79e-09	3.24e-10	-7.01958	12.8014	-1.16215	HCLS1	hematopoietic cell-specific Lyn substrate 1	Down	HCLS1_Down
ILMN_1796409	8.18e-09	3.41e-10	-7.00857	12.7505	-1.51494	C1QB	complement C1q B chain	Down	C1QB_Down
ILMN_2222234	8.36e-09	3.5e-10	-7.00335	12.7263	-1.21792	PRDX4	peroxiredoxin 4	Down	PRDX4_Down
ILMN_2324421	8.73e-09	3.66e-10	6.99362	12.6813	1.39654	TXNRD1	thioredoxin reductase 1	Up	TXNRD1_Up
ILMN_2135798	8.86e-09	3.72e-10	6.99043	12.6665	1.0012	NR2C2AP	nuclear receptor 2C2 associated protein	Up	NR2C2AP_Up
ILMN_2090558	9e-09	3.8e-10	-6.98584	12.6453	-1.20173	MMADHC	methylmalonic aciduria and homocystinuria, cblD type	Down	MMADHC_Down
ILMN_2407346	9.32e-09	3.95e-10	-6.9779	12.6086	-1.08275	LDHD	lactate dehydrogenase D	Down	LDHD_Down
ILMN_2097793	9.39e-09	3.98e-10	-6.97606	12.6001	-1.05279	ZBTB4	zinc finger and BTB domain containing 4	Down	ZBTB4_Down
ILMN_1779014	1.02e-08	4.34e-10	-6.95778	12.5157	-1.1734	TSPYL1	TSPY like 1	Down	TSPYL1_Down
ILMN_1784287	1.02e-08	4.36e-10	-6.95674	12.5109	-1.22527	TGFBR3	transforming growth factor beta receptor 3	Down	TGFBR3_Down
ILMN_1672148	1.03e-08	4.41e-10	6.95433	12.4998	3.19188	AKR1B10	aldo-keto reductase family 1 member B10	Up	AKR1B10_Up
ILMN_2394777	1.04e-08	4.43e-10	6.95312	12.4942	1.0855	DTNA	dystrobrevin alpha	Up	DTNA_Up
ILMN_1797875	1.05e-08	4.51e-10	-6.94944	12.4772	-1.37843	ALOX5AP	arachidonate 5-lipoxygenase activating protein	Down	ALOX5AP_Down
ILMN_1780831	1.07e-08	4.6e-10	-6.94509	12.4571	-1.59932	SLC6A12	solute carrier family 6 member 12	Down	SLC6A12_Down
ILMN_1800659	1.11e-08	4.78e-10	-6.93715	12.4205	-1.02477	PGM1	phosphoglucomutase 1	Down	PGM1_Down
ILMN_2184049	1.13e-08	4.86e-10	-6.93353	12.4038	-1.40278	COX7B	cytochrome c oxidase subunit 7B	Down	COX7B_Down
ILMN_1691290	1.14e-08	4.93e-10	6.93052	12.3899	1.58738	CELSR3	cadherin EGF LAG seven-pass G-type receptor 3	Up	CELSR3_Up
ILMN_1809590	1.15e-08	4.99e-10	6.92817	12.379	1.12773	GINS2	GINS complex subunit 2	Up	GINS2_Up
ILMN_1670134	1.21e-08	5.25e-10	6.91703	12.3277	1.877	FADS1	fatty acid desaturase 1	Up	FADS1_Up
ILMN_1685567	1.21e-08	5.25e-10	-6.91701	12.3276	-1.07979	TGDS	TDP-glucose 4,6-dehydratase	Down	TGDS_Down
ILMN_1654065	1.24e-08	5.39e-10	-6.91153	12.3024	-1.42012	ATOH8	atonal bHLH transcription factor 8	Down	ATOH8_Down
ILMN_1774077	1.34e-08	5.89e-10	6.89279	12.2161	1.21754	GBP2	guanylate binding protein 2	Up	GBP2_Up
ILMN_2254994	1.35e-08	5.94e-10	-6.89102	12.2079	-1.07469	NNT	nicotinamide nucleotide transhydrogenase	Down	NNT_Down
ILMN_2043452	1.35e-08	5.95e-10	6.89066	12.2063	1.01568	FANCE	Fanconi anemia complementation group E	Up	FANCE_Up
ILMN_1703648	1.37e-08	6.03e-10	-6.88773	12.1928	-1.45497	TMEM82	transmembrane protein 82	Down	TMEM82_Down
ILMN_2189675	1.37e-08	6.06e-10	6.88663	12.1877	1.5669	HRCT1	histidine rich carboxyl terminus 1	Up	HRCT1_Up
ILMN_1701269	1.39e-08	6.14e-10	-6.88394	12.1753	-1.65027	ATP5C1	ATP synthase, H+ transporting, mitochondrial F1 complex, gamma polypeptide 1	Down	ATP5C1_Down
ILMN_1755115	1.53e-08	6.8e-10	-6.86217	12.0752	-1.01093	RPL23	ribosomal protein L23	Down	RPL23_Down
ILMN_1706579	1.54e-08	6.89e-10	-6.85934	12.0622	-2.12881	SHBG	sex hormone binding globulin	Down	SHBG_Down
ILMN_1804822	1.54e-08	6.89e-10	6.85934	12.0622	1.46472	SRXN1	sulfiredoxin 1	Up	SRXN1_Up
ILMN_1771120	1.56e-08	6.95e-10	6.85746	12.0536	1.3847	TMEM45B	transmembrane protein 45B	Up	TMEM45B_Up
ILMN_1715715	1.61e-08	7.22e-10	6.84916	12.0154	1.01747	CEBPA	CCAAT/enhancer binding protein alpha	Up	CEBPA_Up
ILMN_2179018	1.62e-08	7.28e-10	-6.84743	12.0075	-1.82614	NDUFAB1	NADH:ubiquinone oxidoreductase subunit AB1	Down	NDUFAB1_Down
ILMN_1664449	1.63e-08	7.32e-10	-6.84625	12.0021	-1.32254	ALG5	ALG5, dolichyl-phosphate beta-glucosyltransferase	Down	ALG5_Down
ILMN_1758128	1.66e-08	7.49e-10	-6.84152	11.9803	-1.24583	CYGB	cytoglobin	Down	CYGB_Down
ILMN_1789400	1.67e-08	7.57e-10	6.83913	11.9694	1.25653	FOXD2	forkhead box D2	Up	FOXD2_Up
ILMN_1793672	1.84e-08	8.4e-10	6.81696	11.8676	1.02822	SIX5	SIX homeobox 5	Up	SIX5_Up
ILMN_1686623	1.86e-08	8.47e-10	-6.81511	11.8592	-1.09479	CSF1R	colony stimulating factor 1 receptor	Down	CSF1R_Down
ILMN_1699772	1.99e-08	9.15e-10	6.79859	11.7834	1.44715	RRAGD	Ras related GTP binding D	Up	RRAGD_Up
ILMN_1670817	2.13e-08	9.82e-10	-6.78356	11.7146	-1.18348	GRPEL1	GrpE like 1, mitochondrial	Down	GRPEL1_Down
ILMN_1790810	2.22e-08	1.03e-09	-6.7733	11.6676	-1.18384	HCN4	hyperpolarization activated cyclic nucleotide gated potassium channel 4	Down	HCN4_Down
ILMN_1771652	2.4e-08	1.12e-09	6.75508	11.5843	1.73895	BAIAP2L2	BAI1 associated protein 2 like 2	Up	BAIAP2L2_Up
ILMN_1720838	2.44e-08	1.14e-09	-6.75142	11.5676	-1.27853	DECR1	2,4-dienoyl-CoA reductase 1, mitochondrial	Down	DECR1_Down
ILMN_1662470	2.66e-08	1.25e-09	6.73125	11.4754	1.18691	C10orf35	chromosome 10 open reading frame 35	Up	C10orf35_Up
ILMN_1683121	2.69e-08	1.27e-09	-6.72842	11.4625	-1.63448	CYP2C18	cytochrome P450 family 2 subfamily C member 18	Down	CYP2C18_Down
ILMN_1664028	2.7e-08	1.28e-09	6.72728	11.4573	1.03812	CENPB	centromere protein B	Up	CENPB_Up
ILMN_2151739	2.73e-08	1.29e-09	-6.72464	11.4452	-1.2609	CAT	catalase	Down	CAT_Down
ILMN_1810000	2.78e-08	1.32e-09	-6.72054	11.4265	-2.24325	RDH16	retinol dehydrogenase 16 (all-trans)	Down	RDH16_Down
ILMN_2089484	3.24e-08	1.55e-09	-6.68536	11.2661	-1.34235	CYP4F3	cytochrome P450 family 4 subfamily F member 3	Down	CYP4F3_Down
ILMN_1655915	3.32e-08	1.59e-09	6.67959	11.2398	1.59649	MMP11	matrix metallopeptidase 11	Up	MMP11_Up
ILMN_1731948	3.42e-08	1.65e-09	-6.67256	11.2078	-2.46539	PCK1	phosphoenolpyruvate carboxykinase 1	Down	PCK1_Down
ILMN_1780141	3.42e-08	1.65e-09	-6.67233	11.2068	-1.47931	SARAF	store-operated calcium entry associated regulatory factor	Down	SARAF_Down
ILMN_1687107	3.45e-08	1.66e-09	6.67031	11.1976	1.03216	RFWD3	ring finger and WD repeat domain 3	Up	RFWD3_Up
ILMN_1661337	3.5e-08	1.69e-09	6.66641	11.1798	1.0666	SRM	spermidine synthase	Up	SRM_Up
ILMN_1738866	3.65e-08	1.77e-09	-6.65719	11.1379	-1.26202	DEXI	Dexi homolog	Down	DEXI_Down
ILMN_1756311	3.68e-08	1.79e-09	-6.65496	11.1277	-1.00804	UFSP2	UFM1 specific peptidase 2	Down	UFSP2_Down
ILMN_1733627	3.81e-08	1.86e-09	6.64675	11.0904	1.11679	NEDD4L	neural precursor cell expressed, developmentally down-regulated 4-like, E3 ubiquitin protein ligase	Up	NEDD4L_Up
ILMN_1738062	3.95e-08	1.93e-09	-6.63808	11.051	-1.28842	CYP2D7	cytochrome P450 family 2 subfamily D member 7 (gene/pseudogene)	Down	CYP2D7_Down
ILMN_2041293	3.95e-08	1.94e-09	6.63765	11.049	1.66353	SQLE	squalene epoxidase	Up	SQLE_Up
ILMN_1676629	4.3e-08	2.12e-09	-6.6179	10.9593	-1.34692	INSIG2	insulin induced gene 2	Down	INSIG2_Down
ILMN_1785765	4.33e-08	2.14e-09	-6.61617	10.9515	-1.63252	TM9SF2	transmembrane 9 superfamily member 2	Down	TM9SF2_Down
ILMN_2058512	4.39e-08	2.17e-09	-6.61276	10.936	-1.16757	PSMA2	proteasome subunit alpha 2	Down	PSMA2_Down
ILMN_2105983	4.87e-08	2.44e-09	-6.58801	10.8238	-1.08563	XRCC5	X-ray repair cross complementing 5	Down	XRCC5_Down
ILMN_1731546	4.97e-08	2.5e-09	-6.58269	10.7997	-1.57343	RPL26	ribosomal protein L26	Down	RPL26_Down
ILMN_1653133	4.98e-08	2.5e-09	-6.58248	10.7987	-1.37801	SH3D19	SH3 domain containing 19	Down	SH3D19_Down
ILMN_1815184	5.01e-08	2.52e-09	6.58091	10.7916	1.52866	ASPM	abnormal spindle microtubule assembly	Up	ASPM_Up
ILMN_2145396	5.09e-08	2.56e-09	-6.57717	10.7747	-1.77725	AKR7A3	aldo-keto reductase family 7 member A3	Down	AKR7A3_Down
ILMN_1892403	5.11e-08	2.57e-09	-6.57613	10.77	-1.42845	SNORD13	small nucleolar RNA, C/D box 13	Down	SNORD13_Down
ILMN_1719392	5.13e-08	2.59e-09	-6.57489	10.7644	-1.50024	FH	fumarate hydratase	Down	FH_Down
ILMN_1887357	5.2e-08	2.62e-09	6.57203	10.7514	1.17302	CHRM3	cholinergic receptor muscarinic 3	Up	CHRM3_Up
ILMN_1664577	5.56e-08	2.82e-09	-6.55628	10.6801	-1.17143	DLD	dihydrolipoamide dehydrogenase	Down	DLD_Down
ILMN_1760174	5.57e-08	2.82e-09	-6.55597	10.6787	-1.01671	MCCC1	methylcrotonoyl-CoA carboxylase 1	Down	MCCC1_Down
ILMN_1814213	5.7e-08	2.9e-09	-6.55043	10.6537	-1.16969	PQLC3	PQ loop repeat containing 3	Down	PQLC3_Down
ILMN_1720889	5.79e-08	2.94e-09	-6.54699	10.6381	-1.40089	MSMO1	methylsterol monooxygenase 1	Down	MSMO1_Down
ILMN_2112638	6.38e-08	3.27e-09	-6.52428	10.5355	-1.51223	SVEP1	sushi, von Willebrand factor type A, EGF and pentraxin domain containing 1	Down	SVEP1_Down
ILMN_1710606	6.68e-08	3.44e-09	-6.51307	10.4849	-1.6032	C8A	complement component 8 alpha subunit	Down	C8A_Down
ILMN_1699631	6.71e-08	3.47e-09	6.51162	10.4784	1.09003	GATS	GATS, stromal antigen 3 opposite strand	Up	GATS_Up
ILMN_1692785	6.86e-08	3.55e-09	6.50613	10.4536	1.00732	KLHL21	kelch like family member 21	Up	KLHL21_Up
ILMN_1722662	6.89e-08	3.57e-09	-6.50498	10.4485	-1.05103	RAD23B	RAD23 homolog B, nucleotide excision repair protein	Down	RAD23B_Down
ILMN_1762260	7.01e-08	3.64e-09	-6.50103	10.4307	-1.37069	C3	complement component 3	Down	C3_Down
ILMN_1752281	7.1e-08	3.69e-09	6.49787	10.4164	1.07601	DNAJC13	DnaJ heat shock protein family (Hsp40) member C13	Up	DNAJC13_Up
ILMN_1679483	7.21e-08	3.75e-09	-6.49442	10.4009	-1.03636	INTS10	integrator complex subunit 10	Down	INTS10_Down
ILMN_1728426	8.14e-08	4.28e-09	6.46589	10.2724	1.07285	INPPL1	inositol polyphosphate phosphatase like 1	Up	INPPL1_Up
ILMN_1708183	8.16e-08	4.29e-09	-6.46517	10.2691	-1.88553	PZP	PZP, alpha-2-macroglobulin like	Down	PZP_Down
ILMN_1794829	8.21e-08	4.32e-09	6.4638	10.263	1.44864	MRAP2	melanocortin 2 receptor accessory protein 2	Up	MRAP2_Up
ILMN_1787514	8.34e-08	4.4e-09	6.45994	10.2456	1.55751	CAPN12	calpain 12	Up	CAPN12_Up
ILMN_1668012	8.55e-08	4.53e-09	-6.45351	10.2167	-1.55598	SLC25A13	solute carrier family 25 member 13	Down	SLC25A13_Down
ILMN_1757134	8.6e-08	4.56e-09	6.4519	10.2095	1.04514	MPV17L2	MPV17 mitochondrial inner membrane protein like 2	Up	MPV17L2_Up
ILMN_2234187	8.63e-08	4.58e-09	-6.45085	10.2047	-1.35798	CDO1	cysteine dioxygenase type 1	Down	CDO1_Down
ILMN_1766079	8.69e-08	4.62e-09	6.44916	10.1971	1.09738	SULT1C2	sulfotransferase family 1C member 2	Up	SULT1C2_Up
ILMN_1729801	8.8e-08	4.69e-09	-6.44599	10.1829	-1.84668	S100A8	S100 calcium binding protein A8	Down	S100A8_Down
ILMN_1707077	8.83e-08	4.71e-09	6.44499	10.1784	1.30314	SORT1	sortilin 1	Up	SORT1_Up
ILMN_1721703	8.83e-08	4.71e-09	-6.44476	10.1774	-1.34926	PNN	pinin, desmosome associated protein	Down	PNN_Down
ILMN_2123743	8.83e-08	4.72e-09	-6.44472	10.1772	-1.46109	FCER1G	Fc fragment of IgE receptor Ig	Down	FCER1G_Down
ILMN_2276952	8.85e-08	4.73e-09	-6.44401	10.174	-1.05843	TSC22D3	TSC22 domain family member 3	Down	TSC22D3_Down
ILMN_1702973	8.89e-08	4.75e-09	-6.44294	10.1692	-1.01163	EVA1A	eva-1 homolog A, regulator of programmed cell death	Down	EVA1A_Down
ILMN_1778977	9.08e-08	4.86e-09	-6.43823	10.148	-1.2601	TYROBP	TYRO protein tyrosine kinase binding protein	Down	TYROBP_Down
ILMN_1793628	9.8e-08	5.27e-09	-6.42028	10.0674	-1.26572	SERPINA10	serpin family A member 10	Down	SERPINA10_Down
ILMN_1708743	1.02e-07	5.51e-09	6.41076	10.0247	1.21754	NT5DC2	5'-nucleotidase domain containing 2	Up	NT5DC2_Up
ILMN_1700546	1.03e-07	5.59e-09	-6.40757	10.0104	-1.07989	ELOVL6	ELOVL fatty acid elongase 6	Down	ELOVL6_Down
ILMN_1727770	1.05e-07	5.71e-09	-6.40316	9.99064	-1.47268	RGN	regucalcin	Down	RGN_Down
ILMN_1789096	1.08e-07	5.86e-09	-6.39721	9.96399	-2.04807	SLC51A	solute carrier family 51 alpha subunit	Down	SLC51A_Down
ILMN_1701308	1.08e-07	5.88e-09	6.39664	9.96144	1.86927	COL1A1	collagen type I alpha 1 chain	Up	COL1A1_Up
ILMN_1794392	1.11e-07	6.07e-09	-6.38954	9.92962	-1.03364	DDX3X	DEAD-box helicase 3, X-linked	Down	DDX3X_Down
ILMN_1668593	1.11e-07	6.09e-09	-6.38895	9.92699	-1.57051	HPX	hemopexin	Down	HPX_Down
ILMN_1768510	1.12e-07	6.11e-09	-6.38829	9.92405	-1.21381	MAN2B2	mannosidase alpha class 2B member 2	Down	MAN2B2_Down
ILMN_1668063	1.13e-07	6.16e-09	-6.38625	9.9149	-1.04819	FCN1	ficolin 1	Down	FCN1_Down
ILMN_2051519	1.13e-07	6.18e-09	-6.38573	9.91255	-1.40493	RPL37A	ribosomal protein L37a	Down	RPL37A_Down
ILMN_1678671	1.13e-07	6.22e-09	-6.38445	9.90685	-1.02524	KLHL24	kelch like family member 24	Down	KLHL24_Down
ILMN_1665510	1.14e-07	6.27e-09	-6.3827	9.89901	-1.44321	ERRFI1	ERBB receptor feedback inhibitor 1	Down	ERRFI1_Down
ILMN_1806607	1.18e-07	6.49e-09	6.37509	9.86492	1.20217	SFN	stratifin	Up	SFN_Up
ILMN_1809291	1.18e-07	6.51e-09	-6.37418	9.86089	-1.21375	TSPAN7	tetraspanin 7	Down	TSPAN7_Down
ILMN_1792679	1.22e-07	6.79e-09	6.3651	9.82024	1.06854	ITGA5	integrin subunit alpha 5	Up	ITGA5_Up
ILMN_1794951	1.23e-07	6.84e-09	-6.36344	9.81282	-1.53758	SLC39A5	solute carrier family 39 member 5	Down	SLC39A5_Down
ILMN_1656145	1.28e-07	7.11e-09	-6.35512	9.77566	-1.13477	GOT1	glutamic-oxaloacetic transaminase 1	Down	GOT1_Down
ILMN_2347789	1.35e-07	7.59e-09	-6.3407	9.71122	-1.268	C4BPB	complement component 4 binding protein beta	Down	C4BPB_Down
ILMN_1812281	1.38e-07	7.76e-09	-6.33578	9.68928	-1.92714	ARG1	arginase 1	Down	ARG1_Down
ILMN_1679324	1.56e-07	8.84e-09	-6.30735	9.56249	-1.26718	EIF1B	eukaryotic translation initiation factor 1B	Down	EIF1B_Down
ILMN_1731293	1.56e-07	8.87e-09	-6.30666	9.5594	-1.31797	C8B	complement component 8, beta polypeptide	Down	C8B_Down
ILMN_1807633	1.59e-07	9.04e-09	-6.30234	9.54019	-1.43543	RIDA	reactive intermediate imine deaminase A homolog	Down	RIDA_Down
ILMN_1777740	1.75e-07	1e-08	6.27912	9.43684	1.07724	THEM6	thioesterase superfamily member 6	Up	THEM6_Up
ILMN_1755077	1.8e-07	1.04e-08	-6.27248	9.40731	-1.35745	HEBP2	heme binding protein 2	Down	HEBP2_Down
ILMN_1812433	1.82e-07	1.05e-08	-6.26907	9.39212	-1.90792	HP	haptoglobin	Down	HP_Down
ILMN_1677385	1.85e-07	1.07e-08	-6.26502	9.37413	-1.06624	SMIM19	small integral membrane protein 19	Down	SMIM19_Down
ILMN_1685403	1.88e-07	1.1e-08	-6.26006	9.35211	-1.51888	MMP7	matrix metallopeptidase 7	Down	MMP7_Down
ILMN_1849186	1.9e-07	1.11e-08	6.25778	9.34196	1.01693	ZNF704	zinc finger protein 704	Up	ZNF704_Up
ILMN_1750974	1.93e-07	1.13e-08	-6.25398	9.32511	-1.83931	S100A9	S100 calcium binding protein A9	Down	S100A9_Down
ILMN_1698551	2.03e-07	1.19e-08	-6.2423	9.27325	-1.12169	RCN1	reticulocalbin 1	Down	RCN1_Down
ILMN_1728975	2.09e-07	1.23e-08	-6.2344	9.23823	-1.13775	SCO1	SCO1 cytochrome c oxidase assembly protein	Down	SCO1_Down
ILMN_1815626	2.1e-07	1.23e-08	6.23379	9.23553	1.08969	DHCR7	7-dehydrocholesterol reductase	Up	DHCR7_Up
ILMN_2053103	2.13e-07	1.25e-08	-6.23041	9.22051	-1.1129	SLC40A1	solute carrier family 40 member 1	Down	SLC40A1_Down
ILMN_1698019	2.14e-07	1.26e-08	-6.22902	9.21437	-1.01139	LGMN	legumain	Down	LGMN_Down
ILMN_1792748	2.2e-07	1.3e-08	-6.22173	9.18208	-2.44753	CPS1	carbamoyl-phosphate synthase 1	Down	CPS1_Down
ILMN_1711919	2.21e-07	1.31e-08	-6.22089	9.17836	-1.01048	SCYL2	SCY1 like pseudokinase 2	Down	SCYL2_Down
ILMN_2105573	2.28e-07	1.36e-08	-6.21247	9.14107	-1.18177	CCL3L3	C-C motif chemokine ligand 3 like 3	Down	CCL3L3_Down
ILMN_1685441	2.35e-07	1.4e-08	6.20528	9.10925	1.01359	ASAP3	ArfGAP with SH3 domain, ankyrin repeat and PH domain 3	Up	ASAP3_Up
ILMN_1656501	2.38e-07	1.42e-08	-6.2027	9.09782	-1.3311	DUSP5	dual specificity phosphatase 5	Down	DUSP5_Down
ILMN_1713756	2.45e-07	1.47e-08	-6.19575	9.06708	-1.04477	GLUD1	glutamate dehydrogenase 1	Down	GLUD1_Down
ILMN_1688242	2.48e-07	1.49e-08	-6.19295	9.05469	-1.95494	C6	complement component 6	Down	C6_Down
ILMN_1756573	2.52e-07	1.51e-08	6.18869	9.03587	1.0374	NDUFA4L2	NDUFA4, mitochondrial complex associated like 2	Up	NDUFA4L2_Up
ILMN_1714592	2.54e-07	1.52e-08	-6.18725	9.0295	-1.06809	CDA	cytidine deaminase	Down	CDA_Down
ILMN_1738712	2.97e-07	1.81e-08	-6.14889	8.86016	-1.10459	GPR180	G protein-coupled receptor 180	Down	GPR180_Down
ILMN_1778357	3.21e-07	1.97e-08	-6.13037	8.77855	-1.32696	DNMT3L	DNA methyltransferase 3 like	Down	DNMT3L_Down
ILMN_1674386	3.29e-07	2.03e-08	6.12395	8.75028	1.70403	PITX1	paired like homeodomain 1	Up	PITX1_Up
ILMN_1704876	3.32e-07	2.05e-08	-6.12164	8.74012	-1.22977	USP38	ubiquitin specific peptidase 38	Down	USP38_Down
ILMN_1786278	3.33e-07	2.06e-08	-6.12086	8.73671	-1.06353	FAM149A	family with sequence similarity 149 member A	Down	FAM149A_Down
ILMN_1661650	3.38e-07	2.1e-08	-6.11677	8.7187	-1.03879	PPP4R3B	protein phosphatase 4 regulatory subunit 3B	Down	PPP4R3B_Down
ILMN_1662587	3.49e-07	2.17e-08	-6.10884	8.68381	-1.22371	PNPLA7	patatin like phospholipase domain containing 7	Down	PNPLA7_Down
ILMN_1773586	3.62e-07	2.26e-08	-6.09993	8.64468	-1.60329	SLC17A2	solute carrier family 17 member 2	Down	SLC17A2_Down
ILMN_2407082	3.75e-07	2.35e-08	-6.09175	8.60873	-1.55544	SEP15	15 kDa selenoprotein	Down	SEP15_Down
ILMN_2138019	3.91e-07	2.45e-08	-6.08181	8.56513	-1.89666	HEPACAM	hepatic and glial cell adhesion molecule	Down	HEPACAM_Down
ILMN_1716276	4e-07	2.52e-08	-6.07605	8.53984	-1.01826	CCL4L1	C-C motif chemokine ligand 4 like 1	Down	CCL4L1_Down
ILMN_1691884	4e-07	2.52e-08	6.07591	8.53926	1.32975	STC2	stanniocalcin 2	Up	STC2_Up
ILMN_1679754	4.08e-07	2.57e-08	-6.07097	8.51759	-1.09257	ADRA1B	adrenoceptor alpha 1B	Down	ADRA1B_Down
ILMN_1653292	4.15e-07	2.62e-08	6.06689	8.49967	1.0213	PFKFB4	6-phosphofructo-2-kinase/fructose-2,6-biphosphatase 4	Up	PFKFB4_Up
ILMN_2124769	4.31e-07	2.73e-08	-6.05806	8.46102	-1.37294	YBX1	Y-box binding protein 1	Down	YBX1_Down
ILMN_1732296	4.55e-07	2.9e-08	-6.04451	8.40167	-1.23863	ID3	inhibitor of DNA binding 3, HLH protein	Down	ID3_Down
ILMN_1751120	4.61e-07	2.94e-08	6.04144	8.38826	1.07549	HIST1H4H	histone cluster 1, H4h	Up	HIST1H4H_Up
ILMN_1773395	4.81e-07	3.07e-08	-6.03144	8.34453	-1.63331	RDH5	retinol dehydrogenase 5	Down	RDH5_Down
ILMN_1777759	4.95e-07	3.17e-08	6.02472	8.31513	1.18242	FIGNL2	fidgetin like 2	Up	FIGNL2_Up
ILMN_1742798	5.08e-07	3.26e-08	-6.01829	8.28704	-1.06327	TRA2B	transformer 2 beta homolog (Drosophila)	Down	TRA2B_Down
ILMN_1725366	5.12e-07	3.29e-08	-6.01621	8.27797	-1.64072	SLC27A5	solute carrier family 27 member 5	Down	SLC27A5_Down
ILMN_1657683	5.21e-07	3.35e-08	6.01239	8.26129	1.04822	C1orf198	chromosome 1 open reading frame 198	Up	C1orf198_Up
ILMN_1810942	5.48e-07	3.54e-08	-5.99968	8.20582	-1.7984	CYP3A5	cytochrome P450 family 3 subfamily A member 5	Down	CYP3A5_Down
ILMN_1798177	5.72e-07	3.71e-08	-5.98908	8.15962	-1.22516	CHURC1	churchill domain containing 1	Down	CHURC1_Down
ILMN_1786847	5.79e-07	3.77e-08	5.98571	8.14495	1.78483	TGM3	transglutaminase 3	Up	TGM3_Up
ILMN_1768176	5.85e-07	3.81e-08	-5.9834	8.13486	-1.02178	PBDC1	polysaccharide biosynthesis domain containing 1	Down	PBDC1_Down
ILMN_1700831	5.91e-07	3.85e-08	-5.98094	8.12417	-1.37833	SLC27A2	solute carrier family 27 member 2	Down	SLC27A2_Down
ILMN_1757106	6.05e-07	3.95e-08	5.97514	8.09891	1.26206	MARCH6	membrane associated ring-CH-type finger 6	Up	MARCH6_Up
ILMN_1808657	6.14e-07	4.02e-08	-5.97112	8.08139	-1.57572	FMO3	flavin containing monooxygenase 3	Down	FMO3_Down
ILMN_1741021	6.35e-07	4.18e-08	-5.96262	8.04441	-1.4358	CH25H	cholesterol 25-hydroxylase	Down	CH25H_Down
ILMN_1696708	6.4e-07	4.23e-08	-5.9602	8.03392	-1.09259	C14orf166	chromosome 14 open reading frame 166	Down	C14orf166_Down
ILMN_1651568	6.45e-07	4.26e-08	5.9582	8.0252	2.0831	MUC13	mucin 13, cell surface associated	Up	MUC13_Up
ILMN_1737988	6.47e-07	4.28e-08	-5.95744	8.02188	-1.15637	PRNP	prion protein	Down	PRNP_Down
ILMN_1803676	6.64e-07	4.4e-08	-5.95106	7.99417	-1.21264	ENOSF1	enolase superfamily member 1	Down	ENOSF1_Down
ILMN_2228976	6.83e-07	4.55e-08	-5.94378	7.96255	-1.2296	EIF1AY	eukaryotic translation initiation factor 1A, Y-linked	Down	EIF1AY_Down
ILMN_1685480	6.88e-07	4.58e-08	-5.942	7.95481	-1.00831	TARS	threonyl-tRNA synthetase	Down	TARS_Down
ILMN_1717557	7.02e-07	4.68e-08	-5.93708	7.93346	-2.20825	LECT2	leukocyte cell derived chemotaxin 2	Down	LECT2_Down
ILMN_1785284	7.09e-07	4.74e-08	-5.93444	7.92198	-1.10824	ALDH6A1	aldehyde dehydrogenase 6 family member A1	Down	ALDH6A1_Down
ILMN_1708006	7.2e-07	4.83e-08	5.93039	7.9044	1.19135	MICB	MHC class I polypeptide-related sequence B	Up	MICB_Up
ILMN_1671621	7.28e-07	4.89e-08	-5.92749	7.89184	-1.24215	PCMT1	protein-L-isoaspartate (D-aspartate) O-methyltransferase	Down	PCMT1_Down
ILMN_1714167	7.4e-07	4.97e-08	-5.92379	7.8758	-1.30113	CYB5A	cytochrome b5 type A	Down	CYB5A_Down
ILMN_1756417	7.48e-07	5.03e-08	-5.9211	7.86414	-1.29002	ANKRD37	ankyrin repeat domain 37	Down	ANKRD37_Down
ILMN_1744381	8.29e-07	5.62e-08	-5.89623	7.75642	-1.4759	SERPINE1	serpin family E member 1	Down	SERPINE1_Down
ILMN_1724493	8.86e-07	6.05e-08	-5.87964	7.68464	-1.23833	LYSMD2	LysM domain containing 2	Down	LYSMD2_Down
ILMN_1662944	8.89e-07	6.08e-08	-5.87845	7.67953	-1.24302	PON1	paraoxonase 1	Down	PON1_Down
ILMN_1742073	8.96e-07	6.12e-08	-5.8767	7.67198	-1.03436	ADCY1	adenylate cyclase 1	Down	ADCY1_Down
ILMN_1676099	8.96e-07	6.13e-08	5.87667	7.67182	1.0163	SPON2	spondin 2	Up	SPON2_Up
ILMN_1783394	9.06e-07	6.21e-08	-5.87372	7.6591	-1.26143	ATF4	activating transcription factor 4	Down	ATF4_Down
ILMN_1653794	9.09e-07	6.22e-08	-5.87302	7.65605	-1.04095	SNHG5	small nucleolar RNA host gene 5	Down	SNHG5_Down
ILMN_1656837	9.31e-07	6.39e-08	-5.86697	7.62994	-1.92531	RBP1	retinol binding protein 1	Down	RBP1_Down
ILMN_1762142	1.07e-06	7.46e-08	5.83215	7.47982	1.10447	CDCA7	cell division cycle associated 7	Up	CDCA7_Up
ILMN_1735816	1.11e-06	7.71e-08	-5.8247	7.44777	-1.55519	CYP4A11	cytochrome P450 family 4 subfamily A member 11	Down	CYP4A11_Down
ILMN_1709795	1.21e-06	8.5e-08	-5.80249	7.35228	-1.02357	RAC2	ras-related C3 botulinum toxin substrate 2 (rho family, small GTP binding protein Rac2)	Down	RAC2_Down
ILMN_1661799	1.22e-06	8.59e-08	-5.8002	7.34246	-1.0767	HIGD1A	HIG1 hypoxia inducible domain family member 1A	Down	HIGD1A_Down
ILMN_1678816	1.35e-06	9.58e-08	-5.77537	7.23592	-1.17742	GREM2	gremlin 2, DAN family BMP antagonist	Down	GREM2_Down
ILMN_1760748	1.36e-06	9.63e-08	-5.77419	7.23091	-1.08201	PBLD	phenazine biosynthesis like protein domain containing	Down	PBLD_Down
ILMN_1666670	1.39e-06	9.85e-08	-5.76905	7.20886	-1.2379	RBX1	ring-box 1	Down	RBX1_Down
ILMN_2386444	1.42e-06	1.01e-07	-5.76283	7.18223	-1.13792	ANGPTL4	angiopoietin like 4	Down	ANGPTL4_Down
ILMN_1671337	1.45e-06	1.03e-07	5.75811	7.16201	1.40637	SLC2A5	solute carrier family 2 member 5	Up	SLC2A5_Up
ILMN_1804332	1.45e-06	1.03e-07	5.75778	7.1606	1.09282	GPR137	G protein-coupled receptor 137	Up	GPR137_Up
ILMN_1663313	1.48e-06	1.06e-07	-5.75216	7.13655	-1.35272	AMY1C	amylase, alpha 1C (salivary)	Down	AMY1C_Down
ILMN_1671891	1.5e-06	1.07e-07	-5.74948	7.12509	-1.04511	PID1	phosphotyrosine interaction domain containing 1	Down	PID1_Down
ILMN_1711729	1.55e-06	1.12e-07	-5.74058	7.08707	-1.16393	UQCRBP1	ubiquinol-cytochrome c reductase binding protein pseudogene 1	Down	UQCRBP1_Down
ILMN_1689378	1.66e-06	1.2e-07	-5.72387	7.01572	-1.10171	NOCT	nocturnin	Down	NOCT_Down
ILMN_1764309	1.87e-06	1.38e-07	-5.69289	6.88372	-1.57026	ADH1A	alcohol dehydrogenase 1A (class I), alpha polypeptide	Down	ADH1A_Down
ILMN_1785265	1.9e-06	1.4e-07	-5.6895	6.86927	-1.02281	PLS3	plastin 3	Down	PLS3_Down
ILMN_1720158	2.04e-06	1.51e-07	-5.67164	6.79333	-1.01051	ETS2	ETS proto-oncogene 2, transcription factor	Down	ETS2_Down
ILMN_1800414	2.1e-06	1.56e-07	5.66448	6.76294	1.07066	NBPF9	neuroblastoma breakpoint family member 9	Up	NBPF9_Up
ILMN_1776112	2.21e-06	1.65e-07	-5.65135	6.70726	-2.16447	SLC10A1	solute carrier family 10 member 1	Down	SLC10A1_Down
ILMN_1772218	2.21e-06	1.65e-07	-5.65094	6.7055	-1.42882	HLA-DPA1	major histocompatibility complex, class II, DP alpha 1	Down	HLA-DPA1_Down
ILMN_1698144	2.27e-06	1.7e-07	-5.64451	6.67826	-1.07861	CFH	complement factor H	Down	CFH_Down
ILMN_1666731	2.36e-06	1.77e-07	5.63507	6.63828	1.10445	SSUH2	ssu-2 homolog (C. elegans)	Up	SSUH2_Up
ILMN_1727091	2.42e-06	1.82e-07	-5.62868	6.61123	-1.29858	ACMSD	aminocarboxymuconate semialdehyde decarboxylase	Down	ACMSD_Down
ILMN_1658639	2.45e-06	1.84e-07	-5.62578	6.59894	-1.32314	SLC46A3	solute carrier family 46 member 3	Down	SLC46A3_Down
ILMN_1735489	2.45e-06	1.85e-07	-5.62472	6.59447	-1.34326	F13B	coagulation factor XIII B chain	Down	F13B_Down
ILMN_1704376	2.6e-06	1.97e-07	5.61065	6.53495	1.25508	GLDN	gliomedin	Up	GLDN_Up
ILMN_1754178	2.64e-06	2.01e-07	-5.60632	6.51667	-1.29931	GDI2	GDP dissociation inhibitor 2	Down	GDI2_Down
ILMN_1752502	2.68e-06	2.04e-07	5.60287	6.50209	1.57039	HKDC1	hexokinase domain containing 1	Up	HKDC1_Up
ILMN_1653120	2.7e-06	2.05e-07	-5.60102	6.49429	-1.08863	ST6GAL1	ST6 beta-galactoside alpha-2,6-sialyltransferase 1	Down	ST6GAL1_Down
ILMN_2315044	2.72e-06	2.07e-07	-5.59897	6.48565	-1.13134	FGG	fibrinogen gamma chain	Down	FGG_Down
ILMN_2387553	2.82e-06	2.15e-07	-5.58993	6.4475	-1.04266	PSMA3	proteasome subunit alpha 3	Down	PSMA3_Down
ILMN_1682226	2.97e-06	2.28e-07	5.57687	6.39245	1.2483	CLDN15	claudin 15	Up	CLDN15_Up
ILMN_1797154	3.1e-06	2.39e-07	-5.56623	6.34764	-1.18125	AZGP1	alpha-2-glycoprotein 1, zinc-binding	Down	AZGP1_Down
ILMN_1752755	3.21e-06	2.48e-07	5.55705	6.30904	1.16919	VWF	von Willebrand factor	Up	VWF_Up
ILMN_1786720	3.26e-06	2.52e-07	-5.55337	6.29356	-1.24959	PROM1	prominin 1	Down	PROM1_Down
ILMN_2408764	3.33e-06	2.59e-07	-5.54758	6.26926	-2.07392	CYP2A7	cytochrome P450 family 2 subfamily A member 7	Down	CYP2A7_Down
ILMN_2062468	3.45e-06	2.69e-07	-5.53858	6.23144	-1.2334	IGFBP7	insulin like growth factor binding protein 7	Down	IGFBP7_Down
ILMN_2079890	3.49e-06	2.73e-07	-5.53545	6.21829	-1.51492	G6PC	glucose-6-phosphatase catalytic subunit	Down	G6PC_Down
ILMN_1730101	3.52e-06	2.75e-07	-5.53299	6.20798	-1.08488	GSPT2	G1 to S phase transition 2	Down	GSPT2_Down
ILMN_1701507	3.56e-06	2.79e-07	-5.5301	6.19589	-1.55273	EHHADH	enoyl-CoA, hydratase/3-hydroxyacyl CoA dehydrogenase	Down	EHHADH_Down
ILMN_2404688	3.59e-06	2.81e-07	5.5282	6.18789	1.09344	NUPR1	nuclear protein 1, transcriptional regulator	Up	NUPR1_Up
ILMN_1778401	3.59e-06	2.81e-07	-5.528	6.18707	-1.14007	HLA-B	major histocompatibility complex, class I, B	Down	HLA-B_Down
ILMN_1787843	3.74e-06	2.94e-07	-5.51783	6.14443	-1.30657	HSDL2	hydroxysteroid dehydrogenase like 2	Down	HSDL2_Down
ILMN_1742167	4.07e-06	3.23e-07	5.49608	6.05339	1.017	TUBA1C	tubulin alpha 1c	Up	TUBA1C_Up
ILMN_1732534	4.17e-06	3.32e-07	-5.48992	6.02764	-1.05122	CHMP5	charged multivesicular body protein 5	Down	CHMP5_Down
ILMN_1758049	4.23e-06	3.37e-07	-5.48606	6.01154	-1.03373	NFIA	nuclear factor I A	Down	NFIA_Down
ILMN_1801216	4.24e-06	3.38e-07	5.48524	6.00807	2.56895	S100P	S100 calcium binding protein P	Up	S100P_Up
ILMN_1802699	4.27e-06	3.41e-07	-5.48372	6.00176	-1.0133	PCK2	phosphoenolpyruvate carboxykinase 2, mitochondrial	Down	PCK2_Down
ILMN_1702487	4.3e-06	3.43e-07	-5.48173	5.99343	-1.03591	SGK1	serum/glucocorticoid regulated kinase 1	Down	SGK1_Down
ILMN_1708934	4.3e-06	3.44e-07	-5.4815	5.99247	-1.06533	ADM	adrenomedullin	Down	ADM_Down
ILMN_1731194	4.36e-06	3.49e-07	-5.47832	5.97921	-1.00836	STRAP	serine/threonine kinase receptor associated protein	Down	STRAP_Down
ILMN_1665437	4.45e-06	3.57e-07	-5.47299	5.95694	-2.67398	CYP2E1	cytochrome P450 family 2 subfamily E member 1	Down	CYP2E1_Down
ILMN_1750324	4.48e-06	3.6e-07	-5.47078	5.94774	-1.05534	IGFBP5	insulin like growth factor binding protein 5	Down	IGFBP5_Down
ILMN_1785474	4.54e-06	3.64e-07	-5.46791	5.93576	-1.3522	ACOT12	acyl-CoA thioesterase 12	Down	ACOT12_Down
ILMN_1782579	4.66e-06	3.76e-07	-5.46057	5.90518	-1.17753	IMMT	inner membrane mitochondrial protein	Down	IMMT_Down
ILMN_1722830	4.76e-06	3.85e-07	5.45527	5.88309	1.1009	MAGEA1	MAGE family member A1	Up	MAGEA1_Up
ILMN_2157441	4.83e-06	3.91e-07	-5.4513	5.86654	-1.28192	HLA-DRA	major histocompatibility complex, class II, DR alpha	Down	HLA-DRA_Down
ILMN_2087080	4.84e-06	3.92e-07	-5.45067	5.86394	-1.10264	RPL5	ribosomal protein L5	Down	RPL5_Down
ILMN_2180864	4.89e-06	3.97e-07	-5.44781	5.85204	-1.12979	RPS26P11	ribosomal protein S26 pseudogene 11	Down	RPS26P11_Down
ILMN_1668507	5.12e-06	4.17e-07	-5.43646	5.80482	-1.24688	DDAH1	dimethylarginine dimethylaminohydrolase 1	Down	DDAH1_Down
ILMN_1674658	5.18e-06	4.22e-07	5.43358	5.79285	1.89792	COX7B2	cytochrome c oxidase subunit 7B2	Up	COX7B2_Up
ILMN_1776602	5.22e-06	4.26e-07	-5.43126	5.7832	-1.38439	RNASE4	ribonuclease A family member 4	Down	RNASE4_Down
ILMN_1677885	5.75e-06	4.74e-07	-5.40652	5.68053	-1.00552	FMO4	flavin containing monooxygenase 4	Down	FMO4_Down
ILMN_1765204	5.95e-06	4.94e-07	-5.39663	5.63954	-1.43962	ST13	suppression of tumorigenicity 13 (colon carcinoma) (Hsp70 interacting protein)	Down	ST13_Down
ILMN_1718424	6.28e-06	5.25e-07	-5.38246	5.58089	-1.21199	MRPS28	mitochondrial ribosomal protein S28	Down	MRPS28_Down
ILMN_1667670	6.39e-06	5.36e-07	-5.37775	5.56144	-1.0793	SLC25A15	solute carrier family 25 member 15	Down	SLC25A15_Down
ILMN_1665855	6.58e-06	5.54e-07	-5.36989	5.52893	-1.41757	CFHR4	complement factor H related 4	Down	CFHR4_Down
ILMN_1659437	6.73e-06	5.68e-07	-5.36398	5.50455	-1.4369	TXNDC17	thioredoxin domain containing 17	Down	TXNDC17_Down
ILMN_2369682	7.16e-06	6.08e-07	-5.348	5.43863	-1.25434	HNRNPA2B1	heterogeneous nuclear ribonucleoprotein A2/B1	Down	HNRNPA2B1_Down
ILMN_1696243	7.33e-06	6.25e-07	5.34167	5.41252	1.11112	STMND1	stathmin domain containing 1	Up	STMND1_Up
ILMN_1670130	7.42e-06	6.33e-07	5.3384	5.39908	1.2241	ARID3A	AT-rich interaction domain 3A	Up	ARID3A_Up
ILMN_1755536	7.84e-06	6.72e-07	-5.32455	5.34208	-1.18175	PFDN5	prefoldin subunit 5	Down	PFDN5_Down
ILMN_1782788	8.03e-06	6.9e-07	-5.31812	5.31565	-1.028	YBX3	Y-box binding protein 3	Down	YBX3_Down
ILMN_2349071	8.22e-06	7.08e-07	5.31197	5.29039	1.05351	ADGRG2	adhesion G protein-coupled receptor G2	Up	ADGRG2_Up
ILMN_2278335	8.24e-06	7.1e-07	5.31144	5.2882	1.16576	AKR1B15	aldo-keto reductase family 1 member B15	Up	AKR1B15_Up
ILMN_1692983	8.84e-06	7.67e-07	-5.29322	5.21343	-1.69978	SULT2A1	sulfotransferase family 2A member 1	Down	SULT2A1_Down
ILMN_1717639	8.89e-06	7.72e-07	-5.29165	5.20702	-1.01649	SIK1	salt inducible kinase 1	Down	SIK1_Down
ILMN_2213558	1.04e-05	9.12e-07	-5.25209	5.04523	-1.38242	TMED10P1	transmembrane p24 trafficking protein 10 pseudogene 1	Down	TMED10P1_Down
ILMN_1731785	1.08e-05	9.55e-07	-5.2413	5.0012	-1.18456	ORM2	orosomucoid 2	Down	ORM2_Down
ILMN_1692223	1.09e-05	9.69e-07	5.23778	4.98685	2.09765	LCN2	lipocalin 2	Up	LCN2_Up
ILMN_1725311	1.1e-05	9.76e-07	-5.23602	4.97967	-2.36824	GCGR	glucagon receptor	Down	GCGR_Down
ILMN_1708611	1.12e-05	1e-06	-5.23028	4.95629	-1.07013	RDX	radixin	Down	RDX_Down
ILMN_1745688	1.14e-05	1.01e-06	-5.22673	4.94183	-2.13201	HPD	4-hydroxyphenylpyruvate dioxygenase	Down	HPD_Down
ILMN_1754055	1.24e-05	1.11e-06	-5.2046	4.85185	-1.65878	APOA5	apolipoprotein A5	Down	APOA5_Down
ILMN_2183687	1.25e-05	1.13e-06	-5.20153	4.83941	-1.15323	LIME1	Lck interacting transmembrane adaptor 1	Down	LIME1_Down
ILMN_1750312	1.3e-05	1.18e-06	5.19143	4.79841	1.16026	SLC51B	solute carrier family 51 beta subunit	Up	SLC51B_Up
ILMN_2260643	1.31e-05	1.19e-06	-5.18813	4.78505	-1.10477	LPA	lipoprotein(a)	Down	LPA_Down
ILMN_1789702	1.47e-05	1.35e-06	-5.1577	4.66186	-1.19498	GBE1	glucan (1,4-alpha-), branching enzyme 1	Down	GBE1_Down
ILMN_1796734	1.51e-05	1.39e-06	-5.15222	4.63973	-1.05966	SPARC	secreted protein acidic and cysteine rich	Down	SPARC_Down
ILMN_1728445	1.52e-05	1.4e-06	-5.14921	4.62757	-1.59488	IGFBP1	insulin like growth factor binding protein 1	Down	IGFBP1_Down
ILMN_1736178	1.53e-05	1.41e-06	-5.14847	4.62461	-1.20226	AEBP1	AE binding protein 1	Down	AEBP1_Down
ILMN_1746128	1.53e-05	1.41e-06	-5.1484	4.62433	-1.27149	ACSM2B	acyl-CoA synthetase medium-chain family member 2B	Down	ACSM2B_Down
ILMN_1811114	1.57e-05	1.46e-06	-5.14035	4.59183	-2.47269	SDS	serine dehydratase	Down	SDS_Down
ILMN_1737041	1.59e-05	1.47e-06	-5.13788	4.58188	-1.36458	HABP2	hyaluronan binding protein 2	Down	HABP2_Down
ILMN_2093810	1.61e-05	1.5e-06	-5.13361	4.56464	-1.0647	POMP	proteasome maturation protein	Down	POMP_Down
ILMN_1801852	1.79e-05	1.68e-06	-5.10638	4.45507	-1.26974	SEC61B	Sec61 translocon beta subunit	Down	SEC61B_Down
ILMN_1672389	1.83e-05	1.72e-06	-5.10045	4.43128	-1.33806	CRYZ	crystallin zeta	Down	CRYZ_Down
ILMN_1785902	1.84e-05	1.73e-06	-5.09838	4.42296	-1.17444	C1QC	complement C1q C chain	Down	C1QC_Down
ILMN_1769810	1.91e-05	1.81e-06	-5.08823	4.38223	-1.01427	ARL6IP5	ADP ribosylation factor like GTPase 6 interacting protein 5	Down	ARL6IP5_Down
ILMN_1750062	1.92e-05	1.82e-06	-5.08666	4.37596	-1.25238	PPARGC1A	PPARG coactivator 1 alpha	Down	PPARGC1A_Down
ILMN_1770127	1.98e-05	1.88e-06	-5.07843	4.34295	-1.00277	DNAJA2	DnaJ heat shock protein family (Hsp40) member A2	Down	DNAJA2_Down
ILMN_2045324	2.1e-05	2.02e-06	-5.06194	4.27696	-1.38948	CCL16	C-C motif chemokine ligand 16	Down	CCL16_Down
ILMN_1684497	2.22e-05	2.14e-06	-5.04754	4.21943	-1.20139	PYROXD2	pyridine nucleotide-disulphide oxidoreductase domain 2	Down	PYROXD2_Down
ILMN_2398107	3.16e-05	3.15e-06	4.95311	3.84456	1.18358	ASNS	asparagine synthetase (glutamine-hydrolyzing)	Up	ASNS_Up
ILMN_1804357	3.31e-05	3.33e-06	4.9399	3.79246	1.11069	GNG4	G protein subunit gamma 4	Up	GNG4_Up
ILMN_1736238	3.35e-05	3.37e-06	-4.93714	3.78158	-1.65092	GNMT	glycine N-methyltransferase	Down	GNMT_Down
ILMN_1794844	3.53e-05	3.58e-06	-4.92237	3.72345	-2.01874	THRSP	thyroid hormone responsive	Down	THRSP_Down
ILMN_2221808	3.53e-05	3.58e-06	-4.92199	3.72194	-1.08675	DGCR5	DiGeorge syndrome critical region gene 5 (non-protein coding)	Down	DGCR5_Down
ILMN_1661750	3.71e-05	3.78e-06	4.90889	3.67046	1.02694	VIL1	villin 1	Up	VIL1_Up
ILMN_2210837	3.91e-05	4e-06	-4.89458	3.61431	-1.04658	CDC26	cell division cycle 26	Down	CDC26_Down
ILMN_1773079	3.92e-05	4.02e-06	-4.89385	3.61145	-1.3962	COL3A1	collagen type III alpha 1 chain	Down	COL3A1_Down
ILMN_2354953	3.94e-05	4.04e-06	4.89245	3.60597	1.91014	NQO1	NAD(P)H quinone dehydrogenase 1	Up	NQO1_Up
ILMN_1788468	4.08e-05	4.2e-06	-4.88288	3.56846	-1.1319	ARGLU1	arginine and glutamate rich 1	Down	ARGLU1_Down
ILMN_1697967	4.22e-05	4.36e-06	-4.87338	3.5313	-1.22607	UGT1A4	UDP glucuronosyltransferase family 1 member A4	Down	UGT1A4_Down
ILMN_1789751	4.22e-05	4.36e-06	-4.87329	3.53095	-1.2493	MFSD1	major facilitator superfamily domain containing 1	Down	MFSD1_Down
ILMN_2389501	4.26e-05	4.42e-06	-4.87045	3.51986	-1.93732	HSD11B1	hydroxysteroid 11-beta dehydrogenase 1	Down	HSD11B1_Down
ILMN_1806349	4.28e-05	4.44e-06	4.86909	3.51451	1.06153	SLC6A8	solute carrier family 6 member 8	Up	SLC6A8_Up
ILMN_2186482	4.38e-05	4.55e-06	-4.86277	3.48985	-1.0113	TMED7	transmembrane p24 trafficking protein 7	Down	TMED7_Down
ILMN_1811068	4.43e-05	4.61e-06	4.86002	3.47911	1.02926	CABYR	calcium binding tyrosine phosphorylation regulated	Up	CABYR_Up
ILMN_2070792	4.8e-05	5.05e-06	-4.83715	3.38994	-1.14328	ACSM5	acyl-CoA synthetase medium-chain family member 5	Down	ACSM5_Down
ILMN_2247572	4.84e-05	5.1e-06	4.8347	3.3804	1.1661	SSX1	SSX family member 1	Up	SSX1_Up
ILMN_1808674	5.05e-05	5.35e-06	-4.82287	3.33442	-1.08343	CPN1	carboxypeptidase N subunit 1	Down	CPN1_Down
ILMN_1702447	5.12e-05	5.44e-06	4.81858	3.31774	1.1282	IGF2BP2	insulin like growth factor 2 mRNA binding protein 2	Up	IGF2BP2_Up
ILMN_1731292	5.31e-05	5.66e-06	-4.80889	3.28015	-1.31009	CA5A	carbonic anhydrase 5A	Down	CA5A_Down
ILMN_1687858	5.59e-05	6e-06	-4.79455	3.22457	-1.17489	CALM2	calmodulin 2	Down	CALM2_Down
ILMN_1807423	5.65e-05	6.06e-06	4.79194	3.21448	1.00968	IGF2BP3	insulin like growth factor 2 mRNA binding protein 3	Up	IGF2BP3_Up
ILMN_1695946	5.67e-05	6.09e-06	4.79059	3.20923	1.46746	TRNP1	TMF1-regulated nuclear protein 1	Up	TRNP1_Up
ILMN_1791123	6.17e-05	6.68e-06	-4.76759	3.12035	-1.03672	TMPRSS2	transmembrane protease, serine 2	Down	TMPRSS2_Down
ILMN_2047511	6.5e-05	7.06e-06	-4.75381	3.06724	-1.10575	ADAP1	ArfGAP with dual PH domains 1	Down	ADAP1_Down
ILMN_1701603	7.16e-05	7.86e-06	-4.72696	2.964	-1.29124	ALPL	alkaline phosphatase, liver/bone/kidney	Down	ALPL_Down
ILMN_1779855	7.21e-05	7.91e-06	-4.72518	2.95715	-1.57323	HSD17B6	hydroxysteroid 17-beta dehydrogenase 6	Down	HSD17B6_Down
ILMN_1709634	7.4e-05	8.15e-06	-4.71788	2.92918	-1.10656	CMBL	carboxymethylenebutenolidase homolog	Down	CMBL_Down
ILMN_1831345	7.57e-05	8.35e-06	4.71174	2.90565	1.07883	SOX9-AS1	SOX9 antisense RNA 1	Up	SOX9-AS1_Up
ILMN_1751258	7.88e-05	8.74e-06	-4.70017	2.86136	-1.20881	NDUFA4	NDUFA4, mitochondrial complex associated	Down	NDUFA4_Down
ILMN_2045453	7.91e-05	8.77e-06	-4.69932	2.85811	-1.26818	CFHR2	complement factor H related 2	Down	CFHR2_Down
ILMN_1767113	8.13e-05	9.04e-06	-4.69161	2.82864	-1.50689	AOX1	aldehyde oxidase 1	Down	AOX1_Down
ILMN_2290808	8.24e-05	9.18e-06	-4.6878	2.81406	-1.32144	RPL21	ribosomal protein L21	Down	RPL21_Down
ILMN_1714446	8.75e-05	9.82e-06	-4.67084	2.74937	-1.27046	PLG	plasminogen	Down	PLG_Down
ILMN_1674574	9.16e-05	1.03e-05	-4.65816	2.7011	-1.30726	VNN1	vanin 1	Down	VNN1_Down
ILMN_1656638	9.42e-05	1.06e-05	-4.65039	2.67157	-1.67601	BHMT	betaine--homocysteine S-methyltransferase	Down	BHMT_Down
ILMN_1701681	9.71e-05	1.1e-05	-4.64162	2.63827	-1.0528	SEC11C	SEC11 homolog C, signal peptidase complex subunit	Down	SEC11C_Down
ILMN_2088876	9.82e-05	1.12e-05	4.63844	2.62618	1.06782	MAGEC2	MAGE family member C2	Up	MAGEC2_Up
ILMN_2382942	9.84e-05	1.12e-05	4.63766	2.62325	1.15971	CA12	carbonic anhydrase 12	Up	CA12_Up
ILMN_1784523	0.000101	1.16e-05	-4.62967	2.59294	-1.07122	ATP6V1G1	ATPase H+ transporting V1 subunit G1	Down	ATP6V1G1_Down
ILMN_1680110	0.000102	1.17e-05	-4.62607	2.57931	-1.24797	ADIRF	adipogenesis regulatory factor	Down	ADIRF_Down
ILMN_1657234	0.000103	1.17e-05	4.6255	2.57715	1.29858	CCL20	C-C motif chemokine ligand 20	Up	CCL20_Up
ILMN_1679646	0.000104	1.19e-05	-4.62272	2.56662	-1.40209	FTCD	formimidoyltransferase cyclodeaminase	Down	FTCD_Down
ILMN_1670512	0.000104	1.19e-05	-4.62156	2.56224	-1.05567	PXMP2	peroxisomal membrane protein 2	Down	PXMP2_Down
ILMN_1656242	0.00011	1.27e-05	-4.6055	2.50154	-1.0583	C1R	complement C1r subcomponent	Down	C1R_Down
ILMN_1708833	0.00011	1.28e-05	-4.60443	2.4975	-1.06178	APCS	amyloid P component, serum	Down	APCS_Down
ILMN_1686573	0.000113	1.31e-05	-4.59833	2.47445	-2.03638	DEFB1	defensin beta 1	Down	DEFB1_Down
ILMN_2166716	0.000115	1.34e-05	4.59182	2.44993	1.45016	VCX3B	variable charge, X-linked 3B	Up	VCX3B_Up
ILMN_1659984	0.000124	1.45e-05	4.57171	2.37424	1.41506	MEP1A	meprin A subunit alpha	Up	MEP1A_Up
ILMN_1760727	0.000129	1.52e-05	-4.55943	2.32811	-1.07004	ANG	angiogenin	Down	ANG_Down
ILMN_1701831	0.000137	1.62e-05	-4.54326	2.2675	-1.38883	GSTA1	glutathione S-transferase alpha 1	Down	GSTA1_Down
ILMN_1669114	0.000148	1.78e-05	4.51961	2.17909	1.03277	WNK4	WNK lysine deficient protein kinase 4	Up	WNK4_Up
ILMN_2091632	0.000161	1.94e-05	-4.49714	2.09539	-1.94002	CYP2A6	cytochrome P450 family 2 subfamily A member 6	Down	CYP2A6_Down
ILMN_1712082	0.000173	2.1e-05	4.47689	2.02018	1.26342	GCNT3	glucosaminyl (N-acetyl) transferase 3, mucin type	Up	GCNT3_Up
ILMN_1684886	0.000182	2.23e-05	4.46084	1.96074	1.42223	VCX	variable charge, X-linked	Up	VCX_Up
ILMN_1795484	0.000192	2.36e-05	4.44585	1.90536	1.62431	PGC	progastricsin	Up	PGC_Up
ILMN_1705243	0.000205	2.54e-05	-4.42691	1.83554	-1.31225	SERPINA7	serpin family A member 7	Down	SERPINA7_Down
ILMN_1669273	0.00022	2.75e-05	-4.40634	1.75993	-1.0726	PPT1	palmitoyl-protein thioesterase 1	Down	PPT1_Down
ILMN_1684158	0.000222	2.77e-05	-4.40442	1.75287	-1.06816	GPT2	glutamic--pyruvic transaminase 2	Down	GPT2_Down
ILMN_1809384	0.000224	2.81e-05	-4.4013	1.74143	-1.06627	CYP4F12	cytochrome P450 family 4 subfamily F member 12	Down	CYP4F12_Down
ILMN_1685258	0.000239	3.01e-05	-4.38284	1.67381	-1.06928	TMEM14B	transmembrane protein 14B	Down	TMEM14B_Down
ILMN_1686259	0.000242	3.06e-05	-4.37876	1.65891	-1.07723	PRODH2	proline dehydrogenase 2	Down	PRODH2_Down
ILMN_1714577	0.000242	3.07e-05	-4.37799	1.65609	-1.16903	OGDHL	oxoglutarate dehydrogenase-like	Down	OGDHL_Down
ILMN_1801307	0.000247	3.13e-05	-4.37254	1.6362	-1.02845	TNFSF10	tumor necrosis factor superfamily member 10	Down	TNFSF10_Down
ILMN_1674097	0.000247	3.13e-05	4.37247	1.63594	1.70922	GAGE2B	G antigen 2B	Up	GAGE2B_Up
ILMN_1694034	0.000266	3.42e-05	4.34977	1.55318	1.42515	LGALS4	galectin 4	Up	LGALS4_Up
ILMN_1684106	0.00028	3.62e-05	-4.33474	1.49857	-1.13343	NR1I3	nuclear receptor subfamily 1 group I member 3	Down	NR1I3_Down
ILMN_1810233	0.000281	3.63e-05	-4.33391	1.49554	-1.16562	UGT2B11	UDP glucuronosyltransferase family 2 member B11	Down	UGT2B11_Down
ILMN_1715068	0.000283	3.66e-05	-4.33162	1.48723	-1.65611	AQP9	aquaporin 9	Down	AQP9_Down
ILMN_1690884	0.000295	3.84e-05	-4.31914	1.442	-1.09903	APOA1	apolipoprotein A1	Down	APOA1_Down
ILMN_1748697	0.000295	3.84e-05	4.31901	1.44152	1.00705	LIN28B	lin-28 homolog B	Up	LIN28B_Up
ILMN_1707070	0.000298	3.88e-05	-4.31614	1.43113	-1.10172	PCOLCE	procollagen C-endopeptidase enhancer	Down	PCOLCE_Down
ILMN_1796316	0.000302	3.95e-05	4.31166	1.41492	1.15202	MMP9	matrix metallopeptidase 9	Up	MMP9_Up
ILMN_1771308	0.000302	3.95e-05	-4.31143	1.4141	-1.02725	BAAT	bile acid-CoA:amino acid N-acyltransferase	Down	BAAT_Down
ILMN_1809212	0.00032	4.2e-05	-4.2955	1.35654	-1.22196	HPR	haptoglobin-related protein	Down	HPR_Down
ILMN_1686291	0.000331	4.36e-05	-4.2853	1.31978	-1.22513	DIO1	deiodinase, iodothyronine type I	Down	DIO1_Down
ILMN_1669113	0.000339	4.47e-05	-4.2785	1.29529	-1.31366	ATF5	activating transcription factor 5	Down	ATF5_Down
ILMN_1664660	0.000346	4.57e-05	4.27252	1.27379	1.69603	GAGE12G	G antigen 12G	Up	GAGE12G_Up
ILMN_1715638	0.000349	4.62e-05	4.26996	1.26457	1.55162	GAGE4	G antigen 4	Up	GAGE4_Up
ILMN_1688702	0.000377	5.04e-05	-4.24682	1.18156	-1.06686	PJA2	praja ring finger ubiquitin ligase 2	Down	PJA2_Down
ILMN_1767349	0.000382	5.12e-05	-4.24247	1.166	-1.14395	ABCB4	ATP binding cassette subfamily B member 4	Down	ABCB4_Down
ILMN_1749114	0.000427	5.78e-05	-4.21016	1.05067	-1.51274	OTC	ornithine carbamoyltransferase	Down	OTC_Down
ILMN_1787556	0.000431	5.85e-05	-4.20683	1.03885	-1.42268	NPC1L1	NPC1 like intracellular cholesterol transporter 1	Down	NPC1L1_Down
ILMN_1718136	0.00046	6.29e-05	-4.18751	0.970213	-1.03268	UQCRHL	ubiquinol-cytochrome c reductase hinge protein like	Down	UQCRHL_Down
ILMN_2170353	0.000471	6.46e-05	-4.18017	0.944205	-1.06969	HACD2	3-hydroxyacyl-CoA dehydratase 2	Down	HACD2_Down
ILMN_2048414	0.000477	6.56e-05	-4.17598	0.929369	-1.37517	UGT2B15	UDP glucuronosyltransferase family 2 member B15	Down	UGT2B15_Down
ILMN_2127767	0.000479	6.59e-05	4.17496	0.925745	1.46806	GAGE5	G antigen 5	Up	GAGE5_Up
ILMN_2206746	0.000506	7.02e-05	-4.15782	0.865188	-1.06221	BGN	biglycan	Down	BGN_Down
ILMN_1811468	0.000521	7.25e-05	4.14892	0.833809	1.41526	IRX3	iroquois homeobox 3	Up	IRX3_Up
ILMN_1686989	0.000531	7.42e-05	-4.14297	0.812842	-1.01916	INSIG1	insulin induced gene 1	Down	INSIG1_Down
ILMN_1812946	0.000538	7.52e-05	4.13901	0.79889	1.59864	GPR88	G protein-coupled receptor 88	Up	GPR88_Up
ILMN_1669802	0.000588	8.31e-05	-4.11191	0.703802	-1.85775	CYP8B1	cytochrome P450 family 8 subfamily B member 1	Down	CYP8B1_Down
ILMN_1772789	0.000608	8.64e-05	4.10138	0.666936	1.03435	FGF21	fibroblast growth factor 21	Up	FGF21_Up
ILMN_1668055	0.000614	8.75e-05	-4.09805	0.655315	-1.29872	SAA4	serum amyloid A4, constitutive	Down	SAA4_Down
ILMN_1754864	0.000624	8.91e-05	-4.0932	0.638375	-1.06505	SLC25A18	solute carrier family 25 member 18	Down	SLC25A18_Down
ILMN_1795190	0.000626	8.93e-05	-4.09242	0.635637	-1.18699	CLDN2	claudin 2	Down	CLDN2_Down
ILMN_2193233	0.000656	9.43e-05	-4.07766	0.584193	-1.01316	MZB1	marginal zone B and B1 cell specific protein	Down	MZB1_Down
ILMN_1664464	0.000667	9.59e-05	-4.07297	0.567857	-1.49376	PTGDS	prostaglandin D2 synthase	Down	PTGDS_Down
ILMN_1753005	0.000718	0.000104	-4.04995	0.487953	-1.07473	RELN	reelin	Down	RELN_Down
ILMN_1671365	0.000723	0.000105	-4.04783	0.480608	-1.32661	PRODH	proline dehydrogenase 1	Down	PRODH_Down
ILMN_1795257	0.000764	0.000112	-4.03066	0.421208	-1.07287	GPT	glutamic--pyruvic transaminase	Down	GPT_Down
ILMN_1747716	0.000765	0.000112	-4.03016	0.419496	-1.06349	ALDOB	aldolase, fructose-bisphosphate B	Down	ALDOB_Down
ILMN_2108735	0.000787	0.000116	4.02113	0.388337	1.88676	EEF1A2	eukaryotic translation elongation factor 1 alpha 2	Up	EEF1A2_Up
ILMN_1680196	0.000844	0.000125	3.99939	0.313548	1.08639	LAPTM4B	lysosomal protein transmembrane 4 beta	Up	LAPTM4B_Up
ILMN_1810752	0.000847	0.000126	-3.99843	0.310238	-1.1838	C4BPA	complement component 4 binding protein alpha	Down	C4BPA_Down
ILMN_1651958	0.000942	0.000142	-3.96413	0.19284	-1.03392	MGP	matrix Gla protein	Down	MGP_Down
ILMN_1761084	0.001	0.000153	-3.94333	0.121975	-1.56769	FNDC5	fibronectin type III domain containing 5	Down	FNDC5_Down
ILMN_1746013	0.00101	0.000154	3.94294	0.120661	1.0766	SPOCK1	sparc/osteonectin, cwcv and kazal-like domains proteoglycan (testican) 1	Up	SPOCK1_Up
ILMN_1708841	0.00117	0.000182	-3.89516	-0.041056	-1.02259	GOLPH3	golgi phosphoprotein 3	Down	GOLPH3_Down
ILMN_1800739	0.00123	0.000195	-3.87606	-0.105317	-1.14027	SPINT2	serine peptidase inhibitor, Kunitz type 2	Down	SPINT2_Down
ILMN_2225537	0.00124	0.000196	-3.87432	-0.11116	-1.06048	PTGR1	prostaglandin reductase 1	Down	PTGR1_Down
ILMN_1838767	0.00128	0.000203	3.86404	-0.145611	1.14638	LINC01451	long intergenic non-protein coding RNA 1451	Up	LINC01451_Up
ILMN_2160209	0.00137	0.000221	-3.84095	-0.222832	-1.19557	EPCAM	epithelial cell adhesion molecule	Down	EPCAM_Down
ILMN_2166457	0.0014	0.000226	-3.83466	-0.243791	-1.253	HPGD	hydroxyprostaglandin dehydrogenase 15-(NAD)	Down	HPGD_Down
ILMN_1744817	0.00141	0.000227	-3.8333	-0.2483	-1.1903	UGT1A1	UDP glucuronosyltransferase family 1 member A1	Down	UGT1A1_Down
ILMN_2233576	0.00145	0.000234	3.82395	-0.279441	1.27569	GAGE12I	G antigen 12I	Up	GAGE12I_Up
ILMN_1760414	0.00157	0.000258	-3.79651	-0.370437	-1.03388	AADAC	arylacetamide deacetylase	Down	AADAC_Down
ILMN_2363586	0.00157	0.000259	-3.79526	-0.374568	-1.01225	SDCBP	syndecan binding protein	Down	SDCBP_Down
ILMN_2168747	0.00175	0.000293	-3.75983	-0.491309	-1.29418	GSTA2	glutathione S-transferase alpha 2	Down	GSTA2_Down
ILMN_1801246	0.00183	0.00031	-3.74398	-0.543252	-1.10934	IFITM1	interferon induced transmembrane protein 1	Down	IFITM1_Down
ILMN_1715169	0.00195	0.000333	-3.7232	-0.611164	-1.09919	HLA-DRB1	major histocompatibility complex, class II, DR beta 1	Down	HLA-DRB1_Down
ILMN_1765605	0.00247	0.00044	-3.64211	-0.873339	-1.16917	APOC4	apolipoprotein C4	Down	APOC4_Down
ILMN_1780575	0.00285	0.00052	-3.59237	-1.03201	-1.72097	CRP	C-reactive protein, pentraxin-related	Down	CRP_Down
ILMN_1796461	0.00319	0.000594	-3.553	-1.15644	-1.08017	PRSS8	protease, serine 8	Down	PRSS8_Down
ILMN_2382679	0.00344	0.00065	3.52606	-1.24096	1.52224	REG3A	regenerating family member 3 alpha	Up	REG3A_Up
ILMN_1706140	0.00371	0.000713	3.49819	-1.32788	1.15037	PAGE2B	PAGE family member 2B	Up	PAGE2B_Up
ILMN_1745356	0.00377	0.000727	-3.49265	-1.34511	-1.03161	CXCL9	C-X-C motif chemokine ligand 9	Down	CXCL9_Down
ILMN_1782754	0.00402	0.000782	3.47063	-1.41333	1.02893	PAGE4	PAGE family member 4	Up	PAGE4_Up
ILMN_1685043	0.00421	0.000827	-3.45353	-1.46608	-1.17926	CYP3A7	cytochrome P450 family 3 subfamily A member 7	Down	CYP3A7_Down
ILMN_1676192	0.00459	0.000917	-3.42215	-1.56235	-1.15628	SLC13A5	solute carrier family 13 member 5	Down	SLC13A5_Down
ILMN_1729075	0.0055	0.00114	3.3552	-1.76545	1.14914	PTH2R	parathyroid hormone 2 receptor	Up	PTH2R_Up
ILMN_2056606	0.00567	0.00118	-3.34335	-1.80105	-1.08054	PPP1R1A	protein phosphatase 1 regulatory inhibitor subunit 1A	Down	PPP1R1A_Down
ILMN_1702503	0.00579	0.00121	3.33535	-1.82505	1.29687	ALDH3A1	aldehyde dehydrogenase 3 family member A1	Up	ALDH3A1_Up
ILMN_1724213	0.00871	0.00201	3.17706	-2.29031	1.01725	PAGE2	PAGE family member 2	Up	PAGE2_Up
ILMN_1802167	0.00969	0.00228	-3.13516	-2.41041	-1.13453	ALDH1L1	aldehyde dehydrogenase 1 family member L1	Down	ALDH1L1_Down
ILMN_1651354	0.0156	0.0042	2.93293	-2.97169	1.34866	SPP1	secreted phosphoprotein 1	Up	SPP1_Up
ILMN_2219683	0.0247	0.00757	-2.72857	-3.50704	-1.06358	NEU4	neuraminidase 4	Down	NEU4_Down
