# Supplementary material for: Centromere protein N may be a novel malignant prognostic biomarker for hepatocellular carcinoma
Source: PeerJ. 2021 May 3;9:e11342. doi: 10.7717/peerj.11342 (PMC8101454; doi:10.7717/peerj.11342)
Supplement: File S2 [file peerj-09-11342-s012.xlsx]

## Sheet: Sheet1
ID	adj.P.Val	P.Value	t	B	logFC	Gene.symbol	Gene.title	Disease	Label
216058_s_at	2.09e-44	3.83e-49	-19.8972	99.8052	-3.98449	CYP2C19	cytochrome P450 family 2 subfamily C member 19	Down	CYP2C19_Down
207995_s_at	1.44e-43	5.29e-48	-19.5042	97.2831	-3.60726	CLEC4M	C-type lectin domain family 4 member M	Down	CLEC4M_Down
1559065_a_at	2.12e-31	1.55e-35	-15.3408	69.5585	-3.96072	CLEC4G	C-type lectin domain family 4 member G	Down	CLEC4G_Down
1559577_at	8.76e-31	8.02e-35	-15.1079	67.9662	-2.04546	FCN2	ficolin 2	Down	FCN2_Down
212554_at	3.23e-30	4.14e-34	14.8753	66.3735	3.55216	CAP2	CAP, adenylate cyclase-associated protein, 2 (yeast)	Up	CAP2_Up
207330_at	7.45e-28	1.23e-31	-14.0704	60.8471	-3.37125	PZP	PZP, alpha-2-macroglobulin like	Down	PZP_Down
220116_at	2.42e-27	4.42e-31	-13.8892	59.6017	-4.28917	KCNN2	potassium calcium-activated channel subfamily N member 2	Down	KCNN2_Down
220496_at	3.09e-27	6.22e-31	-13.8409	59.2696	-3.92548	CLEC1B	C-type lectin domain family 1 member B	Down	CLEC1B_Down
1559573_at	9.61e-26	2.11e-29	-13.3426	55.8432	-5.3751	LINC01093	long intergenic non-protein coding RNA 1093	Down	LINC01093_Down
220114_s_at	1.65e-25	3.92e-29	-13.2552	55.2418	-1.87845	STAB2	stabilin 2	Down	STAB2_Down
222484_s_at	9.4e-25	2.41e-28	-12.9981	53.4756	-4.45707	CXCL14	C-X-C motif chemokine ligand 14	Down	CXCL14_Down
209365_s_at	1.88e-24	5.16e-28	-12.8901	52.7342	-2.37063	ECM1	extracellular matrix protein 1	Down	ECM1_Down
1570228_at	2.04e-23	5.97e-27	-12.5428	50.3531	-2.47962	CFHR3	complement factor H related 3	Down	CFHR3_Down
210233_at	2.59e-23	8.06e-27	-12.5	50.0601	-4.11426	IL1RAP	interleukin 1 receptor accessory protein	Down	IL1RAP_Down
230425_at	2.62e-23	8.65e-27	-12.4901	49.9921	-2.02897	EPHB1	EPH receptor B1	Down	EPHB1_Down
1553722_s_at	2.71e-23	9.44e-27	-12.4777	49.9072	-1.46259	RNF152	ring finger protein 152	Down	RNF152_Down
202768_at	2.87e-23	1.05e-26	-12.4623	49.8022	-3.7311	FOSB	FosB proto-oncogene, AP-1 transcription factor subunit	Down	FOSB_Down
1557225_at	4.6e-23	1.77e-26	-12.3885	49.2968	-1.58725	ASPG	asparaginase	Down	ASPG_Down
236576_at	3.43e-21	1.63e-24	-11.7421	44.8899	-1.79411	CTNNA3	catenin alpha 3	Down	CTNNA3_Down
230478_at	1.43e-20	7.31e-24	-11.527	43.431	-3.83563	OIT3	oncoprotein induced transcript 3	Down	OIT3_Down
215712_s_at	3.98e-20	2.13e-23	-11.3732	42.3907	-2.44287	IGFALS	insulin like growth factor binding protein acid labile subunit	Down	IGFALS_Down
204159_at	3.98e-20	2.19e-23	11.3691	42.3635	2.81755	CDKN2C	cyclin dependent kinase inhibitor 2C	Up	CDKN2C_Up
202963_at	5.88e-20	3.34e-23	11.3081	41.9514	2.26875	RFX5	regulatory factor X5	Up	RFX5_Up
218039_at	1.18e-19	6.94e-23	11.2025	41.2398	3.20433	NUSAP1	nucleolar and spindle associated protein 1	Up	NUSAP1_Up
205984_at	2.45e-19	1.48e-22	-11.0927	40.501	-3.91631	CRHBP	corticotropin releasing hormone binding protein	Down	CRHBP_Down
222077_s_at	2.83e-19	1.76e-22	11.0674	40.3316	3.12612	RACGAP1	Rac GTPase activating protein 1	Up	RACGAP1_Up
205911_at	2.9e-19	1.86e-22	-11.0596	40.2789	-1.04123	PTH1R	parathyroid hormone 1 receptor	Down	PTH1R_Down
223699_at	4.63e-19	3.05e-22	-10.9877	39.7967	-4.83495	CNDP1	carnosine dipeptidase 1	Down	CNDP1_Down
211492_s_at	7.25e-19	4.91e-22	-10.9186	39.3335	-1.30762	ADRA1A	adrenoceptor alpha 1A	Down	ADRA1A_Down
201841_s_at	1.32e-18	9.41e-22	10.8239	38.7003	2.02531	HSPB1	heat shock protein family B (small) member 1	Up	HSPB1_Up
1568765_at	2.9e-18	2.12e-21	-10.7053	37.9087	-3.30299	SERPINE1	serpin family E member 1	Down	SERPINE1_Down
230135_at	3.57e-18	2.68e-21	-10.6711	37.6806	-2.65722	HHIP	hedgehog interacting protein	Down	HHIP_Down
206732_at	4.12e-18	3.17e-21	-10.6465	37.5171	-1.90713	SLITRK3	SLIT and NTRK like family member 3	Down	SLITRK3_Down
232072_at	6.22e-18	4.9e-21	-10.5828	37.0935	-1.08632	NAAA	N-acylethanolamine acid amidase	Down	NAAA_Down
207526_s_at	1.22e-17	9.87e-21	-10.48	36.4114	-1.51612	IL1RL1	interleukin 1 receptor like 1	Down	IL1RL1_Down
225557_at	2.15e-17	1.87e-20	-10.3861	35.7895	-1.99455	CSRNP1	cysteine and serine rich nuclear protein 1	Down	CSRNP1_Down
228323_at	2.47e-17	2.22e-20	10.3609	35.6233	2.55987	KNL1	kinetochore scaffold 1	Up	KNL1_Up
205866_at	3.07e-17	2.81e-20	-10.3257	35.3905	-4.02563	FCN3	ficolin 3	Down	FCN3_Down
229567_at	3.27e-17	3.11e-20	-10.3108	35.2925	-1.25127	FITM1	fat storage inducing transmembrane protein 1	Down	FITM1_Down
205819_at	3.97e-17	3.85e-20	-10.2794	35.0856	-2.28567	MARCO	macrophage receptor with collagenous structure	Down	MARCO_Down
204301_at	3.97e-17	3.93e-20	-10.2764	35.0656	-2.76352	KBTBD11	kelch repeat and BTB domain containing 11	Down	KBTBD11_Down
205019_s_at	4.02e-17	4.04e-20	-10.2721	35.0374	-1.48323	VIPR1	vasoactive intestinal peptide receptor 1	Down	VIPR1_Down
206424_at	4.02e-17	4.12e-20	-10.2694	35.0193	-3.18651	CYP26A1	cytochrome P450 family 26 subfamily A member 1	Down	CYP26A1_Down
217133_x_at	7.22e-17	7.66e-20	-10.1775	34.415	-2.36206	CYP2B6	cytochrome P450 family 2 subfamily B member 6	Down	CYP2B6_Down
221529_s_at	1.42e-16	1.55e-19	10.0726	33.7266	2.25517	PLVAP	plasmalemma vesicle associated protein	Up	PLVAP_Up
1569203_at	1.42e-16	1.56e-19	-10.0717	33.7205	-2.21719	CXCL2	C-X-C motif chemokine ligand 2	Down	CXCL2_Down
1553296_at	1.74e-16	1.95e-19	-10.0392	33.5079	-2.7224	ADGRG7	adhesion G protein-coupled receptor G7	Down	ADGRG7_Down
209268_at	1.98e-16	2.25e-19	10.0177	33.3668	1.60905	VPS45	vacuolar protein sorting 45 homolog	Up	VPS45_Up
223593_at	1.99e-16	2.29e-19	-10.0147	33.3475	-2.34762	AADAT	aminoadipate aminotransferase	Down	AADAT_Down
1563658_a_at	4.84e-16	5.77e-19	-9.87713	32.4498	-1.21225	SYT9	synaptotagmin 9	Down	SYT9_Down
1553513_at	6.02e-16	7.27e-19	-9.84237	32.2236	-1.07586	VNN3	vanin 3	Down	VNN3_Down
203213_at	6.03e-16	7.4e-19	9.83984	32.2071	3.3908	CDK1	cyclin dependent kinase 1	Up	CDK1_Up
219918_s_at	8.85e-16	1.13e-18	9.77579	31.7911	3.9643	ASPM	abnormal spindle microtubule assembly	Up	ASPM_Up
219059_s_at	9.94e-16	1.29e-18	-9.75619	31.664	-2.3128	LYVE1	lymphatic vessel endothelial hyaluronan receptor 1	Down	LYVE1_Down
209773_s_at	1.11e-15	1.46e-18	9.73791	31.5454	3.42985	RRM2	ribonucleotide reductase regulatory subunit M2	Up	RRM2_Up
200855_at	1.31e-15	1.75e-18	-9.71037	31.3671	-1.32028	NCOR1	nuclear receptor corepressor 1	Down	NCOR1_Down
204026_s_at	1.65e-15	2.32e-18	9.66846	31.096	2.90272	ZWINT	ZW10 interacting kinetochore protein	Up	ZWINT_Up
209470_s_at	2e-15	2.87e-18	-9.63626	30.8879	-2.49737	GPM6A	glycoprotein M6A	Down	GPM6A_Down
233645_s_at	2e-15	2.89e-18	-9.63491	30.8793	-1.23432	C1RL	complement C1r subcomponent like	Down	C1RL_Down
207584_at	2.19e-15	3.23e-18	-9.61844	30.7729	-3.63706	LPA	lipoprotein(a)	Down	LPA_Down
205890_s_at	2.19e-15	3.28e-18	9.61579	30.7558	3.84551	UBD///GABBR1	ubiquitin D///gamma-aminobutyric acid type B receptor subunit 1	Up	UBD///GABBR1_Up
202670_at	2.31e-15	3.5e-18	-9.60602	30.6928	-1.37161	MAP2K1	mitogen-activated protein kinase kinase 1	Down	MAP2K1_Down
218585_s_at	2.68e-15	4.17e-18	9.57972	30.5233	3.32984	DTL	denticleless E3 ubiquitin protein ligase homolog	Up	DTL_Up
39249_at	3.37e-15	5.43e-18	-9.53969	30.2655	-1.25629	AQP3	aquaporin 3 (Gill blood group)	Down	AQP3_Down
218252_at	3.42e-15	5.59e-18	9.53546	30.2383	2.31098	CKAP2	cytoskeleton associated protein 2	Up	CKAP2_Up
210909_x_at	3.42e-15	5.64e-18	-9.53419	30.2301	-1.66051	LPAL2	lipoprotein(a) like 2, pseudogene	Down	LPAL2_Down
207609_s_at	3.66e-15	6.1e-18	-9.52231	30.1537	-3.84344	CYP1A2	cytochrome P450 family 1 subfamily A member 2	Down	CYP1A2_Down
225068_at	4.44e-15	7.72e-18	9.48647	29.9234	1.36725	KLHL12	kelch like family member 12	Up	KLHL12_Up
201451_x_at	4.47e-15	7.86e-18	-9.48372	29.9058	-1.43525	RHEB	Ras homolog enriched in brain	Down	RHEB_Down
220112_at	4.73e-15	8.48e-18	-9.47228	29.8324	-1.02186	ANKRD55	ankyrin repeat domain 55	Down	ANKRD55_Down
207165_at	4.78e-15	8.76e-18	9.46738	29.8009	3.11502	HMMR	hyaluronan mediated motility receptor	Up	HMMR_Up
206251_s_at	4.83e-15	8.92e-18	-9.46452	29.7826	-1.62348	AVPR1A	arginine vasopressin receptor 1A	Down	AVPR1A_Down
220070_at	6.94e-15	1.33e-17	-9.40341	29.391	-1.88181	KDM8	lysine demethylase 8	Down	KDM8_Down
207420_at	7.48e-15	1.45e-17	-9.39055	29.3087	-1.55187	COLEC10	collectin subfamily member 10	Down	COLEC10_Down
211610_at	7.66e-15	1.5e-17	-9.38545	29.2761	-1.20654	KLF6	Kruppel like factor 6	Down	KLF6_Down
209787_s_at	9.18e-15	1.82e-17	9.35647	29.0908	1.36096	HMGN4	high mobility group nucleosomal binding domain 4	Up	HMGN4_Up
204289_at	1.05e-14	2.09e-17	-9.33495	28.9534	-2.18293	ALDH6A1	aldehyde dehydrogenase 6 family member A1	Down	ALDH6A1_Down
225401_at	1.13e-14	2.27e-17	9.32219	28.872	1.83337	GLMP	glycosylated lysosomal membrane protein	Up	GLMP_Up
208079_s_at	1.76e-14	3.68e-17	9.24849	28.4026	2.8837	AURKA	aurora kinase A	Up	AURKA_Up
232449_at	1.78e-14	3.75e-17	-9.24576	28.3852	-3.4706	BCO2	beta-carotene oxygenase 2	Down	BCO2_Down
230707_at	2.06e-14	4.37e-17	-9.22229	28.236	-2.64785	SORL1	sortilin related receptor 1	Down	SORL1_Down
206030_at	2.71e-14	5.8e-17	-9.17882	27.9601	-2.62519	ASPA	aspartoacylase	Down	ASPA_Down
220346_at	2.89e-14	6.24e-17	-9.16759	27.8889	-1.42177	MTHFD2L	methylenetetrahydrofolate dehydrogenase (NADP+ dependent) 2-like	Down	MTHFD2L_Down
218883_s_at	2.94e-14	6.42e-17	9.16345	27.8627	2.97423	CENPU	centromere protein U	Up	CENPU_Up
201714_at	3.19e-14	7.02e-17	9.14962	27.775	1.71838	TUBG1	tubulin gamma 1	Up	TUBG1_Up
220367_s_at	3.5e-14	7.74e-17	9.13451	27.6794	1.12511	SAP130	Sin3A associated protein 130	Up	SAP130_Up
222593_s_at	3.55e-14	7.94e-17	9.13067	27.6551	1.81167	SPATS2	spermatogenesis associated serine rich 2	Up	SPATS2_Up
200788_s_at	3.69e-14	8.32e-17	9.12357	27.6101	1.4467	PEA15	phosphoprotein enriched in astrocytes 15	Up	PEA15_Up
222433_at	3.85e-14	8.81e-17	9.11462	27.5535	2.52611	ENAH	enabled homolog (Drosophila)	Up	ENAH_Up
237350_at	4.12e-14	9.65e-17	-9.10072	27.4657	-3.65216	TTC36	tetratricopeptide repeat domain 36	Down	TTC36_Down
1553984_s_at	4.92e-14	1.18e-16	9.06959	27.2691	1.60147	DTYMK	deoxythymidylate kinase	Up	DTYMK_Up
202503_s_at	5.46e-14	1.33e-16	9.0514	27.1543	2.95809	KIAA0101	KIAA0101	Up	KIAA0101_Up
223844_at	7.54e-14	1.85e-16	-9.00031	26.8325	-1.14701	ADAMTS13	ADAM metallopeptidase with thrombospondin type 1 motif 13	Down	ADAMTS13_Down
200882_s_at	1.06e-13	2.64e-16	8.94523	26.4864	1.40478	PSMD4	proteasome 26S subunit, non-ATPase 4	Up	PSMD4_Up
201128_s_at	1.06e-13	2.65e-16	8.94465	26.4827	1.58678	ACLY	ATP citrate lyase	Up	ACLY_Up
210077_s_at	1.32e-13	3.35e-16	-8.90823	26.2543	-1.10789	SRSF5	serine and arginine rich splicing factor 5	Down	SRSF5_Down
224486_s_at	1.35e-13	3.47e-16	8.90275	26.22	1.04184	C15orf41	chromosome 15 open reading frame 41	Up	C15orf41_Up
235102_x_at	1.41e-13	3.64e-16	-8.89542	26.1741	-1.45739	SNORD3D///SNORD3C///SNORD3B-2///SNORD3A///SNORD3B-1	small nucleolar RNA, C/D box 3D///small nucleolar RNA, C/D box 3C///small nucleolar RNA, C/D box 3B-2///small nucleolar RNA, C/D box 3A///small nucleolar RNA, C/D box 3B-1	Down	SNORD3D///SNORD3C///SNORD3B-2///SNORD3A///SNORD3B-1_Down
204428_s_at	1.45e-13	3.77e-16	-8.88997	26.14	-3.35936	LCAT	lecithin-cholesterol acyltransferase	Down	LCAT_Down
206380_s_at	1.45e-13	3.81e-16	-8.88833	26.1297	-1.7938	CFP	complement factor properdin	Down	CFP_Down
211980_at	1.57e-13	4.13e-16	8.87575	26.051	2.29051	COL4A1	collagen type IV alpha 1 chain	Up	COL4A1_Up
204762_s_at	1.64e-13	4.37e-16	-8.86709	25.9968	-1.05222	GNAO1	G protein subunit alpha o1	Down	GNAO1_Down
213629_x_at	1.68e-13	4.49e-16	-8.86285	25.9703	-3.77094	MT1F	metallothionein 1F	Down	MT1F_Down
220107_s_at	1.74e-13	4.68e-16	-8.85636	25.9297	-1.16808	ZC2HC1C	zinc finger C2HC-type containing 1C	Down	ZC2HC1C_Down
212051_at	1.81e-13	4.93e-16	8.84807	25.8779	1.19535	WIPF2	WAS/WASL interacting protein family member 2	Up	WIPF2_Up
202261_at	2.23e-13	6.2e-16	8.81239	25.6552	1.23535	VPS72	vacuolar protein sorting 72 homolog	Up	VPS72_Up
218009_s_at	2.23e-13	6.21e-16	8.81208	25.6533	2.89571	PRC1	protein regulator of cytokinesis 1	Up	PRC1_Up
221685_s_at	2.54e-13	7.12e-16	8.79088	25.5211	1.67106	SPDL1	spindle apparatus coiled-coil protein 1	Up	SPDL1_Up
202326_at	2.71e-13	7.65e-16	8.77969	25.4514	1.404	EHMT2	euchromatic histone lysine methyltransferase 2	Up	EHMT2_Up
205249_at	3.04e-13	8.62e-16	-8.76089	25.3344	-2.20704	EGR2	early growth response 2	Down	EGR2_Down
206102_at	3.3e-13	9.42e-16	8.74706	25.2484	2.98707	GINS1	GINS complex subunit 1	Up	GINS1_Up
228191_at	3.36e-13	9.65e-16	8.74338	25.2256	2.34746	FLVCR1	feline leukemia virus subgroup C cellular receptor 1	Up	FLVCR1_Up
225585_at	3.45e-13	9.99e-16	8.73782	25.191	1.86817	RAP2A	RAP2A, member of RAS oncogene family	Up	RAP2A_Up
226059_at	3.56e-13	1.04e-15	8.73104	25.1488	1.93013	TOMM40L	translocase of outer mitochondrial membrane 40 like	Up	TOMM40L_Up
227771_at	3.56e-13	1.05e-15	-8.73011	25.1431	-1.87147	LIFR	leukemia inhibitory factor receptor alpha	Down	LIFR_Down
225687_at	3.63e-13	1.08e-15	8.72533	25.1134	2.80832	FAM83D	family with sequence similarity 83 member D	Up	FAM83D_Up
203162_s_at	3.79e-13	1.14e-15	8.71758	25.0653	1.0836	KATNB1	katanin regulatory subunit B1	Up	KATNB1_Up
204162_at	3.84e-13	1.17e-15	8.71361	25.0406	3.00096	NDC80	NDC80, kinetochore complex component	Up	NDC80_Up
226287_at	3.89e-13	1.19e-15	8.71068	25.0224	2.07371	CCDC34	coiled-coil domain containing 34	Up	CCDC34_Up
227109_at	3.89e-13	1.2e-15	8.70951	25.0152	1.31057	CYP2R1	cytochrome P450 family 2 subfamily R member 1	Up	CYP2R1_Up
215253_s_at	4.06e-13	1.26e-15	-8.70205	24.9689	-1.91644	RCAN1	regulator of calcineurin 1	Down	RCAN1_Down
210589_s_at	4.77e-13	1.49e-15	8.67498	24.8011	1.59193	GBAP1	glucosylceramidase beta pseudogene 1	Up	GBAP1_Up
218350_s_at	5.14e-13	1.63e-15	8.6614	24.717	2.28018	GMNN	geminin, DNA replication inhibitor	Up	GMNN_Up
1558603_at	5.23e-13	1.67e-15	-8.65756	24.6932	-2.32636	PLGLB2	plasminogen-like B2	Down	PLGLB2_Down
209160_at	5.29e-13	1.7e-15	8.65487	24.6766	1.80374	AKR1C3	aldo-keto reductase family 1, member C3	Up	AKR1C3_Up
212659_s_at	5.7e-13	1.84e-15	-8.64221	24.5983	-1.51592	IL1RN	interleukin 1 receptor antagonist	Down	IL1RN_Down
220491_at	5.94e-13	1.95e-15	-8.63319	24.5425	-5.14738	HAMP	hepcidin antimicrobial peptide	Down	HAMP_Down
201930_at	6.46e-13	2.13e-15	8.61901	24.4549	2.11374	MCM6	minichromosome maintenance complex component 6	Up	MCM6_Up
213194_at	6.77e-13	2.24e-15	8.61092	24.4049	3.82043	ROBO1	roundabout guidance receptor 1	Up	ROBO1_Up
57163_at	6.81e-13	2.27e-15	8.60894	24.3927	1.16358	MIR6734///ELOVL1	microRNA 6734///ELOVL fatty acid elongase 1	Up	MIR6734///ELOVL1_Up
201656_at	7.04e-13	2.36e-15	8.60304	24.3563	1.73018	ITGA6	integrin subunit alpha 6	Up	ITGA6_Up
214710_s_at	7.23e-13	2.44e-15	8.59788	24.3245	3.03455	CCNB1	cyclin B1	Up	CCNB1_Up
219787_s_at	7.32e-13	2.48e-15	8.59517	24.3077	2.65603	ECT2	epithelial cell transforming 2	Up	ECT2_Up
202366_at	8.65e-13	2.96e-15	-8.5671	24.1347	-1.37894	ACADS	acyl-CoA dehydrogenase, C-2 to C-3 short chain	Down	ACADS_Down
214220_s_at	9.4e-13	3.24e-15	8.55304	24.0481	1.18545	ALMS1	ALMS1, centrosome and basal body associated protein	Up	ALMS1_Up
205449_at	9.53e-13	3.32e-15	8.54927	24.0249	1.49633	SAC3D1	SAC3 domain containing 1	Up	SAC3D1_Up
203477_at	1.01e-12	3.52e-15	8.53985	23.967	3.64886	COL15A1	collagen type XV alpha 1 chain	Up	COL15A1_Up
229538_s_at	1.04e-12	3.66e-15	8.53369	23.929	2.07169	IQGAP3	IQ motif containing GTPase activating protein 3	Up	IQGAP3_Up
201584_s_at	1.07e-12	3.77e-15	8.5289	23.8996	1.55579	DDX39A	DEAD-box helicase 39A	Up	DDX39A_Up
217946_s_at	1.16e-12	4.17e-15	8.51312	23.8026	1.44514	SAE1	SUMO1 activating enzyme subunit 1	Up	SAE1_Up
212737_at	1.18e-12	4.28e-15	8.50897	23.7771	1.34689	GM2A	GM2 ganglioside activator	Up	GM2A_Up
218968_s_at	1.18e-12	4.29e-15	8.50853	23.7744	1.06382	ZFP64	ZFP64 zinc finger protein	Up	ZFP64_Up
212724_at	1.29e-12	4.76e-15	-8.49191	23.6724	-2.32286	RND3	Rho family GTPase 3	Down	RND3_Down
200783_s_at	1.5e-12	5.61e-15	8.46596	23.5133	1.83583	STMN1	stathmin 1	Up	STMN1_Up
226936_at	1.76e-12	6.6e-15	8.44018	23.3555	2.33753	CENPW	centromere protein W	Up	CENPW_Up
205913_at	1.8e-12	6.77e-15	-8.43605	23.3302	-2.05768	PLIN1	perilipin 1	Down	PLIN1_Down
223538_at	2.01e-12	7.69e-15	8.41596	23.2074	1.6218	SERF1B///SERF1A	small EDRK-rich factor 1B///small EDRK-rich factor 1A	Up	SERF1B///SERF1A_Up
209714_s_at	2.24e-12	8.65e-15	8.39716	23.0925	2.79922	CDKN3	cyclin dependent kinase inhibitor 3	Up	CDKN3_Up
223229_at	2.36e-12	9.19e-15	8.38751	23.0337	2.39457	UBE2T	ubiquitin conjugating enzyme E2 T	Up	UBE2T_Up
228273_at	2.4e-12	9.39e-15	8.38402	23.0124	2.87549	PRR11	proline rich 11	Up	PRR11_Up
217546_at	2.42e-12	9.52e-15	-8.38182	22.999	-5.07405	MT1M	metallothionein 1M	Down	MT1M_Down
202705_at	2.66e-12	1.07e-14	8.36392	22.8898	2.52017	CCNB2	cyclin B2	Up	CCNB2_Up
203022_at	2.75e-12	1.11e-14	8.35719	22.8489	1.71484	RNASEH2A	ribonuclease H2 subunit A	Up	RNASEH2A_Up
209189_at	2.75e-12	1.11e-14	-8.3569	22.8471	-3.31472	FOS	Fos proto-oncogene, AP-1 transcription factor subunit	Down	FOS_Down
215014_at	3.21e-12	1.32e-14	-8.32949	22.6803	-3.16233	KCND3	potassium voltage-gated channel subfamily D member 3	Down	KCND3_Down
217286_s_at	3.26e-12	1.36e-14	8.32461	22.6506	1.12684	NDRG3	NDRG family member 3	Up	NDRG3_Up
231140_at	3.26e-12	1.37e-14	-8.32413	22.6477	-1.40825	TPPP2	tubulin polymerization promoting protein family member 2	Down	TPPP2_Down
211964_at	3.52e-12	1.51e-14	8.3079	22.5491	2.27025	COL4A2	collagen type IV alpha 2 chain	Up	COL4A2_Up
225300_at	3.55e-12	1.54e-14	8.30511	22.5321	1.25143	KNSTRN	kinetochore localized astrin/SPAG5 binding protein	Up	KNSTRN_Up
202185_at	3.73e-12	1.63e-14	8.29642	22.4794	1.12878	PLOD3	procollagen-lysine,2-oxoglutarate 5-dioxygenase 3	Up	PLOD3_Up
1568638_a_at	3.99e-12	1.75e-14	-8.28477	22.4087	-2.40112	IDO2	indoleamine 2,3-dioxygenase 2	Down	IDO2_Down
211231_x_at	4.24e-12	1.86e-14	-8.2744	22.3458	-2.7185	CYP4A11	cytochrome P450 family 4 subfamily A member 11	Down	CYP4A11_Down
205773_at	4.34e-12	1.91e-14	-8.27019	22.3203	-2.1271	CPEB3	cytoplasmic polyadenylation element binding protein 3	Down	CPEB3_Down
227654_at	4.88e-12	2.18e-14	-8.24938	22.1942	-1.51151	FAM65C	family with sequence similarity 65 member C	Down	FAM65C_Down
201292_at	4.94e-12	2.21e-14	8.24685	22.1789	3.19667	TOP2A	topoisomerase (DNA) II alpha	Up	TOP2A_Up
214830_at	5.16e-12	2.32e-14	8.23905	22.1317	1.91347	SLC38A6	solute carrier family 38 member 6	Up	SLC38A6_Up
1561336_at	5.58e-12	2.54e-14	-8.22456	22.0441	-1.19974	DNASE1L3	deoxyribonuclease 1 like 3	Down	DNASE1L3_Down
214906_x_at	5.7e-12	2.62e-14	-8.2198	22.0153	-1.42106	N4BP2L1	NEDD4 binding protein 2 like 1	Down	N4BP2L1_Down
227679_at	5.83e-12	2.69e-14	8.21562	21.9901	1.42659	HDAC11	histone deacetylase 11	Up	HDAC11_Up
226181_at	5.83e-12	2.7e-14	-8.21504	21.9866	-2.09332	TUBE1	tubulin epsilon 1	Down	TUBE1_Down
201485_s_at	6.15e-12	2.88e-14	8.20454	21.9232	1.45292	RCN2	reticulocalbin 2	Up	RCN2_Up
218253_s_at	6.59e-12	3.1e-14	8.19258	21.851	1.07079	EIF2D	eukaryotic translation initiation factor 2D	Up	EIF2D_Up
201578_at	6.72e-12	3.18e-14	8.18884	21.8285	2.00798	PODXL	podocalyxin like	Up	PODXL_Up
223461_at	7.19e-12	3.43e-14	8.17635	21.7531	1.40888	TBC1D7	TBC1 domain family member 7	Up	TBC1D7_Up
220186_s_at	7.29e-12	3.54e-14	-8.17118	21.722	-1.91005	CDHR2	cadherin related family member 2	Down	CDHR2_Down
223426_s_at	7.29e-12	3.56e-14	-8.17051	21.718	-1.43477	EPB41L4B	erythrocyte membrane protein band 4.1 like 4B	Down	EPB41L4B_Down
223784_at	7.29e-12	3.58e-14	-8.16965	21.7127	-3.68511	TMEM27	transmembrane protein 27	Down	TMEM27_Down
204788_s_at	7.49e-12	3.69e-14	8.16476	21.6833	1.0905	PPOX	protoporphyrinogen oxidase	Up	PPOX_Up
213043_s_at	7.72e-12	3.82e-14	8.15922	21.65	1.10238	MIR6884///MED24	microRNA 6884///mediator complex subunit 24	Up	MIR6884///MED24_Up
201956_s_at	8.26e-12	4.1e-14	8.14775	21.5809	1.24495	GNPAT	glyceronephosphate O-acyltransferase	Up	GNPAT_Up
206359_at	8.48e-12	4.24e-14	-8.14221	21.5476	-1.09271	SOCS3	suppressor of cytokine signaling 3	Down	SOCS3_Down
203554_x_at	8.52e-12	4.27e-14	8.14096	21.5401	2.22122	PTTG1	pituitary tumor-transforming 1	Up	PTTG1_Up
204478_s_at	9.31e-12	4.69e-14	8.12607	21.4505	1.08727	RABIF	RAB interacting factor	Up	RABIF_Up
223967_at	1.02e-11	5.23e-14	-8.10845	21.3447	-1.50753	ANGPTL6	angiopoietin like 6	Down	ANGPTL6_Down
207828_s_at	1.1e-11	5.69e-14	8.09475	21.2625	2.5019	CENPF	centromere protein F	Up	CENPF_Up
201377_at	1.25e-11	6.65e-14	8.06938	21.1105	1.53918	UBAP2L	ubiquitin associated protein 2 like	Up	UBAP2L_Up
217978_s_at	1.25e-11	6.66e-14	8.06917	21.1092	1.15672	UBE2Q1	ubiquitin conjugating enzyme E2 Q1	Up	UBE2Q1_Up
228186_s_at	1.25e-11	6.72e-14	-8.06756	21.0996	-2.10571	RSPO3	R-spondin 3	Down	RSPO3_Down
209132_s_at	1.57e-11	8.48e-14	8.02985	20.8741	1.06858	COMMD4	COMM domain containing 4	Up	COMMD4_Up
226370_at	1.71e-11	9.32e-14	-8.01455	20.7827	-1.47516	KLHL15	kelch like family member 15	Down	KLHL15_Down
222843_at	1.93e-11	1.06e-13	7.99355	20.6574	1.88659	FIGNL1	fidgetin like 1	Up	FIGNL1_Up
204641_at	1.94e-11	1.07e-13	7.99196	20.648	2.77783	NEK2	NIMA related kinase 2	Up	NEK2_Up
209836_x_at	2e-11	1.11e-13	7.98658	20.6159	1.57474	BOLA2B///BOLA2	bolA family member 2B///bolA family member 2	Up	BOLA2B///BOLA2_Up
1560469_at	2.03e-11	1.13e-13	-7.98379	20.5993	-2.29504	NR5A2	nuclear receptor subfamily 5 group A member 2	Down	NR5A2_Down
50374_at	2.15e-11	1.2e-13	7.97383	20.54	1.11416	OXLD1	oxidoreductase like domain containing 1	Up	OXLD1_Up
212799_at	2.19e-11	1.23e-13	7.9699	20.5166	1.20792	STX6	syntaxin 6	Up	STX6_Up
214146_s_at	2.2e-11	1.24e-13	-7.96825	20.5068	-1.50877	PPBP	pro-platelet basic protein	Down	PPBP_Down
209093_s_at	2.27e-11	1.29e-13	7.96193	20.4692	1.42226	GBAP1///GBA	glucosylceramidase beta pseudogene 1///glucosylceramidase beta	Up	GBAP1///GBA_Up
224746_at	2.29e-11	1.31e-13	7.95963	20.4555	1.16942	KIAA1522	KIAA1522	Up	KIAA1522_Up
213632_at	2.31e-11	1.32e-13	-7.95762	20.4435	-1.97369	DHODH	dihydroorotate dehydrogenase (quinone)	Down	DHODH_Down
205176_s_at	2.39e-11	1.37e-13	7.95139	20.4065	1.51337	ITGB3BP	integrin subunit beta 3 binding protein	Up	ITGB3BP_Up
228680_at	2.39e-11	1.38e-13	7.95056	20.4016	1.04793	KIF3A	kinesin family member 3A	Up	KIF3A_Up
201590_x_at	2.51e-11	1.46e-13	7.94148	20.3476	1.76722	ANXA2	annexin A2	Up	ANXA2_Up
222116_s_at	2.51e-11	1.46e-13	7.94122	20.3461	1.65746	TBC1D16	TBC1 domain family member 16	Up	TBC1D16_Up
204146_at	2.53e-11	1.48e-13	7.93939	20.3352	2.19071	RAD51AP1	RAD51 associated protein 1	Up	RAD51AP1_Up
201764_at	2.73e-11	1.63e-13	7.92364	20.2417	1.60055	TMEM106C	transmembrane protein 106C	Up	TMEM106C_Up
205440_s_at	2.81e-11	1.68e-13	-7.9181	20.2088	-1.9743	NPY1R	neuropeptide Y receptor Y1	Down	NPY1R_Down
213241_at	2.83e-11	1.71e-13	7.9157	20.1946	2.86434	PLXNC1	plexin C1	Up	PLXNC1_Up
222581_at	2.87e-11	1.74e-13	7.91304	20.1788	1.40706	XPR1	xenotropic and polytropic retrovirus receptor 1	Up	XPR1_Up
202846_s_at	2.91e-11	1.76e-13	7.91066	20.1647	1.21685	PIGC	phosphatidylinositol glycan anchor biosynthesis class C	Up	PIGC_Up
205863_at	2.97e-11	1.8e-13	-7.90669	20.1412	-1.07712	S100A12	S100 calcium binding protein A12	Down	S100A12_Down
213175_s_at	3.38e-11	2.07e-13	7.88427	20.0084	1.35734	SNRPB	small nuclear ribonucleoprotein polypeptides B and B1	Up	SNRPB_Up
223530_at	3.43e-11	2.11e-13	7.88134	19.991	1.8559	TDRKH	tudor and KH domain containing	Up	TDRKH_Up
202758_s_at	3.57e-11	2.19e-13	7.87461	19.9512	1.24292	RFXANK	regulatory factor X associated ankyrin containing protein	Up	RFXANK_Up
213616_at	3.57e-11	2.2e-13	7.87398	19.9475	1.54945	TPGS2	tubulin polyglutamylase complex subunit 2	Up	TPGS2_Up
203362_s_at	3.64e-11	2.26e-13	7.87007	19.9244	2.67831	MAD2L1	MAD2 mitotic arrest deficient-like 1 (yeast)	Up	MAD2L1_Up
225316_at	3.64e-11	2.26e-13	-7.86973	19.9224	-3.23356	MFSD2A	major facilitator superfamily domain containing 2A	Down	MFSD2A_Down
228469_at	4.34e-11	2.74e-13	-7.83796	19.7347	-2.03072	PPID	peptidylprolyl isomerase D	Down	PPID_Down
1555122_at	4.76e-11	3.06e-13	-7.81976	19.6274	-1.12094	ADGRA3	adhesion G protein-coupled receptor A3	Down	ADGRA3_Down
228920_at	4.96e-11	3.21e-13	7.81219	19.5828	1.32139	ZNF260	zinc finger protein 260	Up	ZNF260_Up
226409_at	5.13e-11	3.33e-13	7.80578	19.545	1.00689	TBC1D20	TBC1 domain family member 20	Up	TBC1D20_Up
204825_at	5.2e-11	3.39e-13	7.80312	19.5294	2.17624	MELK	maternal embryonic leucine zipper kinase	Up	MELK_Up
203302_at	5.41e-11	3.54e-13	7.79573	19.4859	1.45222	DCK	deoxycytidine kinase	Up	DCK_Up
223363_at	5.59e-11	3.7e-13	7.7887	19.4445	1.05296	PSMG3	proteasome assembly chaperone 3	Up	PSMG3_Up
224885_s_at	5.77e-11	3.83e-13	7.78304	19.4112	1.09316	KRTCAP2	keratinocyte associated protein 2	Up	KRTCAP2_Up
53202_at	5.85e-11	3.9e-13	7.77997	19.3932	1.11224	C7orf25///PSMA2	chromosome 7 open reading frame 25///proteasome subunit alpha 2	Up	C7orf25///PSMA2_Up
225837_at	5.94e-11	3.98e-13	7.77657	19.3732	1.36566	RHNO1	RAD9-HUS1-RAD1 interacting nuclear orphan 1	Up	RHNO1_Up
202813_at	6.29e-11	4.23e-13	7.76665	19.3149	1.29138	TARBP1	TAR (HIV-1) RNA binding protein 1	Up	TARBP1_Up
222608_s_at	6.75e-11	4.58e-13	7.75347	19.2376	3.13963	ANLN	anillin actin binding protein	Up	ANLN_Up
201587_s_at	7.55e-11	5.19e-13	7.73271	19.1159	1.52209	IRAK1	interleukin 1 receptor associated kinase 1	Up	IRAK1_Up
219343_at	8.2e-11	5.66e-13	-7.71822	19.031	-1.8748	CDC37L1	cell division cycle 37 like 1	Down	CDC37L1_Down
206210_s_at	8.52e-11	5.92e-13	-7.71092	18.9883	-2.0955	CETP	cholesteryl ester transfer protein	Down	CETP_Down
204748_at	8.52e-11	5.93e-13	-7.71049	18.9858	-1.89351	PTGS2	prostaglandin-endoperoxide synthase 2	Down	PTGS2_Down
237262_at	8.62e-11	6.03e-13	-7.70776	18.9698	-1.39296	GAREM1	GRB2 associated regulator of MAPK1 subtype 1	Down	GAREM1_Down
202998_s_at	8.62e-11	6.05e-13	7.70712	18.9661	1.49251	LOXL2	lysyl oxidase like 2	Up	LOXL2_Up
208816_x_at	8.62e-11	6.06e-13	7.70697	18.9652	1.48989	ANXA2P2	annexin A2 pseudogene 2	Up	ANXA2P2_Up
225931_s_at	8.76e-11	6.17e-13	7.70382	18.9468	1.41941	RNF213	ring finger protein 213	Up	RNF213_Up
200661_at	8.95e-11	6.34e-13	7.69943	18.9211	1.26559	CTSA	cathepsin A	Up	CTSA_Up
224896_s_at	9.3e-11	6.64e-13	7.6918	18.8765	1.35774	TTL	tubulin tyrosine ligase	Up	TTL_Up
241843_at	9.83e-11	7.1e-13	-7.68069	18.8116	-1.75141	SNORA28///EIF5	small nucleolar RNA, H/ACA box 28///eukaryotic translation initiation factor 5	Down	SNORA28///EIF5_Down
1554283_at	1.03e-10	7.47e-13	-7.67207	18.7613	-1.12528	NOCT	nocturnin	Down	NOCT_Down
225539_at	1.04e-10	7.59e-13	-7.66961	18.7469	-1.52285	ZBTB21	zinc finger and BTB domain containing 21	Down	ZBTB21_Down
204023_at	1.05e-10	7.71e-13	7.66686	18.7309	1.865	RFC4	replication factor C subunit 4	Up	RFC4_Up
209284_s_at	1.06e-10	7.82e-13	7.66466	18.7181	1.08064	FAM208A	family with sequence similarity 208 member A	Up	FAM208A_Up
231188_at	1.06e-10	7.84e-13	7.66408	18.7147	1.08866	ZSCAN2	zinc finger and SCAN domain containing 2	Up	ZSCAN2_Up
213321_at	1.07e-10	7.95e-13	-7.66182	18.7016	-1.19582	BCKDHB	branched chain keto acid dehydrogenase E1 subunit beta	Down	BCKDHB_Down
227084_at	1.12e-10	8.41e-13	7.65237	18.6464	2.76977	DTNA	dystrobrevin alpha	Up	DTNA_Up
203629_s_at	1.15e-10	8.65e-13	7.64781	18.6199	1.10709	COG5	component of oligomeric golgi complex 5	Up	COG5_Up
213073_at	1.22e-10	9.18e-13	7.63786	18.5619	1.16601	ZFYVE26	zinc finger FYVE-type containing 26	Up	ZFYVE26_Up
213663_s_at	1.23e-10	9.34e-13	-7.63502	18.5454	-1.0973	FAM134B	family with sequence similarity 134 member B	Down	FAM134B_Down
219880_at	1.27e-10	9.7e-13	7.62861	18.5081	1.21714	CTC-338M12.4	uncharacterized LOC101928649	Up	CTC-338M12.4_Up
224818_at	1.27e-10	9.74e-13	7.62791	18.504	1.83308	SORT1	sortilin 1	Up	SORT1_Up
218184_at	1.31e-10	1e-12	7.62284	18.4746	1.20828	TULP4	tubby like protein 4	Up	TULP4_Up
226436_at	1.34e-10	1.04e-12	7.61768	18.4446	1.53849	RASSF4	Ras association domain family member 4	Up	RASSF4_Up
203755_at	1.45e-10	1.13e-12	7.60369	18.3633	2.56751	BUB1B	BUB1 mitotic checkpoint serine/threonine kinase B	Up	BUB1B_Up
200765_x_at	1.51e-10	1.18e-12	7.59641	18.321	1.00513	CTNNA1	catenin alpha 1	Up	CTNNA1_Up
225317_at	1.56e-10	1.23e-12	7.58939	18.2803	1.12005	ACBD6	acyl-CoA binding domain containing 6	Up	ACBD6_Up
216237_s_at	1.58e-10	1.24e-12	7.587	18.2664	1.75017	MCM5	minichromosome maintenance complex component 5	Up	MCM5_Up
227350_at	1.62e-10	1.29e-12	7.58074	18.2301	2.29968	HELLS	helicase, lymphoid-specific	Up	HELLS_Up
207262_at	1.7e-10	1.36e-12	-7.57173	18.1779	-3.87973	APOF	apolipoprotein F	Down	APOF_Down
205097_at	1.75e-10	1.4e-12	7.56697	18.1503	1.96221	SLC26A2	solute carrier family 26 member 2	Up	SLC26A2_Up
222640_at	1.8e-10	1.45e-12	7.56136	18.1179	1.38891	DNMT3A	DNA methyltransferase 3 alpha	Up	DNMT3A_Up
220949_s_at	1.81e-10	1.46e-12	7.56041	18.1124	1.11994	C7orf49	chromosome 7 open reading frame 49	Up	C7orf49_Up
225762_x_at	1.83e-10	1.48e-12	-7.55748	18.0954	-1.18878	RNA45S5	RNA, 45S pre-ribosomal 5	Down	RNA45S5_Down
214180_at	2.06e-10	1.67e-12	-7.53755	17.9802	-1.72637	MAN1C1	mannosidase alpha class 1C member 1	Down	MAN1C1_Down
208926_at	2.11e-10	1.73e-12	7.53223	17.9494	1.49366	NEU1	neuraminidase 1 (lysosomal sialidase)	Up	NEU1_Up
213720_s_at	2.15e-10	1.76e-12	7.52907	17.9311	1.28978	SMARCA4	SWI/SNF related, matrix associated, actin dependent regulator of chromatin, subfamily a, member 4	Up	SMARCA4_Up
237765_at	2.3e-10	1.9e-12	-7.51648	17.8585	-3.32752	SLC25A47	solute carrier family 25 member 47	Down	SLC25A47_Down
219148_at	2.61e-10	2.17e-12	7.49348	17.7259	2.93846	PBK	PDZ binding kinase	Up	PBK_Up
226128_at	2.68e-10	2.24e-12	7.48876	17.6987	1.21469	BROX	BRO1 domain and CAAX motif containing	Up	BROX_Up
203410_at	2.78e-10	2.33e-12	7.48194	17.6594	1.19501	AP3M2	adaptor related protein complex 3 mu 2 subunit	Up	AP3M2_Up
227554_at	2.84e-10	2.38e-12	-7.47786	17.636	-2.4811	MAGI2-AS3	MAGI2 antisense RNA 3	Down	MAGI2-AS3_Down
225903_at	2.93e-10	2.47e-12	7.4716	17.5999	1.00333	PIGU	phosphatidylinositol glycan anchor biosynthesis class U	Up	PIGU_Up
210609_s_at	3.15e-10	2.67e-12	7.45899	17.5274	1.92491	TP53I3	tumor protein p53 inducible protein 3	Up	TP53I3_Up
203120_at	3.3e-10	2.81e-12	7.44995	17.4755	1.26349	TP53BP2	tumor protein p53 binding protein 2	Up	TP53BP2_Up
209306_s_at	3.38e-10	2.88e-12	7.44573	17.4513	1.44953	SWAP70	SWAP switching B-cell complex 70kDa subunit	Up	SWAP70_Up
213320_at	3.53e-10	3.03e-12	7.43714	17.402	1.26579	PRMT3	protein arginine methyltransferase 3	Up	PRMT3_Up
204745_x_at	3.62e-10	3.12e-12	-7.43255	17.3757	-3.09089	MT1G	metallothionein 1G	Down	MT1G_Down
203466_at	3.65e-10	3.16e-12	7.43031	17.3628	1.18615	MPV17	MPV17, mitochondrial inner membrane protein	Up	MPV17_Up
219029_at	3.77e-10	3.27e-12	7.42462	17.3302	1.45597	TMEM267	transmembrane protein 267	Up	TMEM267_Up
200770_s_at	3.89e-10	3.38e-12	7.41894	17.2977	1.25073	LAMC1	laminin subunit gamma 1	Up	LAMC1_Up
227852_at	3.89e-10	3.41e-12	7.41752	17.2895	1.02815	RP9	retinitis pigmentosa 9 (autosomal dominant)	Up	RP9_Up
203073_at	4.01e-10	3.51e-12	7.41232	17.2598	1.04373	COG2	component of oligomeric golgi complex 2	Up	COG2_Up
203358_s_at	4.18e-10	3.7e-12	7.40364	17.2101	2.08756	EZH2	enhancer of zeste 2 polycomb repressive complex 2 subunit	Up	EZH2_Up
209304_x_at	4.21e-10	3.73e-12	-7.40239	17.2029	-1.94329	GADD45B	growth arrest and DNA damage inducible beta	Down	GADD45B_Down
218000_s_at	4.23e-10	3.76e-12	-7.40083	17.194	-1.82926	PHLDA1	pleckstrin homology like domain family A member 1	Down	PHLDA1_Down
203372_s_at	4.23e-10	3.77e-12	-7.40062	17.1928	-2.66477	SOCS2	suppressor of cytokine signaling 2	Down	SOCS2_Down
207027_at	4.41e-10	3.94e-12	-7.39276	17.1478	-3.20374	HGFAC	HGF activator	Down	HGFAC_Down
218909_at	4.43e-10	3.97e-12	7.39154	17.1409	1.36928	RPS6KC1	ribosomal protein S6 kinase C1	Up	RPS6KC1_Up
202025_x_at	4.43e-10	3.98e-12	-7.3912	17.1389	-1.35556	ACAA1	acetyl-CoA acyltransferase 1	Down	ACAA1_Down
203856_at	4.56e-10	4.11e-12	7.38584	17.1083	1.41775	VRK1	vaccinia related kinase 1	Up	VRK1_Up
226032_at	4.6e-10	4.15e-12	7.38416	17.0987	1.07981	CASP2	caspase 2	Up	CASP2_Up
203499_at	4.8e-10	4.36e-12	-7.37577	17.0507	-1.31619	EPHA2	EPH receptor A2	Down	EPHA2_Down
1554640_at	4.86e-10	4.42e-12	-7.37334	17.0369	-1.96557	PALM2	paralemmin 2	Down	PALM2_Down
221848_at	4.86e-10	4.43e-12	-7.37303	17.0351	-1.93859	ZGPAT	zinc finger CCCH-type and G-patch domain containing	Down	ZGPAT_Down
225834_at	5.09e-10	4.71e-12	7.36271	16.9762	2.73559	FAM72A///FAM72D///FAM72B///FAM72C	family with sequence similarity 72 member A///family with sequence similarity 72 member D///family with sequence similarity 72 member B///family with sequence similarity 72 member C	Up	FAM72A///FAM72D///FAM72B///FAM72C_Up
218544_s_at	5.14e-10	4.76e-12	-7.36085	16.9656	-1.84541	RCL1	RNA terminal phosphate cyclase like 1	Down	RCL1_Down
220994_s_at	5.26e-10	4.9e-12	7.356	16.938	1.74411	STXBP6	syntaxin binding protein 6	Up	STXBP6_Up
203909_at	5.35e-10	5e-12	7.35253	16.9182	1.05133	SLC9A6	solute carrier family 9 member A6	Up	SLC9A6_Up
202095_s_at	5.39e-10	5.06e-12	7.35035	16.9057	2.41668	BIRC5	baculoviral IAP repeat containing 5	Up	BIRC5_Up
204224_s_at	5.47e-10	5.16e-12	-7.34719	16.8878	-1.94133	GCH1	GTP cyclohydrolase 1	Down	GCH1_Down
224448_s_at	5.53e-10	5.23e-12	7.34471	16.8736	1.06471	MIR3934///UQCC2	microRNA 3934///ubiquinol-cytochrome c reductase complex assembly factor 2	Up	MIR3934///UQCC2_Up
1554408_a_at	5.63e-10	5.34e-12	7.34137	16.8546	1.69346	TK1	thymidine kinase 1	Up	TK1_Up
206797_at	5.77e-10	5.48e-12	-7.33678	16.8285	-3.1415	NAT2	N-acetyltransferase 2	Down	NAT2_Down
202743_at	5.8e-10	5.52e-12	7.33572	16.8224	1.40358	PIK3R3	phosphoinositide-3-kinase regulatory subunit 3	Up	PIK3R3_Up
204822_at	5.93e-10	5.66e-12	7.33126	16.797	2.78995	TTK	TTK protein kinase	Up	TTK_Up
213146_at	6.04e-10	5.79e-12	-7.32761	16.7763	-1.13667	KDM6B	lysine demethylase 6B	Down	KDM6B_Down
223173_at	6.07e-10	5.83e-12	7.32647	16.7698	1.05406	SPNS1	sphingolipid transporter 1 (putative)	Up	SPNS1_Up
211072_x_at	6.24e-10	6e-12	7.32144	16.7412	1.14534	TUBA1B	tubulin alpha 1b	Up	TUBA1B_Up
224452_s_at	6.28e-10	6.05e-12	7.32009	16.7335	1.09552	FAM220A	family with sequence similarity 220 member A	Up	FAM220A_Up
207978_s_at	6.58e-10	6.35e-12	-7.31191	16.687	-1.11924	NR4A3	nuclear receptor subfamily 4 group A member 3	Down	NR4A3_Down
203502_at	7.29e-10	7.05e-12	7.29395	16.585	1.362	BPGM	bisphosphoglycerate mutase	Up	BPGM_Up
227345_at	7.63e-10	7.45e-12	-7.28449	16.5314	-1.42082	TNFRSF10D	TNF receptor superfamily member 10d	Down	TNFRSF10D_Down
212407_at	7.67e-10	7.5e-12	7.28335	16.5249	1.02227	METTL13	methyltransferase like 13	Up	METTL13_Up
222735_at	7.91e-10	7.8e-12	7.27658	16.4865	1.40802	TMEM38B	transmembrane protein 38B	Up	TMEM38B_Up
1559239_s_at	7.97e-10	7.89e-12	-7.27476	16.4762	-1.05762	ACAT1	acetyl-CoA acetyltransferase 1	Down	ACAT1_Down
207076_s_at	8.02e-10	7.96e-12	-7.27323	16.4676	-1.71358	ASS1	argininosuccinate synthase 1	Down	ASS1_Down
216546_s_at	8.15e-10	8.12e-12	-7.26971	16.4476	-1.02058	CHI3L1	chitinase 3 like 1	Down	CHI3L1_Down
227822_at	8.27e-10	8.27e-12	7.26674	16.4308	1.51383	ZNF605	zinc finger protein 605	Up	ZNF605_Up
232124_at	8.38e-10	8.4e-12	-7.26401	16.4153	-1.28143	FAM198A	family with sequence similarity 198 member A	Down	FAM198A_Down
218355_at	8.51e-10	8.54e-12	7.26108	16.3988	2.42361	KIF4A	kinesin family member 4A	Up	KIF4A_Up
243463_s_at	8.52e-10	8.58e-12	7.26043	16.3951	1.49396	RIT1	Ras like without CAAX 1	Up	RIT1_Up
209218_at	8.78e-10	8.87e-12	7.2546	16.3621	2.56901	SQLE	squalene epoxidase	Up	SQLE_Up
220794_at	8.82e-10	8.94e-12	-7.25322	16.3543	-2.93221	GREM2	gremlin 2, DAN family BMP antagonist	Down	GREM2_Down
205307_s_at	9.1e-10	9.26e-12	-7.24723	16.3204	-2.49795	KMO	kynurenine 3-monooxygenase (kynurenine 3-hydroxylase)	Down	KMO_Down
218561_s_at	9.15e-10	9.35e-12	7.2457	16.3117	1.17265	LYRM4	LYR motif containing 4	Up	LYRM4_Up
212923_s_at	9.43e-10	9.67e-12	-7.23978	16.2783	-1.11075	PXDC1	PX domain containing 1	Down	PXDC1_Down
201874_at	1.01e-09	1.05e-11	7.22645	16.2031	1.19909	MPZL1	myelin protein zero like 1	Up	MPZL1_Up
225485_at	1.01e-09	1.05e-11	7.22575	16.1991	1.56835	CEP41	centrosomal protein 41	Up	CEP41_Up
204767_s_at	1.01e-09	1.05e-11	7.22558	16.1981	1.51534	FEN1	flap structure-specific endonuclease 1	Up	FEN1_Up
213226_at	1.01e-09	1.06e-11	7.22459	16.1925	2.39099	CCNA2	cyclin A2	Up	CCNA2_Up
210377_at	1.01e-09	1.06e-11	-7.22445	16.1918	-2.63002	ACSM3	acyl-CoA synthetase medium-chain family member 3	Down	ACSM3_Down
1553977_a_at	1.06e-09	1.11e-11	-7.21662	16.1476	-2.46252	CYP39A1	cytochrome P450 family 39 subfamily A member 1	Down	CYP39A1_Down
226536_at	1.06e-09	1.11e-11	7.21597	16.1439	1.35049	NSMCE2	NSE2/MMS21 homolog, SMC5-SMC6 complex SUMO ligase	Up	NSMCE2_Up
33494_at	1.09e-09	1.15e-11	-7.20954	16.1077	-1.84971	ETFDH	electron transfer flavoprotein dehydrogenase	Down	ETFDH_Down
220924_s_at	1.17e-09	1.24e-11	-7.19748	16.0397	-1.4452	SLC38A2	solute carrier family 38 member 2	Down	SLC38A2_Down
57539_at	1.17e-09	1.24e-11	-7.19682	16.036	-1.95019	ZGPAT///LIME1	zinc finger CCCH-type and G-patch domain containing///Lck interacting transmembrane adaptor 1	Down	ZGPAT///LIME1_Down
209275_s_at	1.2e-09	1.27e-11	7.19245	16.0114	1.06565	CLN3	CLN3, battenin	Up	CLN3_Up
202870_s_at	1.23e-09	1.32e-11	7.18645	15.9776	2.56428	CDC20	cell division cycle 20	Up	CDC20_Up
213526_s_at	1.23e-09	1.32e-11	7.18629	15.9767	1.0167	LIN37	lin-37 DREAM MuvB core complex component	Up	LIN37_Up
201268_at	1.27e-09	1.36e-11	7.18066	15.9451	1.08534	NME1-NME2///NME2	NME1-NME2 readthrough///NME/NM23 nucleoside diphosphate kinase 2	Up	NME1-NME2///NME2_Up
232138_at	1.27e-09	1.37e-11	-7.18014	15.9421	-2.51282	MBNL2	muscleblind like splicing regulator 2	Down	MBNL2_Down
227796_at	1.3e-09	1.41e-11	7.17488	15.9126	1.22283	ZFP62	ZFP62 zinc finger protein	Up	ZFP62_Up
202074_s_at	1.33e-09	1.45e-11	7.16985	15.8843	1.14341	OPTN	optineurin	Up	OPTN_Up
209219_at	1.34e-09	1.46e-11	7.1693	15.8812	1.22543	MIR1236///NELFE	microRNA 1236///negative elongation factor complex member E	Up	MIR1236///NELFE_Up
55081_at	1.34e-09	1.46e-11	7.16876	15.8782	1.08092	MICALL1	MICAL like 1	Up	MICALL1_Up
210891_s_at	1.43e-09	1.58e-11	7.15543	15.8034	1.05308	GTF2IP4///GTF2IP1///GTF2I	general transcription factor IIi pseudogene 4///general transcription factor IIi pseudogene 1///general transcription factor IIi	Up	GTF2IP4///GTF2IP1///GTF2I_Up
213931_at	1.45e-09	1.6e-11	-7.15307	15.7901	-2.06602	ID2B///ID2	inhibitor of DNA binding 2B, HLH protein (pseudogene)///inhibitor of DNA binding 2, HLH protein	Down	ID2B///ID2_Down
212186_at	1.46e-09	1.63e-11	7.15045	15.7754	1.18243	ACACA	acetyl-CoA carboxylase alpha	Up	ACACA_Up
223063_at	1.48e-09	1.65e-11	7.14804	15.7619	1.37289	C1orf198	chromosome 1 open reading frame 198	Up	C1orf198_Up
202153_s_at	1.48e-09	1.66e-11	7.14723	15.7573	1.05969	NUP62	nucleoporin 62	Up	NUP62_Up
203574_at	1.5e-09	1.69e-11	-7.14387	15.7385	-1.54651	NFIL3	nuclear factor, interleukin 3 regulated	Down	NFIL3_Down
215689_s_at	1.58e-09	1.79e-11	-7.13353	15.6806	-1.82521	SHBG	sex hormone binding globulin	Down	SHBG_Down
227336_at	1.59e-09	1.8e-11	-7.13261	15.6754	-1.36474	DTX1	deltex E3 ubiquitin ligase 1	Down	DTX1_Down
204480_s_at	1.61e-09	1.83e-11	7.13046	15.6633	1.30544	C9orf16	chromosome 9 open reading frame 16	Up	C9orf16_Up
209043_at	1.61e-09	1.84e-11	7.12914	15.656	1.34053	PAPSS1	3'-phosphoadenosine 5'-phosphosulfate synthase 1	Up	PAPSS1_Up
201797_s_at	1.73e-09	1.99e-11	7.11554	15.5799	1.30052	VARS	valyl-tRNA synthetase	Up	VARS_Up
206949_s_at	1.83e-09	2.12e-11	7.10452	15.5182	1.16158	RUSC1	RUN and SH3 domain containing 1	Up	RUSC1_Up
231705_at	1.88e-09	2.18e-11	-7.09983	15.492	-1.15743	RIDA	reactive intermediate imine deaminase A homolog	Down	RIDA_Down
203714_s_at	2e-09	2.34e-11	7.0877	15.4243	1.2391	TBCE	tubulin folding cofactor E	Up	TBCE_Up
225457_s_at	2e-09	2.34e-11	7.08722	15.4216	1.5323	OLMALINC///PP7080	oligodendrocyte maturation-associated long intergenic non-coding RNA///uncharacterized LOC25845	Up	OLMALINC///PP7080_Up
209696_at	2.05e-09	2.42e-11	-7.08132	15.3887	-2.43116	FBP1	fructose-bisphosphatase 1	Down	FBP1_Down
201518_at	2.07e-09	2.46e-11	7.07871	15.3742	1.28121	CBX1	chromobox 1	Up	CBX1_Up
206132_at	2.13e-09	2.55e-11	-7.07264	15.3403	-1.0726	MCC	mutated in colorectal cancers	Down	MCC_Down
204247_s_at	2.19e-09	2.62e-11	7.06771	15.3128	1.09527	CDK5	cyclin dependent kinase 5	Up	CDK5_Up
222369_at	2.19e-09	2.64e-11	7.06673	15.3074	1.23057	NAA40	N(alpha)-acetyltransferase 40, NatD catalytic subunit	Up	NAA40_Up
209531_at	2.23e-09	2.69e-11	-7.06323	15.2879	-2.02882	GSTZ1	glutathione S-transferase zeta 1	Down	GSTZ1_Down
202340_x_at	2.24e-09	2.71e-11	-7.06214	15.2818	-1.17284	NR4A1	nuclear receptor subfamily 4 group A member 1	Down	NR4A1_Down
201771_at	2.38e-09	2.89e-11	7.05065	15.2178	1.09012	SCAMP3	secretory carrier membrane protein 3	Up	SCAMP3_Up
212856_at	2.41e-09	2.93e-11	-7.0482	15.2042	-1.47541	GRAMD4	GRAM domain containing 4	Down	GRAMD4_Down
243539_at	2.48e-09	3.02e-11	7.04308	15.1758	1.26651	KIAA1841	KIAA1841	Up	KIAA1841_Up
201774_s_at	2.51e-09	3.06e-11	7.04072	15.1626	1.48021	NCAPD2	non-SMC condensin I complex subunit D2	Up	NCAPD2_Up
218622_at	2.62e-09	3.24e-11	7.03092	15.1082	1.32042	NUP37	nucleoporin 37	Up	NUP37_Up
218361_at	2.65e-09	3.29e-11	7.02839	15.0941	1.12582	GOLPH3L	golgi phosphoprotein 3 like	Up	GOLPH3L_Up
222848_at	2.69e-09	3.35e-11	7.02498	15.0752	2.12589	CENPK	centromere protein K	Up	CENPK_Up
209421_at	2.77e-09	3.46e-11	7.0194	15.0442	1.78883	MSH2	mutS homolog 2	Up	MSH2_Up
222514_at	2.8e-09	3.5e-11	7.01755	15.034	1.16705	RRAGC	Ras related GTP binding C	Up	RRAGC_Up
202107_s_at	2.98e-09	3.75e-11	7.00515	14.9652	1.9486	MCM2	minichromosome maintenance complex component 2	Up	MCM2_Up
203262_s_at	3.02e-09	3.8e-11	7.00279	14.9521	1.15489	FAM50A	family with sequence similarity 50 member A	Up	FAM50A_Up
222997_s_at	3.09e-09	3.92e-11	6.99753	14.923	1.00979	MRPS21	mitochondrial ribosomal protein S21	Up	MRPS21_Up
211440_x_at	3.33e-09	4.27e-11	-6.98249	14.8398	-1.66729	CYP3A43	cytochrome P450 family 3 subfamily A member 43	Down	CYP3A43_Down
205345_at	3.41e-09	4.38e-11	6.97821	14.8161	1.52962	BARD1	BRCA1 associated RING domain 1	Up	BARD1_Up
201555_at	3.42e-09	4.4e-11	6.97731	14.8111	1.4457	MCM3	minichromosome maintenance complex component 3	Up	MCM3_Up
233540_s_at	3.46e-09	4.47e-11	6.97473	14.7968	1.44324	CDK5RAP2	CDK5 regulatory subunit associated protein 2	Up	CDK5RAP2_Up
201201_at	3.5e-09	4.53e-11	6.97208	14.7821	1.15605	CSTB	cystatin B	Up	CSTB_Up
206938_at	3.74e-09	4.87e-11	-6.95943	14.7123	-2.42958	SRD5A2	steroid 5 alpha-reductase 2	Down	SRD5A2_Down
212445_s_at	3.79e-09	4.96e-11	6.95644	14.6958	1.49843	NEDD4L	neural precursor cell expressed, developmentally down-regulated 4-like, E3 ubiquitin protein ligase	Up	NEDD4L_Up
203564_at	3.86e-09	5.07e-11	6.95245	14.6738	1.17479	FANCG	Fanconi anemia complementation group G	Up	FANCG_Up
228151_at	4.22e-09	5.59e-11	6.93543	14.58	1.17531	ARL15	ADP ribosylation factor like GTPase 15	Up	ARL15_Up
203550_s_at	4.33e-09	5.76e-11	6.93021	14.5512	1.01817	FAM189B	family with sequence similarity 189 member B	Up	FAM189B_Up
217167_x_at	4.37e-09	5.83e-11	-6.92793	14.5387	-1.32011	GK	glycerol kinase	Down	GK_Down
208999_at	4.37e-09	5.84e-11	6.92753	14.5364	1.16402	SEPT8	septin 8	Up	SEPT8_Up
213355_at	4.4e-09	5.9e-11	-6.92593	14.5276	-1.93575	ST3GAL6	ST3 beta-galactoside alpha-2,3-sialyltransferase 6	Down	ST3GAL6_Down
208808_s_at	4.63e-09	6.22e-11	6.91645	14.4755	1.76989	HMGB2	high mobility group box 2	Up	HMGB2_Up
225655_at	4.77e-09	6.46e-11	6.90989	14.4394	2.15657	UHRF1	ubiquitin like with PHD and ring finger domains 1	Up	UHRF1_Up
230165_at	4.91e-09	6.66e-11	6.90459	14.4103	2.00053	SGO2	shugoshin 2	Up	SGO2_Up
206461_x_at	5.09e-09	6.93e-11	-6.89758	14.3718	-2.7387	MT1H	metallothionein 1H	Down	MT1H_Down
203429_s_at	5.59e-09	7.67e-11	6.87959	14.2731	1.38562	SUCO	SUN domain containing ossification factor	Up	SUCO_Up
231824_at	5.86e-09	8.13e-11	-6.86939	14.2172	-1.15538	LARP1B	La ribonucleoprotein domain family member 1B	Down	LARP1B_Down
213581_at	5.89e-09	8.18e-11	6.86838	14.2116	1.53393	PDCD2	programmed cell death 2	Up	PDCD2_Up
219014_at	6.2e-09	8.62e-11	-6.85895	14.16	-2.55913	PLAC8	placenta specific 8	Down	PLAC8_Down
207576_x_at	6.27e-09	8.77e-11	-6.85605	14.1442	-1.17729	OXT	oxytocin/neurophysin I prepropeptide	Down	OXT_Down
210612_s_at	6.43e-09	9.04e-11	6.85067	14.1147	1.68286	SYNJ2	synaptojanin 2	Up	SYNJ2_Up
230143_at	6.44e-09	9.06e-11	-6.85016	14.112	-1.07411	RNF165	ring finger protein 165	Down	RNF165_Down
208021_s_at	6.49e-09	9.15e-11	6.84841	14.1024	1.08141	RFC1	replication factor C subunit 1	Up	RFC1_Up
210143_at	6.67e-09	9.44e-11	-6.84291	14.0723	-2.84652	ANXA10	annexin A10	Down	ANXA10_Down
219481_at	6.73e-09	9.55e-11	6.84091	14.0614	1.16526	TTC13	tetratricopeptide repeat domain 13	Up	TTC13_Up
223307_at	6.75e-09	9.61e-11	6.83988	14.0558	1.81111	CDCA3	cell division cycle associated 3	Up	CDCA3_Up
205225_at	7.04e-09	1.01e-10	-6.83144	14.0097	-3.09007	ESR1	estrogen receptor 1	Down	ESR1_Down
235840_at	7.11e-09	1.02e-10	6.82927	13.9978	1.33438	ZKSCAN3	zinc finger with KRAB and SCAN domains 3	Up	ZKSCAN3_Up
202954_at	7.16e-09	1.03e-10	6.82744	13.9878	1.99551	UBE2C	ubiquitin conjugating enzyme E2 C	Up	UBE2C_Up
201566_x_at	7.43e-09	1.07e-10	-6.82018	13.9482	-1.36705	ID2	inhibitor of DNA binding 2, HLH protein	Down	ID2_Down
213008_at	7.58e-09	1.1e-10	6.81557	13.9231	1.46061	FANCI	Fanconi anemia complementation group I	Up	FANCI_Up
223532_at	7.58e-09	1.1e-10	6.81549	13.9227	1.0213	ANKRD39	ankyrin repeat domain 39	Up	ANKRD39_Up
203077_s_at	7.88e-09	1.15e-10	6.80766	13.88	1.21946	SMAD2	SMAD family member 2	Up	SMAD2_Up
212218_s_at	8.2e-09	1.21e-10	6.79926	13.8343	1.85803	FASN	fatty acid synthase	Up	FASN_Up
204929_s_at	8.32e-09	1.23e-10	6.79632	13.8183	1.26355	VAMP5	vesicle associated membrane protein 5	Up	VAMP5_Up
206561_s_at	8.5e-09	1.26e-10	6.79237	13.7968	5.04749	AKR1B10	aldo-keto reductase family 1 member B10	Up	AKR1B10_Up
201681_s_at	8.56e-09	1.27e-10	6.79089	13.7888	1.61639	DLG5	discs large MAGUK scaffold protein 5	Up	DLG5_Up
231358_at	8.67e-09	1.29e-10	-6.78814	13.7738	-1.19647	MRO	maestro	Down	MRO_Down
202145_at	8.88e-09	1.32e-10	-6.78329	13.7474	-2.36908	LY6E	lymphocyte antigen 6 complex, locus E	Down	LY6E_Down
208955_at	9.1e-09	1.36e-10	6.77807	13.719	1.46416	DUT	deoxyuridine triphosphatase	Up	DUT_Up
218935_at	9.1e-09	1.36e-10	-6.77795	13.7184	-1.25686	EHD3	EH domain containing 3	Down	EHD3_Down
205463_s_at	9.15e-09	1.37e-10	6.77658	13.7109	1.97471	PDGFA	platelet derived growth factor subunit A	Up	PDGFA_Up
204326_x_at	9.33e-09	1.4e-10	-6.77287	13.6908	-2.89234	MT1X	metallothionein 1X	Down	MT1X_Down
210106_at	9.62e-09	1.45e-10	-6.76724	13.6602	-1.52499	BLOC1S1-RDH5///RDH5	BLOC1S1-RDH5 readthrough///retinol dehydrogenase 5	Down	BLOC1S1-RDH5///RDH5_Down
1556499_s_at	1.03e-08	1.56e-10	6.75415	13.5892	3.05153	COL1A1	collagen type I alpha 1 chain	Up	COL1A1_Up
213869_x_at	1.04e-08	1.57e-10	6.75238	13.5796	1.35504	THY1	Thy-1 cell surface antigen	Up	THY1_Up
218024_at	1.04e-08	1.57e-10	-6.75201	13.5777	-1.23363	MPC1	mitochondrial pyruvate carrier 1	Down	MPC1_Down
218662_s_at	1.07e-08	1.63e-10	6.74595	13.5448	2.13473	NCAPG	non-SMC condensin I complex subunit G	Up	NCAPG_Up
202321_at	1.07e-08	1.63e-10	6.74591	13.5446	1.34604	GGPS1	geranylgeranyl diphosphate synthase 1	Up	GGPS1_Up
212256_at	1.07e-08	1.64e-10	6.74515	13.5405	1.18915	GALNT10	polypeptide N-acetylgalactosaminyltransferase 10	Up	GALNT10_Up
225399_at	1.07e-08	1.64e-10	6.74507	13.5401	1.24988	TSEN15	tRNA splicing endonuclease subunit 15	Up	TSEN15_Up
219675_s_at	1.09e-08	1.67e-10	6.74147	13.5206	1.13164	UXS1	UDP-glucuronate decarboxylase 1	Up	UXS1_Up
211456_x_at	1.12e-08	1.72e-10	-6.73676	13.4951	-2.28982	MT1HL1	metallothionein 1H-like 1	Down	MT1HL1_Down
203666_at	1.15e-08	1.78e-10	-6.73031	13.4602	-1.93712	CXCL12	C-X-C motif chemokine ligand 12	Down	CXCL12_Down
219376_at	1.17e-08	1.81e-10	6.72737	13.4443	1.01463	ZNF322	zinc finger protein 322	Up	ZNF322_Up
55065_at	1.21e-08	1.89e-10	6.71959	13.4022	1.11929	MARK4	microtubule affinity regulating kinase 4	Up	MARK4_Up
232017_at	1.22e-08	1.91e-10	-6.71748	13.3908	-2.02859	TJP2	tight junction protein 2	Down	TJP2_Down
228401_at	1.23e-08	1.92e-10	6.71685	13.3874	1.88294	ATAD2	ATPase family, AAA domain containing 2	Up	ATAD2_Up
230200_at	1.24e-08	1.94e-10	-6.71493	13.377	-1.28405	NSUN6	NOP2/Sun RNA methyltransferase family member 6	Down	NSUN6_Down
223993_s_at	1.24e-08	1.95e-10	6.71408	13.3725	1.22347	CNIH4	cornichon family AMPA receptor auxiliary protein 4	Up	CNIH4_Up
203566_s_at	1.25e-08	1.97e-10	-6.71199	13.3612	-1.30802	AGL	amylo-alpha-1, 6-glucosidase, 4-alpha-glucanotransferase	Down	AGL_Down
218910_at	1.26e-08	1.98e-10	6.71103	13.356	1.12725	ANO10	anoctamin 10	Up	ANO10_Up
218755_at	1.27e-08	2e-10	6.70884	13.3441	2.17924	KIF20A	kinesin family member 20A	Up	KIF20A_Up
222603_at	1.43e-08	2.29e-10	6.68498	13.2155	1.42963	ERMP1	endoplasmic reticulum metallopeptidase 1	Up	ERMP1_Up
203500_at	1.49e-08	2.4e-10	-6.67622	13.1683	-1.42927	GCDH	glutaryl-CoA dehydrogenase	Down	GCDH_Down
211303_x_at	1.51e-08	2.45e-10	-6.67299	13.151	-2.32473	FOLH1B	folate hydrolase 1B	Down	FOLH1B_Down
1553993_s_at	1.67e-08	2.74e-10	6.65287	13.0428	1.06211	MIR6800///MED25	microRNA 6800///mediator complex subunit 25	Up	MIR6800///MED25_Up
214061_at	1.68e-08	2.77e-10	6.65083	13.0319	1.42389	TBC1D31	TBC1 domain family member 31	Up	TBC1D31_Up
202404_s_at	1.75e-08	2.9e-10	6.64247	12.987	3.14632	COL1A2	collagen type I alpha 2 chain	Up	COL1A2_Up
215074_at	1.75e-08	2.92e-10	-6.64157	12.9822	-1.08606	MYO1B	myosin IB	Down	MYO1B_Down
216336_x_at	1.77e-08	2.96e-10	-6.63882	12.9674	-2.53502	MT1E	metallothionein 1E	Down	MT1E_Down
227558_at	1.85e-08	3.09e-10	6.63088	12.9248	1.26161	CBX4	chromobox 4	Up	CBX4_Up
202487_s_at	1.9e-08	3.2e-10	6.6247	12.8918	1.1203	H2AFV	H2A histone family member V	Up	H2AFV_Up
201531_at	2.03e-08	3.42e-10	-6.6128	12.8281	-1.2858	ZFP36	ZFP36 ring finger protein	Down	ZFP36_Down
226826_at	2.03e-08	3.42e-10	6.61259	12.8269	1.27961	LSM11	LSM11, U7 small nuclear RNA associated	Up	LSM11_Up
208868_s_at	2.03e-08	3.42e-10	-6.61257	12.8268	-1.49141	GABARAPL1	GABA type A receptor associated protein like 1	Down	GABARAPL1_Down
202724_s_at	2.08e-08	3.53e-10	-6.60731	12.7987	-1.33988	FOXO1	forkhead box O1	Down	FOXO1_Down
238574_at	2.08e-08	3.53e-10	6.60707	12.7974	1.06288	SLC25A51	solute carrier family 25 member 51	Up	SLC25A51_Up
204127_at	2.1e-08	3.57e-10	6.60478	12.7852	1.45539	RFC3	replication factor C subunit 3	Up	RFC3_Up
210986_s_at	2.2e-08	3.76e-10	6.59574	12.7369	1.38975	TPM1	tropomyosin 1 (alpha)	Up	TPM1_Up
212230_at	2.21e-08	3.77e-10	-6.59522	12.7341	-1.2074	PLPP3	phospholipid phosphatase 3	Down	PLPP3_Down
223207_x_at	2.23e-08	3.81e-10	6.59338	12.7243	1.1044	PHPT1	phosphohistidine phosphatase 1	Up	PHPT1_Up
226233_at	2.37e-08	4.09e-10	6.58047	12.6554	1.07302	B3GALNT2	beta-1,3-N-acetylgalactosaminyltransferase 2	Up	B3GALNT2_Up
224243_at	2.42e-08	4.18e-10	-6.5765	12.6342	-1.88768	APOA5	apolipoprotein A5	Down	APOA5_Down
213485_s_at	2.42e-08	4.19e-10	6.57604	12.6318	1.12218	ABCC10	ATP binding cassette subfamily C member 10	Up	ABCC10_Up
218541_s_at	2.42e-08	4.2e-10	-6.57567	12.6298	-2.19369	C8orf4	chromosome 8 open reading frame 4	Down	C8orf4_Down
238122_at	2.44e-08	4.24e-10	6.5738	12.6198	1.07741	RBM12B	RNA binding motif protein 12B	Up	RBM12B_Up
213599_at	2.45e-08	4.25e-10	6.5734	12.6177	1.92961	OIP5	Opa interacting protein 5	Up	OIP5_Up
208938_at	2.58e-08	4.54e-10	6.56148	12.5542	1.10735	PRCC	papillary renal cell carcinoma (translocation-associated)	Up	PRCC_Up
203764_at	2.6e-08	4.59e-10	6.55939	12.5431	2.40861	DLGAP5	DLG associated protein 5	Up	DLGAP5_Up
232224_at	2.61e-08	4.61e-10	-6.55879	12.5399	-1.58871	MASP1	mannan binding lectin serine peptidase 1	Down	MASP1_Down
214420_s_at	2.62e-08	4.63e-10	-6.5581	12.5362	-2.01004	CYP2C9	cytochrome P450 family 2 subfamily C member 9	Down	CYP2C9_Down
222988_s_at	2.63e-08	4.67e-10	6.55655	12.528	1.13221	TMEM9	transmembrane protein 9	Up	TMEM9_Up
209448_at	2.64e-08	4.68e-10	6.55589	12.5245	1.27	HTATIP2	HIV-1 Tat interactive protein 2	Up	HTATIP2_Up
218901_at	2.67e-08	4.74e-10	-6.5535	12.5117	-1.68184	PLSCR4	phospholipid scramblase 4	Down	PLSCR4_Down
202748_at	2.78e-08	4.97e-10	6.54523	12.4678	1.69762	GBP2	guanylate binding protein 2	Up	GBP2_Up
214264_s_at	2.78e-08	4.98e-10	6.54461	12.4645	1.0846	EFCAB11	EF-hand calcium binding domain 11	Up	EFCAB11_Up
208562_s_at	2.79e-08	5.01e-10	-6.54366	12.4594	-1.31825	ABCC9	ATP binding cassette subfamily C member 9	Down	ABCC9_Down
207735_at	2.83e-08	5.08e-10	-6.54108	12.4457	-1.80919	RNF125	ring finger protein 125	Down	RNF125_Down
212556_at	2.87e-08	5.17e-10	6.53796	12.4291	1.19515	SCRIB	scribbled planar cell polarity protein	Up	SCRIB_Up
238021_s_at	2.94e-08	5.33e-10	6.53242	12.3998	3.1001	CRNDE	colorectal neoplasia differentially expressed (non-protein coding)	Up	CRNDE_Up
205339_at	2.96e-08	5.36e-10	6.53129	12.3938	1.39632	STIL	SCL/TAL1 interrupting locus	Up	STIL_Up
221827_at	3.02e-08	5.49e-10	6.52706	12.3713	1.13178	RBCK1	RANBP2-type and C3HC4-type zinc finger containing 1	Up	RBCK1_Up
211762_s_at	3.04e-08	5.52e-10	6.52592	12.3653	1.77658	KPNA2	karyopherin subunit alpha 2	Up	KPNA2_Up
204484_at	3.06e-08	5.58e-10	6.52405	12.3553	1.0973	PIK3C2B	phosphatidylinositol-4-phosphate 3-kinase catalytic subunit type 2 beta	Up	PIK3C2B_Up
231070_at	3.11e-08	5.67e-10	-6.52107	12.3395	-1.74529	IYD	iodotyrosine deiodinase	Down	IYD_Down
214430_at	3.2e-08	5.87e-10	6.51489	12.3068	1.21812	GLA	galactosidase alpha	Up	GLA_Up
201329_s_at	3.24e-08	5.96e-10	-6.51205	12.2917	-1.28488	ETS2	ETS proto-oncogene 2, transcription factor	Down	ETS2_Down
230792_at	3.43e-08	6.35e-10	-6.5004	12.23	-1.14774	FAAH2	fatty acid amide hydrolase 2	Down	FAAH2_Down
212021_s_at	3.46e-08	6.42e-10	6.49834	12.2191	1.52779	MKI67	marker of proliferation Ki-67	Up	MKI67_Up
242541_at	3.52e-08	6.58e-10	-6.49399	12.1961	-1.3616	ABCA9	ATP binding cassette subfamily A member 9	Down	ABCA9_Down
211920_at	3.64e-08	6.87e-10	-6.48595	12.1537	-1.02751	CFB	complement factor B	Down	CFB_Down
219372_at	3.69e-08	6.97e-10	6.48335	12.1399	1.19744	IFT81	intraflagellar transport 81	Up	IFT81_Up
211340_s_at	3.71e-08	7.03e-10	6.48181	12.1318	1.58978	MIR6756///MCAM	microRNA 6756///melanoma cell adhesion molecule	Up	MIR6756///MCAM_Up
204835_at	3.71e-08	7.03e-10	6.48175	12.1314	1.15583	POLA1	DNA polymerase alpha 1, catalytic subunit	Up	POLA1_Up
219544_at	3.76e-08	7.13e-10	6.47917	12.1179	1.15478	BORA	bora, aurora kinase A activator	Up	BORA_Up
203846_at	3.85e-08	7.33e-10	6.47431	12.0922	1.01133	TRIM32	tripartite motif containing 32	Up	TRIM32_Up
235004_at	3.89e-08	7.4e-10	6.47244	12.0823	2.60093	RBM24	RNA binding motif protein 24	Up	RBM24_Up
211963_s_at	3.89e-08	7.42e-10	6.47189	12.0794	1.02697	ARPC5	actin related protein 2/3 complex subunit 5	Up	ARPC5_Up
209960_at	3.9e-08	7.44e-10	-6.47142	12.0769	-2.5527	HGF	hepatocyte growth factor	Down	HGF_Down
203336_s_at	4.04e-08	7.72e-10	6.46466	12.0413	1.18155	ITGB1BP1	integrin subunit beta 1 binding protein 1	Up	ITGB1BP1_Up
206734_at	4.06e-08	7.77e-10	6.46347	12.035	1.17954	JRKL	JRK-like	Up	JRKL_Up
213684_s_at	4.06e-08	7.78e-10	-6.46338	12.0345	-1.67692	PDLIM5	PDZ and LIM domain 5	Down	PDLIM5_Down
200798_x_at	4.19e-08	8.05e-10	-6.45695	12.0006	-1.47034	MCL1	BCL2 family apoptosis regulator	Down	MCL1_Down
226129_at	4.38e-08	8.47e-10	6.44765	11.9517	1.41438	FAM83H	family with sequence similarity 83 member H	Up	FAM83H_Up
239413_at	4.4e-08	8.52e-10	6.4467	11.9467	1.20582	CEP152	centrosomal protein 152	Up	CEP152_Up
225275_at	4.4e-08	8.53e-10	6.44635	11.9448	2.59462	EDIL3	EGF like repeats and discoidin domains 3	Up	EDIL3_Up
205436_s_at	4.41e-08	8.55e-10	6.44605	11.9432	1.36641	H2AFX	H2A histone family member X	Up	H2AFX_Up
229359_at	4.46e-08	8.67e-10	6.44341	11.9294	1.11441	ASXL2	additional sex combs like 2, transcriptional regulator	Up	ASXL2_Up
225578_at	4.52e-08	8.78e-10	6.44106	11.917	1.31279	MZT1	mitotic spindle organizing protein 1	Up	MZT1_Up
211699_x_at	4.52e-08	8.8e-10	-6.44063	11.9147	-2.08331	HBA2///HBA1	hemoglobin subunit alpha 2///hemoglobin subunit alpha 1	Down	HBA2///HBA1_Down
202633_at	4.54e-08	8.85e-10	6.43958	11.9092	1.07537	TOPBP1	topoisomerase (DNA) II binding protein 1	Up	TOPBP1_Up
224707_at	4.55e-08	8.88e-10	6.4391	11.9067	1.01398	CYSTM1	cysteine rich transmembrane module containing 1	Up	CYSTM1_Up
210063_at	4.65e-08	9.09e-10	-6.43469	11.8835	-1.31264	SARDH	sarcosine dehydrogenase	Down	SARDH_Down
213478_at	4.8e-08	9.46e-10	-6.42743	11.8453	-1.5505	KAZN	kazrin, periplakin interacting protein	Down	KAZN_Down
205392_s_at	4.8e-08	9.47e-10	-6.4273	11.8447	-1.65291	CCL15-CCL14///CCL14	CCL15-CCL14 readthrough (NMD candidate)///C-C motif chemokine ligand 14	Down	CCL15-CCL14///CCL14_Down
222529_at	4.83e-08	9.53e-10	-6.42605	11.8381	-1.50313	SLC25A37	solute carrier family 25 member 37	Down	SLC25A37_Down
206867_at	4.9e-08	9.7e-10	-6.42277	11.8209	-1.57675	GCKR	glucokinase (hexokinase 4) regulator	Down	GCKR_Down
209220_at	4.9e-08	9.72e-10	6.42245	11.8192	4.44524	GPC3	glypican 3	Up	GPC3_Up
1555434_a_at	4.97e-08	9.87e-10	-6.4197	11.8048	-1.9525	SLC39A14	solute carrier family 39 member 14	Down	SLC39A14_Down
218543_s_at	4.97e-08	9.87e-10	6.41958	11.8042	1.15982	PARP12	poly(ADP-ribose) polymerase family member 12	Up	PARP12_Up
223274_at	5e-08	9.95e-10	6.41809	11.7963	1.43032	TCF19	transcription factor 19	Up	TCF19_Up
215990_s_at	5.01e-08	9.99e-10	-6.41732	11.7923	-1.20218	BCL6	B-cell CLL/lymphoma 6	Down	BCL6_Down
233887_at	5.04e-08	1.01e-09	-6.41628	11.7868	-1.55801	ADGRG6	adhesion G protein-coupled receptor G6	Down	ADGRG6_Down
209035_at	5.06e-08	1.01e-09	6.41473	11.7787	2.24829	MDK	midkine (neurite growth-promoting factor 2)	Up	MDK_Up
231683_at	5.06e-08	1.01e-09	-6.41462	11.7781	-2.33445	GLYAT	glycine-N-acyltransferase	Down	GLYAT_Down
204240_s_at	5.06e-08	1.02e-09	6.41441	11.777	1.48822	SMC2	structural maintenance of chromosomes 2	Up	SMC2_Up
235253_at	5.09e-08	1.02e-09	6.41328	11.7711	1.06628	RAD1	RAD1 checkpoint DNA exonuclease	Up	RAD1_Up
212143_s_at	5.09e-08	1.02e-09	-6.41308	11.77	-2.15851	IGFBP3	insulin like growth factor binding protein 3	Down	IGFBP3_Down
213596_at	5.12e-08	1.03e-09	-6.41155	11.762	-1.34632	CASP4	caspase 4	Down	CASP4_Down
202779_s_at	5.13e-08	1.04e-09	6.41079	11.758	1.82435	UBE2S	ubiquitin conjugating enzyme E2 S	Up	UBE2S_Up
212526_at	5.16e-08	1.04e-09	-6.40953	11.7514	-1.5453	SPG20	spastic paraplegia 20 (Troyer syndrome)	Down	SPG20_Down
209586_s_at	5.18e-08	1.05e-09	6.4085	11.746	1.13429	PRUNE1	prune exopolyphosphatase	Up	PRUNE1_Up
226426_at	5.19e-08	1.05e-09	6.40809	11.7439	1.00913	ADNP	activity dependent neuroprotector homeobox	Up	ADNP_Up
226668_at	5.24e-08	1.06e-09	6.40606	11.7332	1.19126	WDSUB1	WD repeat, sterile alpha motif and U-box domain containing 1	Up	WDSUB1_Up
227646_at	5.24e-08	1.06e-09	6.40579	11.7318	1.81026	EBF1	early B-cell factor 1	Up	EBF1_Up
243706_at	5.3e-08	1.08e-09	-6.40359	11.7203	-1.89114	CDO1	cysteine dioxygenase type 1	Down	CDO1_Down
1555411_a_at	5.33e-08	1.09e-09	-6.40207	11.7123	-1.12532	CCNL1	cyclin L1	Down	CCNL1_Down
226463_at	5.38e-08	1.1e-09	6.39966	11.6997	1.49028	ATP6V1C1	ATPase H+ transporting V1 subunit C1	Up	ATP6V1C1_Up
226859_at	5.47e-08	1.12e-09	-6.39584	11.6797	-1.46516	DNAJC25-GNG10///DNAJC25	DNAJC25-GNG10 readthrough///DnaJ heat shock protein family (Hsp40) member C25	Down	DNAJC25-GNG10///DNAJC25_Down
238756_at	5.52e-08	1.14e-09	6.39384	11.6692	1.91451	GAS2L3	growth arrest specific 2 like 3	Up	GAS2L3_Up
204033_at	5.54e-08	1.14e-09	6.39297	11.6647	1.82794	TRIP13	thyroid hormone receptor interactor 13	Up	TRIP13_Up
201577_at	5.97e-08	1.24e-09	6.37692	11.5807	1.2976	NME1	NME/NM23 nucleoside diphosphate kinase 1	Up	NME1_Up
221803_s_at	6.19e-08	1.29e-09	-6.36969	11.543	-1.19498	NRBF2	nuclear receptor binding factor 2	Down	NRBF2_Down
205355_at	6.38e-08	1.34e-09	-6.36333	11.5097	-1.73944	ACADSB	acyl-CoA dehydrogenase, short/branched chain	Down	ACADSB_Down
214696_at	6.38e-08	1.34e-09	-6.36301	11.5081	-1.25705	MIR22///MIR22HG	microRNA 22///MIR22 host gene	Down	MIR22///MIR22HG_Down
1554572_a_at	6.45e-08	1.36e-09	6.36045	11.4947	1.13267	SUV39H2	suppressor of variegation 3-9 homolog 2	Up	SUV39H2_Up
209408_at	6.45e-08	1.36e-09	6.36002	11.4925	1.81582	KIF2C	kinesin family member 2C	Up	KIF2C_Up
214805_at	6.58e-08	1.4e-09	-6.35543	11.4685	-1.45974	SNORD10///SNORA48///SNORA67///EIF4A1	small nucleolar RNA, C/D box 10///small nucleolar RNA, H/ACA box 48///small nucleolar RNA, H/ACA box 67///eukaryotic translation initiation factor 4A1	Down	SNORD10///SNORA48///SNORA67///EIF4A1_Down
222396_at	6.68e-08	1.42e-09	6.35223	11.4519	1.02875	HN1	hematological and neurological expressed 1	Up	HN1_Up
210054_at	6.76e-08	1.44e-09	6.34946	11.4374	1.08208	HAUS3	HAUS augmin like complex subunit 3	Up	HAUS3_Up
212765_at	6.92e-08	1.49e-09	6.34395	11.4087	1.24866	CAMSAP2	calmodulin regulated spectrin associated protein family member 2	Up	CAMSAP2_Up
226901_at	6.94e-08	1.49e-09	6.34328	11.4052	1.24619	C17orf58	chromosome 17 open reading frame 58	Up	C17orf58_Up
209627_s_at	6.95e-08	1.5e-09	6.34266	11.402	1.44061	OSBPL3	oxysterol binding protein like 3	Up	OSBPL3_Up
205046_at	7.02e-08	1.51e-09	6.34074	11.392	1.61964	CENPE	centromere protein E	Up	CENPE_Up
210720_s_at	7.05e-08	1.52e-09	6.33973	11.3867	1.11655	NECAB3	N-terminal EF-hand calcium binding protein 3	Up	NECAB3_Up
230100_x_at	7.11e-08	1.54e-09	6.33798	11.3776	1.3009	PAK1	p21 (RAC1) activated kinase 1	Up	PAK1_Up
218503_at	7.27e-08	1.58e-09	6.33298	11.3516	1.0851	FOCAD	focadhesin	Up	FOCAD_Up
207008_at	7.39e-08	1.61e-09	-6.32935	11.3327	-1.193	CXCR2	C-X-C motif chemokine receptor 2	Down	CXCR2_Down
205661_s_at	7.53e-08	1.65e-09	6.32475	11.3088	1.1235	FLAD1	flavin adenine dinucleotide synthetase 1	Up	FLAD1_Up
202589_at	7.75e-08	1.7e-09	6.31899	11.2789	2.04193	TYMS	thymidylate synthetase	Up	TYMS_Up
224632_at	7.77e-08	1.71e-09	6.31835	11.2756	1.16339	GPATCH4	G-patch domain containing 4	Up	GPATCH4_Up
233604_at	7.84e-08	1.73e-09	-6.31626	11.2647	-2.70588	FLJ22763	uncharacterized LOC401081	Down	FLJ22763_Down
209712_at	8.11e-08	1.8e-09	-6.3088	11.226	-1.08677	SLC35D1	solute carrier family 35 member D1	Down	SLC35D1_Down
228325_at	8.3e-08	1.84e-09	-6.30408	11.2015	-2.04439	SPIDR	scaffolding protein involved in DNA repair	Down	SPIDR_Down
228468_at	8.33e-08	1.85e-09	6.30315	11.1967	1.17987	MASTL	microtubule associated serine/threonine kinase like	Up	MASTL_Up
227179_at	8.56e-08	1.91e-09	6.29775	11.1687	1.28683	STAU2	staufen double-stranded RNA binding protein 2	Up	STAU2_Up
235158_at	8.62e-08	1.92e-09	6.2961	11.1601	1.12648	TMEM209	transmembrane protein 209	Up	TMEM209_Up
208034_s_at	8.64e-08	1.93e-09	-6.29516	11.1553	-1.81353	PROZ	protein Z, vitamin K dependent plasma glycoprotein	Down	PROZ_Down
208813_at	8.77e-08	1.97e-09	-6.29188	11.1383	-1.52034	GOT1	glutamic-oxaloacetic transaminase 1	Down	GOT1_Down
218434_s_at	8.82e-08	1.98e-09	6.29038	11.1305	1.21162	AACS	acetoacetyl-CoA synthetase	Up	AACS_Up
204141_at	8.83e-08	1.99e-09	6.29	11.1285	1.41599	TUBB2A	tubulin beta 2A class IIa	Up	TUBB2A_Up
214663_at	8.84e-08	1.99e-09	6.28953	11.1261	1.18548	DSTYK	dual serine/threonine and tyrosine protein kinase	Up	DSTYK_Up
215563_s_at	8.88e-08	2.01e-09	-6.28825	11.1195	-1.41851	MST1L	macrophage stimulating 1 like	Down	MST1L_Down
44783_s_at	9.08e-08	2.06e-09	6.28362	11.0955	1.48585	HEY1	hes related family bHLH transcription factor with YRPW motif 1	Up	HEY1_Up
1555278_a_at	9.27e-08	2.11e-09	6.27899	11.0715	1.08716	CKAP5	cytoskeleton associated protein 5	Up	CKAP5_Up
222121_at	9.52e-08	2.17e-09	-6.27373	11.0443	-1.21893	ARHGEF26	Rho guanine nucleotide exchange factor 26	Down	ARHGEF26_Down
207626_s_at	9.66e-08	2.21e-09	-6.27032	11.0267	-1.58031	SLC7A2	solute carrier family 7 member 2	Down	SLC7A2_Down
212193_s_at	9.89e-08	2.28e-09	6.26485	10.9985	1.14082	LARP1	La ribonucleoprotein domain family member 1	Up	LARP1_Up
225295_at	9.91e-08	2.28e-09	6.26417	10.9949	1.93438	SLC39A10	solute carrier family 39 member 10	Up	SLC39A10_Up
221521_s_at	1.03e-07	2.4e-09	6.25509	10.9481	1.26263	GINS2	GINS complex subunit 2	Up	GINS2_Up
214142_at	1.04e-07	2.41e-09	-6.25373	10.9411	-2.05189	ZG16	zymogen granule protein 16	Down	ZG16_Down
225540_at	1.05e-07	2.45e-09	6.25129	10.9284	2.86519	MAP2	microtubule associated protein 2	Up	MAP2_Up
201044_x_at	1.05e-07	2.45e-09	-6.25089	10.9264	-1.87514	DUSP1	dual specificity phosphatase 1	Down	DUSP1_Down
213820_s_at	1.06e-07	2.48e-09	-6.24849	10.914	-1.24715	STARD5	StAR related lipid transfer domain containing 5	Down	STARD5_Down
213528_at	1.08e-07	2.52e-09	6.24596	10.901	1.09606	METTL18	methyltransferase like 18	Up	METTL18_Up
209785_s_at	1.1e-07	2.6e-09	6.23969	10.8687	1.9529	PLA2G4C	phospholipase A2 group IVC	Up	PLA2G4C_Up
243296_at	1.13e-07	2.68e-09	-6.23425	10.8407	-2.5157	NAMPT	nicotinamide phosphoribosyltransferase	Down	NAMPT_Down
205194_at	1.14e-07	2.7e-09	6.23255	10.8319	1.83177	PSPH	phosphoserine phosphatase	Up	PSPH_Up
209116_x_at	1.15e-07	2.73e-09	-6.23049	10.8213	-2.42188	HBB	hemoglobin subunit beta	Down	HBB_Down
235737_at	1.23e-07	2.94e-09	-6.21665	10.7501	-2.25208	TSLP	thymic stromal lymphopoietin	Down	TSLP_Down
207469_s_at	1.24e-07	2.98e-09	6.21447	10.7389	1.86951	PIR	pirin	Up	PIR_Up
212677_s_at	1.26e-07	3.02e-09	6.21196	10.726	1.10191	CEP68	centrosomal protein 68	Up	CEP68_Up
206550_s_at	1.26e-07	3.03e-09	6.21128	10.7225	1.17589	NUP155	nucleoporin 155	Up	NUP155_Up
224320_s_at	1.28e-07	3.09e-09	6.20754	10.7033	1.55041	MCM8	minichromosome maintenance 8 homologous recombination repair factor	Up	MCM8_Up
215450_at	1.29e-07	3.11e-09	6.20615	10.6962	1.13894	SNRPE	small nuclear ribonucleoprotein polypeptide E	Up	SNRPE_Up
201202_at	1.3e-07	3.16e-09	6.20353	10.6828	1.15972	PCNA	proliferating cell nuclear antigen	Up	PCNA_Up
232366_at	1.31e-07	3.18e-09	6.20198	10.6748	1.18408	KIAA0232	KIAA0232	Up	KIAA0232_Up
202737_s_at	1.32e-07	3.21e-09	6.20026	10.666	1.09369	LSM4	LSM4 homolog, U6 small nuclear RNA and mRNA degradation associated	Up	LSM4_Up
208975_s_at	1.35e-07	3.3e-09	6.1954	10.6411	1.081	KPNB1	karyopherin subunit beta 1	Up	KPNB1_Up
209044_x_at	1.35e-07	3.31e-09	6.19448	10.6363	1.11813	SF3B4	splicing factor 3b subunit 4	Up	SF3B4_Up
222752_s_at	1.4e-07	3.44e-09	6.18758	10.601	1.31022	TMEM206	transmembrane protein 206	Up	TMEM206_Up
210983_s_at	1.4e-07	3.44e-09	6.18753	10.6007	1.41811	MCM7	minichromosome maintenance complex component 7	Up	MCM7_Up
222606_at	1.45e-07	3.61e-09	6.17833	10.5536	1.21268	ZWILCH	zwilch kinetochore protein	Up	ZWILCH_Up
222825_at	1.46e-07	3.63e-09	6.17736	10.5486	1.38375	OTUD6B	OTU domain containing 6B	Up	OTUD6B_Up
227249_at	1.47e-07	3.65e-09	6.17601	10.5418	1.20983	NDE1	nudE neurodevelopment protein 1	Up	NDE1_Up
204720_s_at	1.47e-07	3.67e-09	6.17498	10.5365	2.41877	DNAJC6	DnaJ heat shock protein family (Hsp40) member C6	Up	DNAJC6_Up
206453_s_at	1.47e-07	3.68e-09	-6.17492	10.5362	-1.35581	NDRG2	NDRG family member 2	Down	NDRG2_Down
203155_at	1.48e-07	3.69e-09	6.17438	10.5334	1.01278	SETDB1	SET domain bifurcated 1	Up	SETDB1_Up
221572_s_at	1.48e-07	3.7e-09	6.17365	10.5297	1.11131	MIR6824///SLC26A6	microRNA 6824///solute carrier family 26 member 6	Up	MIR6824///SLC26A6_Up
216316_x_at	1.52e-07	3.79e-09	-6.16889	10.5053	-1.13717	GK6P	glycerol kinase 6 pseudogene	Down	GK6P_Down
203218_at	1.55e-07	3.89e-09	6.16443	10.4825	1.12025	MAPK9	mitogen-activated protein kinase 9	Up	MAPK9_Up
203773_x_at	1.61e-07	4.05e-09	6.1568	10.4436	1.61863	BLVRA	biliverdin reductase A	Up	BLVRA_Up
221522_at	1.61e-07	4.05e-09	6.15674	10.4433	1.18697	ANKRD27	ankyrin repeat domain 27	Up	ANKRD27_Up
219512_at	1.62e-07	4.08e-09	6.15505	10.4346	1.07086	DSN1	DSN1 homolog, MIS12 kinetochore complex component	Up	DSN1_Up
222233_s_at	1.66e-07	4.21e-09	6.14921	10.4048	1.2553	DCLRE1C	DNA cross-link repair 1C	Up	DCLRE1C_Up
205053_at	1.68e-07	4.27e-09	6.1466	10.3915	1.56435	PRIM1	primase (DNA) subunit 1	Up	PRIM1_Up
202469_s_at	1.69e-07	4.31e-09	6.1449	10.3828	1.03083	CPSF6	cleavage and polyadenylation specific factor 6	Up	CPSF6_Up
212371_at	1.81e-07	4.64e-09	6.13085	10.3113	1.09786	DESI2	desumoylating isopeptidase 2	Up	DESI2_Up
224753_at	1.81e-07	4.64e-09	6.13085	10.3113	1.35451	CDCA5	cell division cycle associated 5	Up	CDCA5_Up
1555175_a_at	1.81e-07	4.65e-09	-6.13069	10.3105	-2.26378	PBLD	phenazine biosynthesis like protein domain containing	Down	PBLD_Down
209053_s_at	1.86e-07	4.81e-09	6.12401	10.2765	1.2904	WHSC1	Wolf-Hirschhorn syndrome candidate 1	Up	WHSC1_Up
213056_at	1.87e-07	4.84e-09	-6.12279	10.2703	-1.29139	FRMD4B	FERM domain containing 4B	Down	FRMD4B_Down
227041_at	1.88e-07	4.86e-09	6.12206	10.2665	1.37348	SESTD1	SEC14 and spectrin domain containing 1	Up	SESTD1_Up
226962_at	1.9e-07	4.93e-09	6.11941	10.2531	1.33392	ZBTB41	zinc finger and BTB domain containing 41	Up	ZBTB41_Up
206082_at	1.9e-07	4.93e-09	6.11935	10.2528	1.76712	HCP5	HLA complex P5 (non-protein coding)	Up	HCP5_Up
209015_s_at	1.9e-07	4.94e-09	6.11891	10.2506	1.14172	DNAJB6	DnaJ heat shock protein family (Hsp40) member B6	Up	DNAJB6_Up
212185_x_at	1.91e-07	4.97e-09	-6.11772	10.2445	-2.08151	MT2A	metallothionein 2A	Down	MT2A_Down
235609_at	1.91e-07	4.98e-09	6.11745	10.2431	1.56747	BRIP1	BRCA1 interacting protein C-terminal helicase 1	Up	BRIP1_Up
203547_at	1.94e-07	5.09e-09	-6.11354	10.2232	-1.19987	CD4	CD4 molecule	Down	CD4_Down
206610_s_at	1.95e-07	5.11e-09	-6.11276	10.2193	-1.7939	F11	coagulation factor XI	Down	F11_Down
236217_at	1.95e-07	5.11e-09	-6.11259	10.2184	-1.27096	SLC31A1	solute carrier family 31 member 1	Down	SLC31A1_Down
1554271_a_at	1.96e-07	5.14e-09	6.11168	10.2138	1.43948	CENPL	centromere protein L	Up	CENPL_Up
223156_at	1.96e-07	5.16e-09	6.11083	10.2095	1.22672	MRPS23	mitochondrial ribosomal protein S23	Up	MRPS23_Up
227289_at	2.01e-07	5.3e-09	6.10569	10.1834	1.47027	PCDH17	protocadherin 17	Up	PCDH17_Up
205657_at	2.08e-07	5.52e-09	-6.09797	10.1442	-1.32256	HAAO	3-hydroxyanthranilate 3,4-dioxygenase	Down	HAAO_Down
207039_at	2.08e-07	5.54e-09	6.09721	10.1403	1.84666	CDKN2A	cyclin dependent kinase inhibitor 2A	Up	CDKN2A_Up
217319_x_at	2.09e-07	5.58e-09	-6.09591	10.1337	-2.91515	CYP4A22///CYP4A11	cytochrome P450 family 4 subfamily A member 22///cytochrome P450 family 4 subfamily A member 11	Down	CYP4A22///CYP4A11_Down
226628_at	2.15e-07	5.77e-09	6.08971	10.1023	1.03753	THOC2	THO complex 2	Up	THOC2_Up
218966_at	2.15e-07	5.77e-09	6.08944	10.1009	1.05451	MYO5C	myosin VC	Up	MYO5C_Up
205395_s_at	2.16e-07	5.8e-09	6.08854	10.0964	1.03973	MRE11A	MRE11 homolog A, double strand break repair nuclease	Up	MRE11A_Up
222622_at	2.17e-07	5.85e-09	6.08707	10.0889	1.02151	PGP	phosphoglycolate phosphatase	Up	PGP_Up
218726_at	2.25e-07	6.06e-09	6.0801	10.0536	1.34425	HJURP	Holliday junction recognition protein	Up	HJURP_Up
225228_at	2.35e-07	6.41e-09	6.06956	10.0003	1.07126	DRAM2	DNA damage regulated autophagy modulator 2	Up	DRAM2_Up
229060_at	2.37e-07	6.49e-09	-6.06726	9.98871	-1.27445	YPEL2	yippee like 2	Down	YPEL2_Down
223642_at	2.38e-07	6.51e-09	6.06667	9.98573	2.49381	ZIC2	Zic family member 2	Up	ZIC2_Up
202968_s_at	2.44e-07	6.73e-09	6.06034	9.95372	1.01209	DYRK2	dual specificity tyrosine phosphorylation regulated kinase 2	Up	DYRK2_Up
220801_s_at	2.48e-07	6.84e-09	-6.05723	9.93803	-3.14529	HAO2	hydroxyacid oxidase 2	Down	HAO2_Down
200879_s_at	2.51e-07	6.94e-09	-6.05447	9.92409	-1.12048	EPAS1	endothelial PAS domain protein 1	Down	EPAS1_Down
201664_at	2.57e-07	7.12e-09	6.04942	9.89862	1.25686	SMC4	structural maintenance of chromosomes 4	Up	SMC4_Up
224839_s_at	2.61e-07	7.25e-09	-6.04607	9.88169	-1.84153	GPT2	glutamic--pyruvic transaminase 2	Down	GPT2_Down
201579_at	2.69e-07	7.49e-09	6.03995	9.85088	1.60719	FAT1	FAT atypical cadherin 1	Up	FAT1_Up
206680_at	2.69e-07	7.49e-09	-6.03979	9.85003	-1.87887	CD5L	CD5 molecule like	Down	CD5L_Down
204962_s_at	2.73e-07	7.62e-09	6.0365	9.83345	2.01797	SLC35F6///CENPA	solute carrier family 35 member F6///centromere protein A	Up	SLC35F6///CENPA_Up
226517_at	2.77e-07	7.74e-09	6.03346	9.81815	2.08966	BCAT1	branched chain amino acid transaminase 1	Up	BCAT1_Up
219007_at	2.77e-07	7.75e-09	6.03329	9.81729	1.10346	NUP43	nucleoporin 43	Up	NUP43_Up
205998_x_at	2.86e-07	8.04e-09	-6.02639	9.78255	-2.80576	CYP3A4	cytochrome P450 family 3 subfamily A member 4	Down	CYP3A4_Down
221188_s_at	2.95e-07	8.35e-09	-6.0191	9.74588	-1.77217	CIDEB	cell death-inducing DFFA-like effector b	Down	CIDEB_Down
210328_at	2.97e-07	8.4e-09	-6.01796	9.74016	-3.26174	GNMT	glycine N-methyltransferase	Down	GNMT_Down
213006_at	3.01e-07	8.53e-09	-6.01492	9.72487	-2.07329	CEBPD	CCAAT/enhancer binding protein delta	Down	CEBPD_Down
1557924_s_at	3.04e-07	8.63e-09	-6.0127	9.71374	-1.10042	ALPL	alkaline phosphatase, liver/bone/kidney	Down	ALPL_Down
219004_s_at	3.04e-07	8.64e-09	6.01256	9.71302	1.08801	MIS18A	MIS18 kinetochore protein A	Up	MIS18A_Up
228106_at	3.07e-07	8.72e-09	6.0107	9.7037	1.31779	DCAF16	DDB1 and CUL4 associated factor 16	Up	DCAF16_Up
209825_s_at	3.08e-07	8.77e-09	6.00956	9.69798	1.21809	MIR3658///UCK2	microRNA 3658///uridine-cytidine kinase 2	Up	MIR3658///UCK2_Up
239231_at	3.1e-07	8.83e-09	6.00842	9.69225	1.11138	ZNF101	zinc finger protein 101	Up	ZNF101_Up
218187_s_at	3.16e-07	9.06e-09	6.0035	9.66752	1.43928	C8orf33	chromosome 8 open reading frame 33	Up	C8orf33_Up
223702_x_at	3.18e-07	9.15e-09	-6.00152	9.65764	-1.90562	FTCD	formimidoyltransferase cyclodeaminase	Down	FTCD_Down
1553341_at	3.21e-07	9.23e-09	-5.9998	9.64898	-1.1487	UROC1	urocanate hydratase 1	Down	UROC1_Down
221884_at	3.36e-07	9.72e-09	5.98996	9.59964	1.45275	MECOM	MDS1 and EVI1 complex locus	Up	MECOM_Up
227804_at	3.37e-07	9.75e-09	5.98923	9.59601	1.12082	TLCD1	TLC domain containing 1	Up	TLCD1_Up
235349_at	3.38e-07	9.78e-09	-5.98872	9.59345	-1.32286	RMDN2	regulator of microtubule dynamics 2	Down	RMDN2_Down
227761_at	3.38e-07	9.79e-09	5.98858	9.59272	1.48122	MYO5A	myosin VA	Up	MYO5A_Up
231559_at	3.65e-07	1.07e-08	-5.9717	9.50823	-1.2972	NNMT	nicotinamide N-methyltransferase	Down	NNMT_Down
224722_at	3.65e-07	1.07e-08	5.97168	9.50814	1.05987	MIB1	mindbomb E3 ubiquitin protein ligase 1	Up	MIB1_Up
204039_at	3.73e-07	1.1e-08	5.96678	9.48366	1.51804	CEBPA	CCAAT/enhancer binding protein alpha	Up	CEBPA_Up
223700_at	3.75e-07	1.11e-08	5.96522	9.47586	1.4124	MND1	meiotic nuclear divisions 1	Up	MND1_Up
205807_s_at	3.76e-07	1.11e-08	5.96421	9.47083	1.34557	TUFT1	tuftelin 1	Up	TUFT1_Up
206354_at	3.76e-07	1.11e-08	-5.96406	9.47009	-4.12415	SLCO1B3	solute carrier organic anion transporter family member 1B3	Down	SLCO1B3_Down
224791_at	3.82e-07	1.13e-08	5.96031	9.45136	1.3871	ASAP1	ArfGAP with SH3 domain, ankyrin repeat and PH domain 1	Up	ASAP1_Up
206364_at	3.98e-07	1.19e-08	5.95148	9.40726	1.55245	KIF14	kinesin family member 14	Up	KIF14_Up
209237_s_at	4e-07	1.19e-08	-5.95031	9.40142	-1.09973	SLC23A2	solute carrier family 23 member 2	Down	SLC23A2_Down
227896_at	4.04e-07	1.21e-08	5.94792	9.38953	1.11807	BCCIP	BRCA2 and CDKN1A interacting protein	Up	BCCIP_Up
242283_at	4.05e-07	1.21e-08	5.94752	9.38751	1.20572	DNAH14	dynein axonemal heavy chain 14	Up	DNAH14_Up
207255_at	4.06e-07	1.22e-08	-5.94689	9.3844	-1.90508	LEPROT///LEPR	leptin receptor overlapping transcript///leptin receptor	Down	LEPROT///LEPR_Down
203196_at	4.12e-07	1.23e-08	5.94384	9.36917	1.9343	ABCC4	ATP binding cassette subfamily C member 4	Up	ABCC4_Up
222958_s_at	4.17e-07	1.25e-08	5.94073	9.35368	1.842	DEPDC1	DEP domain containing 1	Up	DEPDC1_Up
213088_s_at	4.61e-07	1.4e-08	5.91996	9.25033	1.09008	DNAJC9	DnaJ heat shock protein family (Hsp40) member C9	Up	DNAJC9_Up
220770_s_at	4.68e-07	1.42e-08	5.91688	9.23503	1.15676	ZBED8	zinc finger BED-type containing 8	Up	ZBED8_Up
221923_s_at	4.72e-07	1.43e-08	5.91477	9.2245	1.08404	NPM1	nucleophosmin	Up	NPM1_Up
227295_at	4.76e-07	1.45e-08	5.91294	9.21545	1.36175	IKBIP	IKBKB interacting protein	Up	IKBIP_Up
228397_at	4.8e-07	1.47e-08	5.91066	9.20412	1.34573	TUG1	taurine up-regulated 1 (non-protein coding)	Up	TUG1_Up
200731_s_at	4.9e-07	1.5e-08	-5.9061	9.18148	-1.03737	PTP4A1	protein tyrosine phosphatase type IVA, member 1	Down	PTP4A1_Down
202422_s_at	4.94e-07	1.52e-08	5.90376	9.16987	3.40253	ACSL4	acyl-CoA synthetase long-chain family member 4	Up	ACSL4_Up
228069_at	4.98e-07	1.53e-08	5.90219	9.16207	1.60851	MTFR2	mitochondrial fission regulator 2	Up	MTFR2_Up
225203_at	5e-07	1.54e-08	5.9013	9.15769	1.27385	PPP1R16A	protein phosphatase 1 regulatory subunit 16A	Up	PPP1R16A_Up
225573_at	5.29e-07	1.64e-08	-5.88858	9.09463	-1.45812	NPHP3-ACAD11///ACAD11///NPHP3	NPHP3-ACAD11 readthrough (NMD candidate)///acyl-CoA dehydrogenase family member 11///nephronophthisis 3 (adolescent)	Down	NPHP3-ACAD11///ACAD11///NPHP3_Down
204639_at	5.6e-07	1.77e-08	5.87448	9.0249	1.20209	ADA	adenosine deaminase	Up	ADA_Up
212247_at	5.67e-07	1.8e-08	5.87074	9.00639	1.02937	NUP205	nucleoporin 205	Up	NUP205_Up
225362_at	5.68e-07	1.81e-08	5.86995	9.00247	1.0248	FAM122B	family with sequence similarity 122B	Up	FAM122B_Up
203830_at	5.69e-07	1.81e-08	5.86946	9.00006	1.02275	C17orf75	chromosome 17 open reading frame 75	Up	C17orf75_Up
204352_at	5.74e-07	1.83e-08	5.86703	8.98807	1.65566	TRAF5	TNF receptor associated factor 5	Up	TRAF5_Up
1553962_s_at	5.85e-07	1.88e-08	-5.86275	8.9669	-1.87472	RHOB	ras homolog family member B	Down	RHOB_Down
218251_at	5.9e-07	1.9e-08	5.86048	8.95574	1.33148	MID1IP1	MID1 interacting protein 1	Up	MID1IP1_Up
227077_at	6.01e-07	1.94e-08	5.85599	8.93358	1.01063	ZNF286B///ZNF286A	zinc finger protein 286B///zinc finger protein 286A	Up	ZNF286B///ZNF286A_Up
220755_s_at	6.22e-07	2.03e-08	5.84777	8.89304	1.01146	C6orf48	chromosome 6 open reading frame 48	Up	C6orf48_Up
204244_s_at	6.22e-07	2.03e-08	5.84754	8.89192	1.34865	DBF4	DBF4 zinc finger	Up	DBF4_Up
210764_s_at	6.22e-07	2.03e-08	-5.84728	8.89061	-1.97891	CYR61	cysteine rich angiogenic inducer 61	Down	CYR61_Down
223381_at	6.22e-07	2.03e-08	5.84713	8.88987	2.17714	NUF2	NUF2, NDC80 kinetochore complex component	Up	NUF2_Up
211922_s_at	6.26e-07	2.05e-08	-5.84541	8.88143	-1.393	CAT	catalase	Down	CAT_Down
202382_s_at	6.71e-07	2.21e-08	5.83051	8.80808	1.04178	GNPDA1	glucosamine-6-phosphate deaminase 1	Up	GNPDA1_Up
225278_at	6.77e-07	2.23e-08	5.82878	8.79957	1.25256	PRKAB2	protein kinase AMP-activated non-catalytic subunit beta 2	Up	PRKAB2_Up
204444_at	6.78e-07	2.24e-08	5.82844	8.79789	1.86972	KIF11	kinesin family member 11	Up	KIF11_Up
240110_at	6.78e-07	2.24e-08	-5.8281	8.79625	-1.87242	HMGCS2	3-hydroxy-3-methylglutaryl-CoA synthase 2	Down	HMGCS2_Down
201275_at	6.92e-07	2.29e-08	5.82366	8.7744	1.37584	FDPS	farnesyl diphosphate synthase	Up	FDPS_Up
204533_at	6.92e-07	2.29e-08	5.82348	8.77352	2.54479	CXCL10	C-X-C motif chemokine ligand 10	Up	CXCL10_Up
227865_at	7.11e-07	2.37e-08	-5.81745	8.74393	-1.11028	IDNK	IDNK, gluconokinase	Down	IDNK_Down
207041_at	7.26e-07	2.42e-08	-5.81295	8.72182	-2.2538	MASP2	mannan binding lectin serine peptidase 2	Down	MASP2_Down
205531_s_at	7.28e-07	2.43e-08	-5.81217	8.71801	-3.158	GLS2	glutaminase 2	Down	GLS2_Down
219192_at	7.67e-07	2.58e-08	5.80009	8.65874	1.0627	UBAP2	ubiquitin associated protein 2	Up	UBAP2_Up
219990_at	7.95e-07	2.7e-08	5.7915	8.6167	1.68995	E2F8	E2F transcription factor 8	Up	E2F8_Up
213222_at	8.04e-07	2.73e-08	5.78906	8.60475	2.04965	PLCB1	phospholipase C beta 1	Up	PLCB1_Up
1553956_at	8.37e-07	2.87e-08	5.77923	8.55669	1.15307	TMEM237	transmembrane protein 237	Up	TMEM237_Up
223253_at	8.43e-07	2.9e-08	5.7775	8.54822	1.94916	EPDR1	ependymin related 1	Up	EPDR1_Up
213911_s_at	8.49e-07	2.93e-08	5.77572	8.53955	1.23837	H2AFZ	H2A histone family member Z	Up	H2AFZ_Up
206305_s_at	8.53e-07	2.94e-08	-5.7748	8.53505	-2.04391	C8A	complement component 8 alpha subunit	Down	C8A_Down
226943_at	8.63e-07	2.98e-08	5.77232	8.52294	1.1024	C12orf73	chromosome 12 open reading frame 73	Up	C12orf73_Up
218459_at	8.78e-07	3.04e-08	5.76831	8.50335	1.15356	TOR3A	torsin family 3 member A	Up	TOR3A_Up
221139_s_at	8.78e-07	3.04e-08	-5.76828	8.5032	-1.8396	CSAD	cysteine sulfinic acid decarboxylase	Down	CSAD_Down
215363_x_at	8.82e-07	3.06e-08	-5.76691	8.49651	-2.1009	FOLH1B///FOLH1	folate hydrolase 1B///folate hydrolase (prostate-specific membrane antigen) 1	Down	FOLH1B///FOLH1_Down
219588_s_at	8.88e-07	3.08e-08	5.76551	8.4897	1.27243	NCAPG2	non-SMC condensin II complex subunit G2	Up	NCAPG2_Up
218905_at	8.9e-07	3.09e-08	5.76496	8.48702	1.1391	INTS8	integrator complex subunit 8	Up	INTS8_Up
211458_s_at	9.01e-07	3.14e-08	-5.76196	8.47239	-1.62428	GABARAPL3///GABARAPL1	GABA type A receptor associated protein like 3 pseudogene///GABA type A receptor associated protein like 1	Down	GABARAPL3///GABARAPL1_Down
230120_s_at	9.04e-07	3.15e-08	-5.76135	8.46938	-2.35943	PLGLB1///PLGLB2	plasminogen-like B1///plasminogen-like B2	Down	PLGLB1///PLGLB2_Down
231835_at	9.18e-07	3.2e-08	5.75779	8.45202	1.31972	FAM213B	family with sequence similarity 213 member B	Up	FAM213B_Up
204103_at	9.25e-07	3.23e-08	-5.756	8.44333	-1.61079	CCL4	C-C motif chemokine ligand 4	Down	CCL4_Down
202679_at	9.49e-07	3.33e-08	5.75036	8.41586	1.13266	NPC1	NPC intracellular cholesterol transporter 1	Up	NPC1_Up
205813_s_at	9.57e-07	3.36e-08	-5.74826	8.40563	-1.65907	MAT1A	methionine adenosyltransferase 1A	Down	MAT1A_Down
225390_s_at	9.65e-07	3.4e-08	5.74599	8.39458	1.31312	KLF13	Kruppel like factor 13	Up	KLF13_Up
205114_s_at	9.84e-07	3.49e-08	-5.74114	8.37096	-1.6593	CCL3L3///CCL3L1///CCL3	C-C motif chemokine ligand 3 like 3///C-C motif chemokine ligand 3 like 1///C-C motif chemokine ligand 3	Down	CCL3L3///CCL3L1///CCL3_Down
204011_at	9.86e-07	3.5e-08	-5.74056	8.36816	-1.11047	SPRY2	sprouty RTK signaling antagonist 2	Down	SPRY2_Down
202241_at	9.94e-07	3.53e-08	-5.73866	8.35889	-1.32708	TRIB1	tribbles pseudokinase 1	Down	TRIB1_Down
209541_at	9.99e-07	3.55e-08	-5.73772	8.35432	-2.72107	IGF1	insulin like growth factor 1	Down	IGF1_Down
205854_at	1.01e-06	3.59e-08	5.73533	8.34271	1.05799	TULP3	tubby like protein 3	Up	TULP3_Up
208659_at	1.01e-06	3.6e-08	5.73497	8.34099	1.13078	CLIC1	chloride intracellular channel 1	Up	CLIC1_Up
225616_at	1.02e-06	3.63e-08	-5.73314	8.33207	-1.17745	SPRYD4	SPRY domain containing 4	Down	SPRYD4_Down
213243_at	1.02e-06	3.64e-08	5.73284	8.33063	1.10396	VPS13B	vacuolar protein sorting 13 homolog B	Up	VPS13B_Up
200872_at	1.02e-06	3.64e-08	5.73279	8.33038	1.28512	S100A10	S100 calcium binding protein A10	Up	S100A10_Up
218308_at	1.02e-06	3.66e-08	5.73172	8.32515	1.14717	TACC3	transforming acidic coiled-coil containing protein 3	Up	TACC3_Up
204170_s_at	1.02e-06	3.66e-08	5.73142	8.32372	1.68113	CKS2	CDC28 protein kinase regulatory subunit 2	Up	CKS2_Up
242626_at	1.03e-06	3.69e-08	-5.72982	8.31593	-1.85007	SAMD5	sterile alpha motif domain containing 5	Down	SAMD5_Down
222476_at	1.03e-06	3.7e-08	5.72942	8.31402	1.12391	CNOT6	CCR4-NOT transcription complex subunit 6	Up	CNOT6_Up
210739_x_at	1.07e-06	3.84e-08	-5.72187	8.27733	-1.10351	SLC4A4	solute carrier family 4 member 4	Down	SLC4A4_Down
239380_at	1.08e-06	3.91e-08	-5.7184	8.26049	-3.23307	LINC01554	long intergenic non-protein coding RNA 1554	Down	LINC01554_Down
212949_at	1.09e-06	3.93e-08	5.71727	8.25505	1.02691	NCAPH	non-SMC condensin I complex subunit H	Up	NCAPH_Up
221563_at	1.11e-06	4.01e-08	-5.71351	8.23681	-1.27866	DUSP10	dual specificity phosphatase 10	Down	DUSP10_Down
219934_s_at	1.12e-06	4.06e-08	-5.711	8.22462	-2.37383	SULT1E1	sulfotransferase family 1E member 1	Down	SULT1E1_Down
200999_s_at	1.17e-06	4.27e-08	5.70092	8.17581	1.26332	CKAP4	cytoskeleton associated protein 4	Up	CKAP4_Up
232195_at	1.2e-06	4.4e-08	5.69497	8.14701	1.86519	GPR158	G protein-coupled receptor 158	Up	GPR158_Up
202068_s_at	1.24e-06	4.57e-08	-5.6874	8.11043	-1.37228	LDLR	low density lipoprotein receptor	Down	LDLR_Down
213316_at	1.25e-06	4.61e-08	5.68596	8.10349	1.38375	KIAA1462	KIAA1462	Up	KIAA1462_Up
238441_at	1.27e-06	4.67e-08	5.68303	8.08931	2.46306	PRKAA2	protein kinase AMP-activated catalytic subunit alpha 2	Up	PRKAA2_Up
201760_s_at	1.28e-06	4.71e-08	5.68163	8.08258	1.06184	WSB2	WD repeat and SOCS box containing 2	Up	WSB2_Up
1557411_s_at	1.28e-06	4.71e-08	5.68152	8.08206	1.38082	SLC25A43	solute carrier family 25 member 43	Up	SLC25A43_Up
221538_s_at	1.28e-06	4.72e-08	5.68128	8.08088	1.33036	PLXNA1	plexin A1	Up	PLXNA1_Up
219281_at	1.28e-06	4.75e-08	-5.67966	8.07305	-1.25449	MSRA	methionine sulfoxide reductase A	Down	MSRA_Down
226715_at	1.3e-06	4.8e-08	5.6777	8.06359	1.18268	FOXK1	forkhead box K1	Up	FOXK1_Up
219954_s_at	1.33e-06	4.96e-08	-5.67139	8.03316	-2.88672	GBA3	glucosylceramidase beta 3 (gene/pseudogene)	Down	GBA3_Down
229074_at	1.33e-06	4.96e-08	5.67114	8.03195	1.03342	EHD4	EH domain containing 4	Up	EHD4_Up
1555888_at	1.34e-06	4.98e-08	5.6706	8.02936	1.10372	UBR5-AS1	UBR5 antisense RNA 1	Up	UBR5-AS1_Up
223677_at	1.4e-06	5.24e-08	5.66021	7.97929	1.0399	ATG10	autophagy related 10	Up	ATG10_Up
206188_at	1.41e-06	5.28e-08	5.65862	7.97165	1.12127	ZNF623	zinc finger protein 623	Up	ZNF623_Up
202580_x_at	1.42e-06	5.36e-08	5.65577	7.9579	1.56585	FOXM1	forkhead box M1	Up	FOXM1_Up
227167_s_at	1.42e-06	5.37e-08	5.6555	7.95661	1.53317	RASSF3	Ras association domain family member 3	Up	RASSF3_Up
218501_at	1.44e-06	5.45e-08	5.65265	7.94288	1.52012	ARHGEF3	Rho guanine nucleotide exchange factor 3	Up	ARHGEF3_Up
200832_s_at	1.46e-06	5.53e-08	5.64957	7.92808	1.8141	SCD	stearoyl-CoA desaturase	Up	SCD_Up
201465_s_at	1.48e-06	5.67e-08	-5.6447	7.90466	-1.14862	JUN	Jun proto-oncogene, AP-1 transcription factor subunit	Down	JUN_Down
206898_at	1.48e-06	5.67e-08	-5.64447	7.90356	-1.93735	CDH19	cadherin 19	Down	CDH19_Down
225325_at	1.49e-06	5.68e-08	5.64412	7.90191	1.60703	MFSD6	major facilitator superfamily domain containing 6	Up	MFSD6_Up
204173_at	1.5e-06	5.76e-08	5.64144	7.88903	1.03133	MYL6B	myosin light chain 6B	Up	MYL6B_Up
225921_at	1.52e-06	5.82e-08	5.63949	7.87964	1.02282	NIN	ninein	Up	NIN_Up
235931_at	1.52e-06	5.83e-08	5.63916	7.87805	1.03839	METTL21A	methyltransferase like 21A	Up	METTL21A_Up
218229_s_at	1.52e-06	5.83e-08	5.63884	7.87651	1.02112	POGK	pogo transposable element with KRAB domain	Up	POGK_Up
201397_at	1.52e-06	5.84e-08	-5.63865	7.8756	-1.62715	PHGDH	phosphoglycerate dehydrogenase	Down	PHGDH_Down
201425_at	1.52e-06	5.85e-08	-5.63819	7.87341	-1.13762	ALDH2	aldehyde dehydrogenase 2 family (mitochondrial)	Down	ALDH2_Down
1553099_at	1.52e-06	5.86e-08	5.63808	7.87287	1.37007	TIGD1	tigger transposable element derived 1	Up	TIGD1_Up
208016_s_at	1.53e-06	5.89e-08	-5.63704	7.86789	-1.52119	AGTR1	angiotensin II receptor type 1	Down	AGTR1_Down
226649_at	1.54e-06	5.92e-08	-5.63583	7.86207	-1.5643	PANK1	pantothenate kinase 1	Down	PANK1_Down
207620_s_at	1.57e-06	6.06e-08	5.63118	7.83978	1.11997	CASK	calcium/calmodulin dependent serine protein kinase	Up	CASK_Up
200885_at	1.59e-06	6.15e-08	5.6282	7.82547	1.12183	RHOC	ras homolog family member C	Up	RHOC_Up
224233_s_at	1.6e-06	6.19e-08	5.62702	7.81979	1.01623	MSTO1	misato 1, mitochondrial distribution and morphology regulator	Up	MSTO1_Up
212922_s_at	1.64e-06	6.39e-08	5.6205	7.78857	1.08287	SMYD2	SET and MYND domain containing 2	Up	SMYD2_Up
204510_at	1.66e-06	6.45e-08	5.61877	7.78026	1.54475	CDC7	cell division cycle 7	Up	CDC7_Up
213002_at	1.73e-06	6.82e-08	5.60772	7.72737	1.32948	MARCKS	myristoylated alanine rich protein kinase C substrate	Up	MARCKS_Up
204121_at	1.75e-06	6.87e-08	-5.60603	7.71931	-1.70496	GADD45G	growth arrest and DNA damage inducible gamma	Down	GADD45G_Down
205406_s_at	1.78e-06	7.05e-08	5.60101	7.69529	1.13707	SPA17	sperm autoantigenic protein 17	Up	SPA17_Up
223217_s_at	1.83e-06	7.22e-08	-5.59609	7.67179	-1.46073	NFKBIZ	NFKB inhibitor zeta	Down	NFKBIZ_Down
1552280_at	1.85e-06	7.33e-08	-5.59317	7.65787	-1.37931	TIMD4	T-cell immunoglobulin and mucin domain containing 4	Down	TIMD4_Down
217014_s_at	1.88e-06	7.46e-08	-5.58951	7.64037	-1.94178	AZGP1P1///AZGP1	alpha-2-glycoprotein 1, zinc-binding pseudogene 1///alpha-2-glycoprotein 1, zinc-binding	Down	AZGP1P1///AZGP1_Down
239930_at	1.92e-06	7.64e-08	-5.58469	7.61736	-1.51724	GALNT2	polypeptide N-acetylgalactosaminyltransferase 2	Down	GALNT2_Down
226282_at	1.94e-06	7.76e-08	5.58166	7.60293	1.48457	PTPN14	protein tyrosine phosphatase, non-receptor type 14	Up	PTPN14_Up
209642_at	1.96e-06	7.86e-08	5.57898	7.59017	1.97123	BUB1	BUB1 mitotic checkpoint serine/threonine kinase	Up	BUB1_Up
202770_s_at	1.96e-06	7.88e-08	5.57848	7.58778	1.15171	CCNG2	cyclin G2	Up	CCNG2_Up
229777_at	1.97e-06	7.94e-08	-5.57708	7.5811	-3.21782	CLRN3	clarin 3	Down	CLRN3_Down
204944_at	2.05e-06	8.31e-08	5.56781	7.53696	1.38878	PTPRG	protein tyrosine phosphatase, receptor type G	Up	PTPRG_Up
225273_at	2.09e-06	8.48e-08	5.56388	7.51828	1.04824	WWC3	WWC family member 3	Up	WWC3_Up
209368_at	2.11e-06	8.59e-08	-5.56118	7.50546	-1.74709	EPHX2	epoxide hydrolase 2	Down	EPHX2_Down
206247_at	2.12e-06	8.64e-08	5.55995	7.49962	1.51504	MICB	MHC class I polypeptide-related sequence B	Up	MICB_Up
225297_at	2.14e-06	8.71e-08	5.55831	7.49178	1.11283	HAUS1	HAUS augmin like complex subunit 1	Up	HAUS1_Up
1555241_at	2.14e-06	8.75e-08	5.55736	7.4873	1.04829	C8orf59	chromosome 8 open reading frame 59	Up	C8orf59_Up
225212_at	2.15e-06	8.78e-08	-5.55666	7.48398	-1.333	SLC25A25	solute carrier family 25 member 25	Down	SLC25A25_Down
204438_at	2.15e-06	8.8e-08	-5.55635	7.4825	-1.86077	MRC1	mannose receptor, C type 1	Down	MRC1_Down
240830_at	2.18e-06	8.93e-08	-5.55338	7.4684	-1.37601	SCARNA17	small Cajal body-specific RNA 17	Down	SCARNA17_Down
231691_at	2.25e-06	9.28e-08	-5.54556	7.43126	-2.57215	C3P1	complement component 3 precursor pseudogene	Down	C3P1_Down
226545_at	2.29e-06	9.46e-08	5.54167	7.41279	2.45221	CD109	CD109 molecule	Up	CD109_Up
216958_s_at	2.36e-06	9.8e-08	-5.53459	7.37927	-1.03217	IVD	isovaleryl-CoA dehydrogenase	Down	IVD_Down
210052_s_at	2.39e-06	9.9e-08	5.5324	7.36888	1.61564	TPX2	TPX2, microtubule nucleation factor	Up	TPX2_Up
204597_x_at	2.4e-06	9.97e-08	5.53105	7.36249	1.72088	STC1	stanniocalcin 1	Up	STC1_Up
226421_at	2.42e-06	1e-07	5.52965	7.35587	1.07255	AMMECR1	Alport syndrome, mental retardation, midface hypoplasia and elliptocytosis chromosomal region gene 1	Up	AMMECR1_Up
203087_s_at	2.42e-06	1.01e-07	5.52884	7.35199	1.32204	KIF2A	kinesin family member 2A	Up	KIF2A_Up
226050_at	2.42e-06	1.01e-07	5.52823	7.34915	1.59201	TMCO3	transmembrane and coiled-coil domains 3	Up	TMCO3_Up
218594_at	2.43e-06	1.01e-07	5.52756	7.34595	1.00247	HEATR1	HEAT repeat containing 1	Up	HEATR1_Up
221868_at	2.44e-06	1.02e-07	-5.52586	7.3379	-1.48317	PAIP2B	poly(A) binding protein interacting protein 2B	Down	PAIP2B_Down
215506_s_at	2.47e-06	1.04e-07	-5.52335	7.32602	-1.50538	DIRAS3	DIRAS family GTPase 3	Down	DIRAS3_Down
202647_s_at	2.47e-06	1.04e-07	5.52316	7.32515	1.17684	NRAS	neuroblastoma RAS viral oncogene homolog	Up	NRAS_Up
200916_at	2.48e-06	1.04e-07	5.52182	7.31881	1.04477	TAGLN2	transgelin 2	Up	TAGLN2_Up
202502_at	2.49e-06	1.05e-07	-5.52119	7.31584	-1.10062	ACADM	acyl-CoA dehydrogenase, C-4 to C-12 straight chain	Down	ACADM_Down
226109_at	2.52e-06	1.06e-07	-5.51843	7.30276	-1.18483	C21orf91	chromosome 21 open reading frame 91	Down	C21orf91_Down
225684_at	2.53e-06	1.07e-07	5.51661	7.29417	1.0066	SKA2	spindle and kinetochore associated complex subunit 2	Up	SKA2_Up
207718_x_at	2.54e-06	1.07e-07	-5.51624	7.29243	-2.42869	CYP2A7	cytochrome P450 family 2 subfamily A member 7	Down	CYP2A7_Down
228338_at	2.55e-06	1.08e-07	5.5151	7.28702	1.4172	COLCA2	colorectal cancer associated 2	Up	COLCA2_Up
224480_s_at	2.56e-06	1.09e-07	-5.51389	7.28129	-1.68956	GPAT3	glycerol-3-phosphate acyltransferase 3	Down	GPAT3_Down
230577_at	2.7e-06	1.16e-07	-5.50117	7.22125	-3.97639	LINC00844	long intergenic non-protein coding RNA 844	Down	LINC00844_Down
205042_at	2.8e-06	1.21e-07	-5.49256	7.18068	-1.36128	GNE	glucosamine (UDP-N-acetyl)-2-epimerase/N-acetylmannosamine kinase	Down	GNE_Down
219147_s_at	2.81e-06	1.21e-07	-5.49189	7.1775	-1.06086	NMRK1	nicotinamide riboside kinase 1	Down	NMRK1_Down
228293_at	2.85e-06	1.23e-07	-5.48803	7.15934	-1.75917	DEPDC7	DEP domain containing 7	Down	DEPDC7_Down
205433_at	2.92e-06	1.26e-07	-5.48308	7.13605	-3.00651	BCHE	butyrylcholinesterase	Down	BCHE_Down
201853_s_at	2.97e-06	1.29e-07	5.47864	7.11516	1.1617	CDC25B	cell division cycle 25B	Up	CDC25B_Up
208700_s_at	3.02e-06	1.31e-07	5.47496	7.09785	1.61638	TKT	transketolase	Up	TKT_Up
225806_at	3.03e-06	1.32e-07	5.47421	7.0943	1.34693	AJUBA	ajuba LIM protein	Up	AJUBA_Up
214512_s_at	3.06e-06	1.33e-07	5.47197	7.0838	1.07536	SUB1	SUB1 homolog, transcriptional regulator	Up	SUB1_Up
228728_at	3.07e-06	1.34e-07	-5.47081	7.07832	-1.86858	CPED1	cadherin like and PC-esterase domain containing 1	Down	CPED1_Down
203284_s_at	3.1e-06	1.36e-07	5.46844	7.0672	1.17411	HS2ST1	heparan sulfate 2-O-sulfotransferase 1	Up	HS2ST1_Up
224801_at	3.18e-06	1.39e-07	-5.46281	7.04077	-1.01283	NDFIP2	Nedd4 family interacting protein 2	Down	NDFIP2_Down
1555495_a_at	3.2e-06	1.41e-07	5.46124	7.03341	1.07663	CWC27	CWC27 spliceosome associated protein homolog	Up	CWC27_Up
219161_s_at	3.22e-06	1.42e-07	5.4593	7.0243	1.35339	CKLF-CMTM1///CKLF	CKLF-CMTM1 readthrough///chemokine like factor	Up	CKLF-CMTM1///CKLF_Up
221520_s_at	3.23e-06	1.42e-07	5.45875	7.02173	1.02693	CDCA8	cell division cycle associated 8	Up	CDCA8_Up
221935_s_at	3.27e-06	1.45e-07	5.45503	7.0043	1.18087	EOGT	EGF domain specific O-linked N-acetylglucosamine transferase	Up	EOGT_Up
223721_s_at	3.31e-06	1.47e-07	-5.45226	6.99131	-2.18568	DNAJC12	DnaJ heat shock protein family (Hsp40) member C12	Down	DNAJC12_Down
234980_at	3.34e-06	1.48e-07	-5.4506	6.98355	-1.23603	TMEM56	transmembrane protein 56	Down	TMEM56_Down
55872_at	3.35e-06	1.49e-07	5.44946	6.97818	1.19464	ZNF512B	zinc finger protein 512B	Up	ZNF512B_Up
229500_at	3.37e-06	1.5e-07	5.44799	6.9713	1.05853	SLC30A9	solute carrier family 30 member 9	Up	SLC30A9_Up
204318_s_at	3.38e-06	1.51e-07	5.4466	6.9648	1.78703	GTSE1	G2 and S-phase expressed 1	Up	GTSE1_Up
230109_at	3.39e-06	1.51e-07	-5.4464	6.96388	-1.08554	PDE7B	phosphodiesterase 7B	Down	PDE7B_Down
238066_at	3.42e-06	1.53e-07	5.44431	6.95406	1.4526	RBP7	retinol binding protein 7	Up	RBP7_Up
229050_s_at	3.43e-06	1.53e-07	5.44349	6.95024	1.04205	SNORA17B///SNORA17A///SNHG7	small nucleolar RNA, H/ACA box 17B///small nucleolar RNA, H/ACA box 17A///small nucleolar RNA host gene 7	Up	SNORA17B///SNORA17A///SNHG7_Up
242881_x_at	3.43e-06	1.53e-07	5.44338	6.94971	2.76925	DUXAP10	double homeobox A pseudogene 10	Up	DUXAP10_Up
206069_s_at	3.49e-06	1.56e-07	-5.43928	6.93053	-1.90571	ACADL	acyl-CoA dehydrogenase, long chain	Down	ACADL_Down
201473_at	3.49e-06	1.56e-07	-5.43927	6.93047	-1.29712	JUNB	JunB proto-oncogene, AP-1 transcription factor subunit	Down	JUNB_Down
222036_s_at	3.51e-06	1.58e-07	5.43736	6.92153	1.33269	MCM4	minichromosome maintenance complex component 4	Up	MCM4_Up
209278_s_at	3.61e-06	1.64e-07	-5.43017	6.88793	-1.70595	TFPI2	tissue factor pathway inhibitor 2	Down	TFPI2_Down
218979_at	3.68e-06	1.67e-07	5.42559	6.86654	1.00889	RMI1	RecQ mediated genome instability 1	Up	RMI1_Up
212067_s_at	3.72e-06	1.69e-07	-5.42302	6.85455	-1.56049	C1R	complement C1r subcomponent	Down	C1R_Down
209583_s_at	3.78e-06	1.73e-07	5.41909	6.83623	1.41913	CD200	CD200 molecule	Up	CD200_Up
219684_at	3.8e-06	1.74e-07	5.41763	6.82942	1.44454	RTP4	receptor transporter protein 4	Up	RTP4_Up
202651_at	3.8e-06	1.74e-07	5.41747	6.82866	1.13713	LPGAT1	lysophosphatidylglycerol acyltransferase 1	Up	LPGAT1_Up
218869_at	3.87e-06	1.77e-07	-5.41343	6.80981	-1.00229	MLYCD	malonyl-CoA decarboxylase	Down	MLYCD_Down
201897_s_at	3.9e-06	1.79e-07	5.41128	6.79979	1.22355	CKS1B	CDC28 protein kinase regulatory subunit 1B	Up	CKS1B_Up
219294_at	3.93e-06	1.81e-07	5.40916	6.78991	1.07894	CENPQ	centromere protein Q	Up	CENPQ_Up
202917_s_at	4.08e-06	1.89e-07	-5.40012	6.74785	-2.55974	S100A8	S100 calcium binding protein A8	Down	S100A8_Down
204955_at	4.09e-06	1.9e-07	-5.39946	6.74476	-2.14063	SRPX	sushi repeat containing protein, X-linked	Down	SRPX_Down
218816_at	4.1e-06	1.9e-07	5.39922	6.74365	1.98179	LRRC1	leucine rich repeat containing 1	Up	LRRC1_Up
228055_at	4.27e-06	2e-07	-5.38881	6.69526	-1.04467	NAPSB	napsin B aspartic peptidase, pseudogene	Down	NAPSB_Down
202202_s_at	4.65e-06	2.21e-07	5.36815	6.5994	1.32359	LAMA4	laminin subunit alpha 4	Up	LAMA4_Up
214948_s_at	4.66e-06	2.22e-07	5.36752	6.59647	1.1615	TMF1	TATA element modulatory factor 1	Up	TMF1_Up
231982_at	4.69e-06	2.24e-07	-5.36571	6.58809	-2.0463	SMIM24	small integral membrane protein 24	Down	SMIM24_Down
222750_s_at	4.83e-06	2.32e-07	5.35864	6.55536	1.01705	SRD5A3	steroid 5 alpha-reductase 3	Up	SRD5A3_Up
228648_at	4.86e-06	2.33e-07	-5.3575	6.5501	-1.68003	LRG1	leucine rich alpha-2-glycoprotein 1	Down	LRG1_Down
1566557_at	4.91e-06	2.36e-07	5.35447	6.53609	1.25654	BAIAP2-AS1	BAIAP2 antisense RNA 1 (head to head)	Up	BAIAP2-AS1_Up
241114_s_at	4.93e-06	2.37e-07	-5.35356	6.53188	-1.33571	ACAA2	acetyl-CoA acyltransferase 2	Down	ACAA2_Down
218783_at	4.95e-06	2.39e-07	5.35241	6.52656	1.13523	INTS7	integrator complex subunit 7	Up	INTS7_Up
201985_at	5.01e-06	2.43e-07	5.34886	6.51017	1.11746	KIAA0196	KIAA0196	Up	KIAA0196_Up
242702_at	5.07e-06	2.46e-07	-5.34626	6.49813	-1.19328	MMAA	methylmalonic aciduria (cobalamin deficiency) cblA type	Down	MMAA_Down
211761_s_at	5.14e-06	2.49e-07	5.34329	6.48445	1.02837	CACYBP	calcyclin binding protein	Up	CACYBP_Up
215966_x_at	5.14e-06	2.5e-07	-5.34291	6.48269	-1.20351	GK3P	glycerol kinase 3 pseudogene	Down	GK3P_Down
211074_at	5.2e-06	2.53e-07	-5.33985	6.46856	-1.18427	FOLR1	folate receptor 1	Down	FOLR1_Down
201266_at	5.3e-06	2.59e-07	5.33507	6.44652	1.5478	TXNRD1	thioredoxin reductase 1	Up	TXNRD1_Up
205730_s_at	5.49e-06	2.7e-07	-5.32684	6.40856	-1.24597	ABLIM3	actin binding LIM protein family member 3	Down	ABLIM3_Down
206754_s_at	5.51e-06	2.71e-07	-5.32603	6.40484	-2.63641	CYP2B7P///CYP2B6	cytochrome P450 family 2 subfamily B member 7, pseudogene///cytochrome P450 family 2 subfamily B member 6	Down	CYP2B7P///CYP2B6_Down
219555_s_at	5.72e-06	2.83e-07	5.31709	6.36371	1.24495	CENPN	centromere protein N	Up	CENPN_Up
206541_at	5.86e-06	2.91e-07	-5.31108	6.33608	-1.77039	KLKB1	kallikrein B1	Down	KLKB1_Down
203967_at	5.99e-06	2.99e-07	5.30578	6.3117	1.79782	CDC6	cell division cycle 6	Up	CDC6_Up
201471_s_at	6.06e-06	3.03e-07	5.30305	6.2992	1.10146	SQSTM1	sequestosome 1	Up	SQSTM1_Up
226844_at	6.07e-06	3.03e-07	5.30267	6.29743	1.40711	MOB3B	MOB kinase activator 3B	Up	MOB3B_Up
225060_at	6.11e-06	3.07e-07	5.30032	6.28664	1.15389	LRP11	LDL receptor related protein 11	Up	LRP11_Up
227614_at	6.21e-06	3.12e-07	5.29635	6.26845	2.16579	HKDC1	hexokinase domain containing 1	Up	HKDC1_Up
205498_at	6.39e-06	3.23e-07	-5.28935	6.23636	-2.37062	GHR	growth hormone receptor	Down	GHR_Down
206753_at	6.43e-06	3.26e-07	-5.28749	6.22784	-2.276	RDH16	retinol dehydrogenase 16 (all-trans)	Down	RDH16_Down
223451_s_at	6.47e-06	3.29e-07	5.28574	6.2198	1.06704	CKLF	chemokine like factor	Up	CKLF_Up
205541_s_at	6.49e-06	3.3e-07	-5.28495	6.2162	-2.30505	GSPT2	G1 to S phase transition 2	Down	GSPT2_Down
218788_s_at	6.49e-06	3.3e-07	5.2848	6.2155	1.34544	SMYD3	SET and MYND domain containing 3	Up	SMYD3_Up
202421_at	6.52e-06	3.32e-07	5.28377	6.21079	1.33895	IGSF3	immunoglobulin superfamily member 3	Up	IGSF3_Up
231790_at	6.55e-06	3.33e-07	-5.28283	6.2065	-2.05439	DMGDH	dimethylglycine dehydrogenase	Down	DMGDH_Down
235126_at	6.61e-06	3.37e-07	5.28029	6.19488	1.18331	FLVCR1-AS1	FLVCR1 antisense RNA 1 (head to head)	Up	FLVCR1-AS1_Up
205569_at	6.63e-06	3.38e-07	5.27968	6.1921	1.7104	LAMP3	lysosomal associated membrane protein 3	Up	LAMP3_Up
219037_at	6.76e-06	3.46e-07	5.27483	6.16988	1.0614	RRP15	ribosomal RNA processing 15 homolog	Up	RRP15_Up
220239_at	6.8e-06	3.49e-07	5.27348	6.16374	1.11334	KLHL7	kelch like family member 7	Up	KLHL7_Up
211470_s_at	6.82e-06	3.5e-07	5.27255	6.15947	3.25352	SULT1C2	sulfotransferase family 1C member 2	Up	SULT1C2_Up
1554547_at	6.83e-06	3.51e-07	5.27212	6.15749	1.11131	FAM13C	family with sequence similarity 13 member C	Up	FAM13C_Up
219313_at	6.89e-06	3.54e-07	-5.27023	6.14888	-1.69433	GRAMD1C	GRAM domain containing 1C	Down	GRAMD1C_Down
208694_at	6.97e-06	3.59e-07	5.26734	6.13566	1.17968	PRKDC	protein kinase, DNA-activated, catalytic polypeptide	Up	PRKDC_Up
202983_at	7.1e-06	3.66e-07	5.26339	6.11763	1.01156	HLTF	helicase like transcription factor	Up	HLTF_Up
203238_s_at	7.1e-06	3.66e-07	5.26333	6.11735	1.303	NOTCH3	notch 3	Up	NOTCH3_Up
222043_at	7.1e-06	3.66e-07	-5.26305	6.11609	-1.35377	CLU	clusterin	Down	CLU_Down
219258_at	7.14e-06	3.69e-07	5.26181	6.11039	1.18105	TIPIN	TIMELESS interacting protein	Up	TIPIN_Up
1555189_a_at	7.18e-06	3.71e-07	-5.26035	6.10374	-1.77663	TAT	tyrosine aminotransferase	Down	TAT_Down
210301_at	7.22e-06	3.74e-07	-5.25887	6.097	-1.37254	XDH	xanthine dehydrogenase	Down	XDH_Down
213125_at	7.28e-06	3.77e-07	5.2569	6.08803	1.05048	OLFML2B	olfactomedin like 2B	Up	OLFML2B_Up
229491_at	7.29e-06	3.78e-07	-5.25649	6.08615	-1.22633	SLC9B2	solute carrier family 9 member B2	Down	SLC9B2_Down
235155_at	7.31e-06	3.8e-07	-5.25556	6.08188	-1.00138	BDH2	3-hydroxybutyrate dehydrogenase, type 2	Down	BDH2_Down
206239_s_at	7.43e-06	3.87e-07	5.25151	6.06342	4.59872	SPINK1	serine peptidase inhibitor, Kazal type 1	Up	SPINK1_Up
207275_s_at	7.43e-06	3.87e-07	-5.25137	6.06279	-1.67287	ACSL1	acyl-CoA synthetase long-chain family member 1	Down	ACSL1_Down
208683_at	7.51e-06	3.92e-07	5.24884	6.05127	1.13234	CAPN2	calpain 2	Up	CAPN2_Up
206539_s_at	7.78e-06	4.07e-07	-5.24078	6.01457	-1.08799	CYP4F12	cytochrome P450 family 4 subfamily F member 12	Down	CYP4F12_Down
207244_x_at	8.04e-06	4.25e-07	-5.23183	5.97388	-2.41478	CYP2A6	cytochrome P450 family 2 subfamily A member 6	Down	CYP2A6_Down
202959_at	8.05e-06	4.26e-07	-5.2315	5.97238	-1.16554	MUT	methylmalonyl-CoA mutase	Down	MUT_Down
219602_s_at	8.17e-06	4.33e-07	5.22811	5.957	1.45013	PIEZO2	piezo type mechanosensitive ion channel component 2	Up	PIEZO2_Up
207621_s_at	8.28e-06	4.39e-07	-5.2249	5.9424	-1.22179	PEMT	phosphatidylethanolamine N-methyltransferase	Down	PEMT_Down
226337_at	8.3e-06	4.41e-07	5.22426	5.93948	1.17133	GORAB	golgin, RAB6 interacting	Up	GORAB_Up
223608_at	8.38e-06	4.46e-07	5.22184	5.92853	1.19044	EFCAB2	EF-hand calcium binding domain 2	Up	EFCAB2_Up
205034_at	8.44e-06	4.49e-07	5.22026	5.92133	1.76448	CCNE2	cyclin E2	Up	CCNE2_Up
213988_s_at	8.45e-06	4.5e-07	-5.21969	5.91878	-1.03342	SAT1	spermidine/spermine N1-acetyltransferase 1	Down	SAT1_Down
220773_s_at	8.45e-06	4.51e-07	-5.21947	5.91778	-1.28895	GPHN	gephyrin	Down	GPHN_Down
208078_s_at	8.87e-06	4.77e-07	-5.20771	5.86448	-1.66276	SIK1	salt inducible kinase 1	Down	SIK1_Down
206074_s_at	8.9e-06	4.78e-07	5.20696	5.86108	1.26569	HMGA1	high mobility group AT-hook 1	Up	HMGA1_Up
214621_at	9.04e-06	4.87e-07	-5.20329	5.84445	-3.00372	GYS2	glycogen synthase 2	Down	GYS2_Down
209891_at	9.34e-06	5.08e-07	5.19445	5.80448	1.41875	SPC25	SPC25, NDC80 kinetochore complex component	Up	SPC25_Up
202666_s_at	9.39e-06	5.11e-07	5.19306	5.79817	1.00289	ACTL6A	actin like 6A	Up	ACTL6A_Up
213186_at	9.48e-06	5.17e-07	5.19062	5.78718	1.01248	DZIP3	DAZ interacting zinc finger protein 3	Up	DZIP3_Up
228793_at	9.87e-06	5.42e-07	-5.18047	5.74135	-1.41372	JMJD1C	jumonji domain containing 1C	Down	JMJD1C_Down
206632_s_at	9.95e-06	5.48e-07	5.17828	5.73148	2.08744	APOBEC3B	apolipoprotein B mRNA editing enzyme catalytic subunit 3B	Up	APOBEC3B_Up
221558_s_at	1e-05	5.51e-07	5.17693	5.72539	1.9232	LEF1	lymphoid enhancer binding factor 1	Up	LEF1_Up
207201_s_at	1.01e-05	5.57e-07	-5.17465	5.71511	-3.74567	SLC22A1	solute carrier family 22 member 1	Down	SLC22A1_Down
217127_at	1.01e-05	5.58e-07	-5.17446	5.71423	-2.25877	CTH	cystathionine gamma-lyase	Down	CTH_Down
226534_at	1.02e-05	5.68e-07	5.17072	5.69739	1.40348	KITLG	KIT ligand	Up	KITLG_Up
210959_s_at	1.03e-05	5.7e-07	-5.16986	5.69351	-1.56593	SRD5A1	steroid 5 alpha-reductase 1	Down	SRD5A1_Down
213626_at	1.03e-05	5.73e-07	-5.16878	5.68866	-1.16428	CBR4	carbonyl reductase 4	Down	CBR4_Down
202635_s_at	1.03e-05	5.74e-07	5.16848	5.68733	1.03311	POLR2K	RNA polymerase II subunit K	Up	POLR2K_Up
212486_s_at	1.03e-05	5.74e-07	-5.16823	5.68618	-1.12759	FYN	FYN proto-oncogene, Src family tyrosine kinase	Down	FYN_Down
226350_at	1.04e-05	5.79e-07	5.16665	5.67909	1.97143	CHML	CHM like, Rab escort protein 2	Up	CHML_Up
217047_s_at	1.04e-05	5.8e-07	-5.16622	5.67712	-1.80787	FAM13A	family with sequence similarity 13 member A	Down	FAM13A_Down
1558549_s_at	1.04e-05	5.83e-07	-5.16511	5.67215	-2.48897	VNN1	vanin 1	Down	VNN1_Down
221677_s_at	1.05e-05	5.86e-07	5.1639	5.66671	1.1164	DONSON	downstream neighbor of SON	Up	DONSON_Up
208708_x_at	1.06e-05	5.92e-07	-5.16172	5.65689	-1.01048	EIF5	eukaryotic translation initiation factor 5	Down	EIF5_Down
218757_s_at	1.06e-05	5.95e-07	5.16078	5.65265	1.02367	UPF3B	UPF3 regulator of nonsense transcripts homolog B (yeast)	Up	UPF3B_Up
226980_at	1.07e-05	5.99e-07	5.15943	5.64658	1.69082	DEPDC1B	DEP domain containing 1B	Up	DEPDC1B_Up
209515_s_at	1.07e-05	6.05e-07	-5.15725	5.63681	-1.28505	RAB27A	RAB27A, member RAS oncogene family	Down	RAB27A_Down
222705_s_at	1.09e-05	6.14e-07	-5.15424	5.62327	-1.52303	SLC25A15	solute carrier family 25 member 15	Down	SLC25A15_Down
225919_s_at	1.1e-05	6.22e-07	-5.1512	5.60961	-1.10983	C9orf72	chromosome 9 open reading frame 72	Down	C9orf72_Down
221922_at	1.1e-05	6.25e-07	5.15044	5.6062	1.23486	GPSM2	G-protein signaling modulator 2	Up	GPSM2_Up
1554980_a_at	1.1e-05	6.25e-07	-5.15035	5.60579	-1.05867	ATF3	activating transcription factor 3	Down	ATF3_Down
214829_at	1.13e-05	6.44e-07	-5.14384	5.57658	-2.03891	AASS	aminoadipate-semialdehyde synthase	Down	AASS_Down
201743_at	1.19e-05	6.82e-07	-5.13165	5.52194	-1.57171	CD14	CD14 molecule	Down	CD14_Down
202786_at	1.19e-05	6.84e-07	5.13097	5.51889	2.10143	STK39	serine/threonine kinase 39	Up	STK39_Up
229241_at	1.23e-05	7.13e-07	-5.12212	5.47927	-1.33086	LDHD	lactate dehydrogenase D	Down	LDHD_Down
209628_at	1.24e-05	7.2e-07	5.12015	5.47049	1.01148	NXT2	nuclear transport factor 2 like export factor 2	Up	NXT2_Up
63825_at	1.25e-05	7.27e-07	-5.11798	5.46076	-1.19551	ABHD2	abhydrolase domain containing 2	Down	ABHD2_Down
201599_at	1.26e-05	7.34e-07	-5.11594	5.45164	-2.45422	OAT	ornithine aminotransferase	Down	OAT_Down
229229_at	1.27e-05	7.44e-07	-5.11317	5.4393	-1.75962	AGXT2	alanine--glyoxylate aminotransferase 2	Down	AGXT2_Down
205442_at	1.29e-05	7.55e-07	-5.10996	5.42496	-2.41494	MFAP3L	microfibrillar associated protein 3 like	Down	MFAP3L_Down
226084_at	1.29e-05	7.57e-07	5.1094	5.42246	1.60645	MAP1B	microtubule associated protein 1B	Up	MAP1B_Up
209087_x_at	1.29e-05	7.57e-07	5.10936	5.42227	1.12276	MCAM	melanoma cell adhesion molecule	Up	MCAM_Up
206115_at	1.32e-05	7.74e-07	-5.10473	5.40162	-1.14242	EGR3	early growth response 3	Down	EGR3_Down
235405_at	1.32e-05	7.79e-07	5.10342	5.39578	1.20404	GSTA4	glutathione S-transferase alpha 4	Up	GSTA4_Up
203228_at	1.33e-05	7.84e-07	5.102	5.38943	1.1935	PAFAH1B3	platelet activating factor acetylhydrolase 1b catalytic subunit 3	Up	PAFAH1B3_Up
225258_at	1.35e-05	7.94e-07	5.09922	5.37704	1.1267	FBLIM1	filamin binding LIM protein 1	Up	FBLIM1_Up
216942_s_at	1.35e-05	7.97e-07	5.09852	5.37394	1.26742	CD58	CD58 molecule	Up	CD58_Up
231671_at	1.37e-05	8.09e-07	-5.09533	5.3597	-1.16524	FGA	fibrinogen alpha chain	Down	FGA_Down
205384_at	1.38e-05	8.15e-07	-5.09373	5.35259	-2.23932	FXYD1	FXYD domain containing ion transport regulator 1	Down	FXYD1_Down
210751_s_at	1.38e-05	8.18e-07	-5.09293	5.34904	-1.46842	RGN	regucalcin	Down	RGN_Down
201896_s_at	1.39e-05	8.22e-07	5.0919	5.34446	1.06418	PSRC1	proline and serine rich coiled-coil 1	Up	PSRC1_Up
201693_s_at	1.39e-05	8.25e-07	-5.09111	5.34092	-2.12151	EGR1	early growth response 1	Down	EGR1_Down
218843_at	1.39e-05	8.27e-07	-5.09061	5.33871	-1.13152	FNDC4	fibronectin type III domain containing 4	Down	FNDC4_Down
226483_at	1.4e-05	8.31e-07	5.08946	5.3336	1.11769	TMEM68	transmembrane protein 68	Up	TMEM68_Up
200052_s_at	1.41e-05	8.38e-07	5.08778	5.32612	1.06067	ILF2	interleukin enhancer binding factor 2	Up	ILF2_Up
52940_at	1.41e-05	8.39e-07	-5.0874	5.32441	-1.2093	SIGIRR	single Ig and TIR domain containing	Down	SIGIRR_Down
206417_at	1.41e-05	8.39e-07	-5.08735	5.32418	-1.40443	CNGA1	cyclic nucleotide gated channel alpha 1	Down	CNGA1_Down
230931_at	1.43e-05	8.57e-07	-5.08275	5.30374	-2.28987	PLG	plasminogen	Down	PLG_Down
204521_at	1.44e-05	8.62e-07	5.0817	5.29905	1.23862	FAM216A	family with sequence similarity 216 member A	Up	FAM216A_Up
242546_at	1.46e-05	8.75e-07	5.07836	5.28423	1.2677	LINC01296///DUXAP10	long intergenic non-protein coding RNA 1296///double homeobox A pseudogene 10	Up	LINC01296///DUXAP10_Up
231183_s_at	1.46e-05	8.81e-07	5.07684	5.27749	1.38222	JAG1	jagged 1	Up	JAG1_Up
202309_at	1.48e-05	8.96e-07	-5.07327	5.26164	-1.24917	MTHFD1	methylenetetrahydrofolate dehydrogenase, cyclohydrolase and formyltetrahydrofolate synthetase 1	Down	MTHFD1_Down
219277_s_at	1.53e-05	9.28e-07	-5.06574	5.22819	-1.89362	OGDHL	oxoglutarate dehydrogenase-like	Down	OGDHL_Down
217785_s_at	1.53e-05	9.3e-07	5.06529	5.22622	1.00477	YKT6	YKT6 v-SNARE homolog (S. cerevisiae)	Up	YKT6_Up
242093_at	1.57e-05	9.54e-07	-5.05972	5.20153	-1.15493	SYTL5	synaptotagmin like 5	Down	SYTL5_Down
221928_at	1.61e-05	9.83e-07	-5.05325	5.17287	-1.24996	ACACB	acetyl-CoA carboxylase beta	Down	ACACB_Down
225792_at	1.61e-05	9.89e-07	-5.05204	5.16754	-1.11508	HOOK1	hook microtubule tethering protein 1	Down	HOOK1_Down
204057_at	1.61e-05	9.9e-07	-5.05176	5.16631	-1.12044	IRF8	interferon regulatory factor 8	Down	IRF8_Down
212563_at	1.62e-05	9.98e-07	5.05	5.15849	1.325	MIR7112///BOP1	microRNA 7112///block of proliferation 1	Up	MIR7112///BOP1_Up
204483_at	1.63e-05	1e-06	-5.04949	5.15627	-1.86569	ENO3	enolase 3	Down	ENO3_Down
226745_at	1.63e-05	1e-06	-5.04936	5.15566	-1.27928	CYP4V2	cytochrome P450 family 4 subfamily V member 2	Down	CYP4V2_Down
225904_at	1.66e-05	1.03e-06	5.04361	5.13026	1.06139	CCSAP	centriole, cilia and spindle associated protein	Up	CCSAP_Up
202465_at	1.68e-05	1.04e-06	-5.04144	5.12067	-1.51795	PCOLCE	procollagen C-endopeptidase enhancer	Down	PCOLCE_Down
232428_at	1.7e-05	1.05e-06	-5.03866	5.1084	-2.07442	MOGAT2	monoacylglycerol O-acyltransferase 2	Down	MOGAT2_Down
218542_at	1.7e-05	1.05e-06	5.03819	5.10631	1.54602	CEP55	centrosomal protein 55	Up	CEP55_Up
242963_at	1.71e-05	1.06e-06	-5.03658	5.09918	-1.07461	SGMS2	sphingomyelin synthase 2	Down	SGMS2_Down
206316_s_at	1.72e-05	1.07e-06	5.0355	5.09443	1.21713	KNTC1	kinetochore associated 1	Up	KNTC1_Up
225681_at	1.73e-05	1.08e-06	5.03392	5.08745	2.84493	CTHRC1	collagen triple helix repeat containing 1	Up	CTHRC1_Up
225105_at	1.79e-05	1.12e-06	5.0244	5.04549	2.09181	C12orf75	chromosome 12 open reading frame 75	Up	C12orf75_Up
238332_at	1.8e-05	1.13e-06	5.02244	5.03686	1.74048	ANKRD29	ankyrin repeat domain 29	Up	ANKRD29_Up
1555612_s_at	1.82e-05	1.15e-06	-5.01996	5.02591	-2.30148	G6PC	glucose-6-phosphatase catalytic subunit	Down	G6PC_Down
223333_s_at	1.85e-05	1.17e-06	-5.01567	5.00702	-1.45619	ANGPTL4	angiopoietin like 4	Down	ANGPTL4_Down
203799_at	1.86e-05	1.18e-06	-5.0142	5.00058	-1.2044	LY75-CD302///CD302///LY75	LY75-CD302 readthrough///CD302 molecule///lymphocyte antigen 75	Down	LY75-CD302///CD302///LY75_Down
229465_s_at	1.89e-05	1.2e-06	-5.00997	4.98199	-1.38226	PTPRS	protein tyrosine phosphatase, receptor type S	Down	PTPRS_Down
230008_at	1.92e-05	1.22e-06	5.00661	4.96721	1.29118	THSD7A	thrombospondin type 1 domain containing 7A	Up	THSD7A_Up
210762_s_at	1.93e-05	1.23e-06	-5.00426	4.95688	-1.07861	DLC1	DLC1 Rho GTPase activating protein	Down	DLC1_Down
206727_at	1.98e-05	1.27e-06	-4.99846	4.93139	-3.72213	C9	complement component 9	Down	C9_Down
229588_at	2.03e-05	1.31e-06	4.99159	4.90129	1.05627	DNAJC10	DnaJ heat shock protein family (Hsp40) member C10	Up	DNAJC10_Up
227647_at	2.05e-05	1.32e-06	4.98928	4.89116	1.1407	KCNE3	potassium voltage-gated channel subfamily E regulatory subunit 3	Up	KCNE3_Up
201416_at	2.07e-05	1.34e-06	4.98623	4.87778	1.95215	SOX4	SRY-box 4	Up	SOX4_Up
212196_at	2.12e-05	1.37e-06	-4.98088	4.85433	-1.01132	IL6ST	interleukin 6 signal transducer	Down	IL6ST_Down
236313_at	2.12e-05	1.38e-06	4.98061	4.85319	1.3376	CDKN2B	cyclin dependent kinase inhibitor 2B	Up	CDKN2B_Up
228890_at	2.13e-05	1.38e-06	-4.97998	4.8504	-1.03229	ATOH8	atonal bHLH transcription factor 8	Down	ATOH8_Down
242817_at	2.15e-05	1.4e-06	-4.97727	4.83854	-2.66842	PGLYRP2	peptidoglycan recognition protein 2	Down	PGLYRP2_Down
204622_x_at	2.15e-05	1.4e-06	-4.97608	4.83337	-1.6388	NR4A2	nuclear receptor subfamily 4 group A member 2	Down	NR4A2_Down
217521_at	2.17e-05	1.41e-06	-4.97469	4.82728	-2.35696	HAL	histidine ammonia-lyase	Down	HAL_Down
204589_at	2.18e-05	1.42e-06	4.97351	4.8221	1.00596	NUAK1	NUAK family kinase 1	Up	NUAK1_Up
218611_at	2.2e-05	1.44e-06	4.97103	4.81127	1.02892	IER5	immediate early response 5	Up	IER5_Up
222685_at	2.21e-05	1.45e-06	4.9692	4.80329	1.00092	HAUS6	HAUS augmin like complex subunit 6	Up	HAUS6_Up
220643_s_at	2.26e-05	1.49e-06	4.96334	4.77767	1.16777	FAIM	Fas apoptotic inhibitory molecule	Up	FAIM_Up
232994_s_at	2.3e-05	1.52e-06	4.95889	4.75826	1.14637	ARHGEF28	Rho guanine nucleotide exchange factor 28	Up	ARHGEF28_Up
206840_at	2.31e-05	1.53e-06	-4.95765	4.75285	-2.53889	AFM	afamin	Down	AFM_Down
227407_at	2.34e-05	1.55e-06	-4.95481	4.7405	-1.00039	TAPT1	transmembrane anterior posterior transformation 1	Down	TAPT1_Down
211813_x_at	2.39e-05	1.6e-06	-4.94801	4.71087	-2.26845	DCN	decorin	Down	DCN_Down
235088_at	2.4e-05	1.6e-06	4.94742	4.70831	1.01966	C4orf46	chromosome 4 open reading frame 46	Up	C4orf46_Up
225800_at	2.42e-05	1.62e-06	4.94492	4.69741	1.13022	JAZF1	JAZF zinc finger 1	Up	JAZF1_Up
224461_s_at	2.43e-05	1.62e-06	4.94448	4.69549	1.01959	AIFM2	apoptosis inducing factor, mitochondria associated 2	Up	AIFM2_Up
219060_at	2.43e-05	1.62e-06	4.94418	4.69417	1.20578	WDYHV1	WDYHV motif containing 1	Up	WDYHV1_Up
226433_at	2.45e-05	1.65e-06	4.94086	4.67972	1.67021	RNF157	ring finger protein 157	Up	RNF157_Up
206007_at	2.46e-05	1.66e-06	-4.93964	4.67444	-2.19661	PRG4	proteoglycan 4	Down	PRG4_Down
210667_s_at	2.48e-05	1.67e-06	-4.93766	4.66582	-1.09733	C21orf33	chromosome 21 open reading frame 33	Down	C21orf33_Down
225447_at	2.5e-05	1.69e-06	4.93614	4.6592	1.14104	GPD2	glycerol-3-phosphate dehydrogenase 2	Up	GPD2_Up
202444_s_at	2.52e-05	1.7e-06	-4.93406	4.65018	-1.32356	ERLIN1	ER lipid raft associated 1	Down	ERLIN1_Down
210565_at	2.54e-05	1.72e-06	-4.93144	4.6388	-1.28203	GCGR	glucagon receptor	Down	GCGR_Down
202345_s_at	2.57e-05	1.75e-06	4.92772	4.62262	1.72699	FABP5	fatty acid binding protein 5	Up	FABP5_Up
1554628_at	2.58e-05	1.75e-06	4.92737	4.6211	1.36462	ZNF57	zinc finger protein 57	Up	ZNF57_Up
227361_at	2.58e-05	1.76e-06	-4.92674	4.61838	-1.84529	HS3ST3B1	heparan sulfate-glucosamine 3-sulfotransferase 3B1	Down	HS3ST3B1_Down
213093_at	2.61e-05	1.78e-06	4.92387	4.60593	1.07538	PRKCA	protein kinase C alpha	Up	PRKCA_Up
226364_at	2.64e-05	1.81e-06	4.92062	4.59185	1.0041	HIP1	huntingtin interacting protein 1	Up	HIP1_Up
211248_s_at	2.68e-05	1.84e-06	-4.91706	4.57641	-1.07112	CHRD	chordin	Down	CHRD_Down
206414_s_at	2.69e-05	1.85e-06	4.91564	4.57027	1.41926	ASAP2	ArfGAP with SH3 domain, ankyrin repeat and PH domain 2	Up	ASAP2_Up
227099_s_at	2.7e-05	1.86e-06	-4.91499	4.56744	-1.76587	C11orf96	chromosome 11 open reading frame 96	Down	C11orf96_Down
203211_s_at	2.73e-05	1.88e-06	4.91208	4.55484	1.1181	MTMR2	myotubularin related protein 2	Up	MTMR2_Up
213649_at	2.73e-05	1.88e-06	-4.91202	4.55456	-1.13917	SRSF7	serine and arginine rich splicing factor 7	Down	SRSF7_Down
228415_at	2.79e-05	1.93e-06	4.90638	4.53019	1.01263	AP1S2	adaptor related protein complex 1 sigma 2 subunit	Up	AP1S2_Up
226460_at	2.81e-05	1.95e-06	-4.90447	4.52192	-1.22476	FNIP2	folliculin interacting protein 2	Down	FNIP2_Down
203665_at	2.81e-05	1.95e-06	-4.90375	4.5188	-1.34352	HMOX1	heme oxygenase 1	Down	HMOX1_Down
217733_s_at	2.83e-05	1.97e-06	4.90178	4.51027	1.10951	TMSB10	thymosin beta 10	Up	TMSB10_Up
206396_at	2.86e-05	1.99e-06	-4.89926	4.49937	-1.43571	SLC1A1	solute carrier family 1 member 1	Down	SLC1A1_Down
205073_at	2.9e-05	2.03e-06	-4.89574	4.48417	-1.31138	CYP2J2	cytochrome P450 family 2 subfamily J member 2	Down	CYP2J2_Down
209980_s_at	2.92e-05	2.04e-06	-4.8937	4.47535	-1.47919	MIR6778///SHMT1	microRNA 6778///serine hydroxymethyltransferase 1	Down	MIR6778///SHMT1_Down
207980_s_at	2.94e-05	2.06e-06	-4.89213	4.46862	-1.61763	CITED2	Cbp/p300 interacting transactivator with Glu/Asp rich carboxy-terminal domain 2	Down	CITED2_Down
228004_at	2.96e-05	2.07e-06	-4.8905	4.46154	-1.11733	LINC00261	long intergenic non-protein coding RNA 261	Down	LINC00261_Down
201816_s_at	2.98e-05	2.1e-06	4.88832	4.45214	1.05928	GBAS	glioblastoma amplified sequence	Up	GBAS_Up
224348_s_at	3.01e-05	2.12e-06	-4.88569	4.4408	-1.06845	HOTS	H19 opposite tumor suppressor	Down	HOTS_Down
242560_at	3.04e-05	2.15e-06	4.88281	4.42842	1.06155	FANCD2	Fanconi anemia complementation group D2	Up	FANCD2_Up
231784_s_at	3.17e-05	2.26e-06	4.87166	4.38038	1.22706	DCAF13	DDB1 and CUL4 associated factor 13	Up	DCAF13_Up
204709_s_at	3.18e-05	2.26e-06	4.87141	4.37932	1.33942	KIF23	kinesin family member 23	Up	KIF23_Up
242350_s_at	3.26e-05	2.34e-06	4.86427	4.34861	1.88452	ST8SIA6-AS1	ST8SIA6 antisense RNA 1	Up	ST8SIA6-AS1_Up
243894_at	3.28e-05	2.36e-06	-4.86245	4.34079	-1.26169	SLC41A2	solute carrier family 41 member 2	Down	SLC41A2_Down
220651_s_at	3.29e-05	2.36e-06	4.8616	4.33715	1.44275	MCM10	minichromosome maintenance 10 replication initiation factor	Up	MCM10_Up
223360_at	3.3e-05	2.37e-06	4.86119	4.33537	1.1164	SPATC1L	spermatogenesis and centriole associated 1-like	Up	SPATC1L_Up
204333_s_at	3.35e-05	2.41e-06	4.8573	4.31868	1.16265	AGA	aspartylglucosaminidase	Up	AGA_Up
201954_at	3.38e-05	2.44e-06	4.85489	4.30835	1.01749	ARPC1B	actin related protein 2/3 complex subunit 1B	Up	ARPC1B_Up
221258_s_at	3.39e-05	2.45e-06	4.85333	4.30164	1.1028	KIF18A	kinesin family member 18A	Up	KIF18A_Up
209417_s_at	3.47e-05	2.52e-06	4.84764	4.27727	1.00137	IFI35	interferon induced protein 35	Up	IFI35_Up
227417_at	3.48e-05	2.53e-06	-4.84639	4.2719	-1.28444	MARC2	mitochondrial amidoxime reducing component 2	Down	MARC2_Down
220479_at	3.5e-05	2.55e-06	-4.84453	4.26395	-1.54811	CPS1-IT1	CPS1 intronic transcript 1	Down	CPS1-IT1_Down
206170_at	3.5e-05	2.56e-06	-4.84434	4.2631	-1.41114	ADRB2	adrenoceptor beta 2	Down	ADRB2_Down
209309_at	3.54e-05	2.59e-06	-4.84133	4.25024	-1.6633	AZGP1	alpha-2-glycoprotein 1, zinc-binding	Down	AZGP1_Down
201785_at	3.54e-05	2.59e-06	4.84132	4.25019	1.32584	RNASE1	ribonuclease A family member 1, pancreatic	Up	RNASE1_Up
218424_s_at	3.55e-05	2.59e-06	-4.84096	4.24866	-1.54336	STEAP3	STEAP3 metalloreductase	Down	STEAP3_Down
208891_at	3.58e-05	2.63e-06	-4.83801	4.236	-1.30693	DUSP6	dual specificity phosphatase 6	Down	DUSP6_Down
214440_at	3.62e-05	2.66e-06	-4.83502	4.22321	-1.04553	NAT1	N-acetyltransferase 1	Down	NAT1_Down
229596_at	3.64e-05	2.68e-06	-4.83378	4.21794	-1.79822	AMDHD1	amidohydrolase domain containing 1	Down	AMDHD1_Down
223922_x_at	3.76e-05	2.78e-06	-4.82524	4.18143	-1.15684	MS4A6A	membrane spanning 4-domains A6A	Down	MS4A6A_Down
207655_s_at	3.81e-05	2.83e-06	-4.82158	4.16584	-1.16679	BLNK	B-cell linker	Down	BLNK_Down
209464_at	3.82e-05	2.85e-06	4.8203	4.16034	1.11953	AURKB	aurora kinase B	Up	AURKB_Up
224989_at	3.83e-05	2.86e-06	-4.81955	4.15716	-1.23528	SMIM14	small integral membrane protein 14	Down	SMIM14_Down
203562_at	3.83e-05	2.86e-06	-4.81936	4.15633	-1.02649	FEZ1	fasciculation and elongation protein zeta 1	Down	FEZ1_Down
207102_at	3.99e-05	3e-06	-4.80858	4.11039	-3.0157	AKR1D1	aldo-keto reductase family 1, member D1	Down	AKR1D1_Down
205167_s_at	4.05e-05	3.05e-06	4.80502	4.09526	1.11755	CDC25C	cell division cycle 25C	Up	CDC25C_Up
205075_at	4.07e-05	3.06e-06	-4.80395	4.09068	-1.32711	SERPINF2	serpin family F member 2	Down	SERPINF2_Down
206979_at	4.17e-05	3.16e-06	-4.79696	4.06097	-1.70242	C8B	complement component 8, beta polypeptide	Down	C8B_Down
219195_at	4.18e-05	3.17e-06	-4.79649	4.05897	-1.6653	PPARGC1A	PPARG coactivator 1 alpha	Down	PPARGC1A_Down
203209_at	4.19e-05	3.17e-06	4.796	4.05687	1.00443	RFC5	replication factor C subunit 5	Up	RFC5_Up
209301_at	4.21e-05	3.2e-06	-4.79405	4.04861	-1.79105	CA2	carbonic anhydrase 2	Down	CA2_Down
215129_at	4.31e-05	3.29e-06	-4.78788	4.02242	-1.44671	PIK3C2G	phosphatidylinositol-4-phosphate 3-kinase catalytic subunit type 2 gamma	Down	PIK3C2G_Down
225171_at	4.35e-05	3.32e-06	4.78573	4.0133	1.13871	ARHGAP18	Rho GTPase activating protein 18	Up	ARHGAP18_Up
205614_x_at	4.35e-05	3.33e-06	-4.78541	4.01192	-1.16877	MST1	macrophage stimulating 1	Down	MST1_Down
206527_at	4.43e-05	3.4e-06	-4.78038	3.99059	-1.24684	ABAT	4-aminobutyrate aminotransferase	Down	ABAT_Down
210168_at	4.48e-05	3.45e-06	-4.77717	3.97699	-2.19122	C6	complement component 6	Down	C6_Down
208754_s_at	4.49e-05	3.47e-06	4.7763	3.97329	1.10583	NAP1L1	nucleosome assembly protein 1 like 1	Up	NAP1L1_Up
223513_at	4.51e-05	3.48e-06	4.77548	3.96982	1.05049	CENPJ	centromere protein J	Up	CENPJ_Up
219733_s_at	4.59e-05	3.56e-06	-4.77032	3.94797	-1.88158	SLC27A5	solute carrier family 27 member 5	Down	SLC27A5_Down
209614_at	4.61e-05	3.58e-06	-4.7691	3.94281	-2.77285	ADH1B	alcohol dehydrogenase 1B (class I), beta polypeptide	Down	ADH1B_Down
222155_s_at	4.68e-05	3.64e-06	4.7651	3.9259	1.09305	SLC52A2	solute carrier family 52 member 2	Up	SLC52A2_Up
227962_at	4.7e-05	3.67e-06	-4.76353	3.91928	-1.0841	ACOX1	acyl-CoA oxidase 1	Down	ACOX1_Down
235044_at	4.75e-05	3.71e-06	4.76103	3.9087	1.06671	CYYR1	cysteine and tyrosine rich 1	Up	CYYR1_Up
1555345_at	4.75e-05	3.72e-06	-4.76067	3.90721	-2.29739	SLC38A4	solute carrier family 38 member 4	Down	SLC38A4_Down
234987_at	4.77e-05	3.74e-06	4.75915	3.90079	1.11004	SAMHD1	SAM and HD domain containing deoxynucleoside triphosphate triphosphohydrolase 1	Up	SAMHD1_Up
220840_s_at	4.8e-05	3.77e-06	4.75755	3.89401	1.29506	C1orf112	chromosome 1 open reading frame 112	Up	C1orf112_Up
225021_at	5e-05	3.95e-06	4.74689	3.84903	1.10277	ZNF532	zinc finger protein 532	Up	ZNF532_Up
205789_at	5.02e-05	3.97e-06	-4.74559	3.84355	-1.52581	CD1D	CD1d molecule	Down	CD1D_Down
229778_at	5.11e-05	4.05e-06	4.74114	3.82481	1.55771	SPX	spexin hormone	Up	SPX_Up
203680_at	5.13e-05	4.07e-06	-4.74012	3.82053	-1.15121	PRKAR2B	protein kinase cAMP-dependent type II regulatory subunit beta	Down	PRKAR2B_Down
219494_at	5.17e-05	4.11e-06	4.73788	3.81109	1.01573	RAD54B	RAD54 homolog B (S. cerevisiae)	Up	RAD54B_Up
230438_at	5.18e-05	4.12e-06	-4.73749	3.80943	-1.51744	TBX15	T-box 15	Down	TBX15_Down
200750_s_at	5.23e-05	4.16e-06	4.73498	3.79888	1.02505	RAN	RAN, member RAS oncogene family	Up	RAN_Up
207907_at	5.23e-05	4.17e-06	-4.73485	3.79834	-1.52732	TNFSF14	tumor necrosis factor superfamily member 14	Down	TNFSF14_Down
202936_s_at	5.25e-05	4.19e-06	4.73376	3.79374	2.0926	SOX9	SRY-box 9	Up	SOX9_Up
1558290_a_at	5.37e-05	4.31e-06	4.72738	3.76692	1.1335	MIR1204///PVT1	microRNA 1204///Pvt1 oncogene (non-protein coding)	Up	MIR1204///PVT1_Up
226733_at	5.42e-05	4.35e-06	4.72507	3.75724	1.07322	PFKFB2	6-phosphofructo-2-kinase/fructose-2,6-biphosphatase 2	Up	PFKFB2_Up
229521_at	5.42e-05	4.35e-06	-4.72492	3.7566	-1.10548	CCDC71L	coiled-coil domain containing 71-like	Down	CCDC71L_Down
229310_at	5.44e-05	4.37e-06	4.72401	3.75277	1.57164	KLHL29	kelch like family member 29	Up	KLHL29_Up
204704_s_at	5.48e-05	4.41e-06	-4.72179	3.74348	-2.82994	ALDOB	aldolase, fructose-bisphosphate B	Down	ALDOB_Down
205695_at	5.49e-05	4.42e-06	-4.72152	3.74235	-2.67363	SDS	serine dehydratase	Down	SDS_Down
200897_s_at	5.53e-05	4.46e-06	4.71948	3.73376	1.5821	PALLD	palladin, cytoskeletal associated protein	Up	PALLD_Up
204264_at	5.56e-05	4.48e-06	-4.71826	3.72865	-1.0683	CPT2	carnitine palmitoyltransferase 2	Down	CPT2_Down
1558956_s_at	5.58e-05	4.51e-06	4.71696	3.72322	1.1329	IFT80	intraflagellar transport 80	Up	IFT80_Up
200665_s_at	5.6e-05	4.53e-06	4.71593	3.71889	1.22621	SPARC	secreted protein acidic and cysteine rich	Up	SPARC_Up
211538_s_at	5.63e-05	4.55e-06	4.71476	3.71397	1.35664	HSPA2	heat shock protein family A (Hsp70) member 2	Up	HSPA2_Up
225252_at	5.67e-05	4.59e-06	4.71278	3.70567	1.39741	SRXN1	sulfiredoxin 1	Up	SRXN1_Up
204341_at	5.67e-05	4.6e-06	4.71271	3.70537	2.19041	TRIM16	tripartite motif containing 16	Up	TRIM16_Up
205768_s_at	5.67e-05	4.6e-06	-4.71239	3.70403	-1.82899	SLC27A2	solute carrier family 27 member 2	Down	SLC27A2_Down
1554168_a_at	5.7e-05	4.63e-06	4.71103	3.69836	1.00417	SH3KBP1	SH3 domain containing kinase binding protein 1	Up	SH3KBP1_Up
223781_x_at	5.71e-05	4.65e-06	-4.71012	3.69454	-2.58262	ADH4	alcohol dehydrogenase 4 (class II), pi polypeptide	Down	ADH4_Down
239093_at	5.73e-05	4.67e-06	-4.70899	3.68981	-1.76162	HOGA1	4-hydroxy-2-oxoglutarate aldolase 1	Down	HOGA1_Down
215464_s_at	6.05e-05	4.99e-06	4.69403	3.62723	1.02004	P2RX5-TAX1BP3///TAX1BP3///P2RX5	P2RX5-TAX1BP3 readthrough (NMD candidate)///Tax1 binding protein 3///purinergic receptor P2X 5	Up	P2RX5-TAX1BP3///TAX1BP3///P2RX5_Up
1554668_a_at	6.06e-05	5e-06	-4.69365	3.62562	-1.16435	FAM151A	family with sequence similarity 151 member A	Down	FAM151A_Down
241418_at	6.15e-05	5.09e-06	4.68947	3.60817	1.98276	NMRAL1P1	NmrA like redox sensor 1 pseudogene 1	Up	NMRAL1P1_Up
219304_s_at	6.18e-05	5.13e-06	4.68791	3.60165	1.17259	PDGFD	platelet derived growth factor D	Up	PDGFD_Up
206287_s_at	6.24e-05	5.18e-06	-4.68537	3.59108	-1.6831	ITIH4	inter-alpha-trypsin inhibitor heavy chain family member 4	Down	ITIH4_Down
207601_at	6.29e-05	5.24e-06	-4.68303	3.58131	-1.25806	SULT1B1	sulfotransferase family 1B member 1	Down	SULT1B1_Down
235496_at	6.32e-05	5.26e-06	4.68186	3.57643	1.28918	HRCT1	histidine rich carboxyl terminus 1	Up	HRCT1_Up
228776_at	6.33e-05	5.28e-06	4.68112	3.57336	1.40611	GJC1	gap junction protein gamma 1	Up	GJC1_Up
202286_s_at	6.39e-05	5.33e-06	-4.67894	3.56428	-1.90419	TACSTD2	tumor-associated calcium signal transducer 2	Down	TACSTD2_Down
207401_at	6.4e-05	5.35e-06	-4.67822	3.56127	-1.1434	PROX1	prospero homeobox 1	Down	PROX1_Down
231018_at	6.56e-05	5.5e-06	-4.67169	3.53409	-1.13077	PALM3	paralemmin 3	Down	PALM3_Down
1558034_s_at	6.56e-05	5.51e-06	-4.6714	3.53286	-1.59361	CP	ceruloplasmin (ferroxidase)	Down	CP_Down
219076_s_at	6.58e-05	5.52e-06	-4.67088	3.5307	-1.11844	PXMP2	peroxisomal membrane protein 2	Down	PXMP2_Down
206765_at	6.61e-05	5.56e-06	4.66948	3.52485	1.01726	KCNJ2	potassium voltage-gated channel subfamily J member 2	Up	KCNJ2_Up
218552_at	6.72e-05	5.67e-06	-4.6648	3.50542	-1.14252	ECHDC2	enoyl-CoA hydratase domain containing 2	Down	ECHDC2_Down
231866_at	6.74e-05	5.69e-06	4.66401	3.50213	1.05154	LNPEP	leucyl and cystinyl aminopeptidase	Up	LNPEP_Up
203854_at	6.78e-05	5.74e-06	-4.66226	3.49487	-1.11288	CFI	complement factor I	Down	CFI_Down
224061_at	6.82e-05	5.78e-06	-4.66043	3.48724	-1.2026	INMT	indolethylamine N-methyltransferase	Down	INMT_Down
227285_at	6.84e-05	5.81e-06	4.65945	3.48319	1.10636	CIART	circadian associated repressor of transcription	Up	CIART_Up
201850_at	7.05e-05	6.04e-06	4.65054	3.44622	1.34198	CAPG	capping actin protein, gelsolin like	Up	CAPG_Up
230238_at	7.19e-05	6.18e-06	4.64534	3.42467	1.4867	SOWAHA	sosondowah ankyrin repeat domain family member A	Up	SOWAHA_Up
228654_at	7.25e-05	6.24e-06	4.64299	3.41492	1.09225	SPIN4	spindlin family member 4	Up	SPIN4_Up
225987_at	7.42e-05	6.41e-06	-4.63697	3.38999	-1.80961	STEAP4	STEAP4 metalloreductase	Down	STEAP4_Down
219306_at	7.43e-05	6.42e-06	4.63639	3.38761	1.2446	KIF15	kinesin family member 15	Up	KIF15_Up
235085_at	7.52e-05	6.51e-06	4.63325	3.37461	1.2429	SGK223	homolog of rat pragma of Rnd2	Up	SGK223_Up
204608_at	7.74e-05	6.73e-06	-4.62555	3.34282	-1.12168	ASL	argininosuccinate lyase	Down	ASL_Down
209209_s_at	7.74e-05	6.73e-06	-4.62553	3.34274	-1.07592	FERMT2	fermitin family member 2	Down	FERMT2_Down
205476_at	7.8e-05	6.79e-06	4.62358	3.33466	2.70854	CCL20	C-C motif chemokine ligand 20	Up	CCL20_Up
215071_s_at	7.81e-05	6.81e-06	4.6231	3.33271	1.35521	HIST1H2AC	histone cluster 1, H2ac	Up	HIST1H2AC_Up
226807_at	7.92e-05	6.92e-06	-4.61934	3.31718	-1.0623	ZFP1	ZFP1 zinc finger protein	Down	ZFP1_Down
209154_at	8.13e-05	7.13e-06	4.61236	3.28839	1.14065	P2RX5-TAX1BP3///TAX1BP3	P2RX5-TAX1BP3 readthrough (NMD candidate)///Tax1 binding protein 3	Up	P2RX5-TAX1BP3///TAX1BP3_Up
207691_x_at	8.16e-05	7.17e-06	4.61125	3.28382	1.07577	ENTPD1	ectonucleoside triphosphate diphosphohydrolase 1	Up	ENTPD1_Up
220122_at	8.22e-05	7.24e-06	4.6089	3.27414	1.62106	MCTP1	multiple C2 and transmembrane domain containing 1	Up	MCTP1_Up
204319_s_at	8.4e-05	7.42e-06	4.6033	3.25111	1.10882	RGS10	regulator of G-protein signaling 10	Up	RGS10_Up
219732_at	8.43e-05	7.45e-06	4.60228	3.24692	1.79227	PLPPR1	phospholipid phosphatase related 1	Up	PLPPR1_Up
229831_at	8.5e-05	7.52e-06	-4.60019	3.23832	-2.08996	CNTN3	contactin 3	Down	CNTN3_Down
1558279_a_at	8.51e-05	7.53e-06	-4.59972	3.23639	-1.13095	KDSR	3-ketodihydrosphingosine reductase	Down	KDSR_Down
206344_at	8.59e-05	7.62e-06	-4.59695	3.22503	-1.66141	PON1	paraoxonase 1	Down	PON1_Down
216381_x_at	8.65e-05	7.68e-06	-4.59519	3.21778	-1.44576	AKR7A3	aldo-keto reductase family 7 member A3	Down	AKR7A3_Down
218741_at	8.85e-05	7.89e-06	4.589	3.19237	1.07532	CENPM	centromere protein M	Up	CENPM_Up
241342_at	9.13e-05	8.2e-06	4.58003	3.15561	1.3482	TMEM65	transmembrane protein 65	Up	TMEM65_Up
224997_x_at	9.19e-05	8.27e-06	-4.57825	3.14832	-2.65298	MIR675///H19	microRNA 675///H19, imprinted maternally expressed transcript (non-protein coding)	Down	MIR675///H19_Down
228033_at	9.24e-05	8.32e-06	4.57667	3.14183	1.33642	E2F7	E2F transcription factor 7	Up	E2F7_Up
218908_at	9.26e-05	8.35e-06	4.57591	3.13875	1.0411	ASPSCR1	ASPSCR1, UBX domain containing tether for SLC2A4	Up	ASPSCR1_Up
231786_at	9.38e-05	8.47e-06	4.5726	3.12518	1.75692	HOXA13	homeobox A13	Up	HOXA13_Up
230602_at	9.45e-05	8.55e-06	-4.57036	3.11604	-1.67546	ACMSD	aminocarboxymuconate semialdehyde decarboxylase	Down	ACMSD_Down
211557_x_at	9.52e-05	8.63e-06	-4.5682	3.10722	-1.00903	SLCO2B1	solute carrier organic anion transporter family member 2B1	Down	SLCO2B1_Down
223599_at	9.56e-05	8.68e-06	4.56692	3.10197	1.50135	TRIM6	tripartite motif containing 6	Up	TRIM6_Up
226785_at	9.61e-05	8.74e-06	-4.56522	3.09503	-1.36025	ATP11C	ATPase phospholipid transporting 11C	Down	ATP11C_Down
235350_at	9.72e-05	8.87e-06	-4.56194	3.08161	-1.08098	C4orf19	chromosome 4 open reading frame 19	Down	C4orf19_Down
208383_s_at	9.73e-05	8.88e-06	-4.56175	3.08085	-2.73842	PCK1	phosphoenolpyruvate carboxykinase 1	Down	PCK1_Down
210172_at	9.84e-05	9.01e-06	-4.55824	3.06651	-1.298	SF1	splicing factor 1	Down	SF1_Down
222486_s_at	9.9e-05	9.08e-06	-4.55654	3.05958	-1.1517	ADAMTS1	ADAM metallopeptidase with thrombospondin type 1 motif 1	Down	ADAMTS1_Down
1568592_at	9.96e-05	9.15e-06	4.55478	3.05243	1.03038	TRIM69	tripartite motif containing 69	Up	TRIM69_Up
209230_s_at	0.0001	9.24e-06	4.5523	3.04231	1.19128	NUPR1	nuclear protein 1, transcriptional regulator	Up	NUPR1_Up
235201_at	0.000101	9.28e-06	-4.55145	3.03885	-1.40659	FOXP2	forkhead box P2	Down	FOXP2_Down
235048_at	0.000101	9.28e-06	4.55139	3.03857	1.5586	FAM169A	family with sequence similarity 169 member A	Up	FAM169A_Up
1552281_at	0.000102	9.45e-06	-4.5473	3.02191	-1.23053	SLC39A5	solute carrier family 39 member 5	Down	SLC39A5_Down
222039_at	0.000103	9.48e-06	4.54636	3.01808	1.0834	KIF18B	kinesin family member 18B	Up	KIF18B_Up
226456_at	0.000103	9.56e-06	4.54462	3.011	1.02239	RMI2	RecQ mediated genome instability 2	Up	RMI2_Up
223315_at	0.000104	9.65e-06	-4.54241	3.00203	-1.36778	NTN4	netrin 4	Down	NTN4_Down
219386_s_at	0.000105	9.73e-06	4.54033	2.99358	1.27188	SLAMF8	SLAM family member 8	Up	SLAMF8_Up
205234_at	0.000105	9.74e-06	-4.54026	2.99326	-1.67486	SLC16A4	solute carrier family 16 member 4	Down	SLC16A4_Down
207874_s_at	0.000105	9.74e-06	-4.54014	2.99277	-2.47011	CFHR4	complement factor H related 4	Down	CFHR4_Down
208650_s_at	0.000107	1e-05	4.53383	2.96716	2.72021	CD24	CD24 molecule	Up	CD24_Up
227606_s_at	0.000108	1.01e-05	4.53104	2.95582	1.04152	STAMBPL1	STAM binding protein like 1	Up	STAMBPL1_Up
201422_at	0.000111	1.04e-05	4.5252	2.93208	1.04368	IFI30///PIK3R2	IFI30, lysosomal thiol reductase///phosphoinositide-3-kinase regulatory subunit 2	Up	IFI30///PIK3R2_Up
205054_at	0.000112	1.05e-05	4.52241	2.92079	1.91685	NEB	nebulin	Up	NEB_Up
218613_at	0.000116	1.09e-05	-4.51318	2.88339	-1.19107	PSD3	pleckstrin and Sec7 domain containing 3	Down	PSD3_Down
223358_s_at	0.000116	1.1e-05	4.5118	2.8778	1.01453	PDE7A	phosphodiesterase 7A	Up	PDE7A_Up
226272_at	0.000116	1.1e-05	4.51108	2.8749	1.26106	RCAN3	RCAN family member 3	Up	RCAN3_Up
220865_s_at	0.000118	1.12e-05	4.50758	2.86074	1.036	PDSS1	prenyl (decaprenyl) diphosphate synthase, subunit 1	Up	PDSS1_Up
202720_at	0.000118	1.13e-05	4.50629	2.85553	1.12338	TES	testin LIM domain protein	Up	TES_Up
205363_at	0.000118	1.13e-05	-4.50621	2.85519	-2.64571	BBOX1	gamma-butyrobetaine hydroxylase 1	Down	BBOX1_Down
235086_at	0.000121	1.16e-05	-4.50019	2.83088	-1.05755	THBS1	thrombospondin 1	Down	THBS1_Down
238003_at	0.000122	1.17e-05	-4.49704	2.81818	-2.02888	HEPN1///HEPACAM	hepatocellular carcinoma, down-regulated 1///hepatic and glial cell adhesion molecule	Down	HEPN1///HEPACAM_Down
203636_at	0.000123	1.18e-05	4.49446	2.80773	1.04015	MID1	midline 1	Up	MID1_Up
213695_at	0.000124	1.19e-05	-4.49351	2.80392	-1.5213	PON3	paraoxonase 3	Down	PON3_Down
201798_s_at	0.000125	1.21e-05	4.49	2.78977	1.22501	MYOF	myoferlin	Up	MYOF_Up
213974_at	0.000126	1.22e-05	-4.4876	2.78008	-1.40762	ADAMTSL3	ADAMTS like 3	Down	ADAMTSL3_Down
214475_x_at	0.000127	1.22e-05	-4.48674	2.77663	-1.06273	CAPN3	calpain 3	Down	CAPN3_Down
1555852_at	0.000127	1.23e-05	4.48574	2.77261	1.17561	PSMB8-AS1	PSMB8 antisense RNA 1 (head to head)	Up	PSMB8-AS1_Up
225612_s_at	0.000128	1.24e-05	4.48374	2.76454	1.90017	B3GNT5	UDP-GlcNAc:betaGal beta-1,3-N-acetylglucosaminyltransferase 5	Up	B3GNT5_Up
219493_at	0.000128	1.24e-05	4.48306	2.76183	1.28953	SHCBP1	SHC binding and spindle associated 1	Up	SHCBP1_Up
242814_at	0.00013	1.26e-05	-4.47943	2.7472	-1.04376	SERPINB9	serpin family B member 9	Down	SERPINB9_Down
238058_at	0.000133	1.3e-05	4.47302	2.72143	1.08375	PRR34-AS1	PRR34 antisense RNA 1	Up	PRR34-AS1_Up
209875_s_at	0.000134	1.31e-05	4.47089	2.71286	3.23213	SPP1	secreted phosphoprotein 1	Up	SPP1_Up
204273_at	0.000135	1.32e-05	-4.46828	2.7024	-1.25226	EDNRB	endothelin receptor type B	Down	EDNRB_Down
219118_at	0.000135	1.33e-05	4.46806	2.70149	1.27911	FKBP11	FK506 binding protein 11	Up	FKBP11_Up
208836_at	0.000135	1.33e-05	4.46741	2.69889	1.23609	ATP1B3	ATPase Na+/K+ transporting subunit beta 3	Up	ATP1B3_Up
228411_at	0.000139	1.37e-05	4.45979	2.66833	1.16943	PARD3B	par-3 family cell polarity regulator beta	Up	PARD3B_Up
226134_s_at	0.000141	1.4e-05	4.45574	2.65208	1.20861	MSI2	musashi RNA binding protein 2	Up	MSI2_Up
204083_s_at	0.000144	1.43e-05	4.45013	2.62964	1.30931	TPM2	tropomyosin 2 (beta)	Up	TPM2_Up
222291_at	0.000144	1.43e-05	-4.44928	2.62621	-1.34769	FAM149A	family with sequence similarity 149 member A	Down	FAM149A_Down
227001_at	0.000147	1.47e-05	4.44416	2.60574	1.3807	NIPAL2	NIPA like domain containing 2	Up	NIPAL2_Up
238681_at	0.000147	1.47e-05	4.4434	2.60273	1.14226	GDPD1	glycerophosphodiester phosphodiesterase domain containing 1	Up	GDPD1_Up
215103_at	0.000148	1.48e-05	-4.44193	2.59685	-1.74274	CYP2C18	cytochrome P450 family 2 subfamily C member 18	Down	CYP2C18_Down
203438_at	0.000151	1.52e-05	4.43556	2.57142	1.02846	STC2	stanniocalcin 2	Up	STC2_Up
228455_at	0.000153	1.53e-05	4.43375	2.5642	1.08996	RBM15	RNA binding motif protein 15	Up	RBM15_Up
226661_at	0.000154	1.55e-05	4.43129	2.55437	1.08919	CDCA2	cell division cycle associated 2	Up	CDCA2_Up
244385_at	0.000154	1.55e-05	-4.43052	2.55131	-1.10168	KDM4C	lysine demethylase 4C	Down	KDM4C_Down
213279_at	0.000159	1.61e-05	-4.42178	2.51648	-1.19137	DHRS1	dehydrogenase/reductase 1	Down	DHRS1_Down
209969_s_at	0.000164	1.67e-05	4.41395	2.48533	1.40217	STAT1	signal transducer and activator of transcription 1	Up	STAT1_Up
225177_at	0.000167	1.71e-05	4.40827	2.46276	1.04918	RAB11FIP1	RAB11 family interacting protein 1	Up	RAB11FIP1_Up
202275_at	0.000172	1.77e-05	4.39984	2.42933	1.62526	G6PD	glucose-6-phosphate dehydrogenase	Up	G6PD_Up
230645_at	0.000172	1.77e-05	4.39956	2.42819	1.42548	FRMD3	FERM domain containing 3	Up	FRMD3_Up
226682_at	0.000174	1.79e-05	-4.39695	2.41787	-1.15952	RORA	RAR related orphan receptor A	Down	RORA_Down
203159_at	0.000175	1.8e-05	4.39534	2.4115	1.45382	GLS	glutaminase	Up	GLS_Up
227337_at	0.000179	1.85e-05	-4.38889	2.38596	-1.58866	ANKRD37	ankyrin repeat domain 37	Down	ANKRD37_Down
207426_s_at	0.00018	1.86e-05	4.3872	2.37926	1.14607	TNFSF4	tumor necrosis factor superfamily member 4	Up	TNFSF4_Up
227297_at	0.000181	1.88e-05	-4.38538	2.37207	-1.23084	ITGA9	integrin subunit alpha 9	Down	ITGA9_Down
214657_s_at	0.000185	1.92e-05	-4.3796	2.34923	-1.50474	MIR612///NEAT1	microRNA 612///nuclear paraspeckle assembly transcript 1 (non-protein coding)	Down	MIR612///NEAT1_Down
227314_at	0.000185	1.93e-05	4.37838	2.34442	1.65188	ITGA2	integrin subunit alpha 2	Up	ITGA2_Up
236741_at	0.000187	1.96e-05	-4.37521	2.33191	-1.27952	WDR72	WD repeat domain 72	Down	WDR72_Down
230300_at	0.000191	2.01e-05	-4.36953	2.3095	-1.1438	PSMA5	proteasome subunit alpha 5	Down	PSMA5_Down
203642_s_at	0.000191	2.01e-05	-4.36924	2.30833	-1.18643	COBLL1	cordon-bleu WH2 repeat protein like 1	Down	COBLL1_Down
226846_at	0.000191	2.01e-05	-4.36909	2.30777	-1.36046	PHYHD1	phytanoyl-CoA dioxygenase domain containing 1	Down	PHYHD1_Down
229450_at	0.000193	2.04e-05	4.36563	2.2941	1.29868	IFIT3	interferon induced protein with tetratricopeptide repeats 3	Up	IFIT3_Up
231693_at	0.000196	2.08e-05	-4.36104	2.27604	-1.05479	FABP1	fatty acid binding protein 1	Down	FABP1_Down
220393_at	0.000196	2.08e-05	-4.36075	2.27491	-1.7248	LGSN	lengsin, lens protein with glutamine synthetase domain	Down	LGSN_Down
204120_s_at	0.0002	2.12e-05	-4.3558	2.25544	-1.08364	ADK	adenosine kinase	Down	ADK_Down
211965_at	0.000201	2.14e-05	-4.35383	2.2477	-1.00907	ZFP36L1	ZFP36 ring finger protein like 1	Down	ZFP36L1_Down
203702_s_at	0.000202	2.16e-05	4.35233	2.2418	1.0939	TTLL4	tubulin tyrosine ligase like 4	Up	TTLL4_Up
207687_at	0.000203	2.17e-05	-4.35094	2.23633	-1.07007	INHBC	inhibin beta C subunit	Down	INHBC_Down
208949_s_at	0.000204	2.17e-05	4.35032	2.2339	1.60096	LGALS3	lectin, galactoside binding soluble 3	Up	LGALS3_Up
206606_at	0.000204	2.18e-05	-4.35003	2.23275	-1.5798	LIPC	lipase C, hepatic type	Down	LIPC_Down
225973_at	0.000209	2.25e-05	4.34246	2.20305	1.14232	TAP2	transporter 2, ATP binding cassette subfamily B member	Up	TAP2_Up
205909_at	0.00021	2.25e-05	4.34157	2.19957	1.25506	POLE2	DNA polymerase epsilon 2, accessory subunit	Up	POLE2_Up
206211_at	0.000211	2.28e-05	-4.33924	2.19041	-1.30459	SELE	selectin E	Down	SELE_Down
202307_s_at	0.000215	2.32e-05	4.33495	2.1736	1.02028	TAP1	transporter 1, ATP binding cassette subfamily B member	Up	TAP1_Up
206514_s_at	0.000217	2.35e-05	-4.33157	2.16037	-1.56909	CYP4F2///CYP4F3	cytochrome P450 family 4 subfamily F member 2///cytochrome P450 family 4 subfamily F member 3	Down	CYP4F2///CYP4F3_Down
205371_s_at	0.000223	2.43e-05	-4.32396	2.13061	-1.16747	DBT	dihydrolipoamide branched chain transacylase E2	Down	DBT_Down
1553186_x_at	0.000224	2.44e-05	4.32281	2.12613	1.34105	RASEF	RAS and EF-hand domain containing	Up	RASEF_Up
213712_at	0.000225	2.46e-05	4.32081	2.11832	1.30125	ELOVL2	ELOVL fatty acid elongase 2	Up	ELOVL2_Up
203548_s_at	0.000226	2.47e-05	4.31934	2.11256	1.19934	LPL	lipoprotein lipase	Up	LPL_Up
213874_at	0.00023	2.52e-05	-4.31494	2.09538	-1.66686	SERPINA4	serpin family A member 4	Down	SERPINA4_Down
210390_s_at	0.00023	2.52e-05	4.31437	2.09318	1.29506	CCL15-CCL14///CCL15	CCL15-CCL14 readthrough (NMD candidate)///C-C motif chemokine ligand 15	Up	CCL15-CCL14///CCL15_Up
236621_at	0.000235	2.59e-05	-4.30813	2.06883	-1.27249	RPS27	ribosomal protein S27	Down	RPS27_Down
204999_s_at	0.000244	2.7e-05	-4.29757	2.02773	-2.1657	ATF5	activating transcription factor 5	Down	ATF5_Down
203305_at	0.000249	2.77e-05	4.29178	2.00522	1.35277	F13A1	coagulation factor XIII A chain	Up	F13A1_Up
221841_s_at	0.000249	2.77e-05	-4.29155	2.00431	-1.58142	KLF4	Kruppel like factor 4	Down	KLF4_Down
210889_s_at	0.000252	2.81e-05	-4.28828	1.99163	-1.62473	FCGR2B	Fc fragment of IgG receptor IIb	Down	FCGR2B_Down
211548_s_at	0.000254	2.84e-05	-4.28605	1.98297	-2.85354	HPGD	hydroxyprostaglandin dehydrogenase 15-(NAD)	Down	HPGD_Down
231773_at	0.00026	2.92e-05	-4.279	1.95563	-1.36936	ANGPTL1	angiopoietin like 1	Down	ANGPTL1_Down
209122_at	0.000262	2.95e-05	-4.27685	1.94733	-1.06943	PLIN2	perilipin 2	Down	PLIN2_Down
206119_at	0.000263	2.96e-05	-4.27591	1.94367	-2.16729	BHMT	betaine--homocysteine S-methyltransferase	Down	BHMT_Down
205609_at	0.000264	2.98e-05	4.27438	1.93776	1.11356	ANGPT1	angiopoietin 1	Up	ANGPT1_Up
205110_s_at	0.000267	3.01e-05	4.2716	1.92698	2.04429	FGF13	fibroblast growth factor 13	Up	FGF13_Up
218322_s_at	0.000273	3.1e-05	-4.26426	1.89862	-1.37769	ACSL5	acyl-CoA synthetase long-chain family member 5	Down	ACSL5_Down
212122_at	0.000273	3.1e-05	4.26426	1.8986	1.03251	RHOQ	ras homolog family member Q	Up	RHOQ_Up
213010_at	0.000276	3.14e-05	4.26145	1.88776	1.02268	PRKCDBP	protein kinase C delta binding protein	Up	PRKCDBP_Up
212415_at	0.000278	3.17e-05	4.25917	1.87894	1.15719	SEPT6	septin 6	Up	SEPT6_Up
210452_x_at	0.000288	3.3e-05	-4.24908	1.84005	-1.55273	CYP4F2	cytochrome P450 family 4 subfamily F member 2	Down	CYP4F2_Down
227702_at	0.000288	3.31e-05	-4.24862	1.83828	-1.35868	CYP4X1	cytochrome P450 family 4 subfamily X member 1	Down	CYP4X1_Down
205221_at	0.000292	3.36e-05	-4.24469	1.82315	-1.35447	HGD	homogentisate 1,2-dioxygenase	Down	HGD_Down
203820_s_at	0.000294	3.39e-05	4.24272	1.81554	2.48975	IGF2BP3	insulin like growth factor 2 mRNA binding protein 3	Up	IGF2BP3_Up
214478_at	0.0003	3.46e-05	-4.23736	1.79495	-2.28427	SPP2	secreted phosphoprotein 2	Down	SPP2_Down
203828_s_at	0.000301	3.48e-05	4.23584	1.7891	1.47588	IL32	interleukin 32	Up	IL32_Up
218162_at	0.000301	3.49e-05	-4.23547	1.7877	-1.32119	OLFML3	olfactomedin like 3	Down	OLFML3_Down
204279_at	0.000304	3.52e-05	4.23343	1.77985	1.29776	PSMB9	proteasome subunit beta 9	Up	PSMB9_Up
221729_at	0.000304	3.52e-05	4.2333	1.77934	1.37625	COL5A2	collagen type V alpha 2 chain	Up	COL5A2_Up
224336_s_at	0.000311	3.61e-05	-4.22689	1.75474	-1.03007	DUSP16	dual specificity phosphatase 16	Down	DUSP16_Down
210013_at	0.000313	3.65e-05	-4.22428	1.74475	-1.58964	HPX	hemopexin	Down	HPX_Down
244677_at	0.000316	3.69e-05	-4.22145	1.7339	-1.17088	MIR6883///PER1	microRNA 6883///period circadian clock 1	Down	MIR6883///PER1_Down
207097_s_at	0.000317	3.7e-05	-4.22092	1.73185	-1.81645	SLC17A2	solute carrier family 17 member 2	Down	SLC17A2_Down
210888_s_at	0.000317	3.71e-05	-4.22064	1.73078	-1.18512	ITIH1	inter-alpha-trypsin inhibitor heavy chain 1	Down	ITIH1_Down
203726_s_at	0.000319	3.74e-05	4.21844	1.72238	1.64658	LAMA3	laminin subunit alpha 3	Up	LAMA3_Up
223366_at	0.000322	3.78e-05	4.21607	1.71329	1.13893	ZNF704	zinc finger protein 704	Up	ZNF704_Up
222457_s_at	0.000322	3.78e-05	4.21551	1.71113	1.17012	LIMA1	LIM domain and actin binding 1	Up	LIMA1_Up
211715_s_at	0.000324	3.82e-05	-4.21337	1.70298	-1.29724	BDH1	3-hydroxybutyrate dehydrogenase, type 1	Down	BDH1_Down
205478_at	0.00033	3.91e-05	-4.20772	1.68138	-1.96629	PPP1R1A	protein phosphatase 1 regulatory inhibitor subunit 1A	Down	PPP1R1A_Down
206256_at	0.000334	3.96e-05	-4.20411	1.66758	-1.31196	CPN1	carboxypeptidase N subunit 1	Down	CPN1_Down
238625_at	0.000339	4.03e-05	-4.20009	1.65224	-1.55123	C1orf168	chromosome 1 open reading frame 168	Down	C1orf168_Down
202351_at	0.00034	4.05e-05	4.19876	1.64715	1.13693	ITGAV	integrin subunit alpha V	Up	ITGAV_Up
214039_s_at	0.000344	4.11e-05	4.19535	1.63415	1.40296	LAPTM4B	lysosomal protein transmembrane 4 beta	Up	LAPTM4B_Up
230271_at	0.00035	4.19e-05	4.19062	1.61614	1.06933	ONECUT2	one cut homeobox 2	Up	ONECUT2_Up
214734_at	0.000352	4.22e-05	-4.18881	1.60926	-2.02264	EXPH5	exophilin 5	Down	EXPH5_Down
203058_s_at	0.000353	4.23e-05	-4.18794	1.60594	-1.01429	PAPSS2	3'-phosphoadenosine 5'-phosphosulfate synthase 2	Down	PAPSS2_Down
210387_at	0.000358	4.31e-05	4.18326	1.58814	1.37439	HIST1H2BJ///HIST1H2BG	histone cluster 1, H2bj///histone cluster 1, H2bg	Up	HIST1H2BJ///HIST1H2BG_Up
237248_at	0.000361	4.36e-05	-4.18056	1.57785	-1.42803	PDE11A	phosphodiesterase 11A	Down	PDE11A_Down
203632_s_at	0.000367	4.44e-05	4.17605	1.56074	1.34361	GPRC5B	G protein-coupled receptor class C group 5 member B	Up	GPRC5B_Up
209457_at	0.000369	4.47e-05	-4.1743	1.55409	-1.26636	DUSP5	dual specificity phosphatase 5	Down	DUSP5_Down
201136_at	0.00037	4.5e-05	4.17304	1.54931	1.13076	PLP2	proteolipid protein 2	Up	PLP2_Up
238440_at	0.000372	4.52e-05	-4.17169	1.54418	-1.0456	CLYBL	citrate lyase beta like	Down	CLYBL_Down
205728_at	0.0004	4.91e-05	-4.15088	1.46541	-1.8184	TENM1	teneurin transmembrane protein 1	Down	TENM1_Down
210652_s_at	0.000406	5e-05	4.14649	1.44883	1.53219	TTC39A	tetratricopeptide repeat domain 39A	Up	TTC39A_Up
211224_s_at	0.000406	5e-05	-4.14646	1.44871	-1.51494	ABCB11	ATP binding cassette subfamily B member 11	Down	ABCB11_Down
205229_s_at	0.000409	5.05e-05	4.14418	1.4401	2.15771	COCH	cochlin	Up	COCH_Up
201667_at	0.000412	5.09e-05	4.14199	1.43182	1.30652	GJA1	gap junction protein alpha 1	Up	GJA1_Up
202992_at	0.000421	5.22e-05	-4.13573	1.40826	-2.28747	C7	complement component 7	Down	C7_Down
203015_s_at	0.000424	5.27e-05	4.13354	1.39999	1.05101	SSX2IP	SSX family member 2 interacting protein	Up	SSX2IP_Up
1558010_s_at	0.000439	5.49e-05	-4.12319	1.36108	-1.49967	SLC1A2	solute carrier family 1 member 2	Down	SLC1A2_Down
218217_at	0.000454	5.74e-05	4.11215	1.31967	1.19805	SCPEP1	serine carboxypeptidase 1	Up	SCPEP1_Up
227862_at	0.000455	5.76e-05	4.11129	1.31641	1.6632	TRNP1	TMF1-regulated nuclear protein 1	Up	TRNP1_Up
207883_s_at	0.000467	5.94e-05	-4.10365	1.28782	-1.13907	TFR2	transferrin receptor 2	Down	TFR2_Down
205259_at	0.000473	6.03e-05	-4.09957	1.27256	-1.01014	NR3C2	nuclear receptor subfamily 3 group C member 2	Down	NR3C2_Down
204388_s_at	0.000475	6.06e-05	-4.09847	1.26846	-1.0464	MAOA	monoamine oxidase A	Down	MAOA_Down
210163_at	0.000476	6.09e-05	4.09742	1.26453	1.70375	CXCL11	C-X-C motif chemokine ligand 11	Up	CXCL11_Up
227379_at	0.000477	6.1e-05	4.09695	1.26278	1.10254	MBOAT1	membrane bound O-acyltransferase domain containing 1	Up	MBOAT1_Up
213906_at	0.00048	6.15e-05	4.09493	1.25522	1.201	MYBL1	MYB proto-oncogene like 1	Up	MYBL1_Up
219703_at	0.000481	6.16e-05	4.0943	1.25288	1.49984	MNS1	meiosis specific nuclear structural 1	Up	MNS1_Up
212816_s_at	0.000491	6.3e-05	-4.08862	1.23165	-1.33031	CBS	cystathionine-beta-synthase	Down	CBS_Down
202831_at	0.000491	6.31e-05	4.08838	1.23078	1.88962	GPX2	glutathione peroxidase 2	Up	GPX2_Up
225207_at	0.000493	6.35e-05	-4.08691	1.2253	-1.68305	PDK4	pyruvate dehydrogenase kinase 4	Down	PDK4_Down
1559033_at	0.000498	6.42e-05	-4.08389	1.21404	-1.77725	LINC01018	long intergenic non-protein coding RNA 1018	Down	LINC01018_Down
218853_s_at	0.000505	6.53e-05	4.07955	1.19785	1.06215	MOSPD1	motile sperm domain containing 1	Up	MOSPD1_Up
201251_at	0.00051	6.62e-05	4.07638	1.18608	1.37201	PKM	pyruvate kinase, muscle	Up	PKM_Up
210056_at	0.000511	6.63e-05	-4.07585	1.1841	-1.02032	RND1	Rho family GTPase 1	Down	RND1_Down
229299_at	0.000514	6.69e-05	-4.0736	1.17573	-1.19747	NADK2	NAD kinase 2, mitochondrial	Down	NADK2_Down
230830_at	0.000533	6.99e-05	4.06253	1.13459	1.4081	SLC51B	solute carrier family 51 beta subunit	Up	SLC51B_Up
235061_at	0.000534	7.01e-05	-4.06178	1.13183	-1.20691	PPM1K	protein phosphatase, Mg2+/Mn2+ dependent 1K	Down	PPM1K_Down
207096_at	0.00054	7.12e-05	-4.05782	1.11714	-1.94048	SAA2-SAA4///SAA4	SAA2-SAA4 readthrough///serum amyloid A4, constitutive	Down	SAA2-SAA4///SAA4_Down
225803_at	0.000547	7.21e-05	4.05457	1.1051	1.05237	FBXO32	F-box protein 32	Up	FBXO32_Up
205559_s_at	0.000552	7.31e-05	4.0513	1.09297	1.096	PCSK5	proprotein convertase subtilisin/kexin type 5	Up	PCSK5_Up
33323_r_at	0.000554	7.34e-05	4.05022	1.08899	2.06903	SFN	stratifin	Up	SFN_Up
207202_s_at	0.000555	7.35e-05	-4.04977	1.08731	-1.47581	NR1I2	nuclear receptor subfamily 1 group I member 2	Down	NR1I2_Down
205352_at	0.000557	7.38e-05	4.04862	1.08308	1.30158	SERPINI1	serpin family I member 1	Up	SERPINI1_Up
206172_at	0.000568	7.55e-05	-4.04299	1.06225	-1.6309	IL13RA2	interleukin 13 receptor subunit alpha 2	Down	IL13RA2_Down
202112_at	0.00058	7.74e-05	4.03683	1.03952	1.27391	VWF	von Willebrand factor	Up	VWF_Up
230624_at	0.000588	7.87e-05	-4.03255	1.02372	-1.03188	SLC25A27	solute carrier family 25 member 27	Down	SLC25A27_Down
201141_at	0.000593	7.96e-05	4.02969	1.01317	1.39484	GPNMB	glycoprotein nmb	Up	GPNMB_Up
203131_at	0.000598	8.05e-05	-4.02681	1.00255	-2.01732	PDGFRA	platelet derived growth factor receptor alpha	Down	PDGFRA_Down
210272_at	0.0006	8.08e-05	-4.0258	0.99885	-1.79203	CYP2B7P	cytochrome P450 family 2 subfamily B member 7, pseudogene	Down	CYP2B7P_Down
211110_s_at	0.000606	8.17e-05	-4.02293	0.98827	-1.3226	AR	androgen receptor	Down	AR_Down
222925_at	0.000607	8.19e-05	4.02225	0.9858	1.92372	DCDC2	doublecortin domain containing 2	Up	DCDC2_Up
213924_at	0.000608	8.21e-05	4.02161	0.98342	1.18848	GNAL	G protein subunit alpha L	Up	GNAL_Up
204719_at	0.000612	8.28e-05	-4.01961	0.97607	-2.26996	ABCA8	ATP binding cassette subfamily A member 8	Down	ABCA8_Down
227484_at	0.000621	8.43e-05	4.01495	0.95895	1.00045	SRGAP1	SLIT-ROBO Rho GTPase activating protein 1	Up	SRGAP1_Up
229656_s_at	0.000634	8.63e-05	4.00889	0.93671	1.03854	EML6	echinoderm microtubule associated protein like 6	Up	EML6_Up
219888_at	0.000636	8.67e-05	4.00792	0.93316	1.05359	SPAG4	sperm associated antigen 4	Up	SPAG4_Up
204017_at	0.000643	8.78e-05	4.00448	0.92053	1.4299	KDELR3	KDEL endoplasmic reticulum protein retention receptor 3	Up	KDELR3_Up
208147_s_at	0.000644	8.79e-05	-4.00416	0.91936	-2.40955	CYP2C8	cytochrome P450 family 2 subfamily C member 8	Down	CYP2C8_Down
205393_s_at	0.000646	8.84e-05	4.00278	0.9143	1.00367	CHEK1	checkpoint kinase 1	Up	CHEK1_Up
223820_at	0.000648	8.87e-05	-4.00197	0.91132	-1.35401	RBP5	retinol binding protein 5	Down	RBP5_Down
210519_s_at	0.000649	8.89e-05	4.00124	0.90867	2.97433	NQO1	NAD(P)H quinone dehydrogenase 1	Up	NQO1_Up
213262_at	0.000671	9.26e-05	3.99086	0.87069	1.12144	SACS	sacsin molecular chaperone	Up	SACS_Up
202409_at	0.000672	9.28e-05	-3.99033	0.86876	-3.17941	INS-IGF2///IGF2	INS-IGF2 readthrough///insulin like growth factor 2	Down	INS-IGF2///IGF2_Down
221523_s_at	0.000677	9.36e-05	3.98817	0.86084	1.33883	RRAGD	Ras related GTP binding D	Up	RRAGD_Up
216696_s_at	0.000679	9.39e-05	-3.98722	0.8574	-1.07326	PRODH2	proline dehydrogenase 2	Down	PRODH2_Down
212335_at	0.000682	9.45e-05	3.98562	0.85153	1.01904	GNS	glucosamine (N-acetyl)-6-sulfatase	Up	GNS_Up
205158_at	0.000716	0.0001	-3.9711	0.79862	-1.24153	RNASE4	ribonuclease A family member 4	Down	RNASE4_Down
228844_at	0.000724	0.000102	-3.96727	0.7847	-1.86172	SLC13A5	solute carrier family 13 member 5	Down	SLC13A5_Down
207173_x_at	0.000727	0.000102	3.96627	0.78104	1.75372	CDH11	cadherin 11	Up	CDH11_Up
223204_at	0.000732	0.000103	3.9638	0.77208	1.04195	FAM198B	family with sequence similarity 198 member B	Up	FAM198B_Up
204205_at	0.000736	0.000104	3.96196	0.76538	1.12021	APOBEC3G	apolipoprotein B mRNA editing enzyme catalytic subunit 3G	Up	APOBEC3G_Up
211597_s_at	0.000736	0.000104	3.9619	0.76518	1.01544	HOPX	HOP homeobox	Up	HOPX_Up
208937_s_at	0.000744	0.000105	-3.95857	0.75307	-1.59655	ID1	inhibitor of DNA binding 1, HLH protein	Down	ID1_Down
214837_at	0.000789	0.000113	-3.94005	0.68599	-1.51432	ALB	albumin	Down	ALB_Down
227370_at	0.000802	0.000115	3.93507	0.66798	1.01018	FAM171B	family with sequence similarity 171 member B	Up	FAM171B_Up
205328_at	0.000803	0.000115	-3.93439	0.66553	-1.01835	CLDN10	claudin 10	Down	CLDN10_Down
225639_at	0.000814	0.000117	3.93007	0.64994	1.0124	SKAP2	src kinase associated phosphoprotein 2	Up	SKAP2_Up
226269_at	0.000818	0.000118	3.92835	0.64376	1.35535	GDAP1	ganglioside induced differentiation associated protein 1	Up	GDAP1_Up
202746_at	0.000838	0.000121	3.92103	0.61737	1.6032	ITM2A	integral membrane protein 2A	Up	ITM2A_Up
219410_at	0.000841	0.000122	-3.9199	0.61329	-2.03633	TMEM45A	transmembrane protein 45A	Down	TMEM45A_Down
227372_s_at	0.000844	0.000122	3.91873	0.6091	1.18694	BAIAP2L1	BAI1 associated protein 2 like 1	Up	BAIAP2L1_Up
209071_s_at	0.000845	0.000123	3.91852	0.60834	1.15135	RGS5	regulator of G-protein signaling 5	Up	RGS5_Up
1552701_a_at	0.000876	0.000128	3.9074	0.56838	1.12341	CARD16	caspase recruitment domain family member 16	Up	CARD16_Up
204537_s_at	0.000879	0.000129	3.906	0.56334	1.29191	MIR452///MIR224///GABRE	microRNA 452///microRNA 224///gamma-aminobutyric acid type A receptor epsilon subunit	Up	MIR452///MIR224///GABRE_Up
213310_at	0.000889	0.00013	3.90234	0.55024	1.01555	CASC7///AGO2	cancer susceptibility candidate 7 (non-protein coding)///argonaute 2, RISC catalytic component	Up	CASC7///AGO2_Up
205079_s_at	0.000899	0.000132	-3.89908	0.53855	-1.10453	MPDZ	multiple PDZ domain crumbs cell polarity complex component	Down	MPDZ_Down
219502_at	0.000899	0.000132	3.89899	0.53823	1.08968	NEIL3	nei like DNA glycosylase 3	Up	NEIL3_Up
1569582_at	0.000903	0.000133	-3.89739	0.53249	-1.33666	AADACP1	arylacetamide deacetylase pseudogene 1	Down	AADACP1_Down
206743_s_at	0.000909	0.000134	-3.89512	0.52435	-1.04213	ASGR1	asialoglycoprotein receptor 1	Down	ASGR1_Down
219630_at	0.000917	0.000135	3.89254	0.51513	2.46773	PDZK1IP1	PDZK1 interacting protein 1	Up	PDZK1IP1_Up
224747_at	0.000924	0.000137	3.88993	0.50578	1.31727	UBE2Q2	ubiquitin conjugating enzyme E2 Q2	Up	UBE2Q2_Up
228221_at	0.000942	0.00014	3.8841	0.48494	1.33906	SLC44A3	solute carrier family 44 member 3	Up	SLC44A3_Up
205222_at	0.000944	0.00014	-3.88328	0.48203	-1.2877	EHHADH	enoyl-CoA, hydratase/3-hydroxyacyl CoA dehydrogenase	Down	EHHADH_Down
223062_s_at	0.000962	0.000143	-3.87769	0.46208	-1.36561	PSAT1	phosphoserine aminotransferase 1	Down	PSAT1_Down
220224_at	0.000969	0.000145	-3.8754	0.45392	-1.42069	HAO1	hydroxyacid oxidase 1	Down	HAO1_Down
224937_at	0.000969	0.000145	3.87522	0.45328	1.05799	PTGFRN	prostaglandin F2 receptor inhibitor	Up	PTGFRN_Up
203697_at	0.000972	0.000145	3.87432	0.45008	1.21732	FRZB	frizzled-related protein	Up	FRZB_Up
202411_at	0.000988	0.000148	3.86884	0.43054	2.26113	IFI27	interferon alpha inducible protein 27	Up	IFI27_Up
225626_at	0.001	0.000151	3.86366	0.41214	1.43173	PAG1	phosphoprotein membrane anchor with glycosphingolipid microdomains 1	Up	PAG1_Up
209406_at	0.001	0.000152	3.86316	0.41034	1.1615	BAG2	BCL2 associated athanogene 2	Up	BAG2_Up
230494_at	0.00102	0.000155	-3.85755	0.39043	-1.40418	SLC20A1	solute carrier family 20 member 1	Down	SLC20A1_Down
206574_s_at	0.00103	0.000155	3.85655	0.38687	1.07598	PTP4A3	protein tyrosine phosphatase type IVA, member 3	Up	PTP4A3_Up
227081_at	0.00103	0.000157	-3.85345	0.37587	-1.13433	DNALI1	dynein axonemal light intermediate chain 1	Down	DNALI1_Down
219970_at	0.00105	0.000161	-3.84771	0.35554	-1.20298	GIPC2	GIPC PDZ domain containing family member 2	Down	GIPC2_Down
220075_s_at	0.00106	0.000161	-3.84701	0.35304	-1.63658	CDHR5	cadherin related family member 5	Down	CDHR5_Down
208116_s_at	0.00108	0.000164	-3.84179	0.33455	-1.23412	MAN1A1	mannosidase alpha class 1A member 1	Down	MAN1A1_Down
241869_at	0.00108	0.000166	-3.83963	0.32692	-1.37548	APOL6	apolipoprotein L6	Down	APOL6_Down
218688_at	0.00108	0.000166	-3.83941	0.32616	-1.11348	TKFC	triokinase and FMN cyclase	Down	TKFC_Down
205141_at	0.00108	0.000166	-3.83931	0.32579	-1.36275	ANG	angiogenin	Down	ANG_Down
229700_at	0.00109	0.000166	3.83848	0.32286	1.20555	ZNF738	zinc finger protein 738	Up	ZNF738_Up
218847_at	0.00109	0.000167	3.83761	0.31978	1.77114	IGF2BP2	insulin like growth factor 2 mRNA binding protein 2	Up	IGF2BP2_Up
1558815_at	0.00111	0.000171	-3.83078	0.29566	-1.01956	SORBS2	sorbin and SH3 domain containing 2	Down	SORBS2_Down
203963_at	0.00112	0.000173	3.8283	0.28692	1.75351	CA12	carbonic anhydrase 12	Up	CA12_Up
223170_at	0.00113	0.000174	3.82732	0.28345	1.19605	TMEM98	transmembrane protein 98	Up	TMEM98_Up
204462_s_at	0.00114	0.000177	-3.82276	0.26739	-1.14487	SLC16A2	solute carrier family 16 member 2	Down	SLC16A2_Down
1552389_at	0.00115	0.000178	3.82008	0.25796	1.82249	ERICH5	glutamate rich 5	Up	ERICH5_Up
226623_at	0.00117	0.000183	3.8138	0.23585	1.11145	PHYHIPL	phytanoyl-CoA 2-hydroxylase interacting protein like	Up	PHYHIPL_Up
207544_s_at	0.00117	0.000183	-3.81345	0.23464	-1.59044	ADH6	alcohol dehydrogenase 6 (class V)	Down	ADH6_Down
207156_at	0.00118	0.000185	3.81076	0.22518	1.42787	HIST1H2AH///HIST1H2AG///HIST1H2AM///HIST1H2AL///HIST1H2AK///HIST1H2AI	histone cluster 1, H2ah///histone cluster 1, H2ag///histone cluster 1, H2am///histone cluster 1, H2al///histone cluster 1, H2ak///histone cluster 1, H2ai	Up	HIST1H2AH///HIST1H2AG///HIST1H2AM///HIST1H2AL///HIST1H2AK///HIST1H2AI_Up
205483_s_at	0.00121	0.000189	3.80512	0.20539	1.18714	ISG15	ISG15 ubiquitin-like modifier	Up	ISG15_Up
204272_at	0.00121	0.00019	3.80395	0.20126	2.186	LGALS4	galectin 4	Up	LGALS4_Up
220751_s_at	0.00122	0.000192	-3.80082	0.1903	-1.06382	FAXDC2	fatty acid hydroxylase domain containing 2	Down	FAXDC2_Down
209135_at	0.00123	0.000193	3.79924	0.18475	1.04918	ASPH	aspartate beta-hydroxylase	Up	ASPH_Up
217022_s_at	0.00125	0.000198	-3.79247	0.16106	-2.11816	IGHA2///IGHA1///IGH	immunoglobulin heavy constant alpha 2 (A2m marker)///immunoglobulin heavy constant alpha 1///immunoglobulin heavy locus	Down	IGHA2///IGHA1///IGH_Down
227226_at	0.00127	0.0002	3.78908	0.14921	1.22467	MRAP2	melanocortin 2 receptor accessory protein 2	Up	MRAP2_Up
203434_s_at	0.0013	0.000207	-3.78053	0.11935	-2.26337	MME	membrane metallo-endopeptidase	Down	MME_Down
222016_s_at	0.0013	0.000207	3.78001	0.11752	1.28836	ZSCAN31	zinc finger and SCAN domain containing 31	Up	ZSCAN31_Up
218856_at	0.00132	0.00021	3.77637	0.10482	1.15914	TNFRSF21	TNF receptor superfamily member 21	Up	TNFRSF21_Up
200974_at	0.00134	0.000215	3.77043	0.08415	1.05126	ACTA2	actin, alpha 2, smooth muscle, aorta	Up	ACTA2_Up
225647_s_at	0.00135	0.000217	3.76832	0.07681	1.6733	CTSC	cathepsin C	Up	CTSC_Up
209976_s_at	0.00138	0.000222	-3.7613	0.05237	-3.14551	CYP2E1	cytochrome P450 family 2 subfamily E member 1	Down	CYP2E1_Down
1559363_at	0.0014	0.000226	-3.75684	0.03691	-1.02992	LINC01146	long intergenic non-protein coding RNA 1146	Down	LINC01146_Down
223278_at	0.00142	0.00023	-3.75191	0.0198	-1.3027	GJB2	gap junction protein beta 2	Down	GJB2_Down
216238_s_at	0.00143	0.000234	-3.74776	0.00542	-1.24229	FGB	fibrinogen beta chain	Down	FGB_Down
207218_at	0.00144	0.000236	-3.7456	-0.00205	-2.30698	F9	coagulation factor IX	Down	F9_Down
222830_at	0.00146	0.000238	-3.74314	-0.01057	-1.01772	GRHL1	grainyhead like transcription factor 1	Down	GRHL1_Down
205830_at	0.00147	0.000241	3.7399	-0.02176	1.96849	CLGN	calmegin	Up	CLGN_Up
206741_at	0.00147	0.000242	3.73921	-0.02416	1.00161	SSUH2	ssu-2 homolog (C. elegans)	Up	SSUH2_Up
219181_at	0.00149	0.000244	-3.73624	-0.03441	-1.34924	LIPG	lipase G, endothelial type	Down	LIPG_Down
207325_x_at	0.00149	0.000245	3.73555	-0.03679	1.80981	MAGEA1	MAGE family member A1	Up	MAGEA1_Up
207185_at	0.00149	0.000246	-3.73457	-0.04019	-2.14475	SLC10A1	solute carrier family 10 member 1	Down	SLC10A1_Down
238778_at	0.00151	0.000249	3.73069	-0.05356	1.3998	MPP7	membrane palmitoylated protein 7	Up	MPP7_Up
214043_at	0.00153	0.000252	-3.72723	-0.0655	-1.54825	PTPRD	protein tyrosine phosphatase, receptor type D	Down	PTPRD_Down
213975_s_at	0.00155	0.000258	3.72178	-0.08429	1.5408	LYZ	lysozyme	Up	LYZ_Up
205082_s_at	0.00157	0.00026	-3.71879	-0.09456	-1.71293	AOX1	aldehyde oxidase 1	Down	AOX1_Down
225081_s_at	0.00157	0.000261	3.71878	-0.09459	1.18393	CDCA7L	cell division cycle associated 7 like	Up	CDCA7L_Up
208471_at	0.00159	0.000266	-3.71338	-0.11315	-1.80442	HPR	haptoglobin-related protein	Down	HPR_Down
205627_at	0.00161	0.000269	-3.7101	-0.12442	-1.22656	CDA	cytidine deaminase	Down	CDA_Down
240383_at	0.00161	0.00027	-3.70959	-0.12617	-1.2661	UBE2D3	ubiquitin conjugating enzyme E2 D3	Down	UBE2D3_Down
228121_at	0.00163	0.000274	3.70524	-0.14109	1.05707	TGFB2	transforming growth factor beta 2	Up	TGFB2_Up
219404_at	0.00163	0.000275	3.70419	-0.14468	1.17368	EPS8L3	EPS8 like 3	Up	EPS8L3_Up
204818_at	0.00163	0.000275	-3.70417	-0.14477	-1.57328	HSD17B2	hydroxysteroid 17-beta dehydrogenase 2	Down	HSD17B2_Down
220148_at	0.00169	0.000286	-3.69335	-0.18181	-1.67807	ALDH8A1	aldehyde dehydrogenase 8 family member A1	Down	ALDH8A1_Down
209581_at	0.00169	0.000286	-3.69314	-0.18252	-1.17212	PLA2G16	phospholipase A2 group XVI	Down	PLA2G16_Down
207256_at	0.00169	0.000287	-3.69218	-0.18582	-1.8049	MBL2	mannose binding lectin 2	Down	MBL2_Down
213139_at	0.0017	0.000288	3.69135	-0.18866	1.42797	SNAI2	snail family transcriptional repressor 2	Up	SNAI2_Up
210366_at	0.00171	0.00029	-3.68946	-0.19511	-1.54529	SLCO1B1	solute carrier organic anion transporter family member 1B1	Down	SLCO1B1_Down
220626_at	0.00172	0.000294	-3.68625	-0.20606	-1.02481	SERPINA10	serpin family A member 10	Down	SERPINA10_Down
205753_at	0.00175	0.000298	-3.68232	-0.21948	-2.88564	CRP	C-reactive protein, pentraxin-related	Down	CRP_Down
235296_at	0.00175	0.000299	3.68175	-0.22141	1.40212	EIF5A2	eukaryotic translation initiation factor 5A2	Up	EIF5A2_Up
220736_at	0.00177	0.000302	-3.67866	-0.23194	-1.01263	SLC19A3	solute carrier family 19 member 3	Down	SLC19A3_Down
204997_at	0.00178	0.000304	-3.67659	-0.239	-1.02197	GPD1	glycerol-3-phosphate dehydrogenase 1	Down	GPD1_Down
236725_at	0.00178	0.000306	-3.67524	-0.2436	-1.02845	WWC1	WW and C2 domain containing 1	Down	WWC1_Down
242837_at	0.00179	0.000308	-3.67361	-0.24916	-1.05515	SRSF4	serine and arginine rich splicing factor 4	Down	SRSF4_Down
235763_at	0.00179	0.000308	3.67312	-0.25081	1.98284	SLC44A5	solute carrier family 44 member 5	Up	SLC44A5_Up
52255_s_at	0.00181	0.000311	3.67086	-0.25851	1.00708	COL5A3	collagen type V alpha 3 chain	Up	COL5A3_Up
230570_at	0.00185	0.000321	3.66231	-0.28754	1.12516	EIF3H	eukaryotic translation initiation factor 3 subunit H	Up	EIF3H_Up
205633_s_at	0.00186	0.000323	-3.66024	-0.29457	-1.04929	ALAS1	5'-aminolevulinate synthase 1	Down	ALAS1_Down
234983_at	0.00188	0.000327	3.6572	-0.3049	1.07896	C12orf49	chromosome 12 open reading frame 49	Up	C12orf49_Up
227874_at	0.00189	0.000329	3.65556	-0.31044	1.03308	EMCN	endomucin	Up	EMCN_Up
227123_at	0.0019	0.000331	3.65342	-0.3177	1.08598	RAB3B	RAB3B, member RAS oncogene family	Up	RAB3B_Up
206110_at	0.00192	0.000335	3.65001	-0.32923	1.13453	HIST1H3F///HIST1H3B///HIST1H3H///HIST1H3J///HIST1H3G///HIST1H3I///HIST1H3E///HIST1H3C///HIST1H3D///HIST1H3A	histone cluster 1, H3f///histone cluster 1, H3b///histone cluster 1, H3h///histone cluster 1, H3j///histone cluster 1, H3g///histone cluster 1, H3i///histone cluster 1, H3e///histone cluster 1, H3c///histone cluster 1, H3d///histone cluster 1, H3a	Up	HIST1H3F///HIST1H3B///HIST1H3H///HIST1H3J///HIST1H3G///HIST1H3I///HIST1H3E///HIST1H3C///HIST1H3D///HIST1H3A_Up
212964_at	0.00197	0.000347	3.64042	-0.36166	1.07711	HIC2	hypermethylated in cancer 2	Up	HIC2_Up
223467_at	0.002	0.000354	-3.63508	-0.37969	-1.15765	RASD1	ras related dexamethasone induced 1	Down	RASD1_Down
209031_at	0.00201	0.000356	3.63365	-0.38449	1.09674	CADM1	cell adhesion molecule 1	Up	CADM1_Up
232494_at	0.00204	0.000361	-3.62949	-0.3985	-2.33534	CYP8B1	cytochrome P450 family 8 subfamily B member 1	Down	CYP8B1_Down
207345_at	0.00205	0.000365	-3.62709	-0.4066	-1.45187	FST	follistatin	Down	FST_Down
201801_s_at	0.00206	0.000365	3.62643	-0.40883	1.00393	SLC29A1	solute carrier family 29 member 1 (Augustine blood group)	Up	SLC29A1_Up
89977_at	0.00209	0.000372	-3.6213	-0.42608	-1.59365	ACSM5	acyl-CoA synthetase medium-chain family member 5	Down	ACSM5_Down
209257_s_at	0.00211	0.000376	3.6187	-0.43481	1.184	SMC3	structural maintenance of chromosomes 3	Up	SMC3_Up
223587_s_at	0.00213	0.000381	-3.6147	-0.44824	-1.06528	AMN	amnion associated transmembrane protein	Down	AMN_Down
212909_at	0.0022	0.000396	3.60404	-0.48398	1.07358	LYPD1	LY6/PLAUR domain containing 1	Up	LYPD1_Up
206698_at	0.0022	0.000397	3.6037	-0.4851	1.70114	XK	X-linked Kx blood group	Up	XK_Up
227828_s_at	0.00221	0.000398	-3.60279	-0.48815	-1.00309	EVA1A	eva-1 homolog A, regulator of programmed cell death	Down	EVA1A_Down
235343_at	0.00223	0.000405	3.59822	-0.50341	1.36499	VASH2	vasohibin 2	Up	VASH2_Up
238447_at	0.00225	0.000409	-3.59515	-0.51368	-1.26205	RBMS3	RNA binding motif single stranded interacting protein 3	Down	RBMS3_Down
235174_s_at	0.00226	0.000409	3.59491	-0.51449	1.06058	LINC01003	long intergenic non-protein coding RNA 1003	Up	LINC01003_Up
230318_at	0.00227	0.000413	-3.59278	-0.52159	-1.14678	SERPINA1	serpin family A member 1	Down	SERPINA1_Down
205790_at	0.00238	0.000437	-3.57695	-0.57433	-1.01171	SKAP1	src kinase associated phosphoprotein 1	Down	SKAP1_Down
205500_at	0.00238	0.000437	-3.5768	-0.57483	-1.02625	C5	complement component 5	Down	C5_Down
217967_s_at	0.00246	0.000454	3.56616	-0.61017	1.09048	FAM129A	family with sequence similarity 129 member A	Up	FAM129A_Up
202381_at	0.00247	0.000457	3.56464	-0.6152	1.10302	ADAM9	ADAM metallopeptidase domain 9	Up	ADAM9_Up
231265_at	0.00249	0.000462	3.56141	-0.62592	2.13191	COX7B2	cytochrome c oxidase subunit 7B2	Up	COX7B2_Up
1556919_at	0.00251	0.000465	-3.55939	-0.6326	-1.04722	LEPR	leptin receptor	Down	LEPR_Down
243110_x_at	0.00251	0.000466	-3.55867	-0.63499	-1.5364	NPW	neuropeptide W	Down	NPW_Down
219873_at	0.00252	0.000468	-3.55795	-0.63736	-1.28559	COLEC11	collectin subfamily member 11	Down	COLEC11_Down
218804_at	0.0026	0.000488	-3.54602	-0.67681	-1.78473	ANO1	anoctamin 1	Down	ANO1_Down
201562_s_at	0.00263	0.000493	-3.54332	-0.6857	-1.11407	SORD	sorbitol dehydrogenase	Down	SORD_Down
214469_at	0.00264	0.000496	3.5413	-0.69234	1.09702	HIST1H2AE	histone cluster 1, H2ae	Up	HIST1H2AE_Up
234361_at	0.00267	0.000502	-3.53778	-0.70397	-1.09678	CREB3L3	cAMP responsive element binding protein 3 like 3	Down	CREB3L3_Down
203645_s_at	0.00268	0.000504	-3.53667	-0.70759	-1.15327	CD163	CD163 molecule	Down	CD163_Down
210497_x_at	0.00271	0.000512	3.53241	-0.72163	1.31531	SSX2B///SSX2	SSX family member 2B///SSX family member 2	Up	SSX2B///SSX2_Up
243015_at	0.00274	0.00052	-3.52792	-0.73639	-1.43635	CYP3A5	cytochrome P450 family 3 subfamily A member 5	Down	CYP3A5_Down
230964_at	0.00274	0.00052	-3.52792	-0.7364	-1.10683	FREM2	FRAS1 related extracellular matrix protein 2	Down	FREM2_Down
226863_at	0.00282	0.000539	-3.51813	-0.7685	-1.71532	FAM110C	family with sequence similarity 110 member C	Down	FAM110C_Down
214247_s_at	0.00285	0.000544	3.51566	-0.77658	1.23569	DKK3	dickkopf WNT signaling pathway inhibitor 3	Up	DKK3_Up
232165_at	0.00287	0.000549	3.51291	-0.78559	1.65575	EPPK1	epiplakin 1	Up	EPPK1_Up
226925_at	0.00287	0.000549	3.51275	-0.78612	1.00796	PXYLP1	2-phosphoxylose phosphatase 1	Up	PXYLP1_Up
205943_at	0.00293	0.000564	-3.5053	-0.81046	-1.87357	TDO2	tryptophan 2,3-dioxygenase	Down	TDO2_Down
213245_at	0.00294	0.000566	-3.50443	-0.8133	-1.16272	ADCY1	adenylate cyclase 1	Down	ADCY1_Down
209821_at	0.00295	0.000569	-3.50257	-0.81939	-1.13859	IL33	interleukin 33	Down	IL33_Down
213429_at	0.00304	0.00059	3.49228	-0.85292	1.78161	BICC1	BicC family RNA binding protein 1	Up	BICC1_Up
202766_s_at	0.00305	0.000592	3.49137	-0.85589	1.12921	FBN1	fibrillin 1	Up	FBN1_Up
224043_s_at	0.00308	0.0006	-3.48758	-0.86822	-1.33031	UPB1	beta-ureidopropionase 1	Down	UPB1_Down
242662_at	0.00309	0.000604	-3.48599	-0.87341	-1.21559	PCSK6	proprotein convertase subtilisin/kexin type 6	Down	PCSK6_Down
210326_at	0.00312	0.00061	-3.48279	-0.88379	-1.47062	AGXT	alanine-glyoxylate aminotransferase	Down	AGXT_Down
206626_x_at	0.00316	0.000619	3.47896	-0.89624	2.14155	SSX1	SSX family member 1	Up	SSX1_Up
223423_at	0.00318	0.000624	3.47661	-0.90387	1.19107	GPR160	G protein-coupled receptor 160	Up	GPR160_Up
205076_s_at	0.0032	0.00063	3.47403	-0.91221	1.12006	MTMR11	myotubularin related protein 11	Up	MTMR11_Up
232707_at	0.00334	0.000663	3.45947	-0.95933	1.39085	ISX	intestine specific homeobox	Up	ISX_Up
223235_s_at	0.00334	0.000664	3.45889	-0.96118	1.11155	SMOC2	SPARC related modular calcium binding 2	Up	SMOC2_Up
209978_s_at	0.00336	0.000668	-3.45727	-0.96642	-1.59474	PLG///LPA	plasminogen///lipoprotein(a)	Down	PLG///LPA_Down
227388_at	0.0034	0.000678	-3.453	-0.9802	-1.15543	TUSC1	tumor suppressor candidate 1	Down	TUSC1_Down
204567_s_at	0.00349	0.000698	3.44447	-1.00765	1.13575	ABCG1	ATP binding cassette subfamily G member 1	Up	ABCG1_Up
226226_at	0.00365	0.000737	3.42901	-1.05728	1.26198	TMEM45B	transmembrane protein 45B	Up	TMEM45B_Up
206101_at	0.00371	0.000753	-3.42264	-1.07765	-1.22172	ECM2	extracellular matrix protein 2	Down	ECM2_Down
208170_s_at	0.00376	0.000765	3.41813	-1.09206	1.06394	TRIM31	tripartite motif containing 31	Up	TRIM31_Up
1570505_at	0.00376	0.000766	-3.41797	-1.09259	-1.46814	ABCB4	ATP binding cassette subfamily B member 4	Down	ABCB4_Down
220106_at	0.00379	0.000772	-3.41546	-1.10062	-1.61521	NPC1L1	NPC1 like intracellular cholesterol transporter 1	Down	NPC1L1_Down
201540_at	0.0038	0.000776	-3.41399	-1.10528	-1.00493	FHL1	four and a half LIM domains 1	Down	FHL1_Down
217973_at	0.00385	0.000788	-3.4095	-1.1196	-1.13855	DCXR	dicarbonyl and L-xylulose reductase	Down	DCXR_Down
212531_at	0.00385	0.000789	3.40926	-1.12038	1.85384	LCN2	lipocalin 2	Up	LCN2_Up
210394_x_at	0.0039	0.000799	3.40553	-1.13227	1.79183	SSX4B///SSX4	SSX family member 4B///SSX family member 4	Up	SSX4B///SSX4_Up
209660_at	0.00396	0.000816	-3.3994	-1.15176	-1.22572	TTR	transthyretin	Down	TTR_Down
209343_at	0.00399	0.000824	-3.39685	-1.15987	-1.19541	EFHD1	EF-hand domain family member D1	Down	EFHD1_Down
203065_s_at	0.004	0.000827	3.39581	-1.16317	1.09617	CAV1	caveolin 1	Up	CAV1_Up
229116_at	0.00401	0.000828	3.39546	-1.16429	1.0457	CNKSR2	connector enhancer of kinase suppressor of Ras 2	Up	CNKSR2_Up
205862_at	0.00403	0.000835	3.39292	-1.17235	1.36382	GREB1	growth regulation by estrogen in breast cancer 1	Up	GREB1_Up
203695_s_at	0.0042	0.000876	3.37897	-1.21654	1.11341	DFNA5	DFNA5, deafness associated tumor suppressor	Up	DFNA5_Up
219772_s_at	0.00421	0.000879	3.37779	-1.22027	1.05079	SMPX	small muscle protein, X-linked	Up	SMPX_Up
214751_at	0.00426	0.000891	3.37393	-1.23247	1.31306	ZNF468	zinc finger protein 468	Up	ZNF468_Up
209921_at	0.00427	0.000894	3.37294	-1.23559	1.49999	SLC7A11	solute carrier family 7 member 11	Up	SLC7A11_Up
227180_at	0.00428	0.000897	3.37216	-1.23806	1.88847	ELOVL7	ELOVL fatty acid elongase 7	Up	ELOVL7_Up
224724_at	0.0043	0.000903	-3.37022	-1.24417	-1.21207	SULF2	sulfatase 2	Down	SULF2_Down
206872_at	0.00433	0.000909	-3.36805	-1.25101	-1.02039	SLC17A1	solute carrier family 17 member 1	Down	SLC17A1_Down
203915_at	0.00444	0.000939	3.35855	-1.28091	1.51564	CXCL9	C-X-C motif chemokine ligand 9	Up	CXCL9_Up
202949_s_at	0.00448	0.00095	-3.35534	-1.29104	-1.14582	FHL2	four and a half LIM domains 2	Down	FHL2_Down
204823_at	0.00474	0.00102	3.33572	-1.3525	1.49283	NAV3	neuron navigator 3	Up	NAV3_Up
218051_s_at	0.00475	0.00102	3.33471	-1.35567	1.17547	NT5DC2	5'-nucleotidase domain containing 2	Up	NT5DC2_Up
208607_s_at	0.00484	0.00104	-3.32845	-1.37522	-2.20348	SAA2-SAA4///SAA2///SAA1	SAA2-SAA4 readthrough///serum amyloid A2///serum amyloid A1	Down	SAA2-SAA4///SAA2///SAA1_Down
204844_at	0.00484	0.00104	-3.32821	-1.37596	-1.15376	ENPEP	glutamyl aminopeptidase	Down	ENPEP_Down
206515_at	0.00494	0.00107	-3.32031	-1.40059	-1.12988	CYP4F3	cytochrome P450 family 4 subfamily F member 3	Down	CYP4F3_Down
209374_s_at	0.00495	0.00107	-3.3199	-1.40185	-1.41003	IGHM	immunoglobulin heavy constant mu	Down	IGHM_Down
224917_at	0.00499	0.00108	-3.3169	-1.4112	-1.1207	MIR21///VMP1	microRNA 21///vacuole membrane protein 1	Down	MIR21///VMP1_Down
218963_s_at	0.00499	0.00108	3.31684	-1.41137	2.11049	KRT23	keratin 23	Up	KRT23_Up
211843_x_at	0.0052	0.00114	-3.30151	-1.45897	-1.51239	CYP3A7-CYP3A51P	CYP3A7-CYP3A51P readthrough	Down	CYP3A7-CYP3A51P_Down
217478_s_at	0.00523	0.00115	3.29943	-1.46539	1.25551	HLA-DMA	major histocompatibility complex, class II, DM alpha	Up	HLA-DMA_Up
203408_s_at	0.00539	0.00119	-3.28815	-1.50025	-1.02138	SATB1	SATB homeobox 1	Down	SATB1_Down
243483_at	0.0054	0.0012	-3.28721	-1.50316	-1.80738	TRPM8	transient receptor potential cation channel subfamily M member 8	Down	TRPM8_Down
216223_at	0.00545	0.00121	-3.28404	-1.51293	-1.05704	CPN2	carboxypeptidase N subunit 2	Down	CPN2_Down
219274_at	0.00546	0.00121	-3.28371	-1.51396	-1.03405	TSPAN12	tetraspanin 12	Down	TSPAN12_Down
217771_at	0.00556	0.00124	3.27743	-1.5333	1.45804	GOLM1	golgi membrane protein 1	Up	GOLM1_Up
204920_at	0.00562	0.00125	-3.27323	-1.54622	-1.93559	CPS1	carbamoyl-phosphate synthase 1	Down	CPS1_Down
219010_at	0.00586	0.00132	3.25781	-1.5935	1.34037	C1orf106	chromosome 1 open reading frame 106	Up	C1orf106_Up
207409_at	0.00589	0.00133	-3.25617	-1.59853	-2.10638	LECT2	leukocyte cell derived chemotaxin 2	Down	LECT2_Down
229614_at	0.00598	0.00135	3.25072	-1.61518	1.20182	ZNF320	zinc finger protein 320	Up	ZNF320_Up
206134_at	0.00606	0.00138	3.24548	-1.63116	1.12835	ADAMDEC1	ADAM like decysin 1	Up	ADAMDEC1_Up
215432_at	0.00627	0.00143	3.23324	-1.66846	1.37145	ACSM1	acyl-CoA synthetase medium-chain family member 1	Up	ACSM1_Up
225911_at	0.00629	0.00144	3.23207	-1.67199	1.16928	NPNT	nephronectin	Up	NPNT_Up
218796_at	0.00672	0.00156	3.20726	-1.74712	1.11343	FERMT1	fermitin family member 1	Up	FERMT1_Up
210521_s_at	0.00683	0.00159	-3.20107	-1.76578	-1.90708	FETUB	fetuin B	Down	FETUB_Down
221662_s_at	0.00691	0.00162	-3.19676	-1.77876	-1.20365	SLC22A7	solute carrier family 22 member 7	Down	SLC22A7_Down
239481_at	0.0071	0.00167	3.18712	-1.80773	1.49922	FAM133A	family with sequence similarity 133 member A	Up	FAM133A_Up
207820_at	0.00716	0.00169	-3.18403	-1.81701	-1.73058	ADH1A	alcohol dehydrogenase 1A (class I), alpha polypeptide	Down	ADH1A_Down
227952_at	0.00721	0.0017	3.18153	-1.8245	1.56781	ZNF595	zinc finger protein 595	Up	ZNF595_Up
1559213_at	0.00727	0.00172	3.17782	-1.83561	2.21176	LINC01419	long intergenic non-protein coding RNA 1419	Up	LINC01419_Up
235521_at	0.00733	0.00174	3.17527	-1.84323	1.11475	HOXA3	homeobox A3	Up	HOXA3_Up
206262_at	0.00733	0.00174	-3.17485	-1.84448	-1.80365	ADH1C	alcohol dehydrogenase 1C (class I), gamma polypeptide	Down	ADH1C_Down
200795_at	0.00733	0.00174	3.17473	-1.84484	1.34409	SPARCL1	SPARC like 1	Up	SPARCL1_Up
225782_at	0.00776	0.00186	3.15382	-1.90719	1.1895	MSRB3	methionine sulfoxide reductase B3	Up	MSRB3_Up
210839_s_at	0.00778	0.00187	3.15263	-1.91073	1.36085	ENPP2	ectonucleotide pyrophosphatase/phosphodiesterase 2	Up	ENPP2_Up
205799_s_at	0.00787	0.0019	-3.1482	-1.92387	-2.0216	SLC3A1	solute carrier family 3 member 1	Down	SLC3A1_Down
1569003_at	0.00804	0.00194	-3.14055	-1.94656	-1.01538	VMP1	vacuole membrane protein 1	Down	VMP1_Down
229819_at	0.00805	0.00195	-3.14013	-1.9478	-1.27815	A1BG	alpha-1-B glycoprotein	Down	A1BG_Down
203987_at	0.00805	0.00195	3.13997	-1.94829	1.24263	FZD6	frizzled class receptor 6	Up	FZD6_Up
31835_at	0.00812	0.00197	-3.13632	-1.95907	-1.51402	HRG	histidine rich glycoprotein	Down	HRG_Down
206065_s_at	0.00819	0.00199	-3.1333	-1.96799	-1.34755	DPYS	dihydropyrimidinase	Down	DPYS_Down
222387_s_at	0.00821	0.002	3.13218	-1.9713	1.04396	VPS35	VPS35 retromer complex component	Up	VPS35_Up
226237_at	0.00827	0.00201	3.12964	-1.97882	1.1229	COL8A1	collagen type VIII alpha 1 chain	Up	COL8A1_Up
219631_at	0.00827	0.00202	3.12952	-1.97916	1.04657	LRP12	LDL receptor related protein 12	Up	LRP12_Up
223582_at	0.00828	0.00202	-3.12897	-1.98079	-1.02647	ADGRV1	adhesion G protein-coupled receptor V1	Down	ADGRV1_Down
210614_at	0.00853	0.00209	-3.11759	-2.01432	-1.11248	TTPA	alpha tocopherol transfer protein	Down	TTPA_Down
242871_at	0.00874	0.00216	3.10792	-2.04272	1.32253	PAQR5	progestin and adipoQ receptor family member 5	Up	PAQR5_Up
228771_at	0.00894	0.00222	3.09909	-2.06859	1.05771	GRK3	G protein-coupled receptor kinase 3	Up	GRK3_Up
206024_at	0.009	0.00224	-3.09648	-2.07623	-2.16247	HPD	4-hydroxyphenylpyruvate dioxygenase	Down	HPD_Down
214719_at	0.00908	0.00227	-3.09304	-2.08627	-1.28474	SLC46A3	solute carrier family 46 member 3	Down	SLC46A3_Down
226051_at	0.0092	0.0023	3.08816	-2.10051	1.4105	SELM	selenoprotein M	Up	SELM_Up
205404_at	0.00928	0.00233	-3.08501	-2.10971	-2.12365	HSD11B1	hydroxysteroid 11-beta dehydrogenase 1	Down	HSD11B1_Down
201116_s_at	0.00943	0.00238	3.07841	-2.12892	1.07332	CPE	carboxypeptidase E	Up	CPE_Up
212094_at	0.00945	0.00238	3.07771	-2.13095	2.45052	PEG10	paternally expressed 10	Up	PEG10_Up
205302_at	0.00946	0.00239	-3.07717	-2.13252	-1.40264	IGFBP1	insulin like growth factor binding protein 1	Down	IGFBP1_Down
212592_at	0.00964	0.00244	-3.07004	-2.15322	-1.6417	JCHAIN	joining chain of multimeric IgA and IgM	Down	JCHAIN_Down
222939_s_at	0.00972	0.00247	-3.06682	-2.16256	-1.00728	SLC16A10	solute carrier family 16 member 10	Down	SLC16A10_Down
1555229_a_at	0.00973	0.00247	-3.06643	-2.16369	-1.45524	C1S	complement component 1, s subcomponent	Down	C1S_Down
202431_s_at	0.0101	0.00259	-3.0514	-2.20715	-1.15473	MYC	v-myc avian myelocytomatosis viral oncogene homolog	Down	MYC_Down
226435_at	0.0102	0.00261	3.04889	-2.21438	1.13047	PAPLN	papilin, proteoglycan like sulfated glycoprotein	Up	PAPLN_Up
213150_at	0.0102	0.00263	3.04634	-2.22173	1.27317	HOXA10	homeobox A10	Up	HOXA10_Up
223484_at	0.0104	0.00268	3.04083	-2.23759	1.49651	C15orf48	chromosome 15 open reading frame 48	Up	C15orf48_Up
205700_at	0.0106	0.00276	-3.03107	-2.26561	-1.39132	HSD17B6	hydroxysteroid 17-beta dehydrogenase 6	Down	HSD17B6_Down
223579_s_at	0.0108	0.00281	-3.02537	-2.28194	-1.26006	APOB	apolipoprotein B	Down	APOB_Down
214456_x_at	0.0113	0.00296	-3.00924	-2.32799	-1.54224	SAA2///SAA1	serum amyloid A2///serum amyloid A1	Down	SAA2///SAA1_Down
231310_at	0.0113	0.00296	3.00869	-2.32956	1.50818	TRIM71	tripartite motif containing 71	Up	TRIM71_Up
204755_x_at	0.0113	0.00298	-3.0072	-2.3338	-1.2227	HLF	HLF, PAR bZIP transcription factor	Down	HLF_Down
228497_at	0.0115	0.00303	3.00162	-2.34967	1.01927	SLC22A15	solute carrier family 22 member 15	Up	SLC22A15_Up
214971_s_at	0.0119	0.00319	-2.98576	-2.39464	-1.04008	ST6GAL1	ST6 beta-galactoside alpha-2,6-sialyltransferase 1	Down	ST6GAL1_Down
203083_at	0.0121	0.00323	2.98146	-2.40679	1.36547	THBS2	thrombospondin 2	Up	THBS2_Up
231154_x_at	0.0122	0.00326	2.9781	-2.41629	1.38803	TINAG	tubulointerstitial nephritis antigen	Up	TINAG_Up
213905_x_at	0.0126	0.00341	-2.96377	-2.45663	-1.05491	BGN	biglycan	Down	BGN_Down
209596_at	0.0127	0.00344	-2.96133	-2.46348	-1.05766	MXRA5	matrix remodeling associated 5	Down	MXRA5_Down
200648_s_at	0.0135	0.00369	2.93819	-2.52819	1.172	GLUL	glutamate-ammonia ligase	Up	GLUL_Up
204619_s_at	0.0136	0.00373	2.93508	-2.53685	1.21332	VCAN	versican	Up	VCAN_Up
217504_at	0.0138	0.0038	-2.92862	-2.55484	-1.16889	ABCA6	ATP binding cassette subfamily A member 6	Down	ABCA6_Down
209242_at	0.0141	0.0039	-2.92042	-2.57759	-1.7151	PEG3	paternally expressed 3	Down	PEG3_Down
224694_at	0.0142	0.00394	2.9171	-2.58678	1.07255	ANTXR1	anthrax toxin receptor 1	Up	ANTXR1_Up
241716_at	0.0143	0.00398	-2.91415	-2.59494	-1.17971	HSPD1	heat shock protein family D (Hsp60) member 1	Down	HSPD1_Down
238160_at	0.0143	0.00398	-2.9141	-2.59509	-1.24916	ACOT12	acyl-CoA thioesterase 12	Down	ACOT12_Down
205675_at	0.0143	0.00399	-2.91297	-2.59823	-1.17642	MTTP	microsomal triglyceride transfer protein	Down	MTTP_Down
203824_at	0.0151	0.00426	2.89183	-2.65648	1.43172	TSPAN8	tetraspanin 8	Up	TSPAN8_Up
235591_at	0.0151	0.00427	-2.8911	-2.65847	-1.20517	SSTR1	somatostatin receptor 1	Down	SSTR1_Down
204105_s_at	0.0151	0.00427	2.89081	-2.65928	1.4908	NRCAM	neuronal cell adhesion molecule	Up	NRCAM_Up
229477_at	0.0154	0.00437	-2.88294	-2.68085	-1.88889	THRSP	thyroid hormone responsive	Down	THRSP_Down
224367_at	0.0155	0.00442	2.87933	-2.69073	1.60896	BEX2	brain expressed X-linked 2	Up	BEX2_Up
215321_at	0.0156	0.00444	-2.87811	-2.69409	-1.05061	RUNDC3B	RUN domain containing 3B	Down	RUNDC3B_Down
206286_s_at	0.0157	0.00447	2.87615	-2.69943	1.50545	TDGF1P3///TDGF1	teratocarcinoma-derived growth factor 1 pseudogene 3///teratocarcinoma-derived growth factor 1	Up	TDGF1P3///TDGF1_Up
209942_x_at	0.0157	0.00448	2.87501	-2.70254	2.16694	MAGEA6///MAGEA3	MAGE family member A6///MAGE family member A3	Up	MAGEA6///MAGEA3_Up
206738_at	0.0158	0.00451	-2.87273	-2.70877	-1.40336	APOC4-APOC2///APOC4///APOC2	APOC4-APOC2 readthrough (NMD candidate)///apolipoprotein C4///apolipoprotein C2	Down	APOC4-APOC2///APOC4///APOC2_Down
238654_at	0.016	0.00458	2.86816	-2.72125	1.02928	VSIG10L	V-set and immunoglobulin domain containing 10 like	Up	VSIG10L_Up
219803_at	0.0161	0.0046	-2.86611	-2.72682	-1.07204	ANGPTL3	angiopoietin like 3	Down	ANGPTL3_Down
214612_x_at	0.0163	0.0047	2.85947	-2.74489	2.16719	MAGEA6	MAGE family member A6	Up	MAGEA6_Up
205422_s_at	0.0165	0.00475	2.85564	-2.75531	1.16989	ITGBL1	integrin subunit beta like 1	Up	ITGBL1_Up
213524_s_at	0.0175	0.00513	-2.83031	-2.82379	-1.07483	G0S2	G0/G1 switch 2	Down	G0S2_Down
204602_at	0.0182	0.00538	2.81461	-2.86597	1.89589	DKK1	dickkopf WNT signaling pathway inhibitor 1	Up	DKK1_Up
221530_s_at	0.0187	0.00552	2.8055	-2.89035	1.01804	BHLHE41	basic helix-loop-helix family member e41	Up	BHLHE41_Up
225645_at	0.0188	0.00556	2.8033	-2.89621	1.48398	EHF	ETS homologous factor	Up	EHF_Up
226702_at	0.0188	0.00557	2.80245	-2.89848	1.05267	CMPK2	cytidine/uridine monophosphate kinase 2	Up	CMPK2_Up
206010_at	0.0188	0.00559	-2.80157	-2.90084	-1.12255	HABP2	hyaluronan binding protein 2	Down	HABP2_Down
204430_s_at	0.0198	0.00593	2.78144	-2.95434	1.05284	SLC2A5	solute carrier family 2 member 5	Up	SLC2A5_Up
211161_s_at	0.02	0.00603	2.7761	-2.9685	1.2508	COL3A1	collagen type III alpha 1 chain	Up	COL3A1_Up
205421_at	0.0212	0.00646	-2.75285	-3.02974	-1.01521	SLC22A3	solute carrier family 22 member 3	Down	SLC22A3_Down
213920_at	0.0227	0.007	-2.72504	-3.1024	-1.18036	CUX2	cut like homeobox 2	Down	CUX2_Down
227194_at	0.0228	0.00705	2.7227	-3.10849	1.66729	FAM3B	family with sequence similarity 3 member B	Up	FAM3B_Up
212354_at	0.0233	0.00724	2.71379	-3.13161	1.04049	SULF1	sulfatase 1	Up	SULF1_Up
206177_s_at	0.024	0.00751	-2.70105	-3.16453	-1.23226	ARG1	arginase 1	Down	ARG1_Down
224209_s_at	0.0246	0.00773	-2.69093	-3.1906	-1.16917	GDA	guanine deaminase	Down	GDA_Down
230316_at	0.0249	0.00787	-2.6847	-3.20658	-1.08565	SEC14L2	SEC14 like lipid binding 2	Down	SEC14L2_Down
219230_at	0.025	0.00788	-2.68424	-3.20777	-1.01815	TMEM100	transmembrane protein 100	Down	TMEM100_Down
218687_s_at	0.025	0.00791	2.68322	-3.21037	1.10314	MUC13	mucin 13, cell surface associated	Up	MUC13_Up
214069_at	0.0257	0.00816	-2.6721	-3.23882	-1.10195	ACSM2B///ACSM2A	acyl-CoA synthetase medium-chain family member 2B///acyl-CoA synthetase medium-chain family member 2A	Down	ACSM2B///ACSM2A_Down
216910_at	0.0267	0.00856	-2.65543	-3.28125	-1.16328	XPNPEP2	X-prolyl aminopeptidase 2	Down	XPNPEP2_Down
40665_at	0.0268	0.00862	-2.65335	-3.28655	-1.27842	FMO3	flavin containing monooxygenase 3	Down	FMO3_Down
212190_at	0.0271	0.00871	2.64965	-3.29591	1.22816	SERPINE2	serpin family E member 2	Up	SERPINE2_Up
222853_at	0.0271	0.00872	-2.64918	-3.29711	-1.03644	FLRT3	fibronectin leucine rich transmembrane protein 3	Down	FLRT3_Down
225242_s_at	0.0274	0.00886	2.64344	-3.31164	1.21295	CCDC80	coiled-coil domain containing 80	Up	CCDC80_Up
223605_at	0.0279	0.00905	-2.63609	-3.3302	-1.12982	SLC25A18	solute carrier family 25 member 18	Down	SLC25A18_Down
205623_at	0.0289	0.00946	2.62048	-3.36944	1.40215	ALDH3A1	aldehyde dehydrogenase 3 family member A1	Up	ALDH3A1_Up
210538_s_at	0.0297	0.00977	2.60927	-3.39748	1.02323	BIRC3	baculoviral IAP repeat containing 3	Up	BIRC3_Up
207007_at	0.0298	0.00984	-2.60662	-3.40411	-1.22966	NR1I3	nuclear receptor subfamily 1 group I member 3	Down	NR1I3_Down
210467_x_at	0.0304	0.0101	2.59818	-3.42512	1.42455	MAGEA12	MAGE family member A12	Up	MAGEA12_Up
202508_s_at	0.0313	0.0104	2.58565	-3.45622	1.02423	SNAP25	synaptosome associated protein 25	Up	SNAP25_Up
205564_at	0.0317	0.0106	2.57972	-3.47089	1.66161	PAGE4	PAGE family member 4	Up	PAGE4_Up
221872_at	0.0318	0.0107	2.57767	-3.47597	1.09986	RARRES1	retinoic acid receptor responder 1	Up	RARRES1_Up
204351_at	0.032	0.0108	2.57499	-3.48258	1.8879	S100P	S100 calcium binding protein P	Up	S100P_Up
230554_at	0.0321	0.0108	-2.57453	-3.4837	-1.19601	ACSM2A	acyl-CoA synthetase medium-chain family member 2A	Down	ACSM2A_Down
232654_s_at	0.0322	0.0108	2.57236	-3.48906	1.21223	UGT1A6	UDP glucuronosyltransferase family 1 member A6	Up	UGT1A6_Up
222071_s_at	0.0329	0.0111	-2.56372	-3.51032	-1.03715	SLCO4C1	solute carrier organic anion transporter family member 4C1	Down	SLCO4C1_Down
214453_s_at	0.0334	0.0113	2.55646	-3.52814	1.007	IFI44	interferon induced protein 44	Up	IFI44_Up
205666_at	0.0341	0.0116	2.54747	-3.55011	1.06296	FMO1	flavin containing monooxygenase 1	Up	FMO1_Up
217858_s_at	0.0341	0.0116	-2.54724	-3.55069	-1.11281	ARMCX3	armadillo repeat containing, X-linked 3	Down	ARMCX3_Down
204059_s_at	0.0341	0.0116	2.54641	-3.5527	1.28241	ME1	malic enzyme 1	Up	ME1_Up
205047_s_at	0.035	0.012	2.53582	-3.57851	1.29924	ASNS	asparagine synthetase (glutamine-hydrolyzing)	Up	ASNS_Up
201843_s_at	0.0355	0.0122	2.52908	-3.59488	1.2448	EFEMP1	EGF containing fibulin like extracellular matrix protein 1	Up	EFEMP1_Up
219087_at	0.0355	0.0122	-2.52866	-3.59589	-1.0799	ASPN	asporin	Down	ASPN_Down
220057_at	0.036	0.0124	2.5224	-3.61106	1.07845	XAGE1B///XAGE1E	X antigen family member 1B///X antigen family member 1E	Up	XAGE1B///XAGE1E_Up
211071_s_at	0.0364	0.0126	2.51721	-3.6236	1.04889	MLLT11	myeloid/lymphoid or mixed-lineage leukemia; translocated to, 11	Up	MLLT11_Up
217867_x_at	0.0367	0.0127	2.51451	-3.63013	1.04699	BACE2	beta-site APP-cleaving enzyme 2	Up	BACE2_Up
205815_at	0.0367	0.0127	2.51385	-3.63172	2.23664	REG3A	regenerating family member 3 alpha	Up	REG3A_Up
205923_at	0.0369	0.0128	-2.51085	-3.63896	-1.44	RELN	reelin	Down	RELN_Down
243562_at	0.0378	0.0132	-2.49968	-3.66581	-1.03514	KNG1	kininogen 1	Down	KNG1_Down
242496_at	0.0382	0.0134	-2.49501	-3.677	-1.09797	ART4	ADP-ribosyltransferase 4 (Dombrock blood group)	Down	ART4_Down
205208_at	0.0398	0.0141	-2.47614	-3.72202	-1.15526	ALDH1L1	aldehyde dehydrogenase 1 family member L1	Down	ALDH1L1_Down
206350_at	0.0401	0.0142	-2.47286	-3.72981	-1.01762	APCS	amyloid P component, serum	Down	APCS_Down
220133_at	0.0434	0.0157	2.43692	-3.81459	1.11788	ODAM	odontogenic, ameloblast asssociated	Up	ODAM_Up
224589_at	0.0436	0.0158	-2.43396	-3.82153	-1.216	XIST	X inactive specific transcript (non-protein coding)	Down	XIST_Down
204540_at	0.0468	0.0172	2.40167	-3.8966	1.19891	EEF1A2	eukaryotic translation elongation factor 1 alpha 2	Up	EEF1A2_Up
1553197_at	0.0473	0.0175	2.39574	-3.9103	1.19724	DCAF4L2	DDB1 and CUL4 associated factor 4 like 2	Up	DCAF4L2_Up
208962_s_at	0.0486	0.0181	2.38324	-3.93903	1.00766	MIR1908///FADS1	microRNA 1908///fatty acid desaturase 1	Up	MIR1908///FADS1_Up
227475_at	0.0491	0.0184	2.37792	-3.95122	1.25486	FOXQ1	forkhead box Q1	Up	FOXQ1_Up
204688_at	0.0496	0.0186	2.37347	-3.9614	1.11347	SGCE	sarcoglycan epsilon	Up	SGCE_Up
207200_at	0.0496	0.0186	-2.37296	-3.96258	-1.20296	OTC	ornithine carbamoyltransferase	Down	OTC_Down
218237_s_at	0.0499	0.0187	2.37025	-3.96874	1.07305	SLC38A1	solute carrier family 38 member 1	Up	SLC38A1_Up
