# Supplementary material for: Centromere protein N may be a novel malignant prognostic biomarker for hepatocellular carcinoma
Source: PeerJ. 2021 May 3;9:e11342. doi: 10.7717/peerj.11342 (PMC8101454; doi:10.7717/peerj.11342)
Supplement: File S3 [file peerj-09-11342-s013.xlsx]

## Sheet: Normal vs HCC_GSE87630
ID	adj.P.Val	P.Value	t	B	logFC	Gene.symbol	Gene.title
ILMN_1683607	6.4e-23	1.18e-25	-14.3981	47.8579	-5.01122	CYP1A2	cytochrome P450 family 1 subfamily A member 2
ILMN_1745103	2.52e-46	2e-50	-30.0465	103.119	-4.76593	CLEC1B	C-type lectin domain family 1 member B
ILMN_1729188	1.73e-17	8.43e-20	-11.5401	34.5654	-4.73981	HAMP	hepcidin antimicrobial peptide
ILMN_2349771	2.86e-27	2.57e-30	-16.8344	58.4142	-4.26052	FCN3	ficolin 3
ILMN_1772206	1.48e-15	1.17e-17	-10.5301	29.6941	-4.24396	CYP3A4	cytochrome P450 family 3 subfamily A member 4
ILMN_1718766	2.03e-23	3.6e-26	-14.6601	49.0301	-4.04948	MT1F	metallothionein 1F
ILMN_1657435	3.02e-25	3.67e-28	-15.6875	53.5412	-4.01285	MT1M	metallothionein 1M
ILMN_2193817	2.32e-46	1.23e-50	-30.2168	103.58	-3.95382	CLEC4G	C-type lectin domain family 4 member G
ILMN_1715401	1.74e-12	2.99e-14	-8.93755	21.9482	-3.83905	MT1G	metallothionein 1G
ILMN_1669523	4.75e-32	1.63e-35	-19.7756	70.1193	-3.74617	FOS	Fos proto-oncogene, AP-1 transcription factor subunit
ILMN_2136089	3.86e-24	5.92e-27	-15.0613	50.8077	-3.68805
ILMN_1683923	5.41e-22	1.2e-24	-13.8931	45.5753	-3.58339	MT1H	metallothionein 1H
ILMN_1731503	1e-31	3.97e-35	-19.5477	69.2523	-3.51282	MARCO	macrophage receptor with collagenous structure
ILMN_1701468	1.48e-15	1.18e-17	-10.5291	29.6893	-3.47832	HGFAC	HGF activator
ILMN_2347145	2.2e-17	1.09e-19	-11.4876	34.3138	-3.42543	DCN	decorin
ILMN_1775814	1.6e-25	1.77e-28	-15.8534	54.2569	-3.3867	GHR	growth hormone receptor
ILMN_1652199	1.56e-11	3.44e-13	-8.4399	19.5384	-3.36432
ILMN_2136010	1.77e-11	3.93e-13	-8.41296	19.4084	-3.35107	ADH4	alcohol dehydrogenase 4 (class II), pi polypeptide
ILMN_2049184	9.63e-25	1.3e-27	-15.4016	52.2998	-3.34268	DNASE1L3	deoxyribonuclease 1 like 3
ILMN_1670652	1.75e-14	1.81e-16	-9.97347	26.9892	-3.29625	CYP2C9	cytochrome P450 family 2 subfamily C member 9
ILMN_1810651	2.65e-17	1.33e-19	-11.446	34.1145	-3.21758	F9	coagulation factor IX
ILMN_1656713	2.9e-18	1.22e-20	-11.9399	36.4741	-3.21536	IGLL1	immunoglobulin lambda like polypeptide 1
ILMN_1746220	1.24e-40	1.64e-44	-25.5963	90.1649	-3.19621	DBH	dopamine beta-hydroxylase
ILMN_1739508	2.75e-11	6.4e-13	-8.31319	18.9275	-3.19481
ILMN_1751607	7.65e-23	1.52e-25	-14.3436	47.613	-3.16959	FOSB	FosB proto-oncogene, AP-1 transcription factor subunit
ILMN_2204576	3.24e-16	2.13e-18	-10.8777	31.3777	-3.15704	HSD17B13	hydroxysteroid 17-beta dehydrogenase 13
ILMN_1662640	9.16e-31	4.84e-34	-18.9152	66.8117	-3.15633
ILMN_1791678	8.16e-10	2.72e-11	-7.53986	15.2358	-3.1561	TAT	tyrosine aminotransferase
ILMN_1664350	3.68e-20	1.07e-22	-12.932	41.1476	-3.14225	GBA3	glucosylceramidase beta 3 (gene/pseudogene)
ILMN_1699214	1.31e-11	2.83e-13	-8.4801	19.7325	-3.14053
ILMN_2188966	4.38e-20	1.3e-22	-12.8912	40.9571	-3.12865	IGFALS	insulin like growth factor binding protein acid labile subunit
ILMN_1677497	3.75e-47	9.91e-52	-31.1073	105.949	-3.12712	STAB2	stabilin 2
ILMN_2223561	4.22e-37	6.7e-41	-23.1351	82.1596	-3.07353	CRHBP	corticotropin releasing hormone binding protein
ILMN_1687319	7.62e-25	9.87e-28	-15.4635	52.5693	-3.01825	SLCO1B3	solute carrier organic anion transporter family member 1B3
ILMN_1740717	2.4e-10	7.08e-12	-7.81908	16.5604	-2.97131	ADH1C	alcohol dehydrogenase 1C (class I), gamma polypeptide
ILMN_1803300	6.75e-18	3e-20	-11.7533	35.5849	-2.95845	SLC25A47	solute carrier family 25 member 47
ILMN_2131861	3.04e-25	3.78e-28	-15.6813	53.5145	-2.91456	SOCS2	suppressor of cytokine signaling 2
ILMN_1718968	3.47e-13	4.93e-15	-9.30321	23.7259	-2.89321	MT1E	metallothionein 1E
ILMN_1811598	4.53e-12	8.56e-14	-8.72369	20.9108	-2.87919	ADH1B	alcohol dehydrogenase 1B (class I), beta polypeptide
ILMN_1715742	1.37e-11	2.98e-13	-8.46959	19.6817	-2.85399	SLC22A1	solute carrier family 22 member 1
ILMN_1682636	1.21e-25	1.28e-28	-15.9282	54.5783	-2.82113	CXCL2	C-X-C motif chemokine ligand 2
ILMN_1784630	6.87e-35	1.45e-38	-21.6352	76.951	-2.77656	KBTBD11	kelch repeat and BTB domain containing 11
ILMN_1808114	7.64e-30	5.05e-33	-18.3331	64.5199	-2.77244	LYVE1	lymphatic vessel endothelial hyaluronan receptor 1
ILMN_1659072	3.15e-11	7.43e-13	-8.28264	18.7805	-2.75249	SPP2	secreted phosphoprotein 2
ILMN_1759513	8.88e-25	1.17e-27	-15.4244	52.3989	-2.7486	RND3	Rho family GTPase 3
ILMN_1720048	7.11e-23	1.34e-25	-14.3718	47.7398	-2.74399	CCL2	C-C motif chemokine ligand 2
ILMN_2067408	2.97e-24	4.41e-27	-15.1272	51.0979	-2.70025	CLRN3	clarin 3
ILMN_1781149	4.11e-32	1.3e-35	-19.8335	70.3384	-2.68153	INMT	indolethylamine N-methyltransferase
ILMN_1665437	4.45e-06	3.57e-07	-5.47299	5.95694	-2.67398	CYP2E1	cytochrome P450 family 2 subfamily E member 1
ILMN_1803825	3.71e-25	4.7e-28	-15.6313	53.2982	-2.65993	CXCL12	C-X-C motif chemokine ligand 12
ILMN_2100437	1.72e-17	8.35e-20	-11.542	34.5747	-2.65501	HBB	hemoglobin subunit beta
ILMN_1708107	3.42e-20	9.86e-23	-12.9495	41.2291	-2.65428	DPT	dermatopontin
ILMN_2176592	2.79e-21	6.88e-24	-13.5171	43.8554	-2.63397	BCHE	butyrylcholinesterase
ILMN_2322131	1.02e-34	2.43e-38	-21.4959	76.4538	-2.63339	CLEC4M	C-type lectin domain family 4 member M
ILMN_1699421	1.77e-14	1.83e-16	-9.97102	26.9773	-2.62981	ANXA10	annexin A10
ILMN_1775170	3.87e-11	9.35e-13	-8.23557	18.554	-2.61886	MT1X	metallothionein 1X
ILMN_1687848	6.03e-31	2.87e-34	-19.0464	67.3224	-2.61115	C7	complement component 7
ILMN_2211546	6.69e-19	2.46e-21	-12.2731	38.0541	-2.60548	HAO1	hydroxyacid oxidase 1
ILMN_1709486	6.36e-30	4.04e-33	-18.3881	64.7384	-2.60467	SRPX	sushi repeat containing protein, X-linked
ILMN_1746085	1.68e-19	5.32e-22	-12.5938	39.5654	-2.56098	IGFBP3	insulin like growth factor binding protein 3
ILMN_1695404	2.5e-14	2.69e-16	-9.89296	26.5973	-2.55901	LY6E	lymphocyte antigen 6 complex, locus E
ILMN_1715508	6.02e-16	4.29e-18	-10.7345	30.685	-2.54908	NNMT	nicotinamide N-methyltransferase
ILMN_1745607	1.55e-17	7.41e-20	-11.5667	34.6928	-2.52398	A2M	alpha-2-macroglobulin
ILMN_1714057	1.32e-32	3.49e-36	-20.1753	71.6237	-2.51957	FCN2	ficolin 2
ILMN_1809311	2.97e-11	6.98e-13	-8.29549	18.8423	-2.51435	APOF	apolipoprotein F
ILMN_1696590	5.03e-16	3.54e-18	-10.7737	30.8744	-2.51231	CHST4	carbohydrate sulfotransferase 4
ILMN_1684982	3.91e-12	7.28e-14	-8.75664	21.0705	-2.50461	PDK4	pyruvate dehydrogenase kinase 4
ILMN_1811114	1.57e-05	1.46e-06	-5.14035	4.59183	-2.47269	SDS	serine dehydratase
ILMN_1670903	3.19e-29	2.28e-32	-17.9645	63.0458	-2.46967	NAT2	N-acetyltransferase 2
ILMN_1731948	3.42e-08	1.65e-09	-6.67256	11.2078	-2.46539	PCK1	phosphoenolpyruvate carboxykinase 1
ILMN_1777797	1.54e-11	3.38e-13	-8.44364	19.5564	-2.46128	AFM	afamin
ILMN_1656369	1.48e-17	6.97e-20	-11.5791	34.7524	-2.46035	C8orf4	chromosome 8 open reading frame 4
ILMN_1792748	2.2e-07	1.3e-08	-6.22173	9.18208	-2.44753	CPS1	carbamoyl-phosphate synthase 1
ILMN_1742444	7.55e-10	2.51e-11	-7.55692	15.3164	-2.44141	UGT2B10	UDP glucuronosyltransferase family 2 member B10
ILMN_2093343	5.04e-29	3.73e-32	-17.8447	62.563	-2.43715	PLAC8	placenta specific 8
ILMN_2199389	3.9e-26	3.92e-29	-16.1997	55.739	-2.41995	VIPR1	vasoactive intestinal peptide receptor 1
ILMN_1709747	8.45e-16	6.32e-18	-10.6552	30.301	-2.41177	EXOG	endo/exonuclease (5'-3'), endonuclease G-like
ILMN_1660199	3.54e-16	2.39e-18	-10.8542	31.264	-2.40835	ACAA2	acetyl-CoA acyltransferase 2
ILMN_1677439	7.32e-15	6.67e-17	-10.1761	27.9748	-2.40386	GLS2	glutaminase 2
ILMN_1797731	6.33e-20	1.89e-22	-12.8115	40.585	-2.38384	MS4A6A	membrane spanning 4-domains A6A
ILMN_1739050	1.5e-14	1.52e-16	-10.0093	27.1635	-2.38173	PIPOX	pipecolic acid and sarcosine oxidase
ILMN_1730917	6.29e-24	9.81e-27	-14.9486	50.3105	-2.37887	KMO	kynurenine 3-monooxygenase (kynurenine 3-hydroxylase)
ILMN_1725311	1.1e-05	9.76e-07	-5.23602	4.97967	-2.36824	GCGR	glucagon receptor
ILMN_1729417	7.67e-16	5.68e-18	-10.677	30.4064	-2.36298	GNE	glucosamine (UDP-N-acetyl)-2-epimerase/N-acetylmannosamine kinase
ILMN_1767831	6.92e-21	1.87e-23	-13.3033	42.8704	-2.36015	C9	complement component 9
ILMN_1651498	3.32e-14	3.69e-16	-9.82907	26.2863	-2.35618	GADD45G	growth arrest and DNA damage inducible gamma
ILMN_1772894	5.43e-17	2.87e-19	-11.2876	33.3538	-2.3532	TMEM27	transmembrane protein 27
ILMN_1769155	1.39e-09	4.87e-11	-7.4184	14.6633	-2.34457	CYP2C8	cytochrome P450 family 2 subfamily C member 8
ILMN_1681882	8.08e-24	1.3e-26	-14.8854	50.0308	-2.3386	CETP	cholesteryl ester transfer protein
ILMN_1716859	2.91e-11	6.81e-13	-8.30036	18.8658	-2.33059	TDO2	tryptophan 2,3-dioxygenase
ILMN_1766914	1.92e-14	2.01e-16	-9.95242	26.8868	-2.32687	MFAP4	microfibrillar associated protein 4
ILMN_1804601	5.38e-10	1.71e-11	-7.63589	15.6901	-2.32338
ILMN_1774375	1.37e-13	1.8e-15	-9.50806	24.7231	-2.32307	SMIM24	small integral membrane protein 24
ILMN_1825945	3.25e-16	2.14e-18	-10.876	31.3695	-2.31642
ILMN_1651799	9.56e-19	3.69e-21	-12.1883	37.6532	-2.31368	SLC38A2	solute carrier family 38 member 2
ILMN_1721495	3.99e-15	3.51e-17	-10.3062	28.6075	-2.30178	ADAMTSL2	ADAMTS like 2
ILMN_1761511	1.8e-12	3.1e-14	-8.93055	21.9141	-2.30039	APOH	apolipoprotein H
ILMN_1707433	1.85e-10	5.28e-12	-7.87955	16.8486	-2.28067
ILMN_2167805	5.67e-16	4.02e-18	-10.7476	30.7481	-2.27988	LUM	lumican
ILMN_2197365	3.51e-13	5e-15	-9.30052	23.7128	-2.26432	RGS2	regulator of G-protein signaling 2
ILMN_1810000	2.78e-08	1.32e-09	-6.72054	11.4265	-2.24325	RDH16	retinol dehydrogenase 16 (all-trans)
ILMN_1684585	3.25e-21	8.33e-24	-13.476	43.6665	-2.23673	ACSL1	acyl-CoA synthetase long-chain family member 1
ILMN_2199439	7.41e-13	1.15e-14	-9.13117	22.889	-2.23426	CA2	carbonic anhydrase 2
ILMN_1725518	5.46e-28	4.47e-31	-17.2481	60.1296	-2.23293	ANGPTL6	angiopoietin like 6
ILMN_1815102	2.06e-17	1.01e-19	-11.502	34.3831	-2.23234	LCAT	lecithin-cholesterol acyltransferase
ILMN_2305116	1.86e-15	1.54e-17	-10.4738	29.4213	-2.22409	CTH	cystathionine gamma-lyase
ILMN_2379599	1.56e-16	9.45e-19	-11.0435	32.1783	-2.2225	CD163	CD163 molecule
ILMN_1788895	1.79e-23	3.13e-26	-14.6911	49.1682	-2.22187	SRD5A2	steroid 5 alpha-reductase 2
ILMN_1677038	1.16e-19	3.65e-22	-12.6731	39.9375	-2.21702	CPED1	cadherin like and PC-esterase domain containing 1
ILMN_1802205	5.93e-18	2.59e-20	-11.7838	35.7306	-2.21139	RHOB	ras homolog family member B
ILMN_1717557	7.02e-07	4.68e-08	-5.93708	7.93346	-2.20825	LECT2	leukocyte cell derived chemotaxin 2
ILMN_2365383	3.39e-10	1.03e-11	-7.74089	16.1883	-2.19767	ENO3	enolase 3
ILMN_1783963	3.44e-18	1.46e-20	-11.903	36.2986	-2.18645	AGXT2	alanine--glyoxylate aminotransferase 2
ILMN_1668510	7.42e-11	1.92e-12	-8.0877	17.844	-2.18545	GLYAT	glycine-N-acyltransferase
ILMN_1791095	1.38e-09	4.83e-11	-7.42003	14.671	-2.18222	SERPINA11	serpin family A member 11
ILMN_1795166	1.27e-25	1.38e-28	-15.9106	54.5027	-2.17994	PTH1R	parathyroid hormone 1 receptor
ILMN_2341343	8.8e-15	8.29e-17	-10.1319	27.7601	-2.16973	AGTR1	angiotensin II receptor type 1
ILMN_1776112	2.21e-06	1.65e-07	-5.65135	6.70726	-2.16447	SLC10A1	solute carrier family 10 member 1
ILMN_1855760	3.35e-14	3.73e-16	-9.8265	26.2738	-2.15795
ILMN_2127842	1.17e-15	9.01e-18	-10.5831	29.9513	-2.15677	HBA2	hemoglobin subunit alpha 2
ILMN_2079655	5.43e-21	1.44e-23	-13.3593	43.1291	-2.15144	KLRB1	killer cell lectin like receptor B1
ILMN_1811330	7e-24	1.11e-26	-14.921	50.1884	-2.14627	FAM134B	family with sequence similarity 134 member B
ILMN_1657838	2.16e-19	7.21e-22	-12.5301	39.2662	-2.14344	KDM8	lysine demethylase 8
ILMN_1746883	7.68e-12	1.54e-13	-8.60407	20.3317	-2.13871	SAT2	spermidine/spermine N1-acetyltransferase family member 2
ILMN_2068747	2.69e-09	1.01e-10	-7.26593	13.9481	-2.1387	OAT	ornithine aminotransferase
ILMN_1745688	1.14e-05	1.01e-06	-5.22673	4.94183	-2.13201	HPD	4-hydroxyphenylpyruvate dioxygenase
ILMN_1734929	3.52e-12	6.5e-14	-8.77972	21.1824	-2.13175	BBOX1	gamma-butyrobetaine hydroxylase 1
ILMN_1706579	1.54e-08	6.89e-10	-6.85934	12.0622	-2.12881	SHBG	sex hormone binding globulin
ILMN_2408683	1.84e-19	5.94e-22	-12.5706	39.4564	-2.12739
ILMN_2105441	3.13e-24	4.71e-27	-15.1121	51.0313	-2.11035	JCHAIN	joining chain of multimeric IgA and IgM
ILMN_1762899	1e-12	1.62e-14	-9.06161	22.5508	-2.10831	EGR1	early growth response 1
ILMN_1777190	2.62e-19	9.01e-22	-12.4834	39.0462	-2.10815	CFD	complement factor D
ILMN_1809623	7.94e-11	2.07e-12	-8.07236	17.7705	-2.1045
ILMN_2188264	8.22e-16	6.13e-18	-10.6615	30.3311	-2.10392	CYR61	cysteine rich angiogenic inducer 61
ILMN_1680274	1.34e-11	2.9e-13	-8.47477	19.7067	-2.10093
ILMN_1774742	5.75e-11	1.45e-12	-8.14599	18.1237	-2.10082	MTTP	microsomal triglyceride transfer protein
ILMN_1762464	7.4e-10	2.45e-11	-7.56196	15.3403	-2.09834	MBL2	mannose binding lectin 2
ILMN_1769129	4.67e-14	5.47e-16	-9.749	25.8964	-2.08747	CCL19	C-C motif chemokine ligand 19
ILMN_1808405	5.57e-12	1.07e-13	-8.67829	20.6909	-2.08638
ILMN_1763196	7.32e-10	2.41e-11	-7.5648	15.3537	-2.08353	WDR72	WD repeat domain 72
ILMN_1751811	1.02e-13	1.29e-15	-9.57478	25.048	-2.07597	PLGLB1	plasminogen-like B1
ILMN_2408764	3.33e-06	2.59e-07	-5.54758	6.26926	-2.07392	CYP2A7	cytochrome P450 family 2 subfamily A member 7
ILMN_1708778	3.24e-16	2.12e-18	-10.8778	31.3782	-2.07337	ASS1	argininosuccinate synthase 1
ILMN_2165993	1.21e-24	1.66e-27	-15.3458	52.0562	-2.07333	ITLN1	intelectin 1
ILMN_1760347	6.01e-12	1.17e-13	-8.65971	20.6009	-2.0608	SRGN	serglycin
ILMN_1789003	1.91e-13	2.58e-15	-9.4345	24.365	-2.05592	CPB2	carboxypeptidase B2
ILMN_1789096	1.08e-07	5.86e-09	-6.39721	9.96399	-2.04807	SLC51A	solute carrier family 51 alpha subunit
ILMN_1687978	3.49e-12	6.42e-14	-8.78226	21.1947	-2.04477	PHLDA1	pleckstrin homology like domain family A member 1
ILMN_1813766	1.78e-14	1.85e-16	-9.96852	26.9651	-2.04435	RCL1	RNA terminal phosphate cyclase like 1
ILMN_1794890	2.2e-24	3.2e-27	-15.1991	51.4137	-2.04207	SLC38A4	solute carrier family 38 member 4
ILMN_1686573	0.000113	1.31e-05	-4.59833	2.47445	-2.03638	DEFB1	defensin beta 1
ILMN_1785071	2.12e-10	6.18e-12	-7.84732	16.6949	-2.03048	SEPP1	selenoprotein P, plasma, 1
ILMN_1685483	5.44e-09	2.19e-10	-7.10231	13.1852	-2.02886	FETUB	fetuin B
ILMN_1794844	3.53e-05	3.58e-06	-4.92237	3.72345	-2.01874	THRSP	thyroid hormone responsive
ILMN_1717853	2.04e-16	1.25e-18	-10.9859	31.9001	-2.01231	DMGDH	dimethylglycine dehydrogenase
ILMN_2365176	1.93e-19	6.29e-22	-12.5587	39.4004	-2.00941	ALDH8A1	aldehyde dehydrogenase 8 family member A1
ILMN_1740402	2.25e-13	3.08e-15	-9.39858	24.1901	-2.00864	HAO2	hydroxyacid oxidase 2
ILMN_1691175	1.86e-10	5.32e-12	-7.87809	16.8416	-1.99628	ADH6	alcohol dehydrogenase 6 (class V)
ILMN_1795639	6.43e-14	7.74e-16	-9.67886	25.5549	-1.98885	MGMT	O-6-methylguanine-DNA methyltransferase
ILMN_1800468	8.51e-12	1.73e-13	-8.5809	20.2196	-1.98862	KLKB1	kallikrein B1
ILMN_1665832	1.76e-15	1.44e-17	-10.4881	29.4906	-1.98381	ID1	inhibitor of DNA binding 1, HLH protein
ILMN_1686116	7.38e-11	1.91e-12	-8.08936	17.852	-1.97748	THBS1	thrombospondin 1
ILMN_1713182	1.34e-10	3.72e-12	-7.95198	17.1944	-1.96395
ILMN_1688242	2.48e-07	1.49e-08	-6.19295	9.05469	-1.95494	C6	complement component 6
ILMN_1748323	1.35e-31	5.71e-35	-19.4551	68.8985	-1.95245	CXCL14	C-X-C motif chemokine ligand 14
ILMN_2175220	6.78e-16	4.93e-18	-10.7059	30.5461	-1.94485	CYP39A1	cytochrome P450 family 39 subfamily A member 1
ILMN_1678535	7.76e-22	1.77e-24	-13.8097	45.1952	-1.94261	ESR1	estrogen receptor 1
ILMN_1670572	1.74e-14	1.8e-16	-9.97502	26.9968	-1.9418	IDO2	indoleamine 2,3-dioxygenase 2
ILMN_1694653	2.72e-16	1.73e-18	-10.92	31.5821	-1.94007	CNDP1	carnosine dipeptidase 1
ILMN_2091632	0.000161	1.94e-05	-4.49714	2.09539	-1.94002	CYP2A6	cytochrome P450 family 2 subfamily A member 6
ILMN_1727815	2.96e-16	1.9e-18	-10.9006	31.4882	-1.9392	CFI	complement factor I
ILMN_2389501	4.26e-05	4.42e-06	-4.87045	3.51986	-1.93732	HSD11B1	hydroxysteroid 11-beta dehydrogenase 1
ILMN_1685952	1.15e-16	6.7e-19	-11.1141	32.5186	-1.93641	ACSM3	acyl-CoA synthetase medium-chain family member 3
ILMN_1664798	2.65e-15	2.27e-17	-10.3953	29.0401	-1.93205	GRHPR	glyoxylate and hydroxypyruvate reductase
ILMN_2218104	8.43e-10	2.83e-11	-7.53201	15.1988	-1.92996	PAH	phenylalanine hydroxylase
ILMN_1687080	2.25e-13	3.09e-15	-9.39829	24.1887	-1.92789
ILMN_1812281	1.38e-07	7.76e-09	-6.33578	9.68928	-1.92714	ARG1	arginase 1
ILMN_1656837	9.31e-07	6.39e-08	-5.86697	7.62994	-1.92531	RBP1	retinol binding protein 1
ILMN_1730625	1.97e-09	7.18e-11	-7.33735	14.2826	-1.92025	AHSG	alpha 2-HS glycoprotein
ILMN_1812433	1.82e-07	1.05e-08	-6.26907	9.39212	-1.90792	HP	haptoglobin
ILMN_1728799	2.57e-09	9.63e-11	-7.27567	13.9936	-1.90632	FBP1	fructose-bisphosphatase 1
ILMN_1691156	2.4e-10	7.09e-12	-7.81882	16.5591	-1.90229	MT1A	metallothionein 1A
ILMN_1735192	1.27e-13	1.64e-15	-9.52683	24.8145	-1.89893	COLEC11	collectin subfamily member 11
ILMN_2138019	3.91e-07	2.45e-08	-6.08181	8.56513	-1.89666	HEPACAM	hepatic and glial cell adhesion molecule
ILMN_1686664	1.45e-10	4.05e-12	-7.93415	17.1092	-1.89562	MT2A	metallothionein 2A
ILMN_1790689	5.61e-12	1.08e-13	-8.67634	20.6815	-1.88863	CRISPLD2	cysteine rich secretory protein LCCL domain containing 2
ILMN_1740292	1.7e-20	4.76e-23	-13.1039	41.9469	-1.88801	PANK1	pantothenate kinase 1
ILMN_1664565	1.1e-10	2.99e-12	-7.99702	17.4098	-1.88588	PROZ	protein Z, vitamin K dependent plasma glycoprotein
ILMN_1708183	8.16e-08	4.29e-09	-6.46517	10.2691	-1.88553	PZP	PZP, alpha-2-macroglobulin like
ILMN_1674228	2.33e-14	2.5e-16	-9.90825	26.6718	-1.8828
ILMN_1694075	2.83e-16	1.81e-18	-10.911	31.5383	-1.88028	GADD45A	growth arrest and DNA damage inducible alpha
ILMN_1813206	1.16e-13	1.48e-15	-9.54747	24.915	-1.87205	CP	ceruloplasmin (ferroxidase)
ILMN_2134801	9.74e-11	2.62e-12	-8.02416	17.5397	-1.8636	ETNPPL	ethanolamine-phosphate phospho-lyase
ILMN_1669802	0.000588	8.31e-05	-4.11191	0.703802	-1.85775	CYP8B1	cytochrome P450 family 8 subfamily B member 1
ILMN_2103024	3.5e-16	2.35e-18	-10.8573	31.2789	-1.85716	RBP5	retinol binding protein 5
ILMN_1709237	9.14e-14	1.13e-15	-9.60185	25.1798	-1.85406	EPHX2	epoxide hydrolase 2
ILMN_1754137	6.41e-11	1.64e-12	-8.12072	18.0024	-1.84947	CFHR1	complement factor H related 1
ILMN_1729801	8.8e-08	4.69e-09	-6.44599	10.1829	-1.84668	S100A8	S100 calcium binding protein A8
ILMN_1750974	1.93e-07	1.13e-08	-6.25398	9.32511	-1.83931	S100A9	S100 calcium binding protein A9
ILMN_1677505	7.64e-10	2.54e-11	-7.55426	15.3038	-1.83482	CCL21	C-C motif chemokine ligand 21
ILMN_1789638	2.21e-10	6.48e-12	-7.83744	16.6478	-1.83315	MFSD2A	major facilitator superfamily domain containing 2A
ILMN_1777591	1.16e-13	1.48e-15	-9.54772	24.9162	-1.82799	HOGA1	4-hydroxy-2-oxoglutarate aldolase 1
ILMN_2179018	1.62e-08	7.28e-10	-6.84743	12.0075	-1.82614	NDUFAB1	NADH:ubiquinone oxidoreductase subunit AB1
ILMN_1683792	4.28e-12	8.01e-14	-8.73731	20.9768	-1.82559	LAP3	leucine aminopeptidase 3
ILMN_1684928	1.28e-07	7.13e-09	-6.3543	9.772	-1.8196
ILMN_1778104	4.34e-12	8.13e-14	-8.73418	20.9616	-1.81927	ACADM	acyl-CoA dehydrogenase, C-4 to C-12 straight chain
ILMN_2345292	2.72e-15	2.33e-17	-10.3896	29.0124	-1.80541	FXYD1	FXYD domain containing ion transport regulator 1
ILMN_1867897	2.91e-12	5.23e-14	-8.82412	21.3977	-1.80342
ILMN_2074748	8.16e-12	1.65e-13	-8.58979	20.2626	-1.80211	HAL	histidine ammonia-lyase
ILMN_2124361	2.24e-09	8.23e-11	-7.30852	14.1474	-1.79857	LEAP2	liver enriched antimicrobial peptide 2
ILMN_1810942	5.48e-07	3.54e-08	-5.99968	8.20582	-1.7984	CYP3A5	cytochrome P450 family 3 subfamily A member 5
ILMN_1656011	2e-11	4.49e-13	-8.38566	19.2768	-1.79423	RGS1	regulator of G-protein signaling 1
ILMN_2154654	1.99e-18	8.11e-21	-12.0245	36.8765	-1.79111	PTP4A1	protein tyrosine phosphatase type IVA, member 1
ILMN_1652379	1.06e-11	2.19e-13	-8.53247	19.9855	-1.7889	SUCLG2	succinate-CoA ligase GDP-forming beta subunit
ILMN_1698487	5.51e-12	1.05e-13	-8.68116	20.7048	-1.78855	SDHD	succinate dehydrogenase complex subunit D
ILMN_2071598	4.26e-10	1.33e-11	-7.68899	15.9419	-1.78688	CFHR3	complement factor H related 3
ILMN_2086470	1.07e-21	2.5e-24	-13.735	44.8542	-1.78485	PDGFRA	platelet derived growth factor receptor alpha
ILMN_1718173	1.44e-24	2.05e-27	-15.2984	51.849	-1.78261	CDHR2	cadherin related family member 2
ILMN_2145396	5.09e-08	2.56e-09	-6.57717	10.7747	-1.77725	AKR7A3	aldo-keto reductase family 7 member A3
ILMN_1680618	2.49e-11	5.74e-13	-8.33558	19.0354	-1.77613	MYC	v-myc avian myelocytomatosis viral oncogene homolog
ILMN_1747366	5.63e-19	2.03e-21	-12.3137	38.2462	-1.77344	C11orf96	chromosome 11 open reading frame 96
ILMN_1869048	2.53e-18	1.05e-20	-11.9705	36.6196	-1.77245
ILMN_1751400	1.44e-24	2.02e-27	-15.3026	51.8674	-1.76865	SKAP1	src kinase associated phosphoprotein 1
ILMN_1769388	3.88e-10	1.2e-11	-7.71067	16.0448	-1.76062	GJB2	gap junction protein beta 2
ILMN_1668910	2.73e-12	4.88e-14	-8.83818	21.4659	-1.75901	CIDEB	cell death-inducing DFFA-like effector b
ILMN_1665823	3.17e-15	2.75e-17	-10.3563	28.8507	-1.75797
ILMN_1739263	3.5e-08	1.69e-09	-6.6668	11.1816	-1.75683
ILMN_1713807	5.65e-15	5.07e-17	-10.2319	28.2464	-1.75651	MAN1C1	mannosidase alpha class 1C member 1
ILMN_1651826	2.12e-14	2.24e-16	-9.93044	26.7798	-1.75642	BASP1	brain abundant membrane attached signal protein 1
ILMN_1807745	9.16e-31	4.66e-34	-18.925	66.85	-1.75083	GYS2	glycogen synthase 2
ILMN_1708016	2.6e-12	4.6e-14	-8.84996	21.523	-1.74264	FAM210B	family with sequence similarity 210 member B
ILMN_1793990	3.78e-17	1.94e-19	-11.3686	33.7431	-1.73855	ID2	inhibitor of DNA binding 2, HLH protein
ILMN_2125395	4.11e-32	1.25e-35	-19.844	70.3781	-1.73849	ADGRG7	adhesion G protein-coupled receptor G7
ILMN_2091310	9.66e-15	9.2e-17	-10.1107	27.6571	-1.73714	ANO1	anoctamin 1
ILMN_1667180	2.43e-12	4.27e-14	-8.86528	21.5973	-1.73561
ILMN_1808713	4.65e-09	1.84e-10	-7.13923	13.3569	-1.73413	HSD17B2	hydroxysteroid 17-beta dehydrogenase 2
ILMN_1706117	2.2e-11	4.98e-13	-8.36439	19.1742	-1.73273
ILMN_1739001	2.2e-14	2.34e-16	-9.92168	26.7371	-1.73086	TACSTD2	tumor-associated calcium signal transducer 2
ILMN_1658333	1.19e-44	1.26e-48	-28.6339	99.2027	-1.72375	ECM1	extracellular matrix protein 1
ILMN_1780575	0.00285	0.00052	-3.59237	-1.03201	-1.72097	CRP	C-reactive protein, pentraxin-related
ILMN_1722829	2.49e-12	4.38e-14	-8.85979	21.5707	-1.71671	HLF	HLF, PAR bZIP transcription factor
ILMN_1720829	6.91e-18	3.09e-20	-11.7473	35.5563	-1.71545	ZFP36	ZFP36 ring finger protein
ILMN_1716359	8.11e-16	6.03e-18	-10.6651	30.3486	-1.71494	SLC19A3	solute carrier family 19 member 3
ILMN_1673638	8.07e-11	2.11e-12	-8.06876	17.7532	-1.71124	RPS3A	ribosomal protein S3A
ILMN_1781285	3.47e-10	1.06e-11	-7.73533	16.1619	-1.71099	DUSP1	dual specificity phosphatase 1
ILMN_1769032	1.09e-18	4.26e-21	-12.1585	37.5119	-1.70903	GLYATL1	glycine-N-acyltransferase like 1
ILMN_2141482	6.22e-13	9.35e-15	-9.17361	23.0953	-1.70746	SERPINF1	serpin family F member 1
ILMN_1712112	3.76e-22	8.06e-25	-13.9796	45.9684	-1.70271	RCAN1	regulator of calcineurin 1
ILMN_1672443	1e-11	2.07e-13	-8.54401	20.0412	-1.70268	QDPR	quinoid dihydropteridine reductase
ILMN_1692983	8.84e-06	7.67e-07	-5.29322	5.21343	-1.69978	SULT2A1	sulfotransferase family 2A member 1
ILMN_1737514	1.07e-12	1.75e-14	-9.04639	22.4769	-1.69402	KYNU	kynureninase
ILMN_1735930	1.01e-13	1.26e-15	-9.57982	25.0726	-1.69098	KLF2	Kruppel like factor 2
ILMN_1711642	1.16e-23	1.96e-26	-14.7943	49.627	-1.6854
ILMN_1771118	9.27e-19	3.56e-21	-12.1962	37.6908	-1.67845	SLCO1B1	solute carrier organic anion transporter family member 1B1
ILMN_2184184	1.46e-11	3.19e-13	-8.45558	19.6141	-1.67691	ANXA1	annexin A1
ILMN_1656638	9.42e-05	1.06e-05	-4.65039	2.67157	-1.67601	BHMT	betaine--homocysteine S-methyltransferase
ILMN_1793859	3.16e-11	7.46e-13	-8.28175	18.7762	-1.67596	ALDH2	aldehyde dehydrogenase 2 family (mitochondrial)
ILMN_1749996	3.45e-17	1.76e-19	-11.3883	33.8377	-1.67404	KCNN2	potassium calcium-activated channel subfamily N member 2
ILMN_2129886	1.3e-10	3.58e-12	-7.95962	17.2309	-1.67016	ABCA8	ATP binding cassette subfamily A member 8
ILMN_1812926	6.37e-17	3.49e-19	-11.2477	33.1621	-1.66952	ANTXR2	anthrax toxin receptor 2
ILMN_1744534	1.32e-09	4.63e-11	-7.42888	14.7126	-1.66518	LYRM5	LYR motif containing 5
ILMN_1716733	9.49e-16	7.18e-18	-10.6295	30.1761	-1.66074	MYOM2	myomesin 2
ILMN_1710734	3.47e-11	8.31e-13	-8.25986	18.6709	-1.6602	GZMK	granzyme K
ILMN_1754055	1.24e-05	1.11e-06	-5.2046	4.85185	-1.65878	APOA5	apolipoprotein A5
ILMN_1715068	0.000283	3.66e-05	-4.33162	1.48723	-1.65611	AQP9	aquaporin 9
ILMN_1750678	8.41e-18	3.78e-20	-11.7054	35.3565	-1.65599	TIMD4	T-cell immunoglobulin and mucin domain containing 4
ILMN_1736238	3.35e-05	3.37e-06	-4.93714	3.78158	-1.65092	GNMT	glycine N-methyltransferase
ILMN_1693939	6.01e-29	4.61e-32	-17.7934	62.3554	-1.65074	OIT3	oncoprotein induced transcript 3
ILMN_1701269	1.39e-08	6.14e-10	-6.88394	12.1753	-1.65027	ATP5C1	ATP synthase, H+ transporting, mitochondrial F1 complex, gamma polypeptide 1
ILMN_1707312	9.96e-18	4.52e-20	-11.6687	35.1809	-1.64897	NFIL3	nuclear factor, interleukin 3 regulated
ILMN_1778161	2.46e-14	2.64e-16	-9.8971	26.6175	-1.64681	DNAJC25	DnaJ heat shock protein family (Hsp40) member C25
ILMN_1758034	3.67e-15	3.22e-17	-10.3241	28.6945	-1.6441	ETFDH	electron transfer flavoprotein dehydrogenase
ILMN_1782538	3.36e-09	1.29e-10	-7.2139	13.7049	-1.64172	VIM	vimentin
ILMN_1725366	5.12e-07	3.29e-08	-6.01621	8.27797	-1.64072	SLC27A5	solute carrier family 27 member 5
ILMN_1725427	9.73e-11	2.62e-12	-8.02439	17.5408	-1.63614	B2M	beta-2-microglobulin
ILMN_1683121	2.69e-08	1.27e-09	-6.72842	11.4625	-1.63448	CYP2C18	cytochrome P450 family 2 subfamily C member 18
ILMN_1773395	4.81e-07	3.07e-08	-6.03144	8.34453	-1.63331	RDH5	retinol dehydrogenase 5
ILMN_1785765	4.33e-08	2.14e-09	-6.61617	10.9515	-1.63252	TM9SF2	transmembrane 9 superfamily member 2
ILMN_1738656	1.17e-12	1.94e-14	-9.02591	22.3773	-1.63244	GLOD4	glyoxalase domain containing 4
ILMN_2226324	1.48e-17	7e-20	-11.5783	34.7485	-1.63072	MPC1	mitochondrial pyruvate carrier 1
ILMN_1812700	7.01e-10	2.3e-11	-7.575	15.4019	-1.62939	LIPC	lipase C, hepatic type
ILMN_1729294	4.93e-16	3.46e-18	-10.7784	30.8971	-1.62802	RNF130	ring finger protein 130
ILMN_2380237	9.22e-16	6.95e-18	-10.6359	30.2074	-1.62222	C1QTNF1	C1q and tumor necrosis factor related protein 1
ILMN_2115125	1.67e-09	5.97e-11	-7.37584	14.4632	-1.61344	CTGF	connective tissue growth factor
ILMN_1727360	1.21e-13	1.54e-15	-9.53926	24.875	-1.61294	MAOB	monoamine oxidase B
ILMN_2093027	1.56e-15	1.25e-17	-10.5165	29.6283	-1.61025	MYO1B	myosin IB
ILMN_1725773	3.12e-09	1.19e-10	-7.2317	13.7881	-1.6072	DNAJC12	DnaJ heat shock protein family (Hsp40) member C12
ILMN_1773586	3.62e-07	2.26e-08	-6.09993	8.64468	-1.60329	SLC17A2	solute carrier family 17 member 2
ILMN_1710606	6.68e-08	3.44e-09	-6.51307	10.4849	-1.6032	C8A	complement component 8 alpha subunit
ILMN_1790909	1.31e-09	4.59e-11	-7.43092	14.7222	-1.60271	NFE2L2	nuclear factor, erythroid 2 like 2
ILMN_1688089	8.19e-10	2.73e-11	-7.53887	15.2311	-1.59978	PEBP1	phosphatidylethanolamine binding protein 1
ILMN_1780831	1.07e-08	4.6e-10	-6.94509	12.4571	-1.59932	SLC6A12	solute carrier family 6 member 12
ILMN_1673566	9.71e-24	1.59e-26	-14.8409	49.8338	-1.59703	ADAMTS1	ADAM metallopeptidase with thrombospondin type 1 motif 1
ILMN_1718977	5e-10	1.59e-11	-7.65176	15.7653	-1.59603	GADD45B	growth arrest and DNA damage inducible beta
ILMN_2259467	5.36e-26	5.53e-29	-16.1208	55.4028	-1.59515	N4BP2L1	NEDD4 binding protein 2 like 1
ILMN_1728445	1.52e-05	1.4e-06	-5.14921	4.62757	-1.59488	IGFBP1	insulin like growth factor binding protein 1
ILMN_2121774	2.16e-11	4.89e-13	-8.36824	19.1928	-1.59469	ZG16	zymogen granule protein 16
ILMN_2388547	1.1e-09	3.77e-11	-7.47169	14.9142	-1.59073	EPSTI1	epithelial stromal interaction 1 (breast)
ILMN_2054607	1.77e-09	6.36e-11	-7.36264	14.4013	-1.58142	CYP4V2	cytochrome P450 family 4 subfamily V member 2
ILMN_1667813	4.77e-05	5.01e-06	-4.83907	3.39743	-1.57951
ILMN_1658356	2.44e-21	5.88e-24	-13.5507	44.0097	-1.5795	PAMR1	peptidase domain containing associated with muscle regeneration 1
ILMN_1741204	9.83e-10	3.35e-11	-7.49662	15.0317	-1.5773	KLHDC2	kelch domain containing 2
ILMN_1808657	6.14e-07	4.02e-08	-5.97112	8.08139	-1.57572	FMO3	flavin containing monooxygenase 3
ILMN_1731546	4.97e-08	2.5e-09	-6.58269	10.7997	-1.57343	RPL26	ribosomal protein L26
ILMN_1779855	7.21e-05	7.91e-06	-4.72518	2.95715	-1.57323	HSD17B6	hydroxysteroid 17-beta dehydrogenase 6
ILMN_1693009	7.41e-13	1.16e-14	-9.13068	22.8866	-1.57146	FGL2	fibrinogen like 2
ILMN_1666594	5.49e-12	1.05e-13	-8.68226	20.7101	-1.57096	IRF8	interferon regulatory factor 8
ILMN_1668593	1.11e-07	6.09e-09	-6.38895	9.92699	-1.57051	HPX	hemopexin
ILMN_1764309	1.87e-06	1.38e-07	-5.69289	6.88372	-1.57026	ADH1A	alcohol dehydrogenase 1A (class I), alpha polypeptide
ILMN_1761084	0.001	0.000153	-3.94333	0.121975	-1.56769	FNDC5	fibronectin type III domain containing 5
ILMN_1801077	1.28e-11	2.75e-13	-8.486	19.761	-1.55828	PLIN2	perilipin 2
ILMN_1668012	8.55e-08	4.53e-09	-6.45351	10.2167	-1.55598	SLC25A13	solute carrier family 25 member 13
ILMN_2407082	3.75e-07	2.35e-08	-6.09175	8.60873	-1.55544	2020-09-15	15 kDa selenoprotein
ILMN_1735816	1.11e-06	7.71e-08	-5.8247	7.44777	-1.55519	CYP4A11	cytochrome P450 family 4 subfamily A member 11
ILMN_1701507	3.56e-06	2.79e-07	-5.5301	6.19589	-1.55273	EHHADH	enoyl-CoA, hydratase/3-hydroxyacyl CoA dehydrogenase
ILMN_1672419	2.38e-16	1.49e-18	-10.9503	31.7281	-1.54746	SMARCA2	SWI/SNF related, matrix associated, actin dependent regulator of chromatin, subfamily a, member 2
ILMN_1757747	4.26e-11	1.04e-12	-8.21375	18.4491	-1.54541	ASPDH	aspartate dehydrogenase domain containing
ILMN_1711451	1.17e-10	3.21e-12	-7.98215	17.3386	-1.54526	SLC7A2	solute carrier family 7 member 2
ILMN_1671295	4.54e-14	5.28e-16	-9.75615	25.9313	-1.54186	CCDC3	coiled-coil domain containing 3
ILMN_2389155	8.46e-15	7.83e-17	-10.1435	27.8163	-1.54174	UGP2	UDP-glucose pyrophosphorylase 2
ILMN_2255130	4.91e-23	8.95e-26	-14.4594	48.1332	-1.53797
ILMN_1794951	1.23e-07	6.84e-09	-6.36344	9.81282	-1.53758	SLC39A5	solute carrier family 39 member 5
ILMN_1810275	8.38e-15	7.73e-17	-10.1459	27.8283	-1.53674
ILMN_1811754	3.25e-09	1.24e-10	-7.22222	13.7438	-1.53398	NDUFB10	NADH:ubiquinone oxidoreductase subunit B10
ILMN_1797974	1.95e-09	7.09e-11	-7.33996	14.2948	-1.53324	AIG1	androgen induced 1
ILMN_1721580	2.87e-09	1.08e-10	-7.25064	13.8765	-1.53243	TBX15	T-box 15
ILMN_1809364	1.75e-35	3.25e-39	-22.0463	78.4045	-1.53129	NTF3	neurotrophin 3
ILMN_1661637	7.22e-10	2.37e-11	-7.56844	15.3709	-1.53063	TRPM8	transient receptor potential cation channel subfamily M member 8
ILMN_2148913	8.07e-11	2.11e-12	-8.06891	17.754	-1.52742	TMEM45A	transmembrane protein 45A
ILMN_1757338	1.37e-16	8.24e-19	-11.0717	32.3143	-1.5269	PLSCR4	phospholipid scramblase 4
ILMN_2195236	2.42e-09	8.97e-11	-7.29049	14.063	-1.52572	PGRMC2	progesterone receptor membrane component 2
ILMN_1775501	1.1e-13	1.4e-15	-9.55894	24.9709	-1.52472	IL1B	interleukin 1 beta
ILMN_1779401	2.52e-12	4.45e-14	-8.85683	21.5563	-1.51957	CHP1	calcineurin like EF-hand protein 1
ILMN_1685403	1.88e-07	1.1e-08	-6.26006	9.35211	-1.51888	MMP7	matrix metallopeptidase 7
ILMN_1675448	6.62e-20	2e-22	-12.8002	40.5323	-1.51672	ZFP36L1	ZFP36 ring finger protein like 1
ILMN_1658121	6.46e-32	2.39e-35	-19.6775	69.7468	-1.51647	CFP	complement factor properdin
ILMN_1655930	6.74e-14	8.14e-16	-9.66865	25.5051	-1.51605	ELL2	elongation factor for RNA polymerase II 2
ILMN_1696391	9.53e-11	2.55e-12	-8.02925	17.564	-1.51522	LEPR	leptin receptor
ILMN_1796409	8.18e-09	3.41e-10	-7.00857	12.7505	-1.51494	C1QB	complement C1q B chain
ILMN_2079890	3.49e-06	2.73e-07	-5.53545	6.21829	-1.51492	G6PC	glucose-6-phosphatase catalytic subunit
ILMN_1697448	3.93e-11	9.52e-13	-8.23201	18.5369	-1.51423	TXNIP	thioredoxin interacting protein
ILMN_1749114	0.000427	5.78e-05	-4.21016	1.05067	-1.51274	OTC	ornithine carbamoyltransferase
ILMN_2112638	6.38e-08	3.27e-09	-6.52428	10.5355	-1.51223	SVEP1	sushi, von Willebrand factor type A, EGF and pentraxin domain containing 1
ILMN_2289623	4.07e-22	8.83e-25	-13.9598	45.8784	-1.50979	TTC36	tetratricopeptide repeat domain 36
ILMN_1696187	1.43e-10	3.99e-12	-7.93742	17.1248	-1.5096	PYGL	phosphorylase, glycogen, liver
ILMN_1767113	8.13e-05	9.04e-06	-4.69161	2.82864	-1.50689	AOX1	aldehyde oxidase 1
ILMN_1718853	8.8e-15	8.26e-17	-10.1325	27.7631	-1.50182	UQCRC2	ubiquinol-cytochrome c reductase core protein II
ILMN_1719392	5.13e-08	2.59e-09	-6.57489	10.7644	-1.50024	FH	fumarate hydratase
ILMN_2377288	4.21e-10	1.31e-11	-7.69173	15.9549	-1.49995	CYP3A43	cytochrome P450 family 3 subfamily A member 43
ILMN_2357031	2.19e-19	7.36e-22	-12.5257	39.2455	-1.49922	AADAT	aminoadipate aminotransferase
ILMN_1811193	1.13e-10	3.08e-12	-7.9911	17.3814	-1.49786
ILMN_2066151	1.44e-14	1.44e-16	-10.0197	27.2143	-1.49736	TEK	TEK receptor tyrosine kinase
ILMN_1782958	1.22e-11	2.6e-13	-8.49738	19.8159	-1.49577
ILMN_1664464	0.000667	9.59e-05	-4.07297	0.567857	-1.49376	PTGDS	prostaglandin D2 synthase
ILMN_2159694	5.27e-09	2.12e-10	-7.10975	13.2198	-1.49243	HLA-DRB4	major histocompatibility complex, class II, DR beta 4
ILMN_1760062	5.11e-09	2.04e-10	-7.11711	13.254	-1.48662	IFI44	interferon induced protein 44
ILMN_1660832	3.23e-07	1.99e-08	-6.1287	8.77122	-1.48552
ILMN_2129234	5.28e-16	3.73e-18	-10.763	30.8226	-1.48493	TMEM47	transmembrane protein 47
ILMN_1764861	7.74e-11	2.02e-12	-8.07786	17.7969	-1.48492	ISOC1	isochorismatase domain containing 1
ILMN_2384536	6.22e-11	1.58e-12	-8.12781	18.0364	-1.4849	ECI2	enoyl-CoA delta isomerase 2
ILMN_1788239	2.65e-09	9.95e-11	-7.26879	13.9614	-1.48463	AMDHD1	amidohydrolase domain containing 1
ILMN_2119692	1.14e-16	6.61e-19	-11.1166	32.5306	-1.482	CSAD	cysteine sulfinic acid decarboxylase
ILMN_2149164	4.99e-31	2.24e-34	-19.1085	67.5633	-1.47972	SFRP1	secreted frizzled related protein 1
ILMN_1780141	3.42e-08	1.65e-09	-6.67233	11.2068	-1.47931	SARAF	store-operated calcium entry associated regulatory factor
ILMN_1678643	1.01e-13	1.27e-15	-9.57797	25.0635	-1.47842	FHL2	four and a half LIM domains 2
ILMN_1744381	8.29e-07	5.62e-08	-5.89623	7.75642	-1.4759	SERPINE1	serpin family E member 1
ILMN_1727770	1.05e-07	5.71e-09	-6.40316	9.99064	-1.47268	RGN	regucalcin
ILMN_2228180	3.43e-14	3.83e-16	-9.8213	26.2485	-1.47214	MSRA	methionine sulfoxide reductase A
ILMN_1690979	4.73e-09	1.88e-10	-7.13532	13.3387	-1.47182	SLC17A3	solute carrier family 17 member 3
ILMN_1760778	5.87e-17	3.19e-19	-11.2663	33.2512	-1.46967	ENG	endoglin
ILMN_2331087	9.97e-14	1.25e-15	-9.5819	25.0827	-1.46883	MS4A7	membrane spanning 4-domains A7
ILMN_1893846	2.21e-13	3.02e-15	-9.40293	24.2113	-1.46474	A1CF	APOBEC1 complementation factor
ILMN_1736112	2.69e-19	9.31e-22	-12.4763	39.013	-1.46297	ARHGAP10	Rho GTPase activating protein 10
ILMN_1795007	9.94e-10	3.39e-11	-7.49385	15.0187	-1.46272	C2orf47	chromosome 2 open reading frame 47
ILMN_2123743	8.83e-08	4.72e-09	-6.44472	10.1772	-1.46109	FCER1G	Fc fragment of IgE receptor Ig
ILMN_1678619	5.61e-12	1.08e-13	-8.67648	20.6821	-1.45693	TKFC	triokinase and FMN cyclase
ILMN_1717261	4.05e-09	1.58e-10	-7.17084	13.5041	-1.4556	HLA-DRB3	major histocompatibility complex, class II, DR beta 3
ILMN_1721818	3.97e-15	3.49e-17	-10.3078	28.615	-1.45546	CLDN10	claudin 10
ILMN_1703648	1.37e-08	6.03e-10	-6.88773	12.1928	-1.45497	TMEM82	transmembrane protein 82
ILMN_1801616	1.3e-09	4.54e-11	-7.43313	14.7326	-1.45095	EMP1	epithelial membrane protein 1
ILMN_1773073	1.11e-11	2.33e-13	-8.51985	19.9245	-1.44904	PHYH	phytanoyl-CoA 2-hydroxylase
ILMN_1758731	1.2e-09	4.15e-11	-7.45179	14.8205	-1.44518	CYP2J2	cytochrome P450 family 2 subfamily J member 2
ILMN_1779252	1.42e-10	3.97e-12	-7.93833	17.1292	-1.44423	TRIM22	tripartite motif containing 22
ILMN_1665510	1.14e-07	6.27e-09	-6.3827	9.89901	-1.44321	ERRFI1	ERBB receptor feedback inhibitor 1
ILMN_1699321	5.32e-11	1.32e-12	-8.16442	18.2121	-1.44177
ILMN_1765204	5.95e-06	4.94e-07	-5.39663	5.63954	-1.43962	ST13	suppression of tumorigenicity 13 (colon carcinoma) (Hsp70 interacting protein)
ILMN_1784299	3.79e-11	9.08e-13	-8.24154	18.5827	-1.43851	C19orf43	chromosome 19 open reading frame 43
ILMN_1788131	2.06e-15	1.73e-17	-10.4508	29.3096	-1.43817	CYP26A1	cytochrome P450 family 26 subfamily A member 1
ILMN_1659437	6.73e-06	5.68e-07	-5.36398	5.50455	-1.4369	TXNDC17	thioredoxin domain containing 17
ILMN_2339294	4.11e-30	2.39e-33	-18.5175	65.2506	-1.43685	LILRB5	leukocyte immunoglobulin like receptor B5
ILMN_1754491	2.72e-16	1.72e-18	-10.9211	31.5874	-1.43593	IYD	iodotyrosine deiodinase
ILMN_1741021	6.35e-07	4.18e-08	-5.96262	8.04441	-1.4358	CH25H	cholesterol 25-hydroxylase
ILMN_1807633	1.59e-07	9.04e-09	-6.30234	9.54019	-1.43543	RIDA	reactive intermediate imine deaminase A homolog
ILMN_1854270	2.38e-29	1.64e-32	-18.0454	63.3707	-1.43449
ILMN_2407235	1.6e-06	1.16e-07	-5.73169	7.0491	-1.43186
ILMN_1769633	9.29e-15	8.8e-17	-10.1197	27.7009	-1.42882	CTSO	cathepsin O
ILMN_1772218	2.21e-06	1.65e-07	-5.65094	6.7055	-1.42882	HLA-DPA1	major histocompatibility complex, class II, DP alpha 1
ILMN_1892403	5.11e-08	2.57e-09	-6.57613	10.77	-1.42845	SNORD13	small nucleolar RNA, C/D box 13
ILMN_1787556	0.000431	5.85e-05	-4.20683	1.03885	-1.42268	NPC1L1	NPC1 like intracellular cholesterol transporter 1
ILMN_1654065	1.24e-08	5.39e-10	-6.91153	12.3024	-1.42012	ATOH8	atonal bHLH transcription factor 8
ILMN_1781560	3.14e-13	4.42e-15	-9.32567	23.8352	-1.41804	ST3GAL6	ST3 beta-galactoside alpha-2,3-sialyltransferase 6
ILMN_1656285	1.01e-16	5.84e-19	-11.1422	32.654	-1.41762	METTL7A	methyltransferase like 7A
ILMN_1665855	6.58e-06	5.54e-07	-5.36989	5.52893	-1.41757	CFHR4	complement factor H related 4
ILMN_1730777	1.8e-11	4.02e-13	-8.40842	19.3865	-1.41014	KRT19	keratin 19
ILMN_2051519	1.13e-07	6.18e-09	-6.38573	9.91255	-1.40493	RPL37A	ribosomal protein L37a
ILMN_1757702	1.36e-14	1.36e-16	-10.0308	27.2683	-1.40478
ILMN_2342579	4.06e-09	1.59e-10	-7.16999	13.5001	-1.40306	IL7R	interleukin 7 receptor
ILMN_2184049	1.13e-08	4.86e-10	-6.93353	12.4038	-1.40278	COX7B	cytochrome c oxidase subunit 7B
ILMN_2089752	5.36e-14	6.35e-16	-9.71884	25.7496	-1.40256	FAM150B	family with sequence similarity 150 member B
ILMN_1679646	0.000104	1.19e-05	-4.62272	2.56662	-1.40209	FTCD	formimidoyltransferase cyclodeaminase
ILMN_1720889	5.79e-08	2.94e-09	-6.54699	10.6381	-1.40089	MSMO1	methylsterol monooxygenase 1
ILMN_1807016	1.66e-13	2.21e-15	-9.46576	24.5172	-1.39787	LHX2	LIM homeobox 2
ILMN_1727532	8.67e-14	1.07e-15	-9.61387	25.2384	-1.39689	OLFML3	olfactomedin like 3
ILMN_1773079	3.92e-05	4.02e-06	-4.89385	3.61145	-1.3962	COL3A1	collagen type III alpha 1 chain
ILMN_1897636	1.74e-08	7.9e-10	-6.82989	11.9269	-1.39491
ILMN_2104877	1.11e-11	2.31e-13	-8.52103	19.9302	-1.39431	CMPK1	cytidine/uridine monophosphate kinase 1
ILMN_1675398	1.74e-18	6.93e-21	-12.0572	37.0314	-1.3917	ALDH1B1	aldehyde dehydrogenase 1 family member B1
ILMN_1661917	6.72e-06	5.67e-07	-5.36446	5.5065	-1.39107
ILMN_2045324	2.1e-05	2.02e-06	-5.06194	4.27696	-1.38948	CCL16	C-C motif chemokine ligand 16
ILMN_1701831	0.000137	1.62e-05	-4.54326	2.2675	-1.38883	GSTA1	glutathione S-transferase alpha 1
ILMN_1806533	7.32e-15	6.68e-17	-10.1758	27.9737	-1.3871	PDE7B	phosphodiesterase 7B
ILMN_1661109	1.24e-15	9.64e-18	-10.5694	29.8849	-1.38519	ATF3	activating transcription factor 3
ILMN_1776602	5.22e-06	4.26e-07	-5.43126	5.7832	-1.38439	RNASE4	ribonuclease A family member 4
ILMN_1762735	8.85e-13	1.4e-14	-9.09136	22.6954	-1.3838	EVC2	EvC ciliary complex subunit 2
ILMN_1652230	3.53e-06	2.76e-07	-5.53281	6.20724	-1.38295
ILMN_2213558	1.04e-05	9.12e-07	-5.25209	5.04523	-1.38242	TMED10P1	transmembrane p24 trafficking protein 10 pseudogene 1
ILMN_1734631	6.01e-11	1.52e-12	-8.13538	18.0727	-1.38198	CLYBL	citrate lyase beta like
ILMN_1662962	3.56e-30	1.98e-33	-18.5646	65.4367	-1.37906	COLEC10	collectin subfamily member 10
ILMN_1797875	1.05e-08	4.51e-10	-6.94944	12.4772	-1.37843	ALOX5AP	arachidonate 5-lipoxygenase activating protein
ILMN_1700831	5.91e-07	3.85e-08	-5.98094	8.12417	-1.37833	SLC27A2	solute carrier family 27 member 2
ILMN_1692121	6.15e-09	2.5e-10	-7.07483	13.0575	-1.37806	USO1	USO1 vesicle transport factor
ILMN_1653133	4.98e-08	2.5e-09	-6.58248	10.7987	-1.37801	SH3D19	SH3 domain containing 19
ILMN_1821176	8.58e-11	2.26e-12	-8.05418	17.6834	-1.37676	RNF125	ring finger protein 125
ILMN_1687805	1.22e-05	1.1e-06	-5.20722	4.8625	-1.37599
ILMN_2048414	0.000477	6.56e-05	-4.17598	0.929369	-1.37517	UGT2B15	UDP glucuronosyltransferase family 2 member B15
ILMN_1663092	1.44e-09	5.09e-11	-7.40926	14.6203	-1.37489	CITED2	Cbp/p300 interacting transactivator with Glu/Asp rich carboxy-terminal domain 2
ILMN_1761058	8.81e-13	1.39e-14	-9.09265	22.7017	-1.37366	ACAD11	acyl-CoA dehydrogenase family member 11
ILMN_2124769	4.31e-07	2.73e-08	-6.05806	8.46102	-1.37294	YBX1	Y-box binding protein 1
ILMN_1701877	1.01e-15	7.76e-18	-10.6137	30.0995	-1.37218	AXL	AXL receptor tyrosine kinase
ILMN_1762260	7.01e-08	3.64e-09	-6.50103	10.4307	-1.37069	C3	complement component 3
ILMN_1737308	5.32e-11	1.32e-12	-8.16474	18.2137	-1.37024	GLRX	glutaredoxin
ILMN_1753342	1.96e-13	2.65e-15	-9.4292	24.3392	-1.36788	SAT1	spermidine/spermine N1-acetyltransferase 1
ILMN_2066060	7.49e-16	5.51e-18	-10.6835	30.4379	-1.36693	HLA-DRB6	major histocompatibility complex, class II, DR beta 6 (pseudogene)
ILMN_1737041	1.59e-05	1.47e-06	-5.13788	4.58188	-1.36458	HABP2	hyaluronan binding protein 2
ILMN_2151281	2.09e-10	6.07e-12	-7.85078	16.7114	-1.36412	GABARAPL1	GABA type A receptor associated protein like 1
ILMN_1770800	6.96e-09	2.87e-10	-7.04511	12.9197	-1.35799	PODN	podocan
ILMN_2234187	8.63e-08	4.58e-09	-6.45085	10.2047	-1.35798	CDO1	cysteine dioxygenase type 1
ILMN_1755077	1.8e-07	1.04e-08	-6.27248	9.40731	-1.35745	HEBP2	heme binding protein 2
ILMN_1701114	3.84e-10	1.18e-11	-7.71306	16.0562	-1.35413	GBP1	guanylate binding protein 1
ILMN_1712305	3e-10	9.01e-12	-7.76919	16.3229	-1.3539	CYBRD1	cytochrome b reductase 1
ILMN_1663313	1.48e-06	1.06e-07	-5.75216	7.13655	-1.35272	AMY1C	amylase, alpha 1C (salivary)
ILMN_1785474	4.54e-06	3.64e-07	-5.46791	5.93576	-1.3522	ACOT12	acyl-CoA thioesterase 12
ILMN_1721703	8.83e-08	4.71e-09	-6.44476	10.1774	-1.34926	PNN	pinin, desmosome associated protein
ILMN_1652073	4.38e-08	2.17e-09	-6.61321	10.9381	-1.34877
ILMN_2086077	2.87e-12	5.15e-14	-8.827	21.4116	-1.3473	JUNB	JunB proto-oncogene, AP-1 transcription factor subunit
ILMN_1676629	4.3e-08	2.12e-09	-6.6179	10.9593	-1.34692	INSIG2	insulin induced gene 2
ILMN_1669409	1.22e-11	2.61e-13	-8.49665	19.8124	-1.34572	VSIG4	V-set and immunoglobulin domain containing 4
ILMN_1666384	4.09e-09	1.61e-10	-7.16817	13.4917	-1.34552
ILMN_1735489	2.45e-06	1.85e-07	-5.62472	6.59447	-1.34326	F13B	coagulation factor XIII B chain
ILMN_1688722	7.79e-17	4.37e-19	-11.2018	32.9408	-1.34239	IL13RA2	interleukin 13 receptor subunit alpha 2
ILMN_2089484	3.24e-08	1.55e-09	-6.68536	11.2661	-1.34235	CYP4F3	cytochrome P450 family 4 subfamily F member 3
ILMN_2186369	1.49e-12	2.51e-14	-8.97306	22.1206	-1.34043	NCOR1	nuclear receptor corepressor 1
ILMN_1703123	7.45e-10	2.47e-11	-7.56008	15.3314	-1.34008	CSRNP1	cysteine and serine rich nuclear protein 1
ILMN_1797482	3.39e-12	6.21e-14	-8.78889	21.2268	-1.33932	GCDH	glutaryl-CoA dehydrogenase
ILMN_1672389	1.83e-05	1.72e-06	-5.10045	4.43128	-1.33806	CRYZ	crystallin zeta
ILMN_1814011	3.16e-08	1.51e-09	-6.69102	11.2919	-1.3312
ILMN_1656501	2.38e-07	1.42e-08	-6.2027	9.09782	-1.3311	DUSP5	dual specificity phosphatase 5
ILMN_1741613	1.31e-09	4.59e-11	-7.43103	14.7227	-1.33058	SERINC1	serine incorporator 1
ILMN_2390310	6.94e-19	2.57e-21	-12.264	38.0112	-1.3296
ILMN_1749432	4.61e-13	6.69e-15	-9.24133	23.4248	-1.32814	MRPL32	mitochondrial ribosomal protein L32
ILMN_1689116	1.31e-14	1.3e-16	-10.0404	27.315	-1.32761	PEMT	phosphatidylethanolamine N-methyltransferase
ILMN_1778357	3.21e-07	1.97e-08	-6.13037	8.77855	-1.32696	DNMT3L	DNA methyltransferase 3 like
ILMN_1671365	0.000723	0.000105	-4.04783	0.480608	-1.32661	PRODH	proline dehydrogenase 1
ILMN_1802557	5.23e-11	1.3e-12	-8.16847	18.2316	-1.32625	HEBP1	heme binding protein 1
ILMN_1658639	2.45e-06	1.84e-07	-5.62578	6.59894	-1.32314	SLC46A3	solute carrier family 46 member 3
ILMN_1664449	1.63e-08	7.32e-10	-6.84625	12.0021	-1.32254	ALG5	ALG5, dolichyl-phosphate beta-glucosyltransferase
ILMN_2089329	5.85e-17	3.16e-19	-11.2684	33.2617	-1.32184	SPRY2	sprouty RTK signaling antagonist 2
ILMN_2290808	8.24e-05	9.18e-06	-4.6878	2.81406	-1.32144	RPL21	ribosomal protein L21
ILMN_1731293	1.56e-07	8.87e-09	-6.30666	9.5594	-1.31797	C8B	complement component 8, beta polypeptide
ILMN_1669113	0.000339	4.47e-05	-4.2785	1.29529	-1.31366	ATF5	activating transcription factor 5
ILMN_1747305	1.34e-16	8.04e-19	-11.0765	32.3376	-1.31281	GIMAP8	GTPase, IMAP family member 8
ILMN_1705243	0.000205	2.54e-05	-4.42691	1.83554	-1.31225	SERPINA7	serpin family A member 7
ILMN_1756806	8.53e-15	7.94e-17	-10.1407	27.8027	-1.31042	MCL1	BCL2 family apoptosis regulator
ILMN_1731292	5.31e-05	5.66e-06	-4.80889	3.28015	-1.31009	CA5A	carbonic anhydrase 5A
ILMN_1754894	2.06e-11	4.65e-13	-8.37852	19.2423	-1.30952	C1orf162	chromosome 1 open reading frame 162
ILMN_1674574	9.16e-05	1.03e-05	-4.65816	2.7011	-1.30726	VNN1	vanin 1
ILMN_1699651	8.94e-10	3.02e-11	-7.51792	15.1322	-1.30663	IL6	interleukin 6
ILMN_1787843	3.74e-06	2.94e-07	-5.51783	6.14443	-1.30657	HSDL2	hydroxysteroid dehydrogenase like 2
ILMN_1786353	3.95e-10	1.22e-11	-7.70642	16.0246	-1.30539	CNGA1	cyclic nucleotide gated channel alpha 1
ILMN_1740443	5.72e-07	3.72e-08	-5.98902	8.15936	-1.30129
ILMN_1714167	7.4e-07	4.97e-08	-5.92379	7.8758	-1.30113	CYB5A	cytochrome b5 type A
ILMN_2210753	1.76e-25	2e-28	-15.8258	54.1382	-1.30012	LYVE1	lymphatic vessel endothelial hyaluronan receptor 1
ILMN_1754178	2.64e-06	2.01e-07	-5.60632	6.51667	-1.29931	GDI2	GDP dissociation inhibitor 2
ILMN_1668055	0.000614	8.75e-05	-4.09805	0.655315	-1.29872	SAA4	serum amyloid A4, constitutive
ILMN_1727091	2.42e-06	1.82e-07	-5.62868	6.61123	-1.29858	ACMSD	aminocarboxymuconate semialdehyde decarboxylase
ILMN_2280960	4.35e-30	2.64e-33	-18.4928	65.1531	-1.2963	DEPDC7	DEP domain containing 7
ILMN_2168747	0.00175	0.000293	-3.75983	-0.491309	-1.29418	GSTA2	glutathione S-transferase alpha 2
ILMN_1727284	3.42e-20	9.84e-23	-12.9499	41.231	-1.29405	CD4	CD4 molecule
ILMN_1701603	7.16e-05	7.86e-06	-4.72696	2.964	-1.29124	ALPL	alkaline phosphatase, liver/bone/kidney
ILMN_1743199	3.48e-23	6.25e-26	-14.5384	48.4865	-1.29105	EGR2	early growth response 2
ILMN_2189815	2e-10	5.77e-12	-7.86144	16.7622	-1.2909	SLC22A10	solute carrier family 22 member 10
ILMN_1700183	3.62e-09	1.4e-10	-7.19642	13.6233	-1.29066	APLNR	apelin receptor
ILMN_1756417	7.48e-07	5.03e-08	-5.9211	7.86414	-1.29002	ANKRD37	ankyrin repeat domain 37
ILMN_1756139	6.5e-13	9.87e-15	-9.16257	23.0416	-1.28933
ILMN_1738062	3.95e-08	1.93e-09	-6.63808	11.051	-1.28842	CYP2D7	cytochrome P450 family 2 subfamily D member 7 (gene/pseudogene)
ILMN_1698770	4.42e-16	3.04e-18	-10.8048	31.0251	-1.28786	NADK2	NAD kinase 2, mitochondrial
ILMN_1695446	6.72e-13	1.02e-14	-9.15514	23.0055	-1.28777	AMBP	alpha-1-microglobulin/bikunin precursor
ILMN_1658015	1.59e-13	2.11e-15	-9.47506	24.5624	-1.28756	MBNL2	muscleblind like splicing regulator 2
ILMN_1823221	2.05e-10	5.96e-12	-7.85459	16.7296	-1.28522
ILMN_2052924	1.01e-14	9.63e-17	-10.1015	27.612	-1.28237	IL33	interleukin 33
ILMN_2157441	4.83e-06	3.91e-07	-5.4513	5.86654	-1.28192	HLA-DRA	major histocompatibility complex, class II, DR alpha
ILMN_1738816	3.82e-12	7.09e-14	-8.76207	21.0968	-1.28122	FOXO1	forkhead box O1
ILMN_1720838	2.44e-08	1.14e-09	-6.75142	11.5676	-1.27853	DECR1	2,4-dienoyl-CoA reductase 1, mitochondrial
ILMN_1815530	2.97e-11	6.99e-13	-8.29512	18.8405	-1.27808	GCKR	glucokinase (hexokinase 4) regulator
ILMN_1791306	7.53e-13	1.18e-14	-9.12677	22.8676	-1.2755	IDNK	IDNK, gluconokinase
ILMN_1729439	3.44e-09	1.33e-10	-7.20856	13.68	-1.27381	CYP4F2	cytochrome P450 family 4 subfamily F member 2
ILMN_1652342	3.02e-08	1.44e-09	-6.7016	11.3401	-1.2731
ILMN_1804656	1.95e-11	4.37e-13	-8.39134	19.3041	-1.27289	COX14	COX14, cytochrome c oxidase assembly factor
ILMN_1746128	1.53e-05	1.41e-06	-5.1484	4.62433	-1.27149	ACSM2B	acyl-CoA synthetase medium-chain family member 2B
ILMN_1732328	5.76e-06	4.75e-07	-5.40583	5.67767	-1.27091
ILMN_1714446	8.75e-05	9.82e-06	-4.67084	2.74937	-1.27046	PLG	plasminogen
ILMN_1801852	1.79e-05	1.68e-06	-5.10638	4.45507	-1.26974	SEC61B	Sec61 translocon beta subunit
ILMN_1784967	2.4e-19	8.19e-22	-12.5033	39.1401	-1.26895	EPB41L4B	erythrocyte membrane protein band 4.1 like 4B
ILMN_1788122	3.87e-11	9.34e-13	-8.23576	18.5549	-1.26881	GSTA5	glutathione S-transferase alpha 5
ILMN_2045453	7.91e-05	8.77e-06	-4.69932	2.85811	-1.26818	CFHR2	complement factor H related 2
ILMN_2347789	1.35e-07	7.59e-09	-6.3407	9.71122	-1.268	C4BPB	complement component 4 binding protein beta
ILMN_1679324	1.56e-07	8.84e-09	-6.30735	9.56249	-1.26718	EIF1B	eukaryotic translation initiation factor 1B
ILMN_1793628	9.8e-08	5.27e-09	-6.42028	10.0674	-1.26572	SERPINA10	serpin family A member 10
ILMN_1659405	1.45e-09	5.13e-11	-7.40777	14.6133	-1.26467
ILMN_1733288	2.68e-12	4.79e-14	-8.84187	21.4837	-1.26452	C1RL	complement C1r subcomponent like
ILMN_1738866	3.65e-08	1.77e-09	-6.65719	11.1379	-1.26202	DEXI	Dexi homolog
ILMN_1783394	9.06e-07	6.21e-08	-5.87372	7.6591	-1.26143	ATF4	activating transcription factor 4
ILMN_2151739	2.73e-08	1.29e-09	-6.72464	11.4452	-1.2609	CAT	catalase
ILMN_1778977	9.08e-08	4.86e-09	-6.43823	10.148	-1.2601	TYROBP	TYRO protein tyrosine kinase binding protein
ILMN_1800008	1.79e-09	6.46e-11	-7.35944	14.3862	-1.25532	ACAT1	acetyl-CoA acetyltransferase 1
ILMN_1781536	2.46e-12	4.33e-14	-8.86218	21.5823	-1.25482	FAH	fumarylacetoacetate hydrolase
ILMN_2369682	7.16e-06	6.08e-07	-5.348	5.43863	-1.25434	HNRNPA2B1	heterogeneous nuclear ribonucleoprotein A2/B1
ILMN_1676765	4.11e-07	2.59e-08	-6.06933	8.51041	-1.25324
ILMN_2166457	0.0014	0.000226	-3.83466	-0.243791	-1.253	HPGD	hydroxyprostaglandin dehydrogenase 15-(NAD)
ILMN_2092118	9.18e-14	1.14e-15	-9.6005	25.1733	-1.25265	FPR1	formyl peptide receptor 1
ILMN_1750062	1.92e-05	1.82e-06	-5.08666	4.37596	-1.25238	PPARGC1A	PPARG coactivator 1 alpha
ILMN_1862909	3.19e-10	9.69e-12	-7.75432	16.2522	-1.24986	RORA	RAR related orphan receptor A
ILMN_1786720	3.26e-06	2.52e-07	-5.55337	6.29356	-1.24959	PROM1	prominin 1
ILMN_1789751	4.22e-05	4.36e-06	-4.87329	3.53095	-1.2493	MFSD1	major facilitator superfamily domain containing 1
ILMN_1680110	0.000102	1.17e-05	-4.62607	2.57931	-1.24797	ADIRF	adipogenesis regulatory factor
ILMN_1668507	5.12e-06	4.17e-07	-5.43646	5.80482	-1.24688	DDAH1	dimethylarginine dimethylaminohydrolase 1
ILMN_1758128	1.66e-08	7.49e-10	-6.84152	11.9803	-1.24583	CYGB	cytoglobin
ILMN_1800540	3.02e-10	9.1e-12	-7.76717	16.3133	-1.24562	CD55	CD55 molecule (Cromer blood group)
ILMN_2172174	5.1e-13	7.45e-15	-9.21961	23.3191	-1.24504	PNP	purine nucleoside phosphorylase
ILMN_1712632	2.72e-09	1.02e-10	-7.26282	13.9335	-1.24503	XDH	xanthine dehydrogenase
ILMN_1665775	8.84e-11	2.34e-12	-8.04716	17.6498	-1.24424	MARC2	mitochondrial amidoxime reducing component 2
ILMN_1662944	8.89e-07	6.08e-08	-5.87845	7.67953	-1.24302	PON1	paraoxonase 1
ILMN_1815719	4.92e-10	1.56e-11	-7.65563	15.7837	-1.24282	PLCG2	phospholipase C gamma 2
ILMN_1671621	7.28e-07	4.89e-08	-5.92749	7.89184	-1.24215	PCMT1	protein-L-isoaspartate (D-aspartate) O-methyltransferase
ILMN_1732296	4.55e-07	2.9e-08	-6.04451	8.40167	-1.23863	ID3	inhibitor of DNA binding 3, HLH protein
ILMN_1724493	8.86e-07	6.05e-08	-5.87964	7.68464	-1.23833	LYSMD2	LysM domain containing 2
ILMN_1666670	1.39e-06	9.85e-08	-5.76905	7.20886	-1.2379	RBX1	ring-box 1
ILMN_1800697	2.35e-11	5.37e-13	-8.34895	19.0998	-1.23685	LDB2	LIM domain binding 2
ILMN_1684922	2.93e-07	1.78e-08	-6.15246	8.87589	-1.23498
ILMN_2062468	3.45e-06	2.69e-07	-5.53858	6.23144	-1.2334	IGFBP7	insulin like growth factor binding protein 7
ILMN_2211950	8.67e-07	5.89e-08	-5.8854	7.70955	-1.23325
ILMN_1710937	1.57e-12	2.66e-14	-8.96124	22.0632	-1.2306	IFI16	interferon gamma inducible protein 16
ILMN_1704876	3.32e-07	2.05e-08	-6.12164	8.74012	-1.22977	USP38	ubiquitin specific peptidase 38
ILMN_2228976	6.83e-07	4.55e-08	-5.94378	7.96255	-1.2296	EIF1AY	eukaryotic translation initiation factor 1A, Y-linked
ILMN_1711617	2.96e-16	1.9e-18	-10.9003	31.4866	-1.22784	GMFG	glia maturation factor gamma
ILMN_1673563	2.21e-19	7.47e-22	-12.5227	39.2311	-1.22707
ILMN_1697967	4.22e-05	4.36e-06	-4.87338	3.5313	-1.22607	UGT1A4	UDP glucuronosyltransferase family 1 member A4
ILMN_1784287	1.02e-08	4.36e-10	-6.95674	12.5109	-1.22527	TGFBR3	transforming growth factor beta receptor 3
ILMN_1798177	5.72e-07	3.71e-08	-5.98908	8.15962	-1.22516	CHURC1	churchill domain containing 1
ILMN_1686291	0.000331	4.36e-05	-4.2853	1.31978	-1.22513	DIO1	deiodinase, iodothyronine type I
ILMN_1662587	3.49e-07	2.17e-08	-6.10884	8.68381	-1.22371	PNPLA7	patatin like phospholipase domain containing 7
ILMN_2168217	1.16e-16	6.83e-19	-11.1101	32.4993	-1.22322	GPR183	G protein-coupled receptor 183
ILMN_1809212	0.00032	4.2e-05	-4.2955	1.35654	-1.22196	HPR	haptoglobin-related protein
ILMN_1795104	1.9e-10	5.45e-12	-7.87308	16.8177	-1.2219	ACADS	acyl-CoA dehydrogenase, C-2 to C-3 short chain
ILMN_1686884	1.77e-16	1.08e-18	-11.0161	32.0461	-1.21951	IL1RAP	interleukin 1 receptor accessory protein
ILMN_2146657	4.77e-16	3.33e-18	-10.7862	30.935	-1.21895	FAHD2B	fumarylacetoacetate hydrolase domain containing 2B
ILMN_1677511	7.85e-23	1.58e-25	-14.3352	47.5754	-1.2184	PTGS2	prostaglandin-endoperoxide synthase 2
ILMN_1661174	3.2e-11	7.59e-13	-8.27837	18.7599	-1.21812
ILMN_2222234	8.36e-09	3.5e-10	-7.00335	12.7263	-1.21792	PRDX4	peroxiredoxin 4
ILMN_1682176	1.93e-18	7.81e-21	-12.0324	36.9137	-1.2141	CLEC3B	C-type lectin domain family 3 member B
ILMN_1678522	4.87e-08	2.44e-09	-6.58773	10.8225	-1.21408
ILMN_1768510	1.12e-07	6.11e-09	-6.38829	9.92405	-1.21381	MAN2B2	mannosidase alpha class 2B member 2
ILMN_1809291	1.18e-07	6.51e-09	-6.37418	9.86089	-1.21375	TSPAN7	tetraspanin 7
ILMN_1803676	6.64e-07	4.4e-08	-5.95106	7.99417	-1.21264	ENOSF1	enolase superfamily member 1
ILMN_1718424	6.28e-06	5.25e-07	-5.38246	5.58089	-1.21199	MRPS28	mitochondrial ribosomal protein S28
ILMN_1664010	8.86e-10	2.99e-11	-7.52012	15.1426	-1.21025	ELF1	E74 like ETS transcription factor 1
ILMN_1813975	5.87e-17	3.2e-19	-11.2657	33.2483	-1.20983	ADI1	acireductone dioxygenase 1
ILMN_1751258	7.88e-05	8.74e-06	-4.70017	2.86136	-1.20881	NDUFA4	NDUFA4, mitochondrial complex associated
ILMN_1781700	2.76e-25	3.29e-28	-15.7129	53.6513	-1.20559	IL18R1	interleukin 18 receptor 1
ILMN_1736178	1.53e-05	1.41e-06	-5.14847	4.62461	-1.20226	AEBP1	AE binding protein 1
ILMN_2090558	9e-09	3.8e-10	-6.98584	12.6453	-1.20173	MMADHC	methylmalonic aciduria and homocystinuria, cblD type
ILMN_1684497	2.22e-05	2.14e-06	-5.04754	4.21943	-1.20139	PYROXD2	pyridine nucleotide-disulphide oxidoreductase domain 2
ILMN_2197846	1.15e-10	3.14e-12	-7.9866	17.3599	-1.20132	HADHB	hydroxyacyl-CoA dehydrogenase/3-ketoacyl-CoA thiolase/enoyl-CoA hydratase (trifunctional protein), beta subunit
ILMN_1794875	3.92e-09	1.53e-10	-7.17767	13.5359	-1.19977	GPAT3	glycerol-3-phosphate acyltransferase 3
ILMN_1699665	3.19e-11	7.54e-13	-8.27976	18.7666	-1.19887	CLIC6	chloride intracellular channel 6
ILMN_2391512	2.37e-21	5.63e-24	-13.5599	44.0522	-1.19884	NAAA	N-acylethanolamine acid amidase
ILMN_1755954	4.63e-11	1.14e-12	-8.19587	18.3632	-1.19882	CPEB3	cytoplasmic polyadenylation element binding protein 3
ILMN_1735347	2.38e-12	4.17e-14	-8.87022	21.6213	-1.19821	MCEE	methylmalonyl-CoA epimerase
ILMN_1791576	2.96e-12	5.33e-14	-8.82018	21.3785	-1.1982	CHSY1	chondroitin sulfate synthase 1
ILMN_1812726	7.16e-10	2.35e-11	-7.57035	15.3799	-1.19736	MORF4L1	mortality factor 4 like 1
ILMN_1736412	6.47e-28	5.48e-31	-17.1999	59.931	-1.19667	AMHR2	anti-Mullerian hormone receptor type 2
ILMN_1790026	1.23e-13	1.58e-15	-9.53385	24.8487	-1.19601	SFRP5	secreted frizzled related protein 5
ILMN_2160209	0.00137	0.000221	-3.84095	-0.222832	-1.19557	EPCAM	epithelial cell adhesion molecule
ILMN_1789702	1.47e-05	1.35e-06	-5.1577	4.66186	-1.19498	GBE1	glucan (1,4-alpha-), branching enzyme 1
ILMN_2053415	1.3e-12	2.18e-14	-9.00166	22.2595	-1.19171	LDLR	low density lipoprotein receptor
ILMN_1744817	0.00141	0.000227	-3.8333	-0.2483	-1.1903	UGT1A1	UDP glucuronosyltransferase family 1 member A1
ILMN_1672843	1.5e-11	3.29e-13	-8.44912	19.5829	-1.18849	FBXO8	F-box protein 8
ILMN_1659550	8.74e-07	5.96e-08	-5.88292	7.69886	-1.18812
ILMN_1795190	0.000626	8.93e-05	-4.09242	0.635637	-1.18699	CLDN2	claudin 2
ILMN_1731785	1.08e-05	9.55e-07	-5.2413	5.0012	-1.18456	ORM2	orosomucoid 2
ILMN_1790810	2.22e-08	1.03e-09	-6.7733	11.6676	-1.18384	HCN4	hyperpolarization activated cyclic nucleotide gated potassium channel 4
ILMN_1810752	0.000847	0.000126	-3.99843	0.310238	-1.1838	C4BPA	complement component 4 binding protein alpha
ILMN_2121389	2.15e-10	6.27e-12	-7.84427	16.6803	-1.18377	ACOT1	acyl-CoA thioesterase 1
ILMN_1670817	2.13e-08	9.82e-10	-6.78356	11.7146	-1.18348	GRPEL1	GrpE like 1, mitochondrial
ILMN_2105573	2.28e-07	1.36e-08	-6.21247	9.14107	-1.18177	CCL3L3	C-C motif chemokine ligand 3 like 3
ILMN_1755536	7.84e-06	6.72e-07	-5.32455	5.34208	-1.18175	PFDN5	prefoldin subunit 5
ILMN_1797154	3.1e-06	2.39e-07	-5.56623	6.34764	-1.18125	AZGP1	alpha-2-glycoprotein 1, zinc-binding
ILMN_1685043	0.00421	0.000827	-3.45353	-1.46608	-1.17926	CYP3A7	cytochrome P450 family 3 subfamily A member 7
ILMN_1782579	4.66e-06	3.76e-07	-5.46057	5.90518	-1.17753	IMMT	inner membrane mitochondrial protein
ILMN_1678816	1.35e-06	9.58e-08	-5.77537	7.23592	-1.17742	GREM2	gremlin 2, DAN family BMP antagonist
ILMN_2122420	1.29e-13	1.67e-15	-9.52235	24.7927	-1.17645	HMGCL	3-hydroxymethyl-3-methylglutaryl-CoA lyase
ILMN_1812678	1.14e-12	1.89e-14	-9.03097	22.4019	-1.17579	AGMO	alkylglycerol monooxygenase
ILMN_1768062	2.34e-16	1.46e-18	-10.9543	31.7479	-1.17572	ADK	adenosine kinase
ILMN_2109416	2.9e-10	8.68e-12	-7.77698	16.36	-1.17564	NAPSB	napsin B aspartic peptidase, pseudogene
ILMN_1687858	5.59e-05	6e-06	-4.79455	3.22457	-1.17489	CALM2	calmodulin 2
ILMN_1785902	1.84e-05	1.73e-06	-5.09838	4.42296	-1.17444	C1QC	complement C1q C chain
ILMN_1779014	1.02e-08	4.34e-10	-6.95778	12.5157	-1.1734	TSPYL1	TSPY like 1
ILMN_1664577	5.56e-08	2.82e-09	-6.55628	10.6801	-1.17143	DLD	dihydrolipoamide dehydrogenase
ILMN_1814213	5.7e-08	2.9e-09	-6.55043	10.6537	-1.16969	PQLC3	PQ loop repeat containing 3
ILMN_1761577	5.25e-09	2.11e-10	-7.11072	13.2243	-1.16966	STEAP3	STEAP3 metalloreductase
ILMN_1747442	4.15e-14	4.75e-16	-9.7777	26.0362	-1.16962	P4HA1	prolyl 4-hydroxylase subunit alpha 1
ILMN_1765605	0.00247	0.00044	-3.64211	-0.873339	-1.16917	APOC4	apolipoprotein C4
ILMN_1714577	0.000242	3.07e-05	-4.37799	1.65609	-1.16903	OGDHL	oxoglutarate dehydrogenase-like
ILMN_2065745	2.64e-10	7.87e-12	-7.79718	16.4561	-1.16835	RAMP3	receptor (G protein-coupled) activity modifying protein 3
ILMN_2058512	4.39e-08	2.17e-09	-6.61276	10.936	-1.16757	PSMA2	proteasome subunit alpha 2
ILMN_2401253	9.65e-16	7.32e-18	-10.6253	30.156	-1.16656	FAM13A	family with sequence similarity 13 member A
ILMN_1810233	0.000281	3.63e-05	-4.33391	1.49554	-1.16562	UGT2B11	UDP glucuronosyltransferase family 2 member B11
ILMN_1711729	1.55e-06	1.12e-07	-5.74058	7.08707	-1.16393	UQCRBP1	ubiquinol-cytochrome c reductase binding protein pseudogene 1
ILMN_1727402	7.79e-09	3.24e-10	-7.01958	12.8014	-1.16215	HCLS1	hematopoietic cell-specific Lyn substrate 1
ILMN_1778561	5.53e-09	2.23e-10	-7.09874	13.1686	-1.15716	WEE1	WEE1 G2 checkpoint kinase
ILMN_1737988	6.47e-07	4.28e-08	-5.95744	8.02188	-1.15637	PRNP	prion protein
ILMN_1676192	0.00459	0.000917	-3.42215	-1.56235	-1.15628	SLC13A5	solute carrier family 13 member 5
ILMN_1729191	1.21e-11	2.57e-13	-8.49979	19.8276	-1.15332	CYP2C19	cytochrome P450 family 2 subfamily C member 19
ILMN_2183687	1.25e-05	1.13e-06	-5.20153	4.83941	-1.15323	LIME1	Lck interacting transmembrane adaptor 1
ILMN_1715991	4.04e-13	5.8e-15	-9.27033	23.5659	-1.15321	SDPR	serum deprivation response
ILMN_1742461	5.44e-11	1.35e-12	-8.1598	18.19	-1.15157	UAP1	UDP-N-acetylglucosamine pyrophosphorylase 1
ILMN_1904578	2.06e-10	6e-12	-7.85345	16.7241	-1.15087	TENM1	teneurin transmembrane protein 1
ILMN_1714765	1.62e-14	1.65e-16	-9.99233	27.081	-1.14989
ILMN_1769158	4.85e-09	1.93e-10	-7.12943	13.3112	-1.14847	ISOC2	isochorismatase domain containing 2
ILMN_1708340	6.05e-14	7.22e-16	-9.69276	25.6226	-1.14581	DAPK1	death associated protein kinase 1
ILMN_1767349	0.000382	5.12e-05	-4.24247	1.166	-1.14395	ABCB4	ATP binding cassette subfamily B member 4
ILMN_2070792	4.8e-05	5.05e-06	-4.83715	3.38994	-1.14328	ACSM5	acyl-CoA synthetase medium-chain family member 5
ILMN_1764175	4.15e-12	7.75e-14	-8.74387	21.0086	-1.14271	GPD1	glycerol-3-phosphate dehydrogenase 1
ILMN_1800739	0.00123	0.000195	-3.87606	-0.105317	-1.14027	SPINT2	serine peptidase inhibitor, Kunitz type 2
ILMN_1778401	3.59e-06	2.81e-07	-5.528	6.18707	-1.14007	HLA-B	major histocompatibility complex, class I, B
ILMN_1672755	0.00107	0.000164	-3.92437	0.057653	-1.14001
ILMN_2386444	1.42e-06	1.01e-07	-5.76283	7.18223	-1.13792	ANGPTL4	angiopoietin like 4
ILMN_1728975	2.09e-07	1.23e-08	-6.2344	9.23823	-1.13775	SCO1	SCO1 cytochrome c oxidase assembly protein
ILMN_1656145	1.28e-07	7.11e-09	-6.35512	9.77566	-1.13477	GOT1	glutamic-oxaloacetic transaminase 1
ILMN_1802167	0.00969	0.00228	-3.13516	-2.41041	-1.13453	ALDH1L1	aldehyde dehydrogenase 1 family member L1
ILMN_1660114	3.35e-16	2.23e-18	-10.8683	31.332	-1.13377	MMRN1	multimerin 1
ILMN_1684106	0.00028	3.62e-05	-4.33474	1.49857	-1.13343	NR1I3	nuclear receptor subfamily 1 group I member 3
ILMN_1761450	4.44e-10	1.4e-11	-7.6786	15.8926	-1.13312	DHRS4L2	dehydrogenase/reductase 4 like 2
ILMN_1788468	4.08e-05	4.2e-06	-4.88288	3.56846	-1.1319	ARGLU1	arginine and glutamate rich 1
ILMN_2315044	2.72e-06	2.07e-07	-5.59897	6.48565	-1.13134	FGG	fibrinogen gamma chain
ILMN_1651228	5.48e-10	1.75e-11	-7.63147	15.6692	-1.13096	RPS28	ribosomal protein S28
ILMN_1844464	1.29e-13	1.67e-15	-9.5231	24.7963	-1.13057
ILMN_2180864	4.89e-06	3.97e-07	-5.44781	5.85204	-1.12979	RPS26P11	ribosomal protein S26 pseudogene 11
ILMN_1788802	4.72e-15	4.21e-17	-10.2696	28.4297	-1.12932	GCH1	GTP cyclohydrolase 1
ILMN_2361603	4.51e-11	1.1e-12	-8.20149	18.3902	-1.12714	NDRG2	NDRG family member 2
ILMN_1701361	4.57e-14	5.33e-16	-9.75432	25.9223	-1.1265	LURAP1L	leucine rich adaptor protein 1 like
ILMN_1670099	6.62e-18	2.92e-20	-11.7586	35.6104	-1.12208	NOSTRIN	nitric oxide synthase trafficking
ILMN_1698551	2.03e-07	1.19e-08	-6.2423	9.27325	-1.12169	RCN1	reticulocalbin 1
ILMN_1734559	4.54e-07	2.89e-08	-6.04501	8.40387	-1.12084
ILMN_1670117	8.42e-17	4.74e-19	-11.1847	32.8589	-1.11991	ABAT	4-aminobutyrate aminotransferase
ILMN_2289849	5.35e-12	1.02e-13	-8.68795	20.7377	-1.11988	FCGR2A	Fc fragment of IgG receptor IIa
ILMN_1675325	2.53e-16	1.59e-18	-10.9365	31.6617	-1.11911	ENPEP	glutamyl aminopeptidase
ILMN_2359907	5.37e-09	2.16e-10	-7.1053	13.1991	-1.11826	CD68	CD68 molecule
ILMN_1782429	5.85e-09	2.37e-10	-7.08586	13.1087	-1.11787	TMEM56	transmembrane protein 56
ILMN_2374159	1.74e-06	1.27e-07	-5.71026	6.95768	-1.11309
ILMN_2053103	2.13e-07	1.25e-08	-6.23041	9.22051	-1.1129	SLC40A1	solute carrier family 40 member 1
ILMN_1720771	5.13e-13	7.51e-15	-9.21803	23.3114	-1.11179	STX11	syntaxin 11
ILMN_2372398	7.45e-10	2.47e-11	-7.56024	15.3321	-1.11156	ALDH5A1	aldehyde dehydrogenase 5 family member A1
ILMN_1726647	7.87e-06	6.75e-07	-5.32336	5.3372	-1.11152
ILMN_1764361	7.1e-13	1.1e-14	-9.14014	22.9326	-1.11082	DUSP16	dual specificity phosphatase 16
ILMN_1695316	6.35e-12	1.25e-13	-8.6469	20.539	-1.1097	SLC39A8	solute carrier family 39 member 8
ILMN_1801246	0.00183	0.00031	-3.74398	-0.543252	-1.10934	IFITM1	interferon induced transmembrane protein 1
ILMN_2081162	2.6e-12	4.62e-14	-8.84897	21.5182	-1.1084	SH3BGRL	SH3 domain binding glutamate rich protein like
ILMN_1785284	7.09e-07	4.74e-08	-5.93444	7.92198	-1.10824	ALDH6A1	aldehyde dehydrogenase 6 family member A1
ILMN_2188333	1.33e-16	7.96e-19	-11.0788	32.3482	-1.10782	CD69	CD69 molecule
ILMN_2339955	1.26e-14	1.24e-16	-10.0497	27.3602	-1.10764	NR4A2	nuclear receptor subfamily 4 group A member 2
ILMN_1709634	7.4e-05	8.15e-06	-4.71788	2.92918	-1.10656	CMBL	carboxymethylenebutenolidase homolog
ILMN_2047511	6.5e-05	7.06e-06	-4.75381	3.06724	-1.10575	ADAP1	ArfGAP with dual PH domains 1
ILMN_1798947	3.35e-26	3.27e-29	-16.2415	55.9168	-1.10486	ANKRD55	ankyrin repeat domain 55
ILMN_2260643	1.31e-05	1.19e-06	-5.18813	4.78505	-1.10477	LPA	lipoprotein(a)
ILMN_1738712	2.97e-07	1.81e-08	-6.14889	8.86016	-1.10459	GPR180	G protein-coupled receptor 180
ILMN_2087080	4.84e-06	3.92e-07	-5.45067	5.86394	-1.10264	RPL5	ribosomal protein L5
ILMN_1662880	0.0425	0.0157	-2.46006	-4.15977	-1.10189
ILMN_1772910	7.99e-19	3.04e-21	-12.2286	37.844	-1.10178	GAS1	growth arrest specific 1
ILMN_1707070	0.000298	3.88e-05	-4.31614	1.43113	-1.10172	PCOLCE	procollagen C-endopeptidase enhancer
ILMN_1689378	1.66e-06	1.2e-07	-5.72387	7.01572	-1.10171	NOCT	nocturnin
ILMN_1715169	0.00195	0.000333	-3.7232	-0.611164	-1.09919	HLA-DRB1	major histocompatibility complex, class II, DR beta 1
ILMN_1690884	0.000295	3.84e-05	-4.31914	1.442	-1.09903	APOA1	apolipoprotein A1
ILMN_1664176	1.4e-10	3.9e-12	-7.94201	17.1468	-1.09853	FBLN5	fibulin 5
ILMN_1700674	8.75e-10	2.95e-11	-7.52305	15.1564	-1.09772
ILMN_1686623	1.86e-08	8.47e-10	-6.81511	11.8592	-1.09479	CSF1R	colony stimulating factor 1 receptor
ILMN_1816342	2.66e-07	1.6e-08	-6.17622	8.98075	-1.09386
ILMN_1696708	6.4e-07	4.23e-08	-5.9602	8.03392	-1.09259	C14orf166	chromosome 14 open reading frame 166
ILMN_1679754	4.08e-07	2.57e-08	-6.07097	8.51759	-1.09257	ADRA1B	adrenoceptor alpha 1B
ILMN_1678579	9.19e-12	1.88e-13	-8.56303	20.1332	-1.09206	CPT2	carnitine palmitoyltransferase 2
ILMN_1651899	0.000207	2.57e-05	-4.42454	1.82679	-1.09195
ILMN_1677262	3.08e-13	4.32e-15	-9.33018	23.8571	-1.09156
ILMN_1657529	1.22e-09	4.22e-11	-7.44828	14.8039	-1.0899	CYP2B6	cytochrome P450 family 2 subfamily B member 6
ILMN_1653120	2.7e-06	2.05e-07	-5.60102	6.49429	-1.08863	ST6GAL1	ST6 beta-galactoside alpha-2,6-sialyltransferase 1
ILMN_2221808	3.53e-05	3.58e-06	-4.92199	3.72194	-1.08675	DGCR5	DiGeorge syndrome critical region gene 5 (non-protein coding)
ILMN_1776158	5.37e-09	2.16e-10	-7.10539	13.1995	-1.08607	CDV3	CDV3 homolog
ILMN_2105983	4.87e-08	2.44e-09	-6.58801	10.8238	-1.08563	XRCC5	X-ray repair cross complementing 5
ILMN_1887618	1.6e-08	7.18e-10	-6.85046	12.0214	-1.08562
ILMN_1730101	3.52e-06	2.75e-07	-5.53299	6.20798	-1.08488	GSPT2	G1 to S phase transition 2
ILMN_1675656	1.62e-09	5.75e-11	-7.38388	14.501	-1.08392	PPFIBP2	PPFIA binding protein 2
ILMN_1808674	5.05e-05	5.35e-06	-4.82287	3.33442	-1.08343	CPN1	carboxypeptidase N subunit 1
ILMN_2407346	9.32e-09	3.95e-10	-6.9779	12.6086	-1.08275	LDHD	lactate dehydrogenase D
ILMN_1760748	1.36e-06	9.63e-08	-5.77419	7.23091	-1.08201	PBLD	phenazine biosynthesis like protein domain containing
ILMN_2056606	0.00567	0.00118	-3.34335	-1.80105	-1.08054	PPP1R1A	protein phosphatase 1 regulatory inhibitor subunit 1A
ILMN_1796461	0.00319	0.000594	-3.553	-1.15644	-1.08017	PRSS8	protease, serine 8
ILMN_1700546	1.03e-07	5.59e-09	-6.40757	10.0104	-1.07989	ELOVL6	ELOVL fatty acid elongase 6
ILMN_1685567	1.21e-08	5.25e-10	-6.91701	12.3276	-1.07979	TGDS	TDP-glucose 4,6-dehydratase
ILMN_1667670	6.39e-06	5.36e-07	-5.37775	5.56144	-1.0793	SLC25A15	solute carrier family 25 member 15
ILMN_1698144	2.27e-06	1.7e-07	-5.64451	6.67826	-1.07861	CFH	complement factor H
ILMN_1688423	5.24e-10	1.67e-11	-7.64161	15.7172	-1.07828	FCER1A	Fc fragment of IgE receptor Ia
ILMN_1686259	0.000242	3.06e-05	-4.37876	1.65891	-1.07723	PRODH2	proline dehydrogenase 2
ILMN_1661799	1.22e-06	8.59e-08	-5.8002	7.34246	-1.0767	HIGD1A	HIG1 hypoxia inducible domain family member 1A
ILMN_1753005	0.000718	0.000104	-4.04995	0.487953	-1.07473	RELN	reelin
ILMN_2066858	5.98e-13	8.97e-15	-9.18202	23.1362	-1.0747	TNFSF13B	tumor necrosis factor superfamily member 13b
ILMN_2254994	1.35e-08	5.94e-10	-6.89102	12.2079	-1.07469	NNT	nicotinamide nucleotide transhydrogenase
ILMN_1677237	1.76e-05	1.65e-06	-5.11046	4.4715	-1.07356
ILMN_1795257	0.000764	0.000112	-4.03066	0.421208	-1.07287	GPT	glutamic--pyruvic transaminase
ILMN_1669273	0.00022	2.75e-05	-4.40634	1.75993	-1.0726	PPT1	palmitoyl-protein thioesterase 1
ILMN_1727348	2.04e-10	5.9e-12	-7.85675	16.7398	-1.07177	NMD3	NMD3 ribosome export adaptor
ILMN_1666924	1.09e-12	1.78e-14	-9.04302	22.4605	-1.07153	PINK1	PTEN induced putative kinase 1
ILMN_1784523	0.000101	1.16e-05	-4.62967	2.59294	-1.07122	ATP6V1G1	ATPase H+ transporting V1 subunit G1
ILMN_1746763	2.97e-11	6.97e-13	-8.29582	18.8439	-1.0703	ECM2	extracellular matrix protein 2
ILMN_1708611	1.12e-05	1e-06	-5.23028	4.95629	-1.07013	RDX	radixin
ILMN_1760727	0.000129	1.52e-05	-4.55943	2.32811	-1.07004	ANG	angiogenin
ILMN_1690295	2.45e-10	7.22e-12	-7.81494	16.5406	-1.06978
ILMN_2170353	0.000471	6.46e-05	-4.18017	0.944205	-1.06969	HACD2	3-hydroxyacyl-CoA dehydratase 2
ILMN_1685258	0.000239	3.01e-05	-4.38284	1.67381	-1.06928	TMEM14B	transmembrane protein 14B
ILMN_1652955	1.29e-06	9.12e-08	-5.78653	7.28379	-1.06845
ILMN_1684158	0.000222	2.77e-05	-4.40442	1.75287	-1.06816	GPT2	glutamic--pyruvic transaminase 2
ILMN_1714592	2.54e-07	1.52e-08	-6.18725	9.0295	-1.06809	CDA	cytidine deaminase
ILMN_1744347	6.7e-07	4.45e-08	-5.94884	7.98453	-1.06696
ILMN_1688702	0.000377	5.04e-05	-4.24682	1.18156	-1.06686	PJA2	praja ring finger ubiquitin ligase 2
ILMN_1809384	0.000224	2.81e-05	-4.4013	1.74143	-1.06627	CYP4F12	cytochrome P450 family 4 subfamily F member 12
ILMN_1677385	1.85e-07	1.07e-08	-6.26502	9.37413	-1.06624	SMIM19	small integral membrane protein 19
ILMN_1708934	4.3e-06	3.44e-07	-5.4815	5.99247	-1.06533	ADM	adrenomedullin
ILMN_1754864	0.000624	8.91e-05	-4.0932	0.638375	-1.06505	SLC25A18	solute carrier family 25 member 18
ILMN_2093810	1.61e-05	1.5e-06	-5.13361	4.56464	-1.0647	POMP	proteasome maturation protein
ILMN_2219683	0.0247	0.00757	-2.72857	-3.50704	-1.06358	NEU4	neuraminidase 4
ILMN_1786278	3.33e-07	2.06e-08	-6.12086	8.73671	-1.06353	FAM149A	family with sequence similarity 149 member A
ILMN_1747716	0.000765	0.000112	-4.03016	0.419496	-1.06349	ALDOB	aldolase, fructose-bisphosphate B
ILMN_1738955	1.56e-09	5.52e-11	-7.39209	14.5396	-1.06342	ANAPC16	anaphase promoting complex subunit 16
ILMN_1742798	5.08e-07	3.26e-08	-6.01829	8.28704	-1.06327	TRA2B	transformer 2 beta homolog (Drosophila)
ILMN_1694240	3.96e-16	2.7e-18	-10.8286	31.1401	-1.06244	MAP2K1	mitogen-activated protein kinase kinase 1
ILMN_2206746	0.000506	7.02e-05	-4.15782	0.865188	-1.06221	BGN	biglycan
ILMN_1708833	0.00011	1.28e-05	-4.60443	2.4975	-1.06178	APCS	amyloid P component, serum
ILMN_2384241	3.35e-09	1.29e-10	-7.21469	13.7086	-1.06061	TGFBR2	transforming growth factor beta receptor 2
ILMN_2225537	0.00124	0.000196	-3.87432	-0.11116	-1.06048	PTGR1	prostaglandin reductase 1
ILMN_1796734	1.51e-05	1.39e-06	-5.15222	4.63973	-1.05966	SPARC	secreted protein acidic and cysteine rich
ILMN_1714384	2.05e-09	7.48e-11	-7.32852	14.2412	-1.059	PCCA	propionyl-CoA carboxylase alpha subunit
ILMN_2069224	3.14e-10	9.49e-12	-7.75852	16.2721	-1.05856	PVALB	parvalbumin
ILMN_2276952	8.85e-08	4.73e-09	-6.44401	10.174	-1.05843	TSC22D3	TSC22 domain family member 3
ILMN_1807101	2.26e-09	8.34e-11	-7.30579	14.1347	-1.05834	F11	coagulation factor XI
ILMN_1656242	0.00011	1.27e-05	-4.6055	2.50154	-1.0583	C1R	complement C1r subcomponent
ILMN_1693879	1.33e-16	7.87e-19	-11.081	32.3589	-1.05785	RANBP3L	RAN binding protein 3 like
ILMN_1680424	8.66e-13	1.36e-14	-9.0968	22.7219	-1.05772	CTSG	cathepsin G
ILMN_1670512	0.000104	1.19e-05	-4.62156	2.56224	-1.05567	PXMP2	peroxisomal membrane protein 2
ILMN_1750324	4.48e-06	3.6e-07	-5.47078	5.94774	-1.05534	IGFBP5	insulin like growth factor binding protein 5
ILMN_2208413	2.02e-11	4.55e-13	-8.38299	19.2639	-1.05484	ARHGAP15	Rho GTPase activating protein 15
ILMN_1701681	9.71e-05	1.1e-05	-4.64162	2.63827	-1.0528	SEC11C	SEC11 homolog C, signal peptidase complex subunit
ILMN_2097793	9.39e-09	3.98e-10	-6.97606	12.6001	-1.05279	ZBTB4	zinc finger and BTB domain containing 4
ILMN_1732534	4.17e-06	3.32e-07	-5.48992	6.02764	-1.05122	CHMP5	charged multivesicular body protein 5
ILMN_1722662	6.89e-08	3.57e-09	-6.50498	10.4485	-1.05103	RAD23B	RAD23 homolog B, nucleotide excision repair protein
ILMN_1761999	1.63e-09	5.81e-11	-7.38153	14.49	-1.04923	C1orf168	chromosome 1 open reading frame 168
ILMN_1668063	1.13e-07	6.16e-09	-6.38625	9.9149	-1.04819	FCN1	ficolin 1
ILMN_1677466	1.91e-09	6.96e-11	-7.34385	14.3131	-1.04676	DUSP6	dual specificity phosphatase 6
ILMN_2210837	3.91e-05	4e-06	-4.89458	3.61431	-1.04658	CDC26	cell division cycle 26
ILMN_1671891	1.5e-06	1.07e-07	-5.74948	7.12509	-1.04511	PID1	phosphotyrosine interaction domain containing 1
ILMN_2215194	4.04e-14	4.61e-16	-9.78376	26.0657	-1.04478	GCLC	glutamate-cysteine ligase catalytic subunit
ILMN_1713756	2.45e-07	1.47e-08	-6.19575	9.06708	-1.04477	GLUD1	glutamate dehydrogenase 1
ILMN_2387553	2.82e-06	2.15e-07	-5.58993	6.4475	-1.04266	PSMA3	proteasome subunit alpha 3
ILMN_1653794	9.09e-07	6.22e-08	-5.87302	7.65605	-1.04095	SNHG5	small nucleolar RNA host gene 5
ILMN_1661650	3.38e-07	2.1e-08	-6.11677	8.7187	-1.03879	PPP4R3B	protein phosphatase 4 regulatory subunit 3B
ILMN_2282641	6.92e-09	2.85e-10	-7.04657	12.9264	-1.03791	TBXAS1	thromboxane A synthase 1
ILMN_1791123	6.17e-05	6.68e-06	-4.76759	3.12035	-1.03672	TMPRSS2	transmembrane protease, serine 2
ILMN_1679483	7.21e-08	3.75e-09	-6.49442	10.4009	-1.03636	INTS10	integrator complex subunit 10
ILMN_1702487	4.3e-06	3.43e-07	-5.48173	5.99343	-1.03591	SGK1	serum/glucocorticoid regulated kinase 1
ILMN_1695891	2.95e-07	1.8e-08	-6.15021	8.86596	-1.03441
ILMN_1742073	8.96e-07	6.12e-08	-5.8767	7.67198	-1.03436	ADCY1	adenylate cyclase 1
ILMN_1651958	0.000942	0.000142	-3.96413	0.19284	-1.03392	MGP	matrix Gla protein
ILMN_1760414	0.00157	0.000258	-3.79651	-0.370437	-1.03388	AADAC	arylacetamide deacetylase
ILMN_1758049	4.23e-06	3.37e-07	-5.48606	6.01154	-1.03373	NFIA	nuclear factor I A
ILMN_1794392	1.11e-07	6.07e-09	-6.38954	9.92962	-1.03364	DDX3X	DEAD-box helicase 3, X-linked
ILMN_1718136	0.00046	6.29e-05	-4.18751	0.970213	-1.03268	UQCRHL	ubiquinol-cytochrome c reductase hinge protein like
ILMN_1740764	1.19e-17	5.48e-20	-11.6288	34.9902	-1.03224	CHD3	chromodomain helicase DNA binding protein 3
ILMN_1734696	3.89e-11	9.41e-13	-8.23425	18.5477	-1.03215	FRG1	FSHD region gene 1
ILMN_1745356	0.00377	0.000727	-3.49265	-1.34511	-1.03161	CXCL9	C-X-C motif chemokine ligand 9
ILMN_2085012	7.29e-09	3.02e-10	-7.03473	12.8716	-1.02959	TMEM176B	transmembrane protein 176B
ILMN_1660439	1.96e-13	2.65e-15	-9.4291	24.3387	-1.0288
ILMN_1801307	0.000247	3.13e-05	-4.37254	1.6362	-1.02845	TNFSF10	tumor necrosis factor superfamily member 10
ILMN_1782788	8.03e-06	6.9e-07	-5.31812	5.31565	-1.028	YBX3	Y-box binding protein 3
ILMN_2203271	1.27e-11	2.72e-13	-8.48826	19.7719	-1.02789	FPR3	formyl peptide receptor 3
ILMN_1692517	3.28e-05	3.28e-06	-4.94325	3.80567	-1.02756
ILMN_1771308	0.000302	3.95e-05	-4.31143	1.4141	-1.02725	BAAT	bile acid-CoA:amino acid N-acyltransferase
ILMN_1738356	3.4e-05	3.43e-06	-4.93279	3.76443	-1.02708
ILMN_1678671	1.13e-07	6.22e-09	-6.38445	9.90685	-1.02524	KLHL24	kelch like family member 24
ILMN_2341724	2.38e-26	2.27e-29	-16.3265	56.2779	-1.02516
ILMN_1800659	1.11e-08	4.78e-10	-6.93715	12.4205	-1.02477	PGM1	phosphoglucomutase 1
ILMN_1772821	1.49e-07	8.43e-09	-6.31775	9.60884	-1.02474
ILMN_1777061	7.66e-11	1.99e-12	-8.08021	17.8081	-1.02396	ZSWIM6	zinc finger SWIM-type containing 6
ILMN_1709795	1.21e-06	8.5e-08	-5.80249	7.35228	-1.02357	RAC2	ras-related C3 botulinum toxin substrate 2 (rho family, small GTP binding protein Rac2)
ILMN_1785265	1.9e-06	1.4e-07	-5.6895	6.86927	-1.02281	PLS3	plastin 3
ILMN_1708841	0.00117	0.000182	-3.89516	-0.041056	-1.02259	GOLPH3	golgi phosphoprotein 3
ILMN_1768176	5.85e-07	3.81e-08	-5.9834	8.13486	-1.02178	PBDC1	polysaccharide biosynthesis domain containing 1
ILMN_1686989	0.000531	7.42e-05	-4.14297	0.812842	-1.01916	INSIG1	insulin induced gene 1
ILMN_1716276	4e-07	2.52e-08	-6.07605	8.53984	-1.01826	CCL4L1	C-C motif chemokine ligand 4 like 1
ILMN_2109197	2.19e-09	8.07e-11	-7.31262	14.1667	-1.01782	EPB41L3	erythrocyte membrane protein band 4.1 like 3
ILMN_1760174	5.57e-08	2.82e-09	-6.55597	10.6787	-1.01671	MCCC1	methylcrotonoyl-CoA carboxylase 1
ILMN_1717639	8.89e-06	7.72e-07	-5.29165	5.20702	-1.01649	SIK1	salt inducible kinase 1
ILMN_1769810	1.91e-05	1.81e-06	-5.08823	4.38223	-1.01427	ARL6IP5	ADP ribosylation factor like GTPase 6 interacting protein 5
ILMN_1802699	4.27e-06	3.41e-07	-5.48372	6.00176	-1.0133	PCK2	phosphoenolpyruvate carboxykinase 2, mitochondrial
ILMN_2193233	0.000656	9.43e-05	-4.07766	0.584193	-1.01316	MZB1	marginal zone B and B1 cell specific protein
ILMN_2363586	0.00157	0.000259	-3.79526	-0.374568	-1.01225	SDCBP	syndecan binding protein
ILMN_1702973	8.89e-08	4.75e-09	-6.44294	10.1692	-1.01163	EVA1A	eva-1 homolog A, regulator of programmed cell death
ILMN_1698019	2.14e-07	1.26e-08	-6.22902	9.21437	-1.01139	LGMN	legumain
ILMN_2186482	4.38e-05	4.55e-06	-4.86277	3.48985	-1.0113	TMED7	transmembrane p24 trafficking protein 7
ILMN_1755115	1.53e-08	6.8e-10	-6.86217	12.0752	-1.01093	RPL23	ribosomal protein L23
ILMN_1720158	2.04e-06	1.51e-07	-5.67164	6.79333	-1.01051	ETS2	ETS proto-oncogene 2, transcription factor
ILMN_1711919	2.21e-07	1.31e-08	-6.22089	9.17836	-1.01048	SCYL2	SCY1 like pseudokinase 2
ILMN_1781207	6.75e-17	3.75e-19	-11.2331	33.0915	-1.01012	FYN	FYN proto-oncogene, Src family tyrosine kinase
ILMN_1731194	4.36e-06	3.49e-07	-5.47832	5.97921	-1.00836	STRAP	serine/threonine kinase receptor associated protein
ILMN_1685480	6.88e-07	4.58e-08	-5.942	7.95481	-1.00831	TARS	threonyl-tRNA synthetase
ILMN_1756311	3.68e-08	1.79e-09	-6.65496	11.1277	-1.00804	UFSP2	UFM1 specific peptidase 2
ILMN_1699253	1.62e-05	1.51e-06	-5.13223	4.55912	-1.00712
ILMN_1677885	5.75e-06	4.74e-07	-5.40652	5.68053	-1.00552	FMO4	flavin containing monooxygenase 4
ILMN_1683447	9.16e-05	1.03e-05	-4.65814	2.70104	-1.00542
ILMN_1770127	1.98e-05	1.88e-06	-5.07843	4.34295	-1.00277	DNAJA2	DnaJ heat shock protein family (Hsp40) member A2
ILMN_1651336	4.1e-09	1.61e-10	-7.16699	13.4861	-1.00232	MLYCD	malonyl-CoA decarboxylase
ILMN_2284744	1.92e-10	5.51e-12	-7.87089	16.8073	-1.0006	HNMT	histamine N-methyltransferase
ILMN_1688642	9.36e-05	1.06e-05	-4.65212	2.67814	-0.999596	LAMC3	laminin subunit gamma 3
ILMN_2041222	3.12e-05	3.1e-06	-4.95699	3.85989	-0.999569
ILMN_1663032	3.89e-08	1.9e-09	-6.64176	11.0677	-0.999393	FNDC4	fibronectin type III domain containing 4
ILMN_1781290	0.000823	0.000122	-4.00719	0.340358	-0.997954	RHOA	ras homolog family member A
ILMN_1779448	0.00215	0.000373	-3.69026	-0.718189	-0.997653	EFHD1	EF-hand domain family member D1
ILMN_1724437	0.000126	1.49e-05	-4.56572	2.35171	-0.996976	GCAT	glycine C-acetyltransferase
ILMN_1802257	7.63e-12	1.53e-13	-8.60577	20.3399	-0.996433	PCTP	phosphatidylcholine transfer protein
ILMN_2193936	0.00231	0.000408	-3.66404	-0.802851	-0.991554	HRG	histidine rich glycoprotein
ILMN_1803953	2.17e-05	2.09e-06	-5.05325	4.24226	-0.990426	LINC00493	long intergenic non-protein coding RNA 493
ILMN_1672366	6.27e-06	5.24e-07	-5.38302	5.58321	-0.990199	PIGY	phosphatidylinositol glycan anchor biosynthesis class Y
ILMN_1659285	3.17e-07	1.95e-08	-6.13298	8.79007	-0.989569	PSMG1	proteasome assembly chaperone 1
ILMN_1710873	1.17e-15	9.07e-18	-10.5817	29.9447	-0.988808	ZNF330	zinc finger protein 330
ILMN_2098126	0.000543	7.59e-05	-4.13665	0.790595	-0.986897	CCL5	C-C motif chemokine ligand 5
ILMN_1764629	1.58e-08	7.04e-10	-6.85461	12.0405	-0.986388	SLC39A14	solute carrier family 39 member 14
ILMN_1788783	1.11e-08	4.78e-10	-6.93704	12.42	-0.985813	TRAM2	translocation associated membrane protein 2
ILMN_2204876	1.32e-06	9.36e-08	-5.78066	7.25862	-0.985713	FLVCR2	feline leukemia virus subgroup C cellular receptor family member 2
ILMN_2163306	0.000594	8.41e-05	-4.10896	0.693447	-0.984925	FAM120A	family with sequence similarity 120A
ILMN_2114972	3.9e-06	3.08e-07	-5.5074	6.10077	-0.984774	FGB	fibrinogen beta chain
ILMN_1752591	6.5e-07	4.31e-08	-5.95594	8.01538	-0.984648	LEPROTL1	leptin receptor overlapping transcript-like 1
ILMN_1685538	3.11e-05	3.09e-06	-4.95774	3.86287	-0.984312
ILMN_2064926	1.28e-07	7.11e-09	-6.35509	9.77549	-0.983715	ITFG1	integrin alpha FG-GAP repeat containing 1
ILMN_2176955	5.97e-06	4.96e-07	-5.39595	5.63671	-0.981297	CUL5	cullin 5
ILMN_1791890	1.1e-08	4.74e-10	-6.93913	12.4296	-0.979702	SPON1	spondin 1
ILMN_1703538	3.57e-07	2.22e-08	-6.10346	8.66018	-0.978968	AIF1	allograft inflammatory factor 1
ILMN_1758474	6.35e-11	1.62e-12	-8.1231	18.0138	-0.978552	PRKRA	protein activator of interferon induced protein kinase EIF2AK2
ILMN_1877248	1.77e-06	1.3e-07	-5.70611	6.94001	-0.977559
ILMN_1799725	1.96e-06	1.45e-07	-5.68128	6.83433	-0.975187	DOCK2	dedicator of cytokinesis 2
ILMN_2413084	0.000323	4.25e-05	-4.29183	1.34329	-0.974526	HSPA8	heat shock protein family A (Hsp70) member 8
ILMN_1681983	5.01e-22	1.1e-24	-13.9121	45.6617	-0.974263	RSPO3	R-spondin 3
ILMN_2100357	7.58e-06	6.48e-07	-5.33299	5.37681	-0.97392	SMPDL3A	sphingomyelin phosphodiesterase acid like 3A
ILMN_1767068	2.3e-09	8.51e-11	-7.30159	14.115	-0.973718	SMAD6	SMAD family member 6
ILMN_1738921	5.33e-07	3.44e-08	-6.00644	8.23532	-0.972781	ACAA1	acetyl-CoA acyltransferase 1
ILMN_1875223	7.71e-06	6.6e-07	-5.32887	5.35983	-0.972734
ILMN_1814573	5.52e-11	1.38e-12	-8.15632	18.1733	-0.971193	CMTR2	cap methyltransferase 2
ILMN_2110167	8.89e-09	3.74e-10	-6.98929	12.6613	-0.97076	POLR1E	RNA polymerase I subunit E
ILMN_1670302	7.19e-11	1.85e-12	-8.09564	17.8821	-0.96928	HK3	hexokinase 3
ILMN_2103720	4.21e-06	3.35e-07	-5.48735	6.01692	-0.969184	MRPL15	mitochondrial ribosomal protein L15
ILMN_1660890	1.06e-07	5.77e-09	-6.40074	9.97983	-0.968795	ACADL	acyl-CoA dehydrogenase, long chain
ILMN_2189993	4.02e-05	4.13e-06	-4.8868	3.58381	-0.96826	MRPS35	mitochondrial ribosomal protein S35
ILMN_1675669	5.61e-05	6.02e-06	-4.79352	3.22059	-0.967768	IBTK	inhibitor of Bruton tyrosine kinase
ILMN_1704537	0.00067	9.64e-05	-4.07158	0.563052	-0.967415	PHGDH	phosphoglycerate dehydrogenase
ILMN_1779228	0.000582	8.22e-05	-4.11489	0.714233	-0.966662	CDH2	cadherin 2
ILMN_1657373	5.14e-09	2.06e-10	-7.11553	13.2466	-0.96492	P3H2	prolyl 3-hydroxylase 2
ILMN_1692824	8.6e-15	8.05e-17	-10.1377	27.7884	-0.963588	ASPA	aspartoacylase
ILMN_2367215	1.57e-11	3.48e-13	-8.43794	19.529	-0.963307	PRCP	prolylcarboxypeptidase
ILMN_1798841	9.95e-19	3.87e-21	-12.1787	37.6076	-0.962952	PLCXD3	phosphatidylinositol specific phospholipase C X domain containing 3
ILMN_1791332	7.68e-06	6.57e-07	-5.32986	5.3639	-0.962906	ATP5O	ATP synthase, H+ transporting, mitochondrial F1 complex, O subunit
ILMN_1786532	4.81e-05	5.07e-06	-4.83631	3.3867	-0.961672	CNIH1	cornichon family AMPA receptor auxiliary protein 1
ILMN_1745963	1.01e-06	7.01e-08	-5.84628	7.54068	-0.96153	FOLR2	folate receptor beta
ILMN_2070521	0.000168	2.03e-05	-4.48485	2.04975	-0.96113	BHMT2	betaine--homocysteine S-methyltransferase 2
ILMN_2400759	0.000338	4.47e-05	-4.27862	1.2957	-0.95878	CPVL	carboxypeptidase, vitellogenic like
ILMN_1667692	2.72e-08	1.29e-09	-6.72567	11.4499	-0.95796	PTGIS	prostaglandin I2 (prostacyclin) synthase
ILMN_1788384	4.18e-05	4.32e-06	-4.87566	3.54023	-0.957804	TMEM245	transmembrane protein 245
ILMN_1813400	2.26e-09	8.34e-11	-7.30593	14.1353	-0.957788	CBR4	carbonyl reductase 4
ILMN_1785324	7.91e-05	8.78e-06	-4.69908	2.85717	-0.957679	MTHFD1	methylenetetrahydrofolate dehydrogenase, cyclohydrolase and formyltetrahydrofolate synthetase 1
ILMN_1713162	0.0713	0.0325	-2.16976	-4.79809	-0.95741	GSTM2	glutathione S-transferase mu 2 (muscle)
ILMN_1678965	5.67e-13	8.43e-15	-9.19452	23.1971	-0.956047	FABP1	fatty acid binding protein 1
ILMN_1751868	2.77e-14	3.04e-16	-9.86811	26.4763	-0.955538	TCTEX1D1	Tctex1 domain containing 1
ILMN_1725594	5.71e-10	1.83e-11	-7.62225	15.6255	-0.954745	FAM188A	family with sequence similarity 188 member A
ILMN_1729868	4.44e-05	4.62e-06	-4.85911	3.47556	-0.954315	SPRYD4	SPRY domain containing 4
ILMN_1738736	2.08e-05	1.99e-06	-5.06536	4.29064	-0.953427	SNX4	sorting nexin 4
ILMN_1679809	9.28e-07	6.37e-08	-5.86789	7.63393	-0.952947	GSTP1	glutathione S-transferase pi 1
ILMN_1800602	1.26e-05	1.14e-06	-5.19972	4.83205	-0.952947	GCA	grancalcin
ILMN_1814719	0.000105	1.2e-05	-4.62011	2.55677	-0.952708	RBP4	retinol binding protein 4
ILMN_1688698	7.12e-23	1.36e-25	-14.3682	47.7239	-0.952594	ZEB2	zinc finger E-box binding homeobox 2
ILMN_2062112	1.42e-06	1.01e-07	-5.76269	7.18164	-0.952212	ZC3H15	zinc finger CCCH-type containing 15
ILMN_1682312	1.51e-11	3.31e-13	-8.448	19.5775	-0.952096	CYBB	cytochrome b-245 beta chain
ILMN_1720322	5.06e-10	1.61e-11	-7.64921	15.7532	-0.951638	PTS	6-pyruvoyltetrahydropterin synthase
ILMN_1892782	1.38e-17	6.41e-20	-11.5965	34.8358	-0.950699	CD1D	CD1d molecule
ILMN_1762993	1.67e-07	9.57e-09	-6.2899	9.48477	-0.950659	PIGV	phosphatidylinositol glycan anchor biosynthesis class V
ILMN_1716353	1.19e-10	3.25e-12	-7.97962	17.3266	-0.949188
ILMN_2065773	2.74e-06	2.08e-07	-5.59741	6.47908	-0.948726	SCG5	secretogranin V
ILMN_1786972	5.09e-09	2.03e-10	-7.1182	13.259	-0.948082	SARS	seryl-tRNA synthetase
ILMN_1745501	6.04e-07	3.95e-08	-5.97539	8.10001	-0.947474	DNALI1	dynein axonemal light intermediate chain 1
ILMN_1693882	3.36e-17	1.71e-19	-11.3947	33.8684	-0.946849	TAPT1	transmembrane anterior posterior transformation 1
ILMN_1780898	2.49e-08	1.16e-09	-6.747	11.5473	-0.946673	PRKCH	protein kinase C eta
ILMN_1706521	6.4e-07	4.22e-08	-5.9604	8.03479	-0.946506	CSNK1G2	casein kinase 1 gamma 2
ILMN_1702698	5.04e-06	4.1e-07	-5.44037	5.82109	-0.945724	LSM11	LSM11, U7 small nuclear RNA associated
ILMN_1737541	0.00027	3.47e-05	-4.34532	1.53699	-0.94541	HGD	homogentisate 1,2-dioxygenase
ILMN_1814230	1.35e-06	9.58e-08	-5.77541	7.23612	-0.943811
ILMN_1708881	6.24e-14	7.48e-16	-9.68562	25.5878	-0.943146	RAB20	RAB20, member RAS oncogene family
ILMN_1706498	4.15e-19	1.48e-21	-12.3792	38.5553	-0.94242	DSE	dermatan sulfate epimerase
ILMN_1685703	7.96e-06	6.84e-07	-5.32036	5.32487	-0.941482	ACOX2	acyl-CoA oxidase 2
ILMN_1807825	8.96e-09	3.78e-10	-6.98716	12.6514	-0.941085	LY86	lymphocyte antigen 86
ILMN_1703886	6.96e-07	4.64e-08	-5.93903	7.9419	-0.940646	SLC16A2	solute carrier family 16 member 2
ILMN_1802519	1.91e-07	1.11e-08	-6.25686	9.33791	-0.940492	VPS36	vacuolar protein sorting 36 homolog
ILMN_1669362	8.58e-11	2.27e-12	-8.05399	17.6825	-0.939961	IGFBP6	insulin like growth factor binding protein 6
ILMN_1778756	6.23e-07	4.1e-08	-5.96721	8.06439	-0.939956	SULT1A1	sulfotransferase family 1A member 1
ILMN_1789074	0.00196	0.000336	-3.72005	-0.621409	-0.938298	HSPA1A	heat shock protein family A (Hsp70) member 1A
ILMN_1733863	3.32e-08	1.6e-09	-6.67919	11.238	-0.936071	UBALD1	UBA like domain containing 1
ILMN_1656292	1.76e-09	6.34e-11	-7.36337	14.4047	-0.935617
ILMN_1775708	5.19e-06	4.24e-07	-5.43257	5.78866	-0.93555	SLC2A3	solute carrier family 2 member 3
ILMN_1809639	2.18e-25	2.54e-28	-15.7715	53.9041	-0.935322	TMEM26	transmembrane protein 26
ILMN_2215418	0.00137	0.00022	-3.84209	-0.219012	-0.935072	SERPINA6	serpin family A member 6
ILMN_1744147	3.41e-05	3.44e-06	-4.93162	3.75983	-0.934756	CEBPZ	CCAAT/enhancer binding protein zeta
ILMN_1903159	3.27e-06	2.53e-07	-5.55234	6.28927	-0.934711	PPM1A	protein phosphatase, Mg2+/Mn2+ dependent 1A
ILMN_1782050	1.36e-08	5.97e-10	-6.88997	12.2031	-0.93424	CEBPD	CCAAT/enhancer binding protein delta
ILMN_1662419	6.43e-09	2.63e-10	-7.06372	13.006	-0.933897	COX7A1	cytochrome c oxidase subunit 7A1
ILMN_1797372	1.48e-06	1.06e-07	-5.7523	7.13716	-0.933492	C3orf58	chromosome 3 open reading frame 58
ILMN_1699354	4.05e-10	1.25e-11	-7.70093	15.9986	-0.932176	EPHA2	EPH receptor A2
ILMN_1732831	1.14e-05	1.02e-06	-5.22618	4.93961	-0.930062	CHST7	carbohydrate sulfotransferase 7
ILMN_1805003	0.00246	0.000438	-3.64301	-0.870448	-0.929671	UGT2B4	UDP glucuronosyltransferase family 2 member B4
ILMN_1758315	2.37e-08	1.1e-09	-6.75834	11.5992	-0.929406	SLC9A9	solute carrier family 9 member A9
ILMN_1674650	9e-10	3.04e-11	-7.5165	15.1255	-0.928566	NMRK1	nicotinamide riboside kinase 1
ILMN_2113490	5.38e-17	2.83e-19	-11.2906	33.3683	-0.928445	NTN4	netrin 4
ILMN_1727762	1.96e-11	4.38e-13	-8.39055	19.3004	-0.928115	CASP1	caspase 1
ILMN_1758938	2.21e-07	1.31e-08	-6.22068	9.17741	-0.928114	SLC31A2	solute carrier family 31 member 2
ILMN_1676792	4.59e-09	1.81e-10	-7.1424	13.3716	-0.92767
ILMN_2150352	1.95e-07	1.14e-08	-6.25189	9.31583	-0.927413	CBWD5	COBW domain containing 5
ILMN_1755251	7.02e-05	7.68e-06	-4.73278	2.98632	-0.927113	ITIH1	inter-alpha-trypsin inhibitor heavy chain 1
ILMN_1676846	1.6e-05	1.48e-06	-5.1367	4.5771	-0.926815	ABCE1	ATP binding cassette subfamily E member 1
ILMN_1764166	2.8e-13	3.92e-15	-9.34977	23.9525	-0.926782	BCKDHB	branched chain keto acid dehydrogenase E1 subunit beta
ILMN_2042651	1.54e-08	6.88e-10	-6.85962	12.0635	-0.925554	EVI2B	ecotropic viral integration site 2B
ILMN_1652313	3.83e-08	1.87e-09	-6.64543	11.0844	-0.924659	RNF215	ring finger protein 215
ILMN_1747197	1.67e-08	7.55e-10	-6.83957	11.9714	-0.924425	SLC41A2	solute carrier family 41 member 2
ILMN_1715301	0.00693	0.00151	-3.26647	-2.02972	-0.923339	FXYD2	FXYD domain containing ion transport regulator 2
ILMN_1763852	0.000291	3.77e-05	-4.32361	1.45819	-0.923278	ACACB	acetyl-CoA carboxylase beta
ILMN_1803429	4.76e-06	3.86e-07	-5.45482	5.88121	-0.921638	CD44	CD44 molecule (Indian blood group)
ILMN_1774617	3.48e-07	2.16e-08	-6.10969	8.68757	-0.921332	NAB1	NGFI-A binding protein 1
ILMN_1730998	1.2e-07	6.61e-09	-6.37092	9.84627	-0.9208	TSPAN6	tetraspanin 6
ILMN_2280548	1.23e-15	9.58e-18	-10.5707	29.8914	-0.920496	FYB	FYN binding protein
ILMN_1671731	2.06e-05	1.97e-06	-5.06767	4.29988	-0.920018	AVPI1	arginine vasopressin induced 1
ILMN_1803647	9.71e-12	2e-13	-8.55101	20.0751	-0.920001	FAM162A	family with sequence similarity 162 member A
ILMN_1819783	1.01e-13	1.28e-15	-9.57753	25.0614	-0.919168	FNIP2	folliculin interacting protein 2
ILMN_2394296	9.38e-06	8.21e-07	-5.27716	5.14769	-0.918689	SAR1B	secretion associated Ras related GTPase 1B
ILMN_1720745	0.00219	0.000383	-3.68246	-0.743424	-0.918625
ILMN_1798354	0.00131	0.000209	-3.8563	-0.171543	-0.918068	PAPOLA	poly(A) polymerase alpha
ILMN_1712357	2.87e-07	1.74e-08	-6.15802	8.90043	-0.917944	HNRNPK	heterogeneous nuclear ribonucleoprotein K
ILMN_1770940	8.81e-05	9.9e-06	-4.66876	2.74146	-0.917169	CDH1	cadherin 1
ILMN_1785202	1.28e-09	4.44e-11	-7.43772	14.7542	-0.916473	STAT4	signal transducer and activator of transcription 4
ILMN_1740759	1.47e-05	1.35e-06	-5.15872	4.66599	-0.915646	MAMDC4	MAM domain containing 4
ILMN_1702696	4.7e-06	3.8e-07	-5.45813	5.89502	-0.915054
ILMN_2325763	0.00251	0.000449	-3.63603	-0.892843	-0.914888	VCAM1	vascular cell adhesion molecule 1
ILMN_1752574	8.7e-05	9.76e-06	-4.67231	2.75496	-0.914797	LEAP2	liver enriched antimicrobial peptide 2
ILMN_1844593	5.48e-07	3.54e-08	-5.99959	8.20546	-0.914638	NRG1	neuregulin 1
ILMN_1678968	3.1e-11	7.29e-13	-8.28652	18.7992	-0.914188	GEM	GTP binding protein overexpressed in skeletal muscle
ILMN_1792078	0.000147	1.77e-05	-4.52131	2.18545	-0.914064	RNF114	ring finger protein 114
ILMN_1757845	0.000358	4.76e-05	-4.26205	1.23615	-0.913877	SPIRE1	spire type actin nucleation factor 1
ILMN_1666733	0.0379	0.0134	-2.52006	-4.01902	-0.913779	CXCL8	C-X-C motif chemokine ligand 8
ILMN_1783060	3.33e-12	6.08e-14	-8.79314	21.2474	-0.913166
ILMN_1700047	2.86e-09	1.08e-10	-7.2518	13.882	-0.910715	ALAS1	5'-aminolevulinate synthase 1
ILMN_1729180	0.00522	0.00107	-3.3747	-1.70661	-0.910051	GATM	glycine amidinotransferase
ILMN_1757036	6.02e-05	6.51e-06	-4.77404	3.14526	-0.909857	AQP12A	aquaporin 12A
ILMN_1775743	9.14e-06	7.96e-07	-5.2843	5.1769	-0.909491	BTG1	BTG anti-proliferation factor 1
ILMN_2353732	0.000147	1.77e-05	-4.52139	2.18576	-0.90925	CD8A	CD8a molecule
ILMN_1652357	0.00017	2.07e-05	-4.48057	2.03383	-0.908744	PDHX	pyruvate dehydrogenase complex component X
ILMN_1666536	0.000259	3.31e-05	-4.35829	1.58419	-0.908534	VSIG2	V-set and immunoglobulin domain containing 2
ILMN_1659075	7.28e-06	6.2e-07	-5.34348	5.41997	-0.908519	HLA-DOA	major histocompatibility complex, class II, DO alpha
ILMN_2376258	2.91e-07	1.77e-08	-6.15419	8.8835	-0.908416	SMARCA1	SWI/SNF related, matrix associated, actin dependent regulator of chromatin, subfamily a, member 1
ILMN_2067708	0.000571	8.04e-05	-4.12114	0.736132	-0.908321	TFB2M	transcription factor B2, mitochondrial
ILMN_1735124	0.00039	5.23e-05	-4.23664	1.14513	-0.90743	OXT	oxytocin/neurophysin I prepropeptide
ILMN_1723912	0.000631	9e-05	-4.09024	0.628046	-0.907234	IFI44L	interferon induced protein 44 like
ILMN_2283398	3.48e-07	2.16e-08	-6.11001	8.68896	-0.907017	DUSP4	dual specificity phosphatase 4
ILMN_1728132	4.14e-09	1.63e-10	-7.16479	13.4759	-0.906974	LDHB	lactate dehydrogenase B
ILMN_1677697	1.04e-07	5.64e-09	-6.40584	10.0027	-0.906228
ILMN_1691466	1.1e-06	7.62e-08	-5.82719	7.45846	-0.90569	YES1	YES proto-oncogene 1, Src family tyrosine kinase
ILMN_1799128	5.73e-06	4.73e-07	-5.40714	5.68308	-0.904154	SLC30A9	solute carrier family 30 member 9
ILMN_1678700	3.34e-07	2.07e-08	-6.11999	8.73285	-0.903752
ILMN_1771987	6.7e-07	4.45e-08	-5.94856	7.98332	-0.903154	SLC44A2	solute carrier family 44 member 2
ILMN_2180682	0.00129	0.000206	-3.86031	-0.158103	-0.902907	MTPN	myotrophin
ILMN_1670719	1.61e-07	9.21e-09	-6.29836	9.52244	-0.902904	TPD52L1	tumor protein D52-like 1
ILMN_1761199	0.000138	1.63e-05	-4.54118	2.25971	-0.902502	SLCO2B1	solute carrier organic anion transporter family member 2B1
ILMN_1806023	2.63e-06	2e-07	-5.60708	6.51991	-0.902411	JUN	Jun proto-oncogene, AP-1 transcription factor subunit
ILMN_2098437	2.97e-12	5.36e-14	-8.81893	21.3725	-0.901984	ST13P4	suppression of tumorigenicity 13 (colon carcinoma) (Hsp70 interacting protein) pseudogene 4
ILMN_1709796	0.00369	0.000707	-3.50111	-1.31881	-0.900773	AGXT	alanine-glyoxylate aminotransferase
ILMN_2315208	3.96e-11	9.59e-13	-8.23031	18.5287	-0.90053	CAMK2B	calcium/calmodulin dependent protein kinase II beta
ILMN_1724881	7.84e-15	7.2e-17	-10.1605	27.899	-0.900041
ILMN_1795055	1.02e-13	1.29e-15	-9.57495	25.0488	-0.899556	LRRC3	leucine rich repeat containing 3
ILMN_1668880	0.00109	0.000168	-3.91772	0.035129	-0.898952	AKR1C4	aldo-keto reductase family 1, member C4
ILMN_2169839	9.83e-06	8.64e-07	-5.2651	5.09837	-0.898914	CNBP	CCHC-type zinc finger nucleic acid binding protein
ILMN_1744604	0.00285	0.00052	-3.5926	-1.03129	-0.898211	CYBA	cytochrome b-245 alpha chain
ILMN_1768050	5.11e-05	5.43e-06	-4.81936	3.32077	-0.896689	SCOC	short coiled-coil protein
ILMN_2053829	5.15e-12	9.78e-14	-8.69666	20.7799	-0.896443	CBLN3	cerebellin 3 precursor
ILMN_2150258	4.19e-06	3.33e-07	-5.48874	6.0227	-0.896047	ZFP36L2	ZFP36 ring finger protein like 2
ILMN_1786242	0.000611	8.69e-05	-4.09994	0.6619	-0.894376
ILMN_1768396	1.74e-06	1.27e-07	-5.71075	6.95979	-0.894207	AURKAIP1	aurora kinase A interacting protein 1
ILMN_1683597	0.00118	0.000184	-3.89152	-0.053326	-0.893949
ILMN_1795715	1.6e-09	5.68e-11	-7.38615	14.5117	-0.893719	DPYD	dihydropyrimidine dehydrogenase
ILMN_1766221	1.01e-08	4.32e-10	-6.95884	12.5206	-0.893425	B4GALT1	beta-1,4-galactosyltransferase 1
ILMN_1762003	9.23e-10	3.13e-11	-7.51081	15.0987	-0.892637	SEC62	SEC62 homolog, preprotein translocation factor
ILMN_1709408	0.00468	0.000939	-3.41485	-1.58464	-0.891325	MASP2	mannan binding lectin serine peptidase 2
ILMN_2049417	0.000501	6.94e-05	-4.16091	0.876077	-0.890859	TMEM86B	transmembrane protein 86B
ILMN_1675706	0.0314	0.0104	-2.61317	-3.79475	-0.890645	APOA4	apolipoprotein A4
ILMN_1777344	2.16e-05	2.08e-06	-5.05456	4.24746	-0.889713	RPS13	ribosomal protein S13
ILMN_1677440	0.000579	8.18e-05	-4.11637	0.719424	-0.889426	ATP6AP2	ATPase H+ transporting accessory protein 2
ILMN_1653134	8.27e-09	3.46e-10	-7.00595	12.7383	-0.888905	CNEP1R1	CTD nuclear envelope phosphatase 1 regulatory subunit 1
ILMN_1759622	1.22e-07	6.76e-09	-6.36608	9.82463	-0.886935	G3BP2	G3BP stress granule assembly factor 2
ILMN_1743797	0.000165	2e-05	-4.48889	2.06474	-0.886827
ILMN_1753111	0.000199	2.46e-05	-4.43547	1.86705	-0.886296	NAMPT	nicotinamide phosphoribosyltransferase
ILMN_1782419	3.54e-05	3.6e-06	-4.92085	3.71747	-0.886106	GNG11	G protein subunit gamma 11
ILMN_1706344	2.74e-08	1.3e-09	-6.72398	11.4422	-0.885766	ABHD6	abhydrolase domain containing 6
ILMN_2143220	0.00126	0.000199	-3.86993	-0.125894	-0.883699	ANGPTL3	angiopoietin like 3
ILMN_1737152	0.000251	3.19e-05	-4.36733	1.61719	-0.882938	DAO	D-amino acid oxidase
ILMN_1671928	4.67e-08	2.33e-09	-6.59737	10.8662	-0.882804	PROS1	protein S (alpha)
ILMN_1707649	4.13e-05	4.26e-06	-4.87944	3.55501	-0.882604	MPDZ	multiple PDZ domain crumbs cell polarity complex component
ILMN_1721283	1.05e-06	7.25e-08	-5.83866	7.50786	-0.882364	HSPB6	heat shock protein family B (small) member 6
ILMN_1722716	4.21e-10	1.31e-11	-7.69173	15.9549	-0.882297	SLC17A1	solute carrier family 17 member 1
ILMN_1788347	7.7e-12	1.55e-13	-8.6031	20.327	-0.881708	CIPC	CLOCK interacting pacemaker
ILMN_1731206	3.6e-05	3.65e-06	-4.91702	3.70239	-0.881066	NKD2	naked cuticle homolog 2
ILMN_1665562	6.27e-08	3.21e-09	-6.52827	10.5536	-0.880839	PLIN1	perilipin 1
ILMN_1740648	0.0102	0.00243	-3.11535	-2.46676	-0.880123	CYP2D6	cytochrome P450 family 2 subfamily D member 6
ILMN_1721046	7.17e-06	6.09e-07	-5.34759	5.43693	-0.879617	PTMS	parathymosin
ILMN_2150019	8.53e-10	2.86e-11	-7.5292	15.1855	-0.879225	SUCLA2	succinate-CoA ligase ADP-forming beta subunit
ILMN_1798528	9.23e-06	8.05e-07	-5.28163	5.16596	-0.878606	SULT1A2	sulfotransferase family 1A member 2
ILMN_1691449	0.0011	0.00017	-3.91411	0.022922	-0.877704
ILMN_1662932	5.33e-05	5.69e-06	-4.80769	3.27546	-0.876333	LCP1	lymphocyte cytosolic protein 1
ILMN_1750130	0.00112	0.000175	-3.90713	-0.000675	-0.876037	GSPT1	G1 to S phase transition 1
ILMN_1750748	5.51e-06	4.53e-07	-5.4173	5.72522	-0.874618
ILMN_2131381	2.83e-07	1.72e-08	-6.16099	8.9135	-0.874183	PDE3B	phosphodiesterase 3B
ILMN_1703891	4.03e-10	1.25e-11	-7.70185	16.0029	-0.873804	TBC1D9	TBC1 domain family member 9
ILMN_1662942	7.5e-16	5.53e-18	-10.6825	30.4332	-0.87076
ILMN_1730260	1.25e-10	3.45e-12	-7.96755	17.2688	-0.870007	EEF1AKMT1	eukaryotic translation elongation factor 1 alpha lysine methyltransferase 1
ILMN_1670305	1.05e-06	7.31e-08	-5.83673	7.49953	-0.869656	SERPING1	serpin family G member 1
ILMN_1762606	7.92e-05	8.79e-06	-4.69867	2.85562	-0.869579	AQP11	aquaporin 11
ILMN_1709894	1.7e-08	7.68e-10	-6.83615	11.9557	-0.868818	CLPX	caseinolytic mitochondrial matrix peptidase chaperone subunit
ILMN_2076640	0.000369	4.93e-05	-4.25277	1.20286	-0.868329	KHDRBS1	KH RNA binding domain containing, signal transduction associated 1
ILMN_1769546	1.11e-11	2.33e-13	-8.51956	19.9231	-0.868134	RIN2	Ras and Rab interactor 2
ILMN_1782611	5.34e-08	2.7e-09	-6.56578	10.7232	-0.867512
ILMN_1802808	6.37e-06	5.33e-07	-5.37886	5.56602	-0.867212
ILMN_1752968	2.94e-07	1.79e-08	-6.15165	8.87231	-0.866391	LAMB2	laminin subunit beta 2
ILMN_1724533	0.00014	1.66e-05	-4.53654	2.24237	-0.866256	LY96	lymphocyte antigen 96
ILMN_1815480	0.00474	0.000953	-3.41033	-1.59842	-0.865379	NAT8	N-acetyltransferase 8 (putative)
ILMN_1749070	7e-10	2.29e-11	-7.57562	15.4048	-0.865356	HLA-DPB1	major histocompatibility complex, class II, DP beta 1
ILMN_2193213	1.42e-08	6.29e-10	-6.87854	12.1505	-0.865153	DEFA1	defensin alpha 1
ILMN_1764457	0.000751	0.00011	-4.03594	0.439482	-0.86479
ILMN_2407879	1.98e-07	1.15e-08	-6.24857	9.3011	-0.863993	SORBS2	sorbin and SH3 domain containing 2
ILMN_1673960	4.14e-05	4.27e-06	-4.87876	3.55233	-0.863561	MAT2B	methionine adenosyltransferase 2B
ILMN_1680770	0.00079	0.000116	-4.02009	0.384756	-0.863482	UBQLN2	ubiquilin 2
ILMN_1751452	3.45e-06	2.69e-07	-5.53855	6.23134	-0.863076	NDFIP1	Nedd4 family interacting protein 1
ILMN_2246410	2.47e-06	1.87e-07	-5.62272	6.58597	-0.863035	CXCR4	C-X-C motif chemokine receptor 4
ILMN_1707464	0.00029	3.76e-05	-4.32456	1.46164	-0.862375	MST1	macrophage stimulating 1
ILMN_1726138	1.23e-11	2.61e-13	-8.49619	19.8102	-0.862165	EI24	EI24, autophagy associated transmembrane protein
ILMN_1728337	8.26e-06	7.12e-07	-5.3108	5.28555	-0.862079	PGM5	phosphoglucomutase 5
ILMN_1708660	3.4e-08	1.64e-09	-6.67394	11.2141	-0.86131	RWDD4	RWD domain containing 4
ILMN_1742789	1.1e-06	7.65e-08	-5.82631	7.4547	-0.860549	LPXN	leupaxin
ILMN_1794017	1.23e-07	6.84e-09	-6.36342	9.81273	-0.860067	SERTAD1	SERTA domain containing 1
ILMN_1887267	2.71e-19	9.47e-22	-12.4728	38.9965	-0.858286	HAND2-AS1	HAND2 antisense RNA 1 (head to head)
ILMN_1679045	1.9e-13	2.55e-15	-9.43729	24.3786	-0.858283	SBDS	SBDS ribosome assembly guanine nucleotide exchange factor
ILMN_1714397	0.000493	6.81e-05	-4.16603	0.894155	-0.857886	CRYL1	crystallin lambda 1
ILMN_2070940	1.16e-06	8.08e-08	-5.81404	7.40192	-0.856467	CD302	CD302 molecule
ILMN_1696087	5.05e-07	3.23e-08	-6.02031	8.29589	-0.856128	PHB2	prohibitin 2
ILMN_2198812	7.95e-12	1.6e-13	-8.59627	20.294	-0.855786	FDX1	ferredoxin 1
ILMN_1738578	2.61e-09	9.78e-11	-7.27234	13.9781	-0.855666	FILIP1L	filamin A interacting protein 1 like
ILMN_1759631	9.9e-08	5.34e-09	-6.41776	10.0561	-0.854941	SERPINA4	serpin family A member 4
ILMN_2198912	0.000384	5.14e-05	-4.24129	1.16178	-0.854729	TTR	transthyretin
ILMN_1655710	2.45e-07	1.47e-08	-6.19577	9.06714	-0.854655
ILMN_1787518	0.000451	6.16e-05	-4.19321	0.990451	-0.85432	GSN	gelsolin
ILMN_1662438	2.19e-07	1.29e-08	-6.2236	9.19033	-0.853303	SOD1	superoxide dismutase 1, soluble
ILMN_1785113	8.15e-09	3.4e-10	-7.0096	12.7552	-0.852391	MUT	methylmalonyl-CoA mutase
ILMN_1691104	1.59e-08	7.12e-10	-6.85234	12.0301	-0.852265	PGAM4	phosphoglycerate mutase family member 4
ILMN_1808157	0.00018	2.2e-05	-4.46482	1.97548	-0.851578	RUNDC3B	RUN domain containing 3B
ILMN_1813338	5.43e-05	5.8e-06	-4.8028	3.25654	-0.850853	LAG3	lymphocyte activating 3
ILMN_2139761	2.96e-05	2.93e-06	-4.97119	3.91602	-0.850736	LIMCH1	LIM and calponin homology domains 1
ILMN_1709584	3.87e-06	3.05e-07	-5.50954	6.1097	-0.850502
ILMN_1688480	0.00192	0.000327	-3.72836	-0.594325	-0.850366	CCND1	cyclin D1
ILMN_1681437	0.000704	0.000102	-4.05581	0.508277	-0.850362	DCXR	dicarbonyl and L-xylulose reductase
ILMN_1775542	1.53e-07	8.69e-09	-6.31109	9.57912	-0.849842	FCMR	Fc fragment of IgM receptor
ILMN_2069945	8.51e-05	9.52e-06	-4.67873	2.77946	-0.848962	SNRNP27	small nuclear ribonucleoprotein U4/U6.U5 subunit 27
ILMN_1664738	1.52e-06	1.09e-07	-5.74515	7.10662	-0.847988	C11orf54	chromosome 11 open reading frame 54
ILMN_1779857	1.62e-15	1.32e-17	-10.5057	29.576	-0.847903	KLF4	Kruppel like factor 4
ILMN_1848552	7.53e-05	8.3e-06	-4.71317	2.91112	-0.847274	NFIB	nuclear factor I B
ILMN_1789095	1.04e-07	5.62e-09	-6.40636	10.005	-0.844863	BMPR2	bone morphogenetic protein receptor type 2
ILMN_2184064	1.54e-10	4.36e-12	-7.91904	17.0371	-0.844699	ARRDC4	arrestin domain containing 4
ILMN_1809537	4.82e-14	5.7e-16	-9.74063	25.8556	-0.84423	MASP1	mannan binding lectin serine peptidase 1
ILMN_1754195	1.14e-06	7.95e-08	-5.81763	7.41734	-0.844032	RPL31	ribosomal protein L31
ILMN_1738989	0.000792	0.000117	-4.01926	0.381892	-0.842829	SYBU	syntabulin
ILMN_1740426	0.00633	0.00135	-3.30228	-1.92373	-0.841505	RASD1	ras related dexamethasone induced 1
ILMN_1711439	1.27e-08	5.57e-10	-6.90458	12.2704	-0.841352	EMILIN1	elastin microfibril interfacer 1
ILMN_2381899	0.000826	0.000122	-4.00624	0.337065	-0.841128	OPTN	optineurin
ILMN_2191192	0.000736	0.000107	-4.04211	0.460809	-0.840968	CYP2B7P	cytochrome P450 family 2 subfamily B member 7, pseudogene
ILMN_1718248	0.000292	3.79e-05	-4.3225	1.45417	-0.840838	CFHR5	complement factor H related 5
ILMN_1654583	1.69e-09	6.05e-11	-7.37305	14.4501	-0.840614	CHD1	chromodomain helicase DNA binding protein 1
ILMN_1795930	7.23e-12	1.44e-13	-8.6183	20.4005	-0.839038	PTGER4	prostaglandin E receptor 4
ILMN_1761281	3.54e-06	2.77e-07	-5.5316	6.20214	-0.838448
ILMN_1740920	4.28e-05	4.43e-06	-4.86948	3.51604	-0.838443	ACADSB	acyl-CoA dehydrogenase, short/branched chain
ILMN_2101278	1.18e-14	1.15e-16	-10.0663	27.441	-0.838441	RGS18	regulator of G-protein signaling 18
ILMN_1763663	3.94e-08	1.93e-09	-6.6384	11.0525	-0.836621
ILMN_1788961	4.36e-13	6.29e-15	-9.25388	23.4858	-0.836389	PPP2R2A	protein phosphatase 2 regulatory subunit Balpha
ILMN_1812666	3.93e-07	2.47e-08	-6.08021	8.55811	-0.835815	DNAJC15	DnaJ heat shock protein family (Hsp40) member C15
ILMN_1683023	2.35e-09	8.71e-11	-7.29675	14.0923	-0.835456	PDGFC	platelet derived growth factor C
ILMN_1667948	5.33e-07	3.44e-08	-6.00644	8.23533	-0.835175	SPATA18	spermatogenesis associated 18
ILMN_1759952	0.000542	7.57e-05	-4.13729	0.792844	-0.834658	PSMA5	proteasome subunit alpha 5
ILMN_1803213	0.00013	1.54e-05	-4.55677	2.31812	-0.83446	MXRA5	matrix remodeling associated 5
ILMN_1715273	0.000327	4.31e-05	-4.2885	1.3313	-0.834277	PICALM	phosphatidylinositol binding clathrin assembly protein
ILMN_1676014	8.22e-08	4.33e-09	-6.46334	10.2609	-0.833315
ILMN_1672191	9.95e-05	1.13e-05	-4.63429	2.61047	-0.832322	ATP5F1	ATP synthase, H+ transporting, mitochondrial Fo complex subunit B1
ILMN_1660847	0.000527	7.34e-05	-4.14587	0.823038	-0.831241	PFKFB3	6-phosphofructo-2-kinase/fructose-2,6-biphosphatase 3
ILMN_1740015	7.83e-05	8.67e-06	-4.70224	2.86926	-0.829268	CD14	CD14 molecule
ILMN_1701855	0.0101	0.00242	-3.1162	-2.46435	-0.829212	PPP1CC	protein phosphatase 1 catalytic subunit gamma
ILMN_1664466	3.52e-05	3.57e-06	-4.92284	3.72528	-0.829033	KLHL9	kelch like family member 9
ILMN_1664216	1.12e-09	3.87e-11	-7.4667	14.8907	-0.828703	NKIRAS1	NFKB inhibitor interacting Ras like 1
ILMN_1700340	1.23e-05	1.1e-06	-5.2065	4.8596	-0.828696	ASGR2	asialoglycoprotein receptor 2
ILMN_1753534	0.00379	0.000729	-3.49147	-1.34877	-0.828481	RPS18	ribosomal protein S18
ILMN_1792389	7.35e-06	6.27e-07	-5.34088	5.40927	-0.828275	RNF165	ring finger protein 165
ILMN_1692056	1.57e-16	9.57e-19	-11.041	32.1659	-0.82798	HS3ST3A1	heparan sulfate-glucosamine 3-sulfotransferase 3A1
ILMN_1738346	0.000251	3.2e-05	-4.36721	1.61671	-0.827743	MICU2	mitochondrial calcium uptake 2
ILMN_1743784	0.00108	0.000167	-3.91959	0.041448	-0.82774	SHMT1	serine hydroxymethyltransferase 1
ILMN_1660021	0.00175	0.000294	-3.75945	-0.492556	-0.827717	PLIN3	perilipin 3
ILMN_1800512	6.64e-05	7.24e-06	-4.74766	3.04356	-0.826927	HMOX1	heme oxygenase 1
ILMN_1748767	0.000571	8.04e-05	-4.12093	0.735381	-0.825548
ILMN_1849013	1.86e-06	1.36e-07	-5.69466	6.89122	-0.823652	IL6ST	interleukin 6 signal transducer
ILMN_2200659	0.000796	0.000117	-4.01768	0.376461	-0.823506	SNHG5	small nucleolar RNA host gene 5
ILMN_1813669	6.83e-13	1.05e-14	-9.14978	22.9795	-0.823394	ANKS1A	ankyrin repeat and sterile alpha motif domain containing 1A
ILMN_1749324	0.00877	0.00202	-3.17468	-2.29718	-0.82334	DPYS	dihydropyrimidinase
ILMN_1758229	1.68e-07	9.64e-09	-6.28832	9.47775	-0.823263	QSOX1	quiescin sulfhydryl oxidase 1
ILMN_1756130	0.00368	0.000705	-3.50157	-1.31736	-0.822968
ILMN_1791826	0.000106	1.22e-05	-4.61623	2.54207	-0.822081	RAB25	RAB25, member RAS oncogene family
ILMN_2367428	4.81e-05	5.07e-06	-4.8363	3.38665	-0.821874	FAM96A	family with sequence similarity 96 member A
ILMN_1700547	6.52e-06	5.48e-07	-5.37262	5.5402	-0.82168	CHST9	carbohydrate sulfotransferase 9
ILMN_2100209	1.56e-11	3.43e-13	-8.44046	19.5411	-0.821573
ILMN_1752895	1.13e-08	4.9e-10	-6.93195	12.3965	-0.821407	STX8	syntaxin 8
ILMN_1816634	4.73e-16	3.29e-18	-10.7884	30.9456	-0.820208
ILMN_1717888	0.00127	0.000201	-3.86704	-0.135562	-0.819669	KHK	ketohexokinase
ILMN_1735680	2.87e-09	1.09e-10	-7.25015	13.8743	-0.819283	TMEM30A	transmembrane protein 30A
ILMN_1761120	7.39e-06	6.3e-07	-5.33965	5.40421	-0.818855	TM2D3	TM2 domain containing 3
ILMN_1896261	6.96e-10	2.27e-11	-7.57733	15.4129	-0.818779
ILMN_1668446	4.37e-17	2.28e-19	-11.3352	33.5827	-0.818463	ABCA9	ATP binding cassette subfamily A member 9
ILMN_1676924	6.48e-06	5.43e-07	-5.37444	5.54771	-0.818196	CD247	CD247 molecule
ILMN_1676005	2.19e-05	2.11e-06	-5.05097	4.23313	-0.818112	KPNA1	karyopherin subunit alpha 1
ILMN_1736585	0.00218	0.000379	-3.68574	-0.732796	-0.817942	TMED10	transmembrane p24 trafficking protein 10
ILMN_1724738	0.000201	2.48e-05	-4.43331	1.85908	-0.817711	TFR2	transferrin receptor 2
ILMN_1795762	8.52e-05	9.53e-06	-4.67841	2.77824	-0.817123	PLEK	pleckstrin
ILMN_1779633	0.000152	1.82e-05	-4.51307	2.1547	-0.817034	PSMD6	proteasome 26S subunit, non-ATPase 6
ILMN_1713491	5.16e-10	1.64e-11	-7.64501	15.7334	-0.816291	VAMP2	vesicle associated membrane protein 2
ILMN_1670870	0.000923	0.000139	-3.97123	0.217073	-0.816056	ALCAM	activated leukocyte cell adhesion molecule
ILMN_1683883	3.86e-06	3.04e-07	-5.51032	6.11299	-0.815033	ACY1	aminoacylase 1
ILMN_1815203	0.0018	0.000304	-3.74911	-0.526468	-0.8138	HMGCS2	3-hydroxy-3-methylglutaryl-CoA synthase 2
ILMN_1886493	0.000387	5.19e-05	-4.23888	1.15315	-0.813454	HNRNPA2B1	heterogeneous nuclear ribonucleoprotein A2/B1
ILMN_1697200	0.00016	1.93e-05	-4.49888	2.10186	-0.81304	MON2	MON2 homolog, regulator of endosome-to-Golgi trafficking
ILMN_1762764	0.000553	7.75e-05	-4.13084	0.770199	-0.812382	SH3BGRL2	SH3 domain binding glutamate rich protein like 2
ILMN_1779324	0.000242	3.06e-05	-4.37837	1.65749	-0.811709	GZMA	granzyme A
ILMN_2229940	2.95e-06	2.26e-07	-5.57904	6.40162	-0.811661	PRADC1	protease associated domain containing 1
ILMN_1703949	0.00826	0.00188	-3.19792	-2.23002	-0.811634	KPNB1	karyopherin subunit beta 1
ILMN_1788250	5.85e-10	1.88e-11	-7.61651	15.5983	-0.810594	LDOC1	leucine zipper down-regulated in cancer 1
ILMN_1734897	6.01e-08	3.07e-09	-6.53825	10.5986	-0.810165	SLC4A4	solute carrier family 4 member 4
ILMN_1657632	5.35e-06	4.39e-07	-5.42471	5.75597	-0.809914	ZMYM6	zinc finger MYM-type containing 6
ILMN_1664583	0.00071	0.000103	-4.05321	0.499253	-0.809909
ILMN_1754839	0.0012	0.000189	-3.88491	-0.075583	-0.809886	DHX15	DEAH-box helicase 15
ILMN_2412380	0.000194	2.4e-05	-4.44198	1.89105	-0.809762	TSC22D1	TSC22 domain family member 1
ILMN_1668417	2.02e-14	2.13e-16	-9.94022	26.8274	-0.809549	WIPF1	WAS/WASL interacting protein family member 1
ILMN_1912287	4.22e-05	4.36e-06	-4.87328	3.53091	-0.809144	SUCNR1	succinate receptor 1
ILMN_1790317	0.000248	3.15e-05	-4.3714	1.63204	-0.808824	RAB26	RAB26, member RAS oncogene family
ILMN_1755215	1.15e-05	1.02e-06	-5.22503	4.93492	-0.808498	SAMD5	sterile alpha motif domain containing 5
ILMN_2352917	4.73e-09	1.87e-10	-7.13541	13.3391	-0.808076	LTBP4	latent transforming growth factor beta binding protein 4
ILMN_2354269	1.29e-10	3.55e-12	-7.96169	17.2408	-0.808056	ZC2HC1C	zinc finger C2HC-type containing 1C
ILMN_1795922	2.92e-07	1.78e-08	-6.1533	8.8796	-0.808051	ZNF830	zinc finger protein 830
ILMN_1757757	0.000185	2.28e-05	-4.45585	1.94231	-0.807782	TM6SF2	transmembrane 6 superfamily member 2
ILMN_1766657	1.68e-05	1.57e-06	-5.12257	4.52018	-0.805864	STOM	stomatin
ILMN_1723962	9.75e-11	2.63e-12	-8.02364	17.5372	-0.805524	LXN	latexin
ILMN_1698365	1.53e-10	4.31e-12	-7.92151	17.0489	-0.804186	NHLRC3	NHL repeat containing 3
ILMN_1726980	1.32e-13	1.71e-15	-9.51776	24.7703	-0.802897	CYP4A22	cytochrome P450 family 4 subfamily A member 22
ILMN_1723874	4.09e-09	1.61e-10	-7.16816	13.4916	-0.802605	MRPS6	mitochondrial ribosomal protein S6
ILMN_2380754	0.000242	3.07e-05	-4.37771	1.65506	-0.802245	CCNG1	cyclin G1
ILMN_1755733	0.0024	0.000426	-3.65128	-0.843909	-0.802027	RPLP2	ribosomal protein lateral stalk subunit P2
ILMN_1726545	1.29e-14	1.27e-16	-10.0447	27.336	-0.800578	LILRA5	leukocyte immunoglobulin like receptor A5
ILMN_1671766	0.0048	0.000969	-3.40514	-1.61424	-0.800449	F12	coagulation factor XII
ILMN_1693552	6.44e-07	4.25e-08	-5.95879	8.02777	-0.800315	CD300A	CD300a molecule
ILMN_1723706	0.00293	0.000539	-3.5819	-1.06521	-0.800307	GRAMD4	GRAM domain containing 4
ILMN_1764709	8.38e-05	9.36e-06	-4.68289	2.79534	-0.799576	MAFB	MAF bZIP transcription factor B
ILMN_1804735	0.00362	0.000691	-3.50793	-1.29757	-0.799495	CBS	cystathionine-beta-synthase
ILMN_1674385	0.00462	0.000925	-3.41952	-1.57039	-0.799429	YWHAQ	tyrosine 3-monooxygenase/tryptophan 5-monooxygenase activation protein theta
ILMN_2173004	2.79e-05	2.76e-06	-4.98574	3.97364	-0.799327	RAB8B	RAB8B, member RAS oncogene family
ILMN_1752520	1.45e-10	4.08e-12	-7.9328	17.1028	-0.79851	SLFN11	schlafen family member 11
ILMN_1800626	1.23e-09	4.25e-11	-7.44674	14.7967	-0.7985	SESN1	sestrin 1
ILMN_2120210	1.08e-05	9.52e-07	-5.24187	5.00351	-0.798335	RCAN2	regulator of calcineurin 2
ILMN_1804339	3.25e-05	3.25e-06	-4.94587	3.81599	-0.79797	CAMK1G	calcium/calmodulin dependent protein kinase IG
ILMN_1814022	1.57e-05	1.45e-06	-5.14133	4.59578	-0.797544	NR1H3	nuclear receptor subfamily 1 group H member 3
ILMN_1684289	0.000225	2.82e-05	-4.39959	1.73517	-0.796949	PNPO	pyridoxamine 5'-phosphate oxidase
ILMN_1760490	0.000151	1.82e-05	-4.51399	2.15815	-0.796031	ACVR1	activin A receptor type 1
ILMN_1767657	0.00288	0.000528	-3.58822	-1.04518	-0.795625	MAT1A	methionine adenosyltransferase 1A
ILMN_1701007	0.000613	8.72e-05	-4.09881	0.657953	-0.795544	PON3	paraoxonase 3
ILMN_1853529	1.85e-15	1.52e-17	-10.4769	29.4361	-0.793995
ILMN_1687533	2.73e-05	2.68e-06	-4.99268	4.00114	-0.793739	SEMA4D	semaphorin 4D
ILMN_1780132	1.1e-12	1.8e-14	-9.04034	22.4474	-0.792501	PELI2	pellino E3 ubiquitin protein ligase family member 2
ILMN_1775082	2.75e-11	6.4e-13	-8.31328	18.928	-0.792465	AGL	amylo-alpha-1, 6-glucosidase, 4-alpha-glucanotransferase
ILMN_2395974	0.00412	0.000807	-3.46091	-1.44334	-0.792062	PRDX3	peroxiredoxin 3
ILMN_1719906	1.21e-06	8.45e-08	-5.80374	7.35764	-0.79201	HADH	hydroxyacyl-CoA dehydrogenase
ILMN_2123402	5.49e-05	5.87e-06	-4.79964	3.2443	-0.79152	CNPY2	canopy FGF signaling regulator 2
ILMN_1759910	6.62e-05	7.2e-06	-4.74893	3.04844	-0.791488	SERPINA5	serpin family A member 5
ILMN_2355168	0.00483	0.000976	-3.40289	-1.6211	-0.791026	MGST1	microsomal glutathione S-transferase 1
ILMN_1671263	0.0196	0.00561	-2.83432	-3.23409	-0.790686	CACNA1H	calcium voltage-gated channel subunit alpha1 H
ILMN_1652128	4.54e-06	3.65e-07	-5.46776	5.93516	-0.790677	LMBRD1	LMBR1 domain containing 1
ILMN_1721762	9.85e-09	4.18e-10	-6.96553	12.5515	-0.79038	IL18RAP	interleukin 18 receptor accessory protein
ILMN_2107184	2.18e-08	1.01e-09	-6.77806	11.6894	-0.789416	SNRK	SNF related kinase
ILMN_1735779	0.000479	6.59e-05	-4.17494	0.925679	-0.788928	KCNJ8	potassium voltage-gated channel subfamily J member 8
ILMN_1673654	1.23e-05	1.11e-06	-5.20511	4.85395	-0.787449
ILMN_1804396	0.000157	1.9e-05	-4.50304	2.11736	-0.787026	IRF2BPL	interferon regulatory factor 2 binding protein like
ILMN_2289381	0.000186	2.28e-05	-4.45547	1.94087	-0.786882	DKK3	dickkopf WNT signaling pathway inhibitor 3
ILMN_1667711	0.000524	7.3e-05	-4.14726	0.827934	-0.786678	PLA2G16	phospholipase A2 group XVI
ILMN_2061043	1.51e-13	1.99e-15	-9.48754	24.6232	-0.786634	CD48	CD48 molecule
ILMN_2073235	2.72e-05	2.67e-06	-4.99337	4.00389	-0.78655
ILMN_1788778	2.59e-07	1.56e-08	-6.18264	9.0091	-0.78652	SEPT11	septin 11
ILMN_2327947	0.00022	2.75e-05	-4.40647	1.76039	-0.786484	SLC25A25	solute carrier family 25 member 25
ILMN_1786197	1.48e-06	1.06e-07	-5.75268	7.1388	-0.785995	NR2F1	nuclear receptor subfamily 2 group F member 1
ILMN_1778730	2.14e-07	1.26e-08	-6.2292	9.21517	-0.785957	MRPL39	mitochondrial ribosomal protein L39
ILMN_2105308	0.000474	6.5e-05	-4.17838	0.937864	-0.785796	DPM1	dolichyl-phosphate mannosyltransferase subunit 1, catalytic
ILMN_2413278	1.45e-11	3.16e-13	-8.45716	19.6217	-0.785709	RPL13	ribosomal protein L13
ILMN_1681526	5.6e-11	1.4e-12	-8.15258	18.1553	-0.78547	SLC5A1	solute carrier family 5 member 1
ILMN_1684349	2.02e-05	1.92e-06	-5.07325	4.32223	-0.785309	IL2RB	interleukin 2 receptor subunit beta
ILMN_1683146	0.0147	0.00388	-2.95991	-2.8986	-0.785267	FTH1	ferritin heavy chain 1
ILMN_1692938	0.00011	1.27e-05	-4.60631	2.50458	-0.784717	PSAT1	phosphoserine aminotransferase 1
ILMN_1757646	4.38e-08	2.17e-09	-6.61316	10.9378	-0.784438	UFM1	ubiquitin fold modifier 1
ILMN_1764030	1.05e-11	2.18e-13	-8.53353	19.9906	-0.784323	CCL23	C-C motif chemokine ligand 23
ILMN_1783247	6.24e-07	4.1e-08	-5.96676	8.06242	-0.783774	C10orf11	chromosome 10 open reading frame 11
ILMN_2390544	1.67e-05	1.55e-06	-5.12499	4.52993	-0.783519	FAM149A	family with sequence similarity 149 member A
ILMN_1701017	0.061	0.0259	-2.26228	-4.60245	-0.783165	SAA1	serum amyloid A1
ILMN_1781859	0.00489	0.000991	-3.39811	-1.63565	-0.782952	UGT2B28	UDP glucuronosyltransferase family 2 member B28
ILMN_1800078	2.01e-11	4.51e-13	-8.38488	19.273	-0.782785	LMO2	LIM domain only 2
ILMN_1697550	5.72e-09	2.31e-10	-7.09104	13.1328	-0.782385	ACYP2	acylphosphatase 2
ILMN_1691433	1.2e-07	6.62e-09	-6.37076	9.8456	-0.78238	PIK3R1	phosphoinositide-3-kinase regulatory subunit 1
ILMN_1689836	7.52e-08	3.93e-09	-6.48435	10.3555	-0.781533	C5AR1	complement component 5a receptor 1
ILMN_1656977	2.5e-07	1.5e-08	-6.19104	9.04624	-0.780871	HIBCH	3-hydroxyisobutyryl-CoA hydrolase
ILMN_1783500	5.64e-17	3e-19	-11.2787	33.311	-0.78076	HOXD12	homeobox D12
ILMN_1805800	0.000259	3.31e-05	-4.35808	1.58344	-0.780636	RAB5A	RAB5A, member RAS oncogene family
ILMN_1806778	0.000979	0.000149	-3.95181	0.150829	-0.780096	UBE2E1	ubiquitin conjugating enzyme E2 E1
ILMN_1711702	0.00857	0.00196	-3.18379	-2.2709	-0.779855	CLEC2D	C-type lectin domain family 2 member D
ILMN_1804174	6.58e-10	2.13e-11	-7.59049	15.4752	-0.779255	FCGR2B	Fc fragment of IgG receptor IIb
ILMN_1745471	1.15e-05	1.03e-06	-5.22414	4.93129	-0.77899	IRF9	interferon regulatory factor 9
ILMN_1814998	3.88e-06	3.06e-07	-5.50839	6.1049	-0.778951
ILMN_1732158	1.56e-07	8.84e-09	-6.30727	9.56212	-0.778703	FMO2	flavin containing monooxygenase 2
ILMN_1655987	4.52e-07	2.88e-08	-6.04628	8.40943	-0.777645	STAB1	stabilin 1
ILMN_2192385	1.86e-08	8.51e-10	-6.81405	11.8543	-0.777588	TTC19	tetratricopeptide repeat domain 19
ILMN_1784364	1.19e-05	1.06e-06	-5.21539	4.89571	-0.77719	STARD5	StAR related lipid transfer domain containing 5
ILMN_2283814	1.52e-11	3.34e-13	-8.44618	19.5687	-0.776805	MIR99AHG	mir-99a-let-7c cluster host gene
ILMN_1689712	0.00198	0.00034	-3.71683	-0.631893	-0.776637
ILMN_1745110	5.96e-12	1.16e-13	-8.66246	20.6142	-0.776518	LAPTM4A	lysosomal protein transmembrane 4 alpha
ILMN_2121408	1.74e-09	6.25e-11	-7.36625	14.4182	-0.776138	HBEGF	heparin binding EGF like growth factor
ILMN_1785380	2.37e-06	1.78e-07	-5.63385	6.63309	-0.775865	SLC1A2	solute carrier family 1 member 2
ILMN_2205211	0.00596	0.00126	-3.32451	-1.8575	-0.775785
ILMN_1651557	4.86e-06	3.95e-07	-5.44937	5.85853	-0.775502	KDELC2	KDEL motif containing 2
ILMN_1871940	1e-07	5.41e-09	-6.41479	10.0428	-0.775104
ILMN_1696254	2.09e-06	1.55e-07	-5.66522	6.7661	-0.774898	CYB5D2	cytochrome b5 domain containing 2
ILMN_1764788	6.95e-10	2.27e-11	-7.57792	15.4157	-0.772327	TNFRSF1B	TNF receptor superfamily member 1B
ILMN_1653205	0.00467	0.000937	-3.41539	-1.58298	-0.772292	C8orf59	chromosome 8 open reading frame 59
ILMN_1752837	0.000839	0.000124	-4.00161	0.321173	-0.771998	ARL8B	ADP ribosylation factor like GTPase 8B
ILMN_1756999	8.91e-08	4.76e-09	-6.44247	10.1671	-0.771801	RBL2	RB transcriptional corepressor like 2
ILMN_1722838	8.29e-07	5.62e-08	-5.89627	7.75658	-0.771535	MRPL46	mitochondrial ribosomal protein L46
ILMN_1658416	3.42e-06	2.66e-07	-5.54131	6.24291	-0.771174	MRPS18C	mitochondrial ribosomal protein S18C
ILMN_1697820	2.14e-07	1.26e-08	-6.22899	9.21423	-0.770926	HINT2	histidine triad nucleotide binding protein 2
ILMN_1807448	1.72e-07	9.9e-09	-6.2824	9.45142	-0.770916	FAM8A1	family with sequence similarity 8 member A1
ILMN_1679134	2.28e-05	2.21e-06	-5.04021	4.19018	-0.770371	NSMCE4A	NSE4 homolog A, SMC5-SMC6 complex component
ILMN_2395474	2.59e-08	1.22e-09	-6.73738	11.5034	-0.770353	REV1	REV1, DNA directed polymerase
ILMN_1729051	0.00645	0.00138	-3.29467	-1.94633	-0.770153	MSH6	mutS homolog 6
ILMN_1832208	0.00474	0.000954	-3.40988	-1.5998	-0.770112	TMEM33	transmembrane protein 33
ILMN_2060115	1.74e-05	1.63e-06	-5.11263	4.48021	-0.769966	SORL1	sortilin related receptor 1
ILMN_1675117	0.00143	0.000232	-3.82688	-0.269686	-0.769868	HSD17B11	hydroxysteroid 17-beta dehydrogenase 11
ILMN_1686981	6.62e-11	1.7e-12	-8.11325	17.9666	-0.769051	SULF2	sulfatase 2
ILMN_1795228	4.32e-06	3.45e-07	-5.48044	5.98805	-0.768972	ZFAND5	zinc finger AN1-type containing 5
ILMN_1788931	5e-12	9.49e-14	-8.70278	20.8095	-0.768956	DOCK8	dedicator of cytokinesis 8
ILMN_2143148	1.48e-06	1.06e-07	-5.75252	7.1381	-0.76843	TM2D1	TM2 domain containing 1
ILMN_2109156	1.84e-05	1.73e-06	-5.09828	4.42255	-0.768334	RANBP1	RAN binding protein 1
ILMN_1695290	1.27e-07	7.07e-09	-6.35624	9.78064	-0.767515	FERMT2	fermitin family member 2
ILMN_1719344	4.36e-06	3.49e-07	-5.47818	5.97861	-0.767163
ILMN_1682993	0.00551	0.00114	-3.35432	-1.7681	-0.766555	NKG7	natural killer cell granule protein 7
ILMN_2129161	2.33e-06	1.74e-07	-5.63839	6.6523	-0.76649	LRRC32	leucine rich repeat containing 32
ILMN_2371280	3.16e-05	3.15e-06	-4.95328	3.84524	-0.765869	CSF3R	colony stimulating factor 3 receptor
ILMN_1714527	1.01e-05	8.87e-07	-5.25863	5.07191	-0.765809	VAMP3	vesicle associated membrane protein 3
ILMN_1717337	0.00344	0.00065	-3.52603	-1.24107	-0.763641	2020-03-07	membrane associated ring-CH-type finger 7
ILMN_1790555	6.77e-07	4.5e-08	-5.94592	7.97184	-0.763356	CCDC146	coiled-coil domain containing 146
ILMN_2269380	4.34e-14	5e-16	-9.7673	25.9855	-0.763273	FNDC3A	fibronectin type III domain containing 3A
ILMN_2156250	9.91e-10	3.38e-11	-7.49477	15.023	-0.762046	SOCS3	suppressor of cytokine signaling 3
ILMN_1703244	1.2e-07	6.65e-09	-6.36983	9.84141	-0.760681	MAP1LC3B	microtubule associated protein 1 light chain 3 beta
ILMN_1700276	0.000143	1.71e-05	-4.52963	2.21653	-0.760363	JKAMP	JNK1/MAPK8-associated membrane protein
ILMN_1723480	0.0106	0.00256	-3.09842	-2.51465	-0.760053	BST2	bone marrow stromal cell antigen 2
ILMN_1780533	3.12e-05	3.11e-06	-4.95683	3.85927	-0.758689	RNASE6	ribonuclease A family member k6
ILMN_1654396	0.000752	0.00011	-4.03567	0.438537	-0.758642	ITGB2	integrin subunit beta 2
ILMN_1684211	0.0142	0.00374	-2.97215	-2.86526	-0.758639	SEC14L2	SEC14 like lipid binding 2
ILMN_1810729	1.35e-07	7.56e-09	-6.34155	9.71503	-0.758353	UBL3	ubiquitin like 3
ILMN_1682761	8.07e-12	1.63e-13	-8.59247	20.2755	-0.757353	SCIMP	SLP adaptor and CSK interacting membrane protein
ILMN_1702301	2.14e-07	1.26e-08	-6.2286	9.21253	-0.757282	DOCK10	dedicator of cytokinesis 10
ILMN_1711516	0.00587	0.00123	-3.33039	-1.83991	-0.755348	ATP6V1A	ATPase H+ transporting V1 subunit A
ILMN_1776188	0.000219	2.74e-05	-4.40772	1.76498	-0.754785	MAP1LC3A	microtubule associated protein 1 light chain 3 alpha
ILMN_1793651	0.00339	0.000639	-3.53116	-1.22499	-0.754289	UBE2N	ubiquitin conjugating enzyme E2 N
ILMN_2366192	0.00446	0.000887	-3.43235	-1.53113	-0.754118	FGL1	fibrinogen like 1
ILMN_1803775	0.00165	0.000274	-3.77898	-0.428286	-0.753937	HSPE1	heat shock protein family E (Hsp10) member 1
ILMN_2205896	1.11e-16	6.42e-19	-11.1226	32.5597	-0.752514	MEIS3P1	Meis homeobox 3 pseudogene 1
ILMN_1686750	0.00525	0.00108	-3.37193	-1.715	-0.752465	MGEA5	meningioma expressed antigen 5 (hyaluronidase)
ILMN_1661593	1.01e-06	6.99e-08	-5.84666	7.54235	-0.752117	TVP23B	trans-golgi network vesicle protein 23 homolog B (S. cerevisiae)
ILMN_1898518	0.00368	0.000706	-3.50132	-1.31815	-0.751614	GFRA1	GDNF family receptor alpha 1
ILMN_1773389	0.000186	2.29e-05	-4.45438	1.93685	-0.751566	PLTP	phospholipid transfer protein
ILMN_1767446	0.000195	2.41e-05	-4.44058	1.8859	-0.749781	RNF150	ring finger protein 150
ILMN_1652825	2.16e-06	1.61e-07	-5.65704	6.73137	-0.748784	IL10RA	interleukin 10 receptor subunit alpha
ILMN_2365595	2.27e-07	1.35e-08	-6.21399	9.14776	-0.748768	GMPR2	guanosine monophosphate reductase 2
ILMN_1752927	0.00324	0.000605	-3.54741	-1.17403	-0.748768	FAM160B1	family with sequence similarity 160 member B1
ILMN_1807291	0.0159	0.00429	-2.92629	-2.98959	-0.748657	CYP1A1	cytochrome P450 family 1 subfamily A member 1
ILMN_2128741	0.00315	0.000586	-3.55702	-1.14376	-0.747318	RDH11	retinol dehydrogenase 11 (all-trans/9-cis/11-cis)
ILMN_1771695	1.71e-19	5.49e-22	-12.5873	39.5347	-0.746969	RCBTB2	RCC1 and BTB domain containing protein 2
ILMN_1668065	0.000104	1.19e-05	-4.62299	2.56765	-0.746842	ELMOD3	ELMO domain containing 3
ILMN_1663916	1.07e-08	4.59e-10	-6.94573	12.46	-0.746445	ARHGAP9	Rho GTPase activating protein 9
ILMN_2189859	0.000271	3.49e-05	-4.34437	1.53355	-0.745984
ILMN_1807206	0.000393	5.28e-05	-4.23445	1.13731	-0.745952	DHRS1	dehydrogenase/reductase 1
ILMN_1705953	2.54e-09	9.48e-11	-7.27889	14.0087	-0.745739	LONRF1	LON peptidase N-terminal domain and ring finger 1
ILMN_1739541	4.29e-06	3.43e-07	-5.48219	5.99535	-0.745669	NMI	N-myc and STAT interactor
ILMN_1803819	1.17e-12	1.93e-14	-9.02612	22.3784	-0.74538	IQGAP1	IQ motif containing GTPase activating protein 1
ILMN_1791771	1.59e-07	9.06e-09	-6.30199	9.53858	-0.745197	HCK	HCK proto-oncogene, Src family tyrosine kinase
ILMN_2264981	0.00041	5.53e-05	-4.22206	1.0931	-0.744898	CYFIP2	cytoplasmic FMR1 interacting protein 2
ILMN_1715324	4.59e-06	3.69e-07	-5.46486	5.92304	-0.744183	HSD17B8	hydroxysteroid 17-beta dehydrogenase 8
ILMN_1743357	0.0612	0.0261	-2.26014	-4.60706	-0.743931	XPNPEP2	X-prolyl aminopeptidase 2
ILMN_1665435	0.000932	0.00014	-3.96777	0.205254	-0.743764	GPER1	G protein-coupled estrogen receptor 1
ILMN_1669876	0.0104	0.00251	-3.10446	-2.49759	-0.743606	CUX2	cut like homeobox 2
ILMN_1727740	0.000427	5.79e-05	-4.20985	1.04958	-0.742725	SYNCRIP	synaptotagmin binding cytoplasmic RNA interacting protein
ILMN_1672503	2.64e-05	2.59e-06	-5.00147	4.03605	-0.742674	DPYSL2	dihydropyrimidinase like 2
ILMN_1781013	0.0036	0.000687	-3.50964	-1.29224	-0.742449
ILMN_1800837	1.69e-06	1.23e-07	-5.71885	6.9943	-0.742238	CFDP1	craniofacial development protein 1
ILMN_1799598	3.02e-09	1.15e-10	-7.23914	13.8228	-0.741721	SIRT5	sirtuin 5
ILMN_2225698	1.74e-08	7.91e-10	-6.82968	11.926	-0.741662	NDUFA10	NADH:ubiquinone oxidoreductase subunit A10
ILMN_1653039	8.85e-07	6.04e-08	-5.87992	7.68589	-0.741439
ILMN_1717702	1.35e-10	3.75e-12	-7.95047	17.1872	-0.741399	KCNK17	potassium two pore domain channel subfamily K member 17
ILMN_1689037	0.00234	0.000414	-3.65963	-0.817048	-0.740963	LIPG	lipase G, endothelial type
ILMN_1711828	4.74e-06	3.83e-07	-5.45638	5.88771	-0.740662	ANKRD10	ankyrin repeat domain 10
ILMN_2167617	0.000223	2.79e-05	-4.40305	1.74786	-0.74058	NACA	nascent polypeptide-associated complex alpha subunit
ILMN_1684306	0.0017	0.000284	-3.76909	-0.460859	-0.740536	S100A4	S100 calcium binding protein A4
ILMN_1797391	0.0587	0.0245	-2.28483	-4.55365	-0.74037	SLC22A7	solute carrier family 22 member 7
ILMN_2291954	1.04e-12	1.69e-14	-9.05294	22.5087	-0.740315	SLA	Src-like-adaptor
ILMN_1686283	2.63e-06	1.99e-07	-5.60792	6.52343	-0.739999
ILMN_1844400	9.79e-05	1.11e-05	-4.63948	2.63016	-0.739669
ILMN_1770515	0.000907	0.000136	-3.9767	0.23578	-0.739422	UBE2V2	ubiquitin conjugating enzyme E2 V2
ILMN_2367010	0.000282	3.65e-05	-4.33211	1.48901	-0.739299	ADGRG6	adhesion G protein-coupled receptor G6
ILMN_1689146	4.49e-09	1.77e-10	-7.14715	13.3937	-0.738953	GABRP	gamma-aminobutyric acid type A receptor pi subunit
ILMN_1805773	6.3e-05	6.84e-06	-4.76172	3.09771	-0.738587	ART4	ADP-ribosyltransferase 4 (Dombrock blood group)
ILMN_1823937	0.00189	0.000322	-3.73274	-0.580032	-0.736789
ILMN_1789830	0.000243	3.08e-05	-4.37701	1.65251	-0.735715	CFLAR	CASP8 and FADD like apoptosis regulator
ILMN_1800396	0.000183	2.24e-05	-4.45992	1.95734	-0.735205	KCNH4	potassium voltage-gated channel subfamily H member 4
ILMN_1794560	1.28e-09	4.46e-11	-7.4369	14.7503	-0.734025	EMC6	ER membrane protein complex subunit 6
ILMN_1701497	5.86e-13	8.76e-15	-9.18673	23.1592	-0.733088	CD5L	CD5 molecule like
ILMN_1765578	3.14e-09	1.19e-10	-7.23057	13.7827	-0.73295	TIPARP	TCDD inducible poly(ADP-ribose) polymerase
ILMN_1732216	0.00584	0.00123	-3.33249	-1.83363	-0.732109	NARS	asparaginyl-tRNA synthetase
ILMN_1720858	1.15e-08	4.98e-10	-6.9283	12.3797	-0.731777	ABRACL	ABRA C-terminal like
ILMN_1655429	4e-06	3.17e-07	-5.50042	6.07153	-0.731198	TNFAIP1	TNF alpha induced protein 1
ILMN_1681754	0.0438	0.0164	-2.44373	-4.19758	-0.730178	GGH	gamma-glutamyl hydrolase
ILMN_1658486	1.4e-06	9.97e-08	-5.76622	7.19676	-0.729901	MRPL54	mitochondrial ribosomal protein L54
ILMN_1655557	1.2e-08	5.21e-10	-6.91894	12.3365	-0.729733	INTS6	integrator complex subunit 6
ILMN_1730710	3.81e-09	1.49e-10	-7.18448	13.5677	-0.729419	ADORA3	adenosine A3 receptor
ILMN_1779828	1.81e-07	1.04e-08	-6.27124	9.40176	-0.728177	EDEM1	ER degradation enhancing alpha-mannosidase like protein 1
ILMN_1754656	0.00753	0.00168	-3.23436	-2.12398	-0.727699	TCP10L	t-complex 10-like
ILMN_1759460	5.4e-05	5.76e-06	-4.80435	3.26254	-0.727298	TAF7	TATA-box binding protein associated factor 7
ILMN_1773066	3.88e-09	1.52e-10	-7.18022	13.5478	-0.727145	CDKN2AIP	CDKN2A interacting protein
ILMN_1747630	0.000146	1.75e-05	-4.52364	2.19416	-0.727032	DEK	DEK proto-oncogene
ILMN_1668469	6.23e-07	4.1e-08	-5.96718	8.06426	-0.726613	KIAA0922	KIAA0922
ILMN_1665865	0.000925	0.000139	-3.97016	0.213429	-0.726156	IGFBP4	insulin like growth factor binding protein 4
ILMN_1797793	9.56e-08	5.13e-09	-6.42618	10.0939	-0.725659	BLVRB	biliverdin reductase B
ILMN_1663427	9.38e-10	3.19e-11	-7.50701	15.0808	-0.725524
ILMN_2174369	0.0011	0.000172	-3.91198	0.015708	-0.725378	ELOVL5	ELOVL fatty acid elongase 5
ILMN_2088172	8.13e-05	9.04e-06	-4.69162	2.82865	-0.724493	POLR2B	RNA polymerase II subunit B
ILMN_1671509	0.00032	4.2e-05	-4.29503	1.35484	-0.724381	CCL3	C-C motif chemokine ligand 3
ILMN_1690487	0.000842	0.000125	-4.00009	0.315953	-0.724372	PCM1	pericentriolar material 1
ILMN_1780189	0.000969	0.000147	-3.95508	0.161981	-0.72435	PSMC5	proteasome 26S subunit, ATPase 5
ILMN_1685535	7.58e-08	3.96e-09	-6.48254	10.3473	-0.723629	LARP1B	La ribonucleoprotein domain family member 1B
ILMN_1795582	0.000146	1.75e-05	-4.5236	2.194	-0.723384	CHRD	chordin
ILMN_1769013	2.84e-06	2.17e-07	-5.58818	6.44012	-0.72319	ASGR1	asialoglycoprotein receptor 1
ILMN_1737918	0.000636	9.08e-05	-4.08781	0.619566	-0.722658	C1QA	complement C1q A chain
ILMN_1742187	1.09e-12	1.79e-14	-9.0422	22.4565	-0.722507	MAN1A1	mannosidase alpha class 1A member 1
ILMN_1796240	0.000397	5.34e-05	-4.23111	1.12538	-0.722254	TRAPPC8	trafficking protein particle complex 8
ILMN_1738095	2.82e-05	2.78e-06	-4.98353	3.96488	-0.721592	PER2	period circadian clock 2
ILMN_1781373	4.22e-05	4.37e-06	-4.87313	3.53032	-0.721544	IFIH1	interferon induced with helicase C domain 1
ILMN_1772612	0.000265	3.39e-05	-4.35158	1.55979	-0.721234	ANGPTL2	angiopoietin like 2
ILMN_1877204	2.77e-11	6.46e-13	-8.31118	18.9179	-0.720975	LOC105378749	uncharacterized LOC105378749
ILMN_1804328	0.016	0.00434	-2.92194	-3.00131	-0.720563	WWP1	WW domain containing E3 ubiquitin protein ligase 1
ILMN_1691790	0.00115	0.00018	-3.89825	-0.030649	-0.720255	DACT2	dishevelled binding antagonist of beta catenin 2
ILMN_1761808	1.11e-06	7.71e-08	-5.82452	7.44697	-0.719997	MCFD2	multiple coagulation factor deficiency 2
ILMN_2380418	1.28e-08	5.61e-10	-6.90287	12.2625	-0.719913	BICD2	BICD cargo adaptor 2
ILMN_1808661	0.000384	5.16e-05	-4.24068	1.1596	-0.717688	TOMM5	translocase of outer mitochondrial membrane 5
ILMN_1736054	0.000112	1.3e-05	-4.59967	2.47952	-0.717408	SUB1	SUB1 homolog, transcriptional regulator
ILMN_1690282	0.000445	6.07e-05	-4.19709	1.0042	-0.717254	CRADD	CASP2 and RIPK1 domain containing adaptor with death domain
ILMN_2106818	2.02e-11	4.55e-13	-8.38308	19.2643	-0.71695	MBIP	MAP3K12 binding inhibitory protein 1
ILMN_1671221	0.00124	0.000196	-3.87494	-0.109085	-0.716531	GAPVD1	GTPase activating protein and VPS9 domains 1
ILMN_1759997	0.000215	2.68e-05	-4.41287	1.7839	-0.716333	COMMD6	COMM domain containing 6
ILMN_1742260	1.23e-07	6.83e-09	-6.36391	9.81494	-0.71537	SSFA2	sperm specific antigen 2
ILMN_1740345	1.66e-10	4.71e-12	-7.90313	16.9611	-0.715246	THYN1	thymocyte nuclear protein 1
ILMN_1767448	1.65e-06	1.2e-07	-5.72408	7.01659	-0.714697	LHFP	lipoma HMGIC fusion partner
ILMN_1673639	1.61e-07	9.17e-09	-6.29919	9.52614	-0.714614	ABI3BP	ABI family member 3 binding protein
ILMN_1688818	6.12e-06	5.11e-07	-5.38891	5.60757	-0.714333
ILMN_1725471	0.00124	0.000196	-3.87453	-0.11043	-0.714309	GK	glycerol kinase
ILMN_2170949	1.92e-07	1.12e-08	-6.25498	9.32953	-0.713869	SNX10	sorting nexin 10
ILMN_2233401	0.000294	3.82e-05	-4.32059	1.44724	-0.71356
ILMN_2144573	3.03e-10	9.13e-12	-7.76644	16.3098	-0.713104	CTBS	chitobiase
ILMN_1806464	6.74e-16	4.85e-18	-10.7095	30.5638	-0.712654	PRSS55	protease, serine 55
ILMN_1679391	5.52e-13	8.16e-15	-9.20128	23.2299	-0.71257	MAMDC2	MAM domain containing 2
ILMN_1710000	1.98e-11	4.43e-13	-8.3886	19.2909	-0.712389	PEX11G	peroxisomal biogenesis factor 11 gamma
ILMN_1692661	8.05e-06	6.92e-07	-5.31757	5.31336	-0.711999	AKR1D1	aldo-keto reductase family 1, member D1
ILMN_1719749	1e-05	8.81e-07	-5.26047	5.07945	-0.711978	PTGES3	prostaglandin E synthase 3
ILMN_1733421	2.66e-06	2.02e-07	-5.60447	6.50886	-0.71195	PRKCQ	protein kinase C theta
ILMN_2056087	5.5e-10	1.76e-11	-7.6305	15.6646	-0.711756	IGF1	insulin like growth factor 1
ILMN_1765044	0.000122	1.42e-05	-4.57665	2.3928	-0.711633	CUTC	cutC copper transporter
ILMN_1670325	0.00321	0.000599	-3.55083	-1.16326	-0.711184	SLC47A1	solute carrier family 47 member 1
ILMN_1810962	0.00136	0.000218	-3.84386	-0.213106	-0.710788	PTPRK	protein tyrosine phosphatase, receptor type K
ILMN_2114568	9.3e-06	8.13e-07	-5.27956	5.15749	-0.710105	GBP5	guanylate binding protein 5
ILMN_1709479	8.27e-05	9.23e-06	-4.68647	2.80898	-0.70988	YAP1	Yes associated protein 1
ILMN_2102960	1.99e-08	9.12e-10	-6.79925	11.7865	-0.709203	FAM214A	family with sequence similarity 214 member A
ILMN_1666078	0.000981	0.000149	-3.95111	0.148445	-0.708995	HLA-H	major histocompatibility complex, class I, H (pseudogene)
ILMN_1711736	0.00129	0.000206	-3.86084	-0.156356	-0.708664	ADCYAP1R1	ADCYAP receptor type I
ILMN_1690223	0.0435	0.0162	-2.44802	-4.18766	-0.707763	CNTNAP2	contactin associated protein-like 2
ILMN_1680652	0.000462	6.32e-05	-4.18612	0.965282	-0.707176	SELENBP1	selenium binding protein 1
ILMN_1768117	0.00483	0.000976	-3.4029	-1.62107	-0.707078	RBM25	RNA binding motif protein 25
ILMN_2373515	0.0156	0.00418	-2.93474	-2.96681	-0.706155	HSP90AA1	heat shock protein 90 alpha family class A member 1
ILMN_2366212	3.28e-06	2.54e-07	-5.55145	6.28548	-0.70613	CD79B	CD79b molecule
ILMN_1735910	9.17e-07	6.28e-08	-5.87089	7.64687	-0.705976	VMO1	vitelline membrane outer layer 1 homolog
ILMN_1727195	0.000271	3.49e-05	-4.34446	1.53388	-0.705665	GLTPD2	glycolipid transfer protein domain containing 2
ILMN_1880406	0.00124	0.000197	-3.8732	-0.114911	-0.705147	PTEN	phosphatase and tensin homolog
ILMN_1755173	1.41e-05	1.29e-06	-5.17005	4.71183	-0.704724	PLEKHA4	pleckstrin homology domain containing A4
ILMN_1696027	0.000464	6.36e-05	-4.18455	0.959735	-0.704472
ILMN_1664492	0.00305	0.000564	-3.56877	-1.10672	-0.704231	CES1	carboxylesterase 1
ILMN_2168347	1.45e-11	3.17e-13	-8.45675	19.6197	-0.704002	EPOR	erythropoietin receptor
ILMN_1767747	0.00523	0.00107	-3.37369	-1.70968	-0.703233	HDAC2	histone deacetylase 2
ILMN_1806907	1.38e-05	1.26e-06	-5.1755	4.73388	-0.702172	PAWR	pro-apoptotic WT1 regulator
ILMN_1673421	1.22e-05	1.1e-06	-5.2081	4.86606	-0.702152
ILMN_1758941	0.000518	7.2e-05	-4.15096	0.840984	-0.702019	REEP5	receptor accessory protein 5
ILMN_1662263	7.37e-11	1.9e-12	-8.08981	17.8542	-0.701996	MDP1	magnesium dependent phosphatase 1
ILMN_1762712	0.000598	8.48e-05	-4.10663	0.685316	-0.698476	HHEX	hematopoietically expressed homeobox
ILMN_1807359	1.33e-07	7.46e-09	-6.34442	9.72782	-0.697869	CLEC11A	C-type lectin domain family 11 member A
ILMN_1873034	0.00031	4.05e-05	-4.30467	1.38964	-0.697728
ILMN_1749751	8.48e-14	1.04e-15	-9.61908	25.2637	-0.697002	KLHL17	kelch like family member 17
ILMN_1780861	0.00173	0.00029	-3.76273	-0.481793	-0.696303
ILMN_1792689	0.0123	0.0031	-3.03505	-2.69212	-0.696228	HIST1H2AC	histone cluster 1, H2ac
ILMN_1735461	0.00254	0.000454	-3.63289	-0.902892	-0.695667	DDX21	DEAD-box helicase 21
ILMN_1773017	0.00474	0.000953	-3.41026	-1.59864	-0.695184	EXOC3L4	exocyst complex component 3 like 4
ILMN_2199658	1.16e-09	4.01e-11	-7.45911	14.8549	-0.69485	ANKS4B	ankyrin repeat and sterile alpha motif domain containing 4B
ILMN_1719543	4.16e-06	3.31e-07	-5.49055	6.03029	-0.694527	MAF	MAF bZIP transcription factor
ILMN_1749109	0.000463	6.33e-05	-4.18548	0.963016	-0.694403	PSAP	prosaposin
ILMN_1654609	0.00017	2.07e-05	-4.48045	2.03341	-0.693136
ILMN_1795838	5.97e-12	1.16e-13	-8.66168	20.6105	-0.69263	C4orf19	chromosome 4 open reading frame 19
ILMN_2133100	2.45e-06	1.85e-07	-5.62513	6.59617	-0.691829	LPIN2	lipin 2
ILMN_2386205	1.58e-12	2.68e-14	-8.95972	22.0558	-0.690945	C21orf33	chromosome 21 open reading frame 33
ILMN_2183692	3.5e-06	2.73e-07	-5.53479	6.21554	-0.690032	PHYHD1	phytanoyl-CoA dioxygenase domain containing 1
ILMN_1739083	1.05e-08	4.47e-10	-6.95139	12.4862	-0.689329	SIRT1	sirtuin 1
ILMN_1716421	2.05e-05	1.96e-06	-5.06913	4.30572	-0.689289	ADRA1D	adrenoceptor alpha 1D
ILMN_1788462	9.79e-06	8.59e-07	-5.26644	5.10385	-0.688299
ILMN_1776879	0.000553	7.76e-05	-4.13084	0.770167	-0.688146	HMGN2	high mobility group nucleosomal binding domain 2
ILMN_2397028	0.000313	4.1e-05	-4.30151	1.37825	-0.688096	SERPINB8	serpin family B member 8
ILMN_2413816	2.7e-11	6.25e-13	-8.31796	18.9505	-0.687159	GRB14	growth factor receptor bound protein 14
ILMN_1767929	8.58e-08	4.55e-09	-6.45247	10.212	-0.68703
ILMN_2122103	7.19e-05	7.89e-06	-4.72595	2.96014	-0.686907	ETS1	ETS proto-oncogene 1, transcription factor
ILMN_1712298	0.00299	0.000551	-3.57527	-1.08617	-0.686564	ANKRD46	ankyrin repeat domain 46
ILMN_1672102	2.87e-09	1.08e-10	-7.25114	13.8789	-0.685727	PTPRB	protein tyrosine phosphatase, receptor type B
ILMN_1760027	5.96e-05	6.43e-06	-4.77709	3.15704	-0.684424	WAS	Wiskott-Aldrich syndrome
ILMN_1700950	0.0127	0.00323	-3.02089	-2.73134	-0.684207
ILMN_1815552	2.08e-05	1.99e-06	-5.0651	4.28962	-0.684084	NTAN1	N-terminal asparagine amidase
ILMN_2308849	9.78e-07	6.74e-08	-5.85508	7.57863	-0.68338	MYADM	myeloid associated differentiation marker
ILMN_1697906	6.86e-08	3.55e-09	-6.50617	10.4538	-0.682673	WBP4	WW domain binding protein 4
ILMN_1700316	0.0157	0.00423	-2.93061	-2.97795	-0.68257
ILMN_1749372	5.59e-11	1.4e-12	-8.15287	18.1567	-0.682273	GGT5	gamma-glutamyltransferase 5
ILMN_1751708	0.00414	0.00081	-3.45981	-1.44674	-0.681962	ITM2B	integral membrane protein 2B
ILMN_2171289	5.14e-15	4.59e-17	-10.2518	28.3431	-0.681393	SAMSN1	SAM domain, SH3 domain and nuclear localization signals 1
ILMN_1723020	0.0029	0.000533	-3.58543	-1.05402	-0.681165	MAP3K1	mitogen-activated protein kinase kinase kinase 1
ILMN_2319994	1.47e-05	1.35e-06	-5.15935	4.66854	-0.680972	RPL3	ribosomal protein L3
ILMN_2339266	1.8e-05	1.69e-06	-5.10489	4.44912	-0.680619	LAMA2	laminin subunit alpha 2
ILMN_1662799	2.47e-08	1.16e-09	-6.7486	11.5546	-0.680273	GPSM3	G-protein signaling modulator 3
ILMN_1797531	4.26e-10	1.33e-11	-7.68888	15.9414	-0.680094	PRKAG2	protein kinase AMP-activated non-catalytic subunit gamma 2
ILMN_2145760	4.26e-10	1.33e-11	-7.68861	15.9401	-0.680057	YIPF4	Yip1 domain family member 4
ILMN_1771385	0.000938	0.000142	-3.96559	0.197828	-0.679733	GBP4	guanylate binding protein 4
ILMN_1712678	3.49e-06	2.72e-07	-5.53592	6.22028	-0.678838	RPS27L	ribosomal protein S27 like
ILMN_1773561	9.51e-06	8.32e-07	-5.27381	5.13395	-0.678686	RAP2C	RAP2C, member of RAS oncogene family
ILMN_1695034	0.0179	0.00499	-2.87431	-3.1286	-0.677146
ILMN_1681651	3.3e-14	3.65e-16	-9.83098	26.2956	-0.676911	FOLH1	folate hydrolase (prostate-specific membrane antigen) 1
ILMN_1768194	2.6e-05	2.55e-06	-5.00493	4.0498	-0.676554	BIRC2	baculoviral IAP repeat containing 2
ILMN_1678690	0.0455	0.0172	-2.42368	-4.24366	-0.6764	UPB1	beta-ureidopropionase 1
ILMN_1651513	0.000106	1.23e-05	-4.61457	2.5358	-0.67627	SKIV2L2	Ski2 like RNA helicase 2
ILMN_1803799	2.23e-10	6.56e-12	-7.83499	16.6361	-0.675909
ILMN_1802628	6.73e-05	7.33e-06	-4.74426	3.03048	-0.675551	PLPP6	phospholipid phosphatase 6
ILMN_1726755	1.28e-05	1.16e-06	-5.19568	4.81567	-0.673667	COPS4	COP9 signalosome subunit 4
ILMN_1765633	1.45e-10	4.06e-12	-7.93396	17.1083	-0.673126
ILMN_1681520	9.36e-05	1.06e-05	-4.65209	2.67802	-0.673076	DGAT2	diacylglycerol O-acyltransferase 2
ILMN_1769245	2.97e-05	2.94e-06	-4.97047	3.91317	-0.6725	GLIPR1	GLI pathogenesis related 1
ILMN_1655549	8.55e-10	2.88e-11	-7.52842	15.1818	-0.671911	SIGLEC10	sialic acid binding Ig like lectin 10
ILMN_1680018	1.22e-06	8.6e-08	-5.79989	7.34112	-0.671886	RIPK4	receptor interacting serine/threonine kinase 4
ILMN_1795856	1.54e-08	6.88e-10	-6.85951	12.063	-0.671497
ILMN_1784269	1.73e-08	7.84e-10	-6.83173	11.9354	-0.671276	AASDH	aminoadipate-semialdehyde dehydrogenase
ILMN_2363658	3.04e-09	1.16e-10	-7.23736	13.8145	-0.67102	PXDN	peroxidasin
ILMN_1810838	0.00656	0.00141	-3.28844	-1.96482	-0.670947	MTDH	metadherin
ILMN_1811082	0.000174	2.12e-05	-4.47425	2.0104	-0.670543	C11orf1	chromosome 11 open reading frame 1
ILMN_1730685	1.12e-06	7.79e-08	-5.82241	7.4379	-0.669416	MRPL16	mitochondrial ribosomal protein L16
ILMN_1676663	8.08e-06	6.95e-07	-5.31634	5.30833	-0.669019	TNFRSF11B	TNF receptor superfamily member 11b
ILMN_1672024	3.16e-08	1.51e-09	-6.69127	11.293	-0.668903
ILMN_2169983	5.43e-07	3.51e-08	-6.00199	8.2159	-0.668361	ATAD1	ATPase family, AAA domain containing 1
ILMN_1795341	0.0108	0.00263	-3.08909	-2.54097	-0.668101	SRSF1	serine and arginine rich splicing factor 1
ILMN_2076658	1.87e-08	8.53e-10	-6.81357	11.8521	-0.66785	MRPL1	mitochondrial ribosomal protein L1
ILMN_1803348	3.58e-06	2.81e-07	-5.52875	6.1902	-0.667447	EHBP1	EH domain binding protein 1
ILMN_1702168	8.23e-06	7.09e-07	-5.31179	5.28963	-0.6672	HSD17B12	hydroxysteroid 17-beta dehydrogenase 12
ILMN_1719622	1.89e-09	6.86e-11	-7.34677	14.3268	-0.666742	RABEP1	rabaptin, RAB GTPase binding effector protein 1
ILMN_1671106	0.000478	6.57e-05	-4.17556	0.927864	-0.666646	GJA4	gap junction protein alpha 4
ILMN_2373670	0.0039	0.000754	-3.48148	-1.37976	-0.665925	UGT2B17	UDP glucuronosyltransferase family 2 member B17
ILMN_1758906	0.000489	6.74e-05	-4.16866	0.903476	-0.665924	GNA13	G protein subunit alpha 13
ILMN_1686477	2.28e-05	2.2e-06	-5.04043	4.19106	-0.665546	CNOT7	CCR4-NOT transcription complex subunit 7
ILMN_2323338	0.000937	0.000141	-3.96597	0.199104	-0.665545	NR1I2	nuclear receptor subfamily 1 group I member 2
ILMN_1773427	3.91e-05	3.99e-06	-4.8951	3.61636	-0.664747	KANK1	KN motif and ankyrin repeat domains 1
ILMN_1813117	6.5e-13	9.85e-15	-9.16302	23.0438	-0.664644	ITGA9	integrin subunit alpha 9
ILMN_1763000	7.63e-06	6.52e-07	-5.33142	5.37033	-0.664439	ADAP2	ArfGAP with dual PH domains 2
ILMN_2339202	2.93e-07	1.78e-08	-6.15249	8.87601	-0.663837	KTN1	kinectin 1
ILMN_1766261	0.00012	1.41e-05	-4.57925	2.40256	-0.663696	SLC2A12	solute carrier family 2 member 12
ILMN_2112417	0.00448	0.00089	-3.43119	-1.53468	-0.663634	PGAM1	phosphoglycerate mutase 1
ILMN_1718063	0.00163	0.000269	-3.78425	-0.41093	-0.663258	LIPA	lipase A, lysosomal acid type
ILMN_1699585	2.5e-05	2.44e-06	-5.01563	4.0923	-0.66315	BHLHE22	basic helix-loop-helix family member e22
ILMN_2147440	0.000815	0.00012	-4.01047	0.351634	-0.663134	MAN2A1	mannosidase alpha class 2A member 1
ILMN_1812915	7.23e-10	2.38e-11	-7.56801	15.3689	-0.662925	TNFRSF10B	TNF receptor superfamily member 10b
ILMN_1681356	2.22e-08	1.03e-09	-6.77297	11.6661	-0.661614	PDE2A	phosphodiesterase 2A
ILMN_1763891	2.87e-07	1.74e-08	-6.15739	8.89765	-0.661523
ILMN_2095840	0.00167	0.000279	-3.77397	-0.444797	-0.660455	KAT6A	lysine acetyltransferase 6A
ILMN_1805064	9.31e-07	6.39e-08	-5.86712	7.63061	-0.659847	SCARNA9	small Cajal body-specific RNA 9
ILMN_2100689	3.96e-10	1.22e-11	-7.70582	16.0218	-0.659651	MAP2K4	mitogen-activated protein kinase kinase 4
ILMN_1735014	3.67e-05	3.73e-06	-4.91168	3.68141	-0.659532	KLF6	Kruppel like factor 6
ILMN_1741462	3.18e-06	2.45e-07	-5.55977	6.32048	-0.659204	FAHD1	fumarylacetoacetate hydrolase domain containing 1
ILMN_1798690	3.15e-06	2.43e-07	-5.56231	6.33117	-0.6592	ADAMTSL3	ADAMTS like 3
ILMN_1740185	5.85e-06	4.84e-07	-5.40167	5.66041	-0.659001	TPMT	thiopurine S-methyltransferase
ILMN_1735453	2.09e-05	2e-06	-5.06431	4.28646	-0.658928	FAM98A	family with sequence similarity 98 member A
ILMN_1687303	4.06e-05	4.18e-06	-4.8842	3.57366	-0.658724	ACAD10	acyl-CoA dehydrogenase family member 10
ILMN_1730658	0.00177	0.000297	-3.75632	-0.502827	-0.658547	YTHDF2	YTH N6-methyladenosine RNA binding protein 2
ILMN_1795906	0.00122	0.000191	-3.88163	-0.086608	-0.65854	PCBD1	pterin-4 alpha-carbinolamine dehydratase 1
ILMN_2191681	0.00185	0.000313	-3.74115	-0.552534	-0.658193	CHCHD2	coiled-coil-helix-coiled-coil-helix domain containing 2
ILMN_1720311	0.00167	0.000278	-3.77522	-0.440675	-0.657939	SLC25A46	solute carrier family 25 member 46
ILMN_1754247	0.0136	0.00351	-2.99339	-2.80714	-0.657841	SLC3A1	solute carrier family 3 member 1
ILMN_1697024	0.000871	0.00013	-3.98934	0.279059	-0.657262	STYX	serine/threonine/tyrosine interacting protein
ILMN_1719656	0.00312	0.000579	-3.56095	-1.13138	-0.657068	MRPL38	mitochondrial ribosomal protein L38
ILMN_1755720	0.0371	0.0131	-2.52959	-3.9964	-0.656925	SLC2A2	solute carrier family 2 member 2
ILMN_1718936	3.97e-07	2.5e-08	-6.07772	8.54718	-0.655791	LST1	leukocyte specific transcript 1
ILMN_1719695	0.00159	0.000263	-3.79079	-0.389318	-0.655228	NFKBIZ	NFKB inhibitor zeta
ILMN_2351638	5.54e-06	4.55e-07	-5.41609	5.7202	-0.654871	BEX4	brain expressed X-linked 4
ILMN_1860288	2.1e-05	2.01e-06	-5.06278	4.28031	-0.654485	MBTPS2	membrane bound transcription factor peptidase, site 2
ILMN_1661363	0.00018	2.21e-05	-4.46389	1.97203	-0.653877
ILMN_1913678	1.15e-11	2.42e-13	-8.51229	19.8879	-0.65261	IRAK3	interleukin 1 receptor associated kinase 3
ILMN_2266184	0.00813	0.00184	-3.20475	-2.21022	-0.652413	NCALD	neurocalcin delta
ILMN_1770378	7.57e-06	6.47e-07	-5.33352	5.37898	-0.652207	ANAPC10	anaphase promoting complex subunit 10
ILMN_1709094	1.08e-14	1.05e-16	-10.0848	27.531	-0.651594	LIFR	leukemia inhibitory factor receptor alpha
ILMN_1786189	0.00146	0.000237	-3.82111	-0.288865	-0.650812	NIFK	nucleolar protein interacting with the FHA domain of MKI67
ILMN_1751393	3.86e-08	1.89e-09	-6.64317	11.0741	-0.65053	ZNF684	zinc finger protein 684
ILMN_1866887	0.000669	9.63e-05	-4.07186	0.563995	-0.65021	LMBRD2	LMBR1 domain containing 2
ILMN_1715125	1.53e-05	1.41e-06	-5.14758	4.62101	-0.649642	HAAO	3-hydroxyanthranilate 3,4-dioxygenase
ILMN_1705302	3.75e-07	2.35e-08	-6.09128	8.60666	-0.649565	FCGRT	Fc fragment of IgG receptor and transporter
ILMN_1674032	1.86e-07	1.08e-08	-6.2638	9.36873	-0.649455	ABCD3	ATP binding cassette subfamily D member 3
ILMN_1769705	5.03e-05	5.32e-06	-4.82408	3.33912	-0.64902	H3F3C	H3 histone, family 3C
ILMN_1717852	1.12e-05	9.99e-07	-5.23051	4.95724	-0.648924	USH1G	USH1 protein network component sans
ILMN_1678833	8.14e-11	2.13e-12	-8.06652	17.7425	-0.648667	CCR1	C-C motif chemokine receptor 1
ILMN_1748908	6.36e-07	4.2e-08	-5.96183	8.041	-0.647503	PROSC	proline synthetase cotranscribed homolog (bacterial)
ILMN_1654915	0.00319	0.000594	-3.55314	-1.15598	-0.647014
ILMN_1653504	1.69e-06	1.23e-07	-5.71859	6.9932	-0.646546	S1PR1	sphingosine-1-phosphate receptor 1
ILMN_1736965	1.88e-07	1.09e-08	-6.26121	9.35723	-0.645987	SIGIRR	single Ig and TIR domain containing
ILMN_2208903	0.0242	0.0074	-2.73677	-3.48618	-0.64582	CD52	CD52 molecule
ILMN_1695606	6.55e-18	2.87e-20	-11.7622	35.6276	-0.645782	EFNB3	ephrin B3
ILMN_1793894	0.000787	0.000116	-4.02141	0.389325	-0.645578	ANAPC13	anaphase promoting complex subunit 13
ILMN_1765019	4.59e-10	1.45e-11	-7.67066	15.8549	-0.64486	SACM1L	SAC1 suppressor of actin mutations 1-like (yeast)
ILMN_1724658	0.0059	0.00124	-3.32861	-1.84522	-0.644829	BNIP3	BCL2 interacting protein 3
ILMN_1678961	2.04e-06	1.51e-07	-5.67198	6.79481	-0.644696	FRMD4A	FERM domain containing 4A
ILMN_2079386	0.000474	6.51e-05	-4.17804	0.936651	-0.643477	RPL22	ribosomal protein L22
ILMN_1803811	0.000272	3.51e-05	-4.34283	1.52793	-0.642591	TRIB1	tribbles pseudokinase 1
ILMN_1896012	1.18e-14	1.15e-16	-10.0663	27.4407	-0.642087
ILMN_1814305	2.58e-06	1.95e-07	-5.61242	6.54245	-0.64193	SAMD9	sterile alpha motif domain containing 9
ILMN_1779234	0.00854	0.00196	-3.18495	-2.26755	-0.641887	CXCL6	C-X-C motif chemokine ligand 6
ILMN_1787251	3.54e-06	2.77e-07	-5.53146	6.20158	-0.64182	DAAM1	dishevelled associated activator of morphogenesis 1
ILMN_2109489	0.000415	5.61e-05	-4.21834	1.07981	-0.640914	GZMB	granzyme B
ILMN_1676749	3.19e-05	3.18e-06	-4.95089	3.8358	-0.640467	MAATS1	MYCBP associated and testis expressed 1
ILMN_2098743	1.54e-05	1.42e-06	-5.14597	4.61449	-0.64037	ACOT13	acyl-CoA thioesterase 13
ILMN_1674985	0.000892	0.000134	-3.9817	0.25287	-0.638988	TMEM51	transmembrane protein 51
ILMN_2187727	2.88e-06	2.2e-07	-5.58474	6.42563	-0.638945	NOC3L	NOC3 like DNA replication regulator
ILMN_1704785	0.000466	6.39e-05	-4.18333	0.9554	-0.638668	FUOM	fucose mutarotase
ILMN_1720241	5.87e-06	4.87e-07	-5.40027	5.6546	-0.638258	TRIP12	thyroid hormone receptor interactor 12
ILMN_1695745	4.68e-05	4.91e-06	-4.84433	3.41791	-0.63823	DISP1	dispatched RND transporter family member 1
ILMN_2361575	6.48e-09	2.65e-10	-7.0619	12.9975	-0.637664	SNX14	sorting nexin 14
ILMN_2207539	0.000347	4.6e-05	-4.2712	1.26901	-0.637012	RPS17	ribosomal protein S17
ILMN_1670453	0.00714	0.00157	-3.255	-2.06349	-0.63644
ILMN_1724066	3.08e-07	1.89e-08	-6.13983	8.82021	-0.636307	PLCB2	phospholipase C beta 2
ILMN_1697460	0.0421	0.0155	-2.46566	-4.14676	-0.636198	REEP6	receptor accessory protein 6
ILMN_1681890	0.000872	0.00013	-3.98909	0.278188	-0.636112	DYNLT3	dynein light chain Tctex-type 3
ILMN_1792587	6.2e-05	6.71e-06	-4.76656	3.11638	-0.635845	VPS4B	vacuolar protein sorting 4 homolog B
ILMN_2296439	2.05e-12	3.54e-14	-8.90318	21.7813	-0.635159	PDE4B	phosphodiesterase 4B
ILMN_1726928	0.00221	0.000386	-3.67983	-0.751918	-0.63464	TCEA3	transcription elongation factor A3
ILMN_1772702	9.47e-06	8.29e-07	-5.27474	5.13779	-0.633089	SRSF8	serine and arginine rich splicing factor 8
ILMN_1760208	3.2e-05	3.2e-06	-4.94932	3.82961	-0.632876	GDAP1L1	ganglioside induced differentiation associated protein 1 like 1
ILMN_1699610	1.57e-13	2.09e-15	-9.47765	24.575	-0.6327	CCT6B	chaperonin containing TCP1 subunit 6B
ILMN_1712918	0.00713	0.00157	-3.25566	-2.06153	-0.632659	NQO2	NAD(P)H quinone dehydrogenase 2
ILMN_1758232	2.73e-05	2.69e-06	-4.99197	3.99832	-0.632314	GGCX	gamma-glutamyl carboxylase
ILMN_2072178	0.0162	0.0044	-2.91775	-3.01259	-0.632187	ECHDC3	enoyl-CoA hydratase domain containing 3
ILMN_1772369	4.69e-06	3.78e-07	-5.45937	5.90015	-0.632118	PDHA1	pyruvate dehydrogenase (lipoamide) alpha 1
ILMN_1679025	6.58e-07	4.36e-08	-5.95303	8.00272	-0.631779
ILMN_2064725	0.00609	0.00129	-3.31664	-1.88099	-0.63167	METTL7B	methyltransferase like 7B
ILMN_1764321	0.00183	0.00031	-3.74401	-0.543186	-0.63111	ACOT4	acyl-CoA thioesterase 4
ILMN_1700025	0.00714	0.00157	-3.25516	-2.06301	-0.630915
ILMN_2052717	9.99e-18	4.57e-20	-11.6662	35.1688	-0.63067	GRAMD1C	GRAM domain containing 1C
ILMN_1809086	2.61e-06	1.98e-07	-5.60959	6.53051	-0.630549	XRN1	5'-3' exoribonuclease 1
ILMN_1765767	3.43e-06	2.67e-07	-5.54	6.23739	-0.630445	ACOX1	acyl-CoA oxidase 1
ILMN_1805228	0.0147	0.0039	-2.95849	-2.90247	-0.630079	LRG1	leucine rich alpha-2-glycoprotein 1
ILMN_1714461	0.00158	0.00026	-3.79384	-0.379251	-0.629924	RNF14	ring finger protein 14
ILMN_1669818	0.000123	1.45e-05	-4.57261	2.37762	-0.629258	ESD	esterase D
ILMN_1679311	5.76e-08	2.93e-09	-6.548	10.6427	-0.62902	STK40	serine/threonine kinase 40
ILMN_1656576	6.03e-08	3.08e-09	-6.53722	10.594	-0.628995	ATCAY	ATCAY, caytaxin
ILMN_1794072	0.00023	2.9e-05	-4.39312	1.71146	-0.628957	B3GAT1	beta-1,3-glucuronyltransferase 1
ILMN_2091375	4.02e-07	2.53e-08	-6.07451	8.53308	-0.628805	KRCC1	lysine rich coiled-coil 1
ILMN_1771019	0.0369	0.0129	-2.53297	-3.98834	-0.62847	MTMR4	myotubularin related protein 4
ILMN_1679666	1.11e-08	4.76e-10	-6.93807	12.4247	-0.62774	SCGB3A1	secretoglobin family 3A member 1
ILMN_1686227	4.52e-08	2.25e-09	-6.60506	10.9011	-0.62766	GNA14	G protein subunit alpha 14
ILMN_1757636	0.000307	4.01e-05	-4.30724	1.39894	-0.627562	SETD9	SET domain containing 9
ILMN_1811551	4.56e-05	4.76e-06	-4.85166	3.44651	-0.627504	DERA	deoxyribose-phosphate aldolase
ILMN_2115005	4.65e-05	4.87e-06	-4.84611	3.42486	-0.62725	FGD2	FYVE, RhoGEF and PH domain containing 2
ILMN_1740960	0.00136	0.000218	-3.84486	-0.209758	-0.626574	MACROD1	MACRO domain containing 1
ILMN_2149204	0.0523	0.0209	-2.34867	-4.41315	-0.625963	RTP3	receptor transporter protein 3
ILMN_1720440	7.39e-09	3.07e-10	-7.03126	12.8555	-0.625371	HELQ	helicase, POLQ-like
ILMN_2404154	6.8e-06	5.74e-07	-5.36141	5.49392	-0.625248	SERPINA1	serpin family A member 1
ILMN_1718863	9.09e-05	1.02e-05	-4.66044	2.7098	-0.625174	KCNK1	potassium two pore domain channel subfamily K member 1
ILMN_1695025	0.00654	0.00141	-3.28962	-1.96131	-0.6247	CD2	CD2 molecule
ILMN_2103295	0.00111	0.000172	-3.91055	0.010866	-0.624143	NSA2	NSA2, ribosome biogenesis homolog
ILMN_1707434	1.59e-07	9.07e-09	-6.30172	9.53742	-0.623608
ILMN_1679587	8.72e-06	7.55e-07	-5.29706	5.22919	-0.623435
ILMN_2061405	8.55e-10	2.87e-11	-7.52869	15.1831	-0.623419	NUP54	nucleoporin 54
ILMN_1661664	4.02e-08	1.98e-09	-6.63318	11.0287	-0.623106
ILMN_1768812	0.000648	9.28e-05	-4.08184	0.598751	-0.622992	FXYD6	FXYD domain containing ion transport regulator 6
ILMN_1708391	0.000239	3.01e-05	-4.38285	1.67385	-0.622366	NR1H4	nuclear receptor subfamily 1 group H member 4
ILMN_1778242	7.62e-07	5.13e-08	-5.91662	7.84469	-0.622236	CALM1	calmodulin 1
ILMN_1787461	7.88e-05	8.73e-06	-4.70054	2.86278	-0.622155	RUNX3	runt related transcription factor 3
ILMN_2379644	0.00366	0.000701	-3.50339	-1.3117	-0.621992	CD74	CD74 molecule
ILMN_1713529	0.0389	0.0139	-2.50559	-4.05325	-0.62084	SEMA6A	semaphorin 6A
ILMN_1704973	0.00594	0.00125	-3.32589	-1.85337	-0.620547	SARDH	sarcosine dehydrogenase
ILMN_2210934	6.19e-12	1.21e-13	-8.65283	20.5676	-0.620259	NR3C2	nuclear receptor subfamily 3 group C member 2
ILMN_1784005	1.48e-07	8.34e-09	-6.31994	9.6186	-0.619953
ILMN_1658494	0.00203	0.00035	-3.7088	-0.65803	-0.619473	RGCC	regulator of cell cycle
ILMN_1754103	0.0027	0.000488	-3.61164	-0.970728	-0.61922	CLDN11	claudin 11
ILMN_1702124	2.4e-06	1.8e-07	-5.63098	6.62097	-0.618913	LNX2	ligand of numb-protein X 2
ILMN_1815705	1.05e-06	7.29e-08	-5.83721	7.50161	-0.618645	LZTFL1	leucine zipper transcription factor like 1
ILMN_1655913	0.00191	0.000326	-3.72915	-0.59174	-0.618305	NUCB2	nucleobindin 2
ILMN_1792323	0.000123	1.44e-05	-4.57336	2.38042	-0.618064	HDC	histidine decarboxylase
ILMN_1779147	0.000677	9.76e-05	-4.06813	0.551036	-0.617568	ENC1	ectodermal-neural cortex 1
ILMN_1710906	1.19e-05	1.06e-06	-5.21568	4.8969	-0.617524	RNF145	ring finger protein 145
ILMN_1702265	7.47e-06	6.37e-07	-5.33689	5.39286	-0.617407	HDHD2	haloacid dehalogenase like hydrolase domain containing 2
ILMN_1716895	0.0156	0.0042	-2.93296	-2.97163	-0.617252	RPA3	replication protein A3
ILMN_1699331	0.0132	0.00341	-3.00354	-2.77923	-0.617203	IFIT1	interferon induced protein with tetratricopeptide repeats 1
ILMN_1677607	0.00242	0.000429	-3.64925	-0.850434	-0.616996	SC5D	sterol-C5-desaturase
ILMN_1768394	0.02	0.00576	-2.82465	-3.25941	-0.616878	ARPC5	actin related protein 2/3 complex subunit 5
ILMN_1748473	0.00286	0.000522	-3.59152	-1.0347	-0.616567	GIMAP4	GTPase, IMAP family member 4
ILMN_2196409	2.52e-06	1.9e-07	-5.61845	6.56793	-0.616418	TPPP2	tubulin polymerization promoting protein family member 2
ILMN_1673478	1.38e-05	1.26e-06	-5.17434	4.72919	-0.616313	FAM13B	family with sequence similarity 13 member B
ILMN_2085922	1.08e-05	9.59e-07	-5.24033	4.99726	-0.616252	WRB	tryptophan rich basic protein
ILMN_1748844	0.000118	1.38e-05	-4.58478	2.42341	-0.616229	CNKSR3	CNKSR family member 3
ILMN_2088124	9.56e-11	2.57e-12	-8.02838	17.5599	-0.61592	TMEM154	transmembrane protein 154
ILMN_1691575	0.00101	0.000154	-3.94277	0.120081	-0.615585	SNX2	sorting nexin 2
ILMN_1777708	6.73e-07	4.47e-08	-5.9477	7.97957	-0.615431	CARMIL3	capping protein regulator and myosin 1 linker 3
ILMN_1772409	3.89e-13	5.57e-15	-9.27871	23.6067	-0.615309	FAHD2A	fumarylacetoacetate hydrolase domain containing 2A
ILMN_2061435	0.0374	0.0132	-2.52565	-4.00576	-0.61523	MEG3	maternally expressed 3 (non-protein coding)
ILMN_1718271	0.000135	1.59e-05	-4.54777	2.28439	-0.613686	MTIF3	mitochondrial translational initiation factor 3
ILMN_2339748	8.84e-06	7.67e-07	-5.29313	5.21307	-0.61287	RNF13	ring finger protein 13
ILMN_1743078	0.00154	0.000252	-3.80271	-0.349894	-0.612863
ILMN_1706817	8e-05	8.88e-06	-4.69623	2.84628	-0.612673	SERP1	stress-associated endoplasmic reticulum protein 1
ILMN_1692261	3.25e-16	2.15e-18	-10.8757	31.3679	-0.61257	EPHB1	EPH receptor B1
ILMN_1740752	1.49e-09	5.29e-11	-7.4012	14.5824	-0.612414	GPAT4	glycerol-3-phosphate acyltransferase 4
ILMN_2058347	3.14e-06	2.42e-07	-5.56316	6.33476	-0.611268	NT5DC1	5'-nucleotidase domain containing 1
ILMN_1688417	0.0029	0.000532	-3.58586	-1.05265	-0.611209	MYL2	myosin light chain 2
ILMN_1793241	0.00705	0.00154	-3.26034	-2.04779	-0.611141	SRD5A1	steroid 5 alpha-reductase 1
ILMN_1776052	0.0299	0.00978	-2.63649	-3.73748	-0.610824
ILMN_1756104	3.03e-09	1.15e-10	-7.23857	13.8201	-0.610412	LARP7	La ribonucleoprotein domain family member 7
ILMN_1697118	0.00193	0.00033	-3.72588	-0.60242	-0.60975	ARMC6	armadillo repeat containing 6
ILMN_1742947	0.00269	0.000486	-3.6128	-0.967027	-0.60915	SEC14L4	SEC14 like lipid binding 4
ILMN_1801044	0.00283	0.000516	-3.59465	-1.02476	-0.60909	DOCK4	dedicator of cytokinesis 4
ILMN_1813572	0.000194	2.4e-05	-4.44205	1.89132	-0.60894	IL16	interleukin 16
ILMN_1729033	0.00194	0.000332	-3.72414	-0.608097	-0.608909	RPL9	ribosomal protein L9
ILMN_1812139	1.34e-11	2.89e-13	-8.47596	19.7125	-0.608765	RASSF2	Ras association domain family member 2
ILMN_2378664	2.17e-09	7.97e-11	-7.31531	14.1793	-0.607457	ERLIN2	ER lipid raft associated 2
ILMN_1750674	0.023	0.00689	-2.76223	-3.42112	-0.606698	SDSL	serine dehydratase like
ILMN_1747622	1.27e-06	8.99e-08	-5.78991	7.29829	-0.606153	CD33	CD33 molecule
ILMN_2196078	0.000126	1.48e-05	-4.56637	2.35414	-0.605645	SLAMF6	SLAM family member 6
ILMN_1678678	0.000174	2.11e-05	-4.47525	2.01411	-0.60558	SLC37A4	solute carrier family 37 member 4
ILMN_1766411	3.36e-05	3.39e-06	-4.93579	3.77625	-0.605494	AP1S2	adaptor related protein complex 1 sigma 2 subunit
ILMN_1670561	0.00165	0.000273	-3.77998	-0.42499	-0.605456	TCEAL8	transcription elongation factor A like 8
ILMN_1665730	0.00595	0.00126	-3.32501	-1.856	-0.605049	ABCB10	ATP binding cassette subfamily B member 10
ILMN_2175465	0.00196	0.000335	-3.72114	-0.617862	-0.604963	RSL24D1	ribosomal L24 domain containing 1
ILMN_1743032	5.59e-06	4.61e-07	-5.41321	5.70827	-0.603983	CTSS	cathepsin S
ILMN_1736162	0.00314	0.000582	-3.55893	-1.13775	-0.603683	GC	GC, vitamin D binding protein
ILMN_1655521	2.36e-06	1.77e-07	-5.63503	6.63807	-0.603638	DMRTA1	DMRT like family A1
ILMN_1759175	8.79e-09	3.69e-10	-6.99213	12.6744	-0.602715	DUSP10	dual specificity phosphatase 10
ILMN_2099259	2.95e-06	2.26e-07	-5.57861	6.39978	-0.60261
ILMN_1769390	2.69e-09	1.01e-10	-7.26527	13.9449	-0.602554	ABHD15	abhydrolase domain containing 15
ILMN_1679826	0.000969	0.000147	-3.95521	0.162407	-0.602045	CST7	cystatin F
ILMN_1802923	0.0048	0.000969	-3.40517	-1.61415	-0.601852	APOC2	apolipoprotein C2
ILMN_1774410	0.0138	0.00359	-2.98607	-2.8272	-0.601788	HSPD1	heat shock protein family D (Hsp60) member 1
ILMN_1661266	0.00723	0.00159	-3.2502	-2.07757	-0.60168	HLA-DQB1	major histocompatibility complex, class II, DQ beta 1
ILMN_1742887	0.00577	0.00121	-3.33665	-1.82114	-0.601368
ILMN_1703330	0.00359	0.000684	-3.51077	-1.2887	-0.601261	FEM1C	fem-1 homolog C
ILMN_1664303	0.0351	0.0121	-2.55736	-3.93003	-0.601193	HTATIP2	HIV-1 Tat interactive protein 2
ILMN_1780349	4.36e-05	4.53e-06	-4.86432	3.49589	-0.600968	TPR	translocated promoter region, nuclear basket protein
ILMN_2323526	0.00125	0.000198	-3.87175	-0.119768	-0.600914	WAC	WW domain containing adaptor with coiled-coil
ILMN_1691507	4.45e-11	1.09e-12	-8.20444	18.4044	-0.599908	CXCR2P1	C-X-C motif chemokine receptor 2 pseudogene 1
ILMN_2067852	2.81e-05	2.77e-06	-4.98458	3.96904	-0.599523	SLC30A1	solute carrier family 30 member 1
ILMN_2179778	4.9e-12	9.27e-14	-8.7074	20.8319	-0.599215	PHLDB2	pleckstrin homology like domain family B member 2
ILMN_1683927	6.72e-06	5.66e-07	-5.36481	5.50796	-0.598791	ITGAE	integrin subunit alpha E
ILMN_1661802	2.05e-05	1.96e-06	-5.06941	4.30685	-0.598772	RAPGEF4	Rap guanine nucleotide exchange factor 4
ILMN_1706326	0.00469	0.00094	-3.41431	-1.5863	-0.598499	MRPL33	mitochondrial ribosomal protein L33
ILMN_1664833	0.018	0.00504	-2.87074	-3.13806	-0.598218	MRPL50	mitochondrial ribosomal protein L50
ILMN_1795495	0.000632	9.02e-05	-4.08968	0.626072	-0.598086	ERCC5	ERCC excision repair 5, endonuclease
ILMN_1695959	3.55e-14	4e-16	-9.81276	26.2069	-0.597309	EVA1C	eva-1 homolog C
ILMN_1751586	6.13e-07	4.02e-08	-5.97163	8.08361	-0.597165
ILMN_2065690	2.12e-05	2.03e-06	-5.06005	4.26942	-0.596843	GRAMD3	GRAM domain containing 3
ILMN_1679428	8.39e-07	5.69e-08	-5.89324	7.74345	-0.596682	CHIC2	cysteine rich hydrophobic domain 2
ILMN_1697220	8.19e-05	9.12e-06	-4.68962	2.82102	-0.596148	NT5E	5'-nucleotidase ecto
ILMN_1674955	0.00515	0.00105	-3.37926	-1.69282	-0.595535	SCP2	sterol carrier protein 2
ILMN_1809433	0.000988	0.00015	-3.94862	0.139987	-0.595017	XBP1	X-box binding protein 1
ILMN_1797776	5.66e-05	6.07e-06	-4.79144	3.21251	-0.594862	PRSS23	protease, serine 23
ILMN_1748650	0.000553	7.77e-05	-4.13038	0.768558	-0.594861	MRPL45	mitochondrial ribosomal protein L45
ILMN_1774823	5.08e-05	5.38e-06	-4.82154	3.32923	-0.594726	RPL34	ribosomal protein L34
ILMN_1674402	2.34e-05	2.26e-06	-5.03409	4.1658	-0.594232	TMEM71	transmembrane protein 71
ILMN_1676372	0.000103	1.18e-05	-4.62379	2.57068	-0.594107	CD209	CD209 molecule
ILMN_1809488	0.00269	0.000485	-3.61299	-0.966438	-0.594069	SPCS2	signal peptidase complex subunit 2
ILMN_1784863	0.019	0.00538	-2.84872	-3.19624	-0.593099	CD36	CD36 molecule
ILMN_1656386	1.56e-09	5.52e-11	-7.39215	14.5399	-0.592801	SEC24D	SEC24 homolog D, COPII coat complex component
ILMN_1715947	0.0164	0.00449	-2.91035	-3.03244	-0.592616
ILMN_1789266	0.000111	1.29e-05	-4.60149	2.4864	-0.591566	CCDC25	coiled-coil domain containing 25
ILMN_2155322	0.00396	0.000768	-3.47605	-1.39657	-0.591088	ZNF652	zinc finger protein 652
ILMN_1681670	0.00334	0.000628	-3.53636	-1.20869	-0.590957	SLC25A4	solute carrier family 25 member 4
ILMN_1658464	0.00317	0.00059	-3.55494	-1.15033	-0.590721	GTF3A	general transcription factor IIIA
ILMN_1801348	0.000435	5.91e-05	-4.20417	1.02937	-0.590704	GOT2	glutamic-oxaloacetic transaminase 2
ILMN_1751559	0.000424	5.75e-05	-4.2117	1.05617	-0.590623	TMEM204	transmembrane protein 204
ILMN_1782729	3.3e-09	1.26e-10	-7.21845	13.7262	-0.589478	CLECL1	C-type lectin like 1
ILMN_1717854	1.2e-07	6.6e-09	-6.37127	9.84784	-0.588952	TRMT11	tRNA methyltransferase 11 homolog
ILMN_1697585	0.0182	0.0051	-2.86724	-3.14733	-0.588545	ACTR6	ARP6 actin-related protein 6 homolog
ILMN_2209748	0.0166	0.00455	-2.90593	-3.04429	-0.588391	DERL1	derlin 1
ILMN_1691611	0.0179	0.00498	-2.87532	-3.12589	-0.587846
ILMN_1662686	1.65e-13	2.2e-15	-9.46708	24.5236	-0.587384	USPL1	ubiquitin specific peptidase like 1
ILMN_1657697	1.4e-07	7.9e-09	-6.3319	9.67195	-0.587195	SAR1A	secretion associated Ras related GTPase 1A
ILMN_2082762	3.27e-06	2.53e-07	-5.55236	6.28932	-0.586957	SNORD68	small nucleolar RNA, C/D box 68
ILMN_1740466	0.000108	1.24e-05	-4.61115	2.52288	-0.586928	FAM46A	family with sequence similarity 46 member A
ILMN_1731001	7.93e-06	6.8e-07	-5.32154	5.3297	-0.586347	ERICH1	glutamate rich 1
ILMN_1771348	3.69e-06	2.9e-07	-5.5212	6.15856	-0.585784	SDHAF3	succinate dehydrogenase complex assembly factor 3
ILMN_1808590	0.00016	1.93e-05	-4.49797	2.0985	-0.584315	GUCY1A3	guanylate cyclase 1 soluble subunit alpha
ILMN_2404850	0.00315	0.000584	-3.55811	-1.14036	-0.5837	RPL14	ribosomal protein L14
ILMN_2397199	1.78e-09	6.42e-11	-7.36074	14.3923	-0.583415	NDEL1	nudE neurodevelopment protein 1 like 1
ILMN_1703487	0.00138	0.000223	-3.83825	-0.231824	-0.583403	LMO4	LIM domain only 4
ILMN_1768534	0.00148	0.000242	-3.81514	-0.308699	-0.583285	BHLHE40	basic helix-loop-helix family member e40
ILMN_1733675	0.000493	6.8e-05	-4.16647	0.895739	-0.583282	MPP1	membrane palmitoylated protein 1
ILMN_1661428	3.1e-11	7.31e-13	-8.28593	18.7963	-0.583266	ATP11C	ATPase phospholipid transporting 11C
ILMN_1659762	0.00321	0.000599	-3.5505	-1.16428	-0.582993	BTF3	basic transcription factor 3
ILMN_2167259	0.0032	0.000596	-3.55203	-1.15949	-0.582948	FAM151A	family with sequence similarity 151 member A
ILMN_1682774	8.68e-06	7.51e-07	-5.29832	5.23435	-0.582763	TEX30	testis expressed 30
ILMN_1802654	8.9e-12	1.82e-13	-8.57037	20.1687	-0.582654	GLT8D2	glycosyltransferase 8 domain containing 2
ILMN_1656625	4.94e-05	5.21e-06	-4.82927	3.35927	-0.582444	RPS24	ribosomal protein S24
ILMN_1654445	3.15e-06	2.43e-07	-5.5619	6.32944	-0.582371
ILMN_1684042	0.000394	5.29e-05	-4.23357	1.13416	-0.58233	BET1	Bet1 golgi vesicular membrane trafficking protein
ILMN_1795507	0.00572	0.0012	-3.33985	-1.81157	-0.582214	ABCA6	ATP binding cassette subfamily A member 6
ILMN_1728779	0.00363	0.000695	-3.5061	-1.30327	-0.582196	NGLY1	N-glycanase 1
ILMN_1691846	0.0334	0.0113	-2.58341	-3.8672	-0.582066	G0S2	G0/G1 switch 2
ILMN_1815292	0.000591	8.36e-05	-4.11057	0.699099	-0.581988	RPL7	ribosomal protein L7
ILMN_1657682	0.0246	0.00755	-2.72986	-3.50376	-0.581933	GFM1	G elongation factor mitochondrial 1
ILMN_1671250	1.88e-05	1.78e-06	-5.09272	4.40022	-0.581589	CLIC4	chloride intracellular channel 4
ILMN_2056167	0.0182	0.00512	-2.86584	-3.15104	-0.58156	OSTC	oligosaccharyltransferase complex non-catalytic subunit
ILMN_1689734	0.00318	0.000591	-3.55457	-1.15149	-0.581399	IL1RN	interleukin 1 receptor antagonist
ILMN_1737396	0.0197	0.00564	-2.83199	-3.24019	-0.580985	PSMD14	proteasome 26S subunit, non-ATPase 14
ILMN_1703314	3.48e-05	3.51e-06	-4.92669	3.74043	-0.580953	KLHL36	kelch like family member 36
ILMN_1763127	0.0166	0.00455	-2.90636	-3.04314	-0.580945	ACKR2	atypical chemokine receptor 2
ILMN_2358647	1.82e-06	1.34e-07	-5.69917	6.91043	-0.580754	FBXO21	F-box protein 21
ILMN_1740005	0.0282	0.00902	-2.66594	-3.66451	-0.580656	SERPINF2	serpin family F member 2
ILMN_2212156	4.66e-06	3.76e-07	-5.46077	5.906	-0.580544	PPIG	peptidylprolyl isomerase G
ILMN_1730731	1.33e-06	9.4e-08	-5.77962	7.25417	-0.58005	ERLIN1	ER lipid raft associated 1
ILMN_1779934	8.54e-06	7.38e-07	-5.30242	5.25116	-0.579586	CDH23	cadherin-related 23
ILMN_1810514	0.0354	0.0122	-2.55378	-3.93861	-0.579266	SLC25A44	solute carrier family 25 member 44
ILMN_1737426	0.0259	0.00804	-2.7071	-3.56137	-0.579162	PCMTD1	protein-L-isoaspartate (D-aspartate) O-methyltransferase domain containing 1
ILMN_1741356	0.0021	0.000364	-3.69744	-0.694921	-0.578624	PRICKLE1	prickle planar cell polarity protein 1
ILMN_1704619	0.0111	0.00273	-3.07702	-2.57491	-0.577224	VPS29	VPS29, retromer complex component
ILMN_1750800	0.000576	8.13e-05	-4.11811	0.725516	-0.577151	ACO1	aconitase 1
ILMN_2157510	0.00437	0.000864	-3.44022	-1.50699	-0.576974	BLOC1S1	biogenesis of lysosomal organelles complex 1 subunit 1
ILMN_1750145	0.00794	0.00179	-3.214	-2.18336	-0.576569	YWHAG	tyrosine 3-monooxygenase/tryptophan 5-monooxygenase activation protein gamma
ILMN_1662026	1.15e-08	5e-10	-6.92776	12.3772	-0.576108	BTK	Bruton tyrosine kinase
ILMN_1717572	8.21e-11	2.15e-12	-8.0643	17.7319	-0.575865	PGA5	pepsinogen 5, group I (pepsinogen A)
ILMN_1697597	0.000962	0.000146	-3.9572	0.169184	-0.575859	EFCAB14	EF-hand calcium binding domain 14
ILMN_1743373	0.000983	0.00015	-3.95028	0.145623	-0.575844	DLL1	delta like canonical Notch ligand 1
ILMN_1788607	2.26e-05	2.18e-06	-5.04293	4.20103	-0.575386	RPL23A	ribosomal protein L23a
ILMN_2134888	2.57e-15	2.19e-17	-10.4026	29.0757	-0.574974	TUBE1	tubulin epsilon 1
ILMN_1718961	3.86e-06	3.04e-07	-5.51005	6.11184	-0.574925	BNIP3L	BCL2 interacting protein 3 like
ILMN_2229261	2.39e-05	2.32e-06	-5.02758	4.13987	-0.574879	SIGLEC16	sialic acid binding Ig like lectin 16 (gene/pseudogene)
ILMN_1735955	0.0125	0.00315	-3.02992	-2.70634	-0.57487
ILMN_1750321	5.98e-05	6.46e-06	-4.77591	3.15249	-0.574775	TRANK1	tetratricopeptide repeat and ankyrin repeat containing 1
ILMN_1809478	0.0291	0.00944	-2.6493	-3.70581	-0.574758	SSBP1	single stranded DNA binding protein 1
ILMN_1691127	0.00188	0.000319	-3.73536	-0.571451	-0.574694	VTN	vitronectin
ILMN_1738546	2.87e-05	2.84e-06	-4.97891	3.94658	-0.573978	KRT16P2	keratin 16 pseudogene 2
ILMN_2247594	0.0115	0.00285	-3.06333	-2.61328	-0.573927	RPLP1	ribosomal protein lateral stalk subunit P1
ILMN_1762605	0.0708	0.0322	-2.17406	-4.78917	-0.573703	SERPINC1	serpin family C member 1
ILMN_1798360	0.00892	0.00206	-3.1683	-2.31554	-0.573334	ACKR3	atypical chemokine receptor 3
ILMN_1705813	0.000372	4.97e-05	-4.25067	1.19536	-0.573284	CFTR	cystic fibrosis transmembrane conductance regulator
ILMN_1736176	0.000871	0.00013	-3.98946	0.279484	-0.573195	PLK1	polo like kinase 1
ILMN_1745217	0.00973	0.0023	-3.13319	-2.41602	-0.573026
ILMN_1747409	1.25e-10	3.43e-12	-7.96857	17.2737	-0.57301	MT1L	metallothionein 1L (gene/pseudogene)
ILMN_2390853	0.00313	0.000582	-3.55941	-1.13624	-0.572475	CTSH	cathepsin H
ILMN_1657087	0.0284	0.0091	-2.66253	-3.67298	-0.572339	ZNF385B	zinc finger protein 385B
ILMN_2216918	1.91e-05	1.81e-06	-5.0884	4.38292	-0.57217	SHPK	sedoheptulokinase
ILMN_2381945	6.81e-05	7.43e-06	-4.74086	3.01739	-0.57189	FGA	fibrinogen alpha chain
ILMN_1803941	4.19e-06	3.34e-07	-5.48829	6.02081	-0.57051	TBC1D15	TBC1 domain family member 15
ILMN_1676448	0.0192	0.00547	-2.84287	-3.21164	-0.569546	WDFY1	WD repeat and FYVE domain containing 1
ILMN_1912185	2.59e-05	2.54e-06	-5.006	4.05404	-0.568866	GPC6	glypican 6
ILMN_1806710	0.0082	0.00186	-3.20132	-2.22019	-0.568575	ESPN	espin
ILMN_1655702	4.82e-06	3.9e-07	-5.45199	5.86943	-0.568486	ABHD5	abhydrolase domain containing 5
ILMN_2087060	0.00424	0.000835	-3.4505	-1.47541	-0.568467	TOMM7	translocase of outer mitochondrial membrane 7
ILMN_1799069	1.39e-10	3.88e-12	-7.94321	17.1525	-0.568423
ILMN_1751904	8.58e-06	7.42e-07	-5.30118	5.24608	-0.567694	EDNRB	endothelin receptor type B
ILMN_1745954	0.00185	0.000313	-3.74118	-0.55242	-0.567678	CORO1C	coronin 1C
ILMN_2227968	0.000605	8.59e-05	-4.10314	0.67311	-0.567513	NTHL1	nth like DNA glycosylase 1
ILMN_1724643	0.00247	0.000439	-3.64236	-0.872536	-0.567486	CD3D	CD3d molecule
ILMN_1758067	0.00586	0.00123	-3.33093	-1.83829	-0.56732	RGS4	regulator of G-protein signaling 4
ILMN_1726597	8.36e-05	9.34e-06	-4.6835	2.79764	-0.566917	FAM65B	family with sequence similarity 65 member B
ILMN_1749834	0.00478	0.000965	-3.40652	-1.61006	-0.566673
ILMN_2279484	1.84e-05	1.73e-06	-5.09916	4.42609	-0.566214	C2orf88	chromosome 2 open reading frame 88
ILMN_1780170	0.000673	9.69e-05	-4.07013	0.558007	-0.566133	APOD	apolipoprotein D
ILMN_1800381	3.14e-10	9.5e-12	-7.75839	16.2716	-0.565904	GNAO1	G protein subunit alpha o1
ILMN_1682910	0.0107	0.00258	-3.09489	-2.52462	-0.56582	SLC35B3	solute carrier family 35 member B3
ILMN_1747935	5.45e-05	5.82e-06	-4.80194	3.25319	-0.565789	GOLGB1	golgin B1
ILMN_1663438	5.3e-06	4.34e-07	-5.4274	5.76716	-0.56557
ILMN_1808494	0.0123	0.00309	-3.03592	-2.6897	-0.564124	ITIH2	inter-alpha-trypsin inhibitor heavy chain 2
ILMN_1886655	0.0523	0.0209	-2.34889	-4.41267	-0.564075
ILMN_1749081	0.019	0.00537	-2.84914	-3.19513	-0.563731	AUTS2	autism susceptibility candidate 2
ILMN_1753975	0.02	0.00577	-2.82444	-3.25995	-0.563286	NPTN	neuroplastin
ILMN_1717674	0.000809	0.000119	-4.01297	0.360231	-0.563015	PEPD	peptidase D
ILMN_1729686	1.88e-15	1.56e-17	-10.4713	29.4091	-0.56293
ILMN_1673933	0.0132	0.00338	-3.00594	-2.77262	-0.562255
ILMN_1797822	0.0368	0.0129	-2.534	-3.98589	-0.561919	SEL1L3	SEL1L family member 3
ILMN_2201678	0.00174	0.000292	-3.76065	-0.488618	-0.561294	FSTL1	follistatin like 1
ILMN_1685387	0.0784	0.0374	-2.11125	-4.91801	-0.56098	PIGR	polymeric immunoglobulin receptor
ILMN_1687652	0.000601	8.51e-05	-4.10556	0.68157	-0.560679	TGFB3	transforming growth factor beta 3
ILMN_1676256	8.46e-08	4.48e-09	-6.45589	10.2274	-0.560452	TPSAB1	tryptase alpha/beta 1
ILMN_1695851	0.000233	2.93e-05	-4.38988	1.6996	-0.559831	PARVG	parvin gamma
ILMN_1684956	0.000359	4.78e-05	-4.26096	1.23226	-0.559804	ARSD	arylsulfatase D
ILMN_1807201	0.0109	0.00264	-3.08791	-2.54431	-0.559644	FAM104A	family with sequence similarity 104 member A
ILMN_1671045	4.48e-10	1.41e-11	-7.6764	15.8821	-0.559443
ILMN_1773741	0.000395	5.32e-05	-4.23236	1.12984	-0.559419	GOLGA5	golgin A5
ILMN_2406532	1.02e-07	5.52e-09	-6.4104	10.0231	-0.559138	F11R	F11 receptor
ILMN_1724207	0.00274	0.000496	-3.60672	-0.986404	-0.559117	IVD	isovaleryl-CoA dehydrogenase
ILMN_1880085	6.03e-06	5.01e-07	-5.39336	5.62598	-0.558764
ILMN_1752589	0.0498	0.0195	-2.37571	-4.3526	-0.558456	TMEM183A	transmembrane protein 183A
ILMN_1689160	8.99e-06	7.82e-07	-5.28864	5.19467	-0.557831	DPEP2	dipeptidase 2
ILMN_1718132	0.000114	1.33e-05	-4.5939	2.45776	-0.557431	ECHS1	enoyl-CoA hydratase, short chain 1
ILMN_1658917	0.00388	0.000751	-3.48285	-1.37552	-0.557279	SLC1A1	solute carrier family 1 member 1
ILMN_1804150	0.000557	7.82e-05	-4.12864	0.762439	-0.557214	HIBADH	3-hydroxyisobutyrate dehydrogenase
ILMN_1801383	4.88e-05	5.15e-06	-4.83254	3.37199	-0.55713	SMG1	SMG1, nonsense mediated mRNA decay associated PI3K related kinase
ILMN_1773245	6.64e-05	7.23e-06	-4.74782	3.04415	-0.55624	CCL3L1	C-C motif chemokine ligand 3 like 1
ILMN_1670821	0.00922	0.00215	-3.15494	-2.35387	-0.555692
ILMN_1654398	0.00235	0.000416	-3.65795	-0.822468	-0.555276	RGL1	ral guanine nucleotide dissociation stimulator like 1
ILMN_1801766	0.00643	0.00138	-3.29579	-1.94302	-0.554777	MCUB	mitochondrial calcium uniporter dominant negative beta subunit
ILMN_2103761	6.17e-07	4.05e-08	-5.96975	8.07545	-0.554579	TLE4	transducin like enhancer of split 4
ILMN_1758213	0.0402	0.0146	-2.4882	-4.09413	-0.554538	GPAM	glycerol-3-phosphate acyltransferase, mitochondrial
ILMN_1702858	0.00274	0.000495	-3.60699	-0.985556	-0.55434	ADHFE1	alcohol dehydrogenase, iron containing 1
ILMN_2323774	4.5e-07	2.86e-08	-6.04726	8.41373	-0.553893
ILMN_1781626	0.00563	0.00117	-3.34616	-1.79262	-0.553893	C1S	complement component 1, s subcomponent
ILMN_1728496	1.15e-11	2.41e-13	-8.51236	19.8883	-0.553282	SYT9	synaptotagmin 9
ILMN_1815345	0.00191	0.000325	-3.73033	-0.5879	-0.553118	EIF3J	eukaryotic translation initiation factor 3 subunit J
ILMN_2067607	5.81e-05	6.25e-06	-4.78421	3.18454	-0.552998	TMEM106B	transmembrane protein 106B
ILMN_1711408	6.41e-13	9.69e-15	-9.16635	23.06	-0.552734	ANXA4	annexin A4
ILMN_1782993	0.00349	0.000663	-3.5201	-1.25959	-0.552499	DHODH	dihydroorotate dehydrogenase (quinone)
ILMN_2329429	6.5e-05	7.06e-06	-4.75364	3.06657	-0.552408
ILMN_2193980	0.0195	0.00556	-2.83741	-3.22598	-0.552403	ABCB6	ATP binding cassette subfamily B member 6 (Langereis blood group)
ILMN_1692199	0.00146	0.000238	-3.81982	-0.293171	-0.552301	RNF103	ring finger protein 103
ILMN_2220518	0.00953	0.00224	-3.14184	-2.39136	-0.55226	LAMTOR5	late endosomal/lysosomal adaptor, MAPK and MTOR activator 5
ILMN_1769288	0.00166	0.000275	-3.77772	-0.432449	-0.552167
ILMN_1653429	0.0188	0.00533	-2.85181	-3.18811	-0.552102	SLC35A3	solute carrier family 35 member A3
ILMN_1713934	0.00483	0.000977	-3.40263	-1.62189	-0.551992	LITAF	lipopolysaccharide induced TNF factor
ILMN_2145116	0.000166	2.02e-05	-4.4873	2.05884	-0.551944	TMEM173	transmembrane protein 173
ILMN_1723412	0.000182	2.23e-05	-4.46121	1.96212	-0.551871	ASCL2	achaete-scute family bHLH transcription factor 2
ILMN_1758811	0.0152	0.00406	-2.94487	-2.93942	-0.551628	IMPA1	inositol monophosphatase 1
ILMN_1689046	1.16e-07	6.37e-09	-6.37905	9.88269	-0.550558	RBM47	RNA binding motif protein 47
ILMN_1804562	0.000531	7.42e-05	-4.14281	0.812287	-0.550159	SLC31A1	solute carrier family 31 member 1
ILMN_2403896	0.00029	3.76e-05	-4.32436	1.46091	-0.55003	GGTLC2	gamma-glutamyltransferase light chain 2
ILMN_2328463	0.00547	0.00113	-3.35711	-1.75968	-0.549822	INS-IGF2	INS-IGF2 readthrough
ILMN_1684017	0.00167	0.000277	-3.7758	-0.438767	-0.549807	GYG2	glycogenin 2
ILMN_1740088	0.00108	0.000167	-3.91976	0.042018	-0.549689
ILMN_2112599	3.64e-06	2.85e-07	-5.52482	6.17374	-0.548882	CFAP20	cilia and flagella associated protein 20
ILMN_2122953	0.00457	0.000911	-3.424	-1.5567	-0.548654	CISD1	CDGSH iron sulfur domain 1
ILMN_1699852	0.0117	0.00291	-3.05582	-2.63429	-0.547526	CES4A	carboxylesterase 4A
ILMN_1698259	0.00125	0.000199	-3.87078	-0.123017	-0.547486	TMEM100	transmembrane protein 100
ILMN_1772207	0.00421	0.000828	-3.45314	-1.46728	-0.547312
ILMN_2230862	0.0205	0.00596	-2.81329	-3.28907	-0.546935	GYG1	glycogenin 1
ILMN_1730816	0.00093	0.00014	-3.96855	0.207916	-0.546855	GPR162	G protein-coupled receptor 162
ILMN_2399304	0.00723	0.00159	-3.2503	-2.07728	-0.546701	NAV2	neuron navigator 2
ILMN_1730082	0.00284	0.000519	-3.5934	-1.02874	-0.546376	RPUSD4	RNA pseudouridylate synthase domain containing 4
ILMN_2358277	1.69e-05	1.58e-06	-5.12088	4.51339	-0.546371	RSRC2	arginine and serine rich coiled-coil 2
ILMN_1701837	8.35e-10	2.8e-11	-7.53413	15.2088	-0.546005	KLHL2	kelch like family member 2
ILMN_1728660	0.00301	0.000556	-3.57299	-1.0934	-0.545761	PMPCB	peptidase, mitochondrial processing beta subunit
ILMN_1805271	0.0035	0.000666	-3.51892	-1.2633	-0.545535	ZNF721	zinc finger protein 721
ILMN_2116556	0.0307	0.0101	-2.6256	-3.76427	-0.54467	LSM5	LSM5 homolog, U6 small nuclear RNA and mRNA degradation associated
ILMN_1659696	1.17e-06	8.19e-08	-5.81089	7.38837	-0.544569
ILMN_1857968	7.64e-06	6.53e-07	-5.33108	5.36891	-0.544518
ILMN_1752199	0.0199	0.0057	-2.82828	-3.24992	-0.544454	LHPP	phospholysine phosphohistidine inorganic pyrophosphate phosphatase
ILMN_2084825	0.000166	2.01e-05	-4.48808	2.06173	-0.544225	HBG2	hemoglobin subunit gamma 2
ILMN_1694325	0.0134	0.00347	-2.99735	-2.79624	-0.544208	NFIX	nuclear factor I X
ILMN_2106658	0.00142	0.000229	-3.83082	-0.256567	-0.54402	BLZF1	basic leucine zipper nuclear factor 1
ILMN_1782938	0.00315	0.000586	-3.55697	-1.14394	-0.544014	SLC16A10	solute carrier family 16 member 10
ILMN_1664068	1.55e-06	1.11e-07	-5.74097	7.08871	-0.543612	ERGIC1	endoplasmic reticulum-golgi intermediate compartment 1
ILMN_1677396	0.000112	1.31e-05	-4.59866	2.47571	-0.542988	NDFIP2	Nedd4 family interacting protein 2
ILMN_1749244	2.18e-05	2.1e-06	-5.0519	4.23686	-0.54286	LYRM1	LYR motif containing 1
ILMN_1654861	0.00118	0.000184	-3.89151	-0.053367	-0.542276	ACO2	aconitase 2
ILMN_1808226	0.005	0.00102	-3.39024	-1.65955	-0.542176	RGS16	regulator of G-protein signaling 16
ILMN_2091846	0.000249	3.17e-05	-4.36973	1.62591	-0.541998
ILMN_1699931	0.00424	0.000834	-3.45082	-1.47441	-0.540799	HCST	hematopoietic cell signal transducer
ILMN_1654766	5.8e-13	8.65e-15	-9.18938	23.172	-0.540793	SLC9B2	solute carrier family 9 member B2
ILMN_1660111	0.000639	9.14e-05	-4.08615	0.613779	-0.540645	UCHL3	ubiquitin C-terminal hydrolase L3
ILMN_1810941	0.0242	0.00737	-2.73807	-3.48288	-0.54049	COMT	catechol-O-methyltransferase
ILMN_1660232	0.00922	0.00215	-3.15483	-2.35419	-0.540355	PEX5	peroxisomal biogenesis factor 5
ILMN_2312817	4.08e-11	9.93e-13	-8.22325	18.4948	-0.540101
ILMN_1670925	9.33e-08	5e-09	-6.43171	10.1188	-0.53993	CYB5D1	cytochrome b5 domain containing 1
ILMN_2328666	3.03e-05	3.01e-06	-4.96421	3.88844	-0.539473	CD83	CD83 molecule
ILMN_1686645	9.31e-05	1.05e-05	-4.65364	2.68394	-0.539384	UTP14C	UTP14, small subunit processome component homolog C (S. cerevisiae)
ILMN_1688279	4.4e-06	3.52e-07	-5.47573	5.96838	-0.539161	PVRIG	poliovirus receptor related immunoglobulin domain containing
ILMN_1798395	0.000163	1.97e-05	-4.49292	2.07972	-0.538919	PIGH	phosphatidylinositol glycan anchor biosynthesis class H
ILMN_1664369	0.000578	8.16e-05	-4.11701	0.721648	-0.53888	DHTKD1	dehydrogenase E1 and transketolase domain containing 1
ILMN_1665982	6.13e-06	5.12e-07	-5.38837	5.60535	-0.53883	AKTIP	AKT interacting protein
ILMN_1667081	0.000225	2.82e-05	-4.40014	1.73719	-0.538513	CCND2	cyclin D2
ILMN_1770085	0.0255	0.00791	-2.71317	-3.54605	-0.538138	BTG2	BTG anti-proliferation factor 2
ILMN_1751368	0.000183	2.24e-05	-4.45998	1.95755	-0.53781	HNRNPD	heterogeneous nuclear ribonucleoprotein D
ILMN_1794190	2.7e-07	1.63e-08	-6.173	8.96651	-0.537695	CCPG1	cell cycle progression 1
ILMN_2094587	1.02e-06	7.04e-08	-5.84525	7.53626	-0.537321	USP8	ubiquitin specific peptidase 8
ILMN_1764168	0.00272	0.000491	-3.60964	-0.977104	-0.536821	STXBP3	syntaxin binding protein 3
ILMN_1731891	5.98e-12	1.16e-13	-8.66123	20.6083	-0.536561	UBXN8	UBX domain protein 8
ILMN_2172269	0.0627	0.027	-2.24587	-4.63768	-0.536258	TMEM183B	transmembrane protein 183B
ILMN_1802653	0.000656	9.42e-05	-4.07794	0.585161	-0.53615	EBI3	Epstein-Barr virus induced 3
ILMN_1808939	0.00454	0.000904	-3.42627	-1.54974	-0.53597	RPS6	ribosomal protein S6
ILMN_1746856	0.00835	0.0019	-3.1938	-2.24197	-0.535814	RAB21	RAB21, member RAS oncogene family
ILMN_1673491	1.21e-14	1.19e-16	-10.0591	27.4061	-0.535462	LRAT	lecithin retinol acyltransferase (phosphatidylcholine--retinol O-acyltransferase)
ILMN_1799535	0.00211	0.000366	-3.69595	-0.699736	-0.53536	GJB1	gap junction protein beta 1
ILMN_1676822	4.49e-07	2.85e-08	-6.048	8.41695	-0.53534	C2orf40	chromosome 2 open reading frame 40
ILMN_1811632	0.0355	0.0123	-2.55217	-3.94248	-0.534659	FMO5	flavin containing monooxygenase 5
ILMN_1710284	5.83e-05	6.28e-06	-4.78315	3.18048	-0.534173	HES1	hes family bHLH transcription factor 1
ILMN_1663919	0.00546	0.00113	-3.35744	-1.75871	-0.533849	TFF2	trefoil factor 2
ILMN_1792150	0.00111	0.000173	-3.9098	0.008346	-0.533408	ALOX5	arachidonate 5-lipoxygenase
ILMN_1715680	9.62e-05	1.09e-05	-4.64438	2.64876	-0.532639	NEIL2	nei like DNA glycosylase 2
ILMN_1732705	0.0602	0.0255	-2.26984	-4.58615	-0.532284	HCFC1	host cell factor C1
ILMN_2165289	1.64e-05	1.52e-06	-5.12933	4.54742	-0.5318	DEFA3	defensin alpha 3
ILMN_1752728	1.44e-06	1.02e-07	-5.76034	7.17156	-0.531324	FUCA1	fucosidase, alpha-L- 1, tissue
ILMN_1682098	0.000739	0.000108	-4.04066	0.455797	-0.531108	PSMA4	proteasome subunit alpha 4
ILMN_1668996	0.00101	0.000154	-3.94206	0.117658	-0.530944	C1QBP	complement C1q binding protein
ILMN_1673795	0.00272	0.000493	-3.60857	-0.980507	-0.530602	HSD17B4	hydroxysteroid 17-beta dehydrogenase 4
ILMN_1785852	0.0122	0.00306	-3.03904	-2.68104	-0.53057	NABP1	nucleic acid binding protein 1
ILMN_1811592	0.0198	0.00567	-2.83034	-3.24452	-0.530543	ARHGAP21	Rho GTPase activating protein 21
ILMN_2359096	3.53e-10	1.08e-11	-7.73145	16.1435	-0.530262	SS18	SS18, nBAF chromatin remodeling complex subunit
ILMN_1687291	1.91e-09	6.92e-11	-7.34498	14.3184	-0.529619	CDNF	cerebral dopamine neurotrophic factor
ILMN_1756525	0.000648	9.3e-05	-4.08147	0.597471	-0.52916	KLHL20	kelch like family member 20
ILMN_1804569	6.56e-06	5.52e-07	-5.37091	5.53316	-0.528949	GAS2	growth arrest specific 2
ILMN_1815107	0.00147	0.000239	-3.81819	-0.298556	-0.528926	MATR3	matrin 3
ILMN_1679194	0.0131	0.00335	-3.00958	-2.76259	-0.528648
ILMN_1665945	0.0599	0.0253	-2.27239	-4.58063	-0.528609	ACBD3	acyl-CoA binding domain containing 3
ILMN_1760227	9.67e-07	6.66e-08	-5.85772	7.59001	-0.527875
ILMN_1776151	0.00865	0.00199	-3.18014	-2.28141	-0.527622	OLFML1	olfactomedin like 1
ILMN_1824490	6.06e-05	6.56e-06	-4.77231	3.13858	-0.527564
ILMN_1795557	0.0209	0.00607	-2.80651	-3.30672	-0.52742
ILMN_1721106	0.000654	9.39e-05	-4.07874	0.58795	-0.526561	C14orf159	chromosome 14 open reading frame 159
ILMN_2147471	0.0011	0.000172	-3.9119	0.015435	-0.526409	PI4K2B	phosphatidylinositol 4-kinase type 2 beta
ILMN_1857915	0.0221	0.00654	-2.78054	-3.374	-0.526327
ILMN_1719351	1.88e-15	1.57e-17	-10.4705	29.405	-0.525643	TCF21	transcription factor 21
ILMN_2148469	0.00769	0.00172	-3.22576	-2.14909	-0.525215	RASL11B	RAS like family 11 member B
ILMN_1656940	0.00636	0.00136	-3.30031	-1.92959	-0.524882	ABLIM3	actin binding LIM protein family member 3
ILMN_1767642	0.000295	3.84e-05	-4.31914	1.44202	-0.524654	ARL14EP	ADP ribosylation factor like GTPase 14 effector protein
ILMN_1693717	1.15e-05	1.03e-06	-5.22287	4.92615	-0.524623	RPH3AL	rabphilin 3A-like (without C2 domains)
ILMN_1740633	0.0122	0.00307	-3.03773	-2.68468	-0.524605	PRF1	perforin 1
ILMN_1683888	0.000242	3.06e-05	-4.37831	1.65725	-0.52426	SRP72	signal recognition particle 72
ILMN_2225144	0.00241	0.000428	-3.64971	-0.848946	-0.523729	EIF4E3	eukaryotic translation initiation factor 4E family member 3
ILMN_1739259	1.79e-05	1.68e-06	-5.10643	4.45527	-0.522798	UBE4A	ubiquitination factor E4A
ILMN_1673543	0.00174	0.000292	-3.7612	-0.486802	-0.522718	PGM2	phosphoglucomutase 2
ILMN_1734895	0.00491	0.000997	-3.39646	-1.64066	-0.522685	SFT2D1	SFT2 domain containing 1
ILMN_1815154	0.00146	0.000238	-3.81958	-0.293941	-0.522468	MYH10	myosin, heavy chain 10, non-muscle
ILMN_1691789	5.11e-06	4.16e-07	-5.43703	5.80717	-0.522358	SMNDC1	survival motor neuron domain containing 1
ILMN_1750256	0.000136	1.62e-05	-4.54412	2.27073	-0.522317	ALS2	ALS2, alsin Rho guanine nucleotide exchange factor
ILMN_1719696	0.00218	0.000379	-3.68531	-0.734205	-0.522222	PLD1	phospholipase D1
ILMN_1718069	0.000319	4.18e-05	-4.29645	1.35997	-0.521727	MIS12	MIS12, kinetochore complex component
ILMN_2052373	0.0343	0.0117	-2.56973	-3.90026	-0.521621	RAB17	RAB17, member RAS oncogene family
[truncated: 16,508 more rows]
