# Supplementary material for: Centromere protein N may be a novel malignant prognostic biomarker for hepatocellular carcinoma
Source: PeerJ. 2021 May 3;9:e11342. doi: 10.7717/peerj.11342 (PMC8101454; doi:10.7717/peerj.11342)
Supplement: File S4 [file peerj-09-11342-s014.xlsx]

## Sheet: Normal vs HCC_GSE112790
ID	adj.P.Val	P.Value	t	B	logFC	Gene.symbol	Gene.title
1559573_at	9.61e-26	2.11e-29	-13.3426	55.8432	-5.3751	LINC01093	long intergenic non-protein coding RNA 1093
220491_at	5.94e-13	1.95e-15	-8.63319	24.5425	-5.14738	HAMP	hepcidin antimicrobial peptide
217546_at	2.42e-12	9.52e-15	-8.38182	22.999	-5.07405	MT1M	metallothionein 1M
223699_at	4.63e-19	3.05e-22	-10.9877	39.7967	-4.83495	CNDP1	carnosine dipeptidase 1
207608_x_at	5.58e-12	2.54e-14	-8.2246	22.0443	-4.55112	CYP1A2	cytochrome P450 family 1 subfamily A member 2
222484_s_at	9.4e-25	2.41e-28	-12.9981	53.4756	-4.45707	CXCL14	C-X-C motif chemokine ligand 14
207804_s_at	2.76e-30	3.03e-34	-14.9194	66.6756	-4.3886	FCN2	ficolin 2
220116_at	2.42e-27	4.42e-31	-13.8892	59.6017	-4.28917	KCNN2	potassium calcium-activated channel subfamily N member 2
206354_at	3.76e-07	1.11e-08	-5.96406	9.47009	-4.12415	SLCO1B3	solute carrier organic anion transporter family member 1B3
210233_at	2.59e-23	8.06e-27	-12.5	50.0601	-4.11426	IL1RAP	interleukin 1 receptor accessory protein
238835_at	1.01e-09	1.05e-11	-7.22573	16.199	-4.03333	AVPR1A	arginine vasopressin receptor 1A
205866_at	3.07e-17	2.81e-20	-10.3257	35.3905	-4.02563	FCN3	ficolin 3
216058_s_at	2.09e-44	3.83e-49	-19.8972	99.8052	-3.98449	CYP2C19	cytochrome P450 family 2 subfamily C member 19
230577_at	2.7e-06	1.16e-07	-5.50117	7.22125	-3.97639	LINC00844	long intergenic non-protein coding RNA 844
1559065_a_at	2.12e-31	1.55e-35	-15.3408	69.5585	-3.96072	CLEC4G	C-type lectin domain family 4 member G
220496_at	3.09e-27	6.22e-31	-13.8409	59.2696	-3.92548	CLEC1B	C-type lectin domain family 1 member B
205984_at	2.45e-19	1.48e-22	-11.0927	40.501	-3.91631	CRHBP	corticotropin releasing hormone binding protein
207262_at	1.7e-10	1.36e-12	-7.57173	18.1779	-3.87973	APOF	apolipoprotein F
207609_s_at	3.66e-15	6.1e-18	-9.52231	30.1537	-3.84344	CYP1A2	cytochrome P450 family 1 subfamily A member 2
230478_at	1.43e-20	7.31e-24	-11.527	43.431	-3.83563	OIT3	oncoprotein induced transcript 3
242680_at	2.17e-08	3.69e-10	-6.59925	12.7556	-3.82143	AVPR1A	arginine vasopressin receptor 1A
213629_x_at	1.68e-13	4.49e-16	-8.86285	25.9703	-3.77094	MT1F	metallothionein 1F
207201_s_at	1.01e-05	5.57e-07	-5.17465	5.71511	-3.74567	SLC22A1	solute carrier family 22 member 1
202768_at	2.87e-23	1.05e-26	-12.4623	49.8022	-3.7311	FOSB	FosB proto-oncogene, AP-1 transcription factor subunit
206727_at	1.98e-05	1.27e-06	-4.99846	4.93139	-3.72213	C9	complement component 9
218002_s_at	1.85e-21	8.47e-25	-11.8362	45.5296	-3.69006	CXCL14	C-X-C motif chemokine ligand 14
223784_at	7.29e-12	3.58e-14	-8.16965	21.7127	-3.68511	TMEM27	transmembrane protein 27
237350_at	4.12e-14	9.65e-17	-9.10072	27.4657	-3.65216	TTC36	tetratricopeptide repeat domain 36
207584_at	2.19e-15	3.23e-18	-9.61844	30.7729	-3.63706	LPA	lipoprotein(a)
207995_s_at	1.44e-43	5.29e-48	-19.5042	97.2831	-3.60726	CLEC4M	C-type lectin domain family 4 member M
220432_s_at	9.13e-08	2.07e-09	-6.28228	11.0885	-3.51205	CYP39A1	cytochrome P450 family 39 subfamily A member 1
235642_at	1.25e-11	6.61e-14	-8.07029	21.1159	-3.49328
232449_at	1.78e-14	3.75e-17	-9.24576	28.3852	-3.4706	BCO2	beta-carotene oxygenase 2
210524_x_at	2.37e-15	3.64e-18	-9.60006	30.6543	-3.40995
237390_at	8.81e-10	8.92e-12	-7.25362	16.3565	-3.37166	ADRA1A	adrenoceptor alpha 1A
207330_at	7.45e-28	1.23e-31	-14.0704	60.8471	-3.37125	PZP	PZP, alpha-2-macroglobulin like
204428_s_at	1.45e-13	3.77e-16	-8.88997	26.14	-3.35936	LCAT	lecithin-cholesterol acyltransferase
237765_at	2.3e-10	1.9e-12	-7.51648	17.8585	-3.32752	SLC25A47	solute carrier family 25 member 47
209189_at	2.75e-12	1.11e-14	-8.3569	22.8471	-3.31472	FOS	Fos proto-oncogene, AP-1 transcription factor subunit
1568765_at	2.9e-18	2.12e-21	-10.7053	37.9087	-3.30299	SERPINE1	serpin family E member 1
210328_at	2.97e-07	8.4e-09	-6.01796	9.74016	-3.26174	GNMT	glycine N-methyltransferase
225316_at	3.64e-11	2.26e-13	-7.86973	19.9224	-3.23356	MFSD2A	major facilitator superfamily domain containing 2A
239380_at	1.08e-06	3.91e-08	-5.7184	8.26049	-3.23307	LINC01554	long intergenic non-protein coding RNA 1554
244562_s_at	4.72e-13	1.47e-15	-8.67738	24.816	-3.21925
229777_at	1.97e-06	7.94e-08	-5.57708	7.5811	-3.21782	CLRN3	clarin 3
207027_at	4.41e-10	3.94e-12	-7.39276	17.1478	-3.20374	HGFAC	HGF activator
1431_at	0.0018	0.000309	-3.67279	-0.25195	-3.20284	CYP2E1	cytochrome P450 family 2 subfamily E member 1
206424_at	4.02e-17	4.12e-20	-10.2694	35.0193	-3.18651	CYP26A1	cytochrome P450 family 26 subfamily A member 1
217165_x_at	9.83e-11	7.11e-13	-7.68042	18.81	-3.18619	MT1F	metallothionein 1F
202409_at	0.000672	9.28e-05	-3.99033	0.86876	-3.17941	INS-IGF2///IGF2	INS-IGF2 readthrough///insulin like growth factor 2
215014_at	3.21e-12	1.32e-14	-8.32949	22.6803	-3.16233	KCND3	potassium voltage-gated channel subfamily D member 3
205531_s_at	7.28e-07	2.43e-08	-5.81217	8.71801	-3.158	GLS2	glutaminase 2
209976_s_at	0.00138	0.000222	-3.7613	0.05237	-3.14551	CYP2E1	cytochrome P450 family 2 subfamily E member 1
220801_s_at	2.48e-07	6.84e-09	-6.05723	9.93803	-3.14529	HAO2	hydroxyacid oxidase 2
206797_at	5.77e-10	5.48e-12	-7.33678	16.8285	-3.1415	NAT2	N-acetyltransferase 2
202238_s_at	3.1e-06	1.36e-07	-5.4683	7.06658	-3.13786	LOC101928916///NNMT	uncharacterized LOC101928916///nicotinamide N-methyltransferase
204745_x_at	3.62e-10	3.12e-12	-7.43255	17.3757	-3.09089	MT1G	metallothionein 1G
205225_at	7.04e-09	1.01e-10	-6.83144	14.0097	-3.09007	ESR1	estrogen receptor 1
218532_s_at	2.1e-07	5.6e-09	-6.09511	10.1297	-3.08378	FAM134B	family with sequence similarity 134 member B
218510_x_at	1.55e-07	3.88e-09	-6.1645	10.4829	-3.04584	FAM134B	family with sequence similarity 134 member B
205999_x_at	5.12e-05	4.06e-06	-4.74046	3.82194	-3.04397	CYP3A4	cytochrome P450 family 3 subfamily A member 4
211295_x_at	2.53e-05	1.71e-06	-4.93308	4.64591	-3.04022	CYP2A6	cytochrome P450 family 2 subfamily A member 6
207102_at	3.99e-05	3e-06	-4.80858	4.11039	-3.0157	AKR1D1	aldo-keto reductase family 1, member D1
206755_at	1.41e-08	2.25e-10	-6.68778	13.2306	-3.00791	CYP2B6	cytochrome P450 family 2 subfamily B member 6
205433_at	2.92e-06	1.26e-07	-5.48308	7.13605	-3.00651	BCHE	butyrylcholinesterase
214621_at	9.04e-06	4.87e-07	-5.20329	5.84445	-3.00372	GYS2	glycogen synthase 2
208367_x_at	1.42e-05	8.51e-07	-5.08435	5.31085	-2.99767	CYP3A4	cytochrome P450 family 3 subfamily A member 4
1564706_s_at	3.59e-06	1.62e-07	-5.43212	6.89704	-2.98863	GLS2	glutaminase 2
1494_f_at	4.65e-05	3.61e-06	-4.76689	3.93346	-2.9535	CYP2A6	cytochrome P450 family 2 subfamily A member 6
220794_at	8.82e-10	8.94e-12	-7.25322	16.3543	-2.93221	GREM2	gremlin 2, DAN family BMP antagonist
217319_x_at	2.09e-07	5.58e-09	-6.09591	10.1337	-2.91515	CYP4A22///CYP4A11	cytochrome P450 family 4 subfamily A member 22///cytochrome P450 family 4 subfamily A member 11
231678_s_at	0.00099	0.000149	-3.86827	0.42853	-2.90972	ADH4	alcohol dehydrogenase 4 (class II), pi polypeptide
204326_x_at	9.33e-09	1.4e-10	-6.77287	13.6908	-2.89234	MT1X	metallothionein 1X
209774_x_at	3.54e-07	1.03e-08	-5.97875	9.5435	-2.89138	CXCL2	C-X-C motif chemokine ligand 2
219954_s_at	1.33e-06	4.96e-08	-5.67139	8.03316	-2.88672	GBA3	glucosylceramidase beta 3 (gene/pseudogene)
205753_at	0.00175	0.000298	-3.68232	-0.21948	-2.88564	CRP	C-reactive protein, pentraxin-related
203914_x_at	0.000318	3.72e-05	-4.21979	1.72753	-2.865	HPGD	hydroxyprostaglandin dehydrogenase 15-(NAD)
209687_at	2.41e-07	6.62e-09	-6.06333	9.96885	-2.85567	CXCL12	C-X-C motif chemokine ligand 12
222943_at	2.45e-05	1.65e-06	-4.94092	4.67998	-2.8556	GBA3	glucosylceramidase beta 3 (gene/pseudogene)
211548_s_at	0.000254	2.84e-05	-4.28605	1.98297	-2.85354	HPGD	hydroxyprostaglandin dehydrogenase 15-(NAD)
213832_at	1.45e-09	1.6e-11	-7.15278	15.7884	-2.84824	KCND3	potassium voltage-gated channel subfamily D member 3
210143_at	6.67e-09	9.44e-11	-6.84291	14.0723	-2.84652	ANXA10	annexin A10
214320_x_at	9.28e-05	8.37e-06	-4.57541	3.13671	-2.84592	CYP2A6	cytochrome P450 family 2 subfamily A member 6
204704_s_at	5.48e-05	4.41e-06	-4.72179	3.74348	-2.82994	ALDOB	aldolase, fructose-bisphosphate B
205554_s_at	1.68e-09	1.93e-11	-7.12071	15.6088	-2.81798	DNASE1L3	deoxyribonuclease 1 like 3
210481_s_at	1.04e-38	5.73e-43	-17.7968	86.1173	-2.81097	CLEC4M	C-type lectin domain family 4 member M
205998_x_at	2.86e-07	8.04e-09	-6.02639	9.78255	-2.80576	CYP3A4	cytochrome P450 family 3 subfamily A member 4
211896_s_at	2.61e-05	1.78e-06	-4.92383	4.60577	-2.78419	DCN	decorin
225575_at	9.89e-11	7.19e-13	-7.67855	18.7991	-2.77951	LIFR	leukemia inhibitory factor receptor alpha
209614_at	4.61e-05	3.58e-06	-4.7691	3.94281	-2.77285	ADH1B	alcohol dehydrogenase 1B (class I), beta polypeptide
204301_at	3.97e-17	3.93e-20	-10.2764	35.0656	-2.76352	KBTBD11	kelch repeat and BTB domain containing 11
37020_at	0.0054	0.0012	-3.28756	-1.50208	-2.75927	CRP	C-reactive protein, pentraxin-related
211489_at	7.37e-19	5.13e-22	-10.9123	39.2911	-2.75915	ADRA1A	adrenoceptor alpha 1A
207407_x_at	1.66e-06	6.47e-08	-5.61809	7.77702	-2.75906	CYP4A11	cytochrome P450 family 4 subfamily A member 11
212859_x_at	3e-07	8.49e-09	-6.01593	9.72999	-2.7555	MT1E	metallothionein 1E
206461_x_at	5.09e-09	6.93e-11	-6.89758	14.3718	-2.7387	MT1H	metallothionein 1H
208383_s_at	9.73e-05	8.88e-06	-4.56175	3.08085	-2.73842	PCK1	phosphoenolpyruvate carboxykinase 1
1553296_at	1.74e-16	1.95e-19	-10.0392	33.5079	-2.7224	ADGRG7	adhesion G protein-coupled receptor G7
209541_at	9.99e-07	3.55e-08	-5.73772	8.35432	-2.72107	IGF1	insulin like growth factor 1
211231_x_at	4.24e-12	1.86e-14	-8.2744	22.3458	-2.7185	CYP4A11	cytochrome P450 family 4 subfamily A member 11
222083_at	1.37e-05	8.13e-07	-5.09423	5.35483	-2.71318	GLYAT	glycine-N-acyltransferase
233604_at	7.84e-08	1.73e-09	-6.31626	11.2647	-2.70588	FLJ22763	uncharacterized LOC401081
224244_s_at	3.46e-08	6.43e-10	-6.49803	12.2175	-2.69959	APOA5	apolipoprotein A5
243146_at	1.91e-22	7.68e-26	-12.1792	47.8664	-2.69148
218976_at	4.15e-06	1.93e-07	-5.39628	6.72996	-2.67419	DNAJC12	DnaJ heat shock protein family (Hsp40) member C12
205695_at	5.49e-05	4.42e-06	-4.72152	3.74235	-2.67363	SDS	serine dehydratase
208581_x_at	2.32e-08	3.98e-10	-6.5853	12.6811	-2.67129	MT1X	metallothionein 1X
242817_at	2.15e-05	1.4e-06	-4.97727	4.83854	-2.66842	PGLYRP2	peptidoglycan recognition protein 2
203372_s_at	4.23e-10	3.77e-12	-7.40062	17.1928	-2.66477	SOCS2	suppressor of cytokine signaling 2
230135_at	3.57e-18	2.68e-21	-10.6711	37.6806	-2.65722	HHIP	hedgehog interacting protein
224997_x_at	9.19e-05	8.27e-06	-4.57825	3.14832	-2.65298	MIR675///H19	microRNA 675///H19, imprinted maternally expressed transcript (non-protein coding)
230707_at	2.06e-14	4.37e-17	-9.22229	28.236	-2.64785	SORL1	sortilin related receptor 1
236699_at	2.52e-12	9.95e-15	-8.37486	22.9565	-2.64739
205363_at	0.000118	1.13e-05	-4.50621	2.85519	-2.64571	BBOX1	gamma-butyrobetaine hydroxylase 1
1561886_a_at	1.9e-17	1.6e-20	-10.409	35.9412	-2.64247
206754_s_at	5.51e-06	2.71e-07	-5.32603	6.40484	-2.63641	CYP2B7P///CYP2B6	cytochrome P450 family 2 subfamily B member 7, pseudogene///cytochrome P450 family 2 subfamily B member 6
210377_at	1.01e-09	1.06e-11	-7.22445	16.1918	-2.63002	ACSM3	acyl-CoA synthetase medium-chain family member 3
206030_at	2.71e-14	5.8e-17	-9.17882	27.9601	-2.62519	ASPA	aspartoacylase
1554459_s_at	3.56e-05	2.61e-06	-4.83993	4.24425	-2.60273	CFHR3	complement factor H related 3
232369_at	3.23e-12	1.33e-14	-8.32792	22.6707	-2.595
206643_at	0.000406	5.01e-05	-4.14613	1.44745	-2.58302	HAL	histidine ammonia-lyase
223781_x_at	5.71e-05	4.65e-06	-4.71012	3.69454	-2.58262	ADH4	alcohol dehydrogenase 4 (class II), pi polypeptide
231691_at	2.25e-06	9.28e-08	-5.54556	7.43126	-2.57215	C3P1	complement component 3 precursor pseudogene
205844_at	0.000537	7.06e-05	-4.05993	1.12497	-2.56844	VNN1	vanin 1
232978_at	5.16e-15	9.64e-18	-9.4528	29.7074	-2.56575
209540_at	2.42e-06	1.01e-07	-5.52813	7.34863	-2.56542	IGF1	insulin like growth factor 1
236067_at	1.23e-11	6.44e-14	-8.07458	21.1416	-2.56168
202917_s_at	4.08e-06	1.89e-07	-5.40012	6.74785	-2.55974	S100A8	S100 calcium binding protein A8
219014_at	6.2e-09	8.62e-11	-6.85895	14.16	-2.55913	PLAC8	placenta specific 8
209960_at	3.9e-08	7.44e-10	-6.47142	12.0769	-2.5527	HGF	hepatocyte growth factor
202237_at	0.000105	9.79e-06	-4.53888	2.98767	-2.55103	LOC101928916///NNMT	uncharacterized LOC101928916///nicotinamide N-methyltransferase
206840_at	2.31e-05	1.53e-06	-4.95765	4.75285	-2.53889	AFM	afamin
203913_s_at	0.00114	0.000176	-3.82409	0.27208	-2.53739	HPGD	hydroxyprostaglandin dehydrogenase 15-(NAD)
216336_x_at	1.77e-08	2.96e-10	-6.63882	12.9674	-2.53502	MT1E	metallothionein 1E
231156_at	5.77e-07	1.84e-08	-5.86603	8.98314	-2.5284	HAO2	hydroxyacid oxidase 2
202628_s_at	5.06e-09	6.89e-11	-6.89865	14.3776	-2.52552	SERPINE1	serpin family E member 1
243296_at	1.13e-07	2.68e-09	-6.23425	10.8407	-2.5157	NAMPT	nicotinamide phosphoribosyltransferase
232138_at	1.27e-09	1.37e-11	-7.18014	15.9421	-2.51282	MBNL2	muscleblind like splicing regulator 2
205307_s_at	9.1e-10	9.26e-12	-7.24723	16.3204	-2.49795	KMO	kynurenine 3-monooxygenase (kynurenine 3-hydroxylase)
209470_s_at	2e-15	2.87e-18	-9.63626	30.8879	-2.49737	GPM6A	glycoprotein M6A
225571_at	1.19e-11	6.22e-14	-8.08027	21.1757	-2.49604	LIFR	leukemia inhibitory factor receptor alpha
1558549_s_at	1.04e-05	5.83e-07	-5.16511	5.67215	-2.48897	VNN1	vanin 1
214421_x_at	7.11e-05	6.1e-06	-4.64825	3.43671	-2.48363	CYP2C9	cytochrome P450 family 2 subfamily C member 9
227554_at	2.84e-10	2.38e-12	-7.47786	17.636	-2.4811	MAGI2-AS3	MAGI2 antisense RNA 3
1570228_at	2.04e-23	5.97e-27	-12.5428	50.3531	-2.47962	CFHR3	complement factor H related 3
207874_s_at	0.000105	9.74e-06	-4.54014	2.99277	-2.47011	CFHR4	complement factor H related 4
209975_at	0.00611	0.00139	-3.2425	-1.64027	-2.46355	CYP2E1	cytochrome P450 family 2 subfamily E member 1
1553977_a_at	1.06e-09	1.11e-11	-7.21662	16.1476	-2.46252	CYP39A1	cytochrome P450 family 39 subfamily A member 1
201893_x_at	4.91e-05	3.87e-06	-4.75167	3.8692	-2.45668	DCN	decorin
201599_at	1.26e-05	7.34e-07	-5.11594	5.45164	-2.45422	OAT	ornithine aminotransferase
235945_at	9.28e-10	9.5e-12	-7.24285	16.2956	-2.44444
215712_s_at	3.98e-20	2.13e-23	-11.3732	42.3907	-2.44287	IGFALS	insulin like growth factor binding protein acid labile subunit
209696_at	2.05e-09	2.42e-11	-7.08132	15.3887	-2.43116	FBP1	fructose-bisphosphatase 1
206938_at	3.74e-09	4.87e-11	-6.95943	14.7123	-2.42958	SRD5A2	steroid 5 alpha-reductase 2
207718_x_at	2.54e-06	1.07e-07	-5.51624	7.29243	-2.42869	CYP2A7	cytochrome P450 family 2 subfamily A member 7
209116_x_at	1.15e-07	2.73e-09	-6.23049	10.8213	-2.42188	HBB	hemoglobin subunit beta
205442_at	1.29e-05	7.55e-07	-5.10996	5.42496	-2.41494	MFAP3L	microfibrillar associated protein 3 like
207244_x_at	8.04e-06	4.25e-07	-5.23183	5.97388	-2.41478	CYP2A6	cytochrome P450 family 2 subfamily A member 6
208147_s_at	0.000644	8.79e-05	-4.00416	0.91936	-2.40955	CYP2C8	cytochrome P450 family 2 subfamily C member 8
1568638_a_at	3.99e-12	1.75e-14	-8.28477	22.4087	-2.40112	IDO2	indoleamine 2,3-dioxygenase 2
216025_x_at	5.41e-05	4.34e-06	-4.72548	3.75897	-2.39085	CYP2C9	cytochrome P450 family 2 subfamily C member 9
243713_at	4.52e-11	2.89e-13	-7.82937	19.6841	-2.38702
219934_s_at	1.12e-06	4.06e-08	-5.711	8.22462	-2.37383	SULT1E1	sulfotransferase family 1E member 1
209365_s_at	1.88e-24	5.16e-28	-12.8901	52.7342	-2.37063	ECM1	extracellular matrix protein 1
205498_at	6.39e-06	3.23e-07	-5.28935	6.23636	-2.37062	GHR	growth hormone receptor
202145_at	8.88e-09	1.32e-10	-6.78329	13.7474	-2.36908	LY6E	lymphocyte antigen 6 complex, locus E
217133_x_at	7.22e-17	7.66e-20	-10.1775	34.415	-2.36206	CYP2B6	cytochrome P450 family 2 subfamily B member 6
230120_s_at	9.04e-07	3.15e-08	-5.76135	8.46938	-2.35943	PLGLB1///PLGLB2	plasminogen-like B1///plasminogen-like B2
217521_at	2.17e-05	1.41e-06	-4.97469	4.82728	-2.35696	HAL	histidine ammonia-lyase
220017_x_at	5.38e-05	4.31e-06	-4.72722	3.76626	-2.3568	CYP2C9	cytochrome P450 family 2 subfamily C member 9
224646_x_at	0.00203	0.000359	-3.63148	-0.39181	-2.35639	MIR675///H19	microRNA 675///H19, imprinted maternally expressed transcript (non-protein coding)
220037_s_at	4.62e-14	1.1e-16	-9.08049	27.3378	-2.35571	LYVE1	lymphatic vessel endothelial hyaluronan receptor 1
203373_at	3.22e-09	4.11e-11	-6.98912	14.8764	-2.34975	SOCS2	suppressor of cytokine signaling 2
223593_at	1.99e-16	2.29e-19	-10.0147	33.3475	-2.34762	AADAT	aminoadipate aminotransferase
216661_x_at	1.3e-05	7.61e-07	-5.10843	5.4181	-2.34285	CYP2C9	cytochrome P450 family 2 subfamily C member 9
232494_at	0.00204	0.000361	-3.62949	-0.3985	-2.33534	CYP8B1	cytochrome P450 family 8 subfamily B member 1
202410_x_at	0.00371	0.000752	-3.423	-1.07652	-2.3347	INS-IGF2///IGF2	INS-IGF2 readthrough///insulin like growth factor 2
231683_at	5.06e-08	1.01e-09	-6.41462	11.7781	-2.33445	GLYAT	glycine-N-acyltransferase
225491_at	0.00179	0.000308	-3.6731	-0.25089	-2.33257	SLC1A2	solute carrier family 1 member 2
1558603_at	5.23e-13	1.67e-15	-8.65756	24.6932	-2.32636	PLGLB2	plasminogen-like B2
211303_x_at	1.51e-08	2.45e-10	-6.67299	13.151	-2.32473	FOLH1B	folate hydrolase 1B
212724_at	1.29e-12	4.76e-15	-8.49191	23.6724	-2.32286	RND3	Rho family GTPase 3
205942_s_at	7.45e-09	1.08e-10	-6.81942	13.9441	-2.32246	ACSM3	acyl-CoA synthetase medium-chain family member 3
227794_at	1.96e-05	1.25e-06	-5.0012	4.94343	-2.31904	LOC100287413///GLYATL1	uncharacterized LOC100287413///glycine-N-acyltransferase like 1
219059_s_at	9.94e-16	1.29e-18	-9.75619	31.664	-2.3128	LYVE1	lymphatic vessel endothelial hyaluronan receptor 1
207218_at	0.00144	0.000236	-3.7456	-0.00205	-2.30698	F9	coagulation factor IX
205541_s_at	6.49e-06	3.3e-07	-5.28495	6.2162	-2.30505	GSPT2	G1 to S phase transition 2
1555612_s_at	1.82e-05	1.15e-06	-5.01996	5.02591	-2.30148	G6PC	glucose-6-phosphatase catalytic subunit
213664_at	0.000486	6.23e-05	-4.09156	1.24264	-2.29853	SLC1A1	solute carrier family 1 member 1
217558_at	0.000576	7.67e-05	-4.03898	1.04744	-2.29815	CYP2C9	cytochrome P450 family 2 subfamily C member 9
1555345_at	4.75e-05	3.72e-06	-4.76067	3.90721	-2.29739	SLC38A4	solute carrier family 38 member 4
1560469_at	2.03e-11	1.13e-13	-7.98379	20.5993	-2.29504	NR5A2	nuclear receptor subfamily 5 group A member 2
230931_at	1.43e-05	8.57e-07	-5.08275	5.30374	-2.28987	PLG	plasminogen
211456_x_at	1.12e-08	1.72e-10	-6.73676	13.4951	-2.28982	MT1HL1	metallothionein 1H-like 1
202992_at	0.000421	5.22e-05	-4.13573	1.40826	-2.28747	C7	complement component 7
205819_at	3.97e-17	3.85e-20	-10.2794	35.0856	-2.28567	MARCO	macrophage receptor with collagenous structure
223427_s_at	4.8e-09	6.5e-11	-6.90876	14.4332	-2.2855	EPB41L4B	erythrocyte membrane protein band 4.1 like 4B
214478_at	0.0003	3.46e-05	-4.23736	1.79495	-2.28427	SPP2	secreted phosphoprotein 2
206753_at	6.43e-06	3.26e-07	-5.28749	6.22784	-2.276	RDH16	retinol dehydrogenase 16 (all-trans)
204719_at	0.000612	8.28e-05	-4.01961	0.97607	-2.26996	ABCA8	ATP binding cassette subfamily A member 8
211813_x_at	2.39e-05	1.6e-06	-4.94801	4.71087	-2.26845	DCN	decorin
235592_at	1.05e-06	3.79e-08	-5.72459	8.29055	-2.26496
1555175_a_at	1.81e-07	4.65e-09	-6.13069	10.3105	-2.26378	PBLD	phenazine biosynthesis like protein domain containing
203434_s_at	0.0013	0.000207	-3.78053	0.11935	-2.26337	MME	membrane metallo-endopeptidase
217127_at	1.01e-05	5.58e-07	-5.17446	5.71423	-2.25877	CTH	cystathionine gamma-lyase
207041_at	7.26e-07	2.42e-08	-5.81295	8.72182	-2.2538	MASP2	mannan binding lectin serine peptidase 2
235737_at	1.23e-07	2.94e-09	-6.21665	10.7501	-2.25208	TSLP	thymic stromal lymphopoietin
221590_s_at	2.68e-09	3.33e-11	-7.02628	15.0824	-2.24589	ALDH6A1	aldehyde dehydrogenase 6 family member A1
205384_at	1.38e-05	8.15e-07	-5.09373	5.35259	-2.23932	FXYD1	FXYD domain containing ion transport regulator 1
237716_at	1.6e-10	1.27e-12	-7.58399	18.249	-2.23635
214415_at	1.87e-05	1.19e-06	-5.01261	4.99356	-2.23048	PLGLB1///PLGLB2	plasminogen-like B1///plasminogen-like B2
211138_s_at	2.21e-06	9.08e-08	-5.54996	7.45213	-2.22703	KMO	kynurenine 3-monooxygenase (kynurenine 3-hydroxylase)
208370_s_at	1.22e-12	4.48e-15	-8.50164	23.7321	-2.22609	RCAN1	regulator of calcineurin 1
206085_s_at	1.27e-05	7.39e-07	-5.11465	5.44588	-2.22209	CTH	cystathionine gamma-lyase
230406_at	3.1e-09	3.94e-11	-6.99656	14.9176	-2.21953
1569203_at	1.42e-16	1.56e-19	-10.0717	33.7205	-2.21719	CXCL2	C-X-C motif chemokine ligand 2
220878_at	0.000353	4.24e-05	-4.18726	1.60334	-2.21034
218918_at	7.89e-10	7.78e-12	-7.2772	16.49	-2.20834	MAN1C1	mannosidase alpha class 1C member 1
205249_at	3.04e-13	8.62e-16	-8.76089	25.3344	-2.20704	EGR2	early growth response 2
205306_x_at	2.07e-06	8.4e-08	-5.56579	7.52736	-2.20431	KMO	kynurenine 3-monooxygenase (kynurenine 3-hydroxylase)
208607_s_at	0.00484	0.00104	-3.32845	-1.37522	-2.20348	SAA2-SAA4///SAA2///SAA1	SAA2-SAA4 readthrough///serum amyloid A2///serum amyloid A1
227174_at	0.000262	2.94e-05	-4.27689	1.94749	-2.20065	WDR72	WD repeat domain 72
209305_s_at	2.06e-09	2.44e-11	-7.08029	15.383	-2.19904	GADD45B	growth arrest and DNA damage inducible beta
206007_at	2.46e-05	1.66e-06	-4.93964	4.67444	-2.19661	PRG4	proteoglycan 4
218541_s_at	2.42e-08	4.2e-10	-6.57567	12.6298	-2.19369	C8orf4	chromosome 8 open reading frame 4
210168_at	4.48e-05	3.45e-06	-4.77717	3.97699	-2.19122	C6	complement component 6
223721_s_at	3.31e-06	1.47e-07	-5.45226	6.99131	-2.18568	DNAJC12	DnaJ heat shock protein family (Hsp40) member C12
222303_at	1.12e-07	2.64e-09	-6.23714	10.8555	-2.1847
204289_at	1.05e-14	2.09e-17	-9.33495	28.9534	-2.18293	ALDH6A1	aldehyde dehydrogenase 6 family member A1
209469_at	2.6e-12	1.04e-14	-8.36828	22.9164	-2.18174	GPM6A	glycoprotein M6A
215078_at	2.61e-05	1.78e-06	-4.92429	4.60777	-2.18094	LOC100129518///SOD2	uncharacterized LOC100129518///superoxide dismutase 2, mitochondrial
206930_at	0.000419	5.19e-05	-4.1371	1.41341	-2.17993	GLYAT	glycine-N-acyltransferase
240509_s_at	1.68e-09	1.93e-11	-7.12094	15.6101	-2.17101	GREM2	gremlin 2, DAN family BMP antagonist
206119_at	0.000263	2.96e-05	-4.27591	1.94367	-2.16729	BHMT	betaine--homocysteine S-methyltransferase
217996_at	6.2e-07	2.02e-08	-5.84854	8.89683	-2.16582	PHLDA1	pleckstrin homology like domain family A member 1
204999_s_at	0.000244	2.7e-05	-4.29757	2.02773	-2.1657	ATF5	activating transcription factor 5
211696_x_at	3.76e-07	1.11e-08	-5.9646	9.47277	-2.16529	HBB	hemoglobin subunit beta
206024_at	0.009	0.00224	-3.09648	-2.07623	-2.16247	HPD	4-hydroxyphenylpyruvate dioxygenase
212143_s_at	5.09e-08	1.02e-09	-6.41308	11.77	-2.15851	IGFBP3	insulin like growth factor binding protein 3
207185_at	0.00149	0.000246	-3.73457	-0.04019	-2.14475	SLC10A1	solute carrier family 10 member 1
217232_x_at	1.31e-07	3.18e-09	-6.20208	10.6753	-2.14131	HBB	hemoglobin subunit beta
204955_at	4.09e-06	1.9e-07	-5.39946	6.74476	-2.14063	SRPX	sushi repeat containing protein, X-linked
225516_at	7.8e-07	2.64e-08	-5.79618	8.63961	-2.14038	SLC7A2	solute carrier family 7 member 2
209335_at	7.96e-05	6.95e-06	-4.61816	3.31231	-2.1318	DCN	decorin
202627_s_at	1.36e-06	5.09e-08	-5.66613	8.00782	-2.13011	SERPINE1	serpin family E member 1
205773_at	4.34e-12	1.91e-14	-8.27019	22.3203	-2.1271	CPEB3	cytoplasmic polyadenylation element binding protein 3
205404_at	0.00928	0.00233	-3.08501	-2.10971	-2.12365	HSD11B1	hydroxysteroid 11-beta dehydrogenase 1
201693_s_at	1.39e-05	8.25e-07	-5.09111	5.34092	-2.12151	EGR1	early growth response 1
217022_s_at	0.00125	0.000198	-3.79247	0.16106	-2.11816	IGHA2///IGHA1///IGH	immunoglobulin heavy constant alpha 2 (A2m marker)///immunoglobulin heavy constant alpha 1///immunoglobulin heavy locus
229476_s_at	0.0204	0.00616	-2.76878	-2.98782	-2.11753	THRSP	thyroid hormone responsive
207409_at	0.00589	0.00133	-3.25617	-1.59853	-2.10638	LECT2	leukocyte cell derived chemotaxin 2
228186_s_at	1.25e-11	6.72e-14	-8.06756	21.0996	-2.10571	RSPO3	R-spondin 3
226225_at	4.34e-06	2.04e-07	-5.38444	6.67494	-2.1053	MCC	mutated in colorectal cancers
215363_x_at	8.82e-07	3.06e-08	-5.76691	8.49651	-2.1009	FOLH1B///FOLH1	folate hydrolase 1B///folate hydrolase (prostate-specific membrane antigen) 1
206210_s_at	8.52e-11	5.92e-13	-7.71092	18.9883	-2.0955	CETP	cholesteryl ester transfer protein
226181_at	5.83e-12	2.7e-14	-8.21504	21.9866	-2.09332	TUBE1	tubulin epsilon 1
229831_at	8.5e-05	7.52e-06	-4.60019	3.23832	-2.08996	CNTN3	contactin 3
217997_at	2.43e-06	1.01e-07	-5.52772	7.34673	-2.08689	PHLDA1	pleckstrin homology like domain family A member 1
207773_x_at	1.47e-06	5.6e-08	-5.64721	7.91674	-2.08599	CYP3A43	cytochrome P450 family 3 subfamily A member 43
211699_x_at	4.52e-08	8.8e-10	-6.44063	11.9147	-2.08331	HBA2///HBA1	hemoglobin subunit alpha 2///hemoglobin subunit alpha 1
212185_x_at	1.91e-07	4.97e-09	-6.11772	10.2445	-2.08151	MT2A	metallothionein 2A
222940_at	7.69e-05	6.67e-06	-4.62765	3.3515	-2.08092	SULT1E1	sulfotransferase family 1E member 1
207574_s_at	6.49e-09	9.14e-11	-6.84869	14.1039	-2.07903	GADD45B	growth arrest and DNA damage inducible beta
227404_s_at	2.34e-05	1.55e-06	-4.95453	4.73927	-2.07826	EGR1	early growth response 1
238619_at	7.4e-07	2.48e-08	-5.80832	8.69908	-2.07474
232428_at	1.7e-05	1.05e-06	-5.03866	5.1084	-2.07442	MOGAT2	monoacylglycerol O-acyltransferase 2
213006_at	3.01e-07	8.53e-09	-6.01492	9.72487	-2.07329	CEBPD	CCAAT/enhancer binding protein delta
205860_x_at	1.33e-06	4.93e-08	-5.67242	8.03814	-2.07091	FOLH1B///FOLH1	folate hydrolase 1B///folate hydrolase (prostate-specific membrane antigen) 1
213931_at	1.45e-09	1.6e-11	-7.15307	15.7901	-2.06602	ID2B///ID2	inhibitor of DNA binding 2B, HLH protein (pseudogene)///inhibitor of DNA binding 2, HLH protein
244026_at	1.44e-05	8.66e-07	-5.08053	5.29386	-2.06228
205913_at	1.8e-12	6.77e-15	-8.43605	23.3302	-2.05768	PLIN1	perilipin 1
206068_s_at	3.32e-05	2.39e-06	-4.85958	4.32847	-2.05709	ACADL	acyl-CoA dehydrogenase, long chain
209458_x_at	7.41e-08	1.62e-09	-6.32859	11.3288	-2.05665	HBA2///HBA1	hemoglobin subunit alpha 2///hemoglobin subunit alpha 1
231311_at	1.69e-08	2.78e-10	-6.65012	13.028	-2.05642
239331_at	2.77e-07	7.75e-09	-6.03323	9.81699	-2.05488
231790_at	6.55e-06	3.33e-07	-5.28283	6.2065	-2.05439	DMGDH	dimethylglycine dehydrogenase
214142_at	1.04e-07	2.41e-09	-6.25373	10.9411	-2.05189	ZG16	zymogen granule protein 16
231982_at	4.69e-06	2.24e-07	-5.36571	6.58809	-2.0463	SMIM24	small integral membrane protein 24
1559577_at	8.76e-31	8.02e-35	-15.1079	67.9662	-2.04546	FCN2	ficolin 2
228325_at	8.3e-08	1.84e-09	-6.30408	11.2015	-2.04439	SPIDR	scaffolding protein involved in DNA repair
206305_s_at	8.53e-07	2.94e-08	-5.7748	8.53505	-2.04391	C8A	complement component 8 alpha subunit
236796_at	9.1e-11	6.46e-13	-7.69625	18.9025	-2.042
214829_at	1.13e-05	6.44e-07	-5.14384	5.57658	-2.03891	AASS	aminoadipate-semialdehyde synthase
240038_at	1.67e-05	1.03e-06	-5.04322	5.12853	-2.03789
219410_at	0.000841	0.000122	-3.9199	0.61329	-2.03633	TMEM45A	transmembrane protein 45A
228469_at	4.34e-11	2.74e-13	-7.83796	19.7347	-2.03072	PPID	peptidylprolyl isomerase D
230425_at	2.62e-23	8.65e-27	-12.4901	49.9921	-2.02897	EPHB1	EPH receptor B1
238003_at	0.000122	1.17e-05	-4.49704	2.81818	-2.02888	HEPN1///HEPACAM	hepatocellular carcinoma, down-regulated 1///hepatic and glial cell adhesion molecule
209531_at	2.23e-09	2.69e-11	-7.06323	15.2879	-2.02882	GSTZ1	glutathione S-transferase zeta 1
232017_at	1.22e-08	1.91e-10	-6.71748	13.3908	-2.02859	TJP2	tight junction protein 2
205871_at	0.000433	5.4e-05	-4.12744	1.37704	-2.02805	PLGLB1///PLGLB2	plasminogen-like B1///plasminogen-like B2
220604_x_at	3.68e-07	1.08e-08	-5.9696	9.49773	-2.02768	FTCD	formimidoyltransferase cyclodeaminase
214734_at	0.000352	4.22e-05	-4.18881	1.60926	-2.02264	EXPH5	exophilin 5
205799_s_at	0.00787	0.0019	-3.1482	-1.92387	-2.0216	SLC3A1	solute carrier family 3 member 1
203131_at	0.000598	8.05e-05	-4.02681	1.00255	-2.01732	PDGFRA	platelet derived growth factor receptor alpha
214420_s_at	2.62e-08	4.63e-10	-6.5581	12.5362	-2.01004	CYP2C9	cytochrome P450 family 2 subfamily C member 9
230233_at	1.24e-07	2.96e-09	-6.21552	10.7443	-2.00956
225557_at	2.15e-17	1.87e-20	-10.3861	35.7895	-1.99455	CSRNP1	cysteine and serine rich nuclear protein 1
204018_x_at	7.49e-08	1.63e-09	-6.32647	11.3178	-1.99286	HBA2///HBA1	hemoglobin subunit alpha 2///hemoglobin subunit alpha 1
224299_x_at	5.67e-07	1.8e-08	-5.87077	9.00654	-1.99249	FTCD	formimidoyltransferase cyclodeaminase
241255_at	3.5e-16	4.1e-19	-9.92796	32.781	-1.99159	CTNNA3	catenin alpha 3
224300_x_at	6.66e-07	2.19e-08	-5.83222	8.8165	-1.98362	FTCD	formimidoyltransferase cyclodeaminase
210881_s_at	0.00807	0.00195	-3.13885	-1.95157	-1.979	INS-IGF2///IGF2	INS-IGF2 readthrough///insulin like growth factor 2
210764_s_at	6.22e-07	2.03e-08	-5.84728	8.89061	-1.97891	CYR61	cysteine rich angiogenic inducer 61
211745_x_at	3.69e-07	1.08e-08	-5.96898	9.49468	-1.97877	HBA2///HBA1	hemoglobin subunit alpha 2///hemoglobin subunit alpha 1
213929_at	0.000379	4.62e-05	-4.16644	1.52427	-1.97747	EXPH5	exophilin 5
205440_s_at	2.81e-11	1.68e-13	-7.9181	20.2088	-1.9743	NPY1R	neuropeptide Y receptor Y1
213632_at	2.31e-11	1.32e-13	-7.95762	20.4435	-1.97369	DHODH	dihydroorotate dehydrogenase (quinone)
241994_at	0.000137	1.35e-05	-4.46408	2.68553	-1.97301	XDH	xanthine dehydrogenase
205478_at	0.00033	3.91e-05	-4.20772	1.68138	-1.96629	PPP1R1A	protein phosphatase 1 regulatory inhibitor subunit 1A
1554640_at	4.86e-10	4.42e-12	-7.37334	17.0369	-1.96557	PALM2	paralemmin 2
217564_s_at	0.00764	0.00183	-3.15991	-1.88908	-1.96442	CPS1	carbamoyl-phosphate synthase 1
214414_x_at	9.77e-07	3.46e-08	-5.7428	8.37905	-1.96099	HBA2///HBA1	hemoglobin subunit alpha 2///hemoglobin subunit alpha 1
217414_x_at	2.52e-07	6.96e-09	-6.05387	9.92104	-1.9528	HBA2///HBA1	hemoglobin subunit alpha 2///hemoglobin subunit alpha 1
1555434_a_at	4.97e-08	9.87e-10	-6.4197	11.8048	-1.9525	SLC39A14	solute carrier family 39 member 14
57539_at	1.17e-09	1.24e-11	-7.19682	16.036	-1.95019	ZGPAT///LIME1	zinc finger CCCH-type and G-patch domain containing///Lck interacting transmembrane adaptor 1
209304_x_at	4.21e-10	3.73e-12	-7.40239	17.2029	-1.94329	GADD45B	growth arrest and DNA damage inducible beta
217014_s_at	1.88e-06	7.46e-08	-5.58951	7.64037	-1.94178	AZGP1P1///AZGP1	alpha-2-glycoprotein 1, zinc-binding pseudogene 1///alpha-2-glycoprotein 1, zinc-binding
204224_s_at	5.47e-10	5.16e-12	-7.34719	16.8878	-1.94133	GCH1	GTP cyclohydrolase 1
207096_at	0.00054	7.12e-05	-4.05782	1.11714	-1.94048	SAA2-SAA4///SAA4	SAA2-SAA4 readthrough///serum amyloid A4, constitutive
221848_at	4.86e-10	4.43e-12	-7.37303	17.0351	-1.93859	ZGPAT	zinc finger CCCH-type and G-patch domain containing
219543_at	1.26e-05	7.34e-07	-5.11595	5.45169	-1.9377	PBLD	phenazine biosynthesis like protein domain containing
206898_at	1.48e-06	5.67e-08	-5.64447	7.90356	-1.93735	CDH19	cadherin 19
203666_at	1.15e-08	1.78e-10	-6.73031	13.4602	-1.93712	CXCL12	C-X-C motif chemokine ligand 12
220528_at	1.39e-06	5.19e-08	-5.66206	7.98819	-1.93702	VNN3	vanin 3
213355_at	4.4e-09	5.9e-11	-6.92593	14.5276	-1.93575	ST3GAL6	ST3 beta-galactoside alpha-2,3-sialyltransferase 6
204920_at	0.00562	0.00125	-3.27323	-1.54622	-1.93559	CPS1	carbamoyl-phosphate synthase 1
235915_at	6.1e-06	3.06e-07	-5.30091	6.28939	-1.93292
1565863_at	7.5e-10	7.29e-12	-7.28814	16.552	-1.93134
202973_x_at	1.46e-05	8.76e-07	-5.07813	5.28319	-1.92993	FAM13A	family with sequence similarity 13 member A
227695_at	1.15e-07	2.75e-09	-6.22975	10.8175	-1.92243	LOC100287413///GLYATL1	uncharacterized LOC100287413///glycine-N-acyltransferase like 1
230688_at	2.09e-12	8.03e-15	-8.40895	23.1645	-1.92092
211577_s_at	1.92e-06	7.66e-08	-5.58426	7.61534	-1.91987	IGF1	insulin like growth factor 1
237127_at	4.97e-08	9.88e-10	-6.41938	11.8031	-1.9168
215253_s_at	4.06e-13	1.26e-15	-8.70205	24.9689	-1.91644	RCAN1	regulator of calcineurin 1
211442_x_at	3.13e-06	1.37e-07	-5.46611	7.05627	-1.91214	CYP3A43	cytochrome P450 family 3 subfamily A member 43
223979_x_at	3.33e-07	9.61e-09	-5.99217	9.61071	-1.91019	FTCD	formimidoyltransferase cyclodeaminase
220186_s_at	7.29e-12	3.54e-14	-8.17118	21.722	-1.91005	CDHR2	cadherin related family member 2
241897_at	5.91e-06	2.94e-07	-5.30905	6.32675	-1.9082
206732_at	4.12e-18	3.17e-21	-10.6465	37.5171	-1.90713	SLITRK3	SLIT and NTRK like family member 3
210521_s_at	0.00683	0.00159	-3.20107	-1.76578	-1.90708	FETUB	fetuin B
206069_s_at	3.49e-06	1.56e-07	-5.43928	6.93053	-1.90571	ACADL	acyl-CoA dehydrogenase, long chain
223702_x_at	3.18e-07	9.15e-09	-6.00152	9.65764	-1.90562	FTCD	formimidoyltransferase cyclodeaminase
207255_at	4.06e-07	1.22e-08	-5.94689	9.3844	-1.90508	LEPROT///LEPR	leptin receptor overlapping transcript///leptin receptor
202286_s_at	6.39e-05	5.33e-06	-4.67894	3.56428	-1.90419	TACSTD2	tumor-associated calcium signal transducer 2
219277_s_at	1.53e-05	9.28e-07	-5.06574	5.22819	-1.89362	OGDHL	oxoglutarate dehydrogenase-like
204748_at	8.52e-11	5.93e-13	-7.71049	18.9858	-1.89351	PTGS2	prostaglandin-endoperoxide synthase 2
243706_at	5.3e-08	1.08e-09	-6.40359	11.7203	-1.89114	CDO1	cysteine dioxygenase type 1
229477_at	0.0154	0.00437	-2.88294	-2.68085	-1.88889	THRSP	thyroid hormone responsive
224243_at	2.42e-08	4.18e-10	-6.5765	12.6342	-1.88768	APOA5	apolipoprotein A5
205227_at	3.21e-12	1.32e-14	-8.3292	22.6786	-1.88463	IL1RAP	interleukin 1 receptor accessory protein
220070_at	6.94e-15	1.33e-17	-9.40341	29.391	-1.88181	KDM8	lysine demethylase 8
219733_s_at	4.59e-05	3.56e-06	-4.77032	3.94797	-1.88158	SLC27A5	solute carrier family 27 member 5
206680_at	2.69e-07	7.49e-09	-6.03979	9.85003	-1.87887	CD5L	CD5 molecule like
220114_s_at	1.65e-25	3.92e-29	-13.2552	55.2418	-1.87845	STAB2	stabilin 2
203908_at	0.00081	0.000116	-3.93182	0.65628	-1.87773	SLC4A4	solute carrier family 4 member 4
201044_x_at	1.05e-07	2.45e-09	-6.25089	10.9264	-1.87514	DUSP1	dual specificity phosphatase 1
219343_at	8.2e-11	5.66e-13	-7.71822	19.031	-1.8748	CDC37L1	cell division cycle 37 like 1
1553962_s_at	5.85e-07	1.88e-08	-5.86275	8.9669	-1.87472	RHOB	ras homolog family member B
205943_at	0.00293	0.000564	-3.5053	-0.81046	-1.87357	TDO2	tryptophan 2,3-dioxygenase
240110_at	6.78e-07	2.24e-08	-5.8281	8.79625	-1.87242	HMGCS2	3-hydroxy-3-methylglutaryl-CoA synthase 2
227771_at	3.56e-13	1.05e-15	-8.73011	25.1431	-1.87147	LIFR	leukemia inhibitory factor receptor alpha
212657_s_at	2.14e-07	5.73e-09	-6.09096	10.1086	-1.8705	IL1RN	interleukin 1 receptor antagonist
228728_at	3.07e-06	1.34e-07	-5.47081	7.07832	-1.86858	CPED1	cadherin like and PC-esterase domain containing 1
204483_at	1.63e-05	1e-06	-5.04949	5.15627	-1.86569	ENO3	enolase 3
228844_at	0.000724	0.000102	-3.96727	0.7847	-1.86172	SLC13A5	solute carrier family 13 member 5
204438_at	2.15e-06	8.8e-08	-5.55635	7.4825	-1.86077	MRC1	mannose receptor, C type 1
222666_s_at	1.49e-08	2.42e-10	-6.67536	13.1637	-1.85617	RCL1	RNA terminal phosphate cyclase like 1
242626_at	1.03e-06	3.69e-08	-5.72982	8.31593	-1.85007	SAMD5	sterile alpha motif domain containing 5
33494_at	1.09e-09	1.15e-11	-7.20954	16.1077	-1.84971	ETFDH	electron transfer flavoprotein dehydrogenase
204998_s_at	0.000343	4.09e-05	-4.19623	1.63749	-1.84769	ATF5	activating transcription factor 5
218544_s_at	5.14e-10	4.76e-12	-7.36085	16.9656	-1.84541	RCL1	RNA terminal phosphate cyclase like 1
227361_at	2.58e-05	1.76e-06	-4.92674	4.61838	-1.84529	HS3ST3B1	heparan sulfate-glucosamine 3-sulfotransferase 3B1
215206_at	5.81e-05	4.75e-06	-4.70542	3.67485	-1.84227
224839_s_at	2.61e-07	7.25e-09	-6.04607	9.88169	-1.84153	GPT2	glutamic--pyruvic transaminase 2
221139_s_at	8.78e-07	3.04e-08	-5.76828	8.5032	-1.8396	CSAD	cysteine sulfinic acid decarboxylase
225767_at	1.45e-07	3.59e-09	-6.17924	10.5583	-1.83565	RNA45S5	RNA, 45S pre-ribosomal 5
209542_x_at	4.19e-06	1.95e-07	-5.39376	6.71824	-1.83445	IGF1	insulin like growth factor 1
211355_x_at	0.000736	0.000104	-3.96187	0.76507	-1.83336	LEPROT///LEPR	leptin receptor overlapping transcript///leptin receptor
236772_s_at	7.13e-09	1.02e-10	-6.82872	13.9948	-1.83099
218000_s_at	4.23e-10	3.76e-12	-7.40083	17.194	-1.82926	PHLDA1	pleckstrin homology like domain family A member 1
205768_s_at	5.67e-05	4.6e-06	-4.71239	3.70403	-1.82899	SLC27A2	solute carrier family 27 member 2
215689_s_at	1.58e-09	1.79e-11	-7.13353	15.6806	-1.82521	SHBG	sex hormone binding globulin
214349_at	5.74e-22	2.52e-25	-12.0095	46.7094	-1.81984
205728_at	0.0004	4.91e-05	-4.15088	1.46541	-1.8184	TENM1	teneurin transmembrane protein 1
205530_at	2.24e-09	2.71e-11	-7.06217	15.282	-1.81823	ETFDH	electron transfer flavoprotein dehydrogenase
227697_at	1.63e-05	1.01e-06	-5.04808	5.14999	-1.81802	SOCS3	suppressor of cytokine signaling 3
207097_s_at	0.000317	3.7e-05	-4.22092	1.73185	-1.81645	SLC17A2	solute carrier family 17 member 2
208034_s_at	8.64e-08	1.93e-09	-6.29516	11.1553	-1.81353	PROZ	protein Z, vitamin K dependent plasma glycoprotein
201289_at	1.77e-05	1.11e-06	-5.028	5.06136	-1.81067	CYR61	cysteine rich angiogenic inducer 61
225987_at	7.42e-05	6.41e-06	-4.63697	3.38999	-1.80961	STEAP4	STEAP4 metalloreductase
207735_at	2.83e-08	5.08e-10	-6.54108	12.4457	-1.80919	RNF125	ring finger protein 125
217047_s_at	1.04e-05	5.8e-07	-5.16622	5.67712	-1.80787	FAM13A	family with sequence similarity 13 member A
243483_at	0.0054	0.0012	-3.28721	-1.50316	-1.80738	TRPM8	transient receptor potential cation channel subfamily M member 8
207256_at	0.00169	0.000287	-3.69218	-0.18582	-1.8049	MBL2	mannose binding lectin 2
227135_at	3.67e-11	2.29e-13	-7.86741	19.9087	-1.80476	NAAA	N-acylethanolamine acid amidase
208471_at	0.00159	0.000266	-3.71338	-0.11315	-1.80442	HPR	haptoglobin-related protein
206262_at	0.00733	0.00174	-3.17485	-1.84448	-1.80365	ADH1C	alcohol dehydrogenase 1C (class I), gamma polypeptide
214279_s_at	5.15e-06	2.5e-07	-5.34238	6.48024	-1.8004	NDRG2	NDRG family member 2
229596_at	3.64e-05	2.68e-06	-4.83378	4.21794	-1.79822	AMDHD1	amidohydrolase domain containing 1
39248_at	1.98e-07	5.22e-09	-6.10868	10.1986	-1.79773	AQP3	aquaporin 3 (Gill blood group)
220786_s_at	0.00111	0.000171	-3.83193	0.29972	-1.79548	SLC38A4	solute carrier family 38 member 4
236576_at	3.43e-21	1.63e-24	-11.7421	44.8899	-1.79411	CTNNA3	catenin alpha 3
206610_s_at	1.95e-07	5.11e-09	-6.11276	10.2193	-1.7939	F11	coagulation factor XI
206380_s_at	1.45e-13	3.81e-16	-8.88833	26.1297	-1.7938	CFP	complement factor properdin
210272_at	0.0006	8.08e-05	-4.0258	0.99885	-1.79203	CYP2B7P	cytochrome P450 family 2 subfamily B member 7, pseudogene
209301_at	4.21e-05	3.2e-06	-4.79405	4.04861	-1.79105	CA2	carbonic anhydrase 2
210942_s_at	1.33e-08	2.1e-10	-6.70011	13.297	-1.7863	ST3GAL6	ST3 beta-galactoside alpha-2,3-sialyltransferase 6
218804_at	0.0026	0.000488	-3.54602	-0.67681	-1.78473	ANO1	anoctamin 1
211356_x_at	0.00129	0.000206	-3.78185	0.12395	-1.78295	LEPROT///LEPR	leptin receptor overlapping transcript///leptin receptor
210095_s_at	2.92e-06	1.26e-07	-5.48322	7.1367	-1.78274	IGFBP3	insulin like growth factor binding protein 3
206916_x_at	2.19e-05	1.43e-06	-4.97246	4.81755	-1.78243	TAT	tyrosine aminotransferase
1559033_at	0.000498	6.42e-05	-4.08389	1.21404	-1.77725	LINC01018	long intergenic non-protein coding RNA 1018
1555189_a_at	7.18e-06	3.71e-07	-5.26035	6.10374	-1.77663	TAT	tyrosine aminotransferase
221188_s_at	2.95e-07	8.35e-09	-6.0191	9.74588	-1.77217	CIDEB	cell death-inducing DFFA-like effector b
206541_at	5.86e-06	2.91e-07	-5.31108	6.33608	-1.77039	KLKB1	kallikrein B1
242126_at	7.45e-07	2.5e-08	-5.8067	8.69114	-1.76947
227099_s_at	2.7e-05	1.86e-06	-4.91499	4.56744	-1.76587	C11orf96	chromosome 11 open reading frame 96
232584_at	1.22e-05	7.07e-07	-5.12418	5.4885	-1.76549
214413_at	0.000278	3.16e-05	-4.25955	1.8804	-1.76411	TAT	tyrosine aminotransferase
239093_at	5.73e-05	4.67e-06	-4.70899	3.68981	-1.76162	HOGA1	4-hydroxy-2-oxoglutarate aldolase 1
229229_at	1.27e-05	7.44e-07	-5.11317	5.4393	-1.75962	AGXT2	alanine--glyoxylate aminotransferase 2
228293_at	2.85e-06	1.23e-07	-5.48803	7.15934	-1.75917	DEPDC7	DEP domain containing 7
211354_s_at	0.00202	0.000357	-3.63317	-0.38613	-1.75865	LEPROT///LEPR	leptin receptor overlapping transcript///leptin receptor
211441_x_at	4.92e-07	1.51e-08	-5.90496	9.17582	-1.7545	CYP3A43	cytochrome P450 family 3 subfamily A member 43
213375_s_at	5.09e-10	4.7e-12	-7.3629	16.9773	-1.75403	N4BP2L1	NEDD4 binding protein 2 like 1
217999_s_at	1.08e-07	2.53e-09	-6.24529	10.8975	-1.7529	PHLDA1	pleckstrin homology like domain family A member 1
241843_at	9.83e-11	7.1e-13	-7.68069	18.8116	-1.75141	SNORA28///EIF5	small nucleolar RNA, H/ACA box 28///eukaryotic translation initiation factor 5
236495_at	7.11e-08	1.54e-09	-6.33767	11.376	-1.74848
231704_at	2.59e-05	1.77e-06	-4.92591	4.61477	-1.74769	CYP3A4	cytochrome P450 family 3 subfamily A member 4
209368_at	2.11e-06	8.59e-08	-5.56118	7.50546	-1.74709	EPHX2	epoxide hydrolase 2
231070_at	3.11e-08	5.67e-10	-6.52107	12.3395	-1.74529	IYD	iodotyrosine deiodinase
215103_at	0.000148	1.48e-05	-4.44193	2.59685	-1.74274	CYP2C18	cytochrome P450 family 2 subfamily C member 18
1553514_a_at	4.62e-09	6.21e-11	-6.91696	14.4783	-1.74245	VNN3	vanin 3
1563298_at	0.000122	1.16e-05	-4.4987	2.82486	-1.74189	LOC101927331	uncharacterized LOC101927331
228115_at	1.32e-09	1.43e-11	-7.17199	15.8963	-1.74021	GAREM1	GRB2 associated regulator of MAPK1 subtype 1
205355_at	6.38e-08	1.34e-09	-6.36333	11.5097	-1.73944	ACADSB	acyl-CoA dehydrogenase, short/branched chain
233180_at	3.67e-11	2.28e-13	-7.86803	19.9123	-1.73912
237310_at	0.000153	1.53e-05	-4.4334	2.56278	-1.73066
207820_at	0.00716	0.00169	-3.18403	-1.81701	-1.73058	ADH1A	alcohol dehydrogenase 1A (class I), alpha polypeptide
205769_at	0.000122	1.16e-05	-4.49909	2.82645	-1.72734	SLC27A2	solute carrier family 27 member 2
226030_at	1.27e-07	3.05e-09	-6.2101	10.7165	-1.72689	ACADSB	acyl-CoA dehydrogenase, short/branched chain
214180_at	2.06e-10	1.67e-12	-7.53755	17.9802	-1.72637	MAN1C1	mannosidase alpha class 1C member 1
220393_at	0.000196	2.08e-05	-4.36075	2.27491	-1.7248	LGSN	lengsin, lens protein with glutamine synthetase domain
213631_x_at	1.15e-09	1.22e-11	-7.19979	16.0527	-1.71961	DHODH	dihydroorotate dehydrogenase (quinone)
226863_at	0.00282	0.000539	-3.51813	-0.7685	-1.71532	FAM110C	family with sequence similarity 110 member C
209242_at	0.0141	0.0039	-2.92042	-2.57759	-1.7151	PEG3	paternally expressed 3
207076_s_at	8.02e-10	7.96e-12	-7.27323	16.4676	-1.71358	ASS1	argininosuccinate synthase 1
217238_s_at	0.00837	0.00205	-3.12472	-1.99332	-1.7134	ALDOB	aldolase, fructose-bisphosphate B
205082_s_at	0.00157	0.00026	-3.71879	-0.09456	-1.71293	AOX1	aldehyde oxidase 1
242868_at	6.08e-06	3.04e-07	-5.30201	6.29442	-1.70649
209278_s_at	3.61e-06	1.64e-07	-5.43017	6.88793	-1.70595	TFPI2	tissue factor pathway inhibitor 2
200796_s_at	2.29e-05	1.51e-06	-4.96056	4.76554	-1.70554	MCL1	BCL2 family apoptosis regulator
204121_at	1.75e-06	6.87e-08	-5.60603	7.71931	-1.70496	GADD45G	growth arrest and DNA damage inducible gamma
206979_at	4.17e-05	3.16e-06	-4.79696	4.06097	-1.70242	C8B	complement component 8, beta polypeptide
214282_at	1.88e-05	1.19e-06	-5.012	4.99088	-1.70219
241298_x_at	1.65e-15	2.33e-18	-9.66764	31.0906	-1.70071
215783_s_at	3.84e-07	1.14e-08	-5.95905	9.44506	-1.6962	ALPL	alkaline phosphatase, liver/bone/kidney
219313_at	6.89e-06	3.54e-07	-5.27023	6.14888	-1.69433	GRAMD1C	GRAM domain containing 1C
224480_s_at	2.56e-06	1.09e-07	-5.51389	7.28129	-1.68956	GPAT3	glycerol-3-phosphate acyltransferase 3
206287_s_at	6.24e-05	5.18e-06	-4.68537	3.59108	-1.6831	ITIH4	inter-alpha-trypsin inhibitor heavy chain family member 4
225207_at	0.000493	6.35e-05	-4.08691	1.2253	-1.68305	PDK4	pyruvate dehydrogenase kinase 4
232882_at	5.58e-05	4.51e-06	-4.71698	3.72328	-1.68288
218901_at	2.67e-08	4.74e-10	-6.5535	12.5117	-1.68184	PLSCR4	phospholipid scramblase 4
1555167_s_at	0.000136	1.33e-05	-4.46651	2.69528	-1.68171	NAMPT	nicotinamide phosphoribosyltransferase
1554837_a_at	1.45e-06	5.51e-08	-5.65036	7.93188	-1.68164	CYP4A22///CYP4A11	cytochrome P450 family 4 subfamily A member 22///cytochrome P450 family 4 subfamily A member 11
228648_at	4.86e-06	2.33e-07	-5.3575	6.5501	-1.68003	LRG1	leucine rich alpha-2-glycoprotein 1
206252_s_at	4.46e-14	1.05e-16	-9.08709	27.3795	-1.67893	AVPR1A	arginine vasopressin receptor 1A
220148_at	0.00169	0.000286	-3.69335	-0.18181	-1.67807	ALDH8A1	aldehyde dehydrogenase 8 family member A1
213684_s_at	4.06e-08	7.78e-10	-6.46338	12.0345	-1.67692	PDLIM5	PDZ and LIM domain 5
230602_at	9.45e-05	8.55e-06	-4.57036	3.11604	-1.67546	ACMSD	aminocarboxymuconate semialdehyde decarboxylase
205234_at	0.000105	9.74e-06	-4.54026	2.99326	-1.67486	SLC16A4	solute carrier family 16 member 4
207275_s_at	7.43e-06	3.87e-07	-5.25137	6.06279	-1.67287	ACSL1	acyl-CoA synthetase long-chain family member 1
208561_at	3.79e-07	1.12e-08	-5.96206	9.4601	-1.67244	ABCC9	ATP binding cassette subfamily C member 9
201694_s_at	2.32e-05	1.53e-06	-4.95716	4.75074	-1.67161	EGR1	early growth response 1
210852_s_at	4.67e-05	3.63e-06	-4.76577	3.92875	-1.67138	AASS	aminoadipate-semialdehyde synthase
216243_s_at	6.67e-09	9.43e-11	-6.8432	14.0739	-1.67059	IL1RN	interleukin 1 receptor antagonist
220161_s_at	1.51e-06	5.79e-08	-5.64043	7.88415	-1.67018	EPB41L4B	erythrocyte membrane protein band 4.1 like 4B
236307_at	2.77e-11	1.65e-13	-7.92109	20.2266	-1.6688
211440_x_at	3.33e-09	4.27e-11	-6.98249	14.8398	-1.66729	CYP3A43	cytochrome P450 family 3 subfamily A member 43
213874_at	0.00023	2.52e-05	-4.31494	2.09538	-1.66686	SERPINA4	serpin family A member 4
219195_at	4.18e-05	3.17e-06	-4.79649	4.05897	-1.6653	PPARGC1A	PPARG coactivator 1 alpha
209309_at	3.54e-05	2.59e-06	-4.84133	4.25024	-1.6633	AZGP1	alpha-2-glycoprotein 1, zinc-binding
208078_s_at	8.87e-06	4.77e-07	-5.20771	5.86448	-1.66276	SIK1	salt inducible kinase 1
206344_at	8.59e-05	7.62e-06	-4.59695	3.22503	-1.66141	PON1	paraoxonase 1
204621_s_at	3.81e-05	2.83e-06	-4.82162	4.166	-1.66091	NR4A2	nuclear receptor subfamily 4 group A member 2
210909_x_at	3.42e-15	5.64e-18	-9.53419	30.2301	-1.66051	LPAL2	lipoprotein(a) like 2, pseudogene
205114_s_at	9.84e-07	3.49e-08	-5.74114	8.37096	-1.6593	CCL3L3///CCL3L1///CCL3	C-C motif chemokine ligand 3 like 3///C-C motif chemokine ligand 3 like 1///C-C motif chemokine ligand 3
205813_s_at	9.57e-07	3.36e-08	-5.74826	8.40563	-1.65907	MAT1A	methionine adenosyltransferase 1A
205392_s_at	4.8e-08	9.47e-10	-6.4273	11.8447	-1.65291	CCL15-CCL14///CCL14	CCL15-CCL14 readthrough (NMD candidate)///C-C motif chemokine ligand 14
209613_s_at	0.0095	0.0024	-3.07576	-2.13661	-1.65085	ADH1B	alcohol dehydrogenase 1B (class I), beta polypeptide
237849_at	4.94e-07	1.52e-08	-5.90412	9.17169	-1.64862
205960_at	0.00133	0.000213	-3.77253	0.09145	-1.64789	PDK4	pyruvate dehydrogenase kinase 4
209894_at	0.00098	0.000147	-3.8712	0.43894	-1.64436	LEPROT///LEPR	leptin receptor overlapping transcript///leptin receptor
212592_at	0.00964	0.00244	-3.07004	-2.15322	-1.6417	JCHAIN	joining chain of multimeric IgA and IgM
235504_at	4.68e-08	9.15e-10	-6.43347	11.8771	-1.64166	GREM2	gremlin 2, DAN family BMP antagonist
204622_x_at	2.15e-05	1.4e-06	-4.97608	4.83337	-1.6388	NR4A2	nuclear receptor subfamily 4 group A member 2
220075_s_at	0.00106	0.000161	-3.84701	0.35304	-1.63658	CDHR5	cadherin related family member 5
232541_at	0.00178	0.000306	-3.67545	-0.2429	-1.63596
206172_at	0.000568	7.55e-05	-4.04299	1.06225	-1.6309	IL13RA2	interleukin 13 receptor subunit alpha 2
239562_at	3.53e-12	1.53e-14	-8.30652	22.5407	-1.6298	MTHFD2L	methylenetetrahydrofolate dehydrogenase (NADP+ dependent) 2-like
201397_at	1.52e-06	5.84e-08	-5.63865	7.8756	-1.62715	PHGDH	phosphoglycerate dehydrogenase
210889_s_at	0.000252	2.81e-05	-4.28828	1.99163	-1.62473	FCGR2B	Fc fragment of IgG receptor IIb
211458_s_at	9.01e-07	3.14e-08	-5.76196	8.47239	-1.62428	GABARAPL3///GABARAPL1	GABA type A receptor associated protein like 3 pseudogene///GABA type A receptor associated protein like 1
206251_s_at	4.83e-15	8.92e-18	-9.46452	29.7826	-1.62348	AVPR1A	arginine vasopressin receptor 1A
207980_s_at	2.94e-05	2.06e-06	-4.89213	4.46862	-1.61763	CITED2	Cbp/p300 interacting transactivator with Glu/Asp rich carboxy-terminal domain 2
217647_at	3.87e-09	5.09e-11	-6.95184	14.6704	-1.61579	DHODH	dihydroorotate dehydrogenase (quinone)
220106_at	0.00379	0.000772	-3.41546	-1.10062	-1.61521	NPC1L1	NPC1 like intracellular cholesterol transporter 1
238320_at	0.000187	1.96e-05	-4.37484	2.33044	-1.61263	MIR612///NEAT1	microRNA 612///nuclear paraspeckle assembly transcript 1 (non-protein coding)
218983_at	7.15e-09	1.03e-10	-6.82784	13.99	-1.61091	C1RL	complement C1r subcomponent like
204103_at	9.25e-07	3.23e-08	-5.756	8.44333	-1.61079	CCL4	C-C motif chemokine ligand 4
216248_s_at	5.25e-05	4.18e-06	-4.73418	3.79553	-1.60968	NR4A2	nuclear receptor subfamily 4 group A member 2
208126_s_at	0.000523	6.84e-05	-4.06817	1.15554	-1.60393	CYP2C18	cytochrome P450 family 2 subfamily C member 18
235199_at	1.14e-06	4.17e-08	-5.70594	8.20013	-1.60159	RNF125	ring finger protein 125
217739_s_at	1.69e-06	6.61e-08	-5.61397	7.75727	-1.59687	NAMPT	nicotinamide phosphoribosyltransferase
208937_s_at	0.000744	0.000105	-3.95857	0.75307	-1.59655	ID1	inhibitor of DNA binding 1, HLH protein
209978_s_at	0.00336	0.000668	-3.45727	-0.96642	-1.59474	PLG///LPA	plasminogen///lipoprotein(a)
206952_at	0.00244	0.00045	-3.56897	-0.60085	-1.59402	G6PC	glucose-6-phosphatase catalytic subunit
89977_at	0.00209	0.000372	-3.6213	-0.42608	-1.59365	ACSM5	acyl-CoA synthetase medium-chain family member 5
1558034_s_at	6.56e-05	5.51e-06	-4.6714	3.53286	-1.59361	CP	ceruloplasmin (ferroxidase)
208369_s_at	1.52e-08	2.47e-10	-6.67129	13.1418	-1.59173	GCDH	glutaryl-CoA dehydrogenase
207544_s_at	0.00117	0.000183	-3.81345	0.23464	-1.59044	ADH6	alcohol dehydrogenase 6 (class V)
204290_s_at	9.6e-07	3.38e-08	-5.74727	8.40079	-1.59029	ALDH6A1	aldehyde dehydrogenase 6 family member A1
210013_at	0.000313	3.65e-05	-4.22428	1.74475	-1.58964	HPX	hemopexin
232224_at	2.61e-08	4.61e-10	-6.55879	12.5399	-1.58871	MASP1	mannan binding lectin serine peptidase 1
227337_at	0.000179	1.85e-05	-4.38889	2.38596	-1.58866	ANKRD37	ankyrin repeat domain 37
1557225_at	4.6e-23	1.77e-26	-12.3885	49.2968	-1.58725	ASPG	asparaginase
221841_s_at	0.000249	2.77e-05	-4.29155	2.00431	-1.58142	KLF4	Kruppel like factor 4
209612_s_at	0.00966	0.00244	-3.06943	-2.15498	-1.58137	ADH1B	alcohol dehydrogenase 1B (class I), beta polypeptide
207626_s_at	9.66e-08	2.21e-09	-6.27032	11.0267	-1.58031	SLC7A2	solute carrier family 7 member 2
211549_s_at	0.00112	0.000172	-3.82946	0.29102	-1.58019	HPGD	hydroxyprostaglandin dehydrogenase 15-(NAD)
206606_at	0.000204	2.18e-05	-4.35003	2.23275	-1.5798	LIPC	lipase C, hepatic type
206867_at	4.9e-08	9.7e-10	-6.42277	11.8209	-1.57675	GCKR	glucokinase (hexokinase 4) regulator
204818_at	0.00163	0.000275	-3.70417	-0.14477	-1.57328	HSD17B2	hydroxysteroid 17-beta dehydrogenase 2
1556185_a_at	7.47e-10	7.25e-12	-7.28906	16.5573	-1.57295
217197_x_at	4.45e-11	2.83e-13	-7.83247	19.7023	-1.57195	N4BP2L1	NEDD4 binding protein 2 like 1
201743_at	1.19e-05	6.82e-07	-5.13165	5.52194	-1.57171	CD14	CD14 molecule
206514_s_at	0.000217	2.35e-05	-4.33157	2.16037	-1.56909	CYP4F2///CYP4F3	cytochrome P450 family 4 subfamily F member 2///cytochrome P450 family 4 subfamily F member 3
210959_s_at	1.03e-05	5.7e-07	-5.16986	5.69351	-1.56593	SRD5A1	steroid 5 alpha-reductase 1
226649_at	1.54e-06	5.92e-08	-5.63583	7.86207	-1.5643	PANK1	pantothenate kinase 1
212067_s_at	3.72e-06	1.69e-07	-5.42302	6.85455	-1.56049	C1R	complement C1r subcomponent
233887_at	5.04e-08	1.01e-09	-6.41628	11.7868	-1.55801	ADGRG6	adhesion G protein-coupled receptor G6
212560_at	5.01e-06	2.42e-07	-5.34923	6.51187	-1.55454	SORL1	sortilin related receptor 1
210452_x_at	0.000288	3.3e-05	-4.24908	1.84005	-1.55273	CYP4F2	cytochrome P450 family 4 subfamily F member 2
217487_x_at	4.93e-06	2.37e-07	-5.35368	6.53243	-1.55267	FOLH1B///FOLH1	folate hydrolase 1B///folate hydrolase (prostate-specific membrane antigen) 1
200856_x_at	4.74e-15	8.6e-18	-9.47021	29.8191	-1.5525	NCOR1	nuclear receptor corepressor 1
207420_at	7.48e-15	1.45e-17	-9.39055	29.3087	-1.55187	COLEC10	collectin subfamily member 10
238625_at	0.000339	4.03e-05	-4.20009	1.65224	-1.55123	C1orf168	chromosome 1 open reading frame 168
213478_at	4.8e-08	9.46e-10	-6.42743	11.8453	-1.5505	KAZN	kazrin, periplakin interacting protein
214043_at	0.00153	0.000252	-3.72723	-0.0655	-1.54825	PTPRD	protein tyrosine phosphatase, receptor type D
220479_at	3.5e-05	2.55e-06	-4.84453	4.26395	-1.54811	CPS1-IT1	CPS1 intronic transcript 1
1557226_a_at	3.08e-22	1.3e-25	-12.1046	47.3577	-1.54775	ASPG	asparaginase
203574_at	1.5e-09	1.69e-11	-7.14387	15.7385	-1.54651	NFIL3	nuclear factor, interleukin 3 regulated
212526_at	5.16e-08	1.04e-09	-6.40953	11.7514	-1.5453	SPG20	spastic paraplegia 20 (Troyer syndrome)
210366_at	0.00171	0.00029	-3.68946	-0.19511	-1.54529	SLCO1B1	solute carrier organic anion transporter family member 1B1
218424_s_at	3.55e-05	2.59e-06	-4.84096	4.24866	-1.54336	STEAP3	STEAP3 metalloreductase
214456_x_at	0.0113	0.00296	-3.00924	-2.32799	-1.54224	SAA2///SAA1	serum amyloid A2///serum amyloid A1
243110_x_at	0.00251	0.000466	-3.55867	-0.63499	-1.5364	NPW	neuropeptide W
214765_s_at	2.27e-10	1.86e-12	-7.51943	17.8755	-1.53141	NAAA	N-acylethanolamine acid amidase
207907_at	5.23e-05	4.17e-06	-4.73485	3.79834	-1.52732	TNFSF14	tumor necrosis factor superfamily member 14
238967_at	1.07e-05	6e-07	-5.15895	5.64443	-1.52597
228391_at	0.000313	3.65e-05	-4.22457	1.74586	-1.52597	CYP4V2	cytochrome P450 family 4 subfamily V member 2
205789_at	5.02e-05	3.97e-06	-4.74559	3.84355	-1.52581	CD1D	CD1d molecule
210106_at	9.62e-09	1.45e-10	-6.76724	13.6602	-1.52499	BLOC1S1-RDH5///RDH5	BLOC1S1-RDH5 readthrough///retinol dehydrogenase 5
232174_at	0.000327	3.85e-05	-4.211	1.69391	-1.5248
222705_s_at	1.09e-05	6.14e-07	-5.15424	5.62327	-1.52303	SLC25A15	solute carrier family 25 member 15
225539_at	1.04e-10	7.59e-13	-7.66961	18.7469	-1.52285	ZBTB21	zinc finger and BTB domain containing 21
235419_at	0.000853	0.000124	-3.91581	0.59858	-1.52238
210473_s_at	1.94e-07	5.07e-09	-6.11408	10.226	-1.52215	ADGRA3	adhesion G protein-coupled receptor A3
213695_at	0.000124	1.19e-05	-4.49351	2.80392	-1.5213	PON3	paraoxonase 3
208016_s_at	1.53e-06	5.89e-08	-5.63704	7.86789	-1.52119	AGTR1	angiotensin II receptor type 1
208813_at	8.77e-08	1.97e-09	-6.29188	11.1383	-1.52034	GOT1	glutamic-oxaloacetic transaminase 1
243278_at	0.000112	1.06e-05	-4.52091	2.9147	-1.51864	FOXP2	forkhead box P2
202465_at	1.68e-05	1.04e-06	-5.04144	5.12067	-1.51795	PCOLCE	procollagen C-endopeptidase enhancer
230438_at	5.18e-05	4.12e-06	-4.73749	3.80943	-1.51744	TBX15	T-box 15
239930_at	1.92e-06	7.64e-08	-5.58469	7.61736	-1.51724	GALNT2	polypeptide N-acetylgalactosaminyltransferase 2
206345_s_at	0.00889	0.00221	-3.1013	-2.06213	-1.51721	PON1	paraoxonase 1
207526_s_at	1.22e-17	9.87e-21	-10.48	36.4114	-1.51612	IL1RL1	interleukin 1 receptor like 1
212659_s_at	5.7e-13	1.84e-15	-8.64221	24.5983	-1.51592	IL1RN	interleukin 1 receptor antagonist
211224_s_at	0.000406	5e-05	-4.14646	1.44871	-1.51494	ABCB11	ATP binding cassette subfamily B member 11
215447_at	1.9e-05	1.21e-06	-5.00874	4.97654	-1.51444
214837_at	0.000789	0.000113	-3.94005	0.68599	-1.51432	ALB	albumin
31835_at	0.00812	0.00197	-3.13632	-1.95907	-1.51402	HRG	histidine rich glycoprotein
243659_at	4.31e-09	5.72e-11	-6.93143	14.5579	-1.51323
211843_x_at	0.0052	0.00114	-3.30151	-1.45897	-1.51239	CYP3A7-CYP3A51P	CYP3A7-CYP3A51P readthrough
227654_at	4.88e-12	2.18e-14	-8.24938	22.1942	-1.51151	FAM65C	family with sequence similarity 65 member C
228653_at	0.0022	0.000396	-3.60415	-0.4836	-1.51136	SAMD5	sterile alpha motif domain containing 5
236652_at	0.00192	0.000335	-3.64994	-0.32948	-1.51004	LOC149703	uncharacterized LOC149703
214146_s_at	2.2e-11	1.24e-13	-7.96825	20.5068	-1.50877	PPBP	pro-platelet basic protein
223967_at	1.02e-11	5.23e-14	-8.10845	21.3447	-1.50753	ANGPTL6	angiopoietin like 6
215506_s_at	2.47e-06	1.04e-07	-5.52335	7.32602	-1.50538	DIRAS3	DIRAS family GTPase 3
214657_s_at	0.000185	1.92e-05	-4.3796	2.34923	-1.50474	MIR612///NEAT1	microRNA 612///nuclear paraspeckle assembly transcript 1 (non-protein coding)
222529_at	4.83e-08	9.53e-10	-6.42605	11.8381	-1.50313	SLC25A37	solute carrier family 25 member 37
1558010_s_at	0.000439	5.49e-05	-4.12319	1.36108	-1.49967	SLC1A2	solute carrier family 1 member 2
240033_at	6.17e-05	5.11e-06	-4.6885	3.60414	-1.4957	PLG	plasminogen
221588_x_at	6.26e-07	2.05e-08	-5.84527	8.88071	-1.49199	ALDH6A1	aldehyde dehydrogenase 6 family member A1
208868_s_at	2.03e-08	3.42e-10	-6.61257	12.8268	-1.49141	GABARAPL1	GABA type A receptor associated protein like 1
208288_at	0.00222	0.000402	-3.60025	-0.49665	-1.48442	ABCB11	ATP binding cassette subfamily B member 11
208869_s_at	9.58e-07	3.37e-08	-5.74785	8.40363	-1.4833	GABARAPL1	GABA type A receptor associated protein like 1
205019_s_at	4.02e-17	4.04e-20	-10.2721	35.0374	-1.48323	VIPR1	vasoactive intestinal peptide receptor 1
221868_at	2.44e-06	1.02e-07	-5.52586	7.3379	-1.48317	PAIP2B	poly(A) binding protein interacting protein 2B
213094_at	2.94e-05	2.06e-06	-4.89222	4.469	-1.48223	ADGRG6	adhesion G protein-coupled receptor G6
226756_at	0.000113	1.07e-05	-4.51914	2.90752	-1.48205	CCDC71L	coiled-coil domain containing 71-like
209980_s_at	2.92e-05	2.04e-06	-4.8937	4.47535	-1.47919	MIR6778///SHMT1	microRNA 6778///serine hydroxymethyltransferase 1
239652_at	0.000368	4.46e-05	-4.17484	1.55613	-1.47649
207202_s_at	0.000555	7.35e-05	-4.04977	1.08731	-1.47581	NR1I2	nuclear receptor subfamily 1 group I member 2
212856_at	2.41e-09	2.93e-11	-7.0482	15.2042	-1.47541	GRAMD4	GRAM domain containing 4
226370_at	1.71e-11	9.32e-14	-8.01455	20.7827	-1.47516	KLHL15	kelch like family member 15
214274_s_at	2.31e-09	2.8e-11	-7.05622	15.2488	-1.47097	ACAA1	acetyl-CoA acyltransferase 1
210326_at	0.00312	0.00061	-3.48279	-0.88379	-1.47062	AGXT	alanine-glyoxylate aminotransferase
200798_x_at	4.19e-08	8.05e-10	-6.45695	12.0006	-1.47034	MCL1	BCL2 family apoptosis regulator
210751_s_at	1.38e-05	8.18e-07	-5.09293	5.34904	-1.46842	RGN	regucalcin
1570505_at	0.00376	0.000766	-3.41797	-1.09259	-1.46814	ABCB4	ATP binding cassette subfamily B member 4
205083_at	0.00606	0.00138	-3.24512	-1.63227	-1.46811	AOX1	aldehyde oxidase 1
230333_at	9.41e-05	8.5e-06	-4.5719	3.12233	-1.466
226859_at	5.47e-08	1.12e-09	-6.39584	11.6797	-1.46516	DNAJC25-GNG10///DNAJC25	DNAJC25-GNG10 readthrough///DnaJ heat shock protein family (Hsp40) member C25
228561_at	1.72e-08	2.85e-10	-6.64592	13.0055	-1.46492	CDC37L1	cell division cycle 37 like 1
1569542_at	2.27e-07	6.12e-09	-6.07828	10.0444	-1.46485	ADGRA3	adhesion G protein-coupled receptor A3
200857_s_at	9.42e-13	3.26e-15	-8.55199	24.0417	-1.46471	NCOR1	nuclear receptor corepressor 1
1553722_s_at	2.71e-23	9.44e-27	-12.4777	49.9072	-1.46259	RNF152	ring finger protein 152
207387_s_at	2.42e-06	1.01e-07	-5.52905	7.35303	-1.46088	GK	glycerol kinase
223217_s_at	1.83e-06	7.22e-08	-5.59609	7.67179	-1.46073	NFKBIZ	NFKB inhibitor zeta
214805_at	6.58e-08	1.4e-09	-6.35543	11.4685	-1.45974	SNORD10///SNORA48///SNORA67///EIF4A1	small nucleolar RNA, C/D box 10///small nucleolar RNA, H/ACA box 48///small nucleolar RNA, H/ACA box 67///eukaryotic translation initiation factor 4A1
225573_at	5.29e-07	1.64e-08	-5.88858	9.09463	-1.45812	NPHP3-ACAD11///ACAD11///NPHP3	NPHP3-ACAD11 readthrough (NMD candidate)///acyl-CoA dehydrogenase family member 11///nephronophthisis 3 (adolescent)
235102_x_at	1.41e-13	3.64e-16	-8.89542	26.1741	-1.45739	SNORD3D///SNORD3C///SNORD3B-2///SNORD3A///SNORD3B-1	small nucleolar RNA, C/D box 3D///small nucleolar RNA, C/D box 3C///small nucleolar RNA, C/D box 3B-2///small nucleolar RNA, C/D box 3A///small nucleolar RNA, C/D box 3B-1
223333_s_at	1.85e-05	1.17e-06	-5.01567	5.00702	-1.45619	ANGPTL4	angiopoietin like 4
225842_at	2.55e-05	1.73e-06	-4.93013	4.63312	-1.45529	PHLDA1	pleckstrin homology like domain family A member 1
1555229_a_at	0.00973	0.00247	-3.06643	-2.16369	-1.45524	C1S	complement component 1, s subcomponent
209977_at	0.00434	0.000912	-3.36715	-1.25384	-1.45248	PLG	plasminogen
207345_at	0.00205	0.000365	-3.62709	-0.4066	-1.45187	FST	follistatin
37201_at	6.83e-05	5.8e-06	-4.65964	3.48398	-1.45172	ITIH4	inter-alpha-trypsin inhibitor heavy chain family member 4
215129_at	4.31e-05	3.29e-06	-4.78788	4.02242	-1.44671	PIK3C2G	phosphatidylinositol-4-phosphate 3-kinase catalytic subunit type 2 gamma
216381_x_at	8.65e-05	7.68e-06	-4.59519	3.21778	-1.44576	AKR7A3	aldo-keto reductase family 7 member A3
220924_s_at	1.17e-09	1.24e-11	-7.19748	16.0397	-1.4452	SLC38A2	solute carrier family 38 member 2
223218_s_at	2.58e-06	1.1e-07	-5.51177	7.2713	-1.44417	NFKBIZ	NFKB inhibitor zeta
205923_at	0.0369	0.0128	-2.51085	-3.63896	-1.44	RELN	reelin
243015_at	0.00274	0.00052	-3.52792	-0.73639	-1.43635	CYP3A5	cytochrome P450 family 3 subfamily A member 5
206396_at	2.86e-05	1.99e-06	-4.89926	4.49937	-1.43571	SLC1A1	solute carrier family 1 member 1
201451_x_at	4.47e-15	7.86e-18	-9.48372	29.9058	-1.43525	RHEB	Ras homolog enriched in brain
223426_s_at	7.29e-12	3.56e-14	-8.17051	21.718	-1.43477	EPB41L4B	erythrocyte membrane protein band 4.1 like 4B
240156_at	3.08e-17	2.87e-20	-10.3226	35.3701	-1.43453
204846_at	0.000234	2.57e-05	-4.30978	2.07527	-1.43333	CP	ceruloplasmin (ferroxidase)
217738_at	1.44e-05	8.61e-07	-5.08195	5.30019	-1.43281	NAMPT	nicotinamide phosphoribosyltransferase
203500_at	1.49e-08	2.4e-10	-6.67622	13.1683	-1.42927	GCDH	glutaryl-CoA dehydrogenase
237248_at	0.000361	4.36e-05	-4.18056	1.57785	-1.42803	PDE11A	phosphodiesterase 11A
201041_s_at	8.72e-06	4.67e-07	-5.21193	5.8836	-1.42658	DUSP1	dual specificity phosphatase 1
215977_x_at	2.15e-07	5.78e-09	-6.08931	10.1003	-1.42494	GK	glycerol kinase
210653_s_at	9.11e-06	4.92e-07	-5.20083	5.83331	-1.42322	BCKDHB	branched chain keto acid dehydrogenase E1 subunit beta
220346_at	2.89e-14	6.24e-17	-9.16759	27.8889	-1.42177	MTHFD2L	methylenetetrahydrofolate dehydrogenase (NADP+ dependent) 2-like
214906_x_at	5.7e-12	2.62e-14	-8.2198	22.0153	-1.42106	N4BP2L1	NEDD4 binding protein 2 like 1
227345_at	7.63e-10	7.45e-12	-7.28449	16.5314	-1.42082	TNFRSF10D	TNF receptor superfamily member 10d
220224_at	0.000969	0.000145	-3.8754	0.45392	-1.42069	HAO1	hydroxyacid oxidase 1
215563_s_at	8.88e-08	2.01e-09	-6.28825	11.1195	-1.41851	MST1L	macrophage stimulating 1 like
238178_at	3.52e-06	1.59e-07	-5.43657	6.91787	-1.41849
202672_s_at	2.01e-05	1.29e-06	-4.99382	4.91104	-1.41772	ATF3	activating transcription factor 3
214681_at	2.89e-08	5.21e-10	-6.53633	12.4205	-1.41623	GK	glycerol kinase
1559910_at	1.26e-05	7.35e-07	-5.11587	5.45132	-1.41502
228793_at	9.87e-06	5.42e-07	-5.18047	5.74135	-1.41372	JMJD1C	jumonji domain containing 1C
37512_at	0.0117	0.0031	-2.99463	-2.36954	-1.4122	HSD17B6	hydroxysteroid 17-beta dehydrogenase 6
203790_s_at	2.76e-05	1.91e-06	-4.90879	4.54059	-1.41121	RIDA	reactive intermediate imine deaminase A homolog
206170_at	3.5e-05	2.56e-06	-4.84434	4.2631	-1.41114	ADRB2	adrenoceptor beta 2
209374_s_at	0.00495	0.00107	-3.3199	-1.40185	-1.41003	IGHM	immunoglobulin heavy constant mu
231140_at	3.26e-12	1.37e-14	-8.32413	22.6477	-1.40825	TPPP2	tubulin polymerization promoting protein family member 2
213974_at	0.000126	1.22e-05	-4.4876	2.78008	-1.40762	ADAMTSL3	ADAMTS like 3
244172_at	9.1e-09	1.36e-10	-6.77783	13.7177	-1.40672
235201_at	0.000101	9.28e-06	-4.55145	3.03885	-1.40659	FOXP2	forkhead box P2
204705_x_at	0.0115	0.00304	-3.00038	-2.35319	-1.40509	ALDOB	aldolase, fructose-bisphosphate B
206417_at	1.41e-05	8.39e-07	-5.08735	5.32418	-1.40443	CNGA1	cyclic nucleotide gated channel alpha 1
230494_at	0.00102	0.000155	-3.85755	0.39043	-1.40418	SLC20A1	solute carrier family 20 member 1
206738_at	0.0158	0.00451	-2.87273	-2.70877	-1.40336	APOC4-APOC2///APOC4///APOC2	APOC4-APOC2 readthrough (NMD candidate)///apolipoprotein C4///apolipoprotein C2
205302_at	0.00946	0.00239	-3.07717	-2.13252	-1.40264	IGFBP1	insulin like growth factor binding protein 1
232158_x_at	3.16e-07	9.06e-09	-6.00336	9.66683	-1.40214	LOC101927157///NIPAL1	uncharacterized LOC101927157///NIPA like domain containing 1
39763_at	0.000652	8.94e-05	-3.99981	0.90343	-1.40033	HPX	hemopexin
219377_at	3.62e-08	6.82e-10	-6.4875	12.1618	-1.39814	GAREM1	GRB2 associated regulator of MAPK1 subtype 1
211922_s_at	6.26e-07	2.05e-08	-5.84541	8.88143	-1.393	CAT	catalase
237262_at	8.62e-11	6.03e-13	-7.70776	18.9698	-1.39296	GAREM1	GRB2 associated regulator of MAPK1 subtype 1
205700_at	0.0106	0.00276	-3.03107	-2.26561	-1.39132	HSD17B6	hydroxysteroid 17-beta dehydrogenase 6
211494_s_at	3.71e-05	2.74e-06	-4.82889	4.19701	-1.38714	SLC4A4	solute carrier family 4 member 4
242736_at	1.76e-05	1.1e-06	-5.02965	5.0686	-1.38514
206226_at	0.0274	0.00884	-2.64425	-3.30959	-1.38346	HRG	histidine rich glycoprotein
201328_at	1.59e-07	4.01e-09	-6.15844	10.452	-1.38302	ETS2	ETS proto-oncogene 2, transcription factor
229465_s_at	1.89e-05	1.2e-06	-5.00997	4.98199	-1.38226	PTPRS	protein tyrosine phosphatase, receptor type S
203649_s_at	0.112	0.0517	-1.95766	-4.83219	-1.38035	PLA2G2A	phospholipase A2 group IIA
239901_at	4.83e-12	2.15e-14	-8.25165	22.208	-1.37976
204154_at	0.00975	0.00248	-3.06552	-2.16633	-1.37965	CDO1	cysteine dioxygenase type 1
1552280_at	1.85e-06	7.33e-08	-5.59317	7.65787	-1.37931	TIMD4	T-cell immunoglobulin and mucin domain containing 4
204675_at	0.000145	1.44e-05	-4.44823	2.62202	-1.37911	SRD5A1	steroid 5 alpha-reductase 1
202366_at	8.65e-13	2.96e-15	-8.5671	24.1347	-1.37894	ACADS	acyl-CoA dehydrogenase, C-2 to C-3 short chain
218322_s_at	0.000273	3.1e-05	-4.26426	1.89862	-1.37769	ACSL5	acyl-CoA synthetase long-chain family member 5
240830_at	2.18e-06	8.93e-08	-5.55338	7.4684	-1.37601	SCARNA17	small Cajal body-specific RNA 17
241869_at	0.00108	0.000166	-3.83963	0.32692	-1.37548	APOL6	apolipoprotein L6
221009_s_at	0.000109	1.02e-05	-4.52855	2.94568	-1.37294	ANGPTL4	angiopoietin like 4
210301_at	7.22e-06	3.74e-07	-5.25887	6.097	-1.37254	XDH	xanthine dehydrogenase
202068_s_at	1.24e-06	4.57e-08	-5.6874	8.11043	-1.37228	LDLR	low density lipoprotein receptor
220061_at	0.00273	0.000518	-3.52934	-0.73174	-1.37172	ACSM5	acyl-CoA synthetase medium-chain family member 5
202670_at	2.31e-15	3.5e-18	-9.60602	30.6928	-1.37161	MAP2K1	mitogen-activated protein kinase kinase 1
227197_at	3.15e-05	2.24e-06	-4.8735	4.3883	-1.37116	ARHGEF26	Rho guanine nucleotide exchange factor 26
227253_at	0.000185	1.93e-05	-4.37867	2.34555	-1.36962	CP	ceruloplasmin (ferroxidase)
231773_at	0.00026	2.92e-05	-4.279	1.95563	-1.36936	ANGPTL1	angiopoietin like 1
211357_s_at	0.0149	0.00419	-2.89743	-2.64108	-1.36927	ALDOB	aldolase, fructose-bisphosphate B
223315_at	0.000104	9.65e-06	-4.54241	3.00203	-1.36778	NTN4	netrin 4
201566_x_at	7.43e-09	1.07e-10	-6.82018	13.9482	-1.36705	ID2	inhibitor of DNA binding 2, HLH protein
223062_s_at	0.000962	0.000143	-3.87769	0.46208	-1.36561	PSAT1	phosphoserine aminotransferase 1
237466_s_at	9.32e-11	6.67e-13	-7.69099	18.8717	-1.365	HHIP	hedgehog interacting protein
227336_at	1.59e-09	1.8e-11	-7.13261	15.6754	-1.36474	DTX1	deltex E3 ubiquitin ligase 1
203509_at	2.66e-06	1.14e-07	-5.5042	7.23555	-1.36309	SORL1	sortilin related receptor 1
205141_at	0.00108	0.000166	-3.83931	0.32579	-1.36275	ANG	angiogenin
242541_at	3.52e-08	6.58e-10	-6.49399	12.1961	-1.3616	ABCA9	ATP binding cassette subfamily A member 9
205042_at	2.8e-06	1.21e-07	-5.49256	7.18068	-1.36128	GNE	glucosamine (UDP-N-acetyl)-2-epimerase/N-acetylmannosamine kinase
218041_x_at	7.98e-09	1.17e-10	-6.80507	13.8659	-1.3612	SLC38A2	solute carrier family 38 member 2
226846_at	0.000191	2.01e-05	-4.36909	2.30777	-1.36046	PHYHD1	phytanoyl-CoA dioxygenase domain containing 1
226785_at	9.61e-05	8.74e-06	-4.56522	3.09503	-1.36025	ATP11C	ATPase phospholipid transporting 11C
227702_at	0.000288	3.31e-05	-4.24862	1.83828	-1.35868	CYP4X1	cytochrome P450 family 4 subfamily X member 1
208389_s_at	0.00309	0.000602	-3.48696	-0.87025	-1.35756	SLC1A2	solute carrier family 1 member 2
206469_x_at	0.000114	1.08e-05	-4.51605	2.89501	-1.35727	AKR7A3	aldo-keto reductase family 7 member A3
1555250_a_at	4.85e-11	3.13e-13	-7.81621	19.6065	-1.35697	CPEB3	cytoplasmic polyadenylation element binding protein 3
203354_s_at	0.000135	1.33e-05	-4.46776	2.70032	-1.35631	PSD3	pleckstrin and Sec7 domain containing 3
206453_s_at	1.47e-07	3.68e-09	-6.17492	10.5362	-1.35581	NDRG2	NDRG family member 2
202025_x_at	4.43e-10	3.98e-12	-7.3912	17.1389	-1.35556	ACAA1	acetyl-CoA acyltransferase 1
205221_at	0.000292	3.36e-05	-4.24469	1.82315	-1.35447	HGD	homogentisate 1,2-dioxygenase
223820_at	0.000648	8.87e-05	-4.00197	0.91132	-1.35401	RBP5	retinol binding protein 5
209355_s_at	3.35e-08	6.19e-10	-6.50505	12.2547	-1.35395	PLPP3	phospholipid phosphatase 3
222043_at	7.1e-06	3.66e-07	-5.26305	6.11609	-1.35377	CLU	clusterin
217583_at	0.000902	0.000133	-3.89762	0.53329	-1.35325	LOC101929036///PAH	uncharacterized LOC101929036///phenylalanine hydroxylase
219181_at	0.00149	0.000244	-3.73624	-0.03441	-1.34924	LIPG	lipase G, endothelial type
1554830_a_at	0.000159	1.61e-05	-4.42254	2.51949	-1.34778	STEAP3	STEAP3 metalloreductase
222291_at	0.000144	1.43e-05	-4.44928	2.62621	-1.34769	FAM149A	family with sequence similarity 149 member A
206065_s_at	0.00819	0.00199	-3.1333	-1.96799	-1.34755	DPYS	dihydropyrimidinase
204607_at	0.00172	0.000292	-3.68743	-0.20203	-1.34675	HMGCS2	3-hydroxy-3-methylglutaryl-CoA synthase 2
213596_at	5.12e-08	1.03e-09	-6.41155	11.762	-1.34632	CASP4	caspase 4
205357_s_at	2.43e-05	1.62e-06	-4.94439	4.69509	-1.34621	AGTR1	angiotensin II receptor type 1
239818_x_at	2.43e-05	1.62e-06	-4.9442	4.69427	-1.34362	TRIB1	tribbles pseudokinase 1
203665_at	2.81e-05	1.95e-06	-4.90375	4.5188	-1.34352	HMOX1	heme oxygenase 1
202724_s_at	2.08e-08	3.53e-10	-6.60731	12.7987	-1.33988	FOXO1	forkhead box O1
1563160_at	2.92e-07	8.23e-09	-6.02174	9.75919	-1.3395	F11	coagulation factor XI
1569582_at	0.000903	0.000133	-3.89739	0.53249	-1.33666	AADACP1	arylacetamide deacetylase pseudogene 1
241114_s_at	4.93e-06	2.37e-07	-5.35356	6.53188	-1.33571	ACAA2	acetyl-CoA acyltransferase 2
225212_at	2.15e-06	8.78e-08	-5.55666	7.48398	-1.333	SLC25A25	solute carrier family 25 member 25
221834_at	1.45e-07	3.6e-09	-6.17883	10.5562	-1.33177	LOC100507577///LONP2	uncharacterized LOC100507577///lon peptidase 2, peroxisomal
229241_at	1.23e-05	7.13e-07	-5.12212	5.47927	-1.33086	LDHD	lactate dehydrogenase D
212816_s_at	0.000491	6.3e-05	-4.08862	1.23165	-1.33031	CBS	cystathionine-beta-synthase
224043_s_at	0.00308	0.0006	-3.48758	-0.86822	-1.33031	UPB1	beta-ureidopropionase 1
210472_at	1.22e-07	2.91e-09	-6.21868	10.7606	-1.32983	MT1G	metallothionein 1G
205075_at	4.07e-05	3.06e-06	-4.80395	4.09068	-1.32711	SERPINF2	serpin family F member 2
202241_at	9.94e-07	3.53e-08	-5.73866	8.35889	-1.32708	TRIB1	tribbles pseudokinase 1
226750_at	2.76e-08	4.93e-10	-6.54651	12.4746	-1.32444	LARP1B	La ribonucleoprotein domain family member 1B
210327_s_at	0.00542	0.0012	-3.2862	-1.50626	-1.32389	AGXT	alanine-glyoxylate aminotransferase
202444_s_at	2.52e-05	1.7e-06	-4.93406	4.65018	-1.32356	ERLIN1	ER lipid raft associated 1
235349_at	3.38e-07	9.78e-09	-5.98872	9.59345	-1.32286	RMDN2	regulator of microtubule dynamics 2
211110_s_at	0.000606	8.17e-05	-4.02293	0.98827	-1.3226	AR	androgen receptor
205657_at	2.08e-07	5.52e-09	-6.09797	10.1442	-1.32256	HAAO	3-hydroxyanthranilate 3,4-dioxygenase
218162_at	0.000301	3.49e-05	-4.23547	1.7877	-1.32119	OLFML3	olfactomedin like 3
242750_at	1.3e-05	7.62e-07	-5.10794	5.41596	-1.3207	MMAA	methylmalonic aciduria (cobalamin deficiency) cblA type
200855_at	1.31e-15	1.75e-18	-9.71037	31.3671	-1.32028	NCOR1	nuclear receptor corepressor 1
217167_x_at	4.37e-09	5.83e-11	-6.92793	14.5387	-1.32011	GK	glycerol kinase
208562_s_at	2.79e-08	5.01e-10	-6.54366	12.4594	-1.31825	ABCC9	ATP binding cassette subfamily C member 9
242153_at	1.69e-08	2.78e-10	-6.65043	13.0297	-1.31815	LARP1B	La ribonucleoprotein domain family member 1B
203499_at	4.8e-10	4.36e-12	-7.37577	17.0507	-1.31619	EPHA2	EPH receptor A2
208088_s_at	0.0759	0.0316	-2.16436	-4.41925	-1.31568	CFHR5	complement factor H related 5
206449_s_at	9.05e-05	8.1e-06	-4.58287	3.16725	-1.3152	MASP1	mannan binding lectin serine peptidase 1
224566_at	0.000428	5.32e-05	-4.13118	1.39111	-1.3148	MIR612///NEAT1	microRNA 612///nuclear paraspeckle assembly transcript 1 (non-protein coding)
205018_s_at	0.000728	0.000102	-3.96552	0.77834	-1.31328	MBNL2	muscleblind like splicing regulator 2
210063_at	4.65e-08	9.09e-10	-6.43469	11.8835	-1.31264	SARDH	sarcosine dehydrogenase
214261_s_at	0.00286	0.000548	-3.51328	-0.78438	-1.31257	ADH6	alcohol dehydrogenase 6 (class V)
206256_at	0.000334	3.96e-05	-4.20411	1.66758	-1.31196	CPN1	carboxypeptidase N subunit 1
205073_at	2.9e-05	2.03e-06	-4.89574	4.48417	-1.31138	CYP2J2	cytochrome P450 family 2 subfamily J member 2
203566_s_at	1.25e-08	1.97e-10	-6.71199	13.3612	-1.30802	AGL	amylo-alpha-1, 6-glucosidase, 4-alpha-glucanotransferase
235904_at	0.0598	0.0235	-2.28292	-4.16457	-1.30785	UGT3A1	UDP glycosyltransferase family 3 member A1
200730_s_at	1.02e-05	5.64e-07	-5.17204	5.70337	-1.30773	PTP4A1	protein tyrosine phosphatase type IVA, member 1
211492_s_at	7.25e-19	4.91e-22	-10.9186	39.3335	-1.30762	ADRA1A	adrenoceptor alpha 1A
208891_at	3.58e-05	2.63e-06	-4.83801	4.236	-1.30693	DUSP6	dual specificity phosphatase 6
206211_at	0.000211	2.28e-05	-4.33924	2.19041	-1.30459	SELE	selectin E
223278_at	0.00142	0.00023	-3.75191	0.0198	-1.3027	GJB2	gap junction protein beta 2
213380_x_at	4.16e-05	3.15e-06	-4.79786	4.0648	-1.30208	LOC102724562///MST1L///MST1P2///MST1	macrophage stimulating 1 pseudogene///macrophage stimulating 1 like///macrophage stimulating 1 pseudogene 2///macrophage stimulating 1
209236_at	9.84e-06	5.4e-07	-5.18136	5.74537	-1.30168	SLC23A2	solute carrier family 23 member 2
1555564_a_at	0.00097	0.000145	-3.875	0.45249	-1.3016	CFI	complement factor I
210172_at	9.84e-05	9.01e-06	-4.55824	3.06651	-1.298	SF1	splicing factor 1
211715_s_at	0.000324	3.82e-05	-4.21337	1.70298	-1.29724	BDH1	3-hydroxybutyrate dehydrogenase, type 1
231559_at	3.65e-07	1.07e-08	-5.9717	9.50823	-1.2972	NNMT	nicotinamide N-methyltransferase
201473_at	3.49e-06	1.56e-07	-5.43927	6.93047	-1.29712	JUNB	JunB proto-oncogene, AP-1 transcription factor subunit
202972_s_at	0.000217	2.34e-05	-4.3323	2.16323	-1.29172	FAM13A	family with sequence similarity 13 member A
213056_at	1.87e-07	4.84e-09	-6.12279	10.2703	-1.29139	FRMD4B	FERM domain containing 4B
220773_s_at	8.45e-06	4.51e-07	-5.21947	5.91778	-1.28895	GPHN	gephyrin
224356_x_at	0.000472	6.01e-05	-4.1007	1.27678	-1.28783	MS4A6A	membrane spanning 4-domains A6A
205222_at	0.000944	0.00014	-3.88328	0.48203	-1.2877	EHHADH	enoyl-CoA, hydratase/3-hydroxyacyl CoA dehydrogenase
226197_at	0.00226	0.00041	-3.59425	-0.51669	-1.28684	AR	androgen receptor
201531_at	2.03e-08	3.42e-10	-6.6128	12.8281	-1.2858	ZFP36	ZFP36 ring finger protein
219873_at	0.00252	0.000468	-3.55795	-0.63736	-1.28559	COLEC11	collectin subfamily member 11
209515_s_at	1.07e-05	6.05e-07	-5.15725	5.63681	-1.28505	RAB27A	RAB27A, member RAS oncogene family
201329_s_at	3.24e-08	5.96e-10	-6.51205	12.2917	-1.28488	ETS2	ETS proto-oncogene 2, transcription factor
214719_at	0.00908	0.00227	-3.09304	-2.08627	-1.28474	SLC46A3	solute carrier family 46 member 3
227417_at	3.48e-05	2.53e-06	-4.84639	4.2719	-1.28444	MARC2	mitochondrial amidoxime reducing component 2
230200_at	1.24e-08	1.94e-10	-6.71493	13.377	-1.28405	NSUN6	NOP2/Sun RNA methyltransferase family member 6
210565_at	2.54e-05	1.72e-06	-4.93144	4.6388	-1.28203	GCGR	glucagon receptor
237410_x_at	0.000593	7.95e-05	-4.02997	1.0142	-1.2818
233599_at	0.000917	0.000135	-3.89255	0.51514	-1.28151	LOC728061	hCG2003663
232124_at	8.38e-10	8.4e-12	-7.26401	16.4153	-1.28143	FAM198A	family with sequence similarity 198 member A
236741_at	0.000187	1.96e-05	-4.37521	2.33191	-1.27952	WDR72	WD repeat domain 72
210862_s_at	5.91e-08	1.23e-09	-6.37957	11.5946	-1.27939	SARDH	sarcosine dehydrogenase
226745_at	1.63e-05	1e-06	-5.04936	5.15566	-1.27928	CYP4V2	cytochrome P450 family 4 subfamily V member 2
221563_at	1.11e-06	4.01e-08	-5.71351	8.23681	-1.27866	DUSP10	dual specificity phosphatase 10
1558489_at	2.15e-17	1.89e-20	-10.3841	35.7763	-1.27848
40665_at	0.0268	0.00862	-2.65335	-3.28655	-1.27842	FMO3	flavin containing monooxygenase 3
229819_at	0.00805	0.00195	-3.14013	-1.9478	-1.27815	A1BG	alpha-1-B glycoprotein
222592_s_at	0.000478	6.11e-05	-4.09634	1.26048	-1.27759	ACSL5	acyl-CoA synthetase long-chain family member 5
49452_at	0.000263	2.96e-05	-4.27541	1.94172	-1.27724	ACACB	acetyl-CoA carboxylase beta
210680_s_at	1.52e-05	9.24e-07	-5.06662	5.23211	-1.27661	MASP1	mannan binding lectin serine peptidase 1
229060_at	2.37e-07	6.49e-09	-6.06726	9.98871	-1.27445	YPEL2	yippee like 2
222378_at	5.97e-07	1.92e-08	-5.85782	8.94257	-1.27385
236621_at	0.000235	2.59e-05	-4.30813	2.06883	-1.27249	RPS27	ribosomal protein S27
205892_s_at	0.0219	0.00671	-2.73962	-3.06439	-1.27226	FABP1	fatty acid binding protein 1
237515_at	5.78e-05	4.72e-06	-4.70676	3.68045	-1.27221	TMEM56	transmembrane protein 56
236217_at	1.95e-07	5.11e-09	-6.11259	10.2184	-1.27096	SLC31A1	solute carrier family 31 member 1
214419_s_at	8.22e-05	7.23e-06	-4.60906	3.27483	-1.26858	CYP2C9	cytochrome P450 family 2 subfamily C member 9
220554_at	0.00861	0.00212	-3.11371	-2.02572	-1.2679	SLC22A7	solute carrier family 22 member 7
235299_at	0.000378	4.61e-05	-4.16695	1.5262	-1.26721	SLC41A2	solute carrier family 41 member 2
221589_s_at	2.94e-05	2.06e-06	-4.8919	4.46759	-1.26673	ALDH6A1	aldehyde dehydrogenase 6 family member A1
209457_at	0.000369	4.47e-05	-4.1743	1.55409	-1.26636	DUSP5	dual specificity phosphatase 5
240383_at	0.00161	0.00027	-3.70959	-0.12617	-1.2661	UBE2D3	ubiquitin conjugating enzyme E2 D3
242239_at	0.0007	9.75e-05	-3.97781	0.82305	-1.26445	NSUN6	NOP2/Sun RNA methyltransferase family member 6
1556388_a_at	0.0963	0.0428	-2.03889	-4.67465	-1.26245	LOC100507389	uncharacterized LOC100507389
238447_at	0.00225	0.000409	-3.59515	-0.51368	-1.26205	RBMS3	RNA binding motif single stranded interacting protein 3
243894_at	3.28e-05	2.36e-06	-4.86245	4.34079	-1.26169	SLC41A2	solute carrier family 41 member 2
234139_s_at	7.43e-09	1.07e-10	-6.82044	13.9497	-1.26106	LOC105378749	uncharacterized LOC105378749
223579_s_at	0.0108	0.00281	-3.02537	-2.28194	-1.26006	APOB	apolipoprotein B
215330_at	2.06e-09	2.45e-11	-7.07963	15.3793	-1.2593
222528_s_at	5.27e-08	1.07e-09	-6.40465	11.7259	-1.25911	SLC25A37	solute carrier family 25 member 37
1557459_at	0.000376	4.58e-05	-4.16828	1.53123	-1.25833
207601_at	6.29e-05	5.24e-06	-4.68303	3.58131	-1.25806	SULT1B1	sulfotransferase family 1B member 1
215578_at	1.94e-06	7.76e-08	-5.58153	7.6023	-1.25794
214696_at	6.38e-08	1.34e-09	-6.36301	11.5081	-1.25705	MIR22///MIR22HG	microRNA 22///MIR22 host gene
218935_at	9.1e-09	1.36e-10	-6.77795	13.7184	-1.25686	EHD3	EH domain containing 3
226192_at	0.0129	0.00351	-2.95451	-2.4826	-1.25656	AR	androgen receptor
235652_at	0.000936	0.000139	-3.88599	0.49171	-1.25641
39249_at	3.37e-15	5.43e-18	-9.53969	30.2655	-1.25629	AQP3	aquaporin 3 (Gill blood group)
219281_at	1.28e-06	4.75e-08	-5.67966	8.07305	-1.25449	MSRA	methionine sulfoxide reductase A
208960_s_at	7.41e-06	3.86e-07	-5.25198	6.0656	-1.25354	KLF6	Kruppel like factor 6
204273_at	0.000135	1.32e-05	-4.46828	2.7024	-1.25226	EDNRB	endothelin receptor type B
229567_at	3.27e-17	3.11e-20	-10.3108	35.2925	-1.25127	FITM1	fat storage inducing transmembrane protein 1
242375_x_at	0.00165	0.000278	-3.70151	-0.15388	-1.25101	LOC101929036///PAH	uncharacterized LOC101929036///phenylalanine hydroxylase
221928_at	1.61e-05	9.83e-07	-5.05325	5.17287	-1.24996	ACACB	acetyl-CoA carboxylase beta
202309_at	1.48e-05	8.96e-07	-5.07327	5.26164	-1.24917	MTHFD1	methylenetetrahydrofolate dehydrogenase, cyclohydrolase and formyltetrahydrofolate synthetase 1
238160_at	0.0143	0.00398	-2.9141	-2.59509	-1.24916	ACOT12	acyl-CoA thioesterase 12
213820_s_at	1.06e-07	2.48e-09	-6.24849	10.914	-1.24715	STARD5	StAR related lipid transfer domain containing 5
206527_at	4.43e-05	3.4e-06	-4.78038	3.99059	-1.24684	ABAT	4-aminobutyrate aminotransferase
223280_x_at	0.000247	2.74e-05	-4.29416	2.01447	-1.24639	MS4A6A	membrane spanning 4-domains A6A
1555553_a_at	0.00764	0.00183	-3.15961	-1.88996	-1.24634	SLC22A7	solute carrier family 22 member 7
205730_s_at	5.49e-06	2.7e-07	-5.32684	6.40856	-1.24597	ABLIM3	actin binding LIM protein family member 3
223650_s_at	3.12e-07	8.89e-09	-6.00693	9.68477	-1.24556	NRBF2	nuclear receptor binding factor 2
209459_s_at	0.000537	7.07e-05	-4.05969	1.12406	-1.24367	ABAT	4-aminobutyrate aminotransferase
216238_s_at	0.00143	0.000234	-3.74776	0.00542	-1.24229	FGB	fibrinogen beta chain
212099_at	2.45e-06	1.03e-07	-5.52535	7.33549	-1.24189	RHOB	ras homolog family member B
205158_at	0.000716	0.0001	-3.9711	0.79862	-1.24153	RNASE4	ribonuclease A family member 4
234980_at	3.34e-06	1.48e-07	-5.4506	6.98355	-1.23603	TMEM56	transmembrane protein 56
224989_at	3.83e-05	2.86e-06	-4.81955	4.15716	-1.23528	SMIM14	small integral membrane protein 14
43427_at	0.000167	1.7e-05	-4.40874	2.46462	-1.23527	ACACB	acetyl-CoA carboxylase beta
233645_s_at	2e-15	2.89e-18	-9.63491	30.8793	-1.23432	C1RL	complement C1r subcomponent like
208116_s_at	0.00108	0.000164	-3.84179	0.33455	-1.23412	MAN1A1	mannosidase alpha class 1A member 1
218024_at	1.04e-08	1.57e-10	-6.75201	13.5777	-1.23363	MPC1	mitochondrial pyruvate carrier 1
206177_s_at	0.024	0.00751	-2.70105	-3.16453	-1.23226	ARG1	arginase 1
227297_at	0.000181	1.88e-05	-4.38538	2.37207	-1.23084	ITGA9	integrin subunit alpha 9
1552281_at	0.000102	9.45e-06	-4.5473	3.02191	-1.23053	SLC39A5	solute carrier family 39 member 5
209460_at	0.000774	0.00011	-3.9464	0.70896	-1.23039	ABAT	4-aminobutyrate aminotransferase
207007_at	0.0298	0.00984	-2.60662	-3.40411	-1.22966	NR1I3	nuclear receptor subfamily 1 group I member 3
236548_at	0.00406	0.000842	-3.39029	-1.18068	-1.22679	GIPC2	GIPC PDZ domain containing family member 2
205627_at	0.00161	0.000269	-3.7101	-0.12442	-1.22656	CDA	cytidine deaminase
229491_at	7.29e-06	3.78e-07	-5.25649	6.08615	-1.22633	SLC9B2	solute carrier family 9 member B2
209660_at	0.00396	0.000816	-3.3994	-1.15176	-1.22572	TTR	transthyretin
235065_at	1.93e-06	7.71e-08	-5.58301	7.6094	-1.22543	GAREM1	GRB2 associated regulator of MAPK1 subtype 1
226460_at	2.81e-05	1.95e-06	-4.90447	4.52192	-1.22476	FNIP2	folliculin interacting protein 2
220892_s_at	0.00124	0.000195	-3.79627	0.17436	-1.22424	PSAT1	phosphoserine aminotransferase 1
200854_at	1.35e-09	1.48e-11	-7.16656	15.8658	-1.22413	NCOR1	nuclear receptor corepressor 1
204755_x_at	0.0113	0.00298	-3.0072	-2.3338	-1.2227	HLF	HLF, PAR bZIP transcription factor
207621_s_at	8.28e-06	4.39e-07	-5.2249	5.9424	-1.22179	PEMT	phosphatidylethanolamine N-methyltransferase
206101_at	0.00371	0.000753	-3.42264	-1.07765	-1.22172	ECM2	extracellular matrix protein 2
222121_at	9.52e-08	2.17e-09	-6.27373	11.0443	-1.21893	ARHGEF26	Rho guanine nucleotide exchange factor 26
224589_at	0.0436	0.0158	-2.43396	-3.82153	-1.216	XIST	X inactive specific transcript (non-protein coding)
231667_at	0.000261	2.93e-05	-4.27807	1.95204	-1.216	SLC39A5	solute carrier family 39 member 5
214235_at	0.00727	0.00172	-3.17813	-1.83468	-1.21585	CYP3A5	cytochrome P450 family 3 subfamily A member 5
242662_at	0.00309	0.000604	-3.48599	-0.87341	-1.21559	PCSK6	proprotein convertase subtilisin/kexin type 6
202003_s_at	2.59e-05	1.77e-06	-4.92594	4.61493	-1.21507	ACAA2	acetyl-CoA acyltransferase 2
242784_at	1.74e-14	3.59e-17	-9.2524	28.4274	-1.21489
1556451_at	8.85e-16	1.12e-18	-9.77771	31.8035	-1.21314
222316_at	0.00032	3.75e-05	-4.21791	1.72033	-1.2123
1563658_a_at	4.84e-16	5.77e-19	-9.87713	32.4498	-1.21225	SYT9	synaptotagmin 9
224724_at	0.0043	0.000903	-3.37022	-1.24417	-1.21207	SULF2	sulfatase 2
52940_at	1.41e-05	8.39e-07	-5.0874	5.32441	-1.2093	SIGIRR	single Ig and TIR domain containing
243634_at	9.81e-05	8.98e-06	-4.55914	3.07019	-1.20927	SMIM14	small integral membrane protein 14
206496_at	0.0302	0.00998	-2.60151	-3.41684	-1.20823	FMO3	flavin containing monooxygenase 3
212230_at	2.21e-08	3.77e-10	-6.59522	12.7341	-1.2074	PLPP3	phospholipid phosphatase 3
235061_at	0.000534	7.01e-05	-4.06178	1.13183	-1.20691	PPM1K	protein phosphatase, Mg2+/Mn2+ dependent 1K
211610_at	7.66e-15	1.5e-17	-9.38545	29.2761	-1.20654	KLF6	Kruppel like factor 6
235591_at	0.0151	0.00427	-2.8911	-2.65847	-1.20517	SSTR1	somatostatin receptor 1
203799_at	1.86e-05	1.18e-06	-5.0142	5.00058	-1.2044	LY75-CD302///CD302///LY75	LY75-CD302 readthrough///CD302 molecule///lymphocyte antigen 75
221662_s_at	0.00691	0.00162	-3.19676	-1.77876	-1.20365	SLC22A7	solute carrier family 22 member 7
215966_x_at	5.14e-06	2.5e-07	-5.34291	6.48269	-1.20351	GK3P	glycerol kinase 3 pseudogene
219970_at	0.00105	0.000161	-3.84771	0.35554	-1.20298	GIPC2	GIPC PDZ domain containing family member 2
207200_at	0.0496	0.0186	-2.37296	-3.96258	-1.20296	OTC	ornithine carbamoyltransferase
224061_at	6.82e-05	5.78e-06	-4.66043	3.48724	-1.2026	INMT	indolethylamine N-methyltransferase
215990_s_at	5.01e-08	9.99e-10	-6.41732	11.7923	-1.20218	BCL6	B-cell CLL/lymphoma 6
203547_at	1.94e-07	5.09e-09	-6.11354	10.2232	-1.19987	CD4	CD4 molecule
1561336_at	5.58e-12	2.54e-14	-8.22456	22.0441	-1.19974	DNASE1L3	deoxyribonuclease 1 like 3
204845_s_at	0.0096	0.00243	-3.0718	-2.14811	-1.19828	ENPEP	glutamyl aminopeptidase
222162_s_at	0.00073	0.000103	-3.96467	0.77523	-1.19754	ADAMTS1	ADAM metallopeptidase with thrombospondin type 1 motif 1
229299_at	0.000514	6.69e-05	-4.0736	1.17573	-1.19747	NADK2	NAD kinase 2, mitochondrial
214056_at	2.22e-06	9.13e-08	-5.54892	7.44721	-1.19704	MCL1	BCL2 family apoptosis regulator
223099_s_at	4.74e-07	1.44e-08	-5.91403	9.22086	-1.19657	LOC100507577///LONP2	uncharacterized LOC100507577///lon peptidase 2, peroxisomal
231358_at	8.67e-09	1.29e-10	-6.78814	13.7738	-1.19647	MRO	maestro
238762_at	1.89e-05	1.2e-06	-5.01014	4.98273	-1.1964	MTHFD2L	methylenetetrahydrofolate dehydrogenase (NADP+ dependent) 2-like
230554_at	0.0321	0.0108	-2.57453	-3.4837	-1.19601	ACSM2A	acyl-CoA synthetase medium-chain family member 2A
213321_at	1.07e-10	7.95e-13	-7.66182	18.7016	-1.19582	BCKDHB	branched chain keto acid dehydrogenase E1 subunit beta
63825_at	1.25e-05	7.27e-07	-5.11798	5.46076	-1.19551	ABHD2	abhydrolase domain containing 2
209343_at	0.00399	0.000824	-3.39685	-1.15987	-1.19541	EFHD1	EF-hand domain family member D1
221803_s_at	6.19e-08	1.29e-09	-6.36969	11.543	-1.19498	NRBF2	nuclear receptor binding factor 2
220507_s_at	0.0172	0.00499	-2.83974	-2.79837	-1.19363	UPB1	beta-ureidopropionase 1
242702_at	5.07e-06	2.46e-07	-5.34626	6.49813	-1.19328	MMAA	methylmalonic aciduria (cobalamin deficiency) cblA type
207008_at	7.39e-08	1.61e-09	-6.32935	11.3327	-1.193	CXCR2	C-X-C motif chemokine receptor 2
204753_s_at	0.0193	0.00574	-2.79266	-2.92455	-1.19139	HLF	HLF, PAR bZIP transcription factor
213279_at	0.000159	1.61e-05	-4.42178	2.51648	-1.19137	DHRS1	dehydrogenase/reductase 1
218613_at	0.000116	1.09e-05	-4.51318	2.88339	-1.19107	PSD3	pleckstrin and Sec7 domain containing 3
207414_s_at	0.00029	3.33e-05	-4.24706	1.83227	-1.19088	LOC100507472///PCSK6	uncharacterized LOC100507472///proprotein convertase subtilisin/kexin type 6
211681_s_at	9.76e-05	8.92e-06	-4.56056	3.076	-1.18995	PDLIM5	PDZ and LIM domain 5
225762_x_at	1.83e-10	1.48e-12	-7.55748	18.0954	-1.18878	RNA45S5	RNA, 45S pre-ribosomal 5
1562863_at	1.1e-05	6.2e-07	-5.15199	5.61314	-1.18727
214308_s_at	0.000831	0.00012	-3.92373	0.62711	-1.1871	HGD	homogentisate 1,2-dioxygenase
208892_s_at	0.000134	1.31e-05	-4.47009	2.70966	-1.18648	DUSP6	dual specificity phosphatase 6
203642_s_at	0.000191	2.01e-05	-4.36924	2.30833	-1.18643	COBLL1	cordon-bleu WH2 repeat protein like 1
210888_s_at	0.000317	3.71e-05	-4.22064	1.73078	-1.18512	ITIH1	inter-alpha-trypsin inhibitor heavy chain 1
226109_at	2.52e-06	1.06e-07	-5.51843	7.30276	-1.18483	C21orf91	chromosome 21 open reading frame 91
211074_at	5.2e-06	2.53e-07	-5.33985	6.46856	-1.18427	FOLR1	folate receptor 1
203435_s_at	0.0194	0.00581	-2.78884	-2.93473	-1.18362	MME	membrane metallo-endopeptidase
218285_s_at	2.52e-05	1.71e-06	-4.93322	4.64653	-1.1811	BDH2	3-hydroxybutyrate dehydrogenase, type 2
213920_at	0.0227	0.007	-2.72504	-3.1024	-1.18036	CUX2	cut like homeobox 2
241716_at	0.0143	0.00398	-2.91415	-2.59494	-1.17971	HSPD1	heat shock protein family D (Hsp60) member 1
203641_s_at	0.00028	3.19e-05	-4.25726	1.87159	-1.1795	COBLL1	cordon-bleu WH2 repeat protein like 1
225616_at	1.02e-06	3.63e-08	-5.73314	8.33207	-1.17745	SPRYD4	SPRY domain containing 4
207576_x_at	6.27e-09	8.77e-11	-6.85605	14.1442	-1.17729	OXT	oxytocin/neurophysin I prepropeptide
208893_s_at	9.14e-05	8.21e-06	-4.57986	3.15489	-1.17676	DUSP6	dual specificity phosphatase 6
205675_at	0.0143	0.00399	-2.91297	-2.59823	-1.17642	MTTP	microsomal triglyceride transfer protein
1553583_a_at	0.0291	0.00953	-2.61772	-3.37637	-1.17631	THRSP	thyroid hormone responsive
233903_s_at	2.6e-06	1.11e-07	-5.50978	7.26192	-1.17621	ARHGEF26	Rho guanine nucleotide exchange factor 26
212110_at	2.36e-06	9.76e-08	-5.53532	7.3827	-1.17335	SLC39A14	solute carrier family 39 member 14
211056_s_at	3.37e-05	2.43e-06	-4.85525	4.30991	-1.17332	SRD5A1	steroid 5 alpha-reductase 1
224954_at	7.41e-05	6.4e-06	-4.6372	3.39094	-1.17325	MIR6778///SHMT1	microRNA 6778///serine hydroxymethyltransferase 1
202340_x_at	2.24e-09	2.71e-11	-7.06214	15.2818	-1.17284	NR4A1	nuclear receptor subfamily 4 group A member 1
203747_at	2.57e-12	1.02e-14	-8.37099	22.9329	-1.17229	AQP3	aquaporin 3 (Gill blood group)
209581_at	0.00169	0.000286	-3.69314	-0.18252	-1.17212	PLA2G16	phospholipase A2 group XVI
215501_s_at	2.03e-06	8.22e-08	-5.56994	7.54709	-1.1718	DUSP10	dual specificity phosphatase 10
216320_x_at	6.94e-05	5.92e-06	-4.65517	3.46543	-1.17172	MST1	macrophage stimulating 1
244677_at	0.000316	3.69e-05	-4.22145	1.7339	-1.17088	MIR6883///PER1	microRNA 6883///period circadian clock 1
224209_s_at	0.0246	0.00773	-2.69093	-3.1906	-1.16917	GDA	guanine deaminase
217504_at	0.0138	0.0038	-2.92862	-2.55484	-1.16889	ABCA6	ATP binding cassette subfamily A member 6
205614_x_at	4.35e-05	3.33e-06	-4.78541	4.01192	-1.16877	MST1	macrophage stimulating 1
220107_s_at	1.74e-13	4.68e-16	-8.85636	25.9297	-1.16808	ZC2HC1C	zinc finger C2HC-type containing 1C
243929_at	7.1e-08	1.53e-09	-6.33828	11.3792	-1.16761
205371_s_at	0.000223	2.43e-05	-4.32396	2.13061	-1.16747	DBT	dihydrolipoamide branched chain transacylase E2
207655_s_at	3.81e-05	2.83e-06	-4.82158	4.16584	-1.16679	BLNK	B-cell linker
202959_at	8.05e-06	4.26e-07	-5.2315	5.97238	-1.16554	MUT	methylmalonyl-CoA mutase
231671_at	1.37e-05	8.09e-07	-5.09533	5.3597	-1.16524	FGA	fibrinogen alpha chain
221833_at	0.000116	1.1e-05	-4.51281	2.88192	-1.1649	LOC100507577///LONP2///SIAH1	uncharacterized LOC100507577///lon peptidase 2, peroxisomal///siah E3 ubiquitin protein ligase 1
1554668_a_at	6.06e-05	5e-06	-4.69365	3.62562	-1.16435	FAM151A	family with sequence similarity 151 member A
213626_at	1.03e-05	5.73e-07	-5.16878	5.68866	-1.16428	CBR4	carbonyl reductase 4
216910_at	0.0267	0.00856	-2.65543	-3.28125	-1.16328	XPNPEP2	X-prolyl aminopeptidase 2
213245_at	0.00294	0.000566	-3.50443	-0.8133	-1.16272	ADCY1	adenylate cyclase 1
206484_s_at	0.0533	0.0203	-2.33868	-4.04035	-1.16054	XPNPEP2	X-prolyl aminopeptidase 2
212226_s_at	5e-07	1.54e-08	-5.90151	9.1587	-1.16034	PLPP3	phospholipid phosphatase 3
226682_at	0.000174	1.79e-05	-4.39695	2.41787	-1.15952	RORA	RAR related orphan receptor A
223467_at	0.002	0.000354	-3.63508	-0.37969	-1.15765	RASD1	ras related dexamethasone induced 1
231705_at	1.88e-09	2.18e-11	-7.09983	15.492	-1.15743	RIDA	reactive intermediate imine deaminase A homolog
206386_at	0.0734	0.0303	-2.18145	-4.38333	-1.15722	SERPINA7	serpin family A member 7
211621_at	0.000835	0.000121	-3.92227	0.62184	-1.15694	AR	androgen receptor
223922_x_at	3.76e-05	2.78e-06	-4.82524	4.18143	-1.15684	MS4A6A	membrane spanning 4-domains A6A
241916_at	2.38e-06	9.86e-08	-5.53332	7.37322	-1.15674
211572_s_at	2.35e-05	1.56e-06	-4.95308	4.73293	-1.15646	SLC23A2	solute carrier family 23 member 2
216813_at	3.64e-06	1.65e-07	-5.42801	6.87788	-1.15573
227388_at	0.0034	0.000678	-3.453	-0.9802	-1.15543	TUSC1	tumor suppressor candidate 1
231824_at	5.86e-09	8.13e-11	-6.86939	14.2172	-1.15538	LARP1B	La ribonucleoprotein domain family member 1B
205208_at	0.0398	0.0141	-2.47614	-3.72202	-1.15526	ALDH1L1	aldehyde dehydrogenase 1 family member L1
242093_at	1.57e-05	9.54e-07	-5.05972	5.20153	-1.15493	SYTL5	synaptotagmin like 5
202431_s_at	0.0101	0.00259	-3.0514	-2.20715	-1.15473	MYC	v-myc avian myelocytomatosis viral oncogene homolog
243302_at	2.2e-09	2.66e-11	-7.06546	15.3003	-1.15411
204844_at	0.00484	0.00104	-3.32821	-1.37596	-1.15376	ENPEP	glutamyl aminopeptidase
203645_s_at	0.00268	0.000504	-3.53667	-0.70759	-1.15327	CD163	CD163 molecule
222486_s_at	9.9e-05	9.08e-06	-4.55654	3.05958	-1.1517	ADAMTS1	ADAM metallopeptidase with thrombospondin type 1 motif 1
203680_at	5.13e-05	4.07e-06	-4.74012	3.82053	-1.15121	PRKAR2B	protein kinase cAMP-dependent type II regulatory subunit beta
239227_at	0.00884	0.00219	-3.10373	-2.055	-1.15096
233506_at	2.02e-07	5.34e-09	-6.10411	10.1754	-1.15065
208290_s_at	2.57e-05	1.75e-06	-4.92807	4.62415	-1.14895	EIF5	eukaryotic translation initiation factor 5
1553341_at	3.21e-07	9.23e-09	-5.9998	9.64898	-1.1487	UROC1	urocanate hydratase 1
201465_s_at	1.48e-06	5.67e-08	-5.6447	7.90466	-1.14862	JUN	Jun proto-oncogene, AP-1 transcription factor subunit
218921_at	1.51e-05	9.16e-07	-5.06861	5.24094	-1.1482	SIGIRR	single Ig and TIR domain containing
202085_at	3.51e-08	6.55e-10	-6.49474	12.2001	-1.14818	TJP2	tight junction protein 2
230792_at	3.43e-08	6.35e-10	-6.5004	12.23	-1.14774	FAAH2	fatty acid amide hydrolase 2
223844_at	7.54e-14	1.85e-16	-9.00031	26.8325	-1.14701	ADAMTS13	ADAM metallopeptidase with thrombospondin type 1 motif 13
230318_at	0.00227	0.000413	-3.59278	-0.52159	-1.14678	SERPINA1	serpin family A member 1
232472_at	0.00121	0.00019	-3.80399	0.2014	-1.14639
202949_s_at	0.00448	0.00095	-3.35534	-1.29104	-1.14582	FHL2	four and a half LIM domains 2
204462_s_at	0.00114	0.000177	-3.82276	0.26739	-1.14487	SLC16A2	solute carrier family 16 member 2
236383_at	2.34e-10	1.93e-12	-7.51356	17.8416	-1.14483
231591_at	1.73e-05	1.08e-06	-5.03284	5.08271	-1.14398	DMGDH	dimethylglycine dehydrogenase
230300_at	0.000191	2.01e-05	-4.36953	2.3095	-1.1438	PSMA5	proteasome subunit alpha 5
207401_at	6.4e-05	5.35e-06	-4.67822	3.56127	-1.1434	PROX1	prospero homeobox 1
1553972_a_at	0.000777	0.000111	-3.94488	0.70347	-1.14337	CBS	cystathionine-beta-synthase
230659_at	2.13e-05	1.38e-06	-4.97936	4.84771	-1.14258
218552_at	6.72e-05	5.67e-06	-4.6648	3.50542	-1.14252	ECHDC2	enoyl-CoA hydratase domain containing 2
206115_at	1.32e-05	7.74e-07	-5.10473	5.40162	-1.14242	EGR3	early growth response 3
205568_at	0.0514	0.0194	-2.35634	-4.00041	-1.14156	AQP9	aquaporin 9
241914_s_at	0.0365	0.0126	-2.51708	-3.62391	-1.13952	ACSM2B///ACSM2A	acyl-CoA synthetase medium-chain family member 2B///acyl-CoA synthetase medium-chain family member 2A
205649_s_at	0.00157	0.000261	-3.71864	-0.09509	-1.13951	FGA	fibrinogen alpha chain
213649_at	2.73e-05	1.88e-06	-4.91202	4.55456	-1.13917	SRSF7	serine and arginine rich splicing factor 7
207883_s_at	0.000467	5.94e-05	-4.10365	1.28782	-1.13907	TFR2	transferrin receptor 2
209821_at	0.00295	0.000569	-3.50257	-0.81939	-1.13859	IL33	interleukin 33
217973_at	0.00385	0.000788	-3.4095	-1.1196	-1.13855	DCXR	dicarbonyl and L-xylulose reductase
201425_at	1.52e-06	5.85e-08	-5.63819	7.87341	-1.13762	ALDH2	aldehyde dehydrogenase 2 family (mitochondrial)
216316_x_at	1.52e-07	3.79e-09	-6.16889	10.5053	-1.13717	GK6P	glycerol kinase 6 pseudogene
213146_at	6.04e-10	5.79e-12	-7.32761	16.7763	-1.13667	KDM6B	lysine demethylase 6B
227081_at	0.00103	0.000157	-3.85345	0.37587	-1.13433	DNALI1	dynein axonemal light intermediate chain 1
218843_at	1.39e-05	8.27e-07	-5.09061	5.33871	-1.13152	FNDC4	fibronectin type III domain containing 4
207498_s_at	0.0332	0.0112	-2.5597	-3.5202	-1.13117	LOC101929829///CYP2D6///CYP2D7	cytochrome P450 family 2 subfamily D member 6 pseudogene///cytochrome P450 family 2 subfamily D member 6///cytochrome P450 family 2 subfamily D member 7 (gene/pseudogene)
1558279_a_at	8.51e-05	7.53e-06	-4.59972	3.23639	-1.13095	KDSR	3-ketodihydrosphingosine reductase
231018_at	6.56e-05	5.5e-06	-4.67169	3.53409	-1.13077	PALM3	paralemmin 3
220524_at	1.79e-08	2.99e-10	-6.63711	12.9582	-1.13034	EPB41L4B	erythrocyte membrane protein band 4.1 like 4B
203355_s_at	0.0022	0.000396	-3.60437	-0.48287	-1.13025	PSD3	pleckstrin and Sec7 domain containing 3
206515_at	0.00494	0.00107	-3.32031	-1.40059	-1.12988	CYP4F3	cytochrome P450 family 4 subfamily F member 3
223605_at	0.0279	0.00905	-2.63609	-3.3302	-1.12982	SLC25A18	solute carrier family 25 member 18
233648_at	0.00933	0.00234	-3.08277	-2.11622	-1.12765
212486_s_at	1.03e-05	5.74e-07	-5.16823	5.68618	-1.12759	FYN	FYN proto-oncogene, Src family tyrosine kinase
231483_at	0.0354	0.0122	-2.53017	-3.59223	-1.12569	LOC100505985	uncharacterized LOC100505985
1555411_a_at	5.33e-08	1.09e-09	-6.40207	11.7123	-1.12532	CCNL1	cyclin L1
1554283_at	1.03e-10	7.47e-13	-7.67207	18.7613	-1.12528	NOCT	nocturnin
242191_at	0.00199	0.000351	-3.63783	-0.37039	-1.12436
201963_at	0.000909	0.000134	-3.89522	0.52473	-1.12433	ACSL1	acyl-CoA synthetase long-chain family member 1
215029_at	5.59e-05	4.51e-06	-4.71683	3.72266	-1.1237
206010_at	0.0188	0.00559	-2.80157	-2.90084	-1.12255	HABP2	hyaluronan binding protein 2
204608_at	7.74e-05	6.73e-06	-4.62555	3.34282	-1.12168	ASL	argininosuccinate lyase
203472_s_at	0.000229	2.51e-05	-4.31609	2.09988	-1.12126	SLCO2B1	solute carrier organic anion transporter family member 2B1
1555122_at	4.76e-11	3.06e-13	-7.81976	19.6274	-1.12094	ADGRA3	adhesion G protein-coupled receptor A3
224917_at	0.00499	0.00108	-3.3169	-1.4112	-1.1207	MIR21///VMP1	microRNA 21///vacuole membrane protein 1
200879_s_at	2.51e-07	6.94e-09	-6.05447	9.92409	-1.12048	EPAS1	endothelial PAS domain protein 1
204057_at	1.61e-05	9.9e-07	-5.05176	5.16631	-1.12044	IRF8	interferon regulatory factor 8
207978_s_at	6.58e-10	6.35e-12	-7.31191	16.687	-1.11924	NR4A3	nuclear receptor subfamily 4 group A member 3
219076_s_at	6.58e-05	5.52e-06	-4.67088	3.5307	-1.11844	PXMP2	peroxisomal membrane protein 2
228004_at	2.96e-05	2.07e-06	-4.8905	4.46154	-1.11733	LINC00261	long intergenic non-protein coding RNA 261
225792_at	1.61e-05	9.89e-07	-5.05204	5.16754	-1.11508	HOOK1	hook microtubule tethering protein 1
201562_s_at	0.00263	0.000493	-3.54332	-0.6857	-1.11407	SORD	sorbitol dehydrogenase
218688_at	0.00108	0.000166	-3.83941	0.32616	-1.11348	TKFC	triokinase and FMN cyclase
203854_at	6.78e-05	5.74e-06	-4.66226	3.49487	-1.11288	CFI	complement factor I
217858_s_at	0.0341	0.0116	-2.54724	-3.55069	-1.11281	ARMCX3	armadillo repeat containing, X-linked 3
210614_at	0.00853	0.00209	-3.11759	-2.01432	-1.11248	TTPA	alpha tocopherol transfer protein
212923_s_at	9.43e-10	9.67e-12	-7.23978	16.2783	-1.11075	PXDC1	PX domain containing 1
204011_at	9.86e-07	3.5e-08	-5.74056	8.36816	-1.11047	SPRY2	sprouty RTK signaling antagonist 2
1558447_at	9.5e-10	9.75e-12	-7.23836	16.2703	-1.11045
227865_at	7.11e-07	2.37e-08	-5.81745	8.74393	-1.11028	IDNK	IDNK, gluconokinase
225919_s_at	1.1e-05	6.22e-07	-5.1512	5.60961	-1.10983	C9orf72	chromosome 9 open reading frame 72
210077_s_at	1.32e-13	3.35e-16	-8.90823	26.2543	-1.10789	SRSF5	serine and arginine rich splicing factor 5
230964_at	0.00274	0.00052	-3.52792	-0.7364	-1.10683	FREM2	FRAS1 related extracellular matrix protein 2
229521_at	5.42e-05	4.35e-06	-4.72492	3.7566	-1.10548	CCDC71L	coiled-coil domain containing 71-like
236685_at	2.03e-05	1.3e-06	-4.99229	4.90434	-1.10512
205079_s_at	0.000899	0.000132	-3.89908	0.53855	-1.10453	MPDZ	multiple PDZ domain crumbs cell polarity complex component
215498_s_at	6.21e-08	1.3e-09	-6.36874	11.538	-1.10407	LOC100996792///MAP2K3	dual specificity mitogen-activated protein kinase kinase 3///mitogen-activated protein kinase kinase 3
215049_x_at	0.00364	0.000735	-3.42984	-1.0546	-1.10393	CD163	CD163 molecule
210739_x_at	1.07e-06	3.84e-08	-5.72187	8.27733	-1.10351	SLC4A4	solute carrier family 4 member 4
209395_at	0.254	0.148	-1.45305	-5.67177	-1.10205	CHI3L1	chitinase 3 like 1
214069_at	0.0257	0.00816	-2.6721	-3.23882	-1.10195	ACSM2B///ACSM2A	acyl-CoA synthetase medium-chain family member 2B///acyl-CoA synthetase medium-chain family member 2A
244385_at	0.000154	1.55e-05	-4.43052	2.55131	-1.10168	KDM4C	lysine demethylase 4C
240165_at	3.63e-05	2.67e-06	-4.83422	4.21982	-1.10157
202502_at	2.49e-06	1.05e-07	-5.52119	7.31584	-1.10062	ACADM	acyl-CoA dehydrogenase, C-4 to C-12 straight chain
1557924_s_at	3.04e-07	8.63e-09	-6.0127	9.71374	-1.10042	ALPL	alkaline phosphatase, liver/bone/kidney
209237_s_at	4e-07	1.19e-08	-5.95031	9.40142	-1.09973	SLC23A2	solute carrier family 23 member 2
241200_x_at	3.76e-15	6.34e-18	-9.51636	30.1154	-1.09946
240422_at	0.000946	0.000141	-3.88275	0.48015	-1.0988
208961_s_at	4.79e-06	2.29e-07	-5.36079	6.56531	-1.09819	KLF6	Kruppel like factor 6
242496_at	0.0382	0.0134	-2.49501	-3.677	-1.09797	ART4	ADP-ribosyltransferase 4 (Dombrock blood group)
231398_at	0.0993	0.0444	-2.02284	-4.70626	-1.09771	SLC22A7	solute carrier family 22 member 7
210667_s_at	2.48e-05	1.67e-06	-4.93766	4.66582	-1.09733	C21orf33	chromosome 21 open reading frame 33
213663_s_at	1.23e-10	9.34e-13	-7.63502	18.5454	-1.0973	FAM134B	family with sequence similarity 134 member B
234361_at	0.00267	0.000502	-3.53778	-0.70397	-1.09678	CREB3L3	cAMP responsive element binding protein 3 like 3
223798_at	0.000821	0.000118	-3.92751	0.64073	-1.09504	SLC41A2	solute carrier family 41 member 2
233952_s_at	2.53e-06	1.07e-07	-5.51695	7.29576	-1.09478	ZBTB21	zinc finger and BTB domain containing 21
206359_at	8.48e-12	4.24e-14	-8.14221	21.5476	-1.09271	SOCS3	suppressor of cytokine signaling 3
213813_x_at	6.86e-05	5.83e-06	-4.6585	3.47924	-1.09079
242751_at	0.0105	0.00272	-3.0362	-2.2509	-1.09024
223319_at	1.68e-05	1.04e-06	-5.04172	5.12188	-1.0895	GPHN	gephyrin
203242_s_at	5.18e-05	4.11e-06	-4.73769	3.81028	-1.08828	PDLIM5	PDZ and LIM domain 5
206539_s_at	7.78e-06	4.07e-07	-5.24078	6.01457	-1.08799	CYP4F12	cytochrome P450 family 4 subfamily F member 12
209712_at	8.11e-08	1.8e-09	-6.3088	11.226	-1.08677	SLC35D1	solute carrier family 35 member D1
232072_at	6.22e-18	4.9e-21	-10.5828	37.0935	-1.08632	NAAA	N-acylethanolamine acid amidase
215074_at	1.75e-08	2.92e-10	-6.64157	12.9822	-1.08606	MYO1B	myosin IB
230316_at	0.0249	0.00787	-2.6847	-3.20658	-1.08565	SEC14L2	SEC14 like lipid binding 2
230109_at	3.39e-06	1.51e-07	-5.4464	6.96388	-1.08554	PDE7B	phosphodiesterase 7B
227962_at	4.7e-05	3.67e-06	-4.76353	3.91928	-1.0841	ACOX1	acyl-CoA oxidase 1
204120_s_at	0.0002	2.12e-05	-4.3558	2.25544	-1.08364	ADK	adenosine kinase
205876_at	2.2e-11	1.24e-13	-7.96861	20.5089	-1.08246	LIFR	leukemia inhibitory factor receptor alpha
206292_s_at	0.0656	0.0264	-2.23679	-4.2652	-1.08224	SULT2A1	sulfotransferase family 2A member 1
235350_at	9.72e-05	8.87e-06	-4.56194	3.08161	-1.08098	C4orf19	chromosome 4 open reading frame 19
219087_at	0.0355	0.0122	-2.52866	-3.59589	-1.0799	ASPN	asporin
205412_at	2.36e-05	1.56e-06	-4.95253	4.73054	-1.0791	ACAT1	acetyl-CoA acetyltransferase 1
210762_s_at	1.93e-05	1.23e-06	-5.00426	4.95688	-1.07861	DLC1	DLC1 Rho GTPase activating protein
216033_s_at	9.3e-05	8.39e-06	-4.57473	3.13389	-1.07824	FYN	FYN proto-oncogene, Src family tyrosine kinase
243543_at	0.00339	0.000676	-3.45384	-0.97747	-1.07815
205863_at	2.97e-11	1.8e-13	-7.90669	20.1412	-1.07712	S100A12	S100 calcium binding protein A12
230711_at	8.17e-09	1.2e-10	-6.8004	13.8405	-1.07663
242657_at	5.27e-07	1.64e-08	-5.88919	9.09767	-1.07633
209209_s_at	7.74e-05	6.73e-06	-4.62553	3.34274	-1.07592	FERMT2	fermitin family member 2
1553513_at	6.02e-16	7.27e-19	-9.84237	32.2236	-1.07586	VNN3	vanin 3
244826_at	0.00625	0.00143	-3.23413	-1.66574	-1.07507
213524_s_at	0.0175	0.00513	-2.83031	-2.82379	-1.07483	G0S2	G0/G1 switch 2
242963_at	1.71e-05	1.06e-06	-5.03658	5.09918	-1.07461	SGMS2	sphingomyelin synthase 2
209357_at	0.000621	8.42e-05	-4.01524	0.96002	-1.07418	CITED2	Cbp/p300 interacting transactivator with Glu/Asp rich carboxy-terminal domain 2
230143_at	6.44e-09	9.06e-11	-6.85016	14.112	-1.07411	RNF165	ring finger protein 165
216696_s_at	0.000679	9.39e-05	-3.98722	0.8574	-1.07326	PRODH2	proline dehydrogenase 2
206132_at	2.13e-09	2.55e-11	-7.07264	15.3403	-1.0726	MCC	mutated in colorectal cancers
219803_at	0.0161	0.0046	-2.86611	-2.72682	-1.07204	ANGPTL3	angiopoietin like 3
211248_s_at	2.68e-05	1.84e-06	-4.91706	4.57641	-1.07112	CHRD	chordin
222982_x_at	5.35e-07	1.67e-08	-5.88554	9.07957	-1.07063	SLC38A2	solute carrier family 38 member 2
210105_s_at	6.66e-05	5.61e-06	-4.66714	3.51514	-1.07062	FYN	FYN proto-oncogene, Src family tyrosine kinase
207687_at	0.000203	2.17e-05	-4.35094	2.23633	-1.07007	INHBC	inhibin beta C subunit
235985_at	0.000798	0.000114	-3.93625	0.67227	-1.06957
209122_at	0.000262	2.95e-05	-4.27685	1.94733	-1.06943	PLIN2	perilipin 2
235766_x_at	0.000689	9.57e-05	-3.98243	0.83989	-1.06874	RAB27A	RAB27A, member RAS oncogene family
224348_s_at	3.01e-05	2.12e-06	-4.88569	4.4408	-1.06845	HOTS	H19 opposite tumor suppressor
204264_at	5.56e-05	4.48e-06	-4.71826	3.72865	-1.0683	CPT2	carnitine palmitoyltransferase 2
223587_s_at	0.00213	0.000381	-3.6147	-0.44824	-1.06528	AMN	amnion associated transmembrane protein
235629_at	0.00683	0.0016	-3.20091	-1.76628	-1.06495
220751_s_at	0.00122	0.000192	-3.80082	0.1903	-1.06382	FAXDC2	fatty acid hydroxylase domain containing 2
224590_at	0.21	0.116	-1.57942	-5.4842	-1.06363	XIST	X inactive specific transcript (non-protein coding)
214475_x_at	0.000127	1.22e-05	-4.48674	2.77663	-1.06273	CAPN3	calpain 3
226807_at	7.92e-05	6.92e-06	-4.61934	3.31718	-1.0623	ZFP1	ZFP1 zinc finger protein
209959_at	1.08e-06	3.92e-08	-5.71784	8.25782	-1.0619	NR4A3	nuclear receptor subfamily 4 group A member 3
243843_at	3.3e-07	9.52e-09	-5.99384	9.6191	-1.06123	N4BP2L1	NEDD4 binding protein 2 like 1
219147_s_at	2.81e-06	1.21e-07	-5.49189	7.1775	-1.06086	NMRK1	nicotinamide riboside kinase 1
244447_at	6.03e-05	4.97e-06	-4.69478	3.63037	-1.0606
1554491_a_at	0.0645	0.0259	-2.24465	-4.24818	-1.05992	SERPINC1	serpin family C member 1
240120_at	0.00922	0.00231	-3.08741	-2.10269	-1.05962
222128_at	0.000734	0.000103	-3.96273	0.7682	-1.0588	NSUN6	NOP2/Sun RNA methyltransferase family member 6
1554980_a_at	1.1e-05	6.25e-07	-5.15035	5.60579	-1.05867	ATF3	activating transcription factor 3
209596_at	0.0127	0.00344	-2.96133	-2.46348	-1.05766	MXRA5	matrix remodeling associated 5
1559239_s_at	7.97e-10	7.89e-12	-7.27476	16.4762	-1.05762	ACAT1	acetyl-CoA acetyltransferase 1
235086_at	0.000121	1.16e-05	-4.50019	2.83088	-1.05755	THBS1	thrombospondin 1
216223_at	0.00545	0.00121	-3.28404	-1.51293	-1.05704	CPN2	carboxypeptidase N subunit 2
206535_at	0.0612	0.0242	-2.27114	-4.19046	-1.05659	SLC2A2	solute carrier family 2 member 2
242837_at	0.00179	0.000308	-3.67361	-0.24916	-1.05515	SRSF4	serine and arginine rich splicing factor 4
213905_x_at	0.0126	0.00341	-2.96377	-2.45663	-1.05491	BGN	biglycan
231693_at	0.000196	2.08e-05	-4.36104	2.27604	-1.05479	FABP1	fatty acid binding protein 1
240466_at	6.27e-05	5.22e-06	-4.68387	3.5848	-1.05471
204762_s_at	1.64e-13	4.37e-16	-8.86709	25.9968	-1.05222	GNAO1	G protein subunit alpha o1
215321_at	0.0156	0.00444	-2.87811	-2.69409	-1.05061	RUNDC3B	RUN domain containing 3B
205633_s_at	0.00186	0.000323	-3.66024	-0.29457	-1.04929	ALAS1	5'-aminolevulinate synthase 1
1556919_at	0.00251	0.000465	-3.55939	-0.6326	-1.04722	LEPR	leptin receptor
1559336_at	0.0105	0.00273	-3.03494	-2.25452	-1.04691	LOC101928505	uncharacterized LOC101928505
214234_s_at	0.0225	0.00695	-2.72773	-3.09541	-1.04678	CYP3A5	cytochrome P450 family 3 subfamily A member 5
204388_s_at	0.000475	6.06e-05	-4.09847	1.26846	-1.0464	MAOA	monoamine oxidase A
238440_at	0.000372	4.52e-05	-4.17169	1.54418	-1.0456	CLYBL	citrate lyase beta like
224990_at	0.000122	1.16e-05	-4.49924	2.82703	-1.04556	SMIM14	small integral membrane protein 14
214440_at	3.62e-05	2.66e-06	-4.83502	4.22321	-1.04553	NAT1	N-acetyltransferase 1
228055_at	4.27e-06	2e-07	-5.38881	6.69526	-1.04467	NAPSB	napsin B aspartic peptidase, pseudogene
242814_at	0.00013	1.26e-05	-4.47943	2.7472	-1.04376	SERPINB9	serpin family B member 9
227020_at	2.06e-05	1.33e-06	-4.98745	4.88311	-1.0436	YPEL2	yippee like 2
219527_at	5.47e-05	4.4e-06	-4.72264	3.74705	-1.04357	MARC2	mitochondrial amidoxime reducing component 2
206743_s_at	0.000909	0.000134	-3.89512	0.52435	-1.04213	ASGR1	asialoglycoprotein receptor 1
205911_at	2.9e-19	1.86e-22	-11.0596	40.2789	-1.04123	PTH1R	parathyroid hormone 1 receptor
214971_s_at	0.0119	0.00319	-2.98576	-2.39464	-1.04008	ST6GAL1	ST6 beta-galactoside alpha-2,6-sialyltransferase 1
233112_at	0.00101	0.000153	-3.86067	0.40151	-1.03924
225922_at	0.000392	4.8e-05	-4.15662	1.48709	-1.0391	FNIP2	folliculin interacting protein 2
235567_at	0.00022	2.39e-05	-4.3271	2.14287	-1.03898	RORA	RAR related orphan receptor A
201110_s_at	0.066	0.0266	-2.23391	-4.27142	-1.03823	THBS1	thrombospondin 1
200731_s_at	4.9e-07	1.5e-08	-5.9061	9.18148	-1.03737	PTP4A1	protein tyrosine phosphatase type IVA, member 1
222071_s_at	0.0329	0.0111	-2.56372	-3.51032	-1.03715	SLCO4C1	solute carrier organic anion transporter family member 4C1
222853_at	0.0271	0.00872	-2.64918	-3.29711	-1.03644	FLRT3	fibronectin leucine rich transmembrane protein 3
210798_x_at	0.0314	0.0105	-2.58453	-3.45901	-1.03609	MASP2	mannan binding lectin serine peptidase 2
206293_at	0.0534	0.0204	-2.33849	-4.04077	-1.03569	SULT2A1	sulfotransferase family 2A member 1
243562_at	0.0378	0.0132	-2.49968	-3.66581	-1.03514	KNG1	kininogen 1
219274_at	0.00546	0.00121	-3.28371	-1.51396	-1.03405	TSPAN12	tetraspanin 12
219666_at	0.000974	0.000146	-3.87329	0.4464	-1.03395	MS4A6A	membrane spanning 4-domains A6A
213988_s_at	8.45e-06	4.5e-07	-5.21969	5.91878	-1.03342	SAT1	spermidine/spermine N1-acetyltransferase 1
228656_at	0.000462	5.86e-05	-4.10679	1.29957	-1.03302	PROX1	prospero homeobox 1
228890_at	2.13e-05	1.38e-06	-4.97998	4.8504	-1.03229	ATOH8	atonal bHLH transcription factor 8
216958_s_at	2.36e-06	9.8e-08	-5.53459	7.37927	-1.03217	IVD	isovaleryl-CoA dehydrogenase
230624_at	0.000588	7.87e-05	-4.03255	1.02372	-1.03188	SLC25A27	solute carrier family 25 member 27
213706_at	0.0104	0.0027	-3.0387	-2.24371	-1.03063	GPD1	glycerol-3-phosphate dehydrogenase 1
224336_s_at	0.000311	3.61e-05	-4.22689	1.75474	-1.03007	DUSP16	dual specificity phosphatase 16
1559363_at	0.0014	0.000226	-3.75684	0.03691	-1.02992	LINC01146	long intergenic non-protein coding RNA 1146
201432_at	1.42e-06	5.35e-08	-5.65627	7.96032	-1.02987	CAT	catalase
237026_at	0.000143	1.42e-05	-4.45223	2.63804	-1.02873
236725_at	0.00178	0.000306	-3.67524	-0.2436	-1.02845	WWC1	WW and C2 domain containing 1
201565_s_at	6.94e-06	3.57e-07	-5.26857	6.1413	-1.02787	ID2	inhibitor of DNA binding 2, HLH protein
209711_at	3.2e-06	1.41e-07	-5.46047	7.02981	-1.0278	SLC35D1	solute carrier family 35 member D1
211920_at	3.64e-08	6.87e-10	-6.48595	12.1537	-1.02751	CFB	complement factor B
203562_at	3.83e-05	2.86e-06	-4.81936	4.15633	-1.02649	FEZ1	fasciculation and elongation protein zeta 1
223582_at	0.00828	0.00202	-3.12897	-1.98079	-1.02647	ADGRV1	adhesion G protein-coupled receptor V1
226946_at	0.000888	0.00013	-3.90272	0.5516	-1.02633	NADK2	NAD kinase 2, mitochondrial
205500_at	0.00238	0.000437	-3.5768	-0.57483	-1.02625	C5	complement component 5
220626_at	0.00172	0.000294	-3.68625	-0.20606	-1.02481	SERPINA10	serpin family A member 10
236975_at	2.65e-06	1.13e-07	-5.50502	7.23941	-1.02368
1555832_s_at	4.23e-05	3.22e-06	-4.79283	4.0434	-1.02268	KLF6	Kruppel like factor 6
1556067_a_at	5.82e-09	8.05e-11	-6.87107	14.2264	-1.02228	KDM6B	lysine demethylase 6B
204997_at	0.00178	0.000304	-3.67659	-0.239	-1.02197	GPD1	glycerol-3-phosphate dehydrogenase 1
220112_at	4.73e-15	8.48e-18	-9.47228	29.8324	-1.02186	ANKRD55	ankyrin repeat domain 55
235680_at	9.44e-05	8.53e-06	-4.57085	3.11803	-1.02168
203408_s_at	0.00539	0.00119	-3.28815	-1.50025	-1.02138	SATB1	SATB homeobox 1
216546_s_at	8.15e-10	8.12e-12	-7.26971	16.4476	-1.02058	CHI3L1	chitinase 3 like 1
207392_x_at	0.0777	0.0326	-2.15169	-4.4457	-1.02051	UGT2B15	UDP glucuronosyltransferase family 2 member B15
206872_at	0.00433	0.000909	-3.36805	-1.25101	-1.02039	SLC17A1	solute carrier family 17 member 1
218653_at	0.000994	0.000149	-3.86684	0.42345	-1.02033	SLC25A15	solute carrier family 25 member 15
210056_at	0.000511	6.63e-05	-4.07585	1.1841	-1.02032	RND1	Rho family GTPase 1
244407_at	0.000163	1.66e-05	-4.41438	2.48704	-1.02022	CYP39A1	cytochrome P450 family 39 subfamily A member 1
1558815_at	0.00111	0.000171	-3.83078	0.29566	-1.01956	SORBS2	sorbin and SH3 domain containing 2
242370_at	8.23e-10	8.21e-12	-7.26787	16.4372	-1.01925	MTHFD2L	methylenetetrahydrofolate dehydrogenase (NADP+ dependent) 2-like
205328_at	0.000803	0.000115	-3.93439	0.66553	-1.01835	CLDN10	claudin 10
242947_at	0.000249	2.77e-05	-4.29138	2.00368	-1.01832
219230_at	0.025	0.00788	-2.68424	-3.20777	-1.01815	TMEM100	transmembrane protein 100
222830_at	0.00146	0.000238	-3.74314	-0.01057	-1.01772	GRHL1	grainyhead like transcription factor 1
206350_at	0.0401	0.0142	-2.47286	-3.72981	-1.01762	APCS	amyloid P component, serum
209396_s_at	0.286	0.173	-1.36749	-5.79008	-1.017	CHI3L1	chitinase 3 like 1
232325_at	0.0693	0.0283	-2.20958	-4.32363	-1.01673
1569003_at	0.00804	0.00194	-3.14055	-1.94656	-1.01538	VMP1	vacuole membrane protein 1
205421_at	0.0212	0.00646	-2.75285	-3.02974	-1.01521	SLC22A3	solute carrier family 22 member 3
203058_s_at	0.000353	4.23e-05	-4.18794	1.60594	-1.01429	PAPSS2	3'-phosphoadenosine 5'-phosphosulfate synthase 2
224801_at	3.18e-06	1.39e-07	-5.46281	7.04077	-1.01283	NDFIP2	Nedd4 family interacting protein 2
220736_at	0.00177	0.000302	-3.67866	-0.23194	-1.01263	SLC19A3	solute carrier family 19 member 3
203973_s_at	8.01e-06	4.23e-07	-5.23299	5.97915	-1.01248	CEBPD	CCAAT/enhancer binding protein delta
238752_at	0.11	0.0507	-1.96557	-4.81712	-1.01217	GPLD1	glycosylphosphatidylinositol specific phospholipase D1
205790_at	0.00238	0.000437	-3.57695	-0.57433	-1.01171	SKAP1	src kinase associated phosphoprotein 1
1568920_at	0.00344	0.000687	-3.44911	-0.99272	-1.01159
212196_at	2.12e-05	1.37e-06	-4.98088	4.85433	-1.01132	IL6ST	interleukin 6 signal transducer
208708_x_at	1.06e-05	5.92e-07	-5.16172	5.65689	-1.01048	EIF5	eukaryotic translation initiation factor 5
205259_at	0.000473	6.03e-05	-4.09957	1.27256	-1.01014	NR3C2	nuclear receptor subfamily 3 group C member 2
236901_at	2.29e-08	3.92e-10	-6.58798	12.6954	-1.01012
204551_s_at	0.053	0.0202	-2.34235	-4.03206	-1.00975	AHSG	alpha 2-HS glycoprotein
211965_at	0.000201	2.14e-05	-4.35383	2.2477	-1.00907	ZFP36L1	ZFP36 ring finger protein like 1
211557_x_at	9.52e-05	8.63e-06	-4.5682	3.10722	-1.00903	SLCO2B1	solute carrier organic anion transporter family member 2B1
227671_at	0.357	0.231	-1.20021	-6.001	-1.0088	XIST	X inactive specific transcript (non-protein coding)
222939_s_at	0.00972	0.00247	-3.06682	-2.16256	-1.00728	SLC16A10	solute carrier family 16 member 10
201540_at	0.0038	0.000776	-3.41399	-1.10528	-1.00493	FHL1	four and a half LIM domains 1
227828_s_at	0.00221	0.000398	-3.60279	-0.48815	-1.00309	EVA1A	eva-1 homolog A, regulator of programmed cell death
218869_at	3.87e-06	1.77e-07	-5.41343	6.80981	-1.00229	MLYCD	malonyl-CoA decarboxylase
227038_at	0.00137	0.000221	-3.7634	0.05967	-1.00149	SGMS2	sphingomyelin synthase 2
235155_at	7.31e-06	3.8e-07	-5.25556	6.08188	-1.00138	BDH2	3-hydroxybutyrate dehydrogenase, type 2
204864_s_at	0.00222	0.000402	-3.5999	-0.4978	-1.0006	IL6ST	interleukin 6 signal transducer
227407_at	2.34e-05	1.55e-06	-4.95481	4.7405	-1.00039	TAPT1	transmembrane anterior posterior transformation 1
1562669_at	1.39e-09	1.53e-11	-7.16076	15.8333	-0.999412
203543_s_at	0.0039	0.000799	-3.40563	-1.13194	-0.998286	KLF9	Kruppel like factor 9
210944_s_at	0.000612	8.28e-05	-4.01954	0.97582	-0.998118	CAPN3	calpain 3
210215_at	0.0047	0.00101	-3.33871	-1.34315	-0.99707	TFR2	transferrin receptor 2
235570_at	0.000873	0.000128	-3.90824	0.57139	-0.996725	RBMS3	RNA binding motif single stranded interacting protein 3
232925_at	0.00165	0.000277	-3.70177	-0.153	-0.996082
222294_s_at	0.000625	8.49e-05	-4.01325	0.9527	-0.994685	RAB27A	RAB27A, member RAS oncogene family
209735_at	0.0307	0.0102	-2.5945	-3.43429	-0.992147	ABCG2	ATP binding cassette subfamily G member 2 (Junior blood group)
230550_at	0.00165	0.000277	-3.70184	-0.15275	-0.992084	MS4A6A	membrane spanning 4-domains A6A
216687_x_at	0.0967	0.043	-2.03683	-4.67871	-0.991987	UGT2B15	UDP glucuronosyltransferase family 2 member B15
242059_at	0.00307	0.000599	-3.48831	-0.86587	-0.991789
226625_at	0.00103	0.000157	-3.85391	0.37751	-0.991781	TGFBR3	transforming growth factor beta receptor 3
201983_s_at	0.00112	0.000173	-3.82824	0.28671	-0.991618	EGFR	epidermal growth factor receptor
221268_s_at	0.00287	0.00055	-3.51248	-0.78701	-0.991531	SGPP1	sphingosine-1-phosphate phosphatase 1
212423_at	1.29e-05	7.58e-07	-5.10906	5.42095	-0.990739	ZCCHC24	zinc finger CCHC-type containing 24
232500_at	0.00221	0.0004	-3.60155	-0.49228	-0.990362	RALGAPA2	Ral GTPase activating protein catalytic alpha subunit 2
202847_at	0.00331	0.000656	-3.46224	-0.95038	-0.990187	PCK2	phosphoenolpyruvate carboxykinase 2, mitochondrial
217013_at	4.11e-06	1.91e-07	-5.39832	6.73947	-0.990123	AZGP1P1	alpha-2-glycoprotein 1, zinc-binding pseudogene 1
230912_at	1.27e-08	1.99e-10	-6.70979	13.3493	-0.990093	ASPDH	aspartate dehydrogenase domain containing
1558009_at	0.00701	0.00164	-3.19172	-1.79393	-0.989951	SLC1A2	solute carrier family 1 member 2
224822_at	3.42e-05	2.48e-06	-4.8512	4.29252	-0.989946	DLC1	DLC1 Rho GTPase activating protein
201984_s_at	2.24e-06	9.2e-08	-5.54739	7.43994	-0.988874	EGFR	epidermal growth factor receptor
221766_s_at	0.000338	4.02e-05	-4.20075	1.65474	-0.988799	FAM46A	family with sequence similarity 46 member A
202441_at	2.79e-08	4.99e-10	-6.54419	12.4622	-0.988594	ERLIN1	ER lipid raft associated 1
215785_s_at	0.0101	0.00259	-3.05131	-2.2074	-0.988502	CYFIP2	cytoplasmic FMR1 interacting protein 2
213397_x_at	0.000568	7.55e-05	-4.04308	1.0626	-0.988466	RNASE4	ribonuclease A family member 4
204836_at	0.0104	0.00267	-3.04175	-2.23495	-0.987993	GLDC	glycine decarboxylase
210148_at	0.00103	0.000156	-3.85556	0.38336	-0.987882	HIPK3	homeodomain interacting protein kinase 3
228575_at	6.55e-06	3.34e-07	-5.28249	6.20493	-0.987863	IL20RB	interleukin 20 receptor subunit beta
223394_at	1.43e-08	2.3e-10	-6.68412	13.2108	-0.987113	SERTAD1	SERTA domain containing 1
211028_s_at	0.00188	0.000327	-3.65717	-0.30499	-0.986986	KHK	ketohexokinase
213661_at	1.25e-11	6.59e-14	-8.07093	21.1197	-0.986977	PAMR1	peptidase domain containing associated with muscle regeneration 1
203279_at	4.13e-10	3.65e-12	-7.406	17.2236	-0.986952	EDEM1	ER degradation enhancing alpha-mannosidase like protein 1
203837_at	0.00705	0.00165	-3.18984	-1.79957	-0.9869	MAP3K5	mitogen-activated protein kinase kinase kinase 5
238987_at	0.000227	2.48e-05	-4.3188	2.11044	-0.98592	B4GALT1	beta-1,4-galactosyltransferase 1
210663_s_at	0.0038	0.000775	-3.41445	-1.10382	-0.984694	KYNU	kynureninase
206955_at	2.11e-10	1.73e-12	-7.53211	17.9487	-0.982618	LOC101930168///LOC100509620///AQP7	putative aquaporin-7-like protein 3///putative aquaporin-7-like protein 3///aquaporin 7
217649_at	0.00211	0.000378	-3.61734	-0.43938	-0.982167	ZFAND5	zinc finger AN1-type containing 5
204512_at	5.4e-08	1.11e-09	-6.39873	11.6948	-0.981761	HIVEP1	human immunodeficiency virus type I enhancer binding protein 1
222784_at	2.72e-06	1.17e-07	-5.49915	7.21175	-0.981741	SMOC1	SPARC related modular calcium binding 1
225930_at	5.58e-07	1.76e-08	-5.87566	9.03069	-0.980003	NKIRAS1	NFKB inhibitor interacting Ras like 1
228528_at	2.11e-07	5.64e-09	-6.09392	10.1237	-0.979925	MIR29C///MIR29B2	microRNA 29c///microRNA 29b-2
219796_s_at	0.00872	0.00216	-3.1084	-2.0413	-0.979522	CDHR5	cadherin related family member 5
206130_s_at	0.000366	4.44e-05	-4.1763	1.56167	-0.979451	ASGR2	asialoglycoprotein receptor 2
244742_at	0.00383	0.000782	-3.41187	-1.11207	-0.979134	LOC101929036///PAH	uncharacterized LOC101929036///phenylalanine hydroxylase
201466_s_at	0.000412	5.09e-05	-4.14213	1.43235	-0.978563	JUN	Jun proto-oncogene, AP-1 transcription factor subunit
202960_s_at	7.2e-06	3.72e-07	-5.2596	6.10032	-0.978557	MUT	methylmalonyl-CoA mutase
200710_at	2.33e-06	9.61e-08	-5.53843	7.39745	-0.978417	ACADVL	acyl-CoA dehydrogenase, very long chain
224588_at	0.413	0.282	-1.07896	-6.13695	-0.978146	XIST	X inactive specific transcript (non-protein coding)
1560137_at	1.31e-13	3.28e-16	-8.91142	26.2743	-0.977456
1555753_x_at	7.88e-09	1.15e-10	-6.80758	13.8796	-0.97725	ERVH-6	endogenous retrovirus group H member 6
219737_s_at	0.00151	0.000249	-3.73148	-0.05086	-0.976407	PCDH9	protocadherin 9
213515_x_at	2.32e-05	1.54e-06	-4.95607	4.74599	-0.976063	HBG2///HBG1	hemoglobin subunit gamma 2///hemoglobin subunit gamma 1
226811_at	0.0103	0.00266	-3.04314	-2.23093	-0.975411	FAM46C	family with sequence similarity 46 member C
217388_s_at	0.00863	0.00213	-3.11226	-2.03	-0.975178	KYNU	kynureninase
221584_s_at	0.000203	2.17e-05	-4.35124	2.23752	-0.974772	KCNMA1	potassium calcium-activated channel subfamily M alpha 1
202067_s_at	0.000245	2.72e-05	-4.2966	2.02396	-0.974365	LDLR	low density lipoprotein receptor
221636_s_at	1.54e-05	9.37e-07	-5.06365	5.21894	-0.973823	MARC2	mitochondrial amidoxime reducing component 2
214326_x_at	0.000203	2.17e-05	-4.35096	2.23641	-0.973817	JUND	JunD proto-oncogene, AP-1 transcription factor subunit
207421_at	0.00213	0.000381	-3.61493	-0.44747	-0.973199	CA5A	carbonic anhydrase 5A
212225_at	3.49e-08	6.49e-10	-6.49635	12.2086	-0.972983	EIF1	eukaryotic translation initiation factor 1
87100_at	0.00378	0.00077	-3.41615	-1.0984	-0.972923	ABHD2	abhydrolase domain containing 2
226038_at	6.82e-05	5.79e-06	-4.66008	3.48582	-0.972144	LONRF1	LON peptidase N-terminal domain and ring finger 1
220446_s_at	5.67e-05	4.6e-06	-4.71254	3.70467	-0.971978	CHST4	carbohydrate sulfotransferase 4
221008_s_at	0.093	0.0409	-2.0584	-4.63589	-0.971396	ETNPPL	ethanolamine-phosphate phospho-lyase
212364_at	3.12e-05	2.21e-06	-4.87652	4.40131	-0.971218	MYO1B	myosin IB
236094_at	0.000191	2.01e-05	-4.36891	2.30703	-0.970966	TCF7L2	transcription factor 7 like 2
209645_s_at	0.0029	0.000556	-3.50902	-0.79831	-0.970889	ALDH1B1	aldehyde dehydrogenase 1 family member B1
213135_at	0.00701	0.00164	-3.19178	-1.79374	-0.970635	TIAM1	T-cell lymphoma invasion and metastasis 1
236545_at	0.00149	0.000246	-3.7345	-0.04042	-0.970276
207378_at	7.81e-05	6.81e-06	-4.62292	3.33195	-0.969632	TREH	trehalase
225311_at	7.1e-06	3.66e-07	-5.26308	6.1162	-0.969611	IVD	isovaleryl-CoA dehydrogenase
225107_at	0.00127	0.000202	-3.78743	0.14341	-0.969525	HNRNPA2B1	heterogeneous nuclear ribonucleoprotein A2/B1
214375_at	0.000386	4.72e-05	-4.16119	1.50439	-0.969251	PPFIBP1	PPFIA binding protein 1
205774_at	0.0269	0.00863	-2.65258	-3.2885	-0.968948	F12	coagulation factor XII
242025_at	0.000544	7.18e-05	-4.05583	1.10976	-0.968862
205119_s_at	0.000149	1.49e-05	-4.44017	2.58982	-0.968565	FPR1	formyl peptide receptor 1
208249_s_at	6.44e-06	3.27e-07	-5.28694	6.22531	-0.968311	TGDS	TDP-glucose 4,6-dehydratase
1552440_at	9.14e-11	6.51e-13	-7.69496	18.895	-0.967994	GPR182	G protein-coupled receptor 182
203060_s_at	0.000832	0.00012	-3.92339	0.62587	-0.967695	PAPSS2	3'-phosphoadenosine 5'-phosphosulfate synthase 2
236261_at	8.19e-07	2.8e-08	-5.78456	8.58276	-0.967473	OSBPL6	oxysterol binding protein like 6
200708_at	9.74e-06	5.33e-07	-5.18407	5.75761	-0.96745	GOT2	glutamic-oxaloacetic transaminase 2
203751_x_at	0.000221	2.41e-05	-4.32544	2.13641	-0.967409	JUND	JunD proto-oncogene, AP-1 transcription factor subunit
224606_at	4.19e-05	3.18e-06	-4.79548	4.05466	-0.9673	KLF6	Kruppel like factor 6
209123_at	6.33e-05	5.28e-06	-4.68116	3.57351	-0.966411	QDPR	quinoid dihydropteridine reductase
229641_at	7.86e-07	2.66e-08	-5.79432	8.6305	-0.965751	CCBE1	collagen and calcium binding EGF domains 1
228540_at	7.59e-08	1.66e-09	-6.32314	11.3005	-0.965611	QKI	QKI, KH domain containing RNA binding
240435_at	6.77e-06	3.47e-07	-5.27432	6.16757	-0.965435	LOC101928635	uncharacterized LOC101928635
1555801_s_at	0.0648	0.026	-2.24261	-4.25262	-0.965073	ZNF385B	zinc finger protein 385B
205565_s_at	7.01e-07	2.33e-08	-5.82064	8.75958	-0.964097	FXN	frataxin
202459_s_at	0.000295	3.4e-05	-4.24191	1.81246	-0.962447	LPIN2	lipin 2
236220_at	0.0054	0.0012	-3.28703	-1.50372	-0.962066	SLC16A10	solute carrier family 16 member 10
211026_s_at	0.0175	0.0051	-2.83203	-2.81916	-0.961721	MGLL	monoglyceride lipase
224657_at	0.000879	0.000129	-3.90619	0.56402	-0.961701	ERRFI1	ERBB receptor feedback inhibitor 1
224339_s_at	0.000349	4.17e-05	-4.19155	1.61967	-0.961689	ANGPTL1	angiopoietin like 1
227062_at	0.118	0.0553	-1.92821	-4.88779	-0.961626	MIR612///NEAT1	microRNA 612///nuclear paraspeckle assembly transcript 1 (non-protein coding)
230250_at	0.00298	0.000575	-3.49959	-0.8291	-0.961405	PTPRB	protein tyrosine phosphatase, receptor type B
209656_s_at	0.0428	0.0154	-2.44282	-3.80075	-0.961345	TMEM47	transmembrane protein 47
231179_at	0.0467	0.0172	-2.4024	-3.89491	-0.961106	IP6K3	inositol hexakisphosphate kinase 3
219157_at	1.05e-05	5.86e-07	-5.16397	5.66703	-0.961039	KLHL2	kelch like family member 2
1552519_at	0.000492	6.32e-05	-4.08776	1.22845	-0.960732	ACVR1C	activin A receptor type 1C
219188_s_at	0.000333	3.95e-05	-4.20528	1.67205	-0.960595	MACROD1	MACRO domain containing 1
230609_at	3.35e-05	2.41e-06	-4.85747	4.3194	-0.959511	CLINT1	clathrin interactor 1
241703_at	0.0337	0.0115	-2.55187	-3.53936	-0.959492	RUNDC3B	RUN domain containing 3B
205765_at	0.0782	0.0329	-2.1485	-4.45233	-0.958592	CYP3A5	cytochrome P450 family 3 subfamily A member 5
205826_at	4.52e-15	8.03e-18	-9.48061	29.8858	-0.957352	MYOM2	myomesin 2
201563_at	0.00322	0.000633	-3.47225	-0.91797	-0.956317	SORD	sorbitol dehydrogenase
232180_at	0.0041	0.000853	-3.38662	-1.19233	-0.955717	UGP2	UDP-glucose pyrophosphorylase 2
235129_at	0.0115	0.00302	-3.00225	-2.34788	-0.955012	PPP1R1A	protein phosphatase 1 regulatory inhibitor subunit 1A
229309_at	0.00258	0.000482	-3.5492	-0.6663	-0.954971	ADRB1	adrenoceptor beta 1
207543_s_at	0.0114	0.003	-3.00535	-2.33909	-0.954719	P4HA1	prolyl 4-hydroxylase subunit alpha 1
226553_at	5.03e-05	3.98e-06	-4.74515	3.84171	-0.954496	TMPRSS2	transmembrane protease, serine 2
237049_at	0.0072	0.0017	-3.18208	-1.82283	-0.952233
234941_s_at	1.94e-07	5.09e-09	-6.11349	10.223	-0.95222	GPHN	gephyrin
211491_at	8.74e-09	1.3e-10	-6.78655	13.7651	-0.951873	ADRA1A	adrenoceptor alpha 1A
45288_at	0.000185	1.93e-05	-4.37823	2.3438	-0.951405	ABHD6	abhydrolase domain containing 6
201261_x_at	0.0132	0.00361	-2.94581	-2.50694	-0.951039	BGN	biglycan
206893_at	0.00516	0.00113	-3.30433	-1.45022	-0.951016	SALL1	spalt like transcription factor 1
244627_at	0.00241	0.000444	-3.57239	-0.5895	-0.95059	TKFC	triokinase and FMN cyclase
223268_at	0.000176	1.82e-05	-4.39322	2.4031	-0.950561	C11orf54	chromosome 11 open reading frame 54
214890_s_at	0.00188	0.000326	-3.65782	-0.30278	-0.949844	FAM149A	family with sequence similarity 149 member A
225337_at	8.2e-06	4.34e-07	-5.22742	5.95385	-0.949817	ABHD2	abhydrolase domain containing 2
232423_at	0.000442	5.55e-05	-4.12061	1.35137	-0.949537	ARSD	arylsulfatase D
235739_at	1.52e-05	9.21e-07	-5.06741	5.23564	-0.949233
236907_at	0.00516	0.00113	-3.30445	-1.44986	-0.94809
205749_at	0.176	0.0923	-1.69163	-5.30489	-0.947417	CYP1A1	cytochrome P450 family 1 subfamily A member 1
208470_s_at	0.0247	0.00778	-2.6889	-3.19581	-0.947234	HPR///HP	haptoglobin-related protein///haptoglobin
233303_at	8.2e-07	2.8e-08	-5.78409	8.58046	-0.947233
1556066_at	8.34e-11	5.77e-13	-7.71498	19.0121	-0.946578	KDM6B	lysine demethylase 6B
224973_at	0.00129	0.000204	-3.78384	0.13088	-0.946385	FAM46A	family with sequence similarity 46 member A
205858_at	2.58e-06	1.1e-07	-5.5118	7.27145	-0.945395	NGFR	nerve growth factor receptor
228915_at	5.94e-08	1.24e-09	-6.37814	11.5871	-0.944686	DACH1	dachshund family transcription factor 1
216908_x_at	1.07e-08	1.63e-10	-6.74589	13.5445	-0.944669	RRN3P1	RRN3 homolog, RNA polymerase I transcription factor pseudogene 1
235747_at	0.000132	1.29e-05	-4.47496	2.72922	-0.944191	LINC00849///SLC25A16	long intergenic non-protein coding RNA 849///solute carrier family 25 member 16
205016_at	0.00426	0.000892	-3.37369	-1.23321	-0.943161	TGFA	transforming growth factor alpha
204450_x_at	0.0463	0.017	-2.40652	-3.88538	-0.942108	APOA1	apolipoprotein A1
215794_x_at	0.0122	0.00326	-2.97827	-2.41581	-0.942091	GLUD2	glutamate dehydrogenase 2
202369_s_at	7.9e-07	2.68e-08	-5.79317	8.62485	-0.941957	TRAM2	translocation associated membrane protein 2
241986_at	4.08e-21	2.02e-24	-11.7118	44.6838	-0.941572	BMPER	BMP binding endothelial regulator
201109_s_at	0.073	0.0301	-2.18443	-4.37704	-0.940437	THBS1	thrombospondin 1
242931_at	0.0004	4.91e-05	-4.15091	1.46552	-0.940403
239269_at	0.00341	0.000678	-3.45267	-0.98126	-0.940165	MIR612///NEAT1	microRNA 612///nuclear paraspeckle assembly transcript 1 (non-protein coding)
211657_at	5.88e-07	1.89e-08	-5.8614	8.96028	-0.939739	CEACAM6	carcinoembryonic antigen related cell adhesion molecule 6
206618_at	1.12e-05	6.37e-07	-5.14615	5.58695	-0.939392	IL18R1	interleukin 18 receptor 1
239345_at	0.000973	0.000145	-3.87387	0.44845	-0.939001	SLC19A3	solute carrier family 19 member 3
219185_at	3.15e-06	1.38e-07	-5.46469	7.04962	-0.938283	SIRT5	sirtuin 5
242733_at	0.000702	9.77e-05	-3.97706	0.82033	-0.93813
202862_at	0.000354	4.25e-05	-4.18678	1.60152	-0.938129	FAH	fumarylacetoacetate hydrolase
217512_at	0.0348	0.0119	-2.53835	-3.57235	-0.936445	KNG1	kininogen 1
205155_s_at	4.7e-07	1.43e-08	-5.91559	9.2286	-0.935728	SPTBN2	spectrin beta, non-erythrocytic 2
207203_s_at	1.34e-08	2.14e-10	-6.69702	13.2804	-0.935611	NR1I2	nuclear receptor subfamily 1 group I member 2
201130_s_at	0.00819	0.00199	-3.13322	-1.96823	-0.935524	CDH1	cadherin 1
1554708_s_at	3.08e-09	3.9e-11	-6.99845	14.9281	-0.935262	SPATA6L	spermatogenesis associated 6 like
221679_s_at	0.00594	0.00134	-3.25307	-1.60798	-0.934689	ABHD6	abhydrolase domain containing 6
200675_at	0.00133	0.000214	-3.77215	0.09013	-0.933852	CD81	CD81 molecule
222816_s_at	0.000283	3.23e-05	-4.25442	1.86063	-0.932424	ZCCHC2	zinc finger CCHC-type containing 2
217073_x_at	0.0521	0.0198	-2.3495	-4.01591	-0.931872	APOA1	apolipoprotein A1
244126_at	8.92e-10	9.06e-12	-7.25094	16.3414	-0.931845	PEX11G	peroxisomal biogenesis factor 11 gamma
204476_s_at	0.00122	0.000191	-3.80175	0.19354	-0.931561	PC	pyruvate carboxylase
205754_at	0.00342	0.000681	-3.45156	-0.98481	-0.93154	F2	coagulation factor II, thrombin
220975_s_at	2.42e-06	1.01e-07	-5.52889	7.35225	-0.930874	C1QTNF1	C1q and tumor necrosis factor related protein 1
239512_at	1.04e-06	3.74e-08	-5.72747	8.30454	-0.930658	SRSF4	serine and arginine rich splicing factor 4
209967_s_at	1.3e-06	4.82e-08	-5.67691	8.05978	-0.929961	CREM	cAMP responsive element modulator
202718_at	0.11	0.0505	-1.96768	-4.8131	-0.929695	IGFBP2	insulin like growth factor binding protein 2
203059_s_at	1.1e-05	6.21e-07	-5.15165	5.61163	-0.929001	PAPSS2	3'-phosphoadenosine 5'-phosphosulfate synthase 2
204271_s_at	0.000409	5.04e-05	-4.14448	1.44124	-0.928588	EDNRB	endothelin receptor type B
233935_at	0.0135	0.0037	-2.93712	-2.53118	-0.928062	TNFSF14	tumor necrosis factor superfamily member 14
230520_at	1.4e-07	3.43e-09	-6.1878	10.6021	-0.92792	AIG1	androgen induced 1
229851_s_at	6.09e-05	5.03e-06	-4.69205	3.61897	-0.927915	C11orf54	chromosome 11 open reading frame 54
228807_at	8.62e-11	6.02e-13	-7.70796	18.971	-0.927893	ASPA	aspartoacylase
210299_s_at	0.00436	0.000918	-3.36545	-1.25919	-0.927447	FHL1	four and a half LIM domains 1
1552790_a_at	1.52e-05	9.23e-07	-5.06682	5.23298	-0.92731	SEC62	SEC62 homolog, preprotein translocation factor
202391_at	0.0127	0.00345	-2.95999	-2.46724	-0.927241	BASP1	brain abundant membrane attached signal protein 1
1556601_a_at	0.00195	0.000343	-3.64359	-0.35096	-0.926301	SPATA13	spermatogenesis associated 13
213560_at	4.25e-08	8.16e-10	-6.45451	11.9878	-0.926066	GADD45B	growth arrest and DNA damage inducible beta
204119_s_at	2.75e-05	1.9e-06	-4.90994	4.54557	-0.925849	ADK	adenosine kinase
1559618_at	4.23e-06	1.98e-07	-5.39099	6.70539	-0.925526	LOC100129447	uncharacterized LOC100129447
204646_at	0.0142	0.00395	-2.91621	-2.58924	-0.92546	DPYD	dihydropyrimidine dehydrogenase
226847_at	0.0896	0.039	-2.0779	-4.59679	-0.924665	FST	follistatin
1560112_at	1.62e-10	1.29e-12	-7.58108	18.2321	-0.924211	WDFY2	WD repeat and FYVE domain containing 2
203293_s_at	0.00279	0.00053	-3.52288	-0.75293	-0.923946	LMAN1	lectin, mannose binding 1
209692_at	1.13e-07	2.67e-09	-6.23463	10.8426	-0.923909	EYA2	EYA transcriptional coactivator and phosphatase 2
207630_s_at	0.000106	9.84e-06	-4.53786	2.98351	-0.923417	CREM	cAMP responsive element modulator
218087_s_at	0.00067	9.25e-05	-3.99127	0.87219	-0.923268	SORBS1	sorbin and SH3 domain containing 1
235438_at	0.0274	0.00885	-2.64399	-3.31025	-0.923256	CYP7B1	cytochrome P450 family 7 subfamily B member 1
235879_at	0.0264	0.00845	-2.66032	-3.26884	-0.922788
206548_at	0.0255	0.00809	-2.67538	-3.23044	-0.922229
201508_at	0.00127	0.0002	-3.78914	0.1494	-0.922037	IGFBP4	insulin like growth factor binding protein 4
226778_at	0.000961	0.000143	-3.87789	0.4628	-0.92192	TDRP	testis development related protein
1558613_at	0.00168	0.000285	-3.69459	-0.17755	-0.921677
204787_at	0.00598	0.00135	-3.2505	-1.61585	-0.92154	VSIG4	V-set and immunoglobulin domain containing 4
231270_at	0.00524	0.00115	-3.29894	-1.4669	-0.921525	LOC100507258///CA13	uncharacterized LOC100507258///carbonic anhydrase 13
242403_at	0.00318	0.000625	-3.47608	-0.90556	-0.921146
216804_s_at	2.61e-05	1.78e-06	-4.92364	4.60495	-0.920907	PDLIM5	PDZ and LIM domain 5
214077_x_at	2.5e-05	1.69e-06	-4.93537	4.65588	-0.920406	MEIS3P1	Meis homeobox 3 pseudogene 1
216598_s_at	0.0371	0.0129	-2.50881	-3.64385	-0.919902	CCL2	C-C motif chemokine ligand 2
1560525_at	0.0289	0.00946	-2.62054	-3.36929	-0.917728
1563874_at	3.22e-06	1.42e-07	-5.45886	7.02224	-0.91771	WDR72	WD repeat domain 72
202376_at	0.0155	0.0044	-2.88069	-2.68702	-0.917303	SERPINA3	serpin family A member 3
214835_s_at	0.000444	5.58e-05	-4.11906	1.34558	-0.917283	SUCLG2	succinate-CoA ligase GDP-forming beta subunit
204848_x_at	7.35e-07	2.45e-08	-5.81019	8.70825	-0.917144	HBG2///HBG1	hemoglobin subunit gamma 2///hemoglobin subunit gamma 1
1561094_a_at	0.0178	0.00521	-2.82534	-2.83717	-0.916457	SLC22A25	solute carrier family 22 member 25
204763_s_at	2.92e-10	2.47e-12	-7.47202	17.6023	-0.916414	GNAO1	G protein subunit alpha o1
243046_at	0.000238	2.63e-05	-4.30468	2.05539	-0.914607
220032_at	0.000652	8.93e-05	-4.00011	0.90453	-0.913484	CPED1	cadherin like and PC-esterase domain containing 1
234008_s_at	3.53e-07	1.03e-08	-5.97937	9.5466	-0.913407	CES3	carboxylesterase 3
1568190_at	4.06e-11	2.56e-13	-7.84927	19.8015	-0.912984
219820_at	0.000637	8.69e-05	-4.0071	0.93013	-0.912495	SLC6A16	solute carrier family 6 member 16
225728_at	0.00791	0.00191	-3.14631	-1.92947	-0.911735	SORBS2	sorbin and SH3 domain containing 2
213306_at	0.00945	0.00238	-3.07781	-2.13064	-0.911412	MPDZ	multiple PDZ domain crumbs cell polarity complex component
226773_at	0.000669	9.23e-05	-3.99172	0.87381	-0.911408	PPM1K	protein phosphatase, Mg2+/Mn2+ dependent 1K
205304_s_at	0.0173	0.00503	-2.83711	-2.80546	-0.911227	KCNJ8	potassium voltage-gated channel subfamily J member 8
231578_at	2.99e-05	2.1e-06	-4.88732	4.44786	-0.910094	GBP1	guanylate binding protein 1
1552482_at	0.0247	0.0078	-2.68808	-3.1979	-0.909898	RAPH1	Ras association (RalGDS/AF-6) and pleckstrin homology domains 1
225661_at	5.91e-08	1.23e-09	-6.37945	11.5939	-0.909333	IFNAR1	interferon alpha and beta receptor subunit 1
236240_at	1.07e-11	5.51e-14	-8.09998	21.2939	-0.909018	ABHD18	abhydrolase domain containing 18
213973_at	8.82e-07	3.06e-08	-5.76694	8.49668	-0.908536	RRBP1	ribosome binding protein 1
41386_i_at	1.48e-08	2.39e-10	-6.67753	13.1754	-0.908524	KDM6B	lysine demethylase 6B
202217_at	7.93e-08	1.75e-09	-6.31357	11.2507	-0.908188	C21orf33	chromosome 21 open reading frame 33
207819_s_at	0.0775	0.0325	-2.15368	-4.44154	-0.907805	ABCB4	ATP binding cassette subfamily B member 4
207837_at	2.25e-11	1.27e-13	-7.96386	20.4806	-0.907146	RBPMS	RNA binding protein with multiple splicing
205654_at	0.0182	0.00538	-2.81433	-2.86672	-0.906656	C4BPA	complement component 4 binding protein alpha
203615_x_at	0.00434	0.000914	-3.36653	-1.2558	-0.906453	SULT1A1	sulfotransferase family 1A member 1
242478_at	0.000144	1.44e-05	-4.44885	2.62451	-0.905906
210738_s_at	0.00635	0.00146	-3.22858	-1.68258	-0.905894	SLC4A4	solute carrier family 4 member 4
225804_at	2.89e-05	2.02e-06	-4.89638	4.48695	-0.905681	CYB5D2	cytochrome b5 domain containing 2
214545_s_at	0.00149	0.000245	-3.73535	-0.03748	-0.90508	PROSC	proline synthetase cotranscribed homolog (bacterial)
225186_at	0.000178	1.84e-05	-4.39069	2.39309	-0.904694	RAPH1	Ras association (RalGDS/AF-6) and pleckstrin homology domains 1
206343_s_at	0.0357	0.0123	-2.52708	-3.59973	-0.904457	NRG1	neuregulin 1
202772_at	1.37e-05	8.13e-07	-5.09414	5.35443	-0.903194	HMGCL	3-hydroxymethyl-3-methylglutaryl-CoA lyase
203711_s_at	2.46e-05	1.66e-06	-4.93982	4.67524	-0.902358	HIBCH	3-hydroxyisobutyryl-CoA hydrolase
204863_s_at	0.00263	0.000493	-3.54323	-0.68599	-0.902337	IL6ST	interleukin 6 signal transducer
237398_at	2.78e-06	1.19e-07	-5.49441	7.18937	-0.902008
206450_at	1.74e-13	4.73e-16	-8.8547	25.9194	-0.901836	DBH	dopamine beta-hydroxylase
201968_s_at	3.04e-05	2.15e-06	-4.88265	4.42773	-0.901736	PGM1	phosphoglucomutase 1
206410_at	0.00636	0.00146	-3.22801	-1.68432	-0.901187	NR0B2	nuclear receptor subfamily 0 group B member 2
230076_at	2.58e-11	1.51e-13	-7.93541	20.3116	-0.901133	PITPNM3	PITPNM family member 3
228219_s_at	0.0022	0.000395	-3.60458	-0.48217	-0.89941	UPB1	beta-ureidopropionase 1
210517_s_at	0.0623	0.0248	-2.26239	-4.20959	-0.899274	AKAP12	A-kinase anchoring protein 12
209385_s_at	1.39e-05	8.26e-07	-5.09064	5.33884	-0.898733	PROSC	proline synthetase cotranscribed homolog (bacterial)
211652_s_at	0.0616	0.0244	-2.26815	-4.19699	-0.898637	LBP	lipopolysaccharide binding protein
206709_x_at	4.17e-06	1.94e-07	-5.39501	6.72406	-0.898571	GPT	glutamic--pyruvic transaminase
230397_at	3.59e-05	2.64e-06	-4.8375	4.23385	-0.89772	SAR1B	secretion associated Ras related GTPase 1B
200946_x_at	0.00599	0.00136	-3.24978	-1.61806	-0.897022	GLUD1	glutamate dehydrogenase 1
236472_at	0.00209	0.000372	-3.62167	-0.42482	-0.896809
236347_at	0.000104	9.66e-06	-4.5422	3.00118	-0.896159	MMAA	methylmalonic aciduria (cobalamin deficiency) cblA type
205582_s_at	3.39e-05	2.45e-06	-4.85365	4.30302	-0.895947	GGT5	gamma-glutamyltransferase 5
211038_s_at	6.17e-05	5.11e-06	-4.6886	3.60454	-0.895587	CROCCP2	ciliary rootlet coiled-coil, rootletin pseudogene 2
201060_x_at	1.98e-05	1.27e-06	-4.99788	4.92885	-0.89425	STOM	stomatin
201061_s_at	7.77e-05	6.76e-06	-4.62459	3.33883	-0.894127	STOM	stomatin
1553635_s_at	5.42e-08	1.11e-09	-6.39763	11.6891	-0.893553	TCTEX1D1	Tctex1 domain containing 1
235136_at	0.00166	0.00028	-3.69965	-0.16025	-0.89314	ORMDL3	ORMDL sphingolipid biosynthesis regulator 3
235787_at	1.87e-05	1.18e-06	-5.01367	4.99826	-0.89274	CDC37L1	cell division cycle 37 like 1
205098_at	0.00121	0.000189	-3.80474	0.20403	-0.892673	CCR1	C-C motif chemokine receptor 1
240362_at	4.96e-13	1.56e-15	-8.66768	24.7559	-0.892518	MPC1	mitochondrial pyruvate carrier 1
227522_at	0.00222	0.000402	-3.60024	-0.49667	-0.891314	CMBL	carboxymethylenebutenolidase homolog
228409_at	1.33e-05	7.87e-07	-5.10121	5.3859	-0.890387	PLIN4	perilipin 4
202081_at	0.000103	9.49e-06	-4.54615	3.01725	-0.890159	IER2	immediate early response 2
240904_at	0.0501	0.0188	-2.36839	-3.973	-0.890121
1557049_at	1.02e-05	5.67e-07	-5.17115	5.69935	-0.889899	BTBD19	BTB domain containing 19
225239_at	0.089	0.0387	-2.08171	-4.58911	-0.88923	MIR612///NEAT1	microRNA 612///nuclear paraspeckle assembly transcript 1 (non-protein coding)
224999_at	0.00248	0.00046	-3.56246	-0.62243	-0.888099	EGFR	epidermal growth factor receptor
201211_s_at	0.00205	0.000364	-3.62777	-0.40432	-0.887397	DDX3X	DEAD-box helicase 3, X-linked
202861_at	0.000231	2.53e-05	-4.31335	2.08917	-0.887029	MIR6883///PER1	microRNA 6883///period circadian clock 1
1554462_a_at	0.00116	0.00018	-3.81707	0.24736	-0.886916	DNAJB9	DnaJ heat shock protein family (Hsp40) member B9
229480_at	0.00596	0.00135	-3.25187	-1.61165	-0.886185	MAGI2-AS3	MAGI2 antisense RNA 3
228573_at	0.000343	4.09e-05	-4.19658	1.63882	-0.885855	ANTXR2	anthrax toxin receptor 2
213374_x_at	8.03e-06	4.24e-07	-5.23227	5.97587	-0.885695	HIBCH	3-hydroxyisobutyryl-CoA hydrolase
221215_s_at	1.1e-05	6.25e-07	-5.15041	5.60607	-0.885455	RIPK4	receptor interacting serine/threonine kinase 4
1565776_at	0.000276	3.14e-05	-4.26144	1.88772	-0.884819
233449_at	0.000679	9.4e-05	-3.987	0.85659	-0.884475
203658_at	7.31e-06	3.8e-07	-5.25537	6.08102	-0.882994	SLC25A20	solute carrier family 25 member 20
214470_at	0.000985	0.000148	-3.86973	0.43371	-0.882745	KLRB1	killer cell lectin like receptor B1
228821_at	2.26e-06	9.32e-08	-5.54461	7.42673	-0.881783	ST6GAL2	ST6 beta-galactoside alpha-2,6-sialyltransferase 2
217998_at	7.92e-08	1.75e-09	-6.3139	11.2525	-0.88131	PHLDA1	pleckstrin homology like domain family A member 1
214677_x_at	0.311	0.193	-1.30697	-5.8695	-0.881255	IGLC1	immunoglobulin lambda constant 1
243841_at	6.27e-09	8.77e-11	-6.85605	14.1442	-0.880875	SYNE2	spectrin repeat containing nuclear envelope protein 2
241968_at	4.66e-11	2.99e-13	-7.82385	19.6515	-0.880847	ABHD18	abhydrolase domain containing 18
212093_s_at	0.00172	0.000292	-3.68758	-0.20151	-0.879499	MTUS1	microtubule associated tumor suppressor 1
231011_at	0.000103	9.56e-06	-4.54462	3.01104	-0.87936	LARP1B	La ribonucleoprotein domain family member 1B
222313_at	0.0149	0.00419	-2.89723	-2.64163	-0.878947
206702_at	0.00557	0.00124	-3.27669	-1.53558	-0.878442	TEK	TEK receptor tyrosine kinase
1554878_a_at	0.0216	0.00661	-2.74468	-3.05118	-0.878404	ABCD3	ATP binding cassette subfamily D member 3
227542_at	2.79e-05	1.93e-06	-4.9063	4.52982	-0.877445	SOCS6	suppressor of cytokine signaling 6
243857_at	0.00122	0.000191	-3.80141	0.19235	-0.877051	MORF4L2	mortality factor 4 like 2
220494_s_at	0.000812	0.000117	-3.93079	0.65255	-0.876307
237006_at	0.00181	0.000312	-3.66934	-0.26366	-0.876058
218045_x_at	6.2e-06	3.12e-07	-5.29686	6.27079	-0.876015	PTMS	parathymosin
1556168_s_at	0.0367	0.0127	-2.51451	-3.63011	-0.875602	MROH2A	maestro heat like repeat family member 2A
225469_at	0.000707	9.87e-05	-3.9746	0.81136	-0.875308	LYRM5	LYR motif containing 5
218486_at	0.000204	2.17e-05	-4.35044	2.23435	-0.875007	KLF11	Kruppel like factor 11
214307_at	0.0082	0.002	-3.13256	-1.97019	-0.874993	HGD	homogentisate 1,2-dioxygenase
206259_at	0.00188	0.000326	-3.6576	-0.30354	-0.874823	PROC	protein C, inactivator of coagulation factors Va and VIIIa
206697_s_at	0.0214	0.00654	-2.74858	-3.04095	-0.874532	HP	haptoglobin
208327_at	1.41e-06	5.32e-08	-5.65732	7.96535	-0.874235	CYP2A13	cytochrome P450 family 2 subfamily A member 13
239683_at	0.000219	2.37e-05	-4.32905	2.1505	-0.873263	CLYBL	citrate lyase beta like
204958_at	4.25e-08	8.18e-10	-6.45406	11.9854	-0.873166	PLK3	polo like kinase 3
211262_at	1.58e-07	3.97e-09	-6.16028	10.4614	-0.873105	PCSK6	proprotein convertase subtilisin/kexin type 6
207298_at	0.0386	0.0135	-2.49144	-3.68553	-0.872952	SLC17A3	solute carrier family 17 member 3
209694_at	6.39e-06	3.23e-07	-5.28918	6.23559	-0.872648	PTS	6-pyruvoyltetrahydropterin synthase
1560359_at	0.000185	1.93e-05	-4.37852	2.34496	-0.872623	ITGA1	integrin subunit alpha 1
212365_at	5.36e-05	4.29e-06	-4.728	3.76953	-0.871933	MYO1B	myosin IB
242776_at	0.000314	3.67e-05	-4.2234	1.74137	-0.871739	ZCCHC6	zinc finger CCHC-type containing 6
240405_at	0.000435	5.43e-05	-4.12624	1.37253	-0.87119
233824_at	0.0104	0.00267	-3.04165	-2.23522	-0.87087
241368_at	0.00015	1.51e-05	-4.43799	2.58109	-0.870571	PLIN5	perilipin 5
223098_s_at	0.00015	1.5e-05	-4.43916	2.58576	-0.870528	LOC100507577///LONP2	uncharacterized LOC100507577///lon peptidase 2, peroxisomal
211890_x_at	0.000327	3.86e-05	-4.21054	1.69212	-0.870343	CAPN3	calpain 3
1562610_at	8.54e-10	8.62e-12	-7.25959	16.3903	-0.870227
205326_at	0.000168	1.72e-05	-4.40683	2.45705	-0.870137	RAMP3	receptor (G protein-coupled) activity modifying protein 3
203233_at	0.000223	2.43e-05	-4.32313	2.12738	-0.870067	IL4R	interleukin 4 receptor
216308_x_at	0.00188	0.000326	-3.65741	-0.30418	-0.870035	GRHPR	glyoxylate and hydroxypyruvate reductase
201300_s_at	0.0418	0.015	-2.45357	-3.77548	-0.869848	PRNP	prion protein
1566472_s_at	0.014	0.00387	-2.92324	-2.56978	-0.868866	LOC100996506///RETSAT	uncharacterized LOC100996506///retinol saturase
201347_x_at	0.00239	0.000438	-3.57612	-0.57709	-0.868802	GRHPR	glyoxylate and hydroxypyruvate reductase
1569311_at	7.83e-06	4.11e-07	-5.23892	6.00611	-0.868655
214505_s_at	0.000268	3.03e-05	-4.26985	1.92022	-0.867517	FHL1	four and a half LIM domains 1
215772_x_at	0.000283	3.24e-05	-4.25392	1.8587	-0.8672	SUCLG2	succinate-CoA ligase GDP-forming beta subunit
222357_at	0.0546	0.021	-2.32677	-4.06711	-0.867024	ZBTB20	zinc finger and BTB domain containing 20
229230_at	0.177	0.0924	-1.69096	-5.30599	-0.866925	SLC51A	solute carrier family 51 alpha subunit
242323_at	8.95e-06	4.82e-07	-5.20534	5.85373	-0.866795	PLA2G12A	phospholipase A2 group XIIA
209443_at	0.0197	0.0059	-2.78316	-2.9498	-0.866744	SERPINA5	serpin family A member 5
203608_at	0.0018	0.00031	-3.67164	-0.25587	-0.866586	ALDH5A1	aldehyde dehydrogenase 5 family member A1
220383_at	0.0294	0.00965	-2.61342	-3.38712	-0.865467	ABCG5	ATP binding cassette subfamily G member 5
225874_at	1.37e-06	5.14e-08	-5.66402	7.99763	-0.865387	UBALD1	UBA like domain containing 1
220046_s_at	1.66e-07	4.23e-09	-6.14855	10.4015	-0.865209	CCNL1	cyclin L1
207122_x_at	0.00377	0.000769	-3.41682	-1.09626	-0.864691	SULT1A2	sulfotransferase family 1A member 2
237363_at	3.82e-11	2.4e-13	-7.85974	19.8634	-0.864332	SPATA6L	spermatogenesis associated 6 like
227063_at	1.94e-06	7.79e-08	-5.58099	7.59973	-0.863988	TMEM256	transmembrane protein 256
213121_at	7.17e-07	2.39e-08	-5.81574	8.73553	-0.863576	SNRNP70	small nuclear ribonucleoprotein U1 subunit 70
225924_at	0.00142	0.00023	-3.75176	0.01928	-0.863379	FNIP2	folliculin interacting protein 2
228770_at	0.000127	1.23e-05	-4.48644	2.77541	-0.863072	GPR146	G protein-coupled receptor 146
203542_s_at	0.00441	0.000931	-3.36135	-1.27213	-0.862939	KLF9	Kruppel like factor 9
240188_at	3.16e-07	9.06e-09	-6.00334	9.66676	-0.862505
220108_at	3.93e-05	2.94e-06	-4.81278	4.12827	-0.862504	GNA14	G protein subunit alpha 14
203997_at	4.05e-06	1.87e-07	-5.40246	6.75874	-0.861865	PTPN3	protein tyrosine phosphatase, non-receptor type 3
229473_at	0.0157	0.00449	-2.87424	-2.70467	-0.860646	MAMDC4	MAM domain containing 4
336_at	3.73e-07	1.1e-08	-5.9665	9.48228	-0.860377	TBXA2R	thromboxane A2 receptor
214864_s_at	0.0017	0.00029	-3.69	-0.19325	-0.860305	GRHPR	glyoxylate and hydroxypyruvate reductase
205099_s_at	0.000339	4.03e-05	-4.20002	1.65196	-0.860235	CCR1	C-C motif chemokine receptor 1
231703_s_at	6.33e-06	3.2e-07	-5.29155	6.24646	-0.85929	ADH4	alcohol dehydrogenase 4 (class II), pi polypeptide
205369_x_at	0.00454	0.000963	-3.35124	-1.30389	-0.85821	DBT	dihydrolipoamide branched chain transacylase E2
212459_x_at	0.000463	5.88e-05	-4.10598	1.29654	-0.858173	SUCLG2	succinate-CoA ligase GDP-forming beta subunit
205939_at	0.232	0.131	-1.51516	-5.58148	-0.858162	CYP3A7-CYP3A51P///CYP3A7	CYP3A7-CYP3A51P readthrough///cytochrome P450 family 3 subfamily A member 7
218504_at	0.000483	6.19e-05	-4.09316	1.2486	-0.858159	FAHD2A	fumarylacetoacetate hydrolase domain containing 2A
206856_at	3.23e-06	1.42e-07	-5.45852	7.02065	-0.857822	LILRB5	leukocyte immunoglobulin like receptor B5
1555330_at	2.79e-08	4.99e-10	-6.54429	12.4628	-0.857461	GCLC	glutamate-cysteine ligase catalytic subunit
223395_at	0.0923	0.0405	-2.06217	-4.62835	-0.856754	ABI3BP	ABI family member 3 binding protein
210951_x_at	0.00244	0.00045	-3.56877	-0.60151	-0.856683	RAB27A	RAB27A, member RAS oncogene family
226179_at	0.000178	1.85e-05	-4.38938	2.3879	-0.855832	SLC25A37	solute carrier family 25 member 37
204134_at	2.57e-05	1.75e-06	-4.92799	4.6238	-0.855327	PDE2A	phosphodiesterase 2A
229019_at	0.0692	0.0282	-2.21083	-4.32096	-0.855008	ZNF385B	zinc finger protein 385B
231867_at	0.147	0.0731	-1.80159	-5.11758	-0.854584	TENM2	teneurin transmembrane protein 2
220266_s_at	0.00107	0.000163	-3.8434	0.34025	-0.854521	KLF4	Kruppel like factor 4
200986_at	0.000854	0.000124	-3.91517	0.59629	-0.854434	SERPING1	serpin family G member 1
220999_s_at	0.00536	0.00119	-3.28984	-1.49505	-0.854355	CYFIP2	cytoplasmic FMR1 interacting protein 2
227113_at	0.00152	0.00025	-3.72944	-0.05789	-0.853957	ADHFE1	alcohol dehydrogenase, iron containing 1
218124_at	0.000804	0.000116	-3.93398	0.66406	-0.853612	RETSAT	retinol saturase
238458_at	0.0244	0.00768	-2.69342	-3.18418	-0.853413	MICU3	mitochondrial calcium uptake family member 3
207560_at	0.000857	0.000125	-3.91426	0.59301	-0.853127	SLC28A1	solute carrier family 28 member 1
214508_x_at	2.94e-05	2.06e-06	-4.89204	4.46821	-0.852372	CREM	cAMP responsive element modulator
212402_at	0.000363	4.38e-05	-4.17929	1.57305	-0.852239	ZC3H13	zinc finger CCCH-type containing 13
209681_at	0.001	0.000151	-3.86358	0.41183	-0.852016	SLC19A2	solute carrier family 19 member 2
201739_at	0.0143	0.00397	-2.91432	-2.59449	-0.852008	SGK1	serum/glucocorticoid regulated kinase 1
218924_s_at	0.000185	1.93e-05	-4.37924	2.34781	-0.850767	CTBS	chitobiase
215299_x_at	0.00841	0.00206	-3.12296	-1.99851	-0.850429	SULT1A1	sulfotransferase family 1A member 1
242074_at	0.00206	0.000367	-3.62555	-0.41178	-0.84986
203473_at	0.00204	0.000362	-3.62876	-0.40097	-0.849787	SLCO2B1	solute carrier organic anion transporter family member 2B1
234989_at	0.0831	0.0355	-2.11734	-4.51667	-0.848929	MIR612///NEAT1	microRNA 612///nuclear paraspeckle assembly transcript 1 (non-protein coding)
220646_s_at	1.5e-09	1.68e-11	-7.14518	15.7458	-0.848784	KLRF1	killer cell lectin like receptor F1
234092_s_at	0.00836	0.00204	-3.12505	-1.99234	-0.848611	TM6SF2	transmembrane 6 superfamily member 2
218854_at	0.0167	0.00481	-2.85147	-2.76662	-0.84792	DSE	dermatan sulfate epimerase
1555269_a_at	0.000473	6.03e-05	-4.09986	1.27364	-0.847554	ANO1	anoctamin 1
222317_at	0.000287	3.29e-05	-4.24992	1.84327	-0.847526	PDE3B	phosphodiesterase 3B
216627_s_at	7.4e-07	2.48e-08	-5.80844	8.69966	-0.847051	B4GALT1	beta-1,4-galactosyltransferase 1
203504_s_at	0.000302	3.49e-05	-4.23531	1.78706	-0.846996	ABCA1	ATP binding cassette subfamily A member 1
205364_at	0.0139	0.00384	-2.92569	-2.56298	-0.846894	ACOX2	acyl-CoA oxidase 2
221920_s_at	0.000324	3.81e-05	-4.21365	1.70404	-0.846357	SLC25A37	solute carrier family 25 member 37
207300_s_at	0.0172	0.00499	-2.83921	-2.79981	-0.846337	F7	coagulation factor VII
228486_at	0.00726	0.00172	-3.17843	-1.83376	-0.846098	SLC44A1	solute carrier family 44 member 1
219492_at	2.39e-05	1.59e-06	-4.94846	4.71281	-0.845777	CHIC2	cysteine rich hydrophobic domain 2
229850_at	0.0012	0.000187	-3.80734	0.21314	-0.845654	KDSR	3-ketodihydrosphingosine reductase
229858_at	0.0144	0.00401	-2.91161	-2.60198	-0.84561
223344_s_at	0.00436	0.000918	-3.3654	-1.25936	-0.845257	MS4A7	membrane spanning 4-domains A7
214022_s_at	0.0374	0.0131	-2.50457	-3.65406	-0.844725	IFITM1	interferon induced transmembrane protein 1
223288_at	7.17e-05	6.16e-06	-4.64597	3.42726	-0.844218	USP38	ubiquitin specific peptidase 38
237346_at	2.74e-05	1.89e-06	-4.91054	4.54815	-0.843402	TGDS	TDP-glucose 4,6-dehydratase
217173_s_at	0.000309	3.6e-05	-4.22793	1.75875	-0.843265	LDLR	low density lipoprotein receptor
221556_at	0.0071	0.00167	-3.18717	-1.80757	-0.843018	CDC14B	cell division cycle 14B
222444_at	0.0801	0.0339	-2.13655	-4.4771	-0.843017	ARMCX3	armadillo repeat containing, X-linked 3
204263_s_at	0.000774	0.00011	-3.94641	0.70901	-0.842855	CPT2	carnitine palmitoyltransferase 2
235148_at	0.00237	0.000435	-3.57807	-0.57063	-0.84276	KRTCAP3	keratinocyte associated protein 3
396_f_at	1.53e-07	3.83e-09	-6.16726	10.497	-0.842352	EPOR	erythropoietin receptor
205305_at	0.0439	0.016	-2.43061	-3.82937	-0.841902	FGL1	fibrinogen like 1
231029_at	0.0827	0.0352	-2.12038	-4.51042	-0.841703	F5	coagulation factor V
219431_at	6.27e-09	8.77e-11	-6.85596	14.1436	-0.841362	ARHGAP10	Rho GTPase activating protein 10
203924_at	0.19	0.102	-1.64304	-5.384	-0.84083	GSTA1	glutathione S-transferase alpha 1
222239_s_at	0.000205	2.19e-05	-4.34858	2.22705	-0.840497	INTS6	integrator complex subunit 6
227448_at	4.37e-06	2.06e-07	-5.38275	6.66711	-0.839005	ARGLU1	arginine and glutamate rich 1
221768_at	0.00794	0.00191	-3.14531	-1.93245	-0.838707	SFPQ	splicing factor proline and glutamine rich
244548_at	3.06e-05	2.16e-06	-4.88137	4.42219	-0.838281
203722_at	0.00157	0.000262	-3.71765	-0.09849	-0.837734	ALDH4A1	aldehyde dehydrogenase 4 family member A1
204140_at	0.00175	0.000299	-3.68118	-0.22335	-0.837673	TPST1	tyrosylprotein sulfotransferase 1
226238_at	0.000143	1.42e-05	-4.45192	2.6368	-0.837527	MCEE	methylmalonyl-CoA epimerase
239045_at	1.23e-11	6.46e-14	-8.07396	21.1379	-0.836287
211385_x_at	0.00763	0.00182	-3.16003	-1.88871	-0.836249	SULT1A2	sulfotransferase family 1A member 2
201695_s_at	0.00169	0.000287	-3.69273	-0.18394	-0.836041	PNP	purine nucleoside phosphorylase
214203_s_at	0.016	0.00459	-2.86691	-2.72465	-0.835974	LOC102724788///PRODH	proline dehydrogenase 1, mitochondrial///proline dehydrogenase 1
230309_at	0.0377	0.0132	-2.50151	-3.66141	-0.835595	BHMT2	betaine--homocysteine S-methyltransferase 2
201939_at	0.00268	0.000505	-3.53621	-0.70913	-0.835337	PLK2	polo like kinase 2
214584_x_at	1.64e-06	6.36e-08	-5.62165	7.79404	-0.835147	ACACB	acetyl-CoA carboxylase beta
206957_at	0.0525	0.0199	-2.34673	-4.02219	-0.834939	AGXT	alanine-glyoxylate aminotransferase
223159_s_at	0.000135	1.32e-05	-4.46973	2.7082	-0.834905	NEK6	NIMA related kinase 6
218923_at	0.000133	1.3e-05	-4.47278	2.72047	-0.834841	CTBS	chitobiase
1554997_a_at	1.21e-08	1.89e-10	-6.71987	13.4037	-0.83413	PTGS2	prostaglandin-endoperoxide synthase 2
223912_s_at	8.01e-08	1.77e-09	-6.31121	11.2385	-0.834012	CLN8	ceroid-lipofuscinosis, neuronal 8
240361_at	9.73e-05	8.9e-06	-4.56126	3.07884	-0.833483	LOC101927972	uncharacterized LOC101927972
230907_at	5.48e-07	1.72e-08	-5.87948	9.04961	-0.832612	GPRC5C	G protein-coupled receptor class C group 5 member C
227049_at	1.59e-05	9.69e-07	-5.05641	5.18685	-0.832082	ZADH2	zinc binding alcohol dehydrogenase domain containing 2
235516_at	0.000233	2.56e-05	-4.31083	2.07937	-0.831852	SEPSECS	Sep (O-phosphoserine) tRNA:Sec (selenocysteine) tRNA synthase
224565_at	0.00416	0.000867	-3.38197	-1.20705	-0.831755	MIR612///NEAT1	microRNA 612///nuclear paraspeckle assembly transcript 1 (non-protein coding)
233496_s_at	0.00768	0.00184	-3.15748	-1.8963	-0.83159	CFL2	cofilin 2
201627_s_at	0.0682	0.0277	-2.21828	-4.30503	-0.831237	INSIG1	insulin induced gene 1
229584_at	0.000798	0.000114	-3.9363	0.67243	-0.830939	LRRK2	leucine rich repeat kinase 2
1552616_a_at	4.21e-05	3.2e-06	-4.79429	4.04961	-0.830774	ACACB	acetyl-CoA carboxylase beta
211322_s_at	6.69e-09	9.48e-11	-6.84222	14.0685	-0.83058	SARDH	sarcosine dehydrogenase
229718_at	1.93e-05	1.23e-06	-5.00433	4.95718	-0.830399	N4BP2L1	NEDD4 binding protein 2 like 1
214446_at	0.00183	0.000315	-3.66687	-0.27206	-0.830175	ELL2	elongation factor for RNA polymerase II 2
223136_at	0.000437	5.47e-05	-4.1242	1.36486	-0.830034	AIG1	androgen induced 1
207667_s_at	6.36e-09	8.92e-11	-6.85292	14.1271	-0.829958	LOC100996792///MAP2K3	dual specificity mitogen-activated protein kinase kinase 3///mitogen-activated protein kinase kinase 3
213750_at	0.000442	5.55e-05	-4.12052	1.35103	-0.829714	RSL1D1	ribosomal L1 domain containing 1
201464_x_at	3.81e-05	2.84e-06	-4.82076	4.16233	-0.829659	JUN	Jun proto-oncogene, AP-1 transcription factor subunit
1555800_at	0.0971	0.0432	-2.03479	-4.68274	-0.829456	ZNF385B	zinc finger protein 385B
214910_s_at	0.033	0.0112	-2.5615	-3.51577	-0.828764	APOM	apolipoprotein M
214787_at	0.00101	0.000152	-3.86298	0.40969	-0.828155	DENND4A	DENN domain containing 4A
225954_s_at	0.00177	0.000303	-3.67753	-0.23579	-0.828108	MIDN	midnolin
239557_at	0.0163	0.0047	-2.85926	-2.74546	-0.827642
236155_at	0.000885	0.00013	-3.90409	0.55651	-0.827482	ZCCHC6	zinc finger CCHC-type containing 6
1555996_s_at	0.0189	0.00561	-2.80057	-2.90349	-0.82748	MIR1248///SNORA81///SNORA4///SNORD2///SNORA63///EIF4A2	microRNA 1248///small nucleolar RNA, H/ACA box 81///small nucleolar RNA, H/ACA box 4///small nucleolar RNA, C/D box 2///small nucleolar RNA, H/ACA box 63///eukaryotic translation initiation factor 4A2
242300_at	0.000706	9.85e-05	-3.97505	0.81301	-0.827256
207071_s_at	2.04e-05	1.31e-06	-4.99101	4.89875	-0.82628	ACO1	aconitase 1
231919_at	0.000811	0.000117	-3.93124	0.65419	-0.826267	DBT	dihydrolipoamide branched chain transacylase E2
202817_s_at	0.00177	0.000303	-3.67803	-0.23408	-0.825444	SS18	SS18, nBAF chromatin remodeling complex subunit
244310_at	0.000588	7.86e-05	-4.03293	1.02513	-0.82516
225102_at	0.0297	0.00978	-2.60861	-3.39914	-0.824907	MGLL	monoglyceride lipase
229455_at	0.0265	0.00851	-2.65774	-3.27539	-0.824877	LOC102723694	uncharacterized LOC102723694
236243_at	0.000483	6.18e-05	-4.09346	1.24971	-0.824781	ZCCHC6	zinc finger CCHC-type containing 6
221552_at	0.000226	2.47e-05	-4.31997	2.11502	-0.824757	ABHD6	abhydrolase domain containing 6
207491_at	6.66e-06	3.4e-07	-5.27864	6.1873	-0.823332	MOGAT2	monoacylglycerol O-acyltransferase 2
229434_at	0.00722	0.00171	-3.18058	-1.82733	-0.823022
220753_s_at	0.00733	0.00174	-3.17489	-1.84438	-0.822965	CRYL1	crystallin lambda 1
229376_at	0.0012	0.000187	-3.80717	0.21255	-0.822955	PROX1	prospero homeobox 1
212419_at	5.28e-05	4.21e-06	-4.73255	3.78866	-0.822849	ZCCHC24	zinc finger CCHC-type containing 24
203836_s_at	0.0222	0.00684	-2.73304	-3.08158	-0.822781	MAP3K5	mitogen-activated protein kinase kinase kinase 5
208707_at	1.85e-07	4.78e-09	-6.12523	10.2827	-0.822204	EIF5	eukaryotic translation initiation factor 5
234730_s_at	2.46e-05	1.66e-06	-4.93992	4.67564	-0.821414	RIPK4	receptor interacting serine/threonine kinase 4
233748_x_at	7.79e-05	6.78e-06	-4.62381	3.33563	-0.821171	PRKAG2	protein kinase AMP-activated non-catalytic subunit gamma 2
202843_at	0.00206	0.000366	-3.62573	-0.41116	-0.820688	DNAJB9	DnaJ heat shock protein family (Hsp40) member B9
240569_at	0.0107	0.00278	-3.02924	-2.27085	-0.819927
211143_x_at	9.62e-10	9.92e-12	-7.2355	16.2541	-0.819702	NR4A1	nuclear receptor subfamily 4 group A member 1
218631_at	0.000198	2.1e-05	-4.35888	2.26756	-0.819339	AVPI1	arginine vasopressin induced 1
1555538_s_at	4.16e-05	3.15e-06	-4.79793	4.06507	-0.818912	FAM9B	family with sequence similarity 9 member B
203571_s_at	0.106	0.0483	-1.987	-4.77599	-0.818558	ADIRF	adipogenesis regulatory factor
203638_s_at	0.222	0.125	-1.54249	-5.54058	-0.818472	FGFR2	fibroblast growth factor receptor 2
238951_at	0.000933	0.000138	-3.88706	0.49554	-0.818439
213362_at	0.00546	0.00121	-3.28352	-1.51453	-0.817274	PTPRD	protein tyrosine phosphatase, receptor type D
204880_at	4.72e-05	3.69e-06	-4.76223	3.91379	-0.817218	MGMT	O-6-methylguanine-DNA methyltransferase
242985_x_at	8.11e-07	2.76e-08	-5.78692	8.59428	-0.816984	RNF180	ring finger protein 180
237746_at	7.81e-09	1.14e-10	-6.80987	13.892	-0.816918
204231_s_at	0.000329	3.88e-05	-4.20946	1.68801	-0.816802	FAAH	fatty acid amide hydrolase
244313_at	0.00141	0.000229	-3.75371	0.02604	-0.816796	CR1	complement component 3b/4b receptor 1 (Knops blood group)
229223_at	0.00123	0.000193	-3.79874	0.18299	-0.816428
1554533_at	0.0117	0.0031	-2.99413	-2.37092	-0.815766	C2	complement component 2
214048_at	5e-06	2.42e-07	-5.34966	6.51383	-0.815046	MBD4	methyl-CpG binding domain 4, DNA glycosylase
234122_at	4.37e-10	3.9e-12	-7.39462	17.1585	-0.814204
205200_at	0.0146	0.00407	-2.90622	-2.61685	-0.814126	EXOSC7///CLEC3B	exosome component 7///C-type lectin domain family 3 member B
218931_at	0.000886	0.00013	-3.90349	0.55436	-0.813521	RAB17	RAB17, member RAS oncogene family
221758_at	1.14e-06	4.15e-08	-5.70674	8.20398	-0.813402	ARMC6	armadillo repeat containing 6
203198_at	2.15e-05	1.4e-06	-4.97618	4.8338	-0.813083	CDK9	cyclin dependent kinase 9
221234_s_at	0.00674	0.00157	-3.2059	-1.75122	-0.813077	BACH2	BTB domain and CNC homolog 2
225619_at	0.0256	0.00813	-2.67367	-3.23481	-0.812976	SLAIN1	SLAIN motif family member 1
200776_s_at	0.000665	9.16e-05	-3.99378	0.88136	-0.812974	BZW1	basic leucine zipper and W2 domains 1
221614_s_at	2.05e-05	1.32e-06	-4.98913	4.89048	-0.812809	RPH3AL	rabphilin 3A-like (without C2 domains)
215126_at	0.0305	0.0101	-2.59777	-3.42614	-0.812797	LINC01314	long intergenic non-protein coding RNA 1314
209600_s_at	0.000669	9.22e-05	-3.99206	0.87506	-0.812777	ACOX1	acyl-CoA oxidase 1
206250_x_at	1.88e-11	1.03e-13	-7.99833	20.6859	-0.812303	AVPR1A	arginine vasopressin receptor 1A
203757_s_at	1.04e-05	5.81e-07	-5.16593	5.67583	-0.812191	CEACAM6	carcinoembryonic antigen related cell adhesion molecule 6
237238_at	2.01e-05	1.29e-06	-4.99471	4.91497	-0.811526	WWC1	WW and C2 domain containing 1
233480_at	0.000154	1.55e-05	-4.43036	2.55066	-0.811449	TMEM43	transmembrane protein 43
237212_at	0.0204	0.00617	-2.76808	-2.98968	-0.811367
207808_s_at	6.93e-05	5.9e-06	-4.6558	3.46805	-0.811054	PROS1	protein S (alpha)
207810_at	0.0997	0.0447	-2.02065	-4.71055	-0.810861	F13B	coagulation factor XIII B chain
235049_at	0.0104	0.00268	-3.04103	-2.23701	-0.810298	ADCY1	adenylate cyclase 1
221646_s_at	0.0169	0.00489	-2.84622	-2.78085	-0.809478	ZDHHC11B///ZDHHC11	zinc finger DHHC-type containing 11B///zinc finger DHHC-type containing 11
230329_s_at	0.00652	0.00151	-3.21826	-1.71388	-0.809071	NUDT6	nudix hydrolase 6
231702_at	0.000186	1.94e-05	-4.37726	2.33998	-0.808581	TDO2	tryptophan 2,3-dioxygenase
221605_s_at	0.0223	0.00688	-2.73106	-3.08674	-0.808505	PIPOX	pipecolic acid and sarcosine oxidase
222582_at	0.000176	1.82e-05	-4.39309	2.40257	-0.80801	PRKAG2	protein kinase AMP-activated non-catalytic subunit gamma 2
221159_at	0.167	0.0861	-1.72483	-5.24953	-0.807947
1568779_a_at	0.00154	0.000254	-3.72544	-0.07169	-0.807802	ECM2	extracellular matrix protein 2
212514_x_at	0.00344	0.000687	-3.44904	-0.99293	-0.806906	DDX3X	DEAD-box helicase 3, X-linked
207993_s_at	0.000454	5.73e-05	-4.11257	1.32122	-0.806745	CHP1	calcineurin like EF-hand protein 1
201367_s_at	0.00848	0.00208	-3.11975	-2.00795	-0.806474	ZFP36L2	ZFP36 ring finger protein like 2
229693_at	0.00296	0.000572	-3.50128	-0.82361	-0.806355	TMEM220	transmembrane protein 220
1561362_at	4.96e-10	4.54e-12	-7.36889	17.0115	-0.806352
237496_at	3.89e-07	1.16e-08	-5.95633	9.43145	-0.806281
225688_s_at	0.00246	0.000455	-3.56588	-0.61109	-0.80624	PHLDB2	pleckstrin homology like domain family B member 2
209193_at	1.97e-07	5.19e-09	-6.1097	10.2037	-0.806091	PIM1	Pim-1 proto-oncogene, serine/threonine kinase
230097_at	0.0439	0.0159	-2.43136	-3.8276	-0.806024	GART	phosphoribosylglycinamide formyltransferase, phosphoribosylglycinamide synthetase, phosphoribosylaminoimidazole synthetase
211395_x_at	0.00853	0.0021	-3.11741	-2.01484	-0.805991	FCGR2C	Fc fragment of IgG receptor IIc (gene/pseudogene)
236338_at	0.000791	0.000113	-3.93945	0.68381	-0.805459
229468_at	0.000211	2.28e-05	-4.33919	2.19021	-0.805331	TEN1-CDK3///CDK3	TEN1-CDK3 readthrough (NMD candidate)///cyclin dependent kinase 3
202886_s_at	0.00503	0.00109	-3.31387	-1.42062	-0.805272	PPP2R1B	protein phosphatase 2 scaffold subunit Abeta
204541_at	0.0602	0.0237	-2.27953	-4.17203	-0.804393	SEC14L2	SEC14 like lipid binding 2
203881_s_at	0.0258	0.00823	-2.66931	-3.24593	-0.804239	DMD	dystrophin
204544_at	0.00099	0.000149	-3.86823	0.42837	-0.80415	HPS5	HPS5, biogenesis of lysosomal organelles complex 2 subunit 2
222717_at	0.0386	0.0136	-2.49099	-3.68662	-0.803612	SDPR	serum deprivation response
235267_at	2.22e-06	9.1e-08	-5.54954	7.45016	-0.803125	MAGI2-AS3	MAGI2 antisense RNA 3
1569607_s_at	0.00177	0.000302	-3.67875	-0.23165	-0.803072	LOC102725051///LOC102723891///ANKRD20A4///ANKRD20A2///ANKRD20A3///ANKRD20A5P///ANKRD20A11P///ANKRD20A9P///ANKRD20A1	uncharacterized LOC102725051///ankyrin repeat domain-containing protein 20B-like///ankyrin repeat domain 20 family member A4///ankyrin repeat domain 20 family member A2///ankyrin repeat domain 20 family member A3///ankyrin repeat domain 20 family member A5, pseudogene///ankyrin repeat domain 20 family member A11, pseudogene///ankyrin repeat domain 20 family member A9, pseudogene///ankyrin repeat …
205894_at	0.0192	0.00573	-2.79333	-2.92278	-0.802995	ARSE	arylsulfatase E (chondrodysplasia punctata 1)
209447_at	0.00103	0.000156	-3.85583	0.38432	-0.802884	SYNE1	spectrin repeat containing nuclear envelope protein 1
218717_s_at	6.33e-05	5.28e-06	-4.68111	3.57331	-0.802429	P3H2	prolyl 3-hydroxylase 2
226519_s_at	0.000413	5.11e-05	-4.14109	1.42844	-0.802359	PHYKPL	5-phosphohydroxy-L-lysine phospho-lyase
201886_at	4e-05	3e-06	-4.80849	4.11003	-0.801964	DCAF11	DDB1 and CUL4 associated factor 11
212019_at	0.000284	3.25e-05	-4.25275	1.85417	-0.801702	RSL1D1	ribosomal L1 domain containing 1
204419_x_at	5.29e-05	4.22e-06	-4.73221	3.78723	-0.801594	HBG2///HBG1	hemoglobin subunit gamma 2///hemoglobin subunit gamma 1
225524_at	0.00111	0.000172	-3.83049	0.29466	-0.801554	ANTXR2	anthrax toxin receptor 2
203294_s_at	0.00997	0.00255	-3.05651	-2.19238	-0.801189	LMAN1	lectin, mannose binding 1
237456_at	0.00236	0.000432	-3.57993	-0.56443	-0.801142
226267_at	0.000443	5.57e-05	-4.11985	1.34855	-0.801049	JDP2	Jun dimerization protein 2
223289_s_at	0.000133	1.3e-05	-4.47238	2.71887	-0.800512	USP38	ubiquitin specific peptidase 38
220005_at	0.00797	0.00192	-3.14389	-1.93667	-0.80048	P2RY13	purinergic receptor P2Y13
227982_at	0.000867	0.000126	-3.91051	0.57956	-0.799972	SEPSECS	Sep (O-phosphoserine) tRNA:Sec (selenocysteine) tRNA synthase
230677_at	0.00303	0.000589	-3.49284	-0.85112	-0.799874	EXOC3L4	exocyst complex component 3 like 4
228717_at	0.00474	0.00102	-3.33556	-1.353	-0.79968
1552362_a_at	0.0417	0.0149	-2.45556	-3.77077	-0.799321	LEAP2	liver enriched antimicrobial peptide 2
239576_at	0.0181	0.00533	-2.81772	-2.85762	-0.798084	MTUS1	microtubule associated tumor suppressor 1
205303_at	0.03	0.00992	-2.60383	-3.41108	-0.797453	KCNJ8	potassium voltage-gated channel subfamily J member 8
217288_at	9.69e-07	3.42e-08	-5.74498	8.38963	-0.797286
203455_s_at	0.000154	1.54e-05	-4.4318	2.55642	-0.797272	SAT1	spermidine/spermine N1-acetyltransferase 1
228084_at	0.00128	0.000203	-3.78551	0.13672	-0.796746	PLA2G12A	phospholipase A2 group XIIA
232120_at	2.63e-06	1.12e-07	-5.5075	7.25115	-0.796682
233555_s_at	0.0216	0.00661	-2.74491	-3.05057	-0.796605	SULF2	sulfatase 2
227728_at	0.000517	6.74e-05	-4.0718	1.16903	-0.796361	PPM1A	protein phosphatase, Mg2+/Mn2+ dependent 1A
201262_s_at	0.00352	0.000706	-3.44118	-1.01821	-0.796202	BGN	biglycan
219915_s_at	0.00765	0.00183	-3.15937	-1.89066	-0.795927	SLC16A10	solute carrier family 16 member 10
224151_s_at	0.00757	0.00181	-3.1633	-1.87896	-0.795741	AK3	adenylate kinase 3
201925_s_at	0.0385	0.0135	-2.49248	-3.68306	-0.794836	CD55	CD55 molecule (Cromer blood group)
239860_at	0.126	0.0605	-1.88784	-4.9627	-0.794654	LOC100130232	LP2209
203634_s_at	0.00414	0.000861	-3.38404	-1.20049	-0.794183	CPT1A	carnitine palmitoyltransferase 1A
226096_at	0.199	0.108	-1.61504	-5.42857	-0.793912	FNDC5	fibronectin type III domain containing 5
237029_at	0.0435	0.0158	-2.43528	-3.81843	-0.79368	HGD	homogentisate 1,2-dioxygenase
205756_s_at	0.00305	0.000593	-3.49087	-0.85753	-0.793015	F8	coagulation factor VIII
205354_at	0.00515	0.00113	-3.30471	-1.44905	-0.792834	GAMT	guanidinoacetate N-methyltransferase
205258_at	0.0128	0.00346	-2.95917	-2.46953	-0.792173	INHBB	inhibin beta B subunit
1559000_at	2.53e-06	1.07e-07	-5.51665	7.29435	-0.79182	PRR26	proline rich 26
209956_s_at	3.28e-05	2.35e-06	-4.86249	4.34096	-0.791789	CAMK2B	calcium/calmodulin dependent protein kinase II beta
215210_s_at	0.000274	3.12e-05	-4.26319	1.89446	-0.791657	DLST	dihydrolipoamide S-succinyltransferase
239065_at	0.00136	0.00022	-3.76411	0.06214	-0.791526	DNAJC22	DnaJ heat shock protein family (Hsp40) member C22
235341_at	0.00816	0.00198	-3.13464	-1.96404	-0.791526	DNAJC3	DnaJ heat shock protein family (Hsp40) member C3
239252_at	0.00111	0.00017	-3.83217	0.30058	-0.791323	COX7B	cytochrome c oxidase subunit 7B
210753_s_at	3.5e-13	1.02e-15	-8.73463	25.1712	-0.791267	EPHB1	EPH receptor B1
213325_at	0.00983	0.0025	-3.06224	-2.17582	-0.791129	NECTIN3	nectin cell adhesion molecule 3
238929_at	2.62e-05	1.79e-06	-4.92246	4.59982	-0.791064	SRSF8	serine and arginine rich splicing factor 8
244731_at	0.005	0.00109	-3.31589	-1.41434	-0.790714
211600_at	0.00245	0.000453	-3.56681	-0.60801	-0.790679	PTPRO	protein tyrosine phosphatase, receptor type O
227977_at	2.6e-08	4.58e-10	-6.55973	12.5449	-0.790431	ZADH2	zinc binding alcohol dehydrogenase domain containing 2
203335_at	0.00135	0.000217	-3.76775	0.07482	-0.790056	PHYH	phytanoyl-CoA 2-hydroxylase
1556420_s_at	0.00114	0.000177	-3.82292	0.26796	-0.789919	YPEL2	yippee like 2
241547_at	0.0151	0.00426	-2.89153	-2.65729	-0.789804	A1CF	APOBEC1 complementation factor
217707_x_at	0.00127	0.000202	-3.78771	0.1444	-0.788292	SMARCA2	SWI/SNF related, matrix associated, actin dependent regulator of chromatin, subfamily a, member 2
213501_at	0.00347	0.000693	-3.44644	-1.0013	-0.788214	ACOX1	acyl-CoA oxidase 1
207589_at	4.87e-17	5.09e-20	-10.2382	34.8142	-0.788153	ADRA1B	adrenoceptor alpha 1B
1560869_a_at	0.00971	0.00246	-3.06729	-2.16118	-0.787925
212848_s_at	2.58e-05	1.75e-06	-4.92746	4.62153	-0.787721	C9orf3	chromosome 9 open reading frame 3
221419_s_at	0.00484	0.00104	-3.32837	-1.37547	-0.787377
213071_at	0.000311	3.63e-05	-4.22607	1.7516	-0.78696	DPT	dermatopontin
203640_at	0.00389	0.000798	-3.40611	-1.1304	-0.786753	MBNL2	muscleblind like splicing regulator 2
201169_s_at	0.0183	0.00539	-2.81375	-2.86826	-0.786564	BHLHE40	basic helix-loop-helix family member e40
225024_at	0.000216	2.34e-05	-4.33308	2.16629	-0.786542	RPRD1B	regulation of nuclear pre-mRNA domain containing 1B
221919_at	0.000678	9.38e-05	-3.98774	0.85929	-0.786472	HNRNPA1	heterogeneous nuclear ribonucleoprotein A1
227919_at	2.81e-05	1.95e-06	-4.90443	4.52173	-0.786299	UCA1	urothelial cancer associated 1 (non-protein coding)
206020_at	0.000255	2.85e-05	-4.28487	1.9784	-0.786067	SOCS6	suppressor of cytokine signaling 6
202071_at	0.000617	8.35e-05	-4.01733	0.9677	-0.785747	SDC4	syndecan 4
225669_at	1.7e-06	6.66e-08	-5.61248	7.75013	-0.785545	IFNAR1	interferon alpha and beta receptor subunit 1
224197_s_at	3.27e-08	6.01e-10	-6.51042	12.2831	-0.785444	C1QTNF1	C1q and tumor necrosis factor related protein 1
208131_s_at	0.038	0.0133	-2.49728	-3.67156	-0.78513	PTGIS	prostaglandin I2 (prostacyclin) synthase
209514_s_at	0.00372	0.000755	-3.42206	-1.07951	-0.784308	RAB27A	RAB27A, member RAS oncogene family
237504_at	7.07e-12	3.35e-14	-8.1802	21.7764	-0.783621	INTS10	integrator complex subunit 10
232522_at	0.00079	0.000113	-3.93949	0.68396	-0.783575
239183_at	0.00257	0.000481	-3.54987	-0.66408	-0.782655	ANGPTL1	angiopoietin like 1
231073_at	2.97e-06	1.29e-07	-5.47927	7.11809	-0.78263	C1orf168	chromosome 1 open reading frame 168
239327_at	0.011	0.00289	-3.01648	-2.30735	-0.782477
209800_at	2.35e-11	1.34e-13	-7.95478	20.4267	-0.782466	KRT16	keratin 16
212515_s_at	0.00163	0.000274	-3.70536	-0.14067	-0.782335	DDX3X	DEAD-box helicase 3, X-linked
236266_at	0.00643	0.00148	-3.22368	-1.69747	-0.782199	RORA	RAR related orphan receptor A
243614_s_at	0.00165	0.000278	-3.70093	-0.15586	-0.780954	PRODH2	proline dehydrogenase 2
227265_at	0.0319	0.0107	-2.57708	-3.47743	-0.780085	FGL2	fibrinogen like 2
221815_at	0.00497	0.00108	-3.31834	-1.40671	-0.779685	ABHD2	abhydrolase domain containing 2
235770_at	0.00279	0.000532	-3.52169	-0.75684	-0.779157	MASP1	mannan binding lectin serine peptidase 1
205682_x_at	0.05	0.0188	-2.36962	-3.9702	-0.779127	APOM	apolipoprotein M
217289_s_at	0.0061	0.00139	-3.24286	-1.63915	-0.779072	SLC37A4	solute carrier family 37 member 4
1559623_at	4.24e-09	5.62e-11	-6.93445	14.5746	-0.779019	C11orf54	chromosome 11 open reading frame 54
203407_at	0.0112	0.00295	-3.01037	-2.32477	-0.778821	PPL	periplakin
232810_at	0.00974	0.00247	-3.06599	-2.16495	-0.778809	AIG1	androgen induced 1
214370_at	5.86e-06	2.91e-07	-5.31107	6.33603	-0.778737	S100A8	S100 calcium binding protein A8
218182_s_at	0.0207	0.00629	-2.76183	-3.00616	-0.778454	CLDN1	claudin 1
1563478_at	5.6e-07	1.77e-08	-5.87424	9.02367	-0.777717	KIAA1671	KIAA1671
235482_at	0.000142	1.41e-05	-4.45426	2.64618	-0.777533	PCBP1-AS1	PCBP1 antisense RNA 1
224832_at	0.000658	9.05e-05	-3.99693	0.89286	-0.776187	DUSP16	dual specificity phosphatase 16
204385_at	0.00869	0.00215	-3.10985	-2.03706	-0.77588	KYNU	kynureninase
225623_at	0.000552	7.3e-05	-4.05165	1.09427	-0.775627	CIPC	CLOCK interacting pacemaker
224795_x_at	0.263	0.155	-1.42674	-5.70889	-0.775118	IGK///IGKC	immunoglobulin kappa locus///immunoglobulin kappa constant
201135_at	4.51e-05	3.48e-06	-4.77529	3.96904	-0.774977	ECHS1	enoyl-CoA hydratase, short chain 1
1562468_at	1.08e-10	8.05e-13	-7.65966	18.6889	-0.774822
219615_s_at	0.000841	0.000122	-3.92017	0.61427	-0.77402	KCNK5	potassium two pore domain channel subfamily K member 5
219496_at	0.000334	3.96e-05	-4.20413	1.66767	-0.773626	SOWAHC	sosondowah ankyrin repeat domain family member C
206078_at	0.0026	0.000488	-3.54602	-0.6768	-0.77332	KALRN	kalirin, RhoGEF kinase
205017_s_at	0.00111	0.00017	-3.8324	0.30139	-0.773064	MBNL2	muscleblind like splicing regulator 2
228760_at	0.00151	0.000248	-3.73205	-0.04887	-0.773	SRSF8	serine and arginine rich splicing factor 8
209384_at	0.000105	9.79e-06	-4.53893	2.98786	-0.772418	PROSC	proline synthetase cotranscribed homolog (bacterial)
214917_at	0.00341	0.00068	-3.45215	-0.98293	-0.772219	PRKAA1	protein kinase AMP-activated catalytic subunit alpha 1
211682_x_at	0.031	0.0103	-2.58939	-3.44696	-0.772173	UGT2B28	UDP glucuronosyltransferase family 2 member B28
206034_at	0.00183	0.000316	-3.66643	-0.27357	-0.771846	SERPINB8	serpin family B member 8
203758_at	0.00812	0.00197	-3.13668	-1.95802	-0.771589	CTSO	cathepsin O
209034_at	5.58e-08	1.15e-09	-6.39163	11.6576	-0.771416	PNRC1	proline rich nuclear receptor coactivator 1
1565778_at	5.09e-10	4.71e-12	-7.36261	16.9757	-0.771123	ABCA8	ATP binding cassette subfamily A member 8
214889_at	0.0137	0.00377	-2.93153	-2.54673	-0.770722	FAM149A	family with sequence similarity 149 member A
235751_s_at	4.63e-06	2.2e-07	-5.36894	6.60306	-0.770496	VMO1	vitelline membrane outer layer 1 homolog
214156_at	0.206	0.113	-1.593	-5.46313	-0.770448	MYRIP	myosin VIIA and Rab interacting protein
235344_at	0.000122	1.17e-05	-4.49688	2.81751	-0.77042	PPM1A	protein phosphatase, Mg2+/Mn2+ dependent 1A
211689_s_at	0.0119	0.00316	-2.98838	-2.38723	-0.770111	TMPRSS2	transmembrane protease, serine 2
226608_at	0.000491	6.3e-05	-4.08857	1.23148	-0.769905	C16orf87	chromosome 16 open reading frame 87
210298_x_at	0.00165	0.000277	-3.70195	-0.15236	-0.769866	FHL1	four and a half LIM domains 1
239492_at	0.0948	0.0419	-2.04753	-4.65751	-0.769657	SEC14L4	SEC14 like lipid binding 4
210592_s_at	0.000135	1.33e-05	-4.4677	2.70004	-0.769635	SAT1	spermidine/spermine N1-acetyltransferase 1
206894_at	0.00289	0.000554	-3.51017	-0.79457	-0.769552	APOA4	apolipoprotein A4
211483_x_at	4.31e-10	3.85e-12	-7.39708	17.1725	-0.769514	CAMK2B	calcium/calmodulin dependent protein kinase II beta
218312_s_at	0.0767	0.032	-2.1593	-4.42982	-0.769441	ZSCAN18	zinc finger and SCAN domain containing 18
213805_at	0.00219	0.000395	-3.60519	-0.4801	-0.768724	ABHD5	abhydrolase domain containing 5
200947_s_at	0.0097	0.00246	-3.06766	-2.16012	-0.768695	GLUD1	glutamate dehydrogenase 1
203887_s_at	0.0181	0.00532	-2.81813	-2.85654	-0.768017	THBD	thrombomodulin
238610_s_at	0.00956	0.00241	-3.07338	-2.14353	-0.767803
1559759_at	6.58e-08	1.4e-09	-6.35543	11.4686	-0.767579	KIFC3	kinesin family member C3
219250_s_at	0.0768	0.0321	-2.1585	-4.4315	-0.76744	FLRT3	fibronectin leucine rich transmembrane protein 3
202982_s_at	0.00619	0.00141	-3.23747	-1.65559	-0.767211	ACOT1///ACOT2	acyl-CoA thioesterase 1///acyl-CoA thioesterase 2
219268_at	0.0692	0.0282	-2.21046	-4.32176	-0.767192	ETNK2	ethanolamine kinase 2
237439_at	3.23e-06	1.43e-07	-5.4584	7.02011	-0.76697	USP43	ubiquitin specific peptidase 43
242058_at	0.000537	7.06e-05	-4.05989	1.12482	-0.766702
228101_at	0.0328	0.0111	-2.56414	-3.50928	-0.766448	APBA1	amyloid beta precursor protein binding family A member 1
212412_at	4.76e-05	3.73e-06	-4.7597	3.90309	-0.766034	PDLIM5	PDZ and LIM domain 5
206140_at	0.0119	0.00318	-2.98675	-2.39183	-0.765846	LHX2	LIM homeobox 2
239968_at	4.08e-10	3.6e-12	-7.40836	17.2371	-0.76564	LINC00313	long intergenic non-protein coding RNA 313
238180_at	1.35e-11	7.29e-14	-8.05451	21.0215	-0.765482	LOC102724094	uncharacterized LOC102724094
214465_at	0.00721	0.0017	-3.18138	-1.82494	-0.765303	ORM2///ORM1	orosomucoid 2///orosomucoid 1
223507_at	3.18e-05	2.26e-06	-4.8712	4.37843	-0.764974	CLPX	caseinolytic mitochondrial matrix peptidase chaperone subunit
224577_at	9.51e-05	8.62e-06	-4.56867	3.10912	-0.764867	ERGIC1	endoplasmic reticulum-golgi intermediate compartment 1
206706_at	6.24e-16	7.78e-19	-9.83238	32.1586	-0.76456	NTF3	neurotrophin 3
203897_at	0.000156	1.57e-05	-4.42789	2.5408	-0.764367	LYRM1	LYR motif containing 1
209841_s_at	4.11e-15	7.08e-18	-9.49967	30.0082	-0.764011	LRRN3	leucine rich repeat neuronal 3
244697_at	0.0313	0.0104	-2.58545	-3.45673	-0.763686
227052_at	0.000928	0.000138	-3.8886	0.50103	-0.763276	SMIM14	small integral membrane protein 14
226325_at	0.0478	0.0178	-2.39066	-3.92198	-0.763243	ADSSL1	adenylosuccinate synthase like 1
1569154_a_at	1.33e-07	3.25e-09	-6.19824	10.6556	-0.762979	GRAMD4	GRAM domain containing 4
203662_s_at	0.0128	0.00346	-2.95927	-2.46924	-0.762575	TMOD1	tropomodulin 1
218379_at	9.92e-05	9.1e-06	-4.55601	3.05744	-0.761529	RBM7	RNA binding motif protein 7
214241_at	0.000466	5.93e-05	-4.10404	1.28929	-0.760688	NDUFB8	NADH:ubiquinone oxidoreductase subunit B8
205012_s_at	0.00336	0.000668	-3.45713	-0.96685	-0.76043	HAGH	hydroxyacylglutathione hydrolase
1559550_s_at	1.15e-06	4.21e-08	-5.70366	8.18906	-0.760277
214462_at	0.000552	7.31e-05	-4.05122	1.0927	-0.75913	SOCS6	suppressor of cytokine signaling 6
203140_at	0.000846	0.000123	-3.91816	0.60706	-0.758702	BCL6	B-cell CLL/lymphoma 6
231274_s_at	0.00255	0.000476	-3.55296	-0.65388	-0.758571
203661_s_at	0.0127	0.00345	-2.95968	-2.4681	-0.758435	TMOD1	tropomodulin 1
200732_s_at	0.000185	1.94e-05	-4.37806	2.34315	-0.757272	PTP4A1	protein tyrosine phosphatase type IVA, member 1
1560342_at	0.0172	0.005	-2.83863	-2.80135	-0.756848
228490_at	0.00305	0.000592	-3.49144	-0.85569	-0.756322	ABHD2	abhydrolase domain containing 2
236439_at	0.016	0.00458	-2.8679	-2.72194	-0.75617	LOC106146153	uncharacterized lncRNA LOC106146153
239660_at	0.0393	0.0139	-2.48275	-3.7063	-0.755591	RALGAPA2	Ral GTPase activating protein catalytic alpha subunit 2
53720_at	0.000841	0.000122	-3.92005	0.61386	-0.754796	C19orf66	chromosome 19 open reading frame 66
213300_at	1.28e-07	3.08e-09	-6.20826	10.707	-0.754617	ATG2A	autophagy related 2A
242901_at	8.65e-06	4.63e-07	-5.21397	5.89284	-0.754161
209276_s_at	0.0159	0.00456	-2.86912	-2.71863	-0.754052	GLRX	glutaredoxin
243158_at	0.00391	0.000803	-3.40435	-1.13603	-0.753397
216902_s_at	0.00508	0.00111	-3.30999	-1.43266	-0.753297	RRN3P1///RRN3P2///RRN3	RRN3 homolog, RNA polymerase I transcription factor pseudogene 1///RRN3 homolog, RNA polymerase I transcription factor pseudogene 2///RRN3 homolog, RNA polymerase I transcription factor
210549_s_at	1.52e-17	1.26e-20	-10.4445	36.1761	-0.753175	CCL23	C-C motif chemokine ligand 23
204150_at	0.000256	2.87e-05	-4.28356	1.97332	-0.752868	STAB1	stabilin 1
230234_at	6.86e-08	1.47e-09	-6.34591	11.4189	-0.75236	FXN	frataxin
223178_s_at	0.00512	0.00112	-3.30716	-1.44143	-0.752195	NT5DC1	5'-nucleotidase domain containing 1
203243_s_at	0.00212	0.000379	-3.61669	-0.44155	-0.75198	PDLIM5	PDZ and LIM domain 5
202929_s_at	0.00828	0.00202	-3.12892	-1.98094	-0.751952	DDTL///DDT	D-dopachrome tautomerase-like///D-dopachrome tautomerase
227092_at	0.000246	2.73e-05	-4.2949	2.01733	-0.751519	LOC101927752	uncharacterized LOC101927752
222458_s_at	0.00483	0.00104	-3.32919	-1.3729	-0.751161	AKIRIN1	akirin 1
227574_at	0.00019	1.99e-05	-4.37127	2.31636	-0.751133	OBSL1	obscurin like 1
208209_s_at	0.0128	0.00346	-2.95896	-2.47012	-0.750833	C4BPB	complement component 4 binding protein beta
210553_x_at	0.00805	0.00195	-3.13999	-1.94822	-0.750529	LOC100507472///PCSK6	uncharacterized LOC100507472///proprotein convertase subtilisin/kexin type 6
221760_at	0.00861	0.00212	-3.11348	-2.0264	-0.75021	MAN1A1	mannosidase alpha class 1A member 1
214424_s_at	4.45e-05	3.42e-06	-4.77916	3.98541	-0.749965	ALDOB	aldolase, fructose-bisphosphate B
233764_s_at	2.08e-10	1.69e-12	-7.53586	17.9704	-0.749715	LARP1B	La ribonucleoprotein domain family member 1B
207220_at	0.0587	0.023	-2.29165	-4.1453	-0.749699	ART4	ADP-ribosyltransferase 4 (Dombrock blood group)
225853_at	9.54e-05	8.66e-06	-4.56756	3.10457	-0.74941	GNPNAT1	glucosamine-phosphate N-acetyltransferase 1
41387_r_at	1.19e-12	4.33e-15	-8.5071	23.7657	-0.749302	KDM6B	lysine demethylase 6B
224358_s_at	0.0106	0.00274	-3.03349	-2.25867	-0.748621	MS4A7	membrane spanning 4-domains A7
1556657_at	0.0002	2.13e-05	-4.35574	2.25519	-0.748031
1569452_at	3.51e-06	1.58e-07	-5.43768	6.92305	-0.747922	LOC692247	uncharacterized LOC692247
203803_at	0.00594	0.00134	-3.2531	-1.60792	-0.747606	PCYOX1	prenylcysteine oxidase 1
242263_at	0.00105	0.00016	-3.84811	0.35696	-0.747502	TMED5	transmembrane p24 trafficking protein 5
205719_s_at	0.0186	0.00552	-2.80599	-2.88904	-0.747362	LOC101929036///PAH	uncharacterized LOC101929036///phenylalanine hydroxylase
224802_at	0.00108	0.000165	-3.84012	0.32867	-0.747328	NDFIP2	Nedd4 family interacting protein 2
227425_at	0.00386	0.000791	-3.40862	-1.12241	-0.746804	REPS2	RALBP1 associated Eps domain containing 2
232000_at	0.00337	0.00067	-3.45606	-0.97031	-0.746059	TTC39B	tetratricopeptide repeat domain 39B
242317_at	0.00721	0.0017	-3.18144	-1.82477	-0.74604	HIGD1A	HIG1 hypoxia inducible domain family member 1A
204389_at	0.00934	0.00235	-3.08233	-2.11751	-0.745011	MAOA	monoamine oxidase A
227961_at	0.00269	0.000507	-3.53505	-0.71294	-0.744827	CTSB	cathepsin B
210558_at	0.161	0.0819	-1.74889	-5.20877	-0.744777	AKR1C4	aldo-keto reductase family 1, member C4
1570571_at	0.00449	0.000951	-3.35496	-1.29222	-0.744332	CCDC91	coiled-coil domain containing 91
1556713_at	0.0297	0.0098	-2.6081	-3.4004	-0.744203
1563610_at	0.00175	0.0003	-3.68083	-0.22455	-0.744188	LOC157273	uncharacterized LOC157273
242853_at	0.04	0.0142	-2.4743	-3.72641	-0.744026
205471_s_at	3.42e-06	1.53e-07	-5.44405	6.95284	-0.743841	DACH1	dachshund family transcription factor 1
214423_x_at	0.000261	2.94e-05	-4.27753	1.94993	-0.743473	ALDOB	aldolase, fructose-bisphosphate B
204948_s_at	0.0856	0.0368	-2.10188	-4.54826	-0.742893	FST	follistatin
206385_s_at	0.182	0.0964	-1.67063	-5.33936	-0.742813	ANK3	ankyrin 3, node of Ranvier (ankyrin G)
219753_at	0.000768	0.000109	-3.94897	0.71826	-0.742707	STAG3	stromal antigen 3
217685_at	6.01e-07	1.94e-08	-5.85594	8.93331	-0.742678
1561908_a_at	0.00418	0.000871	-3.38061	-1.21135	-0.742623	HS3ST3B1	heparan sulfate-glucosamine 3-sulfotransferase 3B1
221648_s_at	0.0101	0.0026	-3.05002	-2.21111	-0.741961	AGMAT	agmatinase
206701_x_at	0.00561	0.00125	-3.27405	-1.5437	-0.741956	EDNRB	endothelin receptor type B
1563357_at	0.0207	0.00627	-2.76291	-3.0033	-0.741886
1559154_at	0.00288	0.000551	-3.51162	-0.7898	-0.74149
233689_at	0.000338	4.02e-05	-4.20052	1.65389	-0.741084
208671_at	0.000533	6.99e-05	-4.06243	1.13421	-0.74092	SERINC1	serine incorporator 1
202236_s_at	0.0245	0.0077	-2.69228	-3.18711	-0.740611	SLC16A1	solute carrier family 16 member 1
1569477_at	0.0305	0.0101	-2.5965	-3.42932	-0.740301
243874_at	0.0192	0.00573	-2.79316	-2.92324	-0.739995
236488_s_at	0.00182	0.000314	-3.66821	-0.26752	-0.739533
224224_s_at	0.000341	4.06e-05	-4.19829	1.64535	-0.739453	PDE11A	phosphodiesterase 11A
225265_at	0.00802	0.00194	-3.14165	-1.94328	-0.739427	RBMS1	RNA binding motif single stranded interacting protein 1
203682_s_at	0.000455	5.75e-05	-4.11175	1.31817	-0.739317	IVD	isovaleryl-CoA dehydrogenase
205969_at	0.0631	0.0251	-2.25629	-4.22291	-0.739146	AADAC	arylacetamide deacetylase
226612_at	0.137	0.0668	-1.84287	-5.04432	-0.738962	UBE2QL1	ubiquitin conjugating enzyme E2 Q family like 1
236235_at	0.00588	0.00132	-3.25688	-1.59634	-0.738377	ITCH	itchy E3 ubiquitin protein ligase
228383_at	3.16e-09	4.03e-11	-6.99272	14.8963	-0.737921	PNPLA7	patatin like phospholipase domain containing 7
227223_at	0.0482	0.0179	-2.38718	-3.92998	-0.737867	RBM39	RNA binding motif protein 39
230259_at	0.00534	0.00118	-3.29188	-1.48874	-0.737209	FUOM	fucose mutarotase
210688_s_at	0.000169	1.73e-05	-4.40498	2.44972	-0.735971	CPT1A	carnitine palmitoyltransferase 1A
228758_at	0.000727	0.000102	-3.96608	0.78036	-0.735854	BCL6	B-cell CLL/lymphoma 6
202460_s_at	0.00269	0.000507	-3.53505	-0.71295	-0.735513	LPIN2	lipin 2
44790_s_at	0.00254	0.000473	-3.55478	-0.64784	-0.735467	KIAA0226L	KIAA0226 like
203586_s_at	0.00189	0.000329	-3.65541	-0.31097	-0.734723	ARL4D	ADP ribosylation factor like GTPase 4D
214702_at	0.0059	0.00133	-3.25531	-1.60115	-0.7346	FN1	fibronectin 1
239597_at	0.0591	0.0232	-2.28834	-4.15263	-0.73452
203708_at	0.0457	0.0168	-2.4124	-3.87175	-0.733873	PDE4B	phosphodiesterase 4B
239151_at	0.00457	0.000971	-3.34885	-1.31139	-0.733856	BMS1P5	BMS1, ribosome biogenesis factor pseudogene 5
209655_s_at	0.0714	0.0293	-2.19477	-4.35516	-0.733714	TMEM47	transmembrane protein 47
240322_at	1.08e-10	8.05e-13	-7.65971	18.6892	-0.733584
216629_at	1.45e-07	3.59e-09	-6.17922	10.5582	-0.733303	SRRM2	serine/arginine repetitive matrix 2
229770_at	0.0159	0.00455	-2.87011	-2.71592	-0.733268	GLT1D1	glycosyltransferase 1 domain containing 1
211631_x_at	4.99e-09	6.78e-11	-6.90138	14.3926	-0.733061	B4GALT1	beta-1,4-galactosyltransferase 1
1559975_at	2.05e-06	8.33e-08	-5.56747	7.53537	-0.732822	BTG1	BTG anti-proliferation factor 1
[truncated: 52,614 more rows]
