# Supplementary material for: Centromere protein N may be a novel malignant prognostic biomarker for hepatocellular carcinoma
Source: PeerJ. 2021 May 3;9:e11342. doi: 10.7717/peerj.11342 (PMC8101454; doi:10.7717/peerj.11342)
Supplement: File S5 [file peerj-09-11342-s015.xlsx]

## Sheet: the original data of PPI string
#node1	node2	node1_string_internal_id	node2_string_internal_id	node1_external_id	node2_external_id	neighborhood_on_chromosome	gene_fusion	phylogenetic_cooccurrence	homology	coexpression	experimentally_determined_interaction	database_annotated	automated_textmining	combined_score
CDCA8	CDC20	4444097	4443940	9606.ENSP00000362146	9606.ENSP00000361540	0	0	0	0	0.988	0	0.9	0.599	0.999
TPX2	AURKA	4437665	4432988	9606.ENSP00000300403	9606.ENSP00000216911	0	0	0	0	0.952	0.982	0.9	0.886	0.999
ASS1	OTC	4443929	4432619	9606.ENSP00000361471	9606.ENSP00000039007	0.294	0	0.299	0	0.851	0	0.9	0.936	0.999
MCM7	MCM6	4438312	4435383	9606.ENSP00000307288	9606.ENSP00000264156	0	0	0.251	0.784	0.997	0.998	0.9	0.935	0.999
MCM7	GINS2	4438312	4434310	9606.ENSP00000307288	9606.ENSP00000253462	0	0	0	0	0.79	0.957	0.9	0.659	0.999
LSM4	SNRPB	4450918	4448654	9606.ENSP00000469468	9606.ENSP00000412566	0	0	0	0	0.411	0.96	0.9	0.665	0.999
FOS	JUNB	4438204	4437951	9606.ENSP00000306245	9606.ENSP00000303315	0	0	0	0	0.824	0.884	0.9	0.852	0.999
MCM3	MCM4	4451546	4435007	9606.ENSP00000480987	9606.ENSP00000262105	0	0	0	0.719	0.997	0.977	0.9	0.934	0.999
NCAPD2	NCAPG	4439733	4434176	9606.ENSP00000325017	9606.ENSP00000251496	0	0	0	0	0.994	0.962	0.9	0.885	0.999
AURKB	CCNB2	4438898	4436767	9606.ENSP00000313950	9606.ENSP00000288207	0	0	0	0	0.962	0.291	0.9	0.677	0.999
CDC20	CCNB2	4443940	4436767	9606.ENSP00000361540	9606.ENSP00000288207	0	0	0	0	0.989	0.71	0.9	0.829	0.999
MCM2	MCM5	4435544	4432914	9606.ENSP00000265056	9606.ENSP00000216122	0	0	0	0.778	0.999	0.998	0.9	0.982	0.999
CDCA8	AURKB	4444097	4438898	9606.ENSP00000362146	9606.ENSP00000313950	0	0	0	0	0.97	0.379	0.9	0.967	0.999
PTTG1	CDC20	4446209	4443940	9606.ENSP00000377536	9606.ENSP00000361540	0	0	0	0	0.931	0.993	0.9	0.886	0.999
MCM4	MCM5	4435007	4432914	9606.ENSP00000262105	9606.ENSP00000216122	0	0	0	0.783	0.999	0.97	0.9	0.934	0.999
CDC20	AURKA	4443940	4432988	9606.ENSP00000361540	9606.ENSP00000216911	0	0	0	0	0.977	0.379	0.9	0.743	0.999
MCM6	MCM4	4435383	4435007	9606.ENSP00000264156	9606.ENSP00000262105	0	0	0	0.734	0.999	0.998	0.9	0.936	0.999
MCM3	MCM7	4451546	4438312	9606.ENSP00000480987	9606.ENSP00000307288	0	0	0.22	0.78	0.996	0.998	0.9	0.945	0.999
MCM2	MCM6	4435544	4435383	9606.ENSP00000265056	9606.ENSP00000264156	0	0	0.256	0.75	0.998	0.998	0.9	0.916	0.999
MCM6	MCM5	4435383	4432914	9606.ENSP00000264156	9606.ENSP00000216122	0	0	0.208	0.749	0.999	0.998	0.9	0.918	0.999
CDC20	CCNA2	4443940	4436109	9606.ENSP00000361540	9606.ENSP00000274026	0	0	0	0	0.984	0.994	0.9	0.847	0.999
CDC20	AURKB	4443940	4438898	9606.ENSP00000361540	9606.ENSP00000313950	0	0	0	0	0.972	0.379	0.9	0.791	0.999
KIF20A	AURKB	4446341	4438898	9606.ENSP00000378356	9606.ENSP00000313950	0	0	0	0	0.932	0.433	0.9	0.792	0.999
MCM4	GINS2	4435007	4434310	9606.ENSP00000262105	9606.ENSP00000253462	0	0	0	0	0.88	0.788	0.9	0.714	0.999
CCNB2	AURKA	4436767	4432988	9606.ENSP00000288207	9606.ENSP00000216911	0	0	0	0	0.973	0.896	0	0.696	0.999
MCM2	GINS2	4435544	4434310	9606.ENSP00000265056	9606.ENSP00000253462	0	0	0	0	0.928	0.735	0.9	0.664	0.999
MCM7	MCM5	4438312	4432914	9606.ENSP00000307288	9606.ENSP00000216122	0	0	0	0.774	0.999	0.977	0.9	0.986	0.999
MCM2	MCM4	4435544	4435007	9606.ENSP00000265056	9606.ENSP00000262105	0	0	0	0.75	0.999	0.998	0.9	0.921	0.999
GINS2	MCM5	4434310	4432914	9606.ENSP00000253462	9606.ENSP00000216122	0	0	0	0	0.932	0.767	0.9	0.647	0.999
MCM3	MCM5	4451546	4432914	9606.ENSP00000480987	9606.ENSP00000216122	0	0	0.263	0.746	0.997	0.985	0.9	0.959	0.999
RACGAP1	KIF20A	4448310	4446341	9606.ENSP00000404190	9606.ENSP00000378356	0	0	0	0	0.878	0.707	0.9	0.793	0.999
MCM3	MCM2	4451546	4435544	9606.ENSP00000480987	9606.ENSP00000265056	0	0	0	0.733	0.997	0.998	0.9	0.919	0.999
KIF2C	AURKB	4443901	4438898	9606.ENSP00000361298	9606.ENSP00000313950	0	0	0	0	0.913	0.125	0.9	0.915	0.999
CDC20	UBE2C	4443940	4441865	9606.ENSP00000361540	9606.ENSP00000348838	0	0	0	0	0.982	0.905	0.9	0.866	0.999
MCM7	MCM4	4438312	4435007	9606.ENSP00000307288	9606.ENSP00000262105	0	0	0	0.793	0.998	0.998	0.9	0.937	0.999
MCM3	MCM6	4451546	4435383	9606.ENSP00000480987	9606.ENSP00000264156	0	0	0.239	0.729	0.997	0.998	0.9	0.92	0.999
MCM7	MCM2	4438312	4435544	9606.ENSP00000307288	9606.ENSP00000265056	0	0	0	0.786	0.998	0.998	0.9	0.864	0.999
UBE2C	CCNA2	4441865	4436109	9606.ENSP00000348838	9606.ENSP00000274026	0	0	0	0	0.956	0.164	0.9	0.646	0.998
UBE2C	AURKA	4441865	4432988	9606.ENSP00000348838	9606.ENSP00000216911	0	0	0	0	0.949	0.064	0.9	0.639	0.998
CDC20	KIF2C	4443940	4443901	9606.ENSP00000361540	9606.ENSP00000361298	0	0	0	0	0.958	0.078	0.9	0.579	0.998
PLG	SERPINE1	4438461	4433266	9606.ENSP00000308938	9606.ENSP00000223095	0	0	0	0	0.063	0.435	0.9	0.978	0.998
MCM4	POLE2	4435007	4432952	9606.ENSP00000262105	9606.ENSP00000216367	0	0	0	0	0.942	0.172	0.9	0.659	0.998
TOP2A	TPX2	4448614	4437665	9606.ENSP00000411532	9606.ENSP00000300403	0	0	0	0	0.993	0	0	0.595	0.997
AURKB	NCAPG	4438898	4434176	9606.ENSP00000313950	9606.ENSP00000251496	0	0	0	0	0.959	0.263	0.9	0.379	0.997
C8B	C8A	4443704	4442465	9606.ENSP00000360281	9606.ENSP00000354458	0	0	0	0.836	0.779	0.87	0.9	0.922	0.997
PTTG1	AURKA	4446209	4432988	9606.ENSP00000377536	9606.ENSP00000216911	0	0	0	0	0.907	0.305	0.9	0.712	0.997
RACGAP1	AURKB	4448310	4438898	9606.ENSP00000404190	9606.ENSP00000313950	0	0	0	0	0.765	0.379	0.9	0.859	0.997
UBE2C	AURKB	4441865	4438898	9606.ENSP00000348838	9606.ENSP00000313950	0	0	0	0	0.934	0.064	0.9	0.597	0.997
CDCA8	CCNB2	4444097	4436767	9606.ENSP00000362146	9606.ENSP00000288207	0	0	0	0	0.938	0	0.9	0.578	0.997
MCM6	GINS2	4435383	4434310	9606.ENSP00000264156	9606.ENSP00000253462	0	0	0	0	0.813	0.756	0.9	0.547	0.997
CDCA8	KIF2C	4444097	4443901	9606.ENSP00000362146	9606.ENSP00000361298	0	0	0	0	0.931	0.114	0.9	0.658	0.997
PTTG1	UBE2C	4446209	4441865	9606.ENSP00000377536	9606.ENSP00000348838	0	0	0	0	0.936	0	0.9	0.694	0.997
HMMR	TPX2	4446202	4437665	9606.ENSP00000377492	9606.ENSP00000300403	0	0	0	0	0.837	0.379	0.9	0.751	0.997
KIF20A	CDCA8	4446341	4444097	9606.ENSP00000378356	9606.ENSP00000362146	0	0	0	0	0.92	0.116	0.9	0.571	0.996
FOS	EGR1	4438204	4433758	9606.ENSP00000306245	9606.ENSP00000239938	0	0	0	0	0.961	0.073	0	0.913	0.996
ACADM	ACAA2	4443625	4436619	9606.ENSP00000359871	9606.ENSP00000285093	0.055	0	0	0	0.85	0	0.9	0.794	0.996
FOXM1	CCNA2	4441245	4436109	9606.ENSP00000342307	9606.ENSP00000274026	0	0	0	0	0.863	0.082	0.9	0.751	0.996
MCM3	GINS2	4451546	4434310	9606.ENSP00000480987	9606.ENSP00000253462	0	0	0	0	0.779	0.735	0.9	0.543	0.996
RACGAP1	KIF4A	4448310	4444386	9606.ENSP00000404190	9606.ENSP00000363524	0	0	0	0	0.909	0.186	0.9	0.617	0.996
KIF2C	CCNB2	4443901	4436767	9606.ENSP00000361298	9606.ENSP00000288207	0	0	0	0	0.914	0.15	0.9	0.526	0.996
CPS1	ASS1	4448239	4443929	9606.ENSP00000402608	9606.ENSP00000361471	0.185	0.627	0	0	0.522	0.35	0.8	0.803	0.995
KIF20A	KIF4A	4446341	4444386	9606.ENSP00000378356	9606.ENSP00000363524	0	0	0	0.579	0.936	0.132	0.9	0.784	0.995
CENPF	CCNB2	4442771	4436767	9606.ENSP00000355922	9606.ENSP00000288207	0	0	0	0	0.901	0	0.9	0.544	0.995
MCM2	POLE2	4435544	4432952	9606.ENSP00000265056	9606.ENSP00000216367	0	0	0	0	0.874	0.172	0.9	0.59	0.995
CCNB2	NCAPG	4436767	4434176	9606.ENSP00000288207	9606.ENSP00000251496	0	0	0	0	0.937	0	0.9	0.398	0.995
KIF2C	CENPF	4443901	4442771	9606.ENSP00000361298	9606.ENSP00000355922	0	0	0	0	0.884	0	0.9	0.63	0.995
HMMR	AURKA	4446202	4432988	9606.ENSP00000377492	9606.ENSP00000216911	0	0	0	0	0.827	0.342	0.9	0.552	0.994
MCM3	POLE2	4451546	4432952	9606.ENSP00000480987	9606.ENSP00000216367	0	0	0	0	0.887	0.172	0.9	0.505	0.994
MBL2	FCN2	4444298	4436933	9606.ENSP00000363079	9606.ENSP00000291744	0	0	0	0	0.113	0.396	0.9	0.912	0.994
PTTG1	AURKB	4446209	4438898	9606.ENSP00000377536	9606.ENSP00000313950	0	0	0	0	0.834	0	0.9	0.688	0.994
KIF20A	PRC1	4446341	4446249	9606.ENSP00000378356	9606.ENSP00000377793	0	0	0	0	0.892	0.182	0.9	0.468	0.994
CDCA8	CENPF	4444097	4442771	9606.ENSP00000362146	9606.ENSP00000355922	0	0	0	0	0.89	0	0.9	0.537	0.994
TAT	HPD	4441813	4436793	9606.ENSP00000348234	9606.ENSP00000289004	0	0	0	0	0.681	0	0.9	0.837	0.994
CCNA2	MCM2	4436109	4435544	9606.ENSP00000274026	9606.ENSP00000265056	0	0	0	0	0.846	0.182	0.9	0.641	0.994
POLE2	MCM5	4432952	4432914	9606.ENSP00000216367	9606.ENSP00000216122	0	0	0	0	0.882	0.324	0.9	0.313	0.993
ADH1B	ALDH2	4438237	4434937	9606.ENSP00000306606	9606.ENSP00000261733	0.048	0	0	0	0.14	0	0.9	0.924	0.993
MCM7	POLE2	4438312	4432952	9606.ENSP00000307288	9606.ENSP00000216367	0	0	0	0	0.879	0.172	0.9	0.461	0.993
CDCA8	CDCA5	4444097	4436187	9606.ENSP00000362146	9606.ENSP00000275517	0	0	0	0	0.856	0	0.9	0.59	0.993
ASS1	ASNS	4443929	4432722	9606.ENSP00000361471	9606.ENSP00000175506	0.043	0	0	0	0.659	0.363	0.9	0.746	0.993
AURKB	AURKA	4438898	4432988	9606.ENSP00000313950	9606.ENSP00000216911	0	0	0.445	0.959	0.925	0.094	0.9	0.878	0.993
AURKB	CDCA5	4438898	4436187	9606.ENSP00000313950	9606.ENSP00000275517	0	0	0	0	0.785	0	0.9	0.711	0.993
KIF20A	KIF2C	4446341	4443901	9606.ENSP00000378356	9606.ENSP00000361298	0	0	0	0.578	0.915	0	0.9	0.609	0.993
UBE2C	CCNB2	4441865	4436767	9606.ENSP00000348838	9606.ENSP00000288207	0	0	0	0	0.976	0.164	0	0.696	0.993
ASPM	NCAPG	4442873	4434176	9606.ENSP00000356379	9606.ENSP00000251496	0	0	0	0	0.991	0	0	0.293	0.993
CDC20	CENPF	4443940	4442771	9606.ENSP00000361540	9606.ENSP00000355922	0	0	0	0	0.839	0	0.9	0.596	0.992
HJURP	OIP5	4448718	4433119	9606.ENSP00000414109	9606.ENSP00000220514	0	0	0	0	0.775	0.32	0.9	0.565	0.992
PROZ	SERPINA10	4441427	4434989	9606.ENSP00000344458	9606.ENSP00000261994	0	0	0	0	0.636	0.818	0	0.901	0.992
JUNB	FOSB	4437951	4433953	9606.ENSP00000303315	9606.ENSP00000245919	0	0	0	0	0.346	0.588	0.9	0.766	0.992
ATF5	PTP4A1	4447955	4443595	9606.ENSP00000396954	9606.ENSP00000359685	0	0	0	0	0.063	0	0.9	0.921	0.992
CENPN	CENPM	4446136	4432895	9606.ENSP00000377007	9606.ENSP00000215980	0	0	0	0	0.613	0.131	0.9	0.81	0.992
TOP2A	UBE2C	4448614	4441865	9606.ENSP00000411532	9606.ENSP00000348838	0	0	0	0	0.982	0.05	0	0.545	0.991
CCNA2	MCM4	4436109	4435007	9606.ENSP00000274026	9606.ENSP00000262105	0	0	0	0	0.797	0.182	0.9	0.551	0.991
KIF4A	KIF2C	4444386	4443901	9606.ENSP00000363524	9606.ENSP00000361298	0	0	0	0.666	0.889	0	0.9	0.75	0.991
CPS1	OTC	4448239	4432619	9606.ENSP00000402608	9606.ENSP00000039007	0	0.277	0	0	0.318	0.173	0.9	0.83	0.991
NUSAP1	CDC20	4450429	4443940	9606.ENSP00000453403	9606.ENSP00000361540	0	0	0	0	0.981	0	0	0.552	0.991
CDC20	TRIP13	4443940	4432699	9606.ENSP00000361540	9606.ENSP00000166345	0	0	0	0	0.898	0.853	0	0.485	0.991
FOXM1	CCNB2	4441245	4436767	9606.ENSP00000342307	9606.ENSP00000288207	0	0	0	0	0.819	0.082	0.9	0.527	0.991
CENPF	AURKB	4442771	4438898	9606.ENSP00000355922	9606.ENSP00000313950	0	0	0	0	0.803	0	0.9	0.606	0.991
NCAPD2	AURKB	4439733	4438898	9606.ENSP00000325017	9606.ENSP00000313950	0	0	0	0	0.79	0.279	0.9	0.492	0.991
FEN1	MCM6	4438133	4435383	9606.ENSP00000305480	9606.ENSP00000264156	0	0	0.209	0	0.983	0.053	0	0.4	0.991
OAT	ARG1	4443204	4441926	9606.ENSP00000357838	9606.ENSP00000349446	0.185	0.405	0	0	0.343	0.132	0.9	0.751	0.991
CENPF	FOXM1	4442771	4441245	9606.ENSP00000355922	9606.ENSP00000342307	0	0	0	0	0.82	0	0.9	0.572	0.991
ANXA2	PLG	4441580	4438461	9606.ENSP00000346032	9606.ENSP00000308938	0	0	0	0	0	0.388	0.9	0.855	0.99
AURKB	CCNA2	4438898	4436109	9606.ENSP00000313950	9606.ENSP00000274026	0	0	0	0	0.969	0.177	0	0.661	0.99
TDO2	IDO2	4450131	4450084	9606.ENSP00000444788	9606.ENSP00000443432	0	0	0	0	0.064	0	0.9	0.905	0.99
SNRPB	SF3B4	4448654	4435985	9606.ENSP00000412566	9606.ENSP00000271628	0	0	0	0	0.177	0.733	0.9	0.615	0.99
CCNB2	CDCA5	4436767	4436187	9606.ENSP00000288207	9606.ENSP00000275517	0	0	0	0	0.837	0	0.9	0.471	0.99
CDC20	CDCA5	4443940	4436187	9606.ENSP00000361540	9606.ENSP00000275517	0	0	0	0	0.838	0	0.9	0.454	0.99
RACGAP1	CDCA8	4448310	4444097	9606.ENSP00000404190	9606.ENSP00000362146	0	0	0	0	0.812	0	0.9	0.524	0.99
MCM7	CCNA2	4438312	4436109	9606.ENSP00000307288	9606.ENSP00000274026	0	0	0	0	0.719	0.182	0.9	0.654	0.99
MCM3	CCNA2	4451546	4436109	9606.ENSP00000480987	9606.ENSP00000274026	0	0	0	0	0.695	0.182	0.9	0.621	0.989
CCNA2	MCM5	4436109	4432914	9606.ENSP00000274026	9606.ENSP00000216122	0	0	0	0	0.749	0.182	0.9	0.541	0.989
NUSAP1	NCAPG	4450429	4434176	9606.ENSP00000453403	9606.ENSP00000251496	0	0	0	0	0.981	0	0	0.472	0.989
CCNA2	MCM6	4436109	4435383	9606.ENSP00000274026	9606.ENSP00000264156	0	0	0	0	0.718	0.306	0.9	0.548	0.989
RACGAP1	KIF2C	4448310	4443901	9606.ENSP00000404190	9606.ENSP00000361298	0	0	0	0	0.794	0.186	0.9	0.471	0.989
HJURP	CENPN	4448718	4446136	9606.ENSP00000414109	9606.ENSP00000377007	0	0	0	0	0.673	0	0.9	0.7	0.989
MCM6	POLE2	4435383	4432952	9606.ENSP00000264156	9606.ENSP00000216367	0	0	0	0	0.734	0.172	0.9	0.597	0.989
FEN1	MCM2	4438133	4435544	9606.ENSP00000305480	9606.ENSP00000265056	0	0	0	0	0.972	0.053	0	0.609	0.988
MBL2	FCN3	4444298	4435966	9606.ENSP00000363079	9606.ENSP00000270879	0	0	0	0	0	0.157	0.9	0.87	0.988
TOP2A	NCAPG	4448614	4434176	9606.ENSP00000411532	9606.ENSP00000251496	0	0	0	0	0.967	0.085	0	0.644	0.988
CCNB2	MCM2	4436767	4435544	9606.ENSP00000288207	9606.ENSP00000265056	0	0	0	0	0.865	0.803	0	0.592	0.988
CENPF	KNTC1	4442771	4440000	9606.ENSP00000355922	9606.ENSP00000328236	0	0	0	0	0.804	0	0.9	0.457	0.988
PRC1	KIF4A	4446249	4444386	9606.ENSP00000377793	9606.ENSP00000363524	0	0	0	0	0.937	0.472	0	0.664	0.988
NUSAP1	CCNA2	4450429	4436109	9606.ENSP00000453403	9606.ENSP00000274026	0	0	0	0	0.981	0	0	0.409	0.988
HJURP	CENPM	4448718	4432895	9606.ENSP00000414109	9606.ENSP00000215980	0	0	0	0	0.783	0	0.9	0.481	0.987
AADAT	KMO	4449239	4442693	9606.ENSP00000423190	9606.ENSP00000355517	0	0	0	0	0.063	0	0.9	0.876	0.987
CDC20	FOXM1	4443940	4441245	9606.ENSP00000361540	9606.ENSP00000342307	0	0	0	0	0.96	0.05	0	0.683	0.987
CENPN	CDC20	4446136	4443940	9606.ENSP00000377007	9606.ENSP00000361540	0	0	0	0	0.838	0	0.9	0.299	0.987
NEU1	CTSA	4444596	4443947	9606.ENSP00000364782	9606.ENSP00000361562	0	0	0	0	0.082	0.472	0.9	0.763	0.987
TOP2A	CCNB2	4448614	4436767	9606.ENSP00000411532	9606.ENSP00000288207	0	0	0	0	0.965	0.057	0	0.623	0.986
CDC20	CENPM	4443940	4432895	9606.ENSP00000361540	9606.ENSP00000215980	0	0	0	0	0.806	0	0.9	0.342	0.986
CCNA2	AURKA	4436109	4432988	9606.ENSP00000274026	9606.ENSP00000216911	0	0	0	0	0.964	0.177	0	0.582	0.986
CENPN	CCNB2	4446136	4436767	9606.ENSP00000377007	9606.ENSP00000288207	0	0	0	0	0.841	0	0.9	0.206	0.986
AURKB	TPX2	4438898	4437665	9606.ENSP00000313950	9606.ENSP00000300403	0	0	0	0	0.897	0.435	0	0.779	0.986
TOP2A	CDC20	4448614	4443940	9606.ENSP00000411532	9606.ENSP00000361540	0	0	0	0	0.968	0	0	0.579	0.986
CDCA8	AURKA	4444097	4432988	9606.ENSP00000362146	9606.ENSP00000216911	0	0	0	0	0.933	0	0.54	0.586	0.986
CENPN	CDCA8	4446136	4444097	9606.ENSP00000377007	9606.ENSP00000362146	0	0	0	0	0.822	0	0.9	0.3	0.986
TOP2A	KIF4A	4448614	4444386	9606.ENSP00000411532	9606.ENSP00000363524	0	0	0	0	0.973	0	0	0.468	0.985
PRC1	CDC20	4446249	4443940	9606.ENSP00000377793	9606.ENSP00000361540	0	0	0	0	0.967	0	0	0.56	0.985
CKAP5	AURKA	4449644	4432988	9606.ENSP00000432768	9606.ENSP00000216911	0	0	0	0	0.228	0.334	0.9	0.757	0.985
CCNB2	CENPM	4436767	4432895	9606.ENSP00000288207	9606.ENSP00000215980	0	0	0	0	0.797	0	0.9	0.329	0.985
CKAP5	KIF2C	4449644	4443901	9606.ENSP00000432768	9606.ENSP00000361298	0	0	0	0	0.211	0.263	0.9	0.775	0.985
RRAGC	RRAGD	4444074	4443314	9606.ENSP00000362092	9606.ENSP00000358423	0	0	0	0.976	0	0.86	0.9	0.862	0.985
CDCA8	CENPM	4444097	4432895	9606.ENSP00000362146	9606.ENSP00000215980	0	0	0	0	0.809	0.075	0.9	0.278	0.985
PRC1	TPX2	4446249	4437665	9606.ENSP00000377793	9606.ENSP00000300403	0	0	0	0	0.966	0	0	0.577	0.985
CENPN	AURKB	4446136	4438898	9606.ENSP00000377007	9606.ENSP00000313950	0	0	0	0	0.806	0	0.9	0.297	0.985
MCM3	FEN1	4451546	4438133	9606.ENSP00000480987	9606.ENSP00000305480	0	0	0	0	0.969	0.053	0	0.512	0.984
AURKB	CENPM	4438898	4432895	9606.ENSP00000313950	9606.ENSP00000215980	0	0	0	0	0.805	0	0.9	0.287	0.984
TOP2A	CCNA2	4448614	4436109	9606.ENSP00000411532	9606.ENSP00000274026	0	0	0	0	0.967	0.05	0	0.544	0.984
NUSAP1	TOP2A	4450429	4448614	9606.ENSP00000453403	9606.ENSP00000411532	0	0	0	0	0.966	0	0	0.562	0.984
TOP2A	KIF20A	4448614	4446341	9606.ENSP00000411532	9606.ENSP00000378356	0	0	0	0	0.972	0	0	0.454	0.984
ACAA2	ACADS	4436619	4433826	9606.ENSP00000285093	9606.ENSP00000242592	0.055	0	0	0	0.205	0	0.9	0.821	0.984
CDCA8	CCNA2	4444097	4436109	9606.ENSP00000362146	9606.ENSP00000274026	0	0	0	0	0.974	0	0	0.427	0.984
FEN1	MCM4	4438133	4435007	9606.ENSP00000305480	9606.ENSP00000262105	0	0	0	0	0.974	0.053	0	0.419	0.984
GOT1	GPT2	4443556	4441506	9606.ENSP00000359539	9606.ENSP00000345282	0	0	0	0	0.091	0.41	0.8	0.862	0.983
TOP2A	CENPF	4448614	4442771	9606.ENSP00000411532	9606.ENSP00000355922	0	0	0	0	0.963	0	0	0.566	0.983
CENPN	KIF2C	4446136	4443901	9606.ENSP00000377007	9606.ENSP00000361298	0	0	0	0	0.748	0	0.9	0.41	0.983
CDC20	ASPM	4443940	4442873	9606.ENSP00000361540	9606.ENSP00000356379	0	0	0	0	0.972	0.168	0	0.346	0.983
MYC	ESR1	4451407	4448358	9606.ENSP00000479618	9606.ENSP00000405330	0	0	0	0	0	0.442	0.9	0.721	0.983
ESR1	PPARGC1A	4448358	4435507	9606.ENSP00000405330	9606.ENSP00000264867	0	0	0	0	0	0.592	0.9	0.625	0.983
FOS	FOSB	4438204	4433953	9606.ENSP00000306245	9606.ENSP00000245919	0	0	0	0.866	0.899	0.139	0.8	0.947	0.983
CXCL12	CCL20	4446453	4442174	9606.ENSP00000379140	9606.ENSP00000351671	0	0	0	0	0	0.546	0.9	0.674	0.983
PLG	VWF	4438461	4434871	9606.ENSP00000308938	9606.ENSP00000261405	0	0	0	0	0	0	0.9	0.845	0.983
RACGAP1	PRC1	4448310	4446249	9606.ENSP00000404190	9606.ENSP00000377793	0	0	0	0	0.954	0.379	0	0.436	0.982
CENPN	OIP5	4446136	4433119	9606.ENSP00000377007	9606.ENSP00000220514	0	0	0	0	0.778	0	0.9	0.26	0.982
ADH1B	ADH1A	4438237	4432830	9606.ENSP00000306606	9606.ENSP00000209668	0	0	0.449	0.985	0.828	0	0.9	0.892	0.982
ESR1	FOS	4448358	4438204	9606.ENSP00000405330	9606.ENSP00000306245	0	0	0	0	0	0.475	0.9	0.688	0.982
CENPF	CDCA5	4442771	4436187	9606.ENSP00000355922	9606.ENSP00000275517	0	0	0	0	0.714	0.121	0.9	0.367	0.982
GNMT	DMGDH	4444029	4434417	9606.ENSP00000361894	9606.ENSP00000255189	0	0	0	0	0.127	0	0.9	0.807	0.981
FEN1	MCM5	4438133	4432914	9606.ENSP00000305480	9606.ENSP00000216122	0	0	0.255	0	0.961	0.053	0	0.411	0.981
CDC20	MCM5	4443940	4432914	9606.ENSP00000361540	9606.ENSP00000216122	0	0	0	0	0.96	0.127	0	0.503	0.981
ESR1	NCOR1	4448358	4435844	9606.ENSP00000405330	9606.ENSP00000268712	0	0	0	0	0	0.575	0.9	0.597	0.981
KIF4A	AURKB	4444386	4438898	9606.ENSP00000363524	9606.ENSP00000313950	0	0	0	0	0.889	0.125	0	0.823	0.981
NUSAP1	CDCA8	4450429	4444097	9606.ENSP00000453403	9606.ENSP00000362146	0	0	0	0	0.966	0	0	0.479	0.981
PRC1	NCAPG	4446249	4434176	9606.ENSP00000377793	9606.ENSP00000251496	0	0	0	0	0.969	0	0	0.403	0.981
ASPM	CCNA2	4442873	4436109	9606.ENSP00000356379	9606.ENSP00000274026	0	0	0	0	0.976	0.063	0	0.228	0.981
ACADM	EHHADH	4443625	4433550	9606.ENSP00000359871	9606.ENSP00000231887	0.048	0	0	0	0.123	0.085	0.9	0.786	0.98
CDA	TK1	4444499	4437779	9606.ENSP00000364212	9606.ENSP00000301634	0.292	0	0	0	0.061	0	0.9	0.742	0.98
NUSAP1	ASPM	4450429	4442873	9606.ENSP00000453403	9606.ENSP00000356379	0	0	0	0	0.975	0	0	0.22	0.98
CENPN	CENPF	4446136	4442771	9606.ENSP00000377007	9606.ENSP00000355922	0	0	0	0	0.681	0	0.9	0.445	0.98
ASPM	CENPF	4442873	4442771	9606.ENSP00000356379	9606.ENSP00000355922	0	0	0	0	0.962	0	0	0.495	0.98
CKAP5	TPX2	4449644	4437665	9606.ENSP00000432768	9606.ENSP00000300403	0	0	0	0	0.339	0	0.9	0.73	0.98
KIF4A	TPX2	4444386	4437665	9606.ENSP00000363524	9606.ENSP00000300403	0	0	0	0	0.96	0	0	0.53	0.98
KIF2C	AURKA	4443901	4432988	9606.ENSP00000361298	9606.ENSP00000216911	0	0	0	0	0.868	0.433	0	0.76	0.98
KIF20A	CDC20	4446341	4443940	9606.ENSP00000378356	9606.ENSP00000361540	0	0	0	0	0.958	0.078	0	0.52	0.979
KIF2C	CDCA5	4443901	4436187	9606.ENSP00000361298	9606.ENSP00000275517	0	0	0	0	0.67	0	0.9	0.416	0.979
KIF2C	CENPM	4443901	4432895	9606.ENSP00000361298	9606.ENSP00000215980	0	0	0	0	0.75	0	0.9	0.229	0.979
KIF20A	CCNB2	4446341	4436767	9606.ENSP00000378356	9606.ENSP00000288207	0	0	0	0	0.952	0.15	0	0.542	0.979
TOP2A	AURKB	4448614	4438898	9606.ENSP00000411532	9606.ENSP00000313950	0	0	0	0	0.941	0.261	0	0.565	0.979
CDC20	MELK	4443940	4437455	9606.ENSP00000361540	9606.ENSP00000298048	0	0	0	0	0.963	0.056	0	0.445	0.979
CXCL2	CCL20	4449392	4442174	9606.ENSP00000427279	9606.ENSP00000351671	0	0	0	0	0.248	0	0.9	0.749	0.979
CENPN	CDCA5	4446136	4436187	9606.ENSP00000377007	9606.ENSP00000275517	0	0	0	0	0.726	0	0.9	0.298	0.979
APOF	CETP	4446789	4432783	9606.ENSP00000381250	9606.ENSP00000200676	0	0	0	0	0	0	0.9	0.8	0.979
CDCA8	KNTC1	4444097	4440000	9606.ENSP00000362146	9606.ENSP00000328236	0	0	0	0	0.656	0	0.9	0.463	0.979
IGFALS	IGFBP3	4448841	4445494	9606.ENSP00000416683	9606.ENSP00000370473	0	0	0	0	0.061	0.379	0.9	0.679	0.978
UBE2T	UBE2C	4442849	4441865	9606.ENSP00000356243	9606.ENSP00000348838	0	0	0	0.815	0.733	0.168	0.9	0.629	0.978
VWF	SERPINE1	4434871	4433266	9606.ENSP00000261405	9606.ENSP00000223095	0	0	0	0	0	0	0.9	0.796	0.978
NUSAP1	CCNB2	4450429	4436767	9606.ENSP00000453403	9606.ENSP00000288207	0	0	0	0	0.956	0	0	0.534	0.978
VWF	THBS1	4434871	4434771	9606.ENSP00000261405	9606.ENSP00000260356	0	0	0	0	0.063	0	0.9	0.785	0.978
CYP2C19	CYP2C9	4443723	4434798	9606.ENSP00000360372	9606.ENSP00000260682	0	0	0.449	0.985	0.322	0.685	0.9	0.929	0.977
ACAA2	EHHADH	4436619	4433550	9606.ENSP00000285093	9606.ENSP00000231887	0.057	0.048	0	0	0.152	0.296	0.9	0.652	0.977
CCNB2	CCNA2	4436767	4436109	9606.ENSP00000288207	9606.ENSP00000274026	0	0	0	0.743	0.97	0.086	0	0.806	0.977
NUSAP1	PRC1	4450429	4446249	9606.ENSP00000453403	9606.ENSP00000377793	0	0	0	0	0.962	0	0	0.433	0.977
CPT2	ACADM	4443759	4443625	9606.ENSP00000360541	9606.ENSP00000359871	0	0	0	0	0.229	0	0.9	0.736	0.977
KIF2C	TPX2	4443901	4437665	9606.ENSP00000361298	9606.ENSP00000300403	0	0	0	0	0.942	0	0	0.632	0.977
KIF20A	TPX2	4446341	4437665	9606.ENSP00000378356	9606.ENSP00000300403	0	0	0	0	0.959	0	0	0.459	0.977
OIP5	CENPM	4433119	4432895	9606.ENSP00000220514	9606.ENSP00000215980	0	0	0	0	0.771	0	0.9	0	0.976
FEN1	POLE2	4438133	4432952	9606.ENSP00000305480	9606.ENSP00000216367	0	0	0	0	0.705	0	0.9	0.263	0.976
BHMT	DMGDH	4436127	4434417	9606.ENSP00000274353	9606.ENSP00000255189	0.053	0	0	0	0.177	0	0.9	0.735	0.976
CDCA8	UBE2C	4444097	4441865	9606.ENSP00000362146	9606.ENSP00000348838	0	0	0	0	0.961	0	0	0.423	0.976
TOP2A	AURKA	4448614	4432988	9606.ENSP00000411532	9606.ENSP00000216911	0	0	0	0	0.92	0.261	0	0.634	0.976
PRC1	ASPM	4446249	4442873	9606.ENSP00000377793	9606.ENSP00000356379	0	0	0	0	0.965	0.071	0	0.323	0.976
ARG1	OTC	4441926	4432619	9606.ENSP00000349446	9606.ENSP00000039007	0	0	0	0	0.084	0.157	0.9	0.732	0.976
CDC20	KNTC1	4443940	4440000	9606.ENSP00000361540	9606.ENSP00000328236	0	0	0	0	0.606	0	0.9	0.45	0.976
UBE2C	TPX2	4441865	4437665	9606.ENSP00000348838	9606.ENSP00000300403	0	0	0	0	0.95	0	0	0.554	0.976
IGFBP3	PLG	4445494	4438461	9606.ENSP00000370473	9606.ENSP00000308938	0	0	0	0	0	0.379	0.9	0.64	0.975
KIF20A	AURKA	4446341	4432988	9606.ENSP00000378356	9606.ENSP00000216911	0	0	0	0	0.94	0.125	0	0.546	0.974
CYP2E1	ADH1B	4449959	4438237	9606.ENSP00000440689	9606.ENSP00000306606	0.043	0	0	0	0.128	0	0.9	0.732	0.974
CYP2E1	ADH1C	4449959	4449347	9606.ENSP00000440689	9606.ENSP00000426083	0.043	0	0	0	0.128	0	0.9	0.73	0.974
ASPM	AURKB	4442873	4438898	9606.ENSP00000356379	9606.ENSP00000313950	0	0	0	0	0.955	0.08	0	0.419	0.974
CENPF	CENPM	4442771	4432895	9606.ENSP00000355922	9606.ENSP00000215980	0	0	0	0	0.575	0	0.9	0.446	0.974
PTTG1	CCNB2	4446209	4436767	9606.ENSP00000377536	9606.ENSP00000288207	0	0	0	0	0.936	0	0	0.613	0.974
KNTC1	AURKB	4440000	4438898	9606.ENSP00000328236	9606.ENSP00000313950	0	0	0	0	0.649	0	0.9	0.298	0.973
COLEC11	FCN3	4448620	4435966	9606.ENSP00000411770	9606.ENSP00000270879	0	0	0	0	0	0.157	0.9	0.71	0.973
ADH1C	ADH1B	4449347	4438237	9606.ENSP00000426083	9606.ENSP00000306606	0	0	0.449	0.986	0.179	0.692	0.9	0.921	0.973
CYP2E1	ALDH2	4449959	4434937	9606.ENSP00000440689	9606.ENSP00000261733	0	0	0	0	0.062	0.085	0.9	0.731	0.973
TOP2A	ASPM	4448614	4442873	9606.ENSP00000411532	9606.ENSP00000356379	0	0	0	0	0.967	0	0	0.234	0.973
NUSAP1	CENPF	4450429	4442771	9606.ENSP00000453403	9606.ENSP00000355922	0	0	0	0	0.95	0	0	0.49	0.973
STAB2	LYVE1	4445802	4434461	9606.ENSP00000373539	9606.ENSP00000256178	0	0	0	0	0.062	0	0.9	0.732	0.972
ACAT1	ACADS	4435651	4433826	9606.ENSP00000265838	9606.ENSP00000242592	0.055	0	0	0	0.438	0	0.9	0.548	0.972
NCAPD2	CCNB2	4439733	4436767	9606.ENSP00000325017	9606.ENSP00000288207	0	0	0	0	0.644	0	0.9	0.276	0.972
CYP1A2	NAT2	4441211	4436677	9606.ENSP00000342007	9606.ENSP00000286479	0	0	0	0	0.077	0	0.9	0.727	0.972
CKAP5	AURKB	4449644	4438898	9606.ENSP00000432768	9606.ENSP00000313950	0	0	0	0	0.155	0.05	0.9	0.702	0.972
KIF2C	KNTC1	4443901	4440000	9606.ENSP00000361298	9606.ENSP00000328236	0	0	0	0	0.643	0	0.9	0.304	0.972
PLG	THBS1	4438461	4434771	9606.ENSP00000308938	9606.ENSP00000260356	0	0	0	0	0	0.379	0.9	0.598	0.972
LCAT	CETP	4435353	4432783	9606.ENSP00000264005	9606.ENSP00000200676	0	0	0	0	0.061	0	0.72	0.902	0.972
HAO1	CAT	4445115	4433793	9606.ENSP00000368066	9606.ENSP00000241052	0	0	0	0	0.115	0	0.9	0.717	0.972
CEBPA	FOS	4449403	4438204	9606.ENSP00000427514	9606.ENSP00000306245	0	0	0	0	0.115	0.467	0.9	0.458	0.971
FAM83D	HMMR	4451564	4446202	9606.ENSP00000481110	9606.ENSP00000377492	0	0	0	0	0.558	0.822	0	0.671	0.971
CXCL2	CXCL12	4449392	4446453	9606.ENSP00000427279	9606.ENSP00000379140	0	0	0	0	0	0.224	0.9	0.668	0.971
FTCD	AMDHD1	4436927	4435729	9606.ENSP00000291670	9606.ENSP00000266736	0	0	0.326	0	0.101	0	0.9	0.592	0.971
KNTC1	CCNB2	4440000	4436767	9606.ENSP00000328236	9606.ENSP00000288207	0	0	0	0	0.547	0.186	0.9	0.288	0.97
CYP3A4	CYP2C9	4440831	4434798	9606.ENSP00000337915	9606.ENSP00000260682	0	0	0.444	0.648	0.247	0.379	0.9	0.933	0.97
COL1A1	PCOLCE	4433346	4433264	9606.ENSP00000225964	9606.ENSP00000223061	0	0	0	0	0.54	0	0.9	0.4	0.97
GHR	SOCS2	4451768	4451575	9606.ENSP00000483403	9606.ENSP00000481249	0	0	0	0	0	0.405	0.9	0.542	0.97
KIF4A	ASPM	4444386	4442873	9606.ENSP00000363524	9606.ENSP00000356379	0	0	0	0	0.945	0.086	0	0.458	0.97
NUSAP1	UBE2C	4450429	4441865	9606.ENSP00000453403	9606.ENSP00000348838	0	0	0	0	0.935	0	0	0.557	0.97
VWF	F9	4434871	4433043	9606.ENSP00000261405	9606.ENSP00000218099	0	0	0	0	0.054	0	0.9	0.709	0.97
LPA	LCAT	4439432	4435353	9606.ENSP00000321334	9606.ENSP00000264005	0	0	0	0	0.069	0	0.72	0.892	0.969
COL4A1	COL1A1	4444632	4433346	9606.ENSP00000364979	9606.ENSP00000225964	0	0	0.407	0.706	0.575	0	0.9	0.758	0.969
THBS1	SERPINE1	4434771	4433266	9606.ENSP00000260356	9606.ENSP00000223095	0	0	0	0	0.273	0	0.9	0.616	0.969
CDCA8	ASPM	4444097	4442873	9606.ENSP00000362146	9606.ENSP00000356379	0	0	0	0	0.966	0	0	0.12	0.969
CCNA2	NCAPG	4436109	4434176	9606.ENSP00000274026	9606.ENSP00000251496	0	0	0	0	0.958	0	0	0.293	0.969
CFI	CFHR3	4446295	4442880	9606.ENSP00000378130	9606.ENSP00000356395	0	0	0	0	0	0	0.9	0.709	0.969
MELK	CCNB2	4437455	4436767	9606.ENSP00000298048	9606.ENSP00000288207	0	0	0	0	0.919	0.262	0	0.51	0.968
ASPM	TPX2	4442873	4437665	9606.ENSP00000356379	9606.ENSP00000300403	0	0	0	0	0.966	0	0	0.096	0.968
KIF20A	CCNA2	4446341	4436109	9606.ENSP00000378356	9606.ENSP00000274026	0	0	0	0	0.938	0.15	0	0.445	0.968
NUSAP1	TPX2	4450429	4437665	9606.ENSP00000453403	9606.ENSP00000300403	0	0	0	0	0.913	0	0	0.647	0.968
LSM4	SF3B4	4450918	4435985	9606.ENSP00000469468	9606.ENSP00000271628	0	0	0	0	0.131	0.651	0.9	0.08	0.968
FBP1	ALDOB	4448472	4444463	9606.ENSP00000408025	9606.ENSP00000363988	0	0	0	0	0.181	0	0.9	0.634	0.967
ACAT1	EHHADH	4435651	4433550	9606.ENSP00000265838	9606.ENSP00000231887	0.057	0.025	0	0	0.129	0.296	0.9	0.517	0.967
COLEC10	FCN2	4440388	4436933	9606.ENSP00000332723	9606.ENSP00000291744	0	0	0	0	0.062	0.157	0.9	0.64	0.967
KNTC1	CDCA5	4440000	4436187	9606.ENSP00000328236	9606.ENSP00000275517	0	0	0	0	0.581	0	0.9	0.288	0.967
FMO3	CYP3A4	4442952	4440831	9606.ENSP00000356729	9606.ENSP00000337915	0.043	0	0	0	0.077	0.186	0.9	0.617	0.967
CTSA	GLA	4443947	4433054	9606.ENSP00000361562	9606.ENSP00000218516	0	0	0	0	0.067	0	0.9	0.679	0.967
SRD5A2	AKR1C3	4451219	4445414	9606.ENSP00000477587	9606.ENSP00000369927	0	0	0	0	0.051	0	0.9	0.685	0.967
EPHX2	CYP2J2	4449539	4443694	9606.ENSP00000430269	9606.ENSP00000360247	0.056	0	0	0	0.078	0.081	0.9	0.657	0.967
CDC20	MCM7	4443940	4438312	9606.ENSP00000361540	9606.ENSP00000307288	0	0	0	0	0.917	0.127	0	0.577	0.966
KIF20A	NCAPG	4446341	4434176	9606.ENSP00000378356	9606.ENSP00000251496	0	0	0	0	0.948	0.064	0	0.37	0.966
COL1A1	DCN	4433346	4432629	9606.ENSP00000225964	9606.ENSP00000052754	0	0	0	0	0.868	0.405	0	0.61	0.966
TUBG1	AURKA	4434173	4432988	9606.ENSP00000251413	9606.ENSP00000216911	0	0	0	0	0.254	0.32	0.9	0.416	0.966
NR1I3	CYP1A2	4442999	4441211	9606.ENSP00000356959	9606.ENSP00000342007	0	0	0	0	0.076	0.085	0.9	0.646	0.966
CYP2E1	NAT2	4449959	4436677	9606.ENSP00000440689	9606.ENSP00000286479	0	0	0	0	0.056	0	0.9	0.673	0.966
F11	F9	4447185	4433043	9606.ENSP00000384957	9606.ENSP00000218099	0	0	0.392	0.699	0.522	0	0.9	0.792	0.966
HAO2	EHHADH	4451782	4433550	9606.ENSP00000483507	9606.ENSP00000231887	0.07	0	0	0	0.064	0	0.9	0.648	0.965
KIF20A	UBE2C	4446341	4441865	9606.ENSP00000378356	9606.ENSP00000348838	0	0	0	0	0.937	0.084	0	0.453	0.965
TPX2	MELK	4437665	4437455	9606.ENSP00000300403	9606.ENSP00000298048	0	0	0	0	0.943	0	0	0.422	0.965
CDC20	MCM2	4443940	4435544	9606.ENSP00000361540	9606.ENSP00000265056	0	0	0	0	0.918	0.127	0	0.559	0.965
KIF4A	CCNB2	4444386	4436767	9606.ENSP00000363524	9606.ENSP00000288207	0	0	0	0	0.924	0.15	0	0.504	0.965
NUSAP1	KIF20A	4450429	4446341	9606.ENSP00000453403	9606.ENSP00000378356	0	0	0	0	0.94	0	0	0.448	0.965
CDC20	NCAPG	4443940	4434176	9606.ENSP00000361540	9606.ENSP00000251496	0	0	0	0	0.94	0.05	0	0.438	0.965
CYP2E1	PTGS2	4449959	4442894	9606.ENSP00000440689	9606.ENSP00000356438	0	0	0	0	0.055	0	0.9	0.658	0.964
TOP2A	MELK	4448614	4437455	9606.ENSP00000411532	9606.ENSP00000298048	0	0	0	0	0.935	0	0	0.474	0.964
CDKN3	CCNA2	4440665	4436109	9606.ENSP00000335357	9606.ENSP00000274026	0	0	0	0	0.887	0.112	0	0.672	0.964
ACAA2	ACAT1	4436619	4435651	9606.ENSP00000285093	9606.ENSP00000265838	0	0	0.448	0.87	0.187	0.512	0.9	0.93	0.964
KIF2C	CCNA2	4443901	4436109	9606.ENSP00000361298	9606.ENSP00000274026	0	0	0	0	0.932	0.15	0	0.43	0.964
NUSAP1	AURKA	4450429	4432988	9606.ENSP00000453403	9606.ENSP00000216911	0	0	0	0	0.94	0	0	0.403	0.963
TPX2	NCAPG	4437665	4434176	9606.ENSP00000300403	9606.ENSP00000251496	0	0	0	0	0.942	0	0	0.389	0.963
ETS2	FOS	4442345	4438204	9606.ENSP00000353344	9606.ENSP00000306245	0	0	0	0	0.063	0.294	0.9	0.511	0.963
KIF4A	CDC20	4444386	4443940	9606.ENSP00000363524	9606.ENSP00000361540	0	0	0	0	0.937	0.078	0	0.417	0.963
CAT	EHHADH	4433793	4433550	9606.ENSP00000241052	9606.ENSP00000231887	0	0	0	0	0.087	0.379	0.9	0.434	0.963
PCK1	PPARGC1A	4439313	4435507	9606.ENSP00000319814	9606.ENSP00000264867	0	0	0	0	0.078	0	0.9	0.621	0.962
CKAP5	TUBG1	4449644	4434173	9606.ENSP00000432768	9606.ENSP00000251413	0	0	0	0	0.163	0.292	0.9	0.437	0.962
NUSAP1	AURKB	4450429	4438898	9606.ENSP00000453403	9606.ENSP00000313950	0	0	0	0	0.933	0	0	0.455	0.962
FOXM1	MELK	4441245	4437455	9606.ENSP00000342307	9606.ENSP00000298048	0	0	0	0	0.816	0.112	0	0.789	0.962
TOP2A	KIF2C	4448614	4443901	9606.ENSP00000411532	9606.ENSP00000361298	0	0	0	0	0.94	0	0	0.385	0.962
CYP2E1	ADH1A	4449959	4432830	9606.ENSP00000440689	9606.ENSP00000209668	0.043	0	0	0	0.149	0	0.9	0.589	0.962
C7	CFP	4439494	4434012	9606.ENSP00000322061	9606.ENSP00000247153	0	0	0	0	0	0	0.9	0.641	0.962
FOXO1	SFN	4445233	4441103	9606.ENSP00000368880	9606.ENSP00000340989	0	0	0	0	0	0.369	0.9	0.45	0.962
KIF4A	AURKA	4444386	4432988	9606.ENSP00000363524	9606.ENSP00000216911	0	0	0	0	0.921	0.125	0	0.498	0.962
COLEC10	FCN3	4440388	4435966	9606.ENSP00000332723	9606.ENSP00000270879	0	0	0	0	0.061	0.157	0.9	0.581	0.962
CDCA5	CENPM	4436187	4432895	9606.ENSP00000275517	9606.ENSP00000215980	0	0	0	0	0.462	0	0.9	0.349	0.961
CENPN	KNTC1	4446136	4440000	9606.ENSP00000377007	9606.ENSP00000328236	0	0	0	0	0.52	0	0.9	0.269	0.961
PTTG1	CCNA2	4446209	4436109	9606.ENSP00000377536	9606.ENSP00000274026	0	0	0	0	0.896	0	0	0.641	0.961
TPX2	CCNB2	4437665	4436767	9606.ENSP00000300403	9606.ENSP00000288207	0	0	0	0	0.935	0	0	0.426	0.961
CTH	BHMT	4443637	4436127	9606.ENSP00000359976	9606.ENSP00000274353	0.184	0	0	0	0.08	0	0.8	0.771	0.961
CDCA8	TPX2	4444097	4437665	9606.ENSP00000362146	9606.ENSP00000300403	0	0	0	0	0.926	0	0	0.49	0.961
NUSAP1	OIP5	4450429	4433119	9606.ENSP00000453403	9606.ENSP00000220514	0	0	0	0	0.871	0	0	0.708	0.961
CDC20	MCM6	4443940	4435383	9606.ENSP00000361540	9606.ENSP00000264156	0	0	0	0	0.907	0.127	0	0.568	0.961
FBP1	TKT	4448472	4447693	9606.ENSP00000408025	9606.ENSP00000391481	0.135	0	0	0	0.064	0	0.9	0.577	0.961
GINS2	POLE2	4434310	4432952	9606.ENSP00000253462	9606.ENSP00000216367	0	0	0	0	0.805	0.16	0	0.778	0.96
FOS	DUSP1	4438204	4433734	9606.ENSP00000306245	9606.ENSP00000239223	0	0	0	0	0.873	0.111	0	0.674	0.96
C8A	C9	4442465	4435259	9606.ENSP00000354458	9606.ENSP00000263408	0	0	0	0.781	0.341	0.379	0.9	0.576	0.96
ALDH6A1	ACADM	4450308	4443625	9606.ENSP00000450436	9606.ENSP00000359871	0	0	0	0	0.148	0	0.9	0.567	0.96
MELK	CCNA2	4437455	4436109	9606.ENSP00000298048	9606.ENSP00000274026	0	0	0	0	0.93	0.186	0	0.36	0.96
KIF20A	CENPF	4446341	4442771	9606.ENSP00000378356	9606.ENSP00000355922	0	0	0	0	0.927	0	0	0.477	0.96
ACADS	EHHADH	4433826	4433550	9606.ENSP00000242592	9606.ENSP00000231887	0.048	0	0	0	0.123	0.085	0.9	0.567	0.96
HAO1	EHHADH	4445115	4433550	9606.ENSP00000368066	9606.ENSP00000231887	0.07	0	0	0	0.077	0	0.9	0.592	0.96
CSAD	CDO1	4435740	4434136	9606.ENSP00000267085	9606.ENSP00000250535	0	0	0	0	0.062	0	0.9	0.611	0.96
LPA	CETP	4439432	4432783	9606.ENSP00000321334	9606.ENSP00000200676	0	0	0	0	0.083	0	0.72	0.86	0.96
TOP2A	CDCA8	4448614	4444097	9606.ENSP00000411532	9606.ENSP00000362146	0	0	0	0	0.935	0	0	0.41	0.96
ALDH6A1	ABAT	4450308	4446571	9606.ENSP00000450436	9606.ENSP00000379845	0	0	0	0	0.187	0	0.9	0.543	0.959
ALDH2	CAT	4434937	4433793	9606.ENSP00000261733	9606.ENSP00000241052	0	0	0	0	0.124	0.05	0.9	0.574	0.959
LDLR	LIPC	4450447	4437532	9606.ENSP00000454071	9606.ENSP00000299022	0	0	0	0	0	0	0.9	0.615	0.959
SRD5A2	HSD17B6	4451219	4450358	9606.ENSP00000477587	9606.ENSP00000451406	0	0	0	0	0.08	0	0.9	0.595	0.959
CDC20	MCM4	4443940	4435007	9606.ENSP00000361540	9606.ENSP00000262105	0	0	0	0	0.915	0.127	0	0.5	0.959
PRC1	CCNB2	4446249	4436767	9606.ENSP00000377793	9606.ENSP00000288207	0	0	0	0	0.9	0.191	0	0.542	0.959
ASPM	AURKA	4442873	4432988	9606.ENSP00000356379	9606.ENSP00000216911	0	0	0	0	0.898	0.272	0	0.484	0.958
ACADM	ACAT1	4443625	4435651	9606.ENSP00000359871	9606.ENSP00000265838	0.055	0	0	0	0.422	0	0.9	0.326	0.958
CYP2E1	ADH4	4449959	4435613	9606.ENSP00000440689	9606.ENSP00000265512	0.043	0	0	0	0.064	0	0.9	0.588	0.958
RACGAP1	CCNB2	4448310	4436767	9606.ENSP00000404190	9606.ENSP00000288207	0	0	0	0	0.934	0.085	0	0.369	0.958
RACGAP1	RHOB	4448310	4436010	9606.ENSP00000404190	9606.ENSP00000272233	0	0	0	0	0	0.185	0.9	0.53	0.958
ESR1	HSPB1	4448358	4434059	9606.ENSP00000405330	9606.ENSP00000248553	0	0	0	0	0	0.336	0.9	0.414	0.957
KIF4A	CCNA2	4444386	4436109	9606.ENSP00000363524	9606.ENSP00000274026	0	0	0	0	0.924	0.15	0	0.389	0.957
CDC20	TPX2	4443940	4437665	9606.ENSP00000361540	9606.ENSP00000300403	0	0	0	0	0.922	0	0	0.473	0.957
C8A	C6	4442465	4435261	9606.ENSP00000354458	9606.ENSP00000263413	0	0	0	0.812	0.57	0	0.9	0.281	0.957
CYP2E1	NR1I3	4449959	4442999	9606.ENSP00000440689	9606.ENSP00000356959	0	0	0	0	0.063	0.085	0.9	0.562	0.957
TPX2	CCNA2	4437665	4436109	9606.ENSP00000300403	9606.ENSP00000274026	0	0	0	0	0.927	0	0	0.417	0.956
OAT	OTC	4443204	4432619	9606.ENSP00000357838	9606.ENSP00000039007	0.295	0.59	0	0	0.276	0	0	0.815	0.956
C8B	C9	4443704	4435259	9606.ENSP00000360281	9606.ENSP00000263408	0	0	0	0.739	0.53	0	0.9	0.483	0.956
GINS2	NCAPG	4434310	4434176	9606.ENSP00000253462	9606.ENSP00000251496	0	0	0	0	0.93	0	0	0.394	0.956
CENPF	NCAPG	4442771	4434176	9606.ENSP00000355922	9606.ENSP00000251496	0	0	0	0	0.922	0	0	0.446	0.955
FOXM1	AURKA	4441245	4432988	9606.ENSP00000342307	9606.ENSP00000216911	0	0	0	0	0.818	0	0	0.764	0.955
MCM7	FEN1	4438312	4438133	9606.ENSP00000307288	9606.ENSP00000305480	0	0	0	0	0.911	0.053	0	0.51	0.955
KIF2C	UBE2C	4443901	4441865	9606.ENSP00000361298	9606.ENSP00000348838	0	0	0	0	0.919	0.084	0	0.443	0.955
CYP2A6	NAT2	4437722	4436677	9606.ENSP00000301141	9606.ENSP00000286479	0	0	0	0	0.063	0	0.9	0.56	0.955
FEN1	RNASEH2A	4438133	4433165	9606.ENSP00000305480	9606.ENSP00000221486	0.135	0	0	0	0.784	0.266	0	0.714	0.955
CKAP5	CCNB2	4449644	4436767	9606.ENSP00000432768	9606.ENSP00000288207	0	0	0	0	0.183	0.358	0.9	0.257	0.955
PRC1	AURKA	4446249	4432988	9606.ENSP00000377793	9606.ENSP00000216911	0	0	0	0	0.927	0.055	0	0.402	0.955
SRD5A2	HSD17B2	4451219	4432776	9606.ENSP00000477587	9606.ENSP00000199936	0	0	0	0	0.062	0	0.9	0.551	0.954
HMMR	LYVE1	4446202	4434461	9606.ENSP00000377492	9606.ENSP00000256178	0	0	0	0	0	0	0.9	0.563	0.954
AOX1	CYP2A6	4444440	4437722	9606.ENSP00000363832	9606.ENSP00000301141	0	0	0	0	0.064	0	0.9	0.554	0.954
NNMT	AOX1	4449990	4444440	9606.ENSP00000441434	9606.ENSP00000363832	0	0	0	0	0.175	0	0.9	0.49	0.954
FMO3	CYP2C9	4442952	4434798	9606.ENSP00000356729	9606.ENSP00000260682	0.043	0	0	0	0.062	0.127	0.9	0.505	0.954
PRC1	CCNA2	4446249	4436109	9606.ENSP00000377793	9606.ENSP00000274026	0	0	0	0	0.928	0.341	0	0.122	0.954
ESR1	ATAD2	4448358	4436722	9606.ENSP00000405330	9606.ENSP00000287394	0	0	0	0	0	0.387	0.9	0.313	0.954
STMN1	AURKB	4448554	4438898	9606.ENSP00000410452	9606.ENSP00000313950	0	0	0	0	0.243	0	0.9	0.452	0.954
HJURP	CCNA2	4448718	4436109	9606.ENSP00000414109	9606.ENSP00000274026	0	0	0	0	0.904	0	0	0.537	0.953
ALPL	THY1	4444459	4436571	9606.ENSP00000363973	9606.ENSP00000284240	0	0	0	0	0.1	0	0.9	0.527	0.953
ANGPTL4	PPARGC1A	4437761	4435507	9606.ENSP00000301455	9606.ENSP00000264867	0	0	0	0	0	0	0.9	0.557	0.953
CDCA8	NCAPG	4444097	4434176	9606.ENSP00000362146	9606.ENSP00000251496	0	0	0	0	0.932	0	0	0.348	0.953
UBE2C	BARD1	4441865	4434809	9606.ENSP00000348838	9606.ENSP00000260947	0	0	0	0	0.201	0.191	0.9	0.359	0.953
MELK	NCAPG	4437455	4434176	9606.ENSP00000298048	9606.ENSP00000251496	0	0	0	0	0.925	0	0	0.4	0.953
PTTG1	CDCA8	4446209	4444097	9606.ENSP00000377536	9606.ENSP00000362146	0	0	0	0	0.905	0	0	0.534	0.953
RDH16	CYP26A1	4446780	4433297	9606.ENSP00000381206	9606.ENSP00000224356	0	0	0	0	0.053	0.082	0.9	0.524	0.953
NUSAP1	KIF2C	4450429	4443901	9606.ENSP00000453403	9606.ENSP00000361298	0	0	0	0	0.905	0	0	0.516	0.952
CYP1A2	CYP3A4	4441211	4440831	9606.ENSP00000342007	9606.ENSP00000337915	0	0	0.442	0.604	0.139	0	0.9	0.935	0.952
ALDH6A1	ALDH2	4450308	4434937	9606.ENSP00000450436	9606.ENSP00000261733	0	0	0.344	0.741	0.19	0.295	0.9	0.652	0.952
KIF20A	ASPM	4446341	4442873	9606.ENSP00000378356	9606.ENSP00000356379	0	0	0	0	0.914	0.086	0	0.43	0.951
EPHX2	CYP2C9	4449539	4434798	9606.ENSP00000430269	9606.ENSP00000260682	0.056	0	0	0	0.051	0.081	0.9	0.5	0.951
CYP2E1	ALDH3A1	4449959	4448623	9606.ENSP00000440689	9606.ENSP00000411821	0	0	0	0	0	0.085	0.9	0.511	0.951
CYP2C19	CYP3A4	4443723	4440831	9606.ENSP00000360372	9606.ENSP00000337915	0	0	0.444	0.638	0.178	0	0.9	0.931	0.951
NNMT	FHL2	4449990	4447410	9606.ENSP00000441434	9606.ENSP00000386665	0	0	0	0	0.951	0	0	0	0.951
TXNRD1	CTH	4449713	4443637	9606.ENSP00000434516	9606.ENSP00000359976	0.076	0	0	0	0.063	0	0.9	0.506	0.951
CYP2C9	CYP4F2	4434798	4433177	9606.ENSP00000260682	9606.ENSP00000221700	0	0	0.446	0.59	0.107	0	0.9	0.865	0.95
AOX1	CYP2B6	4444440	4439703	9606.ENSP00000363832	9606.ENSP00000324648	0	0	0	0	0.064	0	0.9	0.518	0.95
HMMR	ASPM	4446202	4442873	9606.ENSP00000377492	9606.ENSP00000356379	0	0	0	0	0.931	0	0	0.297	0.95
MCM3	CDC20	4451546	4443940	9606.ENSP00000480987	9606.ENSP00000361540	0	0	0	0	0.886	0.127	0	0.54	0.95
KIF4A	MELK	4444386	4437455	9606.ENSP00000363524	9606.ENSP00000298048	0	0	0	0	0.926	0	0	0.356	0.95
GADD45G	GADD45B	4434230	4432865	9606.ENSP00000252506	9606.ENSP00000215631	0	0	0	0.947	0.221	0.379	0.9	0.763	0.949
CENPF	CCNA2	4442771	4436109	9606.ENSP00000355922	9606.ENSP00000274026	0	0	0	0	0.908	0	0	0.473	0.949
CYP3A4	CYP2A6	4440831	4437722	9606.ENSP00000337915	9606.ENSP00000301141	0	0	0.44	0.633	0.14	0	0.9	0.904	0.949
COL1A1	PLOD3	4433346	4433268	9606.ENSP00000225964	9606.ENSP00000223127	0	0	0	0	0.095	0.17	0.9	0.408	0.949
ASPM	MELK	4442873	4437455	9606.ENSP00000356379	9606.ENSP00000298048	0	0	0	0	0.923	0.064	0	0.346	0.949
TDO2	KMO	4450131	4442693	9606.ENSP00000444788	9606.ENSP00000355517	0.18	0	0	0	0.115	0	0	0.935	0.949
TKT	ALDOB	4447693	4444463	9606.ENSP00000391481	9606.ENSP00000363988	0.11	0	0	0	0.064	0	0.9	0.469	0.949
NCAPG	AURKA	4434176	4432988	9606.ENSP00000251496	9606.ENSP00000216911	0	0	0	0	0.898	0.263	0	0.372	0.949
EPHX2	CYP2C8	4449539	4443714	9606.ENSP00000430269	9606.ENSP00000360317	0.056	0	0	0	0.051	0.081	0.9	0.481	0.949
KIF20A	PTTG1	4446341	4446209	9606.ENSP00000378356	9606.ENSP00000377536	0	0	0	0	0.917	0	0	0.404	0.948
CYP3A4	CYP2B6	4440831	4439703	9606.ENSP00000337915	9606.ENSP00000324648	0	0	0.445	0.637	0.117	0	0.9	0.927	0.948
SLC27A2	EHHADH	4435783	4433550	9606.ENSP00000267842	9606.ENSP00000231887	0	0	0	0	0.08	0	0.9	0.486	0.948
ASPM	NCAPD2	4442873	4439733	9606.ENSP00000356379	9606.ENSP00000325017	0	0	0	0	0.909	0	0	0.457	0.948
CYP2C8	CYP3A4	4443714	4440831	9606.ENSP00000360317	9606.ENSP00000337915	0	0	0.444	0.643	0.138	0	0.9	0.925	0.948
AOX1	CYP3A4	4444440	4440831	9606.ENSP00000363832	9606.ENSP00000337915	0	0	0	0	0.088	0	0.9	0.481	0.948
CYP2C9	CYP3A5	4434798	4433259	9606.ENSP00000260682	9606.ENSP00000222982	0	0	0.444	0.645	0.17	0	0.9	0.869	0.948
UBE2C	FOXM1	4441865	4441245	9606.ENSP00000348838	9606.ENSP00000342307	0	0	0	0	0.83	0.085	0	0.697	0.948
CYR61	IGFBP3	4448043	4445494	9606.ENSP00000398736	9606.ENSP00000370473	0	0	0	0	0.213	0	0.9	0.397	0.948
CDCA8	MELK	4444097	4437455	9606.ENSP00000362146	9606.ENSP00000298048	0	0	0	0	0.91	0	0	0.44	0.947
CTH	CDO1	4443637	4434136	9606.ENSP00000359976	9606.ENSP00000250535	0	0	0	0	0.063	0	0.9	0.481	0.947
PRC1	MCM4	4446249	4435007	9606.ENSP00000377793	9606.ENSP00000262105	0	0	0	0	0.924	0	0	0.339	0.947
KIF20A	FOXM1	4446341	4441245	9606.ENSP00000378356	9606.ENSP00000342307	0	0	0	0	0.844	0.05	0	0.673	0.947
PTTG1	TPX2	4446209	4437665	9606.ENSP00000377536	9606.ENSP00000300403	0	0	0	0	0.913	0	0	0.41	0.946
ADH1C	ALDH2	4449347	4434937	9606.ENSP00000426083	9606.ENSP00000261733	0.048	0	0	0	0.087	0	0.65	0.843	0.946
CCNA2	BARD1	4436109	4434809	9606.ENSP00000274026	9606.ENSP00000260947	0	0	0	0	0.25	0.128	0.9	0.279	0.946
ASPM	CCNB2	4442873	4436767	9606.ENSP00000356379	9606.ENSP00000288207	0	0	0	0	0.909	0.063	0	0.423	0.946
CYP2E1	CYP3A4	4449959	4440831	9606.ENSP00000440689	9606.ENSP00000337915	0	0	0.441	0.618	0.061	0	0.9	0.922	0.946
FHL2	FOXO1	4447410	4445233	9606.ENSP00000386665	9606.ENSP00000368880	0	0	0	0	0	0.294	0.9	0.298	0.946
G6PD	G6PC	4446162	4434327	9606.ENSP00000377192	9606.ENSP00000253801	0	0	0	0	0.055	0	0.8	0.737	0.946
RELN	FYN	4447749	4441647	9606.ENSP00000392423	9606.ENSP00000346671	0	0	0	0	0	0	0.9	0.488	0.946
CYP2C19	CYP3A5	4443723	4433259	9606.ENSP00000360372	9606.ENSP00000222982	0	0	0.444	0.635	0.117	0	0.9	0.876	0.946
HMMR	STAB2	4446202	4445802	9606.ENSP00000377492	9606.ENSP00000373539	0	0	0	0	0	0	0.9	0.474	0.945
CYP1A2	CYP3A5	4441211	4433259	9606.ENSP00000342007	9606.ENSP00000222982	0	0	0.442	0.615	0.095	0	0.9	0.815	0.945
CYP2C19	CYP4F2	4443723	4433177	9606.ENSP00000360372	9606.ENSP00000221700	0	0	0.445	0.59	0.13	0	0.9	0.674	0.945
HSD17B6	AKR1C3	4450358	4445414	9606.ENSP00000451406	9606.ENSP00000369927	0	0	0	0	0.062	0	0.8	0.732	0.945
KIF4A	NCAPG	4444386	4434176	9606.ENSP00000363524	9606.ENSP00000251496	0	0	0	0	0.89	0.064	0	0.51	0.945
ADH4	ALDH2	4435613	4434937	9606.ENSP00000265512	9606.ENSP00000261733	0.048	0	0	0	0.063	0	0.65	0.846	0.945
CDKN3	AURKA	4440665	4432988	9606.ENSP00000335357	9606.ENSP00000216911	0	0	0	0	0.901	0.194	0	0.36	0.945
SERPINA10	SPP2	4434989	4432703	9606.ENSP00000261994	9606.ENSP00000168148	0	0	0	0	0.479	0	0.9	0	0.945
CKAP5	CENPF	4449644	4442771	9606.ENSP00000432768	9606.ENSP00000355922	0	0	0	0	0.227	0	0.9	0.351	0.945
CYP2B6	CYP3A5	4439703	4433259	9606.ENSP00000324648	9606.ENSP00000222982	0	0	0.444	0.646	0.128	0	0.9	0.811	0.944
TPX2	TUBG1	4437665	4434173	9606.ENSP00000300403	9606.ENSP00000251413	0	0	0	0	0.231	0	0.9	0.335	0.944
CYP4A11	CYP2A6	4438655	4437722	9606.ENSP00000311095	9606.ENSP00000301141	0	0	0.442	0.573	0.135	0	0.9	0.605	0.944
EPHX2	CAT	4449539	4433793	9606.ENSP00000430269	9606.ENSP00000241052	0.049	0	0	0	0.088	0.111	0.9	0.395	0.944
CENPF	TPX2	4442771	4437665	9606.ENSP00000355922	9606.ENSP00000300403	0	0	0	0	0.891	0	0	0.51	0.944
CTH	SDS	4443637	4434551	9606.ENSP00000359976	9606.ENSP00000257549	0.165	0	0	0	0.081	0	0.8	0.68	0.944
TOP2A	FOXM1	4448614	4441245	9606.ENSP00000411532	9606.ENSP00000342307	0	0	0	0	0.844	0.379	0	0.471	0.944
PRC1	AURKB	4446249	4438898	9606.ENSP00000377793	9606.ENSP00000313950	0	0	0	0	0.904	0.055	0	0.436	0.944
GOT1	ASNS	4443556	4432722	9606.ENSP00000359539	9606.ENSP00000175506	0	0	0	0	0.194	0	0.9	0.362	0.944
ESR1	CXCL12	4448358	4446453	9606.ENSP00000405330	9606.ENSP00000379140	0	0	0	0	0	0	0.9	0.472	0.944
RGN	IDNK	4446652	4444727	9606.ENSP00000380365	9606.ENSP00000365601	0.247	0	0	0	0.061	0	0.9	0.307	0.944
CYP2C8	CYP4A11	4443714	4438655	9606.ENSP00000360317	9606.ENSP00000311095	0	0	0.444	0.586	0.113	0	0.9	0.682	0.944
CYP2E1	CYP4A11	4449959	4438655	9606.ENSP00000440689	9606.ENSP00000311095	0	0	0.439	0.574	0.097	0	0.9	0.686	0.944
GPC3	DCN	4446259	4432629	9606.ENSP00000377836	9606.ENSP00000052754	0	0	0	0	0.061	0.064	0.9	0.429	0.943
CEBPA	PPARGC1A	4449403	4435507	9606.ENSP00000427514	9606.ENSP00000264867	0	0	0	0	0	0	0.9	0.455	0.943
AOX1	AGXT2	4444440	4433532	9606.ENSP00000363832	9606.ENSP00000231420	0	0	0	0	0.064	0	0.9	0.444	0.943
ZFP36	DUSP1	4450924	4433734	9606.ENSP00000469647	9606.ENSP00000239223	0	0	0	0	0.793	0.085	0	0.724	0.943
HSD17B6	CYP3A4	4450358	4440831	9606.ENSP00000451406	9606.ENSP00000337915	0	0	0	0	0.066	0.064	0.9	0.428	0.943
FOXM1	AURKB	4441245	4438898	9606.ENSP00000342307	9606.ENSP00000313950	0	0	0	0	0.841	0	0	0.658	0.943
CYP2B6	CYP4A11	4439703	4438655	9606.ENSP00000324648	9606.ENSP00000311095	0	0	0.44	0.577	0.08	0	0.9	0.682	0.943
CYP4A11	CYP2C9	4438655	4434798	9606.ENSP00000311095	9606.ENSP00000260682	0	0	0.445	0.591	0.115	0	0.9	0.66	0.943
CYP2A7	CYP2A6	4437723	4437722	9606.ENSP00000301146	9606.ENSP00000301141	0	0	0.449	0.986	0.824	0.685	0	0.708	0.943
CYP2A6	CYP3A5	4437722	4433259	9606.ENSP00000301141	9606.ENSP00000222982	0	0	0.44	0.626	0.084	0	0.9	0.776	0.942
TOP2A	PRC1	4448614	4446249	9606.ENSP00000411532	9606.ENSP00000377793	0	0	0	0	0.915	0.186	0	0.229	0.942
APOA5	IGFBP1	4450143	4436188	9606.ENSP00000445002	9606.ENSP00000275525	0	0	0	0	0.394	0	0.9	0.126	0.942
NUSAP1	HJURP	4450429	4448718	9606.ENSP00000453403	9606.ENSP00000414109	0	0	0	0	0.904	0	0	0.418	0.942
KIF2C	ASPM	4443901	4442873	9606.ENSP00000361298	9606.ENSP00000356379	0	0	0	0	0.915	0.086	0	0.321	0.942
EHHADH	GCDH	4433550	4433208	9606.ENSP00000231887	9606.ENSP00000222214	0.048	0	0	0	0.13	0.085	0.9	0.352	0.942
CYP2C19	CYP4A11	4443723	4438655	9606.ENSP00000360372	9606.ENSP00000311095	0	0	0.444	0.592	0.102	0	0.9	0.655	0.942
CYP2J2	CYP4F2	4443694	4433177	9606.ENSP00000360247	9606.ENSP00000221700	0	0	0.443	0.606	0.083	0	0.9	0.709	0.942
KNTC1	CENPM	4440000	4432895	9606.ENSP00000328236	9606.ENSP00000215980	0	0	0	0	0.37	0	0.9	0.166	0.942
GBP2	IRF8	4443541	4435834	9606.ENSP00000359497	9606.ENSP00000268638	0	0	0	0	0.17	0	0.9	0.35	0.941
BARD1	POLE2	4434809	4432952	9606.ENSP00000260947	9606.ENSP00000216367	0	0	0	0	0.235	0	0.9	0.3	0.941
CYP2J2	CYP4F3	4443694	4433149	9606.ENSP00000360247	9606.ENSP00000221307	0	0	0.442	0.602	0.062	0	0.9	0.707	0.941
KIF4A	UBE2C	4444386	4441865	9606.ENSP00000363524	9606.ENSP00000348838	0	0	0	0	0.905	0.084	0	0.38	0.941
CYP4A11	CYP2C18	4438655	4436654	9606.ENSP00000311095	9606.ENSP00000285979	0	0	0.443	0.592	0.08	0	0.9	0.655	0.941
CYP2J2	CYP4A11	4443694	4438655	9606.ENSP00000360247	9606.ENSP00000311095	0	0	0.435	0.608	0.062	0	0.9	0.73	0.941
FOSB	EGR1	4433953	4433758	9606.ENSP00000245919	9606.ENSP00000239938	0	0	0	0	0.754	0.073	0	0.758	0.94
KIF4A	CDCA8	4444386	4444097	9606.ENSP00000363524	9606.ENSP00000362146	0	0	0	0	0.889	0	0	0.486	0.94
CYP2C9	CYP4F3	4434798	4433149	9606.ENSP00000260682	9606.ENSP00000221307	0	0	0.446	0.585	0.085	0	0.9	0.607	0.94
ENO3	PCK1	4439661	4439313	9606.ENSP00000324105	9606.ENSP00000319814	0	0	0	0	0	0	0.9	0.428	0.94
GPC3	BGN	4446259	4439914	9606.ENSP00000377836	9606.ENSP00000327336	0	0	0	0	0.065	0.064	0.9	0.4	0.94
LCAT	PEMT	4435353	4434430	9606.ENSP00000264005	9606.ENSP00000255389	0	0	0	0	0.065	0.085	0.9	0.391	0.94
CYP1A2	CYP4A11	4441211	4438655	9606.ENSP00000342007	9606.ENSP00000311095	0	0	0.438	0.575	0.077	0	0.9	0.583	0.939
CEBPA	ETS2	4449403	4442345	9606.ENSP00000427514	9606.ENSP00000353344	0	0	0	0	0.095	0.05	0.9	0.374	0.939
PTTG1	CENPF	4446209	4442771	9606.ENSP00000377536	9606.ENSP00000355922	0	0	0	0	0.856	0	0	0.592	0.939
CYP3A4	CYP4A11	4440831	4438655	9606.ENSP00000337915	9606.ENSP00000311095	0	0	0.447	0.685	0.116	0	0.9	0.765	0.939
COLEC11	FCN2	4448620	4436933	9606.ENSP00000411770	9606.ENSP00000291744	0	0	0	0.586	0.062	0.157	0.9	0.735	0.939
MCM7	CCNB2	4438312	4436767	9606.ENSP00000307288	9606.ENSP00000288207	0	0	0	0	0.845	0.182	0	0.559	0.939
HAO2	CAT	4451782	4433793	9606.ENSP00000483507	9606.ENSP00000241052	0	0	0	0	0.115	0	0.9	0.368	0.939
GPC3	IGFBP1	4446259	4436188	9606.ENSP00000377836	9606.ENSP00000275525	0	0	0	0	0.265	0	0.9	0.227	0.938
CYP2C19	CYP4F3	4443723	4433149	9606.ENSP00000360372	9606.ENSP00000221307	0	0	0.445	0.583	0.062	0	0.9	0.578	0.938
COL4A1	PLOD3	4444632	4433268	9606.ENSP00000364979	9606.ENSP00000223127	0	0	0	0	0.062	0.185	0.9	0.291	0.938
ID1	ETS2	4444680	4442345	9606.ENSP00000365280	9606.ENSP00000353344	0	0	0	0	0.061	0	0.9	0.394	0.938
C1R	CRP	4449877	4434405	9606.ENSP00000438615	9606.ENSP00000255030	0	0	0	0	0.061	0	0.9	0.399	0.938
AOX1	ADH1B	4444440	4438237	9606.ENSP00000363832	9606.ENSP00000306606	0	0	0	0	0.108	0	0.9	0.367	0.938
SPP1	GPC3	4446370	4446259	9606.ENSP00000378517	9606.ENSP00000377836	0	0	0	0	0.069	0	0.9	0.39	0.938
CYP2B6	CYP4F3	4439703	4433149	9606.ENSP00000324648	9606.ENSP00000221307	0	0	0.443	0.583	0.082	0	0.9	0.549	0.938
MCM7	RNASEH2A	4438312	4433165	9606.ENSP00000307288	9606.ENSP00000221486	0	0	0	0	0.925	0	0	0.209	0.938
CYP2J2	CYP3A4	4443694	4440831	9606.ENSP00000360247	9606.ENSP00000337915	0	0	0.439	0.647	0.089	0	0.9	0.708	0.938
ATF3	FOS	4441415	4438204	9606.ENSP00000344352	9606.ENSP00000306245	0	0	0	0.764	0.854	0.502	0	0.797	0.938
FYN	CD4	4441647	4432588	9606.ENSP00000346671	9606.ENSP00000011653	0	0	0	0	0.05	0.263	0.9	0.229	0.938
HBB	HPX	4440511	4435671	9606.ENSP00000333994	9606.ENSP00000265983	0	0	0	0	0.055	0	0.9	0.389	0.937
MYC	FOSB	4451407	4433953	9606.ENSP00000479618	9606.ENSP00000245919	0	0	0	0	0	0	0.9	0.404	0.937
RACGAP1	AURKA	4448310	4432988	9606.ENSP00000404190	9606.ENSP00000216911	0	0	0	0	0.874	0	0	0.523	0.937
ASS1	GOT1	4443929	4443556	9606.ENSP00000361471	9606.ENSP00000359539	0	0	0	0	0.25	0	0.9	0.231	0.937
UBE2C	MELK	4441865	4437455	9606.ENSP00000348838	9606.ENSP00000298048	0	0	0	0	0.89	0.079	0	0.428	0.937
ALDH6A1	AGXT2	4450308	4433532	9606.ENSP00000450436	9606.ENSP00000231420	0	0.037	0	0	0.07	0	0.9	0.385	0.937
CYP2C8	CYP4F2	4443714	4433177	9606.ENSP00000360317	9606.ENSP00000221700	0	0	0.445	0.581	0.085	0	0.9	0.518	0.937
TKT	G6PD	4447693	4446162	9606.ENSP00000391481	9606.ENSP00000377192	0.135	0	0	0	0.193	0.261	0	0.89	0.936
NUP62	SNRPB	4450981	4448654	9606.ENSP00000471191	9606.ENSP00000412566	0	0	0	0	0.365	0	0.9	0.073	0.936
PAFAH1B3	RELN	4450137	4447749	9606.ENSP00000444935	9606.ENSP00000392423	0	0	0	0	0.049	0	0.9	0.386	0.936
FTCD	ALDH1L1	4436927	4436080	9606.ENSP00000291670	9606.ENSP00000273450	0	0	0	0	0.064	0	0.9	0.377	0.936
PTTG1	NCAPG	4446209	4434176	9606.ENSP00000377536	9606.ENSP00000251496	0	0	0	0	0.902	0	0	0.375	0.936
DAK	ALDOB	4446343	4444463	9606.ENSP00000378360	9606.ENSP00000363988	0	0	0	0	0.077	0	0.9	0.362	0.936
HMMR	NCAPG	4446202	4434176	9606.ENSP00000377492	9606.ENSP00000251496	0	0	0	0	0.929	0	0	0.136	0.936
CYP2B6	CYP4F2	4439703	4433177	9606.ENSP00000324648	9606.ENSP00000221700	0	0	0.443	0.597	0.079	0	0.9	0.515	0.936
NUSAP1	MELK	4450429	4437455	9606.ENSP00000453403	9606.ENSP00000298048	0	0	0	0	0.873	0	0	0.52	0.936
ASPM	CDKN3	4442873	4440665	9606.ENSP00000356379	9606.ENSP00000335357	0	0	0	0	0.897	0.094	0	0.369	0.936
PTGS2	CYP2B6	4442894	4439703	9606.ENSP00000356438	9606.ENSP00000324648	0	0	0	0	0.055	0	0.9	0.384	0.936
IGFBP3	IGFBP1	4445494	4436188	9606.ENSP00000370473	9606.ENSP00000275525	0	0	0	0.755	0.214	0	0.9	0.929	0.936
CYP2E1	ADH6	4449959	4446342	9606.ENSP00000440689	9606.ENSP00000378359	0.043	0	0	0	0.079	0	0.9	0.363	0.936
UBE2C	UBE2Q1	4441865	4436953	9606.ENSP00000348838	9606.ENSP00000292211	0	0	0	0	0	0	0.9	0.394	0.936
PTGS2	CYP2C9	4442894	4434798	9606.ENSP00000356438	9606.ENSP00000260682	0	0	0	0	0.055	0	0.9	0.377	0.936
CDC20	NCAPD2	4443940	4439733	9606.ENSP00000361540	9606.ENSP00000325017	0	0	0	0	0.917	0	0	0.256	0.935
NQO1	ADK	4439310	4436683	9606.ENSP00000319788	9606.ENSP00000286621	0	0	0	0	0	0.869	0	0.527	0.935
C8B	C6	4443704	4435261	9606.ENSP00000360281	9606.ENSP00000263413	0	0	0	0.785	0.321	0	0.9	0.43	0.935
FBP1	HKDC1	4448472	4441643	9606.ENSP00000408025	9606.ENSP00000346643	0	0	0	0	0.049	0	0.9	0.378	0.935
CYP26A1	ADH1A	4433297	4432830	9606.ENSP00000224356	9606.ENSP00000209668	0.043	0	0	0	0.059	0	0.9	0.364	0.935
CYP2E1	CYP4F3	4449959	4433149	9606.ENSP00000440689	9606.ENSP00000221307	0	0	0.441	0.575	0.061	0	0.9	0.493	0.935
UHRF1	MCM5	4451406	4432914	9606.ENSP00000479617	9606.ENSP00000216122	0	0	0	0	0.925	0	0	0.167	0.935
LCAT	PON1	4435353	4433224	9606.ENSP00000264005	9606.ENSP00000222381	0	0	0	0	0.065	0	0.72	0.772	0.935
HAO1	HOGA1	4445115	4443592	9606.ENSP00000368066	9606.ENSP00000359680	0.148	0	0	0	0.15	0	0.9	0.215	0.935
CTH	GOT1	4443637	4443556	9606.ENSP00000359976	9606.ENSP00000359539	0	0	0	0	0.08	0	0.9	0.359	0.935
SPP1	IGFBP3	4446370	4445494	9606.ENSP00000378517	9606.ENSP00000370473	0	0	0	0	0.07	0	0.9	0.359	0.935
CYP2E1	CYP4F2	4449959	4433177	9606.ENSP00000440689	9606.ENSP00000221700	0	0	0.44	0.575	0.061	0	0.9	0.493	0.935
FOXM1	TPX2	4441245	4437665	9606.ENSP00000342307	9606.ENSP00000300403	0	0	0	0	0.903	0	0	0.359	0.935
ACSM3	ACADS	4436811	4433826	9606.ENSP00000289416	9606.ENSP00000242592	0	0.005	0	0	0.064	0	0.9	0.363	0.935
EPHX2	CYP2B6	4449539	4439703	9606.ENSP00000430269	9606.ENSP00000324648	0.056	0	0	0	0.051	0.081	0.9	0.326	0.934
ALDH6A1	ACAT1	4450308	4435651	9606.ENSP00000450436	9606.ENSP00000265838	0	0	0	0	0.27	0	0.9	0.179	0.934
ALDH6A1	EHHADH	4450308	4433550	9606.ENSP00000450436	9606.ENSP00000231887	0	0	0	0	0.129	0	0.9	0.307	0.934
CYP2B6	CYP26A1	4439703	4433297	9606.ENSP00000324648	9606.ENSP00000224356	0	0	0.429	0.568	0	0	0.9	0.492	0.934
NEDD4L	UBE2C	4446996	4441865	9606.ENSP00000383199	9606.ENSP00000348838	0	0	0	0	0.06	0.188	0.9	0.245	0.934
HAO2	HOGA1	4451782	4443592	9606.ENSP00000483507	9606.ENSP00000359680	0.148	0	0	0	0.15	0	0.9	0.203	0.934
JUNB	EGR1	4437951	4433758	9606.ENSP00000303315	9606.ENSP00000239938	0	0	0	0	0.723	0.572	0	0.484	0.933
PTGS2	CYP4F3	4442894	4433149	9606.ENSP00000356438	9606.ENSP00000221307	0	0	0	0	0.05	0	0.9	0.358	0.933
CYP2C8	CYP4F3	4443714	4433149	9606.ENSP00000360317	9606.ENSP00000221307	0	0	0.445	0.581	0.062	0	0.9	0.444	0.933
CDCA8	FOXM1	4444097	4441245	9606.ENSP00000362146	9606.ENSP00000342307	0	0	0	0	0.907	0	0	0.305	0.933
BGN	DCN	4439914	4432629	9606.ENSP00000327336	9606.ENSP00000052754	0	0	0.431	0.951	0.314	0	0.9	0.955	0.933
MYC	IRF8	4451407	4435834	9606.ENSP00000479618	9606.ENSP00000268638	0	0	0	0	0	0	0.9	0.36	0.933
NCAPD2	CCNA2	4439733	4436109	9606.ENSP00000325017	9606.ENSP00000274026	0	0	0	0	0.917	0	0	0.224	0.933
CYP4A11	CYP3A5	4438655	4433259	9606.ENSP00000311095	9606.ENSP00000222982	0	0	0.447	0.675	0.082	0	0.9	0.614	0.933
CCNB2	MCM4	4436767	4435007	9606.ENSP00000288207	9606.ENSP00000262105	0	0	0	0	0.817	0.26	0	0.548	0.933
GCGR	ADCY1	4447027	4437392	9606.ENSP00000383558	9606.ENSP00000297323	0	0	0	0	0	0.092	0.9	0.329	0.933
HAO2	HAO1	4451782	4445115	9606.ENSP00000483507	9606.ENSP00000368066	0	0	0.449	0.939	0.299	0	0.9	0.936	0.932
ABAT	ALDH2	4446571	4434937	9606.ENSP00000379845	9606.ENSP00000261733	0.053	0	0	0	0.113	0.126	0.9	0.219	0.932
CYP1A2	CYP2A6	4441211	4437722	9606.ENSP00000342007	9606.ENSP00000301141	0	0	0.435	0.776	0.108	0	0.9	0.912	0.932
ADH4	CYP26A1	4435613	4433297	9606.ENSP00000265512	9606.ENSP00000224356	0.043	0	0	0	0.097	0	0.9	0.311	0.932
ADAMTS1	THBS1	4436609	4434771	9606.ENSP00000284984	9606.ENSP00000260356	0	0	0	0.545	0.096	0	0.9	0.64	0.932
ASS1	OAT	4443929	4443204	9606.ENSP00000361471	9606.ENSP00000357838	0.295	0	0	0	0.347	0	0	0.865	0.932
SPP1	IGFBP1	4446370	4436188	9606.ENSP00000378517	9606.ENSP00000275525	0	0	0	0	0.069	0	0.9	0.33	0.932
IGFBP3	STC2	4445494	4435556	9606.ENSP00000370473	9606.ENSP00000265087	0	0	0	0	0.156	0	0.9	0.263	0.932
NUSAP1	KIF4A	4450429	4444386	9606.ENSP00000453403	9606.ENSP00000363524	0	0	0	0	0.861	0	0	0.535	0.932
CYP3A4	CYP26A1	4440831	4433297	9606.ENSP00000337915	9606.ENSP00000224356	0	0	0.433	0.599	0	0	0.9	0.502	0.932
KIF2C	FOXM1	4443901	4441245	9606.ENSP00000361298	9606.ENSP00000342307	0	0	0	0	0.895	0.05	0	0.372	0.932
MCM3	TOP2A	4451546	4448614	9606.ENSP00000480987	9606.ENSP00000411532	0	0	0	0	0.855	0.05	0	0.539	0.931
CYR61	SPP1	4448043	4446370	9606.ENSP00000398736	9606.ENSP00000378517	0	0	0	0	0.061	0	0.9	0.328	0.931
CKAP5	KNTC1	4449644	4440000	9606.ENSP00000432768	9606.ENSP00000328236	0	0	0	0	0.198	0	0.9	0.218	0.931
CYP1A2	CYP2C9	4441211	4434798	9606.ENSP00000342007	9606.ENSP00000260682	0	0	0.444	0.772	0.077	0	0.9	0.923	0.931
CYP1A2	CYP2B6	4441211	4439703	9606.ENSP00000342007	9606.ENSP00000324648	0	0	0.439	0.767	0.068	0	0.9	0.92	0.93
CYP3A5	HSD17B2	4433259	4432776	9606.ENSP00000222982	9606.ENSP00000199936	0	0	0	0	0.183	0.064	0.9	0.195	0.93
HJURP	KIF20A	4448718	4446341	9606.ENSP00000414109	9606.ENSP00000378356	0	0	0	0	0.917	0	0	0.19	0.93
CYP2C8	PTGS2	4443714	4442894	9606.ENSP00000360317	9606.ENSP00000356438	0	0	0	0	0.055	0	0.9	0.324	0.93
HMMR	TUBG1	4446202	4434173	9606.ENSP00000377492	9606.ENSP00000251413	0	0	0	0	0.136	0	0.9	0.259	0.93
HOGA1	GOT1	4443592	4443556	9606.ENSP00000359680	9606.ENSP00000359539	0.044	0	0	0	0.062	0	0.9	0.312	0.93
CKAP5	CDC20	4449644	4443940	9606.ENSP00000432768	9606.ENSP00000361540	0	0	0	0	0.169	0	0.9	0.234	0.93
GOT1	TAT	4443556	4441813	9606.ENSP00000359539	9606.ENSP00000348234	0	0	0	0	0.079	0	0.8	0.651	0.93
CYP2E1	CYP1A2	4449959	4441211	9606.ENSP00000440689	9606.ENSP00000342007	0	0	0.442	0.769	0.062	0	0.9	0.921	0.93
ACADM	GCDH	4443625	4433208	9606.ENSP00000359871	9606.ENSP00000222214	0	0	0.299	0.672	0.116	0	0.9	0.557	0.93
RDH16	AOX1	4446780	4444440	9606.ENSP00000381206	9606.ENSP00000363832	0	0	0	0	0.062	0	0.9	0.318	0.93
RNASEH2A	MCM5	4433165	4432914	9606.ENSP00000221486	9606.ENSP00000216122	0	0	0	0	0.927	0	0	0.08	0.93
CYP2C19	CYP1A2	4443723	4441211	9606.ENSP00000360372	9606.ENSP00000342007	0	0	0.444	0.751	0	0	0.9	0.923	0.93
LPA	PON1	4439432	4433224	9606.ENSP00000321334	9606.ENSP00000222381	0	0	0	0	0.171	0	0.72	0.725	0.93
NCOR1	PPARGC1A	4435844	4435507	9606.ENSP00000268712	9606.ENSP00000264867	0	0	0	0	0	0	0.9	0.324	0.929
MCM4	NCAPG	4435007	4434176	9606.ENSP00000262105	9606.ENSP00000251496	0	0	0	0	0.913	0	0	0.212	0.929
AOX1	CYP1A2	4444440	4441211	9606.ENSP00000363832	9606.ENSP00000342007	0	0	0	0	0.062	0	0.9	0.309	0.929
PPARGC1A	EHHADH	4435507	4433550	9606.ENSP00000264867	9606.ENSP00000231887	0	0	0	0	0	0	0.9	0.32	0.929
TOP2A	MCM2	4448614	4435544	9606.ENSP00000411532	9606.ENSP00000265056	0	0	0	0	0.812	0.05	0	0.637	0.929
RACGAP1	MELK	4448310	4437455	9606.ENSP00000404190	9606.ENSP00000298048	0	0	0	0	0.88	0	0	0.431	0.929
KIF20A	MELK	4446341	4437455	9606.ENSP00000378356	9606.ENSP00000298048	0	0	0	0	0.909	0	0	0.256	0.929
HSD11B1	CYP3A4	4442791	4440831	9606.ENSP00000355995	9606.ENSP00000337915	0	0	0	0	0.113	0.059	0.9	0.255	0.929
CDC20	FEN1	4443940	4438133	9606.ENSP00000361540	9606.ENSP00000305480	0	0	0	0	0.868	0.187	0	0.392	0.929
AOX1	ADH1A	4444440	4432830	9606.ENSP00000363832	9606.ENSP00000209668	0	0	0	0	0.097	0	0.9	0.281	0.929
MELK	AURKA	4437455	4432988	9606.ENSP00000298048	9606.ENSP00000216911	0	0	0	0.738	0.917	0	0	0.54	0.928
ABAT	AGXT2	4446571	4433532	9606.ENSP00000379845	9606.ENSP00000231420	0	0	0	0.582	0.086	0	0.9	0.607	0.928
CXCL12	MAP2K1	4446453	4437859	9606.ENSP00000379140	9606.ENSP00000302486	0	0	0	0	0	0	0.9	0.316	0.928
CYP2A6	CYP26A1	4437722	4433297	9606.ENSP00000301141	9606.ENSP00000224356	0	0	0.407	0.574	0.055	0	0.9	0.34	0.928
CDCA8	OIP5	4444097	4433119	9606.ENSP00000362146	9606.ENSP00000220514	0	0	0	0	0.901	0	0	0.308	0.928
ALDH3A1	ABAT	4448623	4446571	9606.ENSP00000411821	9606.ENSP00000379845	0.053	0	0	0	0.113	0.126	0.9	0.173	0.928
CKAP5	CDCA8	4449644	4444097	9606.ENSP00000432768	9606.ENSP00000362146	0	0	0	0	0.164	0	0.9	0.216	0.928
CYP2C8	CYP1A2	4443714	4441211	9606.ENSP00000360317	9606.ENSP00000342007	0	0	0.444	0.763	0	0	0.9	0.891	0.928
C6	C9	4435261	4435259	9606.ENSP00000263413	9606.ENSP00000263408	0	0	0	0.733	0.171	0	0.9	0.655	0.928
PTTG1	CDKN3	4446209	4440665	9606.ENSP00000377536	9606.ENSP00000335357	0	0	0	0	0.907	0	0	0.262	0.928
ASPM	UBE2C	4442873	4441865	9606.ENSP00000356379	9606.ENSP00000348838	0	0	0	0	0.898	0.081	0	0.296	0.928
FOXM1	MAP2K1	4441245	4437859	9606.ENSP00000342307	9606.ENSP00000302486	0	0	0	0	0.063	0.056	0.9	0.286	0.928
CYP4A11	CYP26A1	4438655	4433297	9606.ENSP00000311095	9606.ENSP00000224356	0	0	0.431	0.622	0.049	0	0.9	0.421	0.928
PTGS2	CYP4F2	4442894	4433177	9606.ENSP00000356438	9606.ENSP00000221700	0	0	0	0	0.05	0	0.9	0.305	0.928
CYP1A2	CYP26A1	4441211	4433297	9606.ENSP00000342007	9606.ENSP00000224356	0	0	0.436	0.554	0	0	0.9	0.313	0.928
PTTG1	KIF2C	4446209	4443901	9606.ENSP00000377536	9606.ENSP00000361298	0	0	0	0	0.872	0	0	0.463	0.928
EPHX2	HAO1	4449539	4445115	9606.ENSP00000430269	9606.ENSP00000368066	0.156	0	0	0	0.063	0	0.9	0.206	0.928
ESR1	FOSB	4448358	4433953	9606.ENSP00000405330	9606.ENSP00000245919	0	0	0	0	0	0.098	0.9	0.267	0.928
GOT1	HPD	4443556	4436793	9606.ENSP00000359539	9606.ENSP00000289004	0.135	0	0	0	0.063	0	0.9	0.226	0.928
IRF8	EGR1	4435834	4433758	9606.ENSP00000268638	9606.ENSP00000239938	0	0	0	0	0	0.056	0.9	0.297	0.927
NCOR1	RORA	4435844	4434895	9606.ENSP00000268712	9606.ENSP00000261523	0	0	0	0	0	0.141	0.9	0.219	0.927
HSD17B6	AOX1	4450358	4444440	9606.ENSP00000451406	9606.ENSP00000363832	0	0	0	0	0.062	0	0.9	0.292	0.927
CYP3A4	HSD17B2	4440831	4432776	9606.ENSP00000337915	9606.ENSP00000199936	0	0	0	0	0.07	0.064	0.9	0.262	0.927
LDLR	AGTR1	4450447	4449040	9606.ENSP00000454071	9606.ENSP00000419422	0	0	0	0	0	0.062	0.9	0.291	0.927
HMMR	CENPF	4446202	4442771	9606.ENSP00000377492	9606.ENSP00000355922	0	0	0	0	0.88	0	0	0.409	0.926
SFN	CCNB2	4441103	4436767	9606.ENSP00000340989	9606.ENSP00000288207	0	0	0	0	0.061	0.19	0.9	0.142	0.926
CYP26A1	CYP3A5	4433297	4433259	9606.ENSP00000224356	9606.ENSP00000222982	0	0	0.434	0.597	0	0	0.9	0.331	0.926
FOXO1	PPARGC1A	4445233	4435507	9606.ENSP00000368880	9606.ENSP00000264867	0	0	0	0	0	0.084	0.8	0.633	0.926
CYP2C19	PTGS2	4443723	4442894	9606.ENSP00000360372	9606.ENSP00000356438	0	0	0	0	0.055	0	0.9	0.286	0.926
IL33	IL1RAP	4445550	4438954	9606.ENSP00000370842	9606.ENSP00000314807	0	0	0	0	0.061	0.731	0	0.732	0.926
AOX1	CYP2C9	4444440	4434798	9606.ENSP00000363832	9606.ENSP00000260682	0	0	0	0	0.064	0	0.9	0.266	0.925
CEBPA	NCOR1	4449403	4435844	9606.ENSP00000427514	9606.ENSP00000268712	0	0	0	0	0	0	0.9	0.29	0.925
ALDH6A1	ACAA2	4450308	4436619	9606.ENSP00000450436	9606.ENSP00000285093	0	0	0	0	0.192	0	0.9	0.149	0.925
IGFBP1	STC2	4436188	4435556	9606.ENSP00000275525	9606.ENSP00000265087	0	0	0	0	0.098	0	0.9	0.236	0.925
BBOX1	ALDH2	4435209	4434937	9606.ENSP00000263182	9606.ENSP00000261733	0	0	0	0	0.096	0.111	0.9	0.18	0.925
AKR1C3	CYP3A4	4445414	4440831	9606.ENSP00000369927	9606.ENSP00000337915	0	0	0	0	0.062	0	0.9	0.268	0.925
TOP2A	PTTG1	4448614	4446209	9606.ENSP00000411532	9606.ENSP00000377536	0	0	0	0	0.854	0	0	0.507	0.925
HAO2	EPHX2	4451782	4449539	9606.ENSP00000483507	9606.ENSP00000430269	0.156	0	0	0	0.062	0	0.9	0.168	0.925
SPP1	CP	4446370	4435459	9606.ENSP00000378517	9606.ENSP00000264613	0	0	0	0	0.088	0	0.9	0.246	0.925
MCM3	RNASEH2A	4451546	4433165	9606.ENSP00000480987	9606.ENSP00000221486	0	0	0	0	0.92	0	0	0.101	0.925
LIPC	CETP	4437532	4432783	9606.ENSP00000299022	9606.ENSP00000200676	0	0	0	0	0.088	0	0.54	0.837	0.925
ACAT1	MLYCD	4435651	4435080	9606.ENSP00000265838	9606.ENSP00000262430	0	0	0	0	0.063	0	0.9	0.268	0.925
TOP2A	MCM7	4448614	4438312	9606.ENSP00000411532	9606.ENSP00000307288	0	0	0	0	0.744	0.05	0	0.719	0.925
CCNA2	TRIP13	4436109	4432699	9606.ENSP00000274026	9606.ENSP00000166345	0	0	0	0	0.905	0.165	0	0.132	0.925
IDO2	INMT	4450084	4432594	9606.ENSP00000443432	9606.ENSP00000013222	0	0	0	0	0.086	0	0.9	0.251	0.925
TOP2A	RACGAP1	4448614	4448310	9606.ENSP00000411532	9606.ENSP00000404190	0	0	0	0	0.887	0	0	0.359	0.924
TPX2	OIP5	4437665	4433119	9606.ENSP00000300403	9606.ENSP00000220514	0	0	0	0	0.839	0	0	0.549	0.924
AOX1	ADH4	4444440	4435613	9606.ENSP00000363832	9606.ENSP00000265512	0	0	0	0	0.063	0	0.9	0.258	0.924
AKR1C3	HSD17B2	4445414	4432776	9606.ENSP00000369927	9606.ENSP00000199936	0	0	0	0	0.062	0	0.8	0.63	0.924
C7	C6	4439494	4435261	9606.ENSP00000322061	9606.ENSP00000263413	0	0	0	0.811	0.173	0	0.9	0.645	0.924
ADH1C	CYP26A1	4449347	4433297	9606.ENSP00000426083	9606.ENSP00000224356	0.043	0	0	0	0.059	0	0.9	0.262	0.924
CENPF	MELK	4442771	4437455	9606.ENSP00000355922	9606.ENSP00000298048	0	0	0	0	0.874	0	0	0.427	0.924
ADH6	CYP26A1	4446342	4433297	9606.ENSP00000378359	9606.ENSP00000224356	0.043	0	0	0	0.061	0	0.9	0.257	0.924
CKAP5	CDCA5	4449644	4436187	9606.ENSP00000432768	9606.ENSP00000275517	0	0	0	0	0.122	0	0.9	0.213	0.924
APOA5	CETP	4450143	4432783	9606.ENSP00000445002	9606.ENSP00000200676	0	0	0	0	0.061	0	0.72	0.735	0.924
PTTG1	HMMR	4446209	4446202	9606.ENSP00000377536	9606.ENSP00000377492	0	0	0	0	0.9	0	0	0.266	0.923
LCN2	ARG1	4444080	4441926	9606.ENSP00000362108	9606.ENSP00000349446	0	0	0	0	0.061	0	0.9	0.25	0.923
ACADS	GCDH	4433826	4433208	9606.ENSP00000242592	9606.ENSP00000222214	0	0	0.32	0.764	0.063	0	0.9	0.696	0.923
NUSAP1	HMMR	4450429	4446202	9606.ENSP00000453403	9606.ENSP00000377492	0	0	0	0	0.834	0	0	0.554	0.923
KIF2C	NCAPG	4443901	4434176	9606.ENSP00000361298	9606.ENSP00000251496	0	0	0	0	0.884	0.064	0	0.348	0.923
CENPF	UBE2C	4442771	4441865	9606.ENSP00000355922	9606.ENSP00000348838	0	0	0	0	0.85	0	0	0.51	0.923
ATF3	JUNB	4441415	4437951	9606.ENSP00000344352	9606.ENSP00000303315	0	0	0	0	0.449	0.678	0	0.603	0.923
ALDH2	AGXT2	4434937	4433532	9606.ENSP00000261733	9606.ENSP00000231420	0.053	0.002	0	0	0.113	0.126	0.9	0.115	0.923
HJURP	TOP2A	4448718	4448614	9606.ENSP00000414109	9606.ENSP00000411532	0	0	0	0	0.901	0	0	0.255	0.923
ASPM	KNTC1	4442873	4440000	9606.ENSP00000356379	9606.ENSP00000328236	0	0	0	0	0.874	0.261	0	0.238	0.923
NUSAP1	PTTG1	4450429	4446209	9606.ENSP00000453403	9606.ENSP00000377536	0	0	0	0	0.859	0	0	0.477	0.923
PCK1	NCOR1	4439313	4435844	9606.ENSP00000319814	9606.ENSP00000268712	0	0	0	0	0.064	0	0.9	0.244	0.923
AGPAT9	GPD1	4451692	4437724	9606.ENSP00000482571	9606.ENSP00000301149	0.07	0	0	0	0.062	0.046	0.9	0.218	0.923
UHRF1	TOP2A	4451406	4448614	9606.ENSP00000479617	9606.ENSP00000411532	0.045	0	0	0	0.773	0.457	0	0.42	0.922
HJURP	UBE2C	4448718	4441865	9606.ENSP00000414109	9606.ENSP00000348838	0	0	0	0	0.89	0	0	0.32	0.922
GOT1	CDO1	4443556	4434136	9606.ENSP00000359539	9606.ENSP00000250535	0	0	0	0	0.073	0	0.9	0.226	0.922
IGFBP1	CP	4436188	4435459	9606.ENSP00000275525	9606.ENSP00000264613	0	0	0	0	0.146	0	0.9	0.164	0.922
CPS1	GLS2	4448239	4438590	9606.ENSP00000402608	9606.ENSP00000310447	0	0	0	0	0.087	0	0.9	0.216	0.922
UHRF1	MCM2	4451406	4435544	9606.ENSP00000479617	9606.ENSP00000265056	0	0	0	0	0.894	0	0	0.294	0.922
ABAT	CNDP1	4446571	4442175	9606.ENSP00000379845	9606.ENSP00000351682	0.074	0	0	0	0.107	0.086	0.9	0.118	0.921
PPARGC1A	RORA	4435507	4434895	9606.ENSP00000264867	9606.ENSP00000261523	0	0	0	0	0.061	0	0.9	0.23	0.921
MPV17	CAT	4445312	4433793	9606.ENSP00000369383	9606.ENSP00000241052	0	0	0	0	0.175	0	0.9	0.119	0.921
HSD17B6	CYP3A5	4450358	4433259	9606.ENSP00000451406	9606.ENSP00000222982	0	0	0	0	0.066	0.064	0.9	0.213	0.921
C6	CFP	4435261	4434012	9606.ENSP00000263413	9606.ENSP00000247153	0	0	0	0	0	0	0.9	0.251	0.921
HAMP	LCN2	4451011	4444080	9606.ENSP00000471894	9606.ENSP00000362108	0	0	0	0	0.052	0.818	0	0.583	0.921
UHRF1	CDC20	4451406	4443940	9606.ENSP00000479617	9606.ENSP00000361540	0	0	0	0	0.894	0	0	0.284	0.921
CD163	HBB	4442211	4440511	9606.ENSP00000352071	9606.ENSP00000333994	0	0	0	0	0.124	0	0.9	0.173	0.921
RACGAP1	CDC20	4448310	4443940	9606.ENSP00000404190	9606.ENSP00000361540	0	0	0	0	0.882	0	0	0.348	0.92
COLEC11	MBL2	4448620	4444298	9606.ENSP00000411770	9606.ENSP00000363079	0	0	0	0.743	0.064	0	0.9	0.736	0.92
CYR61	IGFBP1	4448043	4436188	9606.ENSP00000398736	9606.ENSP00000275525	0	0	0	0	0.078	0	0.9	0.206	0.92
CYP2J2	PTGS2	4443694	4442894	9606.ENSP00000360247	9606.ENSP00000356438	0	0	0	0	0.055	0	0.9	0.226	0.92
FEN1	CCNA2	4438133	4436109	9606.ENSP00000305480	9606.ENSP00000274026	0	0	0	0	0.817	0.402	0	0.333	0.92
CKAP5	HMMR	4449644	4446202	9606.ENSP00000432768	9606.ENSP00000377492	0	0	0	0	0.18	0	0.9	0.103	0.92
HJURP	CENPF	4448718	4442771	9606.ENSP00000414109	9606.ENSP00000355922	0	0	0	0	0.893	0	0	0.279	0.92
CYP2E1	HSD11B1	4449959	4442791	9606.ENSP00000440689	9606.ENSP00000355995	0	0	0	0	0.102	0.131	0.9	0.102	0.92
NCOR1	EGR2	4435844	4433822	9606.ENSP00000268712	9606.ENSP00000242480	0	0	0	0	0	0.185	0.9	0.108	0.92
EHHADH	AGXT2	4433550	4433532	9606.ENSP00000231887	9606.ENSP00000231420	0	0	0	0	0.081	0	0.9	0.195	0.919
AOX1	CYP2C8	4444440	4443714	9606.ENSP00000363832	9606.ENSP00000360317	0	0	0	0	0.064	0	0.9	0.211	0.919
DUSP6	DUSP1	4436348	4433734	9606.ENSP00000279488	9606.ENSP00000239223	0	0	0	0.789	0.062	0	0.9	0.844	0.919
VIPR1	ADCY1	4439908	4437392	9606.ENSP00000327246	9606.ENSP00000297323	0	0	0	0	0	0.092	0.9	0.188	0.919
CDKN3	CCNB2	4440665	4436767	9606.ENSP00000335357	9606.ENSP00000288207	0	0	0	0	0.857	0.185	0	0.363	0.919
HJURP	AURKB	4448718	4438898	9606.ENSP00000414109	9606.ENSP00000313950	0	0	0	0	0.885	0	0	0.324	0.919
PRC1	UBE2C	4446249	4441865	9606.ENSP00000377793	9606.ENSP00000348838	0	0	0	0	0.899	0	0	0.235	0.919
HSD11B1	CYP2A6	4442791	4437722	9606.ENSP00000355995	9606.ENSP00000301141	0	0	0	0	0.11	0.134	0.9	0.081	0.919
AKR1C3	CYP3A5	4445414	4433259	9606.ENSP00000369927	9606.ENSP00000222982	0	0	0	0	0.062	0	0.9	0.211	0.919
TAT	BHMT	4441813	4436127	9606.ENSP00000348234	9606.ENSP00000274353	0	0	0	0	0.102	0	0.9	0.18	0.919
CYR61	STC2	4448043	4435556	9606.ENSP00000398736	9606.ENSP00000265087	0	0	0	0	0.213	0	0.9	0.054	0.919
CYP2J2	CYP1A2	4443694	4441211	9606.ENSP00000360247	9606.ENSP00000342007	0	0	0.439	0.787	0	0	0.9	0.581	0.919
HJURP	FOXM1	4448718	4441245	9606.ENSP00000414109	9606.ENSP00000342307	0	0	0	0	0.897	0	0	0.246	0.919
AGTR1	CD4	4449040	4432588	9606.ENSP00000419422	9606.ENSP00000011653	0	0	0	0	0.044	0.064	0.9	0.21	0.919
CDKN3	MELK	4440665	4437455	9606.ENSP00000335357	9606.ENSP00000298048	0	0	0	0	0.9	0.182	0	0.097	0.919
SFN	SIK1	4441103	4435928	9606.ENSP00000340989	9606.ENSP00000270162	0	0	0	0	0.061	0.185	0.9	0.064	0.918
NUSAP1	FOXM1	4450429	4441245	9606.ENSP00000453403	9606.ENSP00000342307	0	0	0	0	0.888	0	0	0.298	0.918
ADH1C	AOX1	4449347	4444440	9606.ENSP00000426083	9606.ENSP00000363832	0	0	0	0	0.063	0	0.9	0.203	0.918
MBL2	COLEC10	4444298	4440388	9606.ENSP00000363079	9606.ENSP00000332723	0	0	0	0.749	0.109	0	0.9	0.525	0.918
CTH	AGXT2	4443637	4433532	9606.ENSP00000359976	9606.ENSP00000231420	0	0	0	0	0.08	0	0.9	0.186	0.918
ID1	THBS1	4444680	4434771	9606.ENSP00000365280	9606.ENSP00000260356	0	0	0	0	0.071	0	0.8	0.596	0.918
CYR61	EVA1A	4448043	4433601	9606.ENSP00000398736	9606.ENSP00000233712	0	0	0	0	0.207	0	0.9	0.05	0.918
LY6E	THY1	4449457	4436571	9606.ENSP00000428572	9606.ENSP00000284240	0	0	0	0	0	0	0.9	0.222	0.918
ADH1B	CYP26A1	4438237	4433297	9606.ENSP00000306606	9606.ENSP00000224356	0.043	0	0	0	0.059	0	0.9	0.205	0.918
ECM1	SPP2	4443247	4432703	9606.ENSP00000358045	9606.ENSP00000168148	0	0	0	0	0	0	0.9	0.211	0.917
ALDH6A1	AOX1	4450308	4444440	9606.ENSP00000450436	9606.ENSP00000363832	0	0	0	0	0.088	0	0.9	0.171	0.917
ANGPTL4	NCOR1	4437761	4435844	9606.ENSP00000301455	9606.ENSP00000268712	0	0	0	0	0	0	0.9	0.207	0.917
NEDD4L	CDC20	4446996	4443940	9606.ENSP00000383199	9606.ENSP00000361540	0	0	0	0	0.08	0.085	0.9	0.136	0.917
APOA5	LPA	4450143	4439432	9606.ENSP00000445002	9606.ENSP00000321334	0	0	0	0	0.222	0	0.72	0.651	0.917
AGTR1	GCGR	4449040	4447027	9606.ENSP00000419422	9606.ENSP00000383558	0	0	0	0	0.064	0	0.9	0.189	0.917
HJURP	KIF2C	4448718	4443901	9606.ENSP00000414109	9606.ENSP00000361298	0	0	0	0	0.888	0	0	0.289	0.917
THBS1	CFP	4434771	4434012	9606.ENSP00000260356	9606.ENSP00000247153	0	0	0	0.66	0	0	0.9	0.526	0.917
TOP2A	HMMR	4448614	4446202	9606.ENSP00000411532	9606.ENSP00000377492	0	0	0	0	0.849	0	0	0.471	0.917
LDLR	CD4	4450447	4432588	9606.ENSP00000454071	9606.ENSP00000011653	0	0	0	0	0	0	0.9	0.195	0.916
CYP3A4	CYP3A5	4440831	4433259	9606.ENSP00000337915	9606.ENSP00000222982	0	0	0.449	0.983	0.183	0	0.9	0.923	0.916
HAO2	SLC27A2	4451782	4435783	9606.ENSP00000483507	9606.ENSP00000267842	0	0	0	0	0.078	0	0.9	0.164	0.916
PHLDA1	AURKA	4435719	4432988	9606.ENSP00000266671	9606.ENSP00000216911	0	0	0	0	0	0	0.9	0.203	0.916
HJURP	CCNB2	4448718	4436767	9606.ENSP00000414109	9606.ENSP00000288207	0	0	0	0	0.9	0	0	0.196	0.916
TOP2A	MCM4	4448614	4435007	9606.ENSP00000411532	9606.ENSP00000262105	0	0	0	0	0.846	0.05	0	0.471	0.916
ADH1C	ADH1A	4449347	4432830	9606.ENSP00000426083	9606.ENSP00000209668	0	0	0.449	0.985	0.182	0	0.9	0.86	0.916
PTH1R	ADCY1	4439492	4437392	9606.ENSP00000321999	9606.ENSP00000297323	0	0	0	0	0.077	0.092	0.9	0.119	0.916
GPC3	IGFBP3	4446259	4445494	9606.ENSP00000377836	9606.ENSP00000370473	0	0	0	0	0.096	0	0.9	0.155	0.916
KMO	ACMSD	4442693	4441832	9606.ENSP00000355517	9606.ENSP00000348459	0.185	0	0.296	0	0.15	0	0	0.847	0.915
CP	SPP2	4435459	4432703	9606.ENSP00000264613	9606.ENSP00000168148	0	0	0	0	0.064	0	0.9	0.172	0.915
HJURP	CDC20	4448718	4443940	9606.ENSP00000414109	9606.ENSP00000361540	0	0	0	0	0.889	0	0	0.266	0.915
HAO1	SLC27A2	4445115	4435783	9606.ENSP00000368066	9606.ENSP00000267842	0	0	0	0	0.13	0	0.9	0.108	0.915
G6PD	CAT	4446162	4433793	9606.ENSP00000377192	9606.ENSP00000241052	0	0	0	0	0.115	0.111	0	0.9	0.915
CYP2E1	AKR1B10	4449959	4442268	9606.ENSP00000440689	9606.ENSP00000352584	0	0	0	0	0.061	0	0.9	0.169	0.915
ADAMTS1	CFP	4436609	4434012	9606.ENSP00000284984	9606.ENSP00000247153	0	0	0	0.557	0	0	0.9	0.381	0.915
MYC	FOS	4451407	4438204	9606.ENSP00000479618	9606.ENSP00000306245	0	0	0	0	0.064	0.442	0	0.851	0.915
CNDP1	HAL	4442175	4434837	9606.ENSP00000351682	9606.ENSP00000261208	0.15	0	0	0	0.062	0	0.9	0.068	0.915
CDC20	GINS2	4443940	4434310	9606.ENSP00000361540	9606.ENSP00000253462	0	0	0	0	0.869	0	0	0.381	0.915
C7	C9	4439494	4435259	9606.ENSP00000322061	9606.ENSP00000263408	0	0	0	0.723	0	0	0.9	0.594	0.915
ADH6	AOX1	4446342	4444440	9606.ENSP00000378359	9606.ENSP00000363832	0	0	0	0	0.063	0	0.9	0.165	0.915
CYP2C8	CYP2J2	4443714	4443694	9606.ENSP00000360317	9606.ENSP00000360247	0	0	0.442	0.904	0.077	0	0.9	0.785	0.914
IGFALS	PLG	4448841	4438461	9606.ENSP00000416683	9606.ENSP00000308938	0	0	0	0	0.114	0.099	0.9	0.056	0.914
UHRF1	CCNA2	4451406	4436109	9606.ENSP00000479617	9606.ENSP00000274026	0	0	0	0	0.877	0	0	0.33	0.914
CYP2E1	CYP2A6	4449959	4437722	9606.ENSP00000440689	9606.ENSP00000301141	0	0	0.44	0.94	0.108	0	0.9	0.908	0.914
NEU1	GLA	4444596	4433054	9606.ENSP00000364782	9606.ENSP00000218516	0	0	0	0	0	0	0.9	0.183	0.914
RACGAP1	CCNA2	4448310	4436109	9606.ENSP00000404190	9606.ENSP00000274026	0	0	0	0	0.878	0.085	0	0.296	0.914
EPHX2	EHHADH	4449539	4433550	9606.ENSP00000430269	9606.ENSP00000231887	0	0	0	0	0.083	0.079	0.9	0.112	0.914
IGFBP3	EVA1A	4445494	4433601	9606.ENSP00000370473	9606.ENSP00000233712	0	0	0	0	0.183	0	0.9	0	0.914
AOX1	EHHADH	4444440	4433550	9606.ENSP00000363832	9606.ENSP00000231887	0	0	0	0	0.062	0	0.9	0.159	0.914
RHOB	FAM13A	4436010	4435416	9606.ENSP00000272233	9606.ENSP00000264344	0	0	0	0	0	0.177	0.9	0	0.914
APOA5	GPC3	4450143	4446259	9606.ENSP00000445002	9606.ENSP00000377836	0	0	0	0	0.109	0	0.9	0.114	0.914
FAM83D	TPX2	4451564	4437665	9606.ENSP00000481110	9606.ENSP00000300403	0	0	0	0	0.773	0	0	0.638	0.914
CYP2C19	CYP2J2	4443723	4443694	9606.ENSP00000360372	9606.ENSP00000360247	0	0	0.442	0.899	0.073	0	0.9	0.673	0.913
ACOT12	ACAT1	4437948	4435651	9606.ENSP00000303246	9606.ENSP00000265838	0.073	0	0	0	0.061	0	0.9	0.128	0.913
MT1G	MT1H	4447689	4440195	9606.ENSP00000391397	9606.ENSP00000330587	0	0	0	0.973	0.912	0	0	0.647	0.913
C8A	C7	4442465	4439494	9606.ENSP00000354458	9606.ENSP00000322061	0	0	0	0.775	0.064	0	0.9	0.506	0.913
PON1	CETP	4433224	4432783	9606.ENSP00000222381	9606.ENSP00000200676	0	0	0	0	0	0	0.72	0.703	0.913
CKAP5	CENPM	4449644	4432895	9606.ENSP00000432768	9606.ENSP00000215980	0	0	0	0	0.062	0	0.9	0.154	0.913
CYP2A6	CYP2C9	4437722	4434798	9606.ENSP00000301141	9606.ENSP00000260682	0	0	0.445	0.945	0.108	0	0.9	0.893	0.913
SPP1	STC2	4446370	4435556	9606.ENSP00000378517	9606.ENSP00000265087	0	0	0	0	0	0	0.9	0.171	0.913
COL4A1	ALPL	4444632	4444459	9606.ENSP00000364979	9606.ENSP00000363973	0	0	0	0	0.076	0	0.9	0.141	0.913
AKR1C3	CYP1A2	4445414	4441211	9606.ENSP00000369927	9606.ENSP00000342007	0	0	0	0	0.061	0	0.9	0.15	0.913
PRC1	OIP5	4446249	4433119	9606.ENSP00000377793	9606.ENSP00000220514	0	0	0	0	0.833	0	0	0.502	0.913
ALDH6A1	MLYCD	4450308	4435080	9606.ENSP00000450436	9606.ENSP00000262430	0	0	0	0	0.083	0	0.9	0.134	0.913
AKR1C3	AKR1B10	4445414	4442268	9606.ENSP00000369927	9606.ENSP00000352584	0	0	0.449	0.933	0.102	0	0.9	0.669	0.913
CENPF	AURKA	4442771	4432988	9606.ENSP00000355922	9606.ENSP00000216911	0	0	0	0	0.846	0	0	0.46	0.913
CYP2B6	CYP2C9	4439703	4434798	9606.ENSP00000324648	9606.ENSP00000260682	0	0	0.446	0.945	0.09	0	0.9	0.92	0.912
MAP2K1	VWF	4437859	4434871	9606.ENSP00000302486	9606.ENSP00000261405	0	0	0	0	0	0	0.9	0.165	0.912
CYP2E1	CYP2C8	4449959	4443714	9606.ENSP00000440689	9606.ENSP00000360317	0	0	0.444	0.96	0.113	0	0.9	0.798	0.912
CYP2C19	CYP2C8	4443723	4443714	9606.ENSP00000360372	9606.ENSP00000360317	0	0	0.449	0.98	0.137	0	0.9	0.92	0.912
PTGS2	CYP4A11	4442894	4438655	9606.ENSP00000356438	9606.ENSP00000311095	0	0	0	0	0.05	0	0.9	0.149	0.912
AOX1	CYP3A5	4444440	4433259	9606.ENSP00000363832	9606.ENSP00000222982	0	0	0	0	0.088	0	0.9	0.114	0.912
AOX1	CYP26A1	4444440	4433297	9606.ENSP00000363832	9606.ENSP00000224356	0	0	0	0	0.049	0	0.9	0.149	0.912
GPC3	SERPINA10	4446259	4434989	9606.ENSP00000377836	9606.ENSP00000261994	0	0	0	0	0	0	0.9	0.158	0.912
SLC27A2	CAT	4435783	4433793	9606.ENSP00000267842	9606.ENSP00000241052	0	0	0	0	0.063	0	0.9	0.136	0.912
GCGR	PTH1R	4447027	4439492	9606.ENSP00000383558	9606.ENSP00000321999	0	0	0	0.806	0.063	0	0.9	0.568	0.912
CYP2J2	CYP2C9	4443694	4434798	9606.ENSP00000360247	9606.ENSP00000260682	0	0	0.443	0.896	0.049	0	0.9	0.733	0.912
KIF2C	MELK	4443901	4437455	9606.ENSP00000361298	9606.ENSP00000298048	0	0	0	0	0.848	0	0	0.44	0.911
ABAT	AOX1	4446571	4444440	9606.ENSP00000379845	9606.ENSP00000363832	0	0	0	0	0.063	0	0.9	0.133	0.911
APOA5	SERPINA10	4450143	4434989	9606.ENSP00000445002	9606.ENSP00000261994	0	0	0	0	0.129	0	0.9	0.065	0.911
CYR61	GPC3	4448043	4446259	9606.ENSP00000398736	9606.ENSP00000377836	0	0	0	0	0.07	0	0.9	0.124	0.911
SNRPB	PRCC	4448654	4435980	9606.ENSP00000412566	9606.ENSP00000271526	0	0	0	0	0.149	0	0.9	0	0.911
GNMT	AGXT2	4444029	4433532	9606.ENSP00000361894	9606.ENSP00000231420	0	0	0	0	0.086	0	0.9	0.108	0.911
CYP2B6	CYP2A6	4439703	4437722	9606.ENSP00000324648	9606.ENSP00000301141	0	0	0.445	0.952	0.089	0	0.9	0.92	0.911
F11	KLKB1	4447185	4435478	9606.ENSP00000384957	9606.ENSP00000264690	0	0	0.436	0.963	0.115	0	0.9	0.734	0.911
FCN2	FCN3	4436933	4435966	9606.ENSP00000291744	9606.ENSP00000270879	0	0	0	0.934	0.099	0	0.9	0.917	0.911
NUP62	AURKB	4450981	4438898	9606.ENSP00000471191	9606.ENSP00000313950	0	0	0	0	0.098	0	0.9	0.093	0.911
CYP2C19	CYP2B6	4443723	4439703	9606.ENSP00000360372	9606.ENSP00000324648	0	0	0.446	0.944	0.083	0	0.9	0.92	0.911
APOA5	SPP2	4450143	4432703	9606.ENSP00000445002	9606.ENSP00000168148	0	0	0	0	0.153	0	0.9	0	0.911
CYP2E1	CYP2J2	4449959	4443694	9606.ENSP00000440689	9606.ENSP00000360247	0	0	0.437	0.898	0.063	0	0.9	0.595	0.911
AMDHD1	HAL	4435729	4434837	9606.ENSP00000266736	9606.ENSP00000261208	0.219	0.377	0.448	0	0.132	0	0	0.678	0.911
EPHX2	SLC27A2	4449539	4435783	9606.ENSP00000430269	9606.ENSP00000267842	0	0	0	0	0.081	0.084	0.9	0.075	0.911
MUC13	ST6GAL1	4451907	4432706	9606.ENSP00000485028	9606.ENSP00000169298	0	0	0	0	0	0	0.9	0.146	0.911
ALDH3A1	CNDP1	4448623	4442175	9606.ENSP00000411821	9606.ENSP00000351682	0.044	0	0	0	0	0	0.9	0.14	0.91
PRC1	CDKN3	4446249	4440665	9606.ENSP00000377793	9606.ENSP00000335357	0	0	0	0	0.819	0.267	0	0.376	0.91
FOXO1	G6PC	4445233	4434327	9606.ENSP00000368880	9606.ENSP00000253801	0	0	0	0	0	0.379	0	0.862	0.91
CYP2E1	CYP2C9	4449959	4434798	9606.ENSP00000440689	9606.ENSP00000260682	0	0	0.444	0.961	0.099	0	0.9	0.895	0.91
IDO2	CYP1A2	4450084	4441211	9606.ENSP00000443432	9606.ENSP00000342007	0	0	0	0	0.107	0	0.9	0.083	0.91
AURKB	MCM5	4438898	4432914	9606.ENSP00000313950	9606.ENSP00000216122	0	0	0	0	0.872	0	0	0.324	0.91
CYP2J2	CYP2B6	4443694	4439703	9606.ENSP00000360247	9606.ENSP00000324648	0	0	0.436	0.908	0.049	0	0.9	0.669	0.91
CYP2E1	CYP2B6	4449959	4439703	9606.ENSP00000440689	9606.ENSP00000324648	0	0	0.441	0.936	0.064	0	0.9	0.892	0.91
COLEC11	COLEC10	4448620	4440388	9606.ENSP00000411770	9606.ENSP00000332723	0	0	0.439	0.937	0.064	0	0.9	0.931	0.91
GBP2	EGR1	4443541	4433758	9606.ENSP00000359497	9606.ENSP00000239938	0	0	0	0	0.062	0.06	0.9	0.105	0.91
RACGAP1	TPX2	4448310	4437665	9606.ENSP00000404190	9606.ENSP00000300403	0	0	0	0	0.867	0	0	0.354	0.91
CYP4A11	CYP4F2	4438655	4433177	9606.ENSP00000311095	9606.ENSP00000221700	0	0	0.448	0.913	0	0	0.9	0.813	0.91
APOA5	CP	4450143	4435459	9606.ENSP00000445002	9606.ENSP00000264613	0	0	0	0	0.116	0	0.9	0.071	0.91
GCH1	ALPL	4449007	4444459	9606.ENSP00000419045	9606.ENSP00000363973	0	0	0	0	0	0	0.9	0.14	0.91
GPSM2	CXCL12	4447241	4446453	9606.ENSP00000385510	9606.ENSP00000379140	0	0	0	0	0	0	0.9	0.128	0.909
SLC2A5	SLC27A2	4444888	4435783	9606.ENSP00000366641	9606.ENSP00000267842	0	0	0	0	0.064	0	0.9	0.107	0.909
CKAP5	CENPN	4449644	4446136	9606.ENSP00000432768	9606.ENSP00000377007	0	0	0	0	0.107	0	0.9	0.063	0.909
SF3B4	PRCC	4435985	4435980	9606.ENSP00000271628	9606.ENSP00000271526	0	0	0	0	0.129	0	0.9	0	0.909
CYR61	CKAP4	4448043	4444990	9606.ENSP00000398736	9606.ENSP00000367265	0	0	0	0	0.097	0	0.9	0.075	0.909
XDH	NAT2	4445208	4436677	9606.ENSP00000368727	9606.ENSP00000286479	0	0	0	0	0.102	0	0.9	0.072	0.909
ALDH2	ADH1A	4434937	4432830	9606.ENSP00000261733	9606.ENSP00000209668	0.048	0	0	0	0.135	0	0.65	0.724	0.909
ACSM5	ACADS	4439963	4433826	9606.ENSP00000327916	9606.ENSP00000242592	0	0.009	0	0	0.064	0	0.9	0.108	0.909
CYP4A11	CYP4F3	4438655	4433149	9606.ENSP00000311095	9606.ENSP00000221307	0	0	0.447	0.914	0	0	0.9	0.758	0.909
GCGR	VIPR1	4447027	4439908	9606.ENSP00000383558	9606.ENSP00000327246	0	0	0	0.856	0.063	0	0.9	0.504	0.909
STC2	EVA1A	4435556	4433601	9606.ENSP00000265087	9606.ENSP00000233712	0	0	0	0	0.127	0	0.9	0	0.908
CYP2E1	AKR1C3	4449959	4445414	9606.ENSP00000440689	9606.ENSP00000369927	0	0	0	0	0.062	0	0.9	0.107	0.908
CNDP1	ALDH2	4442175	4434937	9606.ENSP00000351682	9606.ENSP00000261733	0.044	0	0	0	0.069	0	0.9	0.098	0.908
HJURP	MELK	4448718	4437455	9606.ENSP00000414109	9606.ENSP00000298048	0	0	0	0	0.842	0	0	0.444	0.908
GPC3	STC2	4446259	4435556	9606.ENSP00000377836	9606.ENSP00000265087	0	0	0	0	0.077	0	0.9	0.089	0.908
NUP62	CCNB2	4450981	4436767	9606.ENSP00000471191	9606.ENSP00000288207	0	0	0	0	0.097	0	0.9	0.068	0.908
LDHD	OTC	4437622	4432619	9606.ENSP00000300051	9606.ENSP00000039007	0	0	0	0	0.062	0	0.9	0.102	0.908
CYP2C8	CYP2B6	4443714	4439703	9606.ENSP00000360317	9606.ENSP00000324648	0	0	0.446	0.947	0.056	0	0.9	0.86	0.908
MELK	OIP5	4437455	4433119	9606.ENSP00000298048	9606.ENSP00000220514	0	0	0	0	0.894	0	0	0.163	0.908
CDC20	CDKN3	4443940	4440665	9606.ENSP00000361540	9606.ENSP00000335357	0	0	0	0	0.825	0.161	0	0.427	0.908
AOX1	CYP2C18	4444440	4436654	9606.ENSP00000363832	9606.ENSP00000285979	0	0	0	0	0.064	0	0.9	0.104	0.908
SPP1	SPP2	4446370	4432703	9606.ENSP00000378517	9606.ENSP00000168148	0	0	0	0	0	0	0.9	0.112	0.907
IGFBP1	EVA1A	4436188	4433601	9606.ENSP00000275525	9606.ENSP00000233712	0	0	0	0	0.111	0	0.9	0	0.907
NUP62	CDCA8	4450981	4444097	9606.ENSP00000471191	9606.ENSP00000362146	0	0	0	0	0.112	0	0.9	0	0.907
IGFBP3	CP	4445494	4435459	9606.ENSP00000370473	9606.ENSP00000264613	0	0	0	0	0.076	0	0.9	0.076	0.907
AKR1B10	GLA	4442268	4433054	9606.ENSP00000352584	9606.ENSP00000218516	0	0	0	0	0	0	0.9	0.111	0.907
XDH	CYP1A2	4445208	4441211	9606.ENSP00000368727	9606.ENSP00000342007	0	0	0	0	0.061	0	0.9	0.096	0.907
NUP62	TOP2A	4450981	4448614	9606.ENSP00000471191	9606.ENSP00000411532	0	0	0	0	0.093	0	0.9	0.063	0.907
ABAT	EHHADH	4446571	4433550	9606.ENSP00000379845	9606.ENSP00000231887	0	0	0	0	0.061	0	0.9	0.096	0.907
CDKN3	NCAPG	4440665	4434176	9606.ENSP00000335357	9606.ENSP00000251496	0	0	0	0	0.904	0.053	0	0.058	0.907
C8B	C7	4443704	4439494	9606.ENSP00000360281	9606.ENSP00000322061	0	0	0	0.74	0.061	0	0.9	0.237	0.907
AOX1	CYP4A11	4444440	4438655	9606.ENSP00000363832	9606.ENSP00000311095	0	0	0	0	0.066	0	0.9	0.084	0.907
ARG1	CFP	4441926	4434012	9606.ENSP00000349446	9606.ENSP00000247153	0	0	0	0	0.076	0	0.9	0.077	0.907
PRC1	MCM7	4446249	4438312	9606.ENSP00000377793	9606.ENSP00000307288	0	0	0	0	0.902	0	0	0.094	0.907
HBB	CFP	4440511	4434012	9606.ENSP00000333994	9606.ENSP00000247153	0	0	0	0	0.076	0	0.9	0.073	0.906
MAN1C1	COG2	4444371	4442720	9606.ENSP00000363452	9606.ENSP00000355629	0	0	0	0	0	0	0.9	0.108	0.906
HJURP	CDCA8	4448718	4444097	9606.ENSP00000414109	9606.ENSP00000362146	0	0	0	0	0.891	0	0	0.172	0.906
CDC20	UBE2Q1	4443940	4436953	9606.ENSP00000361540	9606.ENSP00000292211	0	0	0	0	0.064	0	0.9	0.086	0.906
HJURP	ASPM	4448718	4442873	9606.ENSP00000414109	9606.ENSP00000356379	0	0	0	0	0.893	0	0	0.163	0.906
CYP2E1	CYP2C19	4449959	4443723	9606.ENSP00000440689	9606.ENSP00000360372	0	0	0.444	0.963	0.064	0	0.9	0.87	0.906
NEDD4L	UBE2Q1	4446996	4436953	9606.ENSP00000383199	9606.ENSP00000292211	0	0	0	0	0	0	0.9	0.089	0.905
CKAP4	EVA1A	4444990	4433601	9606.ENSP00000367265	9606.ENSP00000233712	0	0	0	0	0.098	0	0.9	0	0.905
CKAP4	VNN1	4444990	4442984	9606.ENSP00000367265	9606.ENSP00000356905	0	0	0	0	0	0	0.9	0.092	0.905
MCM3	RACGAP1	4451546	4448310	9606.ENSP00000480987	9606.ENSP00000404190	0	0	0	0	0.897	0	0	0.117	0.905
CP	SERPINA10	4435459	4434989	9606.ENSP00000264613	9606.ENSP00000261994	0	0	0	0	0.061	0	0.9	0.073	0.905
MCM3	CCNB2	4451546	4436767	9606.ENSP00000480987	9606.ENSP00000288207	0	0	0	0	0.768	0.182	0	0.541	0.905
IRF8	MT2A	4435834	4433922	9606.ENSP00000268638	9606.ENSP00000245185	0	0	0	0	0	0	0.9	0.09	0.905
NCAPD2	MCM7	4439733	4438312	9606.ENSP00000325017	9606.ENSP00000307288	0	0	0	0	0.877	0	0	0.255	0.905
APOA5	EVA1A	4450143	4433601	9606.ENSP00000445002	9606.ENSP00000233712	0	0	0	0	0.094	0	0.9	0	0.905
CTSA	ANXA2	4443947	4441580	9606.ENSP00000361562	9606.ENSP00000346032	0	0	0	0	0	0	0.9	0.094	0.905
ALPL	VNN1	4444459	4442984	9606.ENSP00000363973	9606.ENSP00000356905	0	0	0	0	0.061	0	0.9	0.078	0.905
ASPM	MCM5	4442873	4432914	9606.ENSP00000356379	9606.ENSP00000216122	0	0	0	0	0.861	0.085	0	0.306	0.904
VIPR1	PTH1R	4439908	4439492	9606.ENSP00000327246	9606.ENSP00000321999	0	0	0	0.871	0	0	0.9	0.377	0.904
ARG1	ANXA2	4441926	4441580	9606.ENSP00000349446	9606.ENSP00000346032	0	0	0	0	0	0	0.9	0.085	0.904
PDE7B	ADK	4438618	4436683	9606.ENSP00000310661	9606.ENSP00000286621	0	0	0	0	0	0	0.9	0.082	0.904
PLAC8	ANXA2	4448082	4441580	9606.ENSP00000399700	9606.ENSP00000346032	0	0	0	0	0.082	0	0.9	0	0.904
CKAP4	STC2	4444990	4435556	9606.ENSP00000367265	9606.ENSP00000265087	0	0	0	0	0.088	0	0.9	0	0.904
PRC1	RHOB	4446249	4436010	9606.ENSP00000377793	9606.ENSP00000272233	0	0	0	0	0.061	0	0.9	0.065	0.904
TK1	MCM5	4437779	4432914	9606.ENSP00000301634	9606.ENSP00000216122	0	0	0	0	0.878	0	0	0.247	0.904
IGFBP1	SPP2	4436188	4432703	9606.ENSP00000275525	9606.ENSP00000168148	0	0	0	0	0.087	0	0.9	0	0.904
CDA	CFP	4444499	4434012	9606.ENSP00000364212	9606.ENSP00000247153	0	0	0	0	0.085	0	0.9	0	0.904
OGDHL	GCDH	4444320	4433208	9606.ENSP00000363216	9606.ENSP00000222214	0.06	0	0	0	0.061	0	0.9	0.05	0.904
IGFBP3	CKAP4	4445494	4444990	9606.ENSP00000370473	9606.ENSP00000367265	0	0	0	0	0.087	0	0.9	0.042	0.904
EPHX2	MPV17	4449539	4445312	9606.ENSP00000430269	9606.ENSP00000369383	0	0	0	0	0.064	0.058	0.9	0.042	0.904
APOA5	IGFBP3	4450143	4445494	9606.ENSP00000445002	9606.ENSP00000370473	0	0	0	0	0.069	0	0.9	0.061	0.904
CDCA8	NCAPD2	4444097	4439733	9606.ENSP00000362146	9606.ENSP00000325017	0	0	0	0	0.875	0	0	0.265	0.904
VNN1	THY1	4442984	4436571	9606.ENSP00000356905	9606.ENSP00000284240	0	0	0	0	0	0	0.9	0.077	0.903
CTSA	ARG1	4443947	4441926	9606.ENSP00000361562	9606.ENSP00000349446	0	0	0	0	0	0	0.9	0.075	0.903
ACOT12	ALDH2	4437948	4434937	9606.ENSP00000303246	9606.ENSP00000261733	0	0	0	0	0.061	0	0.9	0.056	0.903
LCN2	CFP	4444080	4434012	9606.ENSP00000362108	9606.ENSP00000247153	0	0	0	0	0	0	0.9	0.074	0.903
MPV17	EHHADH	4445312	4433550	9606.ENSP00000369383	9606.ENSP00000231887	0	0	0	0	0.061	0	0.9	0.05	0.903
CITED2	PPARGC1A	4450108	4435507	9606.ENSP00000444198	9606.ENSP00000264867	0	0	0	0	0	0	0.9	0.071	0.903
GPC3	CP	4446259	4435459	9606.ENSP00000377836	9606.ENSP00000264613	0	0	0	0	0.064	0	0.9	0.053	0.903
AADAT	OGDHL	4449239	4444320	9606.ENSP00000423190	9606.ENSP00000363216	0	0	0	0	0.061	0	0.9	0.05	0.903
RDH16	RBP5	4446780	4435712	9606.ENSP00000381206	9606.ENSP00000266560	0	0	0	0	0	0	0.9	0.077	0.903
GBP2	MT2A	4443541	4433922	9606.ENSP00000359497	9606.ENSP00000245185	0	0	0	0	0	0	0.9	0.074	0.903
IGFBP3	SERPINA10	4445494	4434989	9606.ENSP00000370473	9606.ENSP00000261994	0	0	0	0	0	0	0.9	0.073	0.903
IGFBP1	SERPINA10	4436188	4434989	9606.ENSP00000275525	9606.ENSP00000261994	0	0	0	0	0.063	0	0.9	0.048	0.903
CXCL12	ADCY1	4446453	4437392	9606.ENSP00000379140	9606.ENSP00000297323	0	0	0	0	0	0	0.9	0.065	0.902
KIF4A	CENPF	4444386	4442771	9606.ENSP00000363524	9606.ENSP00000355922	0	0	0	0	0.837	0	0	0.423	0.902
UBE2C	NCAPG	4441865	4434176	9606.ENSP00000348838	9606.ENSP00000251496	0	0	0	0	0.864	0	0	0.312	0.902
PLAC8	CTSA	4448082	4443947	9606.ENSP00000399700	9606.ENSP00000361562	0	0	0	0	0.061	0	0.9	0	0.902
ARG1	GLA	4441926	4433054	9606.ENSP00000349446	9606.ENSP00000218516	0	0	0	0	0.061	0	0.9	0	0.902
PRC1	KIF2C	4446249	4443901	9606.ENSP00000377793	9606.ENSP00000361298	0	0	0	0	0.839	0.182	0	0.318	0.902
EVA1A	SPP2	4433601	4432703	9606.ENSP00000233712	9606.ENSP00000168148	0	0	0	0	0.063	0	0.9	0	0.902
LSM4	PRCC	4450918	4435980	9606.ENSP00000469468	9606.ENSP00000271526	0	0	0	0	0.064	0	0.9	0	0.902
GPC3	SPP2	4446259	4432703	9606.ENSP00000377836	9606.ENSP00000168148	0	0	0	0	0	0	0.9	0.066	0.902
UHRF1	AURKB	4451406	4438898	9606.ENSP00000479617	9606.ENSP00000313950	0	0	0	0	0.881	0	0	0.215	0.902
MPV17	HAO1	4445312	4445115	9606.ENSP00000369383	9606.ENSP00000368066	0	0	0	0	0.063	0	0.9	0	0.902
PRC1	MCM5	4446249	4432914	9606.ENSP00000377793	9606.ENSP00000216122	0	0	0	0	0.898	0	0	0.082	0.902
CP	EVA1A	4435459	4433601	9606.ENSP00000264613	9606.ENSP00000233712	0	0	0	0	0.061	0	0.9	0	0.902
CDA	HBB	4444499	4440511	9606.ENSP00000364212	9606.ENSP00000333994	0	0	0	0	0	0	0.9	0.068	0.902
HAO2	MPV17	4451782	4445312	9606.ENSP00000483507	9606.ENSP00000369383	0	0	0	0	0.063	0	0.9	0	0.902
SFN	MAP2K1	4441103	4437859	9606.ENSP00000340989	9606.ENSP00000302486	0	0	0	0	0.059	0	0.9	0.049	0.902
SPP1	CKAP4	4446370	4444990	9606.ENSP00000378517	9606.ENSP00000367265	0	0	0	0	0.057	0	0.9	0	0.901
CCNA2	OIP5	4436109	4433119	9606.ENSP00000274026	9606.ENSP00000220514	0	0	0	0	0.872	0	0	0.255	0.901
XDH	RBP5	4445208	4435712	9606.ENSP00000368727	9606.ENSP00000266560	0	0	0	0	0	0	0.9	0	0.9
ST3GAL6	NOTCH3	4451535	4435256	9606.ENSP00000480884	9606.ENSP00000263388	0	0	0	0	0	0	0.9	0	0.9
CKAP4	CP	4444990	4435459	9606.ENSP00000367265	9606.ENSP00000264613	0	0	0	0	0	0	0.9	0	0.9
SERPINA10	EVA1A	4434989	4433601	9606.ENSP00000261994	9606.ENSP00000233712	0	0	0	0	0	0	0.9	0	0.9
CXCL2	ADCY1	4449392	4437392	9606.ENSP00000427279	9606.ENSP00000297323	0	0	0	0	0	0	0.9	0	0.9
GPC3	EVA1A	4446259	4433601	9606.ENSP00000377836	9606.ENSP00000233712	0	0	0	0	0	0	0.9	0	0.9
GPSM2	CCL20	4447241	4442174	9606.ENSP00000385510	9606.ENSP00000351671	0	0	0	0	0	0	0.9	0	0.9
NUP62	GCKR	4450981	4435486	9606.ENSP00000471191	9606.ENSP00000264717	0	0	0	0	0	0	0.9	0	0.9
APOA5	CYR61	4450143	4448043	9606.ENSP00000445002	9606.ENSP00000398736	0	0	0	0	0	0	0.9	0	0.9
NEU1	ARG1	4444596	4441926	9606.ENSP00000364782	9606.ENSP00000349446	0	0	0	0	0	0	0.9	0	0.9
SPP1	EVA1A	4446370	4433601	9606.ENSP00000378517	9606.ENSP00000233712	0	0	0	0	0	0	0.9	0	0.9
PTP4A1	CCNA2	4443595	4436109	9606.ENSP00000359685	9606.ENSP00000274026	0	0	0	0	0	0	0.9	0	0.9
LY6E	VNN1	4449457	4442984	9606.ENSP00000428572	9606.ENSP00000356905	0	0	0	0	0	0	0.9	0	0.9
SPP1	SERPINA10	4446370	4434989	9606.ENSP00000378517	9606.ENSP00000261994	0	0	0	0	0	0	0.9	0	0.9
APOA5	CKAP4	4450143	4444990	9606.ENSP00000445002	9606.ENSP00000367265	0	0	0	0	0	0	0.9	0	0.9
MPV17	SLC27A2	4445312	4435783	9606.ENSP00000369383	9606.ENSP00000267842	0	0	0	0	0	0	0.9	0	0.9
CKAP4	SPP2	4444990	4432703	9606.ENSP00000367265	9606.ENSP00000168148	0	0	0	0	0	0	0.9	0	0.9
CKAP4	SLC2A5	4444990	4444888	9606.ENSP00000367265	9606.ENSP00000366641	0	0	0	0	0	0	0.9	0	0.9
CYR61	SPP2	4448043	4432703	9606.ENSP00000398736	9606.ENSP00000168148	0	0	0	0	0	0	0.9	0	0.9
CXCL2	GPSM2	4449392	4447241	9606.ENSP00000427279	9606.ENSP00000385510	0	0	0	0	0	0	0.9	0	0.9
APOA5	SPP1	4450143	4446370	9606.ENSP00000445002	9606.ENSP00000378517	0	0	0	0	0	0	0.9	0	0.9
IGFBP3	SPP2	4445494	4432703	9606.ENSP00000370473	9606.ENSP00000168148	0	0	0	0	0	0	0.9	0	0.9
CCL20	ADCY1	4442174	4437392	9606.ENSP00000351671	9606.ENSP00000297323	0	0	0	0	0	0	0.9	0	0.9
CITED2	EHHADH	4450108	4433550	9606.ENSP00000444198	9606.ENSP00000231887	0	0	0	0	0	0	0.9	0	0.9
RUSC1	MAP2K1	4443088	4437859	9606.ENSP00000357336	9606.ENSP00000302486	0	0	0	0	0	0	0.9	0	0.9
NEU1	CFP	4444596	4434012	9606.ENSP00000364782	9606.ENSP00000247153	0	0	0	0	0	0	0.9	0	0.9
ANXA2	GLA	4441580	4433054	9606.ENSP00000346032	9606.ENSP00000218516	0	0	0	0	0	0	0.9	0.042	0.9
CYR61	SERPINA10	4448043	4434989	9606.ENSP00000398736	9606.ENSP00000261994	0	0	0	0	0	0	0.9	0	0.9
APOA5	STC2	4450143	4435556	9606.ENSP00000445002	9606.ENSP00000265087	0	0	0	0	0	0	0.9	0	0.9
CYR61	CP	4448043	4435459	9606.ENSP00000398736	9606.ENSP00000264613	0	0	0	0	0	0	0.9	0	0.9
CKAP4	SERPINA10	4444990	4434989	9606.ENSP00000367265	9606.ENSP00000261994	0	0	0	0	0	0	0.9	0	0.9
RHOB	DEPDC7	4436010	4433792	9606.ENSP00000272233	9606.ENSP00000241051	0	0	0	0	0	0	0.9	0	0.9
PLAC8	ARG1	4448082	4441926	9606.ENSP00000399700	9606.ENSP00000349446	0	0	0	0	0	0	0.9	0.05	0.9
PLAC8	GLA	4448082	4433054	9606.ENSP00000399700	9606.ENSP00000218516	0	0	0	0	0	0	0.9	0	0.9
LIPC	RBP5	4437532	4435712	9606.ENSP00000299022	9606.ENSP00000266560	0	0	0	0	0	0	0.9	0	0.9
GPC3	CKAP4	4446259	4444990	9606.ENSP00000377836	9606.ENSP00000367265	0	0	0	0	0	0	0.9	0	0.9
CKAP4	SLC27A2	4444990	4435783	9606.ENSP00000367265	9606.ENSP00000267842	0	0	0	0	0	0	0.9	0	0.9
STC2	SPP2	4435556	4432703	9606.ENSP00000265087	9606.ENSP00000168148	0	0	0	0	0	0	0.9	0	0.9
LY6E	ALPL	4449457	4444459	9606.ENSP00000428572	9606.ENSP00000363973	0	0	0	0	0	0	0.9	0	0.9
STC2	CP	4435556	4435459	9606.ENSP00000265087	9606.ENSP00000264613	0	0	0	0	0	0	0.9	0	0.9
NEU1	LCN2	4444596	4444080	9606.ENSP00000364782	9606.ENSP00000362108	0	0	0	0	0	0	0.9	0	0.9
STC2	SERPINA10	4435556	4434989	9606.ENSP00000265087	9606.ENSP00000261994	0	0	0	0	0	0	0.9	0	0.9
CKAP4	IGFBP1	4444990	4436188	9606.ENSP00000367265	9606.ENSP00000275525	0	0	0	0	0	0	0.9	0	0.9
TOP2A	CDKN3	4448614	4440665	9606.ENSP00000411532	9606.ENSP00000335357	0	0	0	0	0.874	0	0	0.231	0.899
ALDOB	G6PC	4444463	4434327	9606.ENSP00000363988	9606.ENSP00000253801	0	0	0	0	0.145	0	0.8	0.458	0.899
KIF4A	MCM4	4444386	4435007	9606.ENSP00000363524	9606.ENSP00000262105	0	0	0	0	0.872	0	0	0.246	0.899
CRP	SERPINE1	4434405	4433266	9606.ENSP00000255030	9606.ENSP00000223095	0	0	0	0	0.049	0	0	0.898	0.899
MCM3	KIF4A	4451546	4444386	9606.ENSP00000480987	9606.ENSP00000363524	0	0	0	0	0.874	0	0	0.222	0.898
PTTG1	MELK	4446209	4437455	9606.ENSP00000377536	9606.ENSP00000298048	0	0	0	0	0.858	0	0	0.312	0.898
NCAPG	OIP5	4434176	4433119	9606.ENSP00000251496	9606.ENSP00000220514	0	0	0	0	0.898	0	0	0	0.898
COG2	LPA	4442720	4439432	9606.ENSP00000355629	9606.ENSP00000321334	0	0	0	0	0	0	0	0.898	0.898
PCK1	G6PC	4439313	4434327	9606.ENSP00000319814	9606.ENSP00000253801	0	0	0	0	0.164	0	0	0.882	0.897
G6PD	ALDOB	4446162	4444463	9606.ENSP00000377192	9606.ENSP00000363988	0	0	0	0	0.077	0	0.8	0.491	0.897
TXNRD1	CAT	4449713	4433793	9606.ENSP00000434516	9606.ENSP00000241052	0.142	0	0	0	0.188	0.323	0	0.806	0.896
RACGAP1	ASPM	4448310	4442873	9606.ENSP00000404190	9606.ENSP00000356379	0	0	0	0	0.881	0	0	0.167	0.896
AURKB	MCM2	4438898	4435544	9606.ENSP00000313950	9606.ENSP00000265056	0	0	0	0	0.83	0	0	0.414	0.896
G6PD	HKDC1	4446162	4441643	9606.ENSP00000377192	9606.ENSP00000346643	0	0	0	0	0.064	0	0.8	0.486	0.895
HMMR	UBE2C	4446202	4441865	9606.ENSP00000377492	9606.ENSP00000348838	0	0	0	0	0.83	0	0	0.404	0.894
AURKB	FEN1	4438898	4438133	9606.ENSP00000313950	9606.ENSP00000305480	0	0	0	0	0.868	0	0	0.225	0.893
CCNB2	MCM5	4436767	4432914	9606.ENSP00000288207	9606.ENSP00000216122	0	0	0	0	0.763	0.182	0	0.493	0.893
UHRF1	CDCA8	4451406	4444097	9606.ENSP00000479617	9606.ENSP00000362146	0	0	0	0	0.879	0	0	0.145	0.892
PRC1	CDCA8	4446249	4444097	9606.ENSP00000377793	9606.ENSP00000362146	0	0	0	0	0.882	0	0	0.124	0.892
NUSAP1	RACGAP1	4450429	4448310	9606.ENSP00000453403	9606.ENSP00000404190	0	0	0	0	0.842	0	0	0.348	0.892
HAO1	AGXT2	4445115	4433532	9606.ENSP00000368066	9606.ENSP00000231420	0	0	0	0	0.265	0	0.8	0.329	0.892
HAO2	AGXT2	4451782	4433532	9606.ENSP00000483507	9606.ENSP00000231420	0	0	0	0	0.424	0	0.8	0.131	0.891
CDKN3	AURKB	4440665	4438898	9606.ENSP00000335357	9606.ENSP00000313950	0	0	0	0	0.805	0.194	0	0.365	0.891
FAM83D	KIF4A	4451564	4444386	9606.ENSP00000481110	9606.ENSP00000363524	0	0	0	0	0.66	0	0	0.694	0.891
MCM6	AURKA	4435383	4432988	9606.ENSP00000264156	9606.ENSP00000216911	0	0	0	0	0.834	0	0	0.365	0.89
PTTG1	KIF4A	4446209	4444386	9606.ENSP00000377536	9606.ENSP00000363524	0	0	0	0	0.79	0	0	0.495	0.889
CENPN	CCNA2	4446136	4436109	9606.ENSP00000377007	9606.ENSP00000274026	0	0	0	0	0.866	0	0	0.206	0.889
AURKB	TRIP13	4438898	4432699	9606.ENSP00000313950	9606.ENSP00000166345	0	0	0	0	0.859	0	0	0.248	0.889
PTTG1	ASPM	4446209	4442873	9606.ENSP00000377536	9606.ENSP00000356379	0	0	0	0	0.844	0	0	0.316	0.889
TOP2A	FEN1	4448614	4438133	9606.ENSP00000411532	9606.ENSP00000305480	0.046	0	0	0	0.788	0.05	0	0.485	0.888
RACGAP1	NCAPG	4448310	4434176	9606.ENSP00000404190	9606.ENSP00000251496	0	0	0	0	0.852	0	0	0.27	0.888
ALDH3A1	ADH1B	4448623	4438237	9606.ENSP00000411821	9606.ENSP00000306606	0.048	0	0	0	0.063	0	0.65	0.686	0.888
ADH1C	ALDH3A1	4449347	4448623	9606.ENSP00000426083	9606.ENSP00000411821	0.048	0	0	0	0.063	0	0.65	0.686	0.888
AURKB	MELK	4438898	4437455	9606.ENSP00000313950	9606.ENSP00000298048	0	0	0	0.742	0.872	0	0	0.502	0.887
RACGAP1	MCM4	4448310	4435007	9606.ENSP00000404190	9606.ENSP00000262105	0	0	0	0	0.885	0	0	0.056	0.887
PRC1	MELK	4446249	4437455	9606.ENSP00000377793	9606.ENSP00000298048	0	0	0	0	0.858	0.178	0	0.109	0.887
KIF20A	HMMR	4446341	4446202	9606.ENSP00000378356	9606.ENSP00000377492	0	0	0	0	0.845	0	0	0.302	0.887
ZFP36	FOS	4450924	4438204	9606.ENSP00000469647	9606.ENSP00000306245	0	0	0	0	0.793	0	0	0.477	0.887
UBE2C	CDCA5	4441865	4436187	9606.ENSP00000348838	9606.ENSP00000275517	0	0	0	0	0.785	0	0	0.491	0.886
MCM3	UHRF1	4451546	4451406	9606.ENSP00000480987	9606.ENSP00000479617	0	0	0	0	0.805	0.365	0	0.144	0.885
HJURP	TPX2	4448718	4437665	9606.ENSP00000414109	9606.ENSP00000300403	0	0	0	0	0.86	0	0	0.212	0.885
PRC1	MCM2	4446249	4435544	9606.ENSP00000377793	9606.ENSP00000265056	0	0	0	0	0.868	0	0	0.165	0.885
CCNA2	GINS2	4436109	4434310	9606.ENSP00000274026	9606.ENSP00000253462	0	0	0	0	0.856	0.058	0	0.22	0.885
CCNB2	TRIP13	4436767	4432699	9606.ENSP00000288207	9606.ENSP00000166345	0	0	0	0	0.835	0.165	0	0.232	0.885
MCM2	AURKA	4435544	4432988	9606.ENSP00000265056	9606.ENSP00000216911	0	0	0	0	0.812	0	0	0.414	0.885
WDR72	FAM83H	4446532	4445803	9606.ENSP00000379619	9606.ENSP00000373565	0	0	0	0	0	0	0	0.884	0.884
RACGAP1	HMMR	4448310	4446202	9606.ENSP00000404190	9606.ENSP00000377492	0	0	0	0	0.804	0	0	0.432	0.884
HMMR	CCNB2	4446202	4436767	9606.ENSP00000377492	9606.ENSP00000288207	0	0	0	0	0.83	0	0	0.346	0.884
PRC1	HMMR	4446249	4446202	9606.ENSP00000377793	9606.ENSP00000377492	0	0	0	0	0.826	0	0	0.364	0.884
MCM2	NCAPG	4435544	4434176	9606.ENSP00000265056	9606.ENSP00000251496	0	0	0	0	0.845	0	0	0.286	0.884
HJURP	NCAPG	4448718	4434176	9606.ENSP00000414109	9606.ENSP00000251496	0	0	0	0	0.835	0	0	0.322	0.883
PRC1	PTTG1	4446249	4446209	9606.ENSP00000377793	9606.ENSP00000377536	0	0	0	0	0.824	0	0	0.363	0.883
HMMR	CDC20	4446202	4443940	9606.ENSP00000377492	9606.ENSP00000361540	0	0	0	0	0.824	0	0	0.359	0.882
HMMR	MELK	4446202	4437455	9606.ENSP00000377492	9606.ENSP00000298048	0	0	0	0	0.845	0	0	0.271	0.882
APOA5	LCAT	4450143	4435353	9606.ENSP00000445002	9606.ENSP00000264005	0	0	0	0	0.084	0	0.72	0.571	0.88
AURKA	TRIP13	4432988	4432699	9606.ENSP00000216911	9606.ENSP00000166345	0	0	0	0	0.859	0	0	0.186	0.88
HMMR	CCNA2	4446202	4436109	9606.ENSP00000377492	9606.ENSP00000274026	0	0	0	0	0.837	0	0	0.295	0.88
CDKN3	OIP5	4440665	4433119	9606.ENSP00000335357	9606.ENSP00000220514	0	0	0	0	0.88	0	0	0	0.88
TDO2	TAT	4450131	4441813	9606.ENSP00000444788	9606.ENSP00000348234	0.045	0	0	0	0.195	0	0	0.856	0.879
ASPM	FOXM1	4442873	4441245	9606.ENSP00000356379	9606.ENSP00000342307	0	0	0	0	0.871	0	0	0.1	0.879
ADH6	ALDH2	4446342	4434937	9606.ENSP00000378359	9606.ENSP00000261733	0.048	0	0	0	0.063	0	0.65	0.658	0.879
TOP2A	ATAD2	4448614	4436722	9606.ENSP00000411532	9606.ENSP00000287394	0.051	0	0	0	0.788	0.264	0	0.278	0.879
KIF4A	MCM5	4444386	4432914	9606.ENSP00000363524	9606.ENSP00000216122	0	0	0	0	0.86	0	0	0.169	0.879
NCAPD2	MCM5	4439733	4432914	9606.ENSP00000325017	9606.ENSP00000216122	0	0	0	0	0.844	0	0	0.249	0.878
PTTG1	UBE2T	4446209	4442849	9606.ENSP00000377536	9606.ENSP00000356243	0	0	0	0	0.84	0	0	0.268	0.877
ALDH3A1	ADH1A	4448623	4432830	9606.ENSP00000411821	9606.ENSP00000209668	0.048	0	0	0	0.063	0	0.65	0.654	0.877
FEN1	AURKA	4438133	4432988	9606.ENSP00000305480	9606.ENSP00000216911	0	0	0	0	0.854	0	0	0.18	0.876
NUSAP1	CENPM	4450429	4432895	9606.ENSP00000453403	9606.ENSP00000215980	0	0	0	0	0.808	0	0	0.382	0.876
GINS2	TRIP13	4434310	4432699	9606.ENSP00000253462	9606.ENSP00000166345	0	0	0	0	0.858	0	0	0.162	0.876
MCM3	PRC1	4451546	4446249	9606.ENSP00000480987	9606.ENSP00000377793	0	0	0	0	0.87	0	0	0.082	0.876
ACADM	ALDH2	4443625	4434937	9606.ENSP00000359871	9606.ENSP00000261733	0.044	0	0	0	0.063	0	0.8	0.385	0.875
CCNB2	MCM6	4436767	4435383	9606.ENSP00000288207	9606.ENSP00000264156	0	0	0	0	0.713	0.188	0	0.507	0.875
ATF3	EGR1	4441415	4433758	9606.ENSP00000344352	9606.ENSP00000239938	0	0	0	0	0.26	0.073	0	0.831	0.874
CDCA8	TRIP13	4444097	4432699	9606.ENSP00000362146	9606.ENSP00000166345	0	0	0	0	0.832	0	0	0.284	0.874
HMMR	KIF4A	4446202	4444386	9606.ENSP00000377492	9606.ENSP00000363524	0	0	0	0	0.836	0	0	0.258	0.873
ASS1	FTCD	4443929	4436927	9606.ENSP00000361471	9606.ENSP00000291670	0	0	0	0	0.086	0	0.8	0.365	0.873
BGN	COL1A1	4439914	4433346	9606.ENSP00000327336	9606.ENSP00000225964	0	0	0	0	0.466	0.405	0	0.632	0.873
BHMT	SDS	4436127	4434551	9606.ENSP00000274353	9606.ENSP00000257549	0.068	0	0	0	0.083	0	0.8	0.344	0.872
NCAPG	POLE2	4434176	4432952	9606.ENSP00000251496	9606.ENSP00000216367	0	0	0	0	0.859	0	0	0.125	0.872
PLG	KLKB1	4438461	4435478	9606.ENSP00000308938	9606.ENSP00000264690	0	0	0	0.641	0.189	0	0.8	0.696	0.872
TOP2A	NCAPD2	4448614	4439733	9606.ENSP00000411532	9606.ENSP00000325017	0	0	0	0	0.807	0	0	0.361	0.871
KIF2C	OIP5	4443901	4433119	9606.ENSP00000361298	9606.ENSP00000220514	0	0	0	0	0.832	0	0	0.267	0.871
MCM4	AURKA	4435007	4432988	9606.ENSP00000262105	9606.ENSP00000216911	0	0	0	0	0.806	0	0	0.362	0.871
HMMR	OIP5	4446202	4433119	9606.ENSP00000377492	9606.ENSP00000220514	0	0	0	0	0.829	0	0	0.277	0.871
CDCA5	CCNA2	4436187	4436109	9606.ENSP00000275517	9606.ENSP00000274026	0	0	0	0	0.806	0	0	0.358	0.87
MCM2	RNASEH2A	4435544	4433165	9606.ENSP00000265056	9606.ENSP00000221486	0	0	0	0	0.838	0	0	0.23	0.87
HJURP	KIF4A	4448718	4444386	9606.ENSP00000414109	9606.ENSP00000363524	0	0	0	0	0.812	0	0	0.334	0.869
APOA5	LIPC	4450143	4437532	9606.ENSP00000445002	9606.ENSP00000299022	0	0	0	0	0.106	0	0.54	0.707	0.869
NUSAP1	CENPN	4450429	4446136	9606.ENSP00000453403	9606.ENSP00000377007	0	0	0	0	0.8	0	0	0.368	0.868
FOXM1	NCAPG	4441245	4434176	9606.ENSP00000342307	9606.ENSP00000251496	0	0	0	0	0.838	0	0	0.217	0.868
MCM3	NCAPG	4451546	4434176	9606.ENSP00000480987	9606.ENSP00000251496	0	0	0	0	0.86	0	0	0.096	0.868
KIF20A	MCM4	4446341	4435007	9606.ENSP00000378356	9606.ENSP00000262105	0	0	0	0	0.839	0	0	0.218	0.868
LDLR	COG2	4450447	4442720	9606.ENSP00000454071	9606.ENSP00000355629	0	0	0	0	0	0	0	0.866	0.867
NR4A2	FOSB	4441430	4433953	9606.ENSP00000344479	9606.ENSP00000245919	0	0	0	0	0.724	0	0	0.538	0.867
SLCO1B1	SLC10A1	4434521	4432972	9606.ENSP00000256958	9606.ENSP00000216540	0	0	0	0	0.16	0	0	0.849	0.867
CDCA8	GINS2	4444097	4434310	9606.ENSP00000362146	9606.ENSP00000253462	0	0	0	0	0.837	0	0	0.213	0.866
UBE2C	TRIP13	4441865	4432699	9606.ENSP00000348838	9606.ENSP00000166345	0	0	0	0	0.801	0.141	0	0.281	0.866
TPX2	GINS2	4437665	4434310	9606.ENSP00000300403	9606.ENSP00000253462	0	0	0	0	0.791	0	0	0.387	0.866
FEN1	NCAPG	4438133	4434176	9606.ENSP00000305480	9606.ENSP00000251496	0	0	0	0	0.808	0.32	0	0.055	0.866
GOT1	CSAD	4443556	4435740	9606.ENSP00000359539	9606.ENSP00000267085	0	0	0	0	0.061	0	0.8	0.34	0.865
UBE2C	CDKN3	4441865	4440665	9606.ENSP00000348838	9606.ENSP00000335357	0	0	0	0	0.846	0	0	0.157	0.865
PRC1	CENPF	4446249	4442771	9606.ENSP00000377793	9606.ENSP00000355922	0	0	0	0	0.818	0	0	0.288	0.865
CEBPA	SORT1	4449403	4434501	9606.ENSP00000427514	9606.ENSP00000256637	0	0	0	0	0	0	0	0.864	0.864
RACGAP1	UBE2C	4448310	4441865	9606.ENSP00000404190	9606.ENSP00000348838	0	0	0	0	0.81	0	0	0.316	0.864
TOP2A	MCM6	4448614	4435383	9606.ENSP00000411532	9606.ENSP00000264156	0	0	0	0	0.716	0.05	0	0.535	0.864
RACGAP1	PTTG1	4448310	4446209	9606.ENSP00000404190	9606.ENSP00000377536	0	0	0	0	0.798	0	0	0.354	0.864
TOP2A	CENPN	4448614	4446136	9606.ENSP00000411532	9606.ENSP00000377007	0	0	0	0	0.838	0	0	0.195	0.864
CCNB2	GINS2	4436767	4434310	9606.ENSP00000288207	9606.ENSP00000253462	0	0	0	0	0.83	0.064	0	0.216	0.864
LPA	CRP	4439432	4434405	9606.ENSP00000321334	9606.ENSP00000255030	0	0	0	0	0.194	0	0	0.837	0.863
CENPN	AURKA	4446136	4432988	9606.ENSP00000377007	9606.ENSP00000216911	0	0	0	0	0.827	0	0	0.243	0.863
HAO1	C9	4445115	4435259	9606.ENSP00000368066	9606.ENSP00000263408	0	0	0	0	0.863	0	0	0	0.863
NUSAP1	GINS2	4450429	4434310	9606.ENSP00000453403	9606.ENSP00000253462	0	0	0	0	0.811	0	0	0.306	0.863
LDLR	CETP	4450447	4432783	9606.ENSP00000454071	9606.ENSP00000200676	0	0	0	0	0	0	0.54	0.715	0.863
CDKN3	TPX2	4440665	4437665	9606.ENSP00000335357	9606.ENSP00000300403	0	0	0	0	0.843	0	0	0.154	0.862
MELK	TRIP13	4437455	4432699	9606.ENSP00000298048	9606.ENSP00000166345	0	0	0	0	0.842	0	0	0.162	0.862
CCNB2	OIP5	4436767	4433119	9606.ENSP00000288207	9606.ENSP00000220514	0	0	0	0	0.843	0	0	0.156	0.862
HMMR	AURKB	4446202	4438898	9606.ENSP00000377492	9606.ENSP00000313950	0	0	0	0	0.803	0	0	0.328	0.862
CENPN	MELK	4446136	4437455	9606.ENSP00000377007	9606.ENSP00000298048	0	0	0	0	0.837	0	0	0.189	0.862
NCAPG	TRIP13	4434176	4432699	9606.ENSP00000251496	9606.ENSP00000166345	0	0	0	0	0.83	0	0	0.216	0.861
KIF20A	CDKN3	4446341	4440665	9606.ENSP00000378356	9606.ENSP00000335357	0	0	0	0	0.832	0.124	0	0.132	0.861
HJURP	AURKA	4448718	4432988	9606.ENSP00000414109	9606.ENSP00000216911	0	0	0	0	0.835	0	0	0.189	0.861
DAK	GPD1	4446343	4437724	9606.ENSP00000378360	9606.ENSP00000301149	0	0	0	0	0.062	0	0.8	0.319	0.861
APOA5	PON1	4450143	4433224	9606.ENSP00000445002	9606.ENSP00000222381	0	0	0	0	0.173	0	0.72	0.446	0.86
KIF20A	TRIP13	4446341	4432699	9606.ENSP00000378356	9606.ENSP00000166345	0	0	0	0	0.824	0	0	0.231	0.859
KIF20A	CENPN	4446341	4446136	9606.ENSP00000378356	9606.ENSP00000377007	0	0	0	0	0.804	0	0	0.31	0.859
CCNB2	GADD45B	4436767	4432865	9606.ENSP00000288207	9606.ENSP00000215631	0	0	0	0	0	0	0.8	0.327	0.859
CDCA8	CDKN3	4444097	4440665	9606.ENSP00000362146	9606.ENSP00000335357	0	0	0	0	0.814	0	0	0.266	0.858
HJURP	HMMR	4448718	4446202	9606.ENSP00000414109	9606.ENSP00000377492	0	0	0	0	0.811	0	0	0.281	0.858
G6PD	ENO3	4446162	4439661	9606.ENSP00000377192	9606.ENSP00000324105	0.045	0	0	0	0.08	0	0.8	0.288	0.858
MYC	MCL1	4451407	4443243	9606.ENSP00000479618	9606.ENSP00000358022	0	0	0	0	0.065	0.125	0	0.84	0.858
CDCA5	NCAPG	4436187	4434176	9606.ENSP00000275517	9606.ENSP00000251496	0	0	0	0	0.799	0	0	0.319	0.857
TDO2	ACMSD	4450131	4441832	9606.ENSP00000444788	9606.ENSP00000348459	0.177	0	0	0	0.062	0	0	0.829	0.857
FEN1	GINS2	4438133	4434310	9606.ENSP00000305480	9606.ENSP00000253462	0	0	0	0	0.832	0	0	0.182	0.857
SLCO1B3	SLC10A1	4434834	4432972	9606.ENSP00000261196	9606.ENSP00000216540	0	0	0	0	0.141	0	0	0.84	0.857
TOP2A	TK1	4448614	4437779	9606.ENSP00000411532	9606.ENSP00000301634	0	0	0	0	0.722	0	0	0.506	0.857
CENPF	CDKN3	4442771	4440665	9606.ENSP00000355922	9606.ENSP00000335357	0	0	0	0	0.822	0	0	0.223	0.856
CENPF	OIP5	4442771	4433119	9606.ENSP00000355922	9606.ENSP00000220514	0	0	0	0	0.816	0	0	0.248	0.856
CENPN	NCAPG	4446136	4434176	9606.ENSP00000377007	9606.ENSP00000251496	0	0	0	0	0.815	0	0	0.251	0.856
CCNB2	GADD45G	4436767	4434230	9606.ENSP00000288207	9606.ENSP00000252506	0	0	0	0	0	0	0.8	0.31	0.856
UBE2C	GINS2	4441865	4434310	9606.ENSP00000348838	9606.ENSP00000253462	0	0	0	0	0.822	0	0	0.227	0.856
PTTG1	FOXM1	4446209	4441245	9606.ENSP00000377536	9606.ENSP00000342307	0	0	0	0	0.687	0	0	0.561	0.856
GINS2	AURKA	4434310	4432988	9606.ENSP00000253462	9606.ENSP00000216911	0	0	0	0	0.821	0	0	0.226	0.855
AURKB	MCM7	4438898	4438312	9606.ENSP00000313950	9606.ENSP00000307288	0	0	0	0	0.76	0	0	0.422	0.855
NCAPD2	TPX2	4439733	4437665	9606.ENSP00000325017	9606.ENSP00000300403	0	0	0	0	0.803	0	0	0.295	0.855
RACGAP1	OIP5	4448310	4433119	9606.ENSP00000404190	9606.ENSP00000220514	0	0	0	0	0.784	0	0	0.355	0.855
FOSB	DUSP1	4433953	4433734	9606.ENSP00000245919	9606.ENSP00000239223	0	0	0	0	0.676	0.111	0	0.536	0.855
UHRF1	ASPM	4451406	4442873	9606.ENSP00000479617	9606.ENSP00000356379	0	0	0	0	0.83	0	0	0.18	0.854
OIP5	TRIP13	4433119	4432699	9606.ENSP00000220514	9606.ENSP00000166345	0	0	0	0	0.789	0	0	0.333	0.853
HPR	PON1	4450004	4433224	9606.ENSP00000441828	9606.ENSP00000222381	0	0	0	0	0.14	0	0.72	0.442	0.853
HMMR	CDKN3	4446202	4440665	9606.ENSP00000377492	9606.ENSP00000335357	0	0	0	0	0.83	0	0	0.167	0.852
NEDD4L	SFN	4446996	4441103	9606.ENSP00000383199	9606.ENSP00000340989	0	0	0	0	0	0.281	0.8	0.056	0.852
PRC1	FOXM1	4446249	4441245	9606.ENSP00000377793	9606.ENSP00000342307	0	0	0	0	0.813	0.151	0	0.147	0.852
HPR	HBB	4450004	4440511	9606.ENSP00000441828	9606.ENSP00000333994	0	0	0	0	0.06	0.186	0.8	0.15	0.852
CKAP5	EIF2D	4449644	4435994	9606.ENSP00000432768	9606.ENSP00000271764	0	0	0	0	0	0.852	0	0	0.852
ABAT	ACADM	4446571	4443625	9606.ENSP00000379845	9606.ENSP00000359871	0	0	0	0	0.063	0	0.8	0.273	0.852
AURKB	GINS2	4438898	4434310	9606.ENSP00000313950	9606.ENSP00000253462	0	0	0	0	0.826	0	0	0.178	0.851
HJURP	PTTG1	4448718	4446209	9606.ENSP00000414109	9606.ENSP00000377536	0	0	0	0	0.814	0	0	0.229	0.851
CDC20	TK1	4443940	4437779	9606.ENSP00000361540	9606.ENSP00000301634	0	0	0	0	0.644	0.313	0	0.44	0.851
MELK	CDCA5	4437455	4436187	9606.ENSP00000298048	9606.ENSP00000275517	0	0	0	0	0.789	0	0	0.323	0.851
FOXM1	CDKN3	4441245	4440665	9606.ENSP00000342307	9606.ENSP00000335357	0	0	0	0	0.782	0.127	0	0.275	0.85
TPX2	TRIP13	4437665	4432699	9606.ENSP00000300403	9606.ENSP00000166345	0	0	0	0	0.824	0	0	0.182	0.85
KIF20A	CENPM	4446341	4432895	9606.ENSP00000378356	9606.ENSP00000215980	0	0	0	0	0.79	0	0	0.318	0.85
MELK	MCM2	4437455	4435544	9606.ENSP00000298048	9606.ENSP00000265056	0	0	0	0	0.807	0.157	0	0.151	0.85
KIF4A	FOXM1	4444386	4441245	9606.ENSP00000363524	9606.ENSP00000342307	0	0	0	0	0.819	0.05	0	0.198	0.85
PTTG1	CDCA5	4446209	4436187	9606.ENSP00000377536	9606.ENSP00000275517	0	0	0	0	0.738	0	0	0.45	0.849
OGDHL	GOT1	4444320	4443556	9606.ENSP00000363216	9606.ENSP00000359539	0	0	0	0	0.097	0	0.8	0.23	0.848
KIF20A	MCM2	4446341	4435544	9606.ENSP00000378356	9606.ENSP00000265056	0	0	0	0	0.793	0	0	0.293	0.848
TOP2A	CENPM	4448614	4432895	9606.ENSP00000411532	9606.ENSP00000215980	0	0	0	0	0.784	0	0	0.326	0.848
TPX2	MCM4	4437665	4435007	9606.ENSP00000300403	9606.ENSP00000262105	0	0	0	0	0.833	0	0	0.131	0.848
ALDOB	ENO3	4444463	4439661	9606.ENSP00000363988	9606.ENSP00000324105	0	0	0	0	0.228	0.053	0.6	0.544	0.848
LIPC	LCAT	4437532	4435353	9606.ENSP00000299022	9606.ENSP00000264005	0	0	0	0	0.064	0	0.54	0.676	0.848
TKT	ENO3	4447693	4439661	9606.ENSP00000391481	9606.ENSP00000324105	0.042	0	0	0	0.178	0.374	0.6	0.349	0.848
NUSAP1	MCM2	4450429	4435544	9606.ENSP00000453403	9606.ENSP00000265056	0	0	0	0	0.795	0	0	0.29	0.848
MCM7	NCAPG	4438312	4434176	9606.ENSP00000307288	9606.ENSP00000251496	0	0	0	0	0.787	0	0	0.311	0.847
UHRF1	CCNB2	4451406	4436767	9606.ENSP00000479617	9606.ENSP00000288207	0	0	0	0	0.786	0	0	0.313	0.847
ASPM	OIP5	4442873	4433119	9606.ENSP00000356379	9606.ENSP00000220514	0	0	0	0	0.847	0	0	0	0.847
FOSB	EGR2	4433953	4433822	9606.ENSP00000245919	9606.ENSP00000242480	0	0	0	0	0.565	0.073	0	0.648	0.846
NUSAP1	TRIP13	4450429	4432699	9606.ENSP00000453403	9606.ENSP00000166345	0	0	0	0	0.819	0	0	0.185	0.846
GINS2	CENPM	4434310	4432895	9606.ENSP00000253462	9606.ENSP00000215980	0	0	0	0	0.816	0	0	0.195	0.846
TOP2A	TRIP13	4448614	4432699	9606.ENSP00000411532	9606.ENSP00000166345	0	0	0	0	0.804	0.167	0	0.13	0.846
KIF2C	CDKN3	4443901	4440665	9606.ENSP00000361298	9606.ENSP00000335357	0	0	0	0	0.826	0.124	0	0.069	0.846
MELK	MCM4	4437455	4435007	9606.ENSP00000298048	9606.ENSP00000262105	0	0	0	0	0.809	0.085	0	0.186	0.845
LDLR	LCAT	4450447	4435353	9606.ENSP00000454071	9606.ENSP00000264005	0	0	0	0	0	0	0.54	0.678	0.845
MCM3	NUP62	4451546	4450981	9606.ENSP00000480987	9606.ENSP00000471191	0	0	0	0	0.225	0.807	0	0	0.844
MCM3	AURKB	4451546	4438898	9606.ENSP00000480987	9606.ENSP00000313950	0	0	0	0	0.762	0	0	0.37	0.844
UBE2C	MCM2	4441865	4435544	9606.ENSP00000348838	9606.ENSP00000265056	0	0	0	0	0.754	0.11	0	0.34	0.843
HJURP	TRIP13	4448718	4432699	9606.ENSP00000414109	9606.ENSP00000166345	0	0	0	0	0.78	0	0	0.309	0.842
LDLR	APOA5	4450447	4450143	9606.ENSP00000454071	9606.ENSP00000445002	0	0	0	0	0	0	0.54	0.669	0.841
ACADM	ACADS	4443625	4433826	9606.ENSP00000359871	9606.ENSP00000242592	0	0	0.444	0.858	0.082	0	0.8	0.833	0.841
CCNA2	POLE2	4436109	4432952	9606.ENSP00000274026	9606.ENSP00000216367	0	0	0	0	0.782	0	0	0.303	0.841
LDLR	LPA	4450447	4439432	9606.ENSP00000454071	9606.ENSP00000321334	0	0	0	0	0	0	0.54	0.669	0.841
ACADM	AGXT2	4443625	4433532	9606.ENSP00000359871	9606.ENSP00000231420	0	0	0	0	0.062	0	0.8	0.219	0.84
TPX2	MCM2	4437665	4435544	9606.ENSP00000300403	9606.ENSP00000265056	0	0	0	0	0.79	0	0	0.269	0.84
AOX1	ACADM	4444440	4443625	9606.ENSP00000363832	9606.ENSP00000359871	0	0	0	0	0.062	0	0.8	0.215	0.84
FEN1	CCNB2	4438133	4436767	9606.ENSP00000305480	9606.ENSP00000288207	0	0	0	0	0.763	0.157	0	0.263	0.84
RACGAP1	MCM5	4448310	4432914	9606.ENSP00000404190	9606.ENSP00000216122	0	0	0	0	0.829	0	0	0.094	0.839
AURKA	MCM5	4432988	4432914	9606.ENSP00000216911	9606.ENSP00000216122	0	0	0	0	0.778	0	0	0.306	0.839
UBE2T	CENPF	4442849	4442771	9606.ENSP00000356243	9606.ENSP00000355922	0	0	0	0	0.792	0	0	0.256	0.839
GPT2	AGXT2	4441506	4433532	9606.ENSP00000345282	9606.ENSP00000231420	0	0	0	0	0.062	0	0.8	0.211	0.839
SDS	AGXT2	4434551	4433532	9606.ENSP00000257549	9606.ENSP00000231420	0	0	0	0	0.081	0	0.8	0.195	0.839
HSD17B6	HSD17B2	4450358	4432776	9606.ENSP00000451406	9606.ENSP00000199936	0	0	0.238	0.811	0.081	0	0.8	0.688	0.839
COG2	CRP	4442720	4434405	9606.ENSP00000355629	9606.ENSP00000255030	0	0	0	0	0	0	0	0.838	0.838
MCM2	TRIP13	4435544	4432699	9606.ENSP00000265056	9606.ENSP00000166345	0	0	0	0	0.806	0	0	0.2	0.838
HMMR	KIF2C	4446202	4443901	9606.ENSP00000377492	9606.ENSP00000361298	0	0	0	0	0.82	0	0	0.135	0.838
KIF4A	TRIP13	4444386	4432699	9606.ENSP00000363524	9606.ENSP00000166345	0	0	0	0	0.81	0	0	0.18	0.838
KIF4A	CDKN3	4444386	4440665	9606.ENSP00000363524	9606.ENSP00000335357	0	0	0	0	0.809	0.124	0	0.107	0.837
HMMR	CDCA8	4446202	4444097	9606.ENSP00000377492	9606.ENSP00000362146	0	0	0	0	0.81	0	0	0.174	0.836
CDCA8	MCM2	4444097	4435544	9606.ENSP00000362146	9606.ENSP00000265056	0	0	0	0	0.811	0	0	0.169	0.836
KIF2C	GINS2	4443901	4434310	9606.ENSP00000361298	9606.ENSP00000253462	0	0	0	0	0.802	0	0	0.21	0.836
MELK	CENPM	4437455	4432895	9606.ENSP00000298048	9606.ENSP00000215980	0	0	0	0	0.796	0	0	0.223	0.835
TKT	G6PC	4447693	4434327	9606.ENSP00000391481	9606.ENSP00000253801	0	0	0	0	0	0	0.8	0.211	0.835
HMMR	FOXM1	4446202	4441245	9606.ENSP00000377492	9606.ENSP00000342307	0	0	0	0	0.785	0	0	0.266	0.835
RACGAP1	CDCA5	4448310	4436187	9606.ENSP00000404190	9606.ENSP00000275517	0	0	0	0	0.775	0	0	0.294	0.834
KIF2C	MCM2	4443901	4435544	9606.ENSP00000361298	9606.ENSP00000265056	0	0	0	0	0.788	0	0	0.248	0.834
LPA	SERPINE1	4439432	4433266	9606.ENSP00000321334	9606.ENSP00000223095	0	0	0	0	0.063	0.129	0	0.813	0.834
PTTG1	CENPM	4446209	4432895	9606.ENSP00000377536	9606.ENSP00000215980	0	0	0	0	0.769	0	0	0.312	0.834
TOP2A	GINS2	4448614	4434310	9606.ENSP00000411532	9606.ENSP00000253462	0	0	0	0	0.793	0	0	0.228	0.834
PTTG1	GINS2	4446209	4434310	9606.ENSP00000377536	9606.ENSP00000253462	0	0	0	0	0.784	0	0	0.259	0.833
CYP2C8	CYP2C9	4443714	4434798	9606.ENSP00000360317	9606.ENSP00000260682	0	0	0.449	0.979	0.18	0	0.8	0.921	0.833
EGR2	EGR1	4433822	4433758	9606.ENSP00000242480	9606.ENSP00000239938	0	0	0	0.843	0.81	0	0	0.801	0.833
MELK	GINS2	4437455	4434310	9606.ENSP00000298048	9606.ENSP00000253462	0	0	0	0	0.82	0	0	0.109	0.833
MT1G	MT1X	4447689	4446278	9606.ENSP00000391397	9606.ENSP00000377995	0	0	0	0.97	0.83	0	0	0.669	0.833
MYC	FOXM1	4451407	4441245	9606.ENSP00000479618	9606.ENSP00000342307	0	0	0	0	0.088	0.348	0	0.741	0.833
EGR1	DUSP1	4433758	4433734	9606.ENSP00000239938	9606.ENSP00000239223	0	0	0	0	0.297	0.073	0	0.763	0.833
UBE2C	FEN1	4441865	4438133	9606.ENSP00000348838	9606.ENSP00000305480	0	0	0	0	0.727	0.084	0	0.381	0.832
GOT1	PCK1	4443556	4439313	9606.ENSP00000359539	9606.ENSP00000319814	0	0	0	0	0.055	0	0.8	0.183	0.832
TOP2A	RNASEH2A	4448614	4433165	9606.ENSP00000411532	9606.ENSP00000221486	0.215	0	0	0	0.563	0.186	0	0.47	0.832
TOP2A	CDCA5	4448614	4436187	9606.ENSP00000411532	9606.ENSP00000275517	0	0	0	0	0.759	0	0	0.33	0.832
HJURP	RACGAP1	4448718	4448310	9606.ENSP00000414109	9606.ENSP00000404190	0	0	0	0	0.58	0	0	0.617	0.832
PRC1	POLE2	4446249	4432952	9606.ENSP00000377793	9606.ENSP00000216367	0	0	0	0	0.832	0	0	0	0.832
TOP2A	OIP5	4448614	4433119	9606.ENSP00000411532	9606.ENSP00000220514	0	0	0	0	0.826	0	0	0.069	0.831
CDCA8	MCM4	4444097	4435007	9606.ENSP00000362146	9606.ENSP00000262105	0	0	0	0	0.784	0	0	0.25	0.831
HKDC1	G6PC	4441643	4434327	9606.ENSP00000346643	9606.ENSP00000253801	0	0	0	0	0.051	0	0.8	0.182	0.831
MT1X	MT2A	4446278	4433922	9606.ENSP00000377995	9606.ENSP00000245185	0	0	0	0.973	0.829	0	0	0.658	0.831
KIF20A	CDCA5	4446341	4436187	9606.ENSP00000378356	9606.ENSP00000275517	0	0	0	0	0.772	0	0	0.29	0.831
MT1X	MT1H	4446278	4440195	9606.ENSP00000377995	9606.ENSP00000330587	0	0	0	0.973	0.829	0	0	0.63	0.831
TOP2A	MCM5	4448614	4432914	9606.ENSP00000411532	9606.ENSP00000216122	0	0	0	0	0.727	0.057	0	0.396	0.831
MT1H	MT1E	4440195	4438349	9606.ENSP00000330587	9606.ENSP00000307706	0	0	0	0.975	0.829	0	0	0.57	0.831
AKR1B10	HKDC1	4442268	4441643	9606.ENSP00000352584	9606.ENSP00000346643	0	0.004	0	0	0.118	0.05	0.8	0.106	0.83
KIF2C	MCM4	4443901	4435007	9606.ENSP00000361298	9606.ENSP00000262105	0	0	0	0	0.777	0	0	0.269	0.83
NUSAP1	CDKN3	4450429	4440665	9606.ENSP00000453403	9606.ENSP00000335357	0	0	0	0	0.817	0	0	0.109	0.83
MT1X	MT1E	4446278	4438349	9606.ENSP00000377995	9606.ENSP00000307706	0	0	0	0.973	0.828	0	0	0.59	0.83
OGDHL	GPT2	4444320	4441506	9606.ENSP00000363216	9606.ENSP00000345282	0	0	0	0	0.132	0	0.8	0.098	0.829
FOXM1	MCM2	4441245	4435544	9606.ENSP00000342307	9606.ENSP00000265056	0	0	0	0	0.766	0.051	0	0.294	0.829
CENPN	GINS2	4446136	4434310	9606.ENSP00000377007	9606.ENSP00000253462	0	0	0	0	0.809	0	0	0.144	0.829
CYP3A4	CYP2C18	4440831	4436654	9606.ENSP00000337915	9606.ENSP00000285979	0	0	0.443	0.63	0.19	0	0.65	0.848	0.828
FOXM1	TRIP13	4441245	4432699	9606.ENSP00000342307	9606.ENSP00000166345	0	0	0	0	0.799	0	0	0.175	0.828
FEN1	TPX2	4438133	4437665	9606.ENSP00000305480	9606.ENSP00000300403	0	0	0	0	0.802	0	0	0.167	0.828
TK1	CCNA2	4437779	4436109	9606.ENSP00000301634	9606.ENSP00000274026	0	0	0	0	0.698	0	0	0.454	0.828
HMMR	TRIP13	4446202	4432699	9606.ENSP00000377492	9606.ENSP00000166345	0	0	0	0	0.788	0	0	0.218	0.827
PTTG1	CENPN	4446209	4446136	9606.ENSP00000377536	9606.ENSP00000377007	0	0	0	0	0.78	0	0	0.248	0.827
GNMT	BHMT	4444029	4436127	9606.ENSP00000361894	9606.ENSP00000274353	0	0	0	0	0.109	0	0	0.814	0.827
ASPM	TRIP13	4442873	4432699	9606.ENSP00000356379	9606.ENSP00000166345	0	0	0	0	0.803	0.05	0	0.144	0.826
AURKB	MCM4	4438898	4435007	9606.ENSP00000313950	9606.ENSP00000262105	0	0	0	0	0.749	0	0	0.335	0.826
ETFDH	ACADM	4449371	4443625	9606.ENSP00000426638	9606.ENSP00000359871	0.079	0	0	0	0.482	0	0	0.665	0.826
MCM4	TRIP13	4435007	4432699	9606.ENSP00000262105	9606.ENSP00000166345	0	0	0	0	0.807	0	0	0.136	0.826
MS4A6A	CD163	4447767	4442211	9606.ENSP00000392770	9606.ENSP00000352071	0	0	0	0	0.812	0	0	0.115	0.826
CYP4F2	CYP4F3	4433177	4433149	9606.ENSP00000221700	9606.ENSP00000221307	0	0	0.449	0.983	0.143	0	0.8	0.93	0.825
HMMR	GINS2	4446202	4434310	9606.ENSP00000377492	9606.ENSP00000253462	0	0	0	0	0.784	0	0	0.219	0.824
ATAD2	CCNA2	4436722	4436109	9606.ENSP00000287394	9606.ENSP00000274026	0	0	0	0	0.783	0.08	0	0.189	0.824
PTTG1	OIP5	4446209	4433119	9606.ENSP00000377536	9606.ENSP00000220514	0	0	0	0	0.824	0	0	0	0.824
MBL2	CRP	4444298	4434405	9606.ENSP00000363079	9606.ENSP00000255030	0	0	0	0	0.344	0	0	0.743	0.824
ASPM	CDCA5	4442873	4436187	9606.ENSP00000356379	9606.ENSP00000275517	0	0	0	0	0.767	0	0	0.279	0.824
RACGAP1	CENPF	4448310	4442771	9606.ENSP00000404190	9606.ENSP00000355922	0	0	0	0	0.714	0	0	0.408	0.823
ESR1	FOXM1	4448358	4441245	9606.ENSP00000405330	9606.ENSP00000342307	0	0	0	0	0	0.418	0	0.709	0.823
CENPF	TRIP13	4442771	4432699	9606.ENSP00000355922	9606.ENSP00000166345	0	0	0	0	0.787	0	0	0.203	0.823
UBE2C	TK1	4441865	4437779	9606.ENSP00000348838	9606.ENSP00000301634	0	0	0	0	0.739	0	0	0.349	0.823
THBS1	DCN	4434771	4432629	9606.ENSP00000260356	9606.ENSP00000052754	0	0	0	0	0.089	0.379	0	0.713	0.823
ACOT12	MLYCD	4437948	4435080	9606.ENSP00000303246	9606.ENSP00000262430	0	0	0	0	0.062	0.09	0.8	0.084	0.822
CDCA5	AURKA	4436187	4432988	9606.ENSP00000275517	9606.ENSP00000216911	0	0	0	0	0.765	0	0	0.272	0.822
KNTC1	NCAPG	4440000	4434176	9606.ENSP00000328236	9606.ENSP00000251496	0	0	0	0	0.812	0	0	0.09	0.822
MCM3	KNTC1	4451546	4440000	9606.ENSP00000480987	9606.ENSP00000328236	0	0	0	0	0.757	0	0	0.296	0.821
ALDH3A1	ADH4	4448623	4435613	9606.ENSP00000411821	9606.ENSP00000265512	0.048	0	0	0	0.063	0	0.65	0.494	0.821
NR1I3	CYP3A4	4442999	4440831	9606.ENSP00000356959	9606.ENSP00000337915	0	0	0	0	0.061	0.085	0	0.808	0.821
FTCD	ASNS	4436927	4432722	9606.ENSP00000291670	9606.ENSP00000175506	0.042	0	0	0	0	0	0.8	0.136	0.82
TXNRD1	SRXN1	4449713	4445626	9606.ENSP00000434516	9606.ENSP00000371388	0	0	0	0	0.278	0	0	0.761	0.82
AURKB	MCM6	4438898	4435383	9606.ENSP00000313950	9606.ENSP00000264156	0	0	0	0	0.738	0	0	0.338	0.819
NCAPD2	AURKA	4439733	4432988	9606.ENSP00000325017	9606.ENSP00000216911	0	0	0	0	0.662	0.279	0	0.317	0.819
ASPM	MCM4	4442873	4435007	9606.ENSP00000356379	9606.ENSP00000262105	0	0	0	0	0.788	0.057	0	0.168	0.819
CDCA5	OIP5	4436187	4433119	9606.ENSP00000275517	9606.ENSP00000220514	0	0	0	0	0.789	0	0	0.176	0.819
PTTG1	TRIP13	4446209	4432699	9606.ENSP00000377536	9606.ENSP00000166345	0	0	0	0	0.781	0	0	0.21	0.819
AKR1B10	G6PC	4442268	4434327	9606.ENSP00000352584	9606.ENSP00000253801	0	0	0	0	0.061	0	0.8	0.117	0.819
HOGA1	AGXT2	4443592	4433532	9606.ENSP00000359680	9606.ENSP00000231420	0	0	0	0	0.086	0	0.8	0.09	0.819
ASPM	UBE2T	4442873	4442849	9606.ENSP00000356379	9606.ENSP00000356243	0	0	0	0	0.783	0.081	0	0.163	0.818
ACSL1	SLC27A2	4449224	4435783	9606.ENSP00000422607	9606.ENSP00000267842	0	0	0	0	0.191	0.133	0	0.762	0.818
KIF20A	GINS2	4446341	4434310	9606.ENSP00000378356	9606.ENSP00000253462	0	0	0	0	0.744	0	0	0.317	0.818
CPEB3	CCNB2	4451638	4436767	9606.ENSP00000482128	9606.ENSP00000288207	0	0	0	0	0.063	0	0.8	0.108	0.818
NR1I3	CYP2B6	4442999	4439703	9606.ENSP00000356959	9606.ENSP00000324648	0	0	0	0	0.075	0.085	0	0.801	0.817
PTGS2	FOS	4442894	4438204	9606.ENSP00000356438	9606.ENSP00000306245	0	0	0	0	0.109	0	0	0.802	0.817
KIF20A	OIP5	4446341	4433119	9606.ENSP00000378356	9606.ENSP00000220514	0	0	0	0	0.817	0	0	0	0.817
XDH	CYP2A6	4445208	4437722	9606.ENSP00000368727	9606.ENSP00000301141	0	0	0	0	0.087	0	0.8	0.073	0.816
CDKN3	FEN1	4440665	4438133	9606.ENSP00000335357	9606.ENSP00000305480	0	0	0	0	0.78	0.081	0	0.165	0.816
NUSAP1	MCM4	4450429	4435007	9606.ENSP00000453403	9606.ENSP00000262105	0	0	0	0	0.789	0	0	0.163	0.816
UBE2C	CENPM	4441865	4432895	9606.ENSP00000348838	9606.ENSP00000215980	0	0	0	0	0.766	0	0	0.245	0.816
FOXM1	CENPM	4441245	4432895	9606.ENSP00000342307	9606.ENSP00000215980	0	0	0	0	0.792	0	0	0.145	0.815
ZFP36	JUNB	4450924	4437951	9606.ENSP00000469647	9606.ENSP00000303315	0	0	0	0	0.786	0	0	0.172	0.815
GLS2	FTCD	4438590	4436927	9606.ENSP00000310447	9606.ENSP00000291670	0	0	0	0	0.09	0	0.8	0.063	0.814
GINS2	RNASEH2A	4434310	4433165	9606.ENSP00000253462	9606.ENSP00000221486	0	0	0	0	0.799	0	0	0.11	0.813
SRXN1	CAT	4445626	4433793	9606.ENSP00000371388	9606.ENSP00000241052	0	0	0	0	0.329	0	0	0.733	0.813
UBE2T	MELK	4442849	4437455	9606.ENSP00000356243	9606.ENSP00000298048	0	0	0	0	0.73	0.079	0	0.304	0.812
UBE2C	OIP5	4441865	4433119	9606.ENSP00000348838	9606.ENSP00000220514	0	0	0	0	0.792	0	0	0.132	0.812
MT1E	MT2A	4438349	4433922	9606.ENSP00000307706	9606.ENSP00000245185	0	0	0	0.976	0.81	0	0	0.633	0.812
FAM83D	CDC20	4451564	4443940	9606.ENSP00000481110	9606.ENSP00000361540	0	0	0	0	0.76	0	0	0.247	0.812
UHRF1	CDCA5	4451406	4436187	9606.ENSP00000479617	9606.ENSP00000275517	0	0	0	0	0.764	0	0	0.237	0.812
FMO3	DMGDH	4442952	4434417	9606.ENSP00000356729	9606.ENSP00000255189	0.05	0	0	0	0.064	0	0	0.805	0.811
OIP5	AURKA	4433119	4432988	9606.ENSP00000220514	9606.ENSP00000216911	0	0	0	0	0.802	0	0	0.084	0.811
ASPM	ATAD2	4442873	4436722	9606.ENSP00000356379	9606.ENSP00000287394	0	0	0	0	0.782	0.134	0	0.079	0.811
PTTG1	FEN1	4446209	4438133	9606.ENSP00000377536	9606.ENSP00000305480	0	0	0	0	0.775	0	0	0.189	0.81
UHRF1	NUSAP1	4451406	4450429	9606.ENSP00000479617	9606.ENSP00000453403	0	0	0	0	0.76	0	0	0.241	0.81
FTCD	DMGDH	4436927	4434417	9606.ENSP00000291670	9606.ENSP00000255189	0.111	0	0	0	0.143	0	0	0.771	0.81
CENPN	TPX2	4446136	4437665	9606.ENSP00000377007	9606.ENSP00000300403	0	0	0	0	0.795	0	0	0.111	0.81
MCM3	CDCA8	4451546	4444097	9606.ENSP00000480987	9606.ENSP00000362146	0	0	0	0	0.768	0	0	0.216	0.81
NFIL3	ID2	4437431	4433615	9606.ENSP00000297689	9606.ENSP00000234091	0	0	0	0	0	0	0	0.81	0.81
KIF4A	CDCA5	4444386	4436187	9606.ENSP00000363524	9606.ENSP00000275517	0	0	0	0	0.73	0	0	0.323	0.809
CCNA2	CENPM	4436109	4432895	9606.ENSP00000274026	9606.ENSP00000215980	0	0	0	0	0.796	0	0	0.101	0.809
CYP3A4	SLCO1B1	4440831	4434521	9606.ENSP00000337915	9606.ENSP00000256958	0	0	0	0	0.103	0	0	0.796	0.809
RACGAP1	CDKN3	4448310	4440665	9606.ENSP00000404190	9606.ENSP00000335357	0	0	0	0	0.795	0	0	0.108	0.809
TPX2	ATAD2	4437665	4436722	9606.ENSP00000300403	9606.ENSP00000287394	0	0	0	0	0.784	0	0	0.148	0.808
KIF2C	TRIP13	4443901	4432699	9606.ENSP00000361298	9606.ENSP00000166345	0	0	0	0	0.797	0	0	0.089	0.808
PRC1	TRIP13	4446249	4432699	9606.ENSP00000377793	9606.ENSP00000166345	0	0	0	0	0.808	0	0	0	0.808
TPX2	CDCA5	4437665	4436187	9606.ENSP00000300403	9606.ENSP00000275517	0	0	0	0	0.748	0	0	0.269	0.808
HPR	LCAT	4450004	4435353	9606.ENSP00000441828	9606.ENSP00000264005	0	0	0	0	0.063	0	0.72	0.33	0.808
ALDH6A1	ACOT12	4450308	4437948	9606.ENSP00000450436	9606.ENSP00000303246	0	0	0	0	0.062	0	0.8	0.058	0.807
CPEB3	AURKA	4451638	4432988	9606.ENSP00000482128	9606.ENSP00000216911	0	0	0	0	0.062	0	0.8	0.056	0.807
CDC20	OIP5	4443940	4433119	9606.ENSP00000361540	9606.ENSP00000220514	0	0	0	0	0.8	0	0	0.073	0.806
CDKN3	GINS2	4440665	4434310	9606.ENSP00000335357	9606.ENSP00000253462	0	0	0	0	0.785	0	0	0.136	0.806
COG2	CETP	4442720	4432783	9606.ENSP00000355629	9606.ENSP00000200676	0	0	0	0	0	0	0	0.806	0.806
HJURP	GINS2	4448718	4434310	9606.ENSP00000414109	9606.ENSP00000253462	0	0	0	0	0.758	0	0	0.234	0.806
CNDP1	GLS2	4442175	4438590	9606.ENSP00000351682	9606.ENSP00000310447	0	0	0	0	0.059	0	0.8	0.05	0.805
CYP8B1	SQLE	4439232	4435659	9606.ENSP00000318867	9606.ENSP00000265896	0	0	0	0	0.511	0.182	0	0.553	0.805
TOP2A	POLE2	4448614	4432952	9606.ENSP00000411532	9606.ENSP00000216367	0	0	0	0	0.713	0	0	0.348	0.805
TPX2	CENPM	4437665	4432895	9606.ENSP00000300403	9606.ENSP00000215980	0	0	0	0	0.793	0	0	0.089	0.804
NCAPG	CENPM	4434176	4432895	9606.ENSP00000251496	9606.ENSP00000215980	0	0	0	0	0.804	0	0	0	0.804
KIF20A	MCM7	4446341	4438312	9606.ENSP00000378356	9606.ENSP00000307288	0	0	0	0	0.735	0	0	0.291	0.804
TOP2A	KNTC1	4448614	4440000	9606.ENSP00000411532	9606.ENSP00000328236	0	0	0	0	0.766	0	0	0.194	0.803
CYP2C8	CYP3A5	4443714	4433259	9606.ENSP00000360317	9606.ENSP00000222982	0	0	0.444	0.635	0.084	0	0.65	0.846	0.803
PTGS2	HPGD	4442894	4437300	9606.ENSP00000356438	9606.ENSP00000296522	0	0	0	0	0.061	0	0	0.799	0.803
MT1H	MT2A	4440195	4433922	9606.ENSP00000330587	9606.ENSP00000245185	0	0	0	0.974	0.801	0	0	0.57	0.803
MCM3	NCAPD2	4451546	4439733	9606.ENSP00000480987	9606.ENSP00000325017	0	0	0	0	0.795	0	0	0.075	0.803
CDC20	RNASEH2A	4443940	4433165	9606.ENSP00000361540	9606.ENSP00000221486	0	0	0	0	0.781	0	0	0.138	0.803
CXCL2	PTGS2	4449392	4442894	9606.ENSP00000427279	9606.ENSP00000356438	0	0	0	0	0.538	0	0	0.588	0.802
VNN1	PANK1	4442984	4437824	9606.ENSP00000356905	9606.ENSP00000302108	0	0	0	0	0.064	0	0.65	0.442	0.801
GOT1	FTCD	4443556	4436927	9606.ENSP00000359539	9606.ENSP00000291670	0	0	0	0	0	0	0.8	0.05	0.801
FEN1	MELK	4438133	4437455	9606.ENSP00000305480	9606.ENSP00000298048	0	0	0	0	0.801	0	0	0	0.801
AURKB	OIP5	4438898	4433119	9606.ENSP00000313950	9606.ENSP00000220514	0	0	0	0	0.793	0	0	0.074	0.801
CENPN	KIF4A	4446136	4444386	9606.ENSP00000377007	9606.ENSP00000363524	0	0	0	0	0.761	0	0	0.198	0.8
UHRF1	GINS2	4451406	4434310	9606.ENSP00000479617	9606.ENSP00000253462	0	0	0	0	0.764	0	0	0.187	0.8
KIF4A	OIP5	4444386	4433119	9606.ENSP00000363524	9606.ENSP00000220514	0	0	0	0	0.8	0	0	0	0.8
KNTC1	MCM5	4440000	4432914	9606.ENSP00000328236	9606.ENSP00000216122	0	0	0	0	0.711	0	0	0.332	0.799
MCM6	NCAPG	4435383	4434176	9606.ENSP00000264156	9606.ENSP00000251496	0	0	0	0	0.748	0	0	0.237	0.799
HMMR	CENPM	4446202	4432895	9606.ENSP00000377492	9606.ENSP00000215980	0	0	0	0	0.728	0	0	0.292	0.799
GINS2	OIP5	4434310	4433119	9606.ENSP00000253462	9606.ENSP00000220514	0	0	0	0	0.799	0	0	0	0.799
CDCA8	TK1	4444097	4437779	9606.ENSP00000362146	9606.ENSP00000301634	0	0	0	0	0.724	0	0	0.296	0.798
CYP2C18	CYP3A5	4436654	4433259	9606.ENSP00000285979	9606.ENSP00000222982	0	0	0.443	0.626	0.117	0	0.65	0.69	0.797
TK1	CDCA5	4437779	4436187	9606.ENSP00000301634	9606.ENSP00000275517	0	0	0	0	0.743	0	0	0.236	0.795
AURKA	CENPM	4432988	4432895	9606.ENSP00000216911	9606.ENSP00000215980	0	0	0	0	0.739	0	0	0.25	0.795
NCAPG	MCM5	4434176	4432914	9606.ENSP00000251496	9606.ENSP00000216122	0	0	0	0	0.784	0	0	0.085	0.794
APOF	PON1	4446789	4433224	9606.ENSP00000381250	9606.ENSP00000222381	0	0	0	0	0.145	0	0.54	0.519	0.794
FOXM1	GINS2	4441245	4434310	9606.ENSP00000342307	9606.ENSP00000253462	0	0	0	0	0.767	0	0	0.146	0.793
AURKB	RNASEH2A	4438898	4433165	9606.ENSP00000313950	9606.ENSP00000221486	0	0	0	0	0.784	0	0	0.08	0.793
HPR	CETP	4450004	4432783	9606.ENSP00000441828	9606.ENSP00000200676	0	0	0	0	0	0	0.72	0.292	0.793
KIF20A	POLE2	4446341	4432952	9606.ENSP00000378356	9606.ENSP00000216367	0	0	0	0	0.602	0	0	0.499	0.792
ASPM	GINS2	4442873	4434310	9606.ENSP00000356379	9606.ENSP00000253462	0	0	0	0	0.792	0	0	0.041	0.792
SPP1	ALPL	4446370	4444459	9606.ENSP00000378517	9606.ENSP00000363973	0	0	0	0	0.065	0	0	0.787	0.792
GNMT	FTCD	4444029	4436927	9606.ENSP00000361894	9606.ENSP00000291670	0	0	0	0	0.113	0	0	0.774	0.791
HMMR	CENPN	4446202	4446136	9606.ENSP00000377492	9606.ENSP00000377007	0	0	0	0	0.791	0	0	0	0.791
APOF	LCAT	4446789	4435353	9606.ENSP00000381250	9606.ENSP00000264005	0	0	0	0	0.082	0	0.54	0.545	0.791
MCM3	KIF20A	4451546	4446341	9606.ENSP00000480987	9606.ENSP00000378356	0	0	0	0	0.764	0	0	0.15	0.791
CDCA8	FEN1	4444097	4438133	9606.ENSP00000362146	9606.ENSP00000305480	0	0	0	0	0.791	0	0	0	0.791
CDCA5	GINS2	4436187	4434310	9606.ENSP00000275517	9606.ENSP00000253462	0	0	0	0	0.733	0	0	0.244	0.79
CDKN3	TRIP13	4440665	4432699	9606.ENSP00000335357	9606.ENSP00000166345	0	0	0	0	0.773	0.084	0	0.07	0.79
ALDH3A1	ADH6	4448623	4446342	9606.ENSP00000411821	9606.ENSP00000378359	0.048	0	0	0	0.063	0	0.65	0.407	0.79
UBE2C	MCM4	4441865	4435007	9606.ENSP00000348838	9606.ENSP00000262105	0	0	0	0	0.708	0.11	0	0.256	0.79
KIF2C	FEN1	4443901	4438133	9606.ENSP00000361298	9606.ENSP00000305480	0	0	0	0	0.786	0	0	0.056	0.79
KIF4A	MCM2	4444386	4435544	9606.ENSP00000363524	9606.ENSP00000265056	0	0	0	0	0.759	0	0	0.167	0.79
CENPN	CDKN3	4446136	4440665	9606.ENSP00000377007	9606.ENSP00000335357	0	0	0	0	0.784	0	0	0.063	0.789
ATAD2	NCAPG	4436722	4434176	9606.ENSP00000287394	9606.ENSP00000251496	0	0	0	0	0.787	0	0	0.05	0.789
HJURP	PRC1	4448718	4446249	9606.ENSP00000414109	9606.ENSP00000377793	0	0	0	0	0.789	0	0	0	0.789
APOA5	HPR	4450143	4450004	9606.ENSP00000445002	9606.ENSP00000441828	0	0	0	0	0.251	0	0.72	0.073	0.788
CTH	MSRA	4443637	4438894	9606.ENSP00000359976	9606.ENSP00000313921	0.282	0	0	0	0.188	0.186	0	0.607	0.788
UHRF1	KIF20A	4451406	4446341	9606.ENSP00000479617	9606.ENSP00000378356	0	0	0	0	0.755	0	0	0.167	0.787
CDKN3	MCM4	4440665	4435007	9606.ENSP00000335357	9606.ENSP00000262105	0	0	0	0	0.734	0.082	0	0.201	0.787
ALPL	GOT1	4444459	4443556	9606.ENSP00000363973	9606.ENSP00000359539	0	0	0	0	0.064	0	0	0.782	0.787
HJURP	CDKN3	4448718	4440665	9606.ENSP00000414109	9606.ENSP00000335357	0	0	0	0	0.787	0	0	0	0.787
UHRF1	KIF2C	4451406	4443901	9606.ENSP00000479617	9606.ENSP00000361298	0	0	0	0	0.771	0	0	0.105	0.787
MCM4	RNASEH2A	4435007	4433165	9606.ENSP00000262105	9606.ENSP00000221486	0	0	0	0	0.738	0	0	0.217	0.786
MT1X	MT1F	4446278	4440608	9606.ENSP00000377995	9606.ENSP00000334872	0	0	0	0.969	0.782	0	0	0.647	0.786
ASS1	ARG1	4443929	4441926	9606.ENSP00000361471	9606.ENSP00000349446	0	0	0	0	0.078	0	0	0.777	0.785
MYC	ETS2	4451407	4442345	9606.ENSP00000479618	9606.ENSP00000353344	0	0	0	0	0.062	0.094	0	0.766	0.785
NCAPD2	MCM2	4439733	4435544	9606.ENSP00000325017	9606.ENSP00000265056	0	0	0	0	0.718	0	0	0.269	0.785
MT1G	MT1E	4447689	4438349	9606.ENSP00000391397	9606.ENSP00000307706	0	0	0	0.975	0.781	0	0	0.63	0.784
NR4A2	FOS	4441430	4438204	9606.ENSP00000344479	9606.ENSP00000306245	0	0	0	0	0.559	0	0	0.53	0.784
UBE2T	OIP5	4442849	4433119	9606.ENSP00000356243	9606.ENSP00000220514	0	0	0	0	0.659	0.393	0	0	0.784
UBE2T	AURKA	4442849	4432988	9606.ENSP00000356243	9606.ENSP00000216911	0	0	0	0	0.742	0.064	0	0.174	0.784
CP	CAT	4435459	4433793	9606.ENSP00000264613	9606.ENSP00000241052	0.043	0	0	0	0.063	0	0	0.778	0.784
PRC1	GINS2	4446249	4434310	9606.ENSP00000377793	9606.ENSP00000253462	0	0	0	0	0.783	0	0	0	0.783
NUSAP1	KNTC1	4450429	4440000	9606.ENSP00000453403	9606.ENSP00000328236	0	0	0	0	0.713	0	0	0.273	0.783
PRC1	MCM6	4446249	4435383	9606.ENSP00000377793	9606.ENSP00000264156	0	0	0	0	0.752	0	0	0.161	0.783
UHRF1	MCM4	4451406	4435007	9606.ENSP00000479617	9606.ENSP00000262105	0	0	0	0	0.74	0	0	0.197	0.783
MT1G	MT2A	4447689	4433922	9606.ENSP00000391397	9606.ENSP00000245185	0	0	0	0.976	0.78	0	0	0.63	0.783
CKAP5	MCM6	4449644	4435383	9606.ENSP00000432768	9606.ENSP00000264156	0	0	0	0	0.256	0.721	0	0	0.783
UHRF1	TPX2	4451406	4437665	9606.ENSP00000479617	9606.ENSP00000300403	0	0	0	0	0.751	0	0	0.164	0.783
MT1G	MT1F	4447689	4440608	9606.ENSP00000391397	9606.ENSP00000334872	0	0	0	0.976	0.779	0	0	0.752	0.782
PTTG1	MCM2	4446209	4435544	9606.ENSP00000377536	9606.ENSP00000265056	0	0	0	0	0.676	0	0	0.353	0.782
CYP8B1	SLC10A1	4439232	4432972	9606.ENSP00000318867	9606.ENSP00000216540	0	0	0	0	0.107	0	0	0.765	0.781
MCM2	OIP5	4435544	4433119	9606.ENSP00000265056	9606.ENSP00000220514	0	0	0	0	0.781	0	0	0	0.781
MELK	MCM6	4437455	4435383	9606.ENSP00000298048	9606.ENSP00000264156	0	0	0	0	0.706	0.085	0	0.249	0.781
FEN1	OIP5	4438133	4433119	9606.ENSP00000305480	9606.ENSP00000220514	0	0	0	0	0.78	0	0	0	0.78
FAM83D	AURKA	4451564	4432988	9606.ENSP00000481110	9606.ENSP00000216911	0	0	0	0	0.686	0	0	0.329	0.78
PRC1	CENPN	4446249	4446136	9606.ENSP00000377793	9606.ENSP00000377007	0	0	0	0	0.78	0	0	0	0.78
HPR	LPA	4450004	4439432	9606.ENSP00000441828	9606.ENSP00000321334	0	0	0	0.636	0.161	0	0.72	0.314	0.78
FAM83D	CDCA8	4451564	4444097	9606.ENSP00000481110	9606.ENSP00000362146	0	0	0	0	0.674	0	0	0.349	0.779
LPA	LIPC	4439432	4437532	9606.ENSP00000321334	9606.ENSP00000299022	0	0	0	0	0.188	0.061	0.54	0.444	0.779
HMMR	POLE2	4446202	4432952	9606.ENSP00000377492	9606.ENSP00000216367	0	0	0	0	0.718	0	0	0.245	0.778
UHRF1	MELK	4451406	4437455	9606.ENSP00000479617	9606.ENSP00000298048	0	0	0	0	0.741	0	0	0.174	0.777
KIF4A	GINS2	4444386	4434310	9606.ENSP00000363524	9606.ENSP00000253462	0	0	0	0	0.725	0	0	0.223	0.777
PPARGC1A	PDK4	4435507	4432556	9606.ENSP00000264867	9606.ENSP00000005178	0	0	0	0	0.088	0.32	0	0.67	0.777
TPX2	MCM5	4437665	4432914	9606.ENSP00000300403	9606.ENSP00000216122	0	0	0	0	0.776	0	0	0	0.776
FAM83D	TOP2A	4451564	4448614	9606.ENSP00000481110	9606.ENSP00000411532	0	0	0	0	0.736	0	0	0.188	0.776
KIF20A	NCAPD2	4446341	4439733	9606.ENSP00000378356	9606.ENSP00000325017	0	0	0	0	0.665	0	0	0.358	0.776
KIF20A	MCM6	4446341	4435383	9606.ENSP00000378356	9606.ENSP00000264156	0	0	0	0	0.715	0	0	0.246	0.776
KIF20A	MCM5	4446341	4432914	9606.ENSP00000378356	9606.ENSP00000216122	0	0	0	0	0.745	0	0	0.154	0.775
ASPM	C1orf112	4442873	4436655	9606.ENSP00000356379	9606.ENSP00000286031	0	0	0	0	0.774	0	0	0	0.774
LPA	C9	4439432	4435259	9606.ENSP00000321334	9606.ENSP00000263408	0	0	0	0	0.693	0.08	0	0.258	0.773
ESR1	PTGS2	4448358	4442894	9606.ENSP00000405330	9606.ENSP00000356438	0	0	0	0	0	0.05	0	0.771	0.773
CCNB2	POLE2	4436767	4432952	9606.ENSP00000288207	9606.ENSP00000216367	0	0	0	0	0.698	0	0	0.281	0.773
KNTC1	CCNA2	4440000	4436109	9606.ENSP00000328236	9606.ENSP00000274026	0	0	0	0	0.715	0.124	0	0.166	0.773
PLG	CRP	4438461	4434405	9606.ENSP00000308938	9606.ENSP00000255030	0	0	0	0	0.166	0	0	0.737	0.771
CCNB2	RNASEH2A	4436767	4433165	9606.ENSP00000288207	9606.ENSP00000221486	0	0	0	0	0.756	0	0	0.101	0.771
APOF	LPA	4446789	4439432	9606.ENSP00000381250	9606.ENSP00000321334	0	0	0	0	0.13	0	0.54	0.474	0.771
UBE2C	MCM7	4441865	4438312	9606.ENSP00000348838	9606.ENSP00000307288	0	0	0	0	0.604	0.11	0	0.399	0.77
CENPM	TRIP13	4432895	4432699	9606.ENSP00000215980	9606.ENSP00000166345	0	0	0	0	0.729	0	0	0.187	0.77
PDE7B	ADCY1	4438618	4437392	9606.ENSP00000310661	9606.ENSP00000297323	0	0	0	0	0.108	0.137	0.65	0.244	0.769
CYP2C8	CYP26A1	4443714	4433297	9606.ENSP00000360317	9606.ENSP00000224356	0	0	0.438	0.571	0	0	0.65	0.487	0.769
PLG	C9	4438461	4435259	9606.ENSP00000308938	9606.ENSP00000263408	0	0	0	0	0.677	0.08	0	0.285	0.769
MELK	ATAD2	4437455	4436722	9606.ENSP00000298048	9606.ENSP00000287394	0	0	0	0	0.761	0	0	0.075	0.769
NUSAP1	CDCA5	4450429	4436187	9606.ENSP00000453403	9606.ENSP00000275517	0	0	0	0	0.636	0	0	0.391	0.769
MT1F	MT1H	4440608	4440195	9606.ENSP00000334872	9606.ENSP00000330587	0	0	0	0.973	0.766	0	0	0.583	0.769
MYC	ATAD2	4451407	4436722	9606.ENSP00000479618	9606.ENSP00000287394	0	0	0	0	0.098	0.379	0	0.619	0.768
NUSAP1	ATAD2	4450429	4436722	9606.ENSP00000453403	9606.ENSP00000287394	0	0	0	0	0.768	0	0	0	0.768
RACGAP1	MCM7	4448310	4438312	9606.ENSP00000404190	9606.ENSP00000307288	0	0	0	0	0.743	0	0	0.13	0.767
SQLE	ACAT1	4435659	4435651	9606.ENSP00000265896	9606.ENSP00000265838	0	0	0	0	0.175	0	0	0.729	0.767
NFIL3	RORA	4437431	4434895	9606.ENSP00000297689	9606.ENSP00000261523	0	0	0	0	0	0.063	0	0.761	0.766
CEBPA	FOXO1	4449403	4445233	9606.ENSP00000427514	9606.ENSP00000368880	0	0	0	0	0.062	0.299	0	0.672	0.766
CXCL12	CXCL14	4446453	4440759	9606.ENSP00000379140	9606.ENSP00000337065	0	0	0	0	0.098	0.221	0	0.694	0.766
CDC20	UBE2T	4443940	4442849	9606.ENSP00000361540	9606.ENSP00000356243	0	0	0	0	0.656	0.145	0	0.266	0.765
CDCA8	MCM5	4444097	4432914	9606.ENSP00000362146	9606.ENSP00000216122	0	0	0	0	0.716	0	0	0.206	0.765
PRC1	FEN1	4446249	4438133	9606.ENSP00000377793	9606.ENSP00000305480	0	0	0	0	0.762	0	0	0.051	0.765
C1orf112	NCAPG	4436655	4434176	9606.ENSP00000286031	9606.ENSP00000251496	0	0	0	0	0.673	0	0	0.31	0.764
FOS	EGR2	4438204	4433822	9606.ENSP00000306245	9606.ENSP00000242480	0	0	0	0	0.271	0.073	0	0.677	0.763
TAT	SDS	4441813	4434551	9606.ENSP00000348234	9606.ENSP00000257549	0	0	0	0	0.143	0	0	0.735	0.763
ASPM	MCM2	4442873	4435544	9606.ENSP00000356379	9606.ENSP00000265056	0	0	0	0	0.723	0.057	0	0.165	0.763
MCM2	CENPM	4435544	4432895	9606.ENSP00000265056	9606.ENSP00000215980	0	0	0	0	0.735	0	0	0.139	0.762
FAM83D	CCNA2	4451564	4436109	9606.ENSP00000481110	9606.ENSP00000274026	0	0	0	0	0.739	0	0	0.126	0.762
MBL2	HABP2	4444298	4436268	9606.ENSP00000363079	9606.ENSP00000277903	0	0	0	0	0.487	0.057	0	0.546	0.761
ZFP36	FOSB	4450924	4433953	9606.ENSP00000469647	9606.ENSP00000245919	0	0	0	0	0.625	0	0	0.386	0.76
FEN1	TRIP13	4438133	4432699	9606.ENSP00000305480	9606.ENSP00000166345	0.052	0	0	0	0.72	0	0	0.166	0.76
CENPF	GINS2	4442771	4434310	9606.ENSP00000355922	9606.ENSP00000253462	0	0	0	0	0.721	0	0	0.17	0.759
CENPF	ATAD2	4442771	4436722	9606.ENSP00000355922	9606.ENSP00000287394	0	0	0	0	0.685	0	0	0.265	0.759
APOA5	APOF	4450143	4446789	9606.ENSP00000445002	9606.ENSP00000381250	0	0	0	0	0.183	0	0.54	0.411	0.759
KIF4A	NCAPD2	4444386	4439733	9606.ENSP00000363524	9606.ENSP00000325017	0	0	0	0	0.597	0	0	0.423	0.757
NQO1	CAT	4439310	4433793	9606.ENSP00000319788	9606.ENSP00000241052	0	0	0	0	0.062	0	0	0.751	0.756
ALDH2	EHHADH	4434937	4433550	9606.ENSP00000261733	9606.ENSP00000231887	0.042	0	0	0	0.063	0	0.65	0.316	0.756
PRC1	CENPM	4446249	4432895	9606.ENSP00000377793	9606.ENSP00000215980	0	0	0	0	0.734	0	0	0.118	0.756
CYP2C9	CYP26A1	4434798	4433297	9606.ENSP00000260682	9606.ENSP00000224356	0	0	0.44	0.571	0	0	0.65	0.377	0.755
MELK	POLE2	4437455	4432952	9606.ENSP00000298048	9606.ENSP00000216367	0	0	0	0	0.748	0	0	0.068	0.755
KNTC1	MELK	4440000	4437455	9606.ENSP00000328236	9606.ENSP00000298048	0	0	0	0	0.721	0	0	0.156	0.755
PRC1	CDCA5	4446249	4436187	9606.ENSP00000377793	9606.ENSP00000275517	0	0	0	0	0.733	0	0	0.121	0.755
CEBPA	ATF5	4449403	4447955	9606.ENSP00000427514	9606.ENSP00000396954	0	0	0	0	0.062	0.654	0	0.306	0.755
ASPM	POLE2	4442873	4432952	9606.ENSP00000356379	9606.ENSP00000216367	0	0	0	0	0.699	0	0	0.216	0.754
MYC	NOTCH3	4451407	4435256	9606.ENSP00000479618	9606.ENSP00000263388	0	0	0	0	0	0.271	0	0.675	0.753
KNTC1	MCM6	4440000	4435383	9606.ENSP00000328236	9606.ENSP00000264156	0	0	0	0	0.732	0	0	0.117	0.753
POLE2	TRIP13	4432952	4432699	9606.ENSP00000216367	9606.ENSP00000166345	0	0	0	0	0.686	0.084	0	0.212	0.753
SLC22A1	SLCO1B3	4442777	4434834	9606.ENSP00000355930	9606.ENSP00000261196	0	0	0	0	0.061	0	0	0.748	0.753
NUSAP1	NCAPD2	4450429	4439733	9606.ENSP00000453403	9606.ENSP00000325017	0	0	0	0	0.723	0	0	0.14	0.752
UBE2T	CDCA5	4442849	4436187	9606.ENSP00000356243	9606.ENSP00000275517	0	0	0	0	0.693	0	0	0.224	0.752
MCM6	RNASEH2A	4435383	4433165	9606.ENSP00000264156	9606.ENSP00000221486	0	0	0	0	0.606	0	0	0.396	0.752
ACSL1	ACADM	4449224	4443625	9606.ENSP00000422607	9606.ENSP00000359871	0.051	0	0	0	0.456	0.087	0	0.537	0.752
MYC	FOXO1	4451407	4445233	9606.ENSP00000479618	9606.ENSP00000368880	0	0	0	0	0	0.05	0	0.75	0.752
CYP2C18	CYP26A1	4436654	4433297	9606.ENSP00000285979	9606.ENSP00000224356	0	0	0.438	0.567	0	0	0.65	0.349	0.752
FAM83D	CDCA5	4451564	4436187	9606.ENSP00000481110	9606.ENSP00000275517	0	0	0	0	0.69	0	0	0.23	0.751
MBL2	CFP	4444298	4434012	9606.ENSP00000363079	9606.ENSP00000247153	0	0	0	0	0.054	0.123	0	0.725	0.751
JUNB	DUSP1	4437951	4433734	9606.ENSP00000303315	9606.ENSP00000239223	0	0	0	0	0.657	0.125	0	0.235	0.75
FOXO1	PCK1	4445233	4439313	9606.ENSP00000368880	9606.ENSP00000319814	0	0	0	0	0	0	0	0.749	0.749
CYR61	EGR1	4448043	4433758	9606.ENSP00000398736	9606.ENSP00000239938	0	0	0	0	0.179	0	0	0.706	0.749
CYP2C9	SLCO1B1	4434798	4434521	9606.ENSP00000260682	9606.ENSP00000256958	0	0	0	0	0.091	0	0	0.735	0.748
CYP39A1	SQLE	4436171	4435659	9606.ENSP00000275016	9606.ENSP00000265896	0	0	0	0	0.511	0.182	0	0.419	0.747
TK1	CCNB2	4437779	4436767	9606.ENSP00000301634	9606.ENSP00000288207	0	0	0	0	0.642	0	0	0.322	0.747
FOXO1	PDK4	4445233	4432556	9606.ENSP00000368880	9606.ENSP00000005178	0	0	0	0	0	0	0	0.746	0.747
CENPN	ASPM	4446136	4442873	9606.ENSP00000377007	9606.ENSP00000356379	0	0	0	0	0.747	0	0	0	0.747
MYC	MAP2K1	4451407	4437859	9606.ENSP00000479618	9606.ENSP00000302486	0	0	0	0	0	0.379	0	0.608	0.746
F9	OTC	4433043	4432619	9606.ENSP00000218099	9606.ENSP00000039007	0	0	0	0	0.274	0	0	0.665	0.746
FAM83D	AURKB	4451564	4438898	9606.ENSP00000481110	9606.ENSP00000313950	0	0	0	0	0.686	0	0	0.224	0.746
CDKN3	POLE2	4440665	4432952	9606.ENSP00000335357	9606.ENSP00000216367	0	0	0	0	0.663	0.191	0	0.144	0.746
FOXM1	OIP5	4441245	4433119	9606.ENSP00000342307	9606.ENSP00000220514	0	0	0	0	0.741	0	0	0.059	0.746
PDE7B	ALDH8A1	4438618	4435623	9606.ENSP00000310661	9606.ENSP00000265605	0	0	0	0	0	0	0	0.745	0.745
PTTG1	RNASEH2A	4446209	4433165	9606.ENSP00000377536	9606.ENSP00000221486	0	0	0	0	0.722	0	0	0.12	0.745
UBE2T	CDKN3	4442849	4440665	9606.ENSP00000356243	9606.ENSP00000335357	0	0	0	0	0.74	0	0	0.061	0.745
NCAPD2	GINS2	4439733	4434310	9606.ENSP00000325017	9606.ENSP00000253462	0	0	0	0	0.736	0	0	0.075	0.745
CYP2C8	NR1I3	4443714	4442999	9606.ENSP00000360317	9606.ENSP00000356959	0	0	0	0	0.06	0.407	0	0.579	0.745
ASPM	CENPM	4442873	4432895	9606.ENSP00000356379	9606.ENSP00000215980	0	0	0	0	0.74	0	0	0.056	0.744
GHR	IGFBP3	4451768	4445494	9606.ENSP00000483403	9606.ENSP00000370473	0	0	0	0	0.062	0	0	0.739	0.744
TPX2	MCM6	4437665	4435383	9606.ENSP00000300403	9606.ENSP00000264156	0	0	0	0	0.652	0	0	0.295	0.744
GLYAT	ACADS	4451863	4433826	9606.ENSP00000484592	9606.ENSP00000242592	0	0	0	0	0	0	0	0.743	0.743
RACGAP1	MCM6	4448310	4435383	9606.ENSP00000404190	9606.ENSP00000264156	0	0	0	0	0.715	0	0	0.134	0.743
KNTC1	NCAPD2	4440000	4439733	9606.ENSP00000328236	9606.ENSP00000325017	0	0	0	0	0.633	0	0	0.33	0.743
CDKN3	CENPM	4440665	4432895	9606.ENSP00000335357	9606.ENSP00000215980	0	0	0	0	0.742	0	0	0	0.742
TXNRD1	NQO1	4449713	4439310	9606.ENSP00000434516	9606.ENSP00000319788	0	0	0	0	0.152	0	0	0.708	0.742
SHBG	CRP	4445394	4434405	9606.ENSP00000369816	9606.ENSP00000255030	0	0	0	0	0.176	0	0	0.7	0.742
LIPC	PON1	4437532	4433224	9606.ENSP00000299022	9606.ENSP00000222381	0	0	0	0	0.08	0	0.54	0.441	0.742
OIP5	POLE2	4433119	4432952	9606.ENSP00000220514	9606.ENSP00000216367	0	0	0	0	0.741	0	0	0	0.741
FTCD	FETUB	4436927	4435539	9606.ENSP00000291670	9606.ENSP00000265029	0	0	0	0	0.74	0	0	0	0.74
SERPINA10	F9	4434989	4433043	9606.ENSP00000261994	9606.ENSP00000218099	0	0	0	0	0.554	0.129	0	0.384	0.74
MCM3	AURKA	4451546	4432988	9606.ENSP00000480987	9606.ENSP00000216911	0	0	0	0	0.644	0	0	0.299	0.74
PTGS2	DUSP1	4442894	4433734	9606.ENSP00000356438	9606.ENSP00000239223	0	0	0	0	0.136	0.084	0	0.698	0.74
MCM3	MELK	4451546	4437455	9606.ENSP00000480987	9606.ENSP00000298048	0	0	0	0	0.724	0.085	0	0.049	0.739
CDCA5	MCM5	4436187	4432914	9606.ENSP00000275517	9606.ENSP00000216122	0	0	0	0	0.663	0	0	0.256	0.739
ABCB4	SLC10A1	4435637	4432972	9606.ENSP00000265723	9606.ENSP00000216540	0	0	0	0	0.062	0	0	0.733	0.739
CEBPA	ATF3	4449403	4441415	9606.ENSP00000427514	9606.ENSP00000344352	0	0	0	0	0.147	0.534	0	0.394	0.738
G6PD	IDNK	4446162	4444727	9606.ENSP00000377192	9606.ENSP00000365601	0.218	0	0	0	0.062	0	0	0.672	0.738
G6PD	HSPB1	4446162	4434059	9606.ENSP00000377192	9606.ENSP00000248553	0	0	0	0	0.076	0.379	0	0.58	0.738
VWF	CRP	4434871	4434405	9606.ENSP00000261405	9606.ENSP00000255030	0	0	0	0	0	0	0	0.738	0.738
MYC	GLS2	4451407	4438590	9606.ENSP00000479618	9606.ENSP00000310447	0	0	0	0	0	0	0	0.737	0.737
SLC22A1	SLCO1B1	4442777	4434521	9606.ENSP00000355930	9606.ENSP00000256958	0	0	0	0	0.095	0	0	0.722	0.737
FBP1	PCK1	4448472	4439313	9606.ENSP00000408025	9606.ENSP00000319814	0	0	0	0	0.081	0	0	0.725	0.737
UBE2T	CCNA2	4442849	4436109	9606.ENSP00000356243	9606.ENSP00000274026	0	0	0	0	0.65	0.164	0	0.174	0.737
UHRF1	CENPN	4451406	4446136	9606.ENSP00000479617	9606.ENSP00000377007	0	0	0	0	0.691	0	0	0.182	0.736
TPX2	POLE2	4437665	4432952	9606.ENSP00000300403	9606.ENSP00000216367	0	0	0	0	0.723	0	0	0.088	0.736
STMN1	RACGAP1	4448554	4448310	9606.ENSP00000410452	9606.ENSP00000404190	0	0	0	0	0.694	0	0	0.171	0.736
MCM7	TPX2	4438312	4437665	9606.ENSP00000307288	9606.ENSP00000300403	0	0	0	0	0.64	0	0	0.295	0.736
C1R	C1RL	4449877	4435707	9606.ENSP00000438615	9606.ENSP00000266542	0	0	0	0.921	0.157	0.685	0	0.575	0.735
MCM7	AURKA	4438312	4432988	9606.ENSP00000307288	9606.ENSP00000216911	0	0	0	0	0.574	0	0	0.404	0.735
KIF4A	CENPM	4444386	4432895	9606.ENSP00000363524	9606.ENSP00000215980	0	0	0	0	0.674	0	0	0.22	0.735
FBP1	G6PD	4448472	4446162	9606.ENSP00000408025	9606.ENSP00000377192	0.167	0	0	0	0.085	0	0	0.68	0.735
ALDOB	HKDC1	4444463	4441643	9606.ENSP00000363988	9606.ENSP00000346643	0	0	0	0	0.116	0	0.6	0.307	0.733
CYP1A2	CYP2C18	4441211	4436654	9606.ENSP00000342007	9606.ENSP00000285979	0	0	0.443	0.773	0	0	0.65	0.708	0.733
UHRF1	AURKA	4451406	4432988	9606.ENSP00000479617	9606.ENSP00000216911	0	0	0	0	0.701	0	0	0.144	0.733
MYC	CEBPA	4451407	4449403	9606.ENSP00000479618	9606.ENSP00000427514	0	0	0	0	0.056	0.454	0	0.524	0.733
MCM4	OIP5	4435007	4433119	9606.ENSP00000262105	9606.ENSP00000220514	0	0	0	0	0.732	0	0	0	0.732
LDLR	PON1	4450447	4433224	9606.ENSP00000454071	9606.ENSP00000222381	0	0	0	0	0	0	0.54	0.44	0.731
ALDH6A1	ACADS	4450308	4433826	9606.ENSP00000450436	9606.ENSP00000242592	0	0	0	0	0.645	0	0	0.273	0.731
MCM4	CENPM	4435007	4432895	9606.ENSP00000262105	9606.ENSP00000215980	0	0	0	0	0.672	0	0	0.214	0.731
UBE2T	CCNB2	4442849	4436767	9606.ENSP00000356243	9606.ENSP00000288207	0	0	0	0	0.603	0.164	0	0.255	0.731
PLG	CP	4438461	4435459	9606.ENSP00000308938	9606.ENSP00000264613	0	0	0	0	0.209	0.379	0	0.497	0.731
KIF2C	NCAPD2	4443901	4439733	9606.ENSP00000361298	9606.ENSP00000325017	0	0	0	0	0.658	0	0	0.244	0.73
FAM83D	CENPF	4451564	4442771	9606.ENSP00000481110	9606.ENSP00000355922	0	0	0	0	0.68	0	0	0.187	0.729
CYP4F12	CYP4F2	4450272	4433177	9606.ENSP00000448998	9606.ENSP00000221700	0	0	0.449	0.981	0.158	0.685	0	0.713	0.729
RACGAP1	MCM2	4448310	4435544	9606.ENSP00000404190	9606.ENSP00000265056	0	0	0	0	0.706	0	0	0.115	0.729
UHRF1	NCAPG	4451406	4434176	9606.ENSP00000479617	9606.ENSP00000251496	0	0	0	0	0.668	0	0	0.214	0.728
MT1F	MT1E	4440608	4438349	9606.ENSP00000334872	9606.ENSP00000307706	0	0	0	0.975	0.722	0	0	0.875	0.728
HJURP	MCM2	4448718	4435544	9606.ENSP00000414109	9606.ENSP00000265056	0	0	0	0	0.618	0.238	0	0.139	0.727
HMMR	MCM4	4446202	4435007	9606.ENSP00000377492	9606.ENSP00000262105	0	0	0	0	0.662	0	0	0.225	0.727
FAM83D	KIF20A	4451564	4446341	9606.ENSP00000481110	9606.ENSP00000378356	0	0	0	0	0.7	0	0	0.126	0.727
CYP2C19	SLCO1B1	4443723	4434521	9606.ENSP00000360372	9606.ENSP00000256958	0	0	0	0	0.099	0	0	0.71	0.727
KIF2C	RNASEH2A	4443901	4433165	9606.ENSP00000361298	9606.ENSP00000221486	0	0	0	0	0.725	0	0	0	0.725
KIF20A	TK1	4446341	4437779	9606.ENSP00000378356	9606.ENSP00000301634	0	0	0	0	0.6	0	0	0.34	0.725
UBE2C	MCM6	4441865	4435383	9606.ENSP00000348838	9606.ENSP00000264156	0	0	0	0	0.554	0.11	0	0.364	0.725
TK1	AURKA	4437779	4432988	9606.ENSP00000301634	9606.ENSP00000216911	0	0	0	0	0.618	0	0	0.31	0.725
ID1	CDC20	4444680	4443940	9606.ENSP00000365280	9606.ENSP00000361540	0	0	0	0	0.076	0.389	0	0.553	0.725
CYP2C8	SLCO1B1	4443714	4434521	9606.ENSP00000360317	9606.ENSP00000256958	0	0	0	0	0.098	0	0	0.708	0.725
PTTG1	MCM6	4446209	4435383	9606.ENSP00000377536	9606.ENSP00000264156	0	0	0	0	0.627	0	0	0.292	0.724
NUSAP1	FEN1	4450429	4438133	9606.ENSP00000453403	9606.ENSP00000305480	0	0	0	0	0.696	0	0	0.13	0.724
CENPN	UBE2C	4446136	4441865	9606.ENSP00000377007	9606.ENSP00000348838	0	0	0	0	0.687	0	0	0.155	0.724
AKR1B10	ALDH2	4442268	4434937	9606.ENSP00000352584	9606.ENSP00000261733	0	0	0	0	0.111	0.064	0.65	0.165	0.724
UBE2T	TPX2	4442849	4437665	9606.ENSP00000356243	9606.ENSP00000300403	0	0	0	0	0.681	0	0	0.169	0.724
FAM83D	KIF2C	4451564	4443901	9606.ENSP00000481110	9606.ENSP00000361298	0	0	0	0	0.585	0	0	0.363	0.724
PTGS2	ATF3	4442894	4441415	9606.ENSP00000356438	9606.ENSP00000344352	0	0	0	0	0.12	0	0	0.697	0.723
FTCD	C9	4436927	4435259	9606.ENSP00000291670	9606.ENSP00000263408	0	0	0	0	0.722	0	0	0.046	0.723
KNTC1	ATAD2	4440000	4436722	9606.ENSP00000328236	9606.ENSP00000287394	0	0	0	0	0.672	0	0	0.186	0.722
TXNRD1	MSRA	4449713	4438894	9606.ENSP00000434516	9606.ENSP00000313921	0.207	0	0	0	0.048	0	0	0.661	0.722
SLCO1B1	CYP3A5	4434521	4433259	9606.ENSP00000256958	9606.ENSP00000222982	0	0	0	0	0.083	0	0	0.709	0.721
RACGAP1	TRIP13	4448310	4432699	9606.ENSP00000404190	9606.ENSP00000166345	0	0	0	0	0.644	0	0	0.249	0.721
ASPM	MCM6	4442873	4435383	9606.ENSP00000356379	9606.ENSP00000264156	0	0	0	0	0.667	0.057	0	0.182	0.721
MCM3	UBE2C	4451546	4441865	9606.ENSP00000480987	9606.ENSP00000348838	0	0	0	0	0.621	0.11	0	0.24	0.721
RACGAP1	CENPN	4448310	4446136	9606.ENSP00000404190	9606.ENSP00000377007	0	0	0	0	0.607	0	0	0.317	0.72
UBE2C	MCM5	4441865	4432914	9606.ENSP00000348838	9606.ENSP00000216122	0	0	0	0	0.611	0.11	0	0.257	0.72
BCHE	PON1	4435424	4433224	9606.ENSP00000264381	9606.ENSP00000222381	0	0	0	0	0.062	0	0	0.713	0.72
HPR	APOF	4450004	4446789	9606.ENSP00000441828	9606.ENSP00000381250	0	0	0	0	0.065	0	0.54	0.4	0.719
MYC	CCNA2	4451407	4436109	9606.ENSP00000479618	9606.ENSP00000274026	0	0	0	0	0.098	0	0	0.7	0.718
BHMT	PEMT	4436127	4434430	9606.ENSP00000274353	9606.ENSP00000255389	0	0	0	0	0.062	0	0	0.712	0.718
FOS	MAP2K1	4438204	4437859	9606.ENSP00000306245	9606.ENSP00000302486	0	0	0	0	0	0.131	0	0.689	0.718
KIF4A	MCM7	4444386	4438312	9606.ENSP00000363524	9606.ENSP00000307288	0	0	0	0	0.631	0	0	0.267	0.718
XDH	CAT	4445208	4433793	9606.ENSP00000368727	9606.ENSP00000241052	0	0	0	0	0.062	0	0	0.71	0.717
BGN	PCOLCE	4439914	4433264	9606.ENSP00000327336	9606.ENSP00000223061	0	0	0	0	0.368	0.358	0	0.359	0.717
APCS	CRP	4434407	4434405	9606.ENSP00000255040	9606.ENSP00000255030	0	0	0	0.942	0.545	0.379	0	0.714	0.717
CDCA8	RNASEH2A	4444097	4433165	9606.ENSP00000362146	9606.ENSP00000221486	0	0	0	0	0.716	0	0	0	0.716
HMMR	ATAD2	4446202	4436722	9606.ENSP00000377492	9606.ENSP00000287394	0	0	0	0	0.685	0	0	0.135	0.716
STAB2	TIMD4	4445802	4436142	9606.ENSP00000373539	9606.ENSP00000274532	0	0	0	0	0.063	0	0	0.708	0.715
HAMP	CRP	4451011	4434405	9606.ENSP00000471894	9606.ENSP00000255030	0	0	0	0	0.064	0	0	0.709	0.715
UBE2T	GINS2	4442849	4434310	9606.ENSP00000356243	9606.ENSP00000253462	0	0	0	0	0.654	0	0	0.209	0.715
HPX	CP	4435671	4435459	9606.ENSP00000265983	9606.ENSP00000264613	0	0	0	0	0.065	0	0	0.708	0.715
PTGS2	CAT	4442894	4433793	9606.ENSP00000356438	9606.ENSP00000241052	0	0	0	0	0	0.131	0	0.685	0.715
ANO1	PDGFRA	4441722	4434540	9606.ENSP00000347454	9606.ENSP00000257290	0	0	0	0	0.061	0	0	0.709	0.715
C1R	MBL2	4449877	4444298	9606.ENSP00000438615	9606.ENSP00000363079	0	0	0	0	0.061	0	0	0.708	0.714
CP	CRP	4435459	4434405	9606.ENSP00000264613	9606.ENSP00000255030	0	0	0	0	0.085	0	0	0.701	0.714
NCAPD2	MCM4	4439733	4435007	9606.ENSP00000325017	9606.ENSP00000262105	0	0	0	0	0.701	0	0	0.075	0.712
TOP2A	UBE2T	4448614	4442849	9606.ENSP00000411532	9606.ENSP00000356243	0	0	0	0	0.612	0.05	0	0.282	0.712
CD163	C1RL	4442211	4435707	9606.ENSP00000352071	9606.ENSP00000266542	0	0	0	0	0	0	0	0.712	0.712
PTTG1	TK1	4446209	4437779	9606.ENSP00000377536	9606.ENSP00000301634	0	0	0	0	0.572	0	0	0.353	0.711
AURKB	TK1	4438898	4437779	9606.ENSP00000313950	9606.ENSP00000301634	0	0	0	0	0.631	0	0	0.249	0.711
MELK	C1orf112	4437455	4436655	9606.ENSP00000298048	9606.ENSP00000286031	0	0	0	0	0.621	0	0	0.266	0.71
BCHE	CAT	4435424	4433793	9606.ENSP00000264381	9606.ENSP00000241052	0	0	0	0	0.061	0	0	0.704	0.71
TK1	TPX2	4437779	4437665	9606.ENSP00000301634	9606.ENSP00000300403	0	0	0	0	0.618	0	0	0.269	0.709
KIF4A	POLE2	4444386	4432952	9606.ENSP00000363524	9606.ENSP00000216367	0	0	0	0	0.608	0	0	0.287	0.709
UBE2T	TK1	4442849	4437779	9606.ENSP00000356243	9606.ENSP00000301634	0	0	0	0	0.696	0	0	0.081	0.709
NUSAP1	POLE2	4450429	4432952	9606.ENSP00000453403	9606.ENSP00000216367	0	0	0	0	0.675	0	0	0.141	0.709
FAM83D	CCNB2	4451564	4436767	9606.ENSP00000481110	9606.ENSP00000288207	0	0	0	0	0.654	0	0	0.194	0.709
CP	C9	4435459	4435259	9606.ENSP00000264613	9606.ENSP00000263408	0	0	0	0	0.518	0	0	0.42	0.708
MT1M	CAT	4445277	4433793	9606.ENSP00000369146	9606.ENSP00000241052	0	0	0	0	0.077	0	0	0.696	0.708
TPX2	RNASEH2A	4437665	4433165	9606.ENSP00000300403	9606.ENSP00000221486	0	0	0	0	0.699	0	0	0.069	0.708
CENPN	TRIP13	4446136	4432699	9606.ENSP00000377007	9606.ENSP00000166345	0	0	0	0	0.707	0	0	0	0.707
NUSAP1	TK1	4450429	4437779	9606.ENSP00000453403	9606.ENSP00000301634	0	0	0	0	0.571	0	0	0.346	0.707
PTTG1	MCM4	4446209	4435007	9606.ENSP00000377536	9606.ENSP00000262105	0	0	0	0	0.567	0	0	0.348	0.706
UHRF1	NCAPD2	4451406	4439733	9606.ENSP00000479617	9606.ENSP00000325017	0	0	0	0	0.701	0	0	0.06	0.706
CYP2E1	CAT	4449959	4433793	9606.ENSP00000440689	9606.ENSP00000241052	0.045	0	0	0	0.064	0	0	0.697	0.705
PTGS2	ARG1	4442894	4441926	9606.ENSP00000356438	9606.ENSP00000349446	0	0	0	0	0	0	0	0.705	0.705
MYC	ID1	4451407	4444680	9606.ENSP00000479618	9606.ENSP00000365280	0	0	0	0	0.066	0	0	0.697	0.705
ABAT	GOT1	4446571	4443556	9606.ENSP00000379845	9606.ENSP00000359539	0	0	0	0	0.09	0.081	0	0.675	0.705
UBE2C	NCAPD2	4441865	4439733	9606.ENSP00000348838	9606.ENSP00000325017	0	0	0	0	0.617	0	0	0.258	0.704
NR1I3	CYP2C9	4442999	4434798	9606.ENSP00000356959	9606.ENSP00000260682	0	0	0	0	0.06	0.085	0	0.684	0.704
MCM3	ASPM	4451546	4442873	9606.ENSP00000480987	9606.ENSP00000356379	0	0	0	0	0.684	0.057	0	0.081	0.703
CENPF	MCM2	4442771	4435544	9606.ENSP00000355922	9606.ENSP00000265056	0	0	0	0	0.595	0	0	0.296	0.703
KNTC1	MCM2	4440000	4435544	9606.ENSP00000328236	9606.ENSP00000265056	0	0	0	0	0.664	0	0	0.151	0.703
IDO2	KMO	4450084	4442693	9606.ENSP00000443432	9606.ENSP00000355517	0	0	0	0	0.117	0	0	0.676	0.702
FBP1	G6PC	4448472	4434327	9606.ENSP00000408025	9606.ENSP00000253801	0	0	0	0	0.085	0	0	0.688	0.702
KIF20A	KNTC1	4446341	4440000	9606.ENSP00000378356	9606.ENSP00000328236	0	0	0	0	0.626	0	0	0.234	0.702
BARD1	AURKA	4434809	4432988	9606.ENSP00000260947	9606.ENSP00000216911	0	0	0	0	0.25	0.408	0	0.384	0.702
MTTP	NPC1L1	4449410	4436817	9606.ENSP00000427679	9606.ENSP00000289547	0	0	0	0	0.086	0	0	0.686	0.701
UHRF1	PRC1	4451406	4446249	9606.ENSP00000479617	9606.ENSP00000377793	0	0	0	0	0.656	0	0	0.167	0.701
NR1I3	PPARGC1A	4442999	4435507	9606.ENSP00000356959	9606.ENSP00000264867	0	0	0	0	0.05	0.548	0	0.359	0.701
SHBG	IGFBP1	4445394	4436188	9606.ENSP00000369816	9606.ENSP00000275525	0	0	0	0	0	0	0	0.701	0.701
RACGAP1	FOXM1	4448310	4441245	9606.ENSP00000404190	9606.ENSP00000342307	0	0	0	0	0.653	0	0	0.17	0.7
VWF	LYVE1	4434871	4434461	9606.ENSP00000261405	9606.ENSP00000256178	0	0	0	0	0.349	0	0	0.559	0.7
ESR1	FHL2	4448358	4447410	9606.ENSP00000405330	9606.ENSP00000386665	0	0	0	0	0	0.404	0	0.517	0.7
TK1	MELK	4437779	4437455	9606.ENSP00000301634	9606.ENSP00000298048	0	0	0	0	0.626	0	0	0.23	0.7
KIF2C	POLE2	4443901	4432952	9606.ENSP00000361298	9606.ENSP00000216367	0	0	0	0	0.617	0	0	0.249	0.7
MT1M	MT1E	4445277	4438349	9606.ENSP00000369146	9606.ENSP00000307706	0	0	0	0.971	0.698	0	0	0.269	0.7
